# Supplementary material for: Larval growth rate is not a major determinant of adult wing shape and eyespot size in the seasonally polyphenic butterfly Melanitis leda
Source: PeerJ journal article supplement (doi:10.7717/peerj.18295), 2024-10-16
Supplement: Appendix_1_Leda_PP.docx [file Appendix_1_Leda_PP.docx]

**Appendix 1.**

Results of follow-up experiment to verify unexpected non-linear reaction norm in the Temperature Experiment.

Methods the same as for the Temperature Experiment (see main text), using three temperatures.


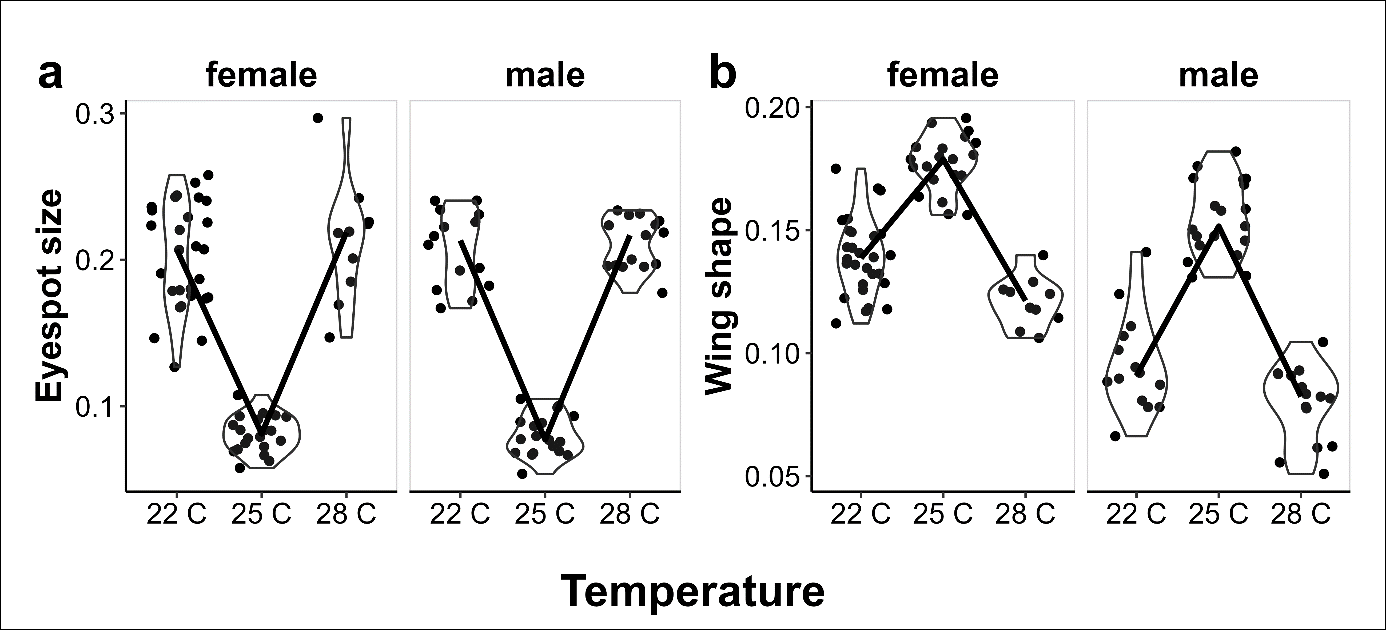


Figure A1.1. Provisional reaction norms of *M. leda* for a) Eyespot size, and b) wing shape.

The results are qualitatively similar to those of the main experiment (see Figure 3 in main text): a non-linear effect of temperature on adult phenotype.
