# Supplementary material for: Larval growth rate is not a major determinant of adult wing shape and eyespot size in the seasonally polyphenic butterfly Melanitis leda
Source: PeerJ journal article supplement (doi:10.7717/peerj.18295), 2024-10-16
Supplement: Data.xlsx [file Data.xlsx]

## Sheet: peerj-94186-LedaPPaveragesNEW
dat_id	Author	Ind	pop	gen	sleeve	expt	Temp	Humidity	plant	sex	larv_time	pup_time	pup_mss	grwth_rate	quirality	wingtype	Side	phenotype	measureWA	measureTAsm	measureTAlg	measureES	cat_eyesp	mn_cat_eyesp	cat_wingshape	cat_irror	hatched_date	sqrtES
2903	hallow	1_18_85	India	1	hallow_1	Temp_HR	18 C	85 % RH	CY	male	31	24	0.4124	0.0240111	Right	Forewing	uns	dry	NA	NA	NA	NA	NA	NA	NA	NA	NA	NA
2904	hallow	1_18_85	India	1	hallow_1	Temp_HR	18 C	85 % RH	CY	male	31	24	0.4124	0.0240111	Right	Hindwing	uns	dry	NA	NA	NA	NA	NA	NA	NA	NA	NA	NA
2913	hallow	10_18_85	India	1	hallow_2	Temp_HR	18 C	85 % RH	CY	male	42	NA	0.4698	0.0185092	Right	Forewing	uns	dry	NA	NA	NA	NA	NA	NA	NA	NA	NA	NA
2914	hallow	10_18_85	India	1	hallow_2	Temp_HR	18 C	85 % RH	CY	male	42	NA	0.4698	0.0185092	Right	Hindwing	uns	dry	NA	NA	NA	NA	NA	NA	NA	NA	NA	NA
2923	hallow	11_18_85	India	1	hallow_2	Temp_HR	18 C	85 % RH	CY	male	42	28	0.3613	0.016958	Right	Forewing	uns	dry	137.044	NA	6.344	0.00336899	NA	NA	NA	NA	NA	0.058043
2924	hallow	11_18_85	India	1	hallow_2	Temp_HR	18 C	85 % RH	CY	male	42	28	0.3613	0.016958	Right	Hindwing	uns	dry	135.59	NA	17.1919	0.00235046	NA	NA	NA	NA	NA	0.0484816
2933	hallow	12_18_85	India	1	hallow_14	Temp_HR	18 C	85 % RH	CY	male	40	17	0.4228	0.0187637	Right	Forewing	uns	dry	144.573	NA	5.1868	0.00842549	NA	NA	NA	NA	NA	0.0917905
2934	hallow	12_18_85	India	1	hallow_14	Temp_HR	18 C	85 % RH	CY	male	40	17	0.4228	0.0187637	Right	Hindwing	uns	dry	138.014	NA	13.4471	0	NA	NA	NA	NA	NA	0
2943	hallow	13_18_85	India	1	hallow_14	Temp_HR	18 C	85 % RH	CY	female	40	17	0.4482	0.0191322	Right	Forewing	uns	dry	136.977	NA	5.7215	0.004949	NA	NA	NA	NA	NA	0.0703491
2944	hallow	13_18_85	India	1	hallow_14	Temp_HR	18 C	85 % RH	CY	female	40	17	0.4482	0.0191322	Right	Hindwing	uns	dry	146.368	NA	17.5729	0	NA	NA	NA	NA	NA	0
2953	hallow	14_18_85	India	1	hallow_14	Temp_HR	18 C	85 % RH	CY	male	41	16	0.4708	0.0189741	Right	Forewing	uns	dry	147.143	NA	4.2014	0.00745536	NA	NA	NA	NA	NA	0.0863444
2954	hallow	14_18_85	India	1	hallow_14	Temp_HR	18 C	85 % RH	CY	male	41	16	0.4708	0.0189741	Right	Hindwing	uns	dry	148.574	NA	13.4588	0.00942629	NA	NA	NA	NA	NA	0.0970891
2963	hallow	15_18_85	India	1	hallow_14	Temp_HR	18 C	85 % RH	CY	female	43	17	0.3669	0.0166487	Right	Forewing	uns	dry	NA	NA	NA	NA	NA	NA	NA	NA	NA	NA
2964	hallow	15_18_85	India	1	hallow_14	Temp_HR	18 C	85 % RH	CY	female	43	17	0.3669	0.0166487	Right	Hindwing	uns	dry	NA	NA	NA	NA	NA	NA	NA	NA	NA	NA
2973	hallow	16_18_85	India	1	hallow_14	Temp_HR	18 C	85 % RH	CY	male	44	13	0.4309	0.0171661	Right	Forewing	uns	int	134.075	NA	2.4098	0.0142204	NA	NA	NA	NA	NA	0.119249
2974	hallow	16_18_85	India	1	hallow_14	Temp_HR	18 C	85 % RH	CY	male	44	13	0.4309	0.0171661	Right	Hindwing	uns	int	126.166	NA	9.9296	0.0437272	NA	NA	NA	NA	NA	0.20911
2981	hallow	17_18_85	India	1	hallow_14	Temp_HR	18 C	85 % RH	CY	female	44	17	0.4513	0.0174329	Right	Forewing	uns	dry	148.948	NA	6.0112	0.00284462	NA	NA	NA	NA	NA	0.053335
2982	hallow	17_18_85	India	1	hallow_14	Temp_HR	18 C	85 % RH	CY	female	44	17	0.4513	0.0174329	Right	Hindwing	uns	dry	171.524	NA	11.7064	0	NA	NA	NA	NA	NA	0
2991	hallow	18_18_85	India	1	hallow_19	Temp_HR	18 C	85 % RH	CY	male	41	16	0.4661	0.0189108	Right	Forewing	uns	dry	154.144	NA	4.8073	0.00253399	NA	NA	NA	NA	NA	0.0503388
2992	hallow	18_18_85	India	1	hallow_19	Temp_HR	18 C	85 % RH	CY	male	41	16	0.4661	0.0189108	Right	Hindwing	uns	dry	157.277	NA	13	0	NA	NA	NA	NA	NA	0
3001	hallow	19_18_85	India	1	hallow_19	Temp_HR	18 C	85 % RH	CY	male	42	15	0.4078	0.0176563	Right	Forewing	uns	dry	127.823	NA	5.554	0.00397738	NA	NA	NA	NA	NA	0.0630665
3002	hallow	19_18_85	India	1	hallow_19	Temp_HR	18 C	85 % RH	CY	male	42	15	0.4078	0.0176563	Right	Hindwing	uns	dry	137.634	NA	17.0343	0.00110293	NA	NA	NA	NA	NA	0.0332103
3011	hallow	2_18_85	India	1	hallow_1	Temp_HR	18 C	85 % RH	CY	male	31	20	0.3929	0.0236265	Right	Forewing	NA	wet	130.731	NA	3.7655	0.00799201	NA	NA	NA	NA	NA	0.089398
3012	hallow	2_18_85	India	1	hallow_1	Temp_HR	18 C	85 % RH	CY	male	31	20	0.3929	0.0236265	Right	Hindwing	NA	wet	127.424	NA	9.3409	0.00346718	NA	NA	NA	NA	NA	0.0588827
3021	hallow	20_18_85	India	1	hallow_19	Temp_HR	18 C	85 % RH	CY	female	44	NA	0.4713	0.0176867	Right	Forewing	NA	dry	138.594	NA	5.4924	0.00227354	NA	NA	NA	NA	NA	0.0476817
3022	hallow	20_18_85	India	1	hallow_19	Temp_HR	18 C	85 % RH	CY	female	44	NA	0.4713	0.0176867	Right	Hindwing	NA	dry	136.588	NA	17.8921	0	NA	NA	NA	NA	NA	0
3031	hallow	21_18_85	India	1	hallow_19	Temp_HR	18 C	85 % RH	CY	female	44	14	0.4725	0.0177017	Right	Forewing	NA	dry	133.771	NA	6.1254	0.00612765	NA	NA	NA	NA	NA	0.0782793
3032	hallow	21_18_85	India	1	hallow_19	Temp_HR	18 C	85 % RH	CY	female	44	14	0.4725	0.0177017	Right	Hindwing	NA	dry	147.406	NA	19.1931	0	NA	NA	NA	NA	NA	0
3041	hallow	22_18_85	India	1	hallow_19	Temp_HR	18 C	85 % RH	CY	female	44	NA	0.4274	0.0171195	Right	Forewing	NA	NA	NA	NA	NA	NA	NA	NA	NA	NA	NA	NA
3042	hallow	22_18_85	India	1	hallow_19	Temp_HR	18 C	85 % RH	CY	female	44	NA	0.4274	0.0171195	Right	Hindwing	NA	NA	NA	NA	NA	NA	NA	NA	NA	NA	NA	NA
3051	hallow	23_18_85	India	1	hallow_14	Temp_HR	18 C	85 % RH	CY	female	49	12	0.4185	0.0152652	Right	Forewing	NA	dry	NA	NA	NA	NA	NA	NA	NA	NA	NA	NA
3052	hallow	23_18_85	India	1	hallow_14	Temp_HR	18 C	85 % RH	CY	female	49	12	0.4185	0.0152652	Right	Hindwing	NA	dry	NA	NA	NA	NA	NA	NA	NA	NA	NA	NA
3105	hallow	3_18_85	India	1	hallow_1	Temp_HR	18 C	85 % RH	CY	female	37	18	0.4504	0.0207172	Right	Forewing	NA	dry	149.574	NA	6.1207	0.00280932	NA	NA	NA	NA	NA	0.053003
3106	hallow	3_18_85	India	1	hallow_1	Temp_HR	18 C	85 % RH	CY	female	37	18	0.4504	0.0207172	Right	Hindwing	NA	dry	156.632	NA	20.5106	0	NA	NA	NA	NA	NA	0
3167	hallow	4_18_85	India	1	hallow_1	Temp_HR	18 C	85 % RH	CY	female	37	19	0.4962	0.0213969	Right	Forewing	NA	dry	163.252	NA	6.1367	0	NA	NA	NA	NA	NA	0
3168	hallow	4_18_85	India	1	hallow_1	Temp_HR	18 C	85 % RH	CY	female	37	19	0.4962	0.0213969	Right	Hindwing	NA	dry	148.515	NA	19.0684	0	NA	NA	NA	NA	NA	0
3225	hallow	6_18_85	India	1	hallow_2	Temp_HR	18 C	85 % RH	CY	female	37	18	0.4692	0.0210015	Right	Forewing	NA	dry	159.659	NA	7.3316	0.00479897	NA	NA	NA	NA	NA	0.0692746
3226	hallow	6_18_85	India	1	hallow_2	Temp_HR	18 C	85 % RH	CY	female	37	18	0.4692	0.0210015	Right	Hindwing	NA	dry	157.978	NA	17.3452	0.00192242	NA	NA	NA	NA	NA	0.0438454
3241	hallow	7_18_85	India	1	hallow_2	Temp_HR	18 C	85 % RH	CY	female	37	19	0.4595	0.0208558	Right	Forewing	NA	dry	152.361	NA	5.2039	0.00714157	NA	NA	NA	NA	NA	0.0845078
3242	hallow	7_18_85	India	1	hallow_2	Temp_HR	18 C	85 % RH	CY	female	37	19	0.4595	0.0208558	Right	Hindwing	NA	dry	154.268	NA	17.7304	0.00622747	NA	NA	NA	NA	NA	0.0789143
3251	hallow	8_18_85	India	1	hallow_2	Temp_HR	18 C	85 % RH	CY	male	42	17	0.407	0.0176448	Right	Forewing	NA	dry	163.171	NA	5.5081	0.00385178	NA	NA	NA	NA	NA	0.0620627
3252	hallow	8_18_85	India	1	hallow_2	Temp_HR	18 C	85 % RH	CY	male	42	17	0.407	0.0176448	Right	Hindwing	NA	dry	160.637	NA	18.7134	0.00281318	NA	NA	NA	NA	NA	0.0530395
3259	hallow	9_18_85	India	1	hallow_2	Temp_HR	18 C	85 % RH	CY	female	42	18	0.4778	0.0186137	Right	Forewing	NA	dry	NA	NA	NA	NA	NA	NA	NA	NA	NA	NA
3260	hallow	9_18_85	India	1	hallow_2	Temp_HR	18 C	85 % RH	CY	female	42	18	0.4778	0.0186137	Right	Hindwing	NA	dry	NA	NA	NA	NA	NA	NA	NA	NA	NA	NA
637	moore	19-01-01	Ghana	2	Temp_1.1	Temp_1	19 C	75 % RH	CY	male	38	18	0.5653	0.0217592	Right	Forewing	uns	dry	146.318	0.9654	4.16505	0.00452201	NA	NA	NA	NA	100	0.0718178
1823	moore	19-01-01	Ghana	2	Temp_1.1	Temp_1	19 C	75 % RH	CY	male	38	18	0.5653	0.0217592	Right	Hindwing	uns	dry	156.552	5.04895	21.1891	0.00678616	NA	NA	NA	NA	100	0.0862022
630	moore	19-01-02	Ghana	2	Temp_1.1	Temp_1	19 C	75 % RH	CY	female	39	17	0.5075	0.0204525	Right	Forewing	uns	dry	148.961	1.35145	5.6408	0.00571408	NA	NA	NA	NA	100	0.0765739
1884	moore	19-01-02	Ghana	2	Temp_1.1	Temp_1	19 C	75 % RH	CY	female	39	17	0.5075	0.0204525	Left	Hindwing	ups	dry	161.896	5.6739	21.9375	0.00698124	NA	NA	NA	NA	100	0.0837844
812	moore	19-01-03	Ghana	2	Temp_1.1	Temp_1	19 C	75 % RH	CY	male	43	17	0.672	0.0203699	Right	Forewing	uns	dry	163.365	1.04645	3.90835	0.00319141	NA	NA	NA	NA	100	0.0576492
1992	moore	19-01-03	Ghana	2	Temp_1.1	Temp_1	19 C	75 % RH	CY	male	43	17	0.672	0.0203699	Right	Hindwing	uns	dry	179.539	4.60495	19.0102	0.00370348	NA	NA	NA	NA	100	0.0576073
872	moore	19-02-02	Ghana	2	Temp_2.1	Temp_1	19 C	75 % RH	CY	male	37	16	0.4507	0.0207218	Left	Forewing	ups	dry	128.258	0.78985	3.1803	0.00394668	NA	NA	NA	NA	99	0.0682617
1977	moore	19-02-02	Ghana	2	Temp_2.1	Temp_1	19 C	75 % RH	CY	male	37	16	0.4507	0.0207218	Left	Hindwing	ups	dry	133.113	4.0179	18.9564	0.00633296	NA	NA	NA	NA	99	0.0795799
671	moore	19-02-03	Ghana	2	Temp_2.1	Temp_1	19 C	75 % RH	CY	female	37	17	0.5577	0.0222467	Right	Forewing	uns	dry	155.197	1.6251	6.0863	0.00453663	NA	NA	NA	NA	99	0.0698039
1867	moore	19-02-03	Ghana	2	Temp_2.1	Temp_1	19 C	75 % RH	CY	female	37	17	0.5577	0.0222467	Right	Hindwing	uns	dry	168.055	4.85495	21.2732	0.00532918	NA	NA	NA	NA	99	0.0787227
936	moore	19-02-04	Ghana	2	Temp_2.1	Temp_1	19 C	75 % RH	CY	female	38	17	0.5142	0.0210827	Left	Forewing	ups	dry	130.26	1.0156	4.35975	0.00315556	NA	NA	NA	NA	99	0.0520039
1763	moore	19-02-04	Ghana	2	Temp_2.1	Temp_1	19 C	75 % RH	CY	female	38	17	0.5142	0.0210827	Right	Hindwing	uns	dry	144.799	4.8717	20.6669	0.0110816	NA	NA	NA	NA	99	0.107153
806	moore	19-02-05	Ghana	2	Temp_2.1	Temp_1	19 C	75 % RH	CY	male	40	17	0.5069	0.0199334	Right	Forewing	uns	dry	143.989	1.18135	4.2212	0.00221459	NA	NA	NA	NA	99	0.0509508
1944	moore	19-02-05	Ghana	2	Temp_2.1	Temp_1	19 C	75 % RH	CY	male	40	17	0.5069	0.0199334	Right	Hindwing	uns	dry	152.631	5.0074	20.1668	0.00552375	NA	NA	NA	NA	99	0.0765609
869	moore	19-02-07	Ghana	2	Temp_2.1	Temp_1	19 C	75 % RH	CY	male	39	17	0.4584	0.0197705	Right	Forewing	uns	dry	123.132	0.99535	3.78335	0.00319517	NA	NA	NA	NA	99	0.0614072
1965	moore	19-02-07	Ghana	2	Temp_2.1	Temp_1	19 C	75 % RH	CY	male	39	17	0.4584	0.0197705	Left	Hindwing	ups	dry	135.427	4.0126	16.827	0.00481365	NA	NA	NA	NA	99	0.0826355
861	moore	19-02-08	Ghana	2	Temp_2.1	Temp_1	19 C	75 % RH	CY	female	40	16	0.4383	0.0189902	Right	Forewing	uns	dry	141.172	1.31595	4.8829	0.00313697	NA	NA	NA	NA	99	0.0579697
2010	moore	19-02-08	Ghana	2	Temp_2.1	Temp_1	19 C	75 % RH	CY	female	40	16	0.4383	0.0189902	Left	Hindwing	ups	dry	132.241	4.6515	14.7713	0.00458638	NA	NA	NA	NA	99	0.0752742
933	moore	19-02-09	Ghana	2	Temp_2.1	Temp_1	19 C	75 % RH	CY	male	40	17	0.5105	0.0199805	Left	Forewing	ups	dry	143.814	1.0978	4.23565	0.00327268	NA	NA	NA	NA	99	0.0580564
2016	moore	19-02-09	Ghana	2	Temp_2.1	Temp_1	19 C	75 % RH	CY	male	40	17	0.5105	0.0199805	Right	Hindwing	uns	dry	159.757	4.70555	19.4373	0.00450685	NA	NA	NA	NA	99	0.0682774
885	moore	19-02-10	Ghana	2	Temp_2.1	Temp_1	19 C	75 % RH	CY	male	40	17	0.5046	0.0199032	Right	Forewing	uns	dry	135.953	0.9965	3.70585	0.00319501	NA	NA	NA	NA	99	0.0586447
1990	moore	19-02-10	Ghana	2	Temp_2.1	Temp_1	19 C	75 % RH	CY	male	40	17	0.5046	0.0199032	Left	Hindwing	ups	dry	145.151	4.40445	18.4108	0.00575098	NA	NA	NA	NA	99	0.0768139
893	moore	19-02-11	Ghana	2	Temp_2.1	Temp_1	19 C	75 % RH	CY	female	41	16	0.5287	0.0197221	Right	Forewing	uns	dry	149.016	1.22015	5.2644	0.00261068	NA	NA	NA	NA	99	0.0487269
2009	moore	19-02-11	Ghana	2	Temp_2.1	Temp_1	19 C	75 % RH	CY	female	41	16	0.5287	0.0197221	Left	Hindwing	ups	dry	154.693	4.8809	19.2389	0.00510533	NA	NA	NA	NA	99	0.0759845
930	moore	19-02-12	Ghana	2	Temp_2.1	Temp_1	19 C	75 % RH	CY	female	41	16	0.423	0.0183089	Right	Forewing	uns	dry	133.017	1.1676	4.66565	0.00260778	NA	NA	NA	NA	99	0.0550083
1826	moore	19-02-12	Ghana	2	Temp_2.1	Temp_1	19 C	75 % RH	CY	female	41	16	0.423	0.0183089	Left	Hindwing	ups	dry	136.16	3.8541	15.8213	0.00911282	NA	NA	NA	NA	99	0.0943182
815	moore	19-02-14	Ghana	2	Temp_2.1	Temp_1	19 C	75 % RH	CY	male	41	18	0.5054	0.019428	Right	Forewing	uns	dry	147.274	0.9609	3.76015	0.00351722	NA	NA	NA	NA	99	0.0587349
2062	moore	19-02-14	Ghana	2	Temp_2.1	Temp_1	19 C	75 % RH	CY	male	41	18	0.5054	0.019428	Left	Hindwing	ups	dry	152.072	4.5987	19.049	0.00249879	NA	NA	NA	NA	99	0.055162
975	moore	19-02-15	Ghana	2	Temp_2.1	Temp_1	19 C	75 % RH	CY	female	41	16	0.43	0.0184094	Right	Forewing	uns	dry	140.624	1.1715	4.8001	0.00187157	NA	NA	NA	NA	99	0.0471644
1986	moore	19-02-15	Ghana	2	Temp_2.1	Temp_1	19 C	75 % RH	CY	female	41	16	0.43	0.0184094	Right	Hindwing	uns	dry	139.48	3.9056	18.1228	0.00617946	NA	NA	NA	NA	99	0.0817212
883	moore	19-02-16	Ghana	2	Temp_2.1	Temp_1	19 C	75 % RH	CY	male	42	17	0.5101	0.019024	Left	Forewing	ups	dry	150.769	1.37365	5.06965	0.00282406	NA	NA	NA	NA	99	0.0583965
2052	moore	19-02-16	Ghana	2	Temp_2.1	Temp_1	19 C	75 % RH	CY	male	42	17	0.5101	0.019024	Left	Hindwing	ups	dry	155.384	4.71525	18.5156	0.00257856	NA	NA	NA	NA	99	0.060622
836	moore	19-02-17	Ghana	2	Temp_2.1	Temp_1	19 C	75 % RH	CY	female	42	17	0.4575	0.0183463	Right	Forewing	uns	dry	147.38	1.3991	5.42245	0.00311446	NA	NA	NA	NA	99	0.0558649
1889	moore	19-02-17	Ghana	2	Temp_2.1	Temp_1	19 C	75 % RH	CY	female	42	17	0.4575	0.0183463	Right	Hindwing	uns	dry	152.376	5.27045	21.2355	0.0065906	NA	NA	NA	NA	99	0.0788693
942	moore	19-02-18	Ghana	2	Temp_2.1	Temp_1	19 C	75 % RH	CY	female	42	17	0.3897	0.0173911	Left	Forewing	ups	dry	110.995	1.17005	4.40905	0.00261728	NA	NA	NA	NA	99	0.0537926
1991	moore	19-02-18	Ghana	2	Temp_2.1	Temp_1	19 C	75 % RH	CY	female	42	17	0.3897	0.0173911	Left	Hindwing	ups	dry	128.606	4.1621	15.9926	0.00485181	NA	NA	NA	NA	99	0.0728488
629	moore	19-02-19	Ghana	2	Temp_2.1	Temp_1	19 C	75 % RH	CY	female	43	16	0.4463	0.0177722	Right	Forewing	uns	dry	143.494	1.76255	6.5033	0.00549523	NA	NA	NA	NA	99	0.0751469
1856	moore	19-02-19	Ghana	2	Temp_2.1	Temp_1	19 C	75 % RH	CY	female	43	16	0.4463	0.0177722	Right	Hindwing	uns	dry	143.638	4.8527	21.3364	0.0079004	NA	NA	NA	NA	99	0.0889241
830	moore	19-02-20	Ghana	2	Temp_2.1	Temp_1	19 C	75 % RH	CY	NA	43	16	0.5111	0.0185937	Left	Forewing	ups	dry	155.525	1.5483	5.58015	0.00364355	NA	NA	NA	NA	99	0.0641315
1947	moore	19-02-20	Ghana	2	Temp_2.1	Temp_1	19 C	75 % RH	CY	NA	43	16	0.5111	0.0185937	Right	Hindwing	uns	dry	167.241	4.9405	21.6425	0.00587298	NA	NA	NA	NA	99	0.077912
747	moore	19-02-21	Ghana	2	Temp_2.1	Temp_1	19 C	75 % RH	CY	female	46	16	0.4355	0.016478	Right	Forewing	uns	dry	131.103	1.1693	4.8191	0.00426789	NA	NA	NA	NA	99	0.0666074
1843	moore	19-02-21	Ghana	2	Temp_2.1	Temp_1	19 C	75 % RH	CY	female	46	16	0.4355	0.016478	Right	Hindwing	uns	dry	136.798	4.2673	17.2917	0.0103158	NA	NA	NA	NA	99	0.10272
977	moore	19-02-23	Ghana	2	Temp_2.1	Temp_1	19 C	75 % RH	CY	female	48	18	0.4483	0.0159447	Left	Forewing	ups	dry	136.652	1.48235	5.8295	0.00217616	NA	NA	NA	NA	99	0.0482752
2028	moore	19-02-23	Ghana	2	Temp_2.1	Temp_1	19 C	75 % RH	CY	female	48	18	0.4483	0.0159447	Left	Hindwing	ups	dry	148.751	4.1104	17.2061	0.00410478	NA	NA	NA	NA	99	0.0679288
898	moore	19-08-01	Ghana	2	moore_8.1	Temp_1	19 C	75 % RH	CY	male	39	16	0.5891	0.0214947	Left	Forewing	ups	dry	158.097	1.23895	4.495	0.00314688	NA	NA	NA	NA	103	0.0582104
1954	moore	19-08-01	Ghana	2	moore_8.1	Temp_1	19 C	75 % RH	CY	male	39	16	0.5891	0.0214947	Left	Hindwing	ups	dry	170.563	5.40395	21.2232	0.00564139	NA	NA	NA	NA	103	0.0746525
677	moore	19-08-02	Ghana	2	moore_8.1	Temp_1	19 C	75 % RH	CY	female	40	15	0.5062	0.0199242	Left	Forewing	ups	dry	154.281	1.1433	4.497	0.004968	NA	NA	NA	NA	103	0.0744653
1796	moore	19-08-02	Ghana	2	moore_8.1	Temp_1	19 C	75 % RH	CY	female	40	15	0.5062	0.0199242	Left	Hindwing	ups	dry	159.416	5.29955	22.5223	0.00871163	NA	NA	NA	NA	103	0.100261
724	moore	19-08-03	Ghana	2	moore_8.1	Temp_1	19 C	75 % RH	CY	male	42	16	0.531	0.0192804	Left	Forewing	ups	dry	148.919	1.3275	4.8595	0.00415026	NA	NA	NA	NA	103	0.0688491
2001	moore	19-08-03	Ghana	2	moore_8.1	Temp_1	19 C	75 % RH	CY	male	42	16	0.531	0.0192804	Right	Hindwing	uns	dry	164.131	5.3646	22.301	0.00384988	NA	NA	NA	NA	103	0.0669785
906	moore	19-08-04	Ghana	2	moore_8.1	Temp_1	19 C	75 % RH	CY	male	43	15	0.5441	0.0189856	Right	Forewing	uns	dry	141.387	1.0815	4.1322	0.00266901	NA	NA	NA	NA	103	0.0527496
1904	moore	19-08-04	Ghana	2	moore_8.1	Temp_1	19 C	75 % RH	CY	male	43	15	0.5441	0.0189856	Right	Hindwing	uns	dry	149.112	4.5774	17.6939	0.00475237	NA	NA	NA	NA	103	0.0752656
944	moore	19-08-05	Ghana	2	moore_8.1	Temp_1	19 C	75 % RH	CY	male	43	16	0.5578	0.0191436	Left	Forewing	ups	dry	164.44	1.29285	4.963	0.00289019	NA	NA	NA	NA	103	0.0545361
2032	moore	19-08-05	Ghana	2	moore_8.1	Temp_1	19 C	75 % RH	CY	male	43	16	0.5578	0.0191436	Left	Hindwing	ups	dry	168.891	5.35925	21.7566	0.00339966	NA	NA	NA	NA	103	0.0621431
632	moore	19-08-06	Ghana	2	moore_8.1	Temp_1	19 C	75 % RH	CY	female	43	16	0.5151	0.0186421	Right	Forewing	uns	dry	144.604	1.4224	6.5346	0.00653339	NA	NA	NA	NA	103	0.0866882
1808	moore	19-08-06	Ghana	2	moore_8.1	Temp_1	19 C	75 % RH	CY	female	43	16	0.5151	0.0186421	Left	Hindwing	ups	dry	157.349	4.3133	17.1254	0.00842434	NA	NA	NA	NA	103	0.0907676
789	moore	19-08-07	Ghana	2	moore_8.1	Temp_1	19 C	75 % RH	CY	male	44	17	0.6173	0.0193514	Left	Forewing	ups	dry	170.79	1.3452	5.2034	0.00313227	NA	NA	NA	NA	103	0.0577999
1966	moore	19-08-07	Ghana	2	moore_8.1	Temp_1	19 C	75 % RH	CY	male	44	17	0.6173	0.0193514	Left	Hindwing	ups	dry	174.414	5.5626	22.046	0.00433235	NA	NA	NA	NA	103	0.0708732
817	moore	19-08-08	Ghana	2	moore_8.1	Temp_1	19 C	75 % RH	CY	male	46	17	0.5177	0.0174556	Right	Forewing	uns	dry	137.628	1.18255	4.5952	0.00436058	NA	NA	NA	NA	103	0.0646423
1857	moore	19-08-08	Ghana	2	moore_8.1	Temp_1	19 C	75 % RH	CY	male	46	17	0.5177	0.0174556	Right	Hindwing	uns	dry	157.835	6.14165	23.6513	0.00658844	NA	NA	NA	NA	103	0.0862221
743	moore	19-08-09	Ghana	2	moore_8.1	Temp_1	19 C	75 % RH	CY	male	46	17	0.5716	0.0180415	Right	Forewing	uns	dry	150.47	1.1521	4.24785	0.00213939	NA	NA	NA	NA	103	0.0507558
2024	moore	19-08-09	Ghana	2	moore_8.1	Temp_1	19 C	75 % RH	CY	male	46	17	0.5716	0.0180415	Right	Hindwing	uns	dry	171.117	6.0846	25.3802	0.00407206	NA	NA	NA	NA	103	0.0638127
697	moore	19-08-11	Ghana	2	moore_8.1	Temp_1	19 C	75 % RH	CY	female	49	17	0.389	0.0148977	Right	Forewing	uns	dry	123.596	1.1844	5.00395	0.0060466	NA	NA	NA	NA	103	0.0826512
1722	moore	19-08-11	Ghana	2	moore_8.1	Temp_1	19 C	75 % RH	CY	female	49	17	0.389	0.0148977	Right	Hindwing	uns	dry	127.406	4.1006	16.482	0.0134436	NA	NA	NA	NA	103	0.117967
888	moore	19-08-12	Ghana	2	moore_8.1	Temp_1	19 C	75 % RH	CY	female	49	17	0.5517	0.0167381	Right	Forewing	uns	dry	177.474	1.7443	7.0844	0.00237523	NA	NA	NA	NA	103	0.0485997
1905	moore	19-08-12	Ghana	2	moore_8.1	Temp_1	19 C	75 % RH	CY	female	49	17	0.5517	0.0167381	Left	Hindwing	ups	dry	183.623	6.2262	24.1234	0.00448252	NA	NA	NA	NA	103	0.0700842
847	moore	19-09-01	Ghana	2	moore_9.1	Temp_1	19 C	75 % RH	CY	female	38	17	0.5979	0.0221697	Left	Forewing	ups	dry	158.811	1.0126	4.5046	0.0033065	NA	NA	NA	NA	103	0.0625529
2035	moore	19-09-01	Ghana	2	moore_9.1	Temp_1	19 C	75 % RH	CY	female	38	17	0.5979	0.0221697	Left	Hindwing	ups	dry	177.768	4.6978	19.9818	0.00411043	NA	NA	NA	NA	103	0.0641823
921	moore	19-09-02	Ghana	2	moore_9.1	Temp_1	19 C	75 % RH	CY	male	38	17	0.517	0.0211209	Right	Forewing	uns	dry	145.599	0.9542	3.1077	0.00269133	NA	NA	NA	NA	103	0.0509842
1984	moore	19-09-02	Ghana	2	moore_9.1	Temp_1	19 C	75 % RH	CY	male	38	17	0.517	0.0211209	Right	Hindwing	uns	dry	161.083	4.30235	15.693	0.00461975	NA	NA	NA	NA	103	0.0686899
979	moore	19-09-03	Ghana	2	moore_9.1	Temp_1	19 C	75 % RH	CY	male	39	16	0.4954	0.0202887	Left	Forewing	ups	dry	137.669	1.16545	4.34085	0.00141863	NA	NA	NA	NA	103	0.0398902
2056	moore	19-09-03	Ghana	2	moore_9.1	Temp_1	19 C	75 % RH	CY	male	39	16	0.4954	0.0202887	Right	Hindwing	uns	dry	154.231	4.81365	18.5723	0.00306615	NA	NA	NA	NA	103	0.0520859
811	moore	19-09-04	Ghana	2	moore_9.1	Temp_1	19 C	75 % RH	CY	male	39	16	0.6084	0.0217269	Right	Forewing	uns	dry	150.988	1.26625	4.4731	0.00259637	NA	NA	NA	NA	103	0.0531877
1933	moore	19-09-04	Ghana	2	moore_9.1	Temp_1	19 C	75 % RH	CY	male	39	16	0.6084	0.0217269	Right	Hindwing	uns	dry	176.456	4.758	17.9961	0.00511444	NA	NA	NA	NA	103	0.0715807
890	moore	19-09-05	Ghana	2	moore_9.1	Temp_1	19 C	75 % RH	CY	male	38	17	0.4932	0.0207917	Left	Forewing	ups	dry	137.499	1.0377	3.68725	0.00199903	NA	NA	NA	NA	103	0.0494704
1920	moore	19-09-05	Ghana	2	moore_9.1	Temp_1	19 C	75 % RH	CY	male	38	17	0.4932	0.0207917	Right	Hindwing	uns	dry	157.563	4.2702	16.1409	0.00535281	NA	NA	NA	NA	103	0.0756087
877	moore	19-09-06	Ghana	2	moore_9.1	Temp_1	19 C	75 % RH	CY	male	40	18	0.6127	0.0212336	Right	Forewing	uns	dry	163.001	1.0816	3.59845	0.00223764	NA	NA	NA	NA	103	0.0455465
1943	moore	19-09-06	Ghana	2	moore_9.1	Temp_1	19 C	75 % RH	CY	male	40	18	0.6127	0.0212336	Left	Hindwing	ups	dry	171.144	4.5696	16.4227	0.00506205	NA	NA	NA	NA	103	0.0747298
963	moore	19-09-07	Ghana	2	moore_9.1	Temp_1	19 C	75 % RH	CY	female	42	16	0.5101	0.019024	Left	Forewing	ups	dry	148.811	1.3735	5.6564	0.0022122	NA	NA	NA	NA	103	0.047034
705	moore	19-09-08	Ghana	2	moore_9.1	Temp_1	19 C	75 % RH	CY	female	43	16	0.4094	0.0172682	Right	Forewing	uns	dry	97.9472	0.8113	3.4239	0.00470487	NA	NA	NA	NA	103	0.0693331
2053	moore	19-09-08	Ghana	2	moore_9.1	Temp_1	19 C	75 % RH	CY	female	43	16	0.4094	0.0172682	Right	Hindwing	uns	dry	102.746	2.383	9.795	0.00624647	NA	NA	NA	NA	103	0.0790346
866	moore	19-19-01	Ghana	2	Temp_19.1	Temp_1	19 C	75 % RH	CY	male	41	17	0.5406	0.0198689	Left	Forewing	ups	dry	146.492	1.14745	4.2304	0.00366906	NA	NA	NA	NA	106	0.0638724
1953	moore	19-19-01	Ghana	2	Temp_19.1	Temp_1	19 C	75 % RH	CY	male	41	17	0.5406	0.0198689	Right	Hindwing	uns	dry	157.098	4.65165	18.9499	0.00586261	NA	NA	NA	NA	106	0.0799328
826	moore	19-19-02	Ghana	2	Temp_19.1	Temp_1	19 C	75 % RH	CY	male	41	17	0.5286	0.0197208	Left	Forewing	ups	dry	152.665	0.99255	3.90395	0.00372331	NA	NA	NA	NA	106	0.0616767
1869	moore	19-19-02	Ghana	2	Temp_19.1	Temp_1	19 C	75 % RH	CY	male	41	17	0.5286	0.0197208	Left	Hindwing	ups	dry	156.4	5.3116	21.9589	0.00702965	NA	NA	NA	NA	106	0.0870715
799	moore	19-19-03	Ghana	2	Temp_19.1	Temp_1	19 C	75 % RH	CY	female	42	16	0.4428	0.0181476	Left	Forewing	ups	dry	157.08	1.419	5.5174	0.00386112	NA	NA	NA	NA	106	0.0657767
1925	moore	19-19-03	Ghana	2	Temp_19.1	Temp_1	19 C	75 % RH	CY	female	42	16	0.4428	0.0181476	Left	Hindwing	ups	dry	161.796	4.9311	19.703	0.00523809	NA	NA	NA	NA	106	0.0733824
900	moore	19-19-04	Ghana	2	Temp_19.1	Temp_1	19 C	75 % RH	CY	female	42	16	0.6346	0.0204606	Right	Forewing	uns	dry	164.862	1.8738	7.5778	0.00287509	NA	NA	NA	NA	106	0.0500552
1985	moore	19-19-04	Ghana	2	Temp_19.1	Temp_1	19 C	75 % RH	CY	female	42	16	0.6346	0.0204606	Right	Hindwing	uns	dry	196.921	5.9211	23.0468	0.00399135	NA	NA	NA	NA	106	0.0645439
1024	moore	19-19-05	Ghana	2	Temp_19.1	Temp_1	19 C	75 % RH	CY	female	44	17	0.5507	0.0186288	Left	Forewing	ups	dry	180.756	1.51925	6.52445	0.000701841	NA	NA	NA	NA	106	NA
2057	moore	19-19-05	Ghana	2	Temp_19.1	Temp_1	19 C	75 % RH	CY	female	44	17	0.5507	0.0186288	Left	Hindwing	ups	dry	185.169	5.49705	22.1374	0.00225163	NA	NA	NA	NA	106	0.0514996
1898	moore	19-19-06	Ghana	2	Temp_19.1	Temp_1	19 C	75 % RH	CY	male	48	17	0.5509	0.0170785	Left	Hindwing	ups	dry	154.567	4.9244	17.0669	0.00684623	NA	NA	NA	NA	106	0.082742
1006	moore	19-19-07	Ghana	2	Temp_19.1	Temp_1	19 C	75 % RH	CY	male	50	18	0.5106	0.0159854	Right	Forewing	uns	dry	145.208	1.4375	5.4698	0.00166142	NA	NA	NA	NA	106	0.0431244
1982	moore	19-19-07	Ghana	2	Temp_19.1	Temp_1	19 C	75 % RH	CY	male	50	18	0.5106	0.0159854	Right	Hindwing	uns	dry	157.866	4.854	20.3704	0.00366029	NA	NA	NA	NA	106	0.0633467
968	moore	19-21-02	Ghana	2	Temp_21.1	Temp_1	19 C	75 % RH	CY	male	45	18	0.4956	0.0175859	Left	Forewing	ups	dry	144.768	1.24225	5.04345	0.0019958	NA	NA	NA	NA	106	0.0486536
1952	moore	19-21-02	Ghana	2	Temp_21.1	Temp_1	19 C	75 % RH	CY	male	45	18	0.4956	0.0175859	Right	Hindwing	uns	dry	147.167	1.80595	9.17545	0.00565851	NA	NA	NA	NA	106	0.0758894
850	moore	19-21-03	Ghana	2	Temp_21.1	Temp_1	19 C	75 % RH	CY	female	44	17	0.5211	0.0182889	Right	Forewing	uns	dry	154.581	1.49885	6.07995	0.00255496	NA	NA	NA	NA	106	0.0490798
1891	moore	19-21-03	Ghana	2	Temp_21.1	Temp_1	19 C	75 % RH	CY	female	44	17	0.5211	0.0182889	Left	Hindwing	ups	dry	172.706	5.2625	20.8418	0.00595843	NA	NA	NA	NA	106	0.0770932
986	moore	19-21-04	Ghana	2	Temp_21.1	Temp_1	19 C	75 % RH	CY	male	46	17	0.3573	0.015426	Left	Forewing	ups	dry	119.056	1.03385	4.05875	0.00209393	NA	NA	NA	NA	106	0.0466843
2061	moore	19-21-04	Ghana	2	Temp_21.1	Temp_1	19 C	75 % RH	CY	male	46	17	0.3573	0.015426	Left	Hindwing	ups	dry	129.091	3.4763	14.6858	0.00278739	NA	NA	NA	NA	106	0.0576706
994	moore	19-21-07	Ghana	2	Temp_21.1	Temp_1	19 C	75 % RH	CY	male	46	17	0.4353	0.0164755	Right	Forewing	uns	dry	145.07	1.0239	4.1276	0.00117215	NA	NA	NA	NA	106	0.0335887
2074	moore	19-21-07	Ghana	2	Temp_21.1	Temp_1	19 C	75 % RH	CY	male	46	17	0.4353	0.0164755	Right	Hindwing	uns	dry	148.552	5.41305	22.7015	0.00173916	NA	NA	NA	NA	106	0.0447297
991	moore	19-21-08	Ghana	2	Temp_21.1	Temp_1	19 C	75 % RH	CY	male	45	18	0.5173	0.0178389	Right	Forewing	uns	dry	143.231	1.34205	5.0708	0.00156291	NA	NA	NA	NA	106	0.0428239
2083	moore	19-21-08	Ghana	2	Temp_21.1	Temp_1	19 C	75 % RH	CY	male	45	18	0.5173	0.0178389	Right	Hindwing	uns	dry	147.018	4.5962	21.2898	0.00185315	NA	NA	NA	NA	106	0.041749
992	moore	19-21-09	Ghana	2	Temp_21.1	Temp_1	19 C	75 % RH	CY	male	46	17	0.489	0.0171269	Left	Forewing	ups	dry	151.203	1.38035	5.3002	0.00150395	NA	NA	NA	NA	106	0.0388857
2019	moore	19-21-09	Ghana	2	Temp_21.1	Temp_1	19 C	75 % RH	CY	male	46	17	0.489	0.0171269	Left	Hindwing	ups	dry	156.873	4.86205	23.5402	0.00382068	NA	NA	NA	NA	106	0.0645316
916	moore	19-21-10	Ghana	2	Temp_21.1	Temp_1	19 C	75 % RH	CY	female	47	16	0.4375	0.0161521	Right	Forewing	uns	dry	147.2	1.3235	5.5299	0.0028052	NA	NA	NA	NA	106	0.0505692
1976	moore	19-21-10	Ghana	2	Temp_21.1	Temp_1	19 C	75 % RH	CY	female	47	16	0.4375	0.0161521	Left	Hindwing	ups	dry	140.479	5.7378	24.5936	0.00602831	NA	NA	NA	NA	106	0.0769124
873	moore	19-21-11	Ghana	2	Temp_21.1	Temp_1	19 C	75 % RH	CY	male	47	16	0.3784	0.0153893	Left	Forewing	ups	dry	121.445	0.86705	3.64205	0.00312154	NA	NA	NA	NA	106	0.0583056
2030	moore	19-21-11	Ghana	2	Temp_21.1	Temp_1	19 C	75 % RH	CY	male	47	16	0.3784	0.0153893	Right	Hindwing	uns	dry	123.306	4.3086	17.6997	0.00513958	NA	NA	NA	NA	106	0.0695507
932	moore	19-21-12	Ghana	2	Temp_21.1	Temp_1	19 C	75 % RH	CY	female	48	15	0.3984	0.0153296	Left	Forewing	ups	dry	142.1	1.6613	6.2749	0.00212149	NA	NA	NA	NA	106	0.0481677
2065	moore	19-21-12	Ghana	2	Temp_21.1	Temp_1	19 C	75 % RH	CY	female	48	15	0.3984	0.0153296	Left	Hindwing	ups	dry	143.89	5.01975	18.7379	0.00294122	NA	NA	NA	NA	106	0.0560812
987	moore	19-21-13	Ghana	2	Temp_21.1	Temp_1	19 C	75 % RH	CY	female	49	16	NA	NA	Left	Forewing	ups	dry	122.93	0.9847	3.6707	0.00222871	NA	NA	NA	NA	106	0.0480042
2069	moore	19-21-13	Ghana	2	Temp_21.1	Temp_1	19 C	75 % RH	CY	female	49	16	NA	NA	Left	Hindwing	ups	dry	117.024	3.30115	13.3952	0.0036531	NA	NA	NA	NA	106	0.0692379
777	moore	19-21-14	Ghana	2	Temp_21.1	Temp_1	19 C	75 % RH	CY	female	54	NA	NA	NA	Right	Forewing	uns	dry	140.162	1.36295	6.0204	0.00496925	NA	NA	NA	NA	106	0.0703947
1910	moore	19-21-14	Ghana	2	Temp_21.1	Temp_1	19 C	75 % RH	CY	female	54	NA	NA	NA	Left	Hindwing	ups	dry	159.054	4.4302	19.1389	0.00663306	NA	NA	NA	NA	106	0.0805592
775	moore	19-26-01	Ghana	2	Temp_26.1	Temp_1	19 C	75 % RH	CY	female	38	16	0.516	0.0211073	Right	Forewing	uns	dry	148.059	1.2766	5.5056	0.00343409	NA	NA	NA	NA	107	0.0565435
1939	moore	19-26-01	Ghana	2	Temp_26.1	Temp_1	19 C	75 % RH	CY	female	38	16	0.516	0.0211073	Right	Hindwing	uns	dry	153.561	4.9083	20.3133	0.00614448	NA	NA	NA	NA	107	0.0791361
904	moore	19-26-02	Ghana	2	Temp_26.1	Temp_1	19 C	75 % RH	CY	male	37	17	0.4798	0.0211585	Right	Forewing	uns	dry	140.366	1.0572	4.16775	0.00322518	NA	NA	NA	NA	107	0.0583355
2017	moore	19-26-02	Ghana	2	Temp_26.1	Temp_1	19 C	75 % RH	CY	male	37	17	0.4798	0.0211585	Left	Hindwing	ups	dry	152.954	4.29245	17.4067	0.00372525	NA	NA	NA	NA	107	0.0624635
788	moore	19-26-03	Ghana	2	Temp_26.1	Temp_1	19 C	75 % RH	CY	female	38	16	0.4665	0.0204096	Left	Forewing	ups	dry	155.406	1.5599	6.1133	0.00380253	NA	NA	NA	NA	107	0.0628427
1897	moore	19-26-03	Ghana	2	Temp_26.1	Temp_1	19 C	75 % RH	CY	female	38	16	0.4665	0.0204096	Left	Hindwing	ups	dry	160.359	4.1942	17.2682	0.00636427	NA	NA	NA	NA	107	0.0835165
823	moore	19-26-04	Ghana	2	Temp_26.1	Temp_1	19 C	75 % RH	CY	male	40	15	0.6115	0.0212197	Right	Forewing	uns	dry	165.39	1.2375	4.96155	0.0029046	NA	NA	NA	NA	107	0.0568765
1894	moore	19-26-04	Ghana	2	Temp_26.1	Temp_1	19 C	75 % RH	CY	male	40	15	0.6115	0.0212197	Right	Hindwing	uns	dry	169.853	5.87855	23.9711	0.00558011	NA	NA	NA	NA	107	0.0803065
844	moore	19-26-05	Ghana	2	Temp_26.1	Temp_1	19 C	75 % RH	CY	male	41	18	0.5263	0.0196922	Right	Forewing	uns	dry	150.806	1.16505	4.83635	0.00310285	NA	NA	NA	NA	107	0.0571335
1875	moore	19-26-05	Ghana	2	Temp_26.1	Temp_1	19 C	75 % RH	CY	male	41	18	0.5263	0.0196922	Right	Hindwing	uns	dry	166.319	5.5588	22.8378	0.00520053	NA	NA	NA	NA	107	0.0707192
701	moore	19-26-06	Ghana	2	Temp_26.1	Temp_1	19 C	75 % RH	CY	male	41	17	0.5925	0.0204855	Left	Forewing	ups	dry	167.506	1.4254	4.9752	0.00485892	NA	NA	NA	NA	107	0.0687675
1878	moore	19-26-06	Ghana	2	Temp_26.1	Temp_1	19 C	75 % RH	CY	male	41	17	0.5925	0.0204855	Left	Hindwing	ups	dry	176.23	5.09355	19.021	0.00531481	NA	NA	NA	NA	107	0.074984
895	moore	19-26-07	Ghana	2	Temp_26.1	Temp_1	19 C	75 % RH	CY	female	41	16	0.5152	0.0195528	Left	Forewing	ups	dry	159.227	1.78905	7.30925	0.00313608	NA	NA	NA	NA	107	0.0566809
2041	moore	19-26-07	Ghana	2	Temp_26.1	Temp_1	19 C	75 % RH	CY	female	41	16	0.5152	0.0195528	Left	Hindwing	ups	dry	168.403	6.00765	23.2784	0.00388757	NA	NA	NA	NA	107	0.0615135
856	moore	19-26-08	Ghana	2	Temp_26.1	Temp_1	19 C	75 % RH	CY	male	41	16	0.5332	0.0197779	Left	Forewing	ups	dry	149.791	1.17915	4.66515	0.00384497	NA	NA	NA	NA	107	0.0652259
1989	moore	19-26-08	Ghana	2	Temp_26.1	Temp_1	19 C	75 % RH	CY	male	41	16	0.5332	0.0197779	Right	Hindwing	uns	dry	155.417	4.8495	19.9412	0.00455901	NA	NA	NA	NA	107	0.074442
908	moore	19-35-01	Ghana	2	moore_35.1	Temp_1	19 C	75 % RH	CY	male	38	17	0.4748	0.0205299	Left	Forewing	ups	dry	144.656	1.27355	5.25225	0.00299146	NA	NA	NA	NA	109	0.0555228
2033	moore	19-35-01	Ghana	2	moore_35.1	Temp_1	19 C	75 % RH	CY	male	38	17	0.4748	0.0205299	Right	Hindwing	uns	dry	155.863	4.32745	18.5145	0.00339641	NA	NA	NA	NA	109	0.0626476
679	moore	19-35-02	Ghana	2	moore_35.1	Temp_1	19 C	75 % RH	CY	female	39	17	0.6547	0.0222647	Left	Forewing	ups	dry	187.584	1.4728	6.05105	0.00279638	NA	NA	NA	NA	109	0.0572171
2034	moore	19-35-02	Ghana	2	moore_35.1	Temp_1	19 C	75 % RH	CY	female	39	17	0.6547	0.0222647	Right	Hindwing	uns	dry	196.304	6.1852	25.1287	0.00372364	NA	NA	NA	NA	109	0.0572445
810	moore	19-35-03	Ghana	2	moore_35.1	Temp_1	19 C	75 % RH	CY	male	40	18	0.5747	0.0207852	Left	Forewing	ups	dry	170.671	1.2305	4.1514	0.00318973	NA	NA	NA	NA	109	0.0513392
1988	moore	19-35-03	Ghana	2	moore_35.1	Temp_1	19 C	75 % RH	CY	male	40	18	0.5747	0.0207852	Right	Hindwing	uns	dry	174.07	5.1922	19.0141	0.00415777	NA	NA	NA	NA	109	0.0641532
1734	moore	19-35-04	Ghana	2	moore_35.1	Temp_1	19 C	75 % RH	CY	male	41	17	0.4196	0.0182597	Right	Hindwing	uns	dry	119.698	4.05535	15.86	0.0125538	NA	NA	NA	NA	109	0.108275
935	moore	19-35-05	Ghana	2	moore_35.1	Temp_1	19 C	75 % RH	CY	male	41	NA	0.5573	0.0200715	Left	Forewing	ups	dry	144.643	1.20785	4.236	0.00261434	NA	NA	NA	NA	109	0.0521043
1882	moore	19-35-05	Ghana	2	moore_35.1	Temp_1	19 C	75 % RH	CY	male	41	NA	0.5573	0.0200715	Left	Hindwing	ups	dry	159.022	4.47225	17.3525	0.00737495	NA	NA	NA	NA	109	0.0878036
1012	moore	19-35-07	Ghana	2	moore_35.1	Temp_1	19 C	75 % RH	CY	female	47	16	0.4917	0.0167933	Right	Forewing	uns	dry	148.048	1.53205	6.2506	0.000846607	NA	NA	NA	NA	109	0.029555
2085	moore	19-35-07	Ghana	2	moore_35.1	Temp_1	19 C	75 % RH	CY	female	47	16	0.4917	0.0167933	Right	Hindwing	uns	dry	155.938	4.81465	18.8357	0.00148087	NA	NA	NA	NA	109	0.0360065
981	moore	19-35-08	Ghana	2	moore_35.1	Temp_1	19 C	75 % RH	CY	female	46	16	0.3731	0.0156501	Left	Forewing	ups	dry	136.184	1.3676	5.4553	0.00215298	NA	NA	NA	NA	109	0.0464002
2076	moore	19-35-08	Ghana	2	moore_35.1	Temp_1	19 C	75 % RH	CY	female	46	16	0.3731	0.0156501	Right	Hindwing	uns	dry	142.015	4.55015	19.1058	0.00276494	NA	NA	NA	NA	109	0.0538443
787	moore	19-43-01	Ghana	2	moore_43.1	Temp_1	19 C	75 % RH	CY	male	40	18	0.6683	0.0218573	Right	Forewing	uns	dry	185.985	1.644	5.9263	0.00246097	NA	NA	NA	NA	111	0.0507337
1838	moore	19-43-01	Ghana	2	moore_43.1	Temp_1	19 C	75 % RH	CY	male	40	18	0.6683	0.0218573	Right	Hindwing	uns	dry	208.308	6.4698	22.3931	0.00498877	NA	NA	NA	NA	111	0.0745391
782	moore	19-43-02	Ghana	2	moore_43.1	Temp_1	19 C	75 % RH	CY	male	42	16	0.5217	0.0191672	Left	Forewing	ups	dry	150.455	1.00575	3.95805	0.00404469	NA	NA	NA	NA	111	0.0673247
1892	moore	19-43-02	Ghana	2	moore_43.1	Temp_1	19 C	75 % RH	CY	male	42	16	0.5217	0.0191672	Left	Hindwing	ups	dry	160.683	4.31215	18.5394	0.00568645	NA	NA	NA	NA	111	0.0829997
939	moore	19-43-03	Ghana	2	moore_43.1	Temp_1	19 C	75 % RH	CY	female	42	16	0.5384	0.0193695	Right	Forewing	uns	dry	163.474	1.1929	5.2971	0.00216783	NA	NA	NA	NA	111	0.0471952
1896	moore	19-43-03	Ghana	2	moore_43.1	Temp_1	19 C	75 % RH	CY	female	42	16	0.5384	0.0193695	Right	Hindwing	uns	dry	173.764	5.3704	20.7627	0.00618409	NA	NA	NA	NA	111	0.0766476
937	moore	19-43-04	Ghana	2	moore_43.1	Temp_1	19 C	75 % RH	CY	female	43	15	0.588	0.0194831	Left	Forewing	ups	dry	174.885	1.5499	6.4423	0.00223245	NA	NA	NA	NA	111	0.0489281
1981	moore	19-43-04	Ghana	2	moore_43.1	Temp_1	19 C	75 % RH	CY	female	43	15	0.588	0.0194831	Right	Hindwing	uns	dry	189.394	5.951	22.2653	0.00424432	NA	NA	NA	NA	111	0.0680561
756	moore	19-43-05	Ghana	2	moore_43.1	Temp_1	19 C	75 % RH	CY	female	43	17	0.4889	0.0183205	Left	Forewing	ups	dry	144.998	1.23325	5.15935	0.00444378	NA	NA	NA	NA	111	0.0647266
1880	moore	19-43-05	Ghana	2	moore_43.1	Temp_1	19 C	75 % RH	CY	female	43	17	0.4889	0.0183205	Right	Hindwing	uns	dry	158.236	4.32085	18.0165	0.00697403	NA	NA	NA	NA	111	0.0819517
767	moore	19-43-07	Ghana	2	moore_43.1	Temp_1	19 C	75 % RH	CY	male	43	17	0.63	0.0199363	Left	Forewing	ups	dry	168.866	1.14845	4.4624	0.0032676	NA	NA	NA	NA	111	0.0603084
1974	moore	19-43-07	Ghana	2	moore_43.1	Temp_1	19 C	75 % RH	CY	male	43	17	0.63	0.0199363	Right	Hindwing	uns	dry	183.303	5.1028	21.6839	0.00463419	NA	NA	NA	NA	111	0.0691297
619	moore	19-43-08	Ghana	2	moore_43.1	Temp_1	19 C	75 % RH	CY	female	43	17	0.5292	0.0188107	Right	Forewing	uns	dry	146.909	1.39125	5.6526	0.00369508	NA	NA	NA	NA	111	0.0604054
1941	moore	19-43-08	Ghana	2	moore_43.1	Temp_1	19 C	75 % RH	CY	female	43	17	0.5292	0.0188107	Right	Hindwing	uns	dry	169.5	5.9291	22.1942	0.00533564	NA	NA	NA	NA	111	0.070399
797	moore	19-43-10	Ghana	2	moore_43.1	Temp_1	19 C	75 % RH	CY	male	43	17	0.6416	0.0200579	Right	Forewing	uns	dry	172.308	1.4543	5.7604	0.00377201	NA	NA	NA	NA	111	0.0623739
1870	moore	19-43-10	Ghana	2	moore_43.1	Temp_1	19 C	75 % RH	CY	male	43	17	0.6416	0.0200579	Left	Hindwing	ups	dry	181.26	4.8848	22.8136	0.00375689	NA	NA	NA	NA	111	0.0646776
903	moore	19-43-11	Ghana	2	moore_43.1	Temp_1	19 C	75 % RH	CY	male	44	16	0.4781	0.0177713	Right	Forewing	uns	dry	155.287	1.3674	4.5737	0.00245711	NA	NA	NA	NA	111	0.0542146
2002	moore	19-43-11	Ghana	2	moore_43.1	Temp_1	19 C	75 % RH	CY	male	44	16	0.4781	0.0177713	Right	Hindwing	uns	dry	160.128	4.861	21.3226	0.00449538	NA	NA	NA	NA	111	0.0706281
696	moore	19-43-12	Ghana	2	moore_43.1	Temp_1	19 C	75 % RH	CY	male	44	16	0.5483	0.0186017	Left	Forewing	ups	dry	160.293	1.41345	5.04475	0.00371898	NA	NA	NA	NA	111	0.0630231
1911	moore	19-43-12	Ghana	2	moore_43.1	Temp_1	19 C	75 % RH	CY	male	44	16	0.5483	0.0186017	Left	Hindwing	ups	dry	157.485	4.35865	21.1241	0.00575368	NA	NA	NA	NA	111	0.0770962
706	moore	19-43-13	Ghana	2	moore_43.1	Temp_1	19 C	75 % RH	CY	female	45	16	0.5354	0.0180446	Right	Forewing	uns	dry	164.249	1.47705	6.08845	0.00471939	NA	NA	NA	NA	111	0.0684725
2058	moore	19-43-13	Ghana	2	moore_43.1	Temp_1	19 C	75 % RH	CY	female	45	16	0.5354	0.0180446	Left	Hindwing	ups	dry	158.385	4.6777	18.6079	0.00247635	NA	NA	NA	NA	111	0.0542505
704	moore	19-43-15	Ghana	2	moore_43.1	Temp_1	19 C	75 % RH	CY	female	45	17	0.6271	0.019021	Left	Forewing	ups	dry	182.167	1.40585	5.53105	0.00285722	NA	NA	NA	NA	111	0.0559584
2040	moore	19-43-15	Ghana	2	moore_43.1	Temp_1	19 C	75 % RH	CY	female	45	17	0.6271	0.019021	Left	Hindwing	ups	dry	193.766	5.4617	20.569	0.00333542	NA	NA	NA	NA	111	0.0584745
997	moore	19-43-16	Ghana	2	moore_43.1	Temp_1	19 C	75 % RH	CY	female	48	NA	0.393	0.0152601	Right	Forewing	uns	dry	127.22	1.00975	4.08645	0.00157378	NA	NA	NA	NA	111	0.0417899
2079	moore	19-43-16	Ghana	2	moore_43.1	Temp_1	19 C	75 % RH	CY	female	48	NA	0.393	0.0152601	Left	Hindwing	ups	dry	129.84	3.2045	13.551	0.00232978	NA	NA	NA	NA	111	0.0482678
729	moore	19-43-18	Ghana	2	moore_43.1	Temp_1	19 C	75 % RH	CY	female	50	NA	0.4709	0.0155599	Left	Forewing	ups	dry	151.351	1.0969	4.9802	0.00397309	NA	NA	NA	NA	111	0.0678407
1827	moore	19-43-18	Ghana	2	moore_43.1	Temp_1	19 C	75 % RH	CY	female	50	NA	0.4709	0.0155599	Left	Hindwing	ups	dry	158.096	5.30445	20.4428	0.00768774	NA	NA	NA	NA	111	0.0918684
2905	hallow	1_21_55	India	1	hallow_3	Temp_HR	21 C	55 % RH	CY	female	26	13	0.4368	0.0291824	Right	Forewing	uns	dry	142.463	NA	4.8256	0.0164274	NA	NA	NA	NA	NA	0.12817
2906	hallow	1_21_55	India	1	hallow_3	Temp_HR	21 C	55 % RH	CY	female	26	13	0.4368	0.0291824	Right	Hindwing	uns	dry	154.636	NA	17.0463	0.02077	NA	NA	NA	NA	NA	0.144118
2915	hallow	10_21_55	India	1	hallow_4	Temp_HR	21 C	55 % RH	CY	female	26	12	0.5022	0.0305717	Right	Forewing	uns	dry	153.228	NA	6.2254	0.0180098	NA	NA	NA	NA	NA	0.134201
2916	hallow	10_21_55	India	1	hallow_4	Temp_HR	21 C	55 % RH	CY	female	26	12	0.5022	0.0305717	Right	Hindwing	uns	dry	155.192	NA	16.2535	0.0308387	NA	NA	NA	NA	NA	0.175609
2925	hallow	11_21_55	India	1	hallow_4	Temp_HR	21 C	55 % RH	CY	male	26	13	0.4668	0.0298357	Right	Forewing	uns	dry	126.098	NA	3.9958	0.0149788	NA	NA	NA	NA	NA	0.122388
2926	hallow	11_21_55	India	1	hallow_4	Temp_HR	21 C	55 % RH	CY	male	26	13	0.4668	0.0298357	Right	Hindwing	uns	dry	145.287	NA	15.4158	0.0175975	NA	NA	NA	NA	NA	0.132656
2935	hallow	12_21_55	India	1	hallow_4	Temp_HR	21 C	55 % RH	CY	male	30	10	0.5055	0.0265533	Right	Forewing	uns	dry	155.917	NA	5.2431	0.00596919	NA	NA	NA	NA	NA	0.0772605
2936	hallow	12_21_55	India	1	hallow_4	Temp_HR	21 C	55 % RH	CY	male	30	10	0.5055	0.0265533	Right	Hindwing	uns	dry	154.648	NA	15.7401	0.0108427	NA	NA	NA	NA	NA	0.104128
2945	hallow	13_21_55	India	1	hallow_4	Temp_HR	21 C	55 % RH	CY	male	35	13	0.4613	0.0220763	Right	Forewing	uns	dry	134.137	NA	5.2651	0.00412414	NA	NA	NA	NA	NA	0.0642194
2946	hallow	13_21_55	India	1	hallow_4	Temp_HR	21 C	55 % RH	CY	male	35	13	0.4613	0.0220763	Right	Hindwing	uns	dry	142.714	NA	16.1027	0.00515225	NA	NA	NA	NA	NA	0.0717792
2955	hallow	14_21_55	India	1	hallow_4	Temp_HR	21 C	55 % RH	CY	female	33	9	0.4389	0.023029	Right	Forewing	uns	dry	142.904	NA	5.1055	0.00432177	NA	NA	NA	NA	NA	0.0657402
2956	hallow	14_21_55	India	1	hallow_4	Temp_HR	21 C	55 % RH	CY	female	33	9	0.4389	0.023029	Right	Hindwing	uns	dry	142.66	NA	17.0946	0.0118933	NA	NA	NA	NA	NA	0.109057
2965	hallow	15_21_55	India	1	hallow_4	Temp_HR	21 C	55 % RH	CY	male	33	12	0.4569	0.0233396	Right	Forewing	uns	dry	143.795	NA	6.1845	0.0052123	NA	NA	NA	NA	NA	0.0721962
2966	hallow	15_21_55	India	1	hallow_4	Temp_HR	21 C	55 % RH	CY	male	33	12	0.4569	0.0233396	Right	Hindwing	uns	dry	146.772	NA	16.8598	0.00688962	NA	NA	NA	NA	NA	0.0830037
2983	hallow	17_21_55	India	1	hallow_3	Temp_HR	21 C	55 % RH	CY	female	35	13	0.3745	0.0205944	Right	Forewing	uns	dry	139.156	NA	5.2846	0.0030685	NA	NA	NA	NA	NA	0.0553941
2984	hallow	17_21_55	India	1	hallow_3	Temp_HR	21 C	55 % RH	CY	female	35	13	0.3745	0.0205944	Right	Hindwing	uns	dry	143.69	NA	13.3667	0.00824416	NA	NA	NA	NA	NA	0.0907974
2993	hallow	18_21_55	India	1	hallow_11	Temp_HR	21 C	55 % RH	CY	female	25	NA	0.4107	0.0297327	Right	Forewing	uns	dry	NA	NA	NA	NA	NA	NA	NA	NA	NA	NA
2994	hallow	18_21_55	India	1	hallow_11	Temp_HR	21 C	55 % RH	CY	female	25	NA	0.4107	0.0297327	Right	Hindwing	uns	dry	NA	NA	NA	NA	NA	NA	NA	NA	NA	NA
3003	hallow	19_21_55	India	1	hallow_11	Temp_HR	21 C	55 % RH	CY	female	25	11	0.3875	0.029162	Right	Forewing	uns	wet	141.099	NA	5.0126	0.0143211	NA	NA	NA	NA	NA	0.119671
3004	hallow	19_21_55	India	1	hallow_11	Temp_HR	21 C	55 % RH	CY	female	25	11	0.3875	0.029162	Right	Hindwing	uns	wet	153.113	NA	17.3859	0.0224417	NA	NA	NA	NA	NA	0.149805
3013	hallow	2_21_55	India	1	hallow_3	Temp_HR	21 C	55 % RH	CY	male	26	13	0.4267	0.0289557	Right	Forewing	NA	dry	136.701	NA	4.6402	0.00776149	NA	NA	NA	NA	NA	0.0880993
3014	hallow	2_21_55	India	1	hallow_3	Temp_HR	21 C	55 % RH	CY	male	26	13	0.4267	0.0289557	Right	Hindwing	NA	dry	145.07	NA	13.6848	0.0129386	NA	NA	NA	NA	NA	0.113748
3023	hallow	20_21_55	India	1	hallow_11	Temp_HR	21 C	55 % RH	CY	male	25	10	0.3705	0.0287291	Right	Forewing	NA	wet	109.001	NA	3.3137	0.0319226	NA	NA	NA	NA	NA	0.178669
3024	hallow	20_21_55	India	1	hallow_11	Temp_HR	21 C	55 % RH	CY	male	25	10	0.3705	0.0287291	Right	Hindwing	NA	wet	117.972	NA	12.4718	0.0677449	NA	NA	NA	NA	NA	0.260278
3033	hallow	21_21_55	India	1	hallow_3	Temp_HR	21 C	55 % RH	CY	male	37	13	0.3905	0.0197548	Right	Forewing	NA	dry	136.302	NA	7.9064	0.00547975	NA	NA	NA	NA	NA	0.0740253
3034	hallow	21_21_55	India	1	hallow_3	Temp_HR	21 C	55 % RH	CY	male	37	13	0.3905	0.0197548	Right	Hindwing	NA	dry	126.185	NA	16.4518	0.00643104	NA	NA	NA	NA	NA	0.0801938
3043	hallow	22_21_55	India	1	hallow_11	Temp_HR	21 C	55 % RH	CY	male	37	NA	0.4502	0.0207141	Right	Forewing	NA	NA	NA	NA	NA	NA	NA	NA	NA	NA	NA	NA
3044	hallow	22_21_55	India	1	hallow_11	Temp_HR	21 C	55 % RH	CY	male	37	NA	0.4502	0.0207141	Right	Hindwing	NA	NA	NA	NA	NA	NA	NA	NA	NA	NA	NA	NA
3053	hallow	23_21_55	India	1	hallow_11	Temp_HR	21 C	55 % RH	CY	male	27	NA	0.2928	0.0245939	Right	Forewing	NA	NA	NA	NA	NA	NA	NA	NA	NA	NA	NA	NA
3054	hallow	23_21_55	India	1	hallow_11	Temp_HR	21 C	55 % RH	CY	male	27	NA	0.2928	0.0245939	Right	Hindwing	NA	NA	NA	NA	NA	NA	NA	NA	NA	NA	NA	NA
3061	hallow	24_21_55	India	1	hallow_11	Temp_HR	21 C	55 % RH	CY	female	27	12	0.4251	0.0278484	Right	Forewing	NA	NA	NA	NA	NA	NA	NA	NA	NA	NA	NA	NA
3062	hallow	24_21_55	India	1	hallow_11	Temp_HR	21 C	55 % RH	CY	female	27	12	0.4251	0.0278484	Right	Hindwing	NA	NA	NA	NA	NA	NA	NA	NA	NA	NA	NA	NA
3069	hallow	25_21_55	India	1	hallow_11	Temp_HR	21 C	55 % RH	CY	female	27	10	0.403	0.0273572	Right	Forewing	NA	dry	NA	NA	NA	NA	NA	NA	NA	NA	NA	NA
3070	hallow	25_21_55	India	1	hallow_11	Temp_HR	21 C	55 % RH	CY	female	27	10	0.403	0.0273572	Right	Hindwing	NA	dry	NA	NA	NA	NA	NA	NA	NA	NA	NA	NA
3077	hallow	26_21_55	India	1	hallow_11	Temp_HR	21 C	55 % RH	CY	male	27	12	0.412	0.0275593	Right	Forewing	NA	dry	130.405	NA	3.393	0.0043572	NA	NA	NA	NA	NA	0.0660091
3078	hallow	26_21_55	India	1	hallow_11	Temp_HR	21 C	55 % RH	CY	male	27	12	0.412	0.0275593	Right	Hindwing	NA	dry	132.128	NA	15.2942	0.00844406	NA	NA	NA	NA	NA	0.0918916
3085	hallow	27_21_55	India	1	hallow_11	Temp_HR	21 C	55 % RH	CY	female	27	10	0.3277	0.0255346	Right	Forewing	NA	wet	NA	NA	NA	NA	NA	NA	NA	NA	NA	NA
3086	hallow	27_21_55	India	1	hallow_11	Temp_HR	21 C	55 % RH	CY	female	27	10	0.3277	0.0255346	Right	Hindwing	NA	wet	NA	NA	NA	NA	NA	NA	NA	NA	NA	NA
3093	hallow	28_21_55	India	1	hallow_18	Temp_HR	21 C	55 % RH	CY	male	24	NA	0.2625	0.0266787	Right	Forewing	NA	NA	NA	NA	NA	NA	NA	NA	NA	NA	NA	NA
3094	hallow	28_21_55	India	1	hallow_18	Temp_HR	21 C	55 % RH	CY	male	24	NA	0.2625	0.0266787	Right	Hindwing	NA	NA	NA	NA	NA	NA	NA	NA	NA	NA	NA	NA
3099	hallow	29_21_55	India	1	hallow_18	Temp_HR	21 C	55 % RH	CY	male	24	NA	0.3813	0.0302142	Right	Forewing	NA	NA	NA	NA	NA	NA	NA	NA	NA	NA	NA	NA
3100	hallow	29_21_55	India	1	hallow_18	Temp_HR	21 C	55 % RH	CY	male	24	NA	0.3813	0.0302142	Right	Hindwing	NA	NA	NA	NA	NA	NA	NA	NA	NA	NA	NA	NA
3107	hallow	3_21_55	India	1	hallow_3	Temp_HR	21 C	55 % RH	CY	male	26	13	0.3918	0.0281437	Right	Forewing	NA	dry	125.111	NA	3.2881	0.00973614	NA	NA	NA	NA	NA	0.0986719
3108	hallow	3_21_55	India	1	hallow_3	Temp_HR	21 C	55 % RH	CY	male	26	13	0.3918	0.0281437	Right	Hindwing	NA	dry	129.875	NA	9.5668	0.034119	NA	NA	NA	NA	NA	0.184713
3115	hallow	30_21_55	India	1	hallow_18	Temp_HR	21 C	55 % RH	CY	male	24	NA	0.3452	0.0292289	Right	Forewing	NA	NA	NA	NA	NA	NA	NA	NA	NA	NA	NA	NA
3116	hallow	30_21_55	India	1	hallow_18	Temp_HR	21 C	55 % RH	CY	male	24	NA	0.3452	0.0292289	Right	Hindwing	NA	NA	NA	NA	NA	NA	NA	NA	NA	NA	NA	NA
3121	hallow	31_21_55	India	1	hallow_11	Temp_HR	21 C	55 % RH	CY	female	27	NA	0.3609	0.0263693	Right	Forewing	NA	NA	NA	NA	NA	NA	NA	NA	NA	NA	NA	NA
3122	hallow	31_21_55	India	1	hallow_11	Temp_HR	21 C	55 % RH	CY	female	27	NA	0.3609	0.0263693	Right	Hindwing	NA	NA	NA	NA	NA	NA	NA	NA	NA	NA	NA	NA
3127	hallow	32_21_55	India	1	hallow_18	Temp_HR	21 C	55 % RH	CY	male	24	14	0.3646	0.0297665	Right	Forewing	NA	wet	107.436	NA	1.6374	0.0221509	NA	NA	NA	NA	NA	0.148832
3128	hallow	32_21_55	India	1	hallow_18	Temp_HR	21 C	55 % RH	CY	male	24	14	0.3646	0.0297665	Right	Hindwing	NA	wet	107.341	NA	8.8029	0.0634187	NA	NA	NA	NA	NA	0.251831
3133	hallow	33_21_55	India	1	hallow_18	Temp_HR	21 C	55 % RH	CY	male	24	14	0.3547	0.0294946	Right	Forewing	NA	wet	101.982	NA	1.2911	0.026232	NA	NA	NA	NA	NA	0.161963
3134	hallow	33_21_55	India	1	hallow_18	Temp_HR	21 C	55 % RH	CY	male	24	14	0.3547	0.0294946	Right	Hindwing	NA	wet	108.112	NA	6.8108	0.0639719	NA	NA	NA	NA	NA	0.252927
3139	hallow	34_21_55	India	1	hallow_18	Temp_HR	21 C	55 % RH	CY	female	24	14	0.3963	0.0306053	Right	Forewing	NA	wet	133.98	NA	2.5731	0.018973	NA	NA	NA	NA	NA	0.137742
3140	hallow	34_21_55	India	1	hallow_18	Temp_HR	21 C	55 % RH	CY	female	24	14	0.3963	0.0306053	Right	Hindwing	NA	wet	132.43	NA	12.1627	0.0672931	NA	NA	NA	NA	NA	0.259409
3145	hallow	35_21_55	India	1	hallow_11	Temp_HR	21 C	55 % RH	CY	male	27	14	0.3231	0.0254145	Right	Forewing	NA	dry	117.273	NA	2.3322	0.0117504	NA	NA	NA	NA	NA	0.108399
3146	hallow	35_21_55	India	1	hallow_11	Temp_HR	21 C	55 % RH	CY	male	27	14	0.3231	0.0254145	Right	Hindwing	NA	dry	114.844	NA	12.1645	0.0629395	NA	NA	NA	NA	NA	0.250877
3151	hallow	36_21_55	India	1	hallow_18	Temp_HR	21 C	55 % RH	CY	female	30	9	0.3418	0.0233061	Right	Forewing	NA	wet	NA	NA	NA	NA	NA	NA	NA	NA	NA	NA
3152	hallow	36_21_55	India	1	hallow_18	Temp_HR	21 C	55 % RH	CY	female	30	9	0.3418	0.0233061	Right	Hindwing	NA	wet	NA	NA	NA	NA	NA	NA	NA	NA	NA	NA
3155	hallow	37_21_55	India	1	hallow_18	Temp_HR	21 C	55 % RH	CY	male	30	10	0.3167	0.022721	Right	Forewing	NA	NA	111.105	NA	2.849	0.0164791	NA	NA	NA	NA	NA	0.128371
3156	hallow	37_21_55	India	1	hallow_18	Temp_HR	21 C	55 % RH	CY	male	30	10	0.3167	0.022721	Right	Hindwing	NA	NA	115.664	NA	10.282	0.0610103	NA	NA	NA	NA	NA	0.247003
3159	hallow	38_21_55	India	1	hallow_18	Temp_HR	21 C	55 % RH	CY	male	30	10	0.3525	0.0235468	Right	Forewing	NA	NA	NA	NA	NA	NA	NA	NA	NA	NA	NA	NA
3160	hallow	38_21_55	India	1	hallow_18	Temp_HR	21 C	55 % RH	CY	male	30	10	0.3525	0.0235468	Right	Hindwing	NA	NA	NA	NA	NA	NA	NA	NA	NA	NA	NA	NA
3163	hallow	39_21_55	India	1	hallow_18	Temp_HR	21 C	55 % RH	CY	male	30	10	0.3525	0.0235468	Right	Forewing	NA	NA	NA	NA	NA	NA	NA	NA	NA	NA	NA	NA
3164	hallow	39_21_55	India	1	hallow_18	Temp_HR	21 C	55 % RH	CY	male	30	10	0.3525	0.0235468	Right	Hindwing	NA	NA	NA	NA	NA	NA	NA	NA	NA	NA	NA	NA
3169	hallow	4_21_55	India	1	hallow_3	Temp_HR	21 C	55 % RH	CY	female	26	12	0.3585	0.0273227	Right	Forewing	NA	dry	120.709	NA	2.8911	0.0164213	NA	NA	NA	NA	NA	0.128146
3170	hallow	4_21_55	India	1	hallow_3	Temp_HR	21 C	55 % RH	CY	female	26	12	0.3585	0.0273227	Right	Hindwing	NA	dry	135.039	NA	12.8447	0.0357392	NA	NA	NA	NA	NA	0.189048
3197	hallow	5_21_55	India	1	hallow_4	Temp_HR	21 C	55 % RH	CY	female	24	15	0.4432	0.0317679	Right	Forewing	NA	dry	150.986	NA	4.8561	0.00702779	NA	NA	NA	NA	NA	0.0838319
3198	hallow	5_21_55	India	1	hallow_4	Temp_HR	21 C	55 % RH	CY	female	24	15	0.4432	0.0317679	Right	Hindwing	NA	dry	152.921	NA	16.8619	0.00246271	NA	NA	NA	NA	NA	0.0496257
3227	hallow	6_21_55	India	1	hallow_3	Temp_HR	21 C	55 % RH	CY	female	27	13	0.466	0.0287143	Right	Forewing	NA	dry	154.363	NA	6.6109	0.00813149	NA	NA	NA	NA	NA	0.0901748
3228	hallow	6_21_55	India	1	hallow_3	Temp_HR	21 C	55 % RH	CY	female	27	13	0.466	0.0287143	Right	Hindwing	NA	dry	169.103	NA	15.9708	0.0141357	NA	NA	NA	NA	NA	0.118894
3243	hallow	7_21_55	India	1	hallow_3	Temp_HR	21 C	55 % RH	CY	male	27	11	0.4004	0.0272982	Right	Forewing	NA	dry	126.89	NA	4.1019	0.00627156	NA	NA	NA	NA	NA	0.0791932
3244	hallow	7_21_55	India	1	hallow_3	Temp_HR	21 C	55 % RH	CY	male	27	11	0.4004	0.0272982	Right	Hindwing	NA	dry	129.288	NA	12.5835	0	NA	NA	NA	NA	NA	0
3261	hallow	9_21_55	India	1	hallow_4	Temp_HR	21 C	55 % RH	CY	female	26	11	0.4952	0.0304289	Right	Forewing	NA	wet	145.723	NA	3.7327	0.0183842	NA	NA	NA	NA	NA	0.135588
3262	hallow	9_21_55	India	1	hallow_4	Temp_HR	21 C	55 % RH	CY	female	26	11	0.4952	0.0304289	Right	Hindwing	NA	wet	145.038	NA	13.8565	0.0669995	NA	NA	NA	NA	NA	0.258843
3273	hallow	11_21_85	India	unk	NA	Temp_HR	21 C	85 % RH	CY	NA	NA	NA	NA	NA	Right	Forewing	uns	NA	103.692	NA	1.1231	0.0416685	NA	NA	NA	NA	NA	0.204129
3274	hallow	11_21_85	India	unk	NA	Temp_HR	21 C	85 % RH	CY	NA	NA	NA	NA	NA	Right	Hindwing	uns	NA	95.7878	NA	7.6053	0.077419	NA	NA	NA	NA	NA	0.278243
3279	hallow	13_21_85	India	unk	NA	Temp_HR	21 C	85 % RH	CY	NA	NA	NA	NA	NA	Right	Forewing	uns	NA	122.705	NA	1.6439	0.0664283	NA	NA	NA	NA	NA	0.257737
3280	hallow	13_21_85	India	unk	NA	Temp_HR	21 C	85 % RH	CY	NA	NA	NA	NA	NA	Right	Hindwing	uns	NA	126.389	NA	9.5042	0.0999382	NA	NA	NA	NA	NA	0.31613
3281	hallow	14_21_85	India	unk	NA	Temp_HR	21 C	85 % RH	CY	NA	NA	NA	NA	NA	Right	Forewing	uns	NA	99.4857	NA	1.6822	0.0548772	NA	NA	NA	NA	NA	0.234259
3282	hallow	14_21_85	India	unk	NA	Temp_HR	21 C	85 % RH	CY	NA	NA	NA	NA	NA	Right	Hindwing	uns	NA	97.1875	NA	10.0244	0.0832844	NA	NA	NA	NA	NA	0.28859
3285	hallow	15_21_85	India	unk	NA	Temp_HR	21 C	85 % RH	CY	NA	NA	NA	NA	NA	Right	Forewing	uns	NA	91.7101	NA	0.9952	0.0397066	NA	NA	NA	NA	NA	0.199265
3286	hallow	15_21_85	India	unk	NA	Temp_HR	21 C	85 % RH	CY	NA	NA	NA	NA	NA	Right	Hindwing	uns	NA	89.7718	NA	5.3354	0.0667582	NA	NA	NA	NA	NA	0.258376
3289	hallow	16_21_85	India	unk	NA	Temp_HR	21 C	85 % RH	CY	NA	NA	NA	NA	NA	Right	Forewing	uns	NA	99.4474	NA	1.2102	0.0474351	NA	NA	NA	NA	NA	0.217796
3290	hallow	16_21_85	India	unk	NA	Temp_HR	21 C	85 % RH	CY	NA	NA	NA	NA	NA	Right	Hindwing	uns	NA	99.0748	NA	7.8475	0.0509423	NA	NA	NA	NA	NA	0.225704
3293	hallow	17_21_85	India	unk	NA	Temp_HR	21 C	85 % RH	CY	NA	NA	NA	NA	NA	Right	Forewing	uns	NA	103.15	NA	0.5058	0.0363353	NA	NA	NA	NA	NA	0.190618
3294	hallow	17_21_85	India	unk	NA	Temp_HR	21 C	85 % RH	CY	NA	NA	NA	NA	NA	Right	Hindwing	uns	NA	103.952	NA	5.9359	0.0660293	NA	NA	NA	NA	NA	0.256962
3297	hallow	18_21_85	India	unk	NA	Temp_HR	21 C	85 % RH	CY	NA	NA	NA	NA	NA	Right	Forewing	uns	NA	114.579	NA	1.7515	0.0307719	NA	NA	NA	NA	NA	0.175419
3298	hallow	18_21_85	India	unk	NA	Temp_HR	21 C	85 % RH	CY	NA	NA	NA	NA	NA	Right	Hindwing	uns	NA	113.41	NA	10.2134	0.0574244	NA	NA	NA	NA	NA	0.239634
3301	hallow	19_21_85	India	unk	NA	Temp_HR	21 C	85 % RH	CY	NA	NA	NA	NA	NA	Right	Forewing	uns	NA	103.368	NA	2.0677	0.0515623	NA	NA	NA	NA	NA	0.227073
3302	hallow	19_21_85	India	unk	NA	Temp_HR	21 C	85 % RH	CY	NA	NA	NA	NA	NA	Right	Hindwing	uns	NA	95.0198	NA	6.5962	0.0951191	NA	NA	NA	NA	NA	0.308414
3305	hallow	2_21_85	India	unk	NA	Temp_HR	21 C	85 % RH	CY	NA	NA	NA	NA	NA	Right	Forewing	NA	NA	123.441	NA	1.824	0.0663151	NA	NA	NA	NA	NA	0.257517
3306	hallow	2_21_85	India	unk	NA	Temp_HR	21 C	85 % RH	CY	NA	NA	NA	NA	NA	Right	Hindwing	NA	NA	127.968	NA	7.5469	0.0621884	NA	NA	NA	NA	NA	0.249376
3309	hallow	20_21_85	India	unk	NA	Temp_HR	21 C	85 % RH	CY	NA	NA	NA	NA	NA	Right	Forewing	NA	NA	113.333	NA	2.6406	0.0405027	NA	NA	NA	NA	NA	0.201253
3310	hallow	20_21_85	India	unk	NA	Temp_HR	21 C	85 % RH	CY	NA	NA	NA	NA	NA	Right	Hindwing	NA	NA	113.821	NA	8.6649	0.0762498	NA	NA	NA	NA	NA	0.276134
3311	hallow	21_21_85	India	unk	NA	Temp_HR	21 C	85 % RH	CY	NA	NA	NA	NA	NA	Right	Forewing	NA	NA	112.427	NA	2.0781	0.038182	NA	NA	NA	NA	NA	0.195402
3312	hallow	21_21_85	India	unk	NA	Temp_HR	21 C	85 % RH	CY	NA	NA	NA	NA	NA	Right	Hindwing	NA	NA	111.471	NA	8.4736	0.0742012	NA	NA	NA	NA	NA	0.272399
3313	hallow	22_21_85	India	unk	NA	Temp_HR	21 C	85 % RH	CY	NA	NA	NA	NA	NA	Right	Forewing	NA	NA	113.657	NA	1.5542	0.0325189	NA	NA	NA	NA	NA	0.18033
3314	hallow	22_21_85	India	unk	NA	Temp_HR	21 C	85 % RH	CY	NA	NA	NA	NA	NA	Right	Hindwing	NA	NA	119.799	NA	9.848	0.069327	NA	NA	NA	NA	NA	0.2633
3315	hallow	23_21_85	India	unk	NA	Temp_HR	21 C	85 % RH	CY	NA	NA	NA	NA	NA	Right	Forewing	NA	NA	112.866	NA	2.3929	0.0282841	NA	NA	NA	NA	NA	0.168179
3316	hallow	23_21_85	India	unk	NA	Temp_HR	21 C	85 % RH	CY	NA	NA	NA	NA	NA	Right	Hindwing	NA	NA	109.638	NA	9.1826	0.0527491	NA	NA	NA	NA	NA	0.229672
3319	hallow	24_21_85	India	unk	NA	Temp_HR	21 C	85 % RH	CY	NA	NA	NA	NA	NA	Right	Forewing	NA	NA	127.527	NA	3.6257	0.0180652	NA	NA	NA	NA	NA	0.134407
3320	hallow	24_21_85	India	unk	NA	Temp_HR	21 C	85 % RH	CY	NA	NA	NA	NA	NA	Right	Hindwing	NA	NA	123.672	NA	11.9809	0.040106	NA	NA	NA	NA	NA	0.200265
3321	hallow	25_21_85	India	unk	NA	Temp_HR	21 C	85 % RH	CY	NA	NA	NA	NA	NA	Right	Forewing	NA	NA	107.472	NA	1.2061	0.0483008	NA	NA	NA	NA	NA	0.219774
3322	hallow	25_21_85	India	unk	NA	Temp_HR	21 C	85 % RH	CY	NA	NA	NA	NA	NA	Right	Hindwing	NA	NA	111.94	NA	6.1104	0.0862866	NA	NA	NA	NA	NA	0.293746
3325	hallow	26_21_85	India	unk	NA	Temp_HR	21 C	85 % RH	CY	NA	NA	NA	NA	NA	Right	Forewing	NA	NA	123.59	NA	2.0554	0.0214347	NA	NA	NA	NA	NA	0.146406
3326	hallow	26_21_85	India	unk	NA	Temp_HR	21 C	85 % RH	CY	NA	NA	NA	NA	NA	Right	Hindwing	NA	NA	117.825	NA	9.2702	0.0534447	NA	NA	NA	NA	NA	0.231181
3329	hallow	27_21_85	India	unk	NA	Temp_HR	21 C	85 % RH	CY	NA	NA	NA	NA	NA	Right	Forewing	NA	NA	111.14	NA	1.4955	0.0491463	NA	NA	NA	NA	NA	0.22169
3330	hallow	27_21_85	India	unk	NA	Temp_HR	21 C	85 % RH	CY	NA	NA	NA	NA	NA	Right	Hindwing	NA	NA	112.941	NA	10.1934	0.0793058	NA	NA	NA	NA	NA	0.281613
3337	hallow	3_21_85	India	unk	NA	Temp_HR	21 C	85 % RH	CY	NA	NA	NA	NA	NA	Right	Forewing	NA	NA	112.641	NA	1.3833	0.0539278	NA	NA	NA	NA	NA	0.232224
3338	hallow	3_21_85	India	unk	NA	Temp_HR	21 C	85 % RH	CY	NA	NA	NA	NA	NA	Right	Hindwing	NA	NA	125.253	NA	9.4785	0.0898746	NA	NA	NA	NA	NA	0.299791
3351	hallow	4_21_85	India	unk	NA	Temp_HR	21 C	85 % RH	CY	NA	NA	NA	NA	NA	Right	Forewing	NA	NA	104.65	NA	2.4853	0.0084568	NA	NA	NA	NA	NA	0.0919609
3352	hallow	4_21_85	India	unk	NA	Temp_HR	21 C	85 % RH	CY	NA	NA	NA	NA	NA	Right	Hindwing	NA	NA	104.65	NA	7.555	0.0173081	NA	NA	NA	NA	NA	0.13156
3353	hallow	5_21_85	India	unk	NA	Temp_HR	21 C	85 % RH	CY	NA	NA	NA	NA	NA	Right	Forewing	NA	NA	93.3481	NA	2.3054	0.00306166	NA	NA	NA	NA	NA	0.0553323
3354	hallow	5_21_85	India	unk	NA	Temp_HR	21 C	85 % RH	CY	NA	NA	NA	NA	NA	Right	Hindwing	NA	NA	81.5484	NA	9.547	0.0124993	NA	NA	NA	NA	NA	0.1118
3355	hallow	6_21_85	India	unk	NA	Temp_HR	21 C	85 % RH	CY	NA	NA	NA	NA	NA	Right	Forewing	NA	NA	96.2595	NA	2.0883	0.0513799	NA	NA	NA	NA	NA	0.226671
3356	hallow	6_21_85	India	unk	NA	Temp_HR	21 C	85 % RH	CY	NA	NA	NA	NA	NA	Right	Hindwing	NA	NA	91.2632	NA	7.7536	0.0727248	NA	NA	NA	NA	NA	0.269675
3359	hallow	7_21_85	India	unk	NA	Temp_HR	21 C	85 % RH	CY	NA	NA	NA	NA	NA	Right	Forewing	NA	NA	99.3062	NA	0.5349	0.0453678	NA	NA	NA	NA	NA	0.212997
3360	hallow	7_21_85	India	unk	NA	Temp_HR	21 C	85 % RH	CY	NA	NA	NA	NA	NA	Right	Hindwing	NA	NA	106.097	NA	6.9234	0.0713336	NA	NA	NA	NA	NA	0.267084
3361	hallow	8_21_85	India	unk	NA	Temp_HR	21 C	85 % RH	CY	NA	NA	NA	NA	NA	Right	Forewing	NA	NA	106.209	NA	1.5698	0.0549887	NA	NA	NA	NA	NA	0.234497
3362	hallow	8_21_85	India	unk	NA	Temp_HR	21 C	85 % RH	CY	NA	NA	NA	NA	NA	Right	Hindwing	NA	NA	115.696	NA	10.3342	0.00411164	NA	NA	NA	NA	NA	0.0641221
3363	hallow	9_21_85	India	unk	NA	Temp_HR	21 C	85 % RH	CY	NA	NA	NA	NA	NA	Right	Forewing	NA	NA	113.799	NA	0.9071	0.0552569	NA	NA	NA	NA	NA	0.235068
3364	hallow	9_21_85	India	unk	NA	Temp_HR	21 C	85 % RH	CY	NA	NA	NA	NA	NA	Right	Hindwing	NA	NA	123.381	NA	10.65	0.104932	NA	NA	NA	NA	NA	0.323932
39	moore	22-01-02	Ghana	3	Temp_1.2	Temp_2	22 C	75 % RH	CY	female	22	9	0.5705	0.0376989	Left	Forewing	ups	wet	155.934	0.59955	1.9596	0.0524658	NA	NA	NA	NA	153	0.237749
1051	moore	22-01-02	Ghana	3	Temp_1.2	Temp_2	22 C	75 % RH	CY	female	22	9	0.5705	0.0376989	Left	Hindwing	ups	wet	153.848	3.67255	13.4226	0.110335	NA	NA	NA	NA	153	0.33507
88	moore	22-01-03	Ghana	3	Temp_1.2	Temp_2	22 C	75 % RH	CY	female	22	11	0.5468	0.0371695	Left	Forewing	ups	wet	153.543	0.614	2.13185	0.0428969	NA	NA	NA	NA	153	0.205253
1057	moore	22-01-03	Ghana	3	Temp_1.2	Temp_2	22 C	75 % RH	CY	female	22	11	0.5468	0.0371695	Left	Hindwing	ups	wet	154.44	4.6732	16.8235	0.110201	NA	NA	NA	NA	153	0.343047
40	moore	22-01-04	Ghana	3	Temp_1.2	Temp_2	22 C	75 % RH	CY	female	22	9	0.501	0.0361013	Left	Forewing	ups	wet	155.039	0.6842	2.44945	0.0321012	NA	NA	NA	NA	153	0.183212
1143	moore	22-01-04	Ghana	3	Temp_1.2	Temp_2	22 C	75 % RH	CY	female	22	9	0.501	0.0361013	Right	Hindwing	uns	wet	162.93	3.9345	13.3702	0.0715599	NA	NA	NA	NA	153	0.263242
41	moore	22-01-05	Ghana	3	Temp_1.2	Temp_2	22 C	75 % RH	CY	female	22	11	0.4782	0.0355452	Left	Forewing	ups	wet	139.498	0.6704	2.855	0.0577508	NA	NA	NA	NA	153	0.237209
1132	moore	22-01-05	Ghana	3	Temp_1.2	Temp_2	22 C	75 % RH	CY	female	22	11	0.4782	0.0355452	Left	Hindwing	ups	wet	136.993	3.60275	14.1616	0.0925305	NA	NA	NA	NA	153	0.30548
783	moore	22-01-06	Ghana	3	Temp_1.2	Temp_2	22 C	75 % RH	CY	female	23	10	0.5084	0.0347009	Left	Forewing	ups	wet	150.195	0.71065	2.24785	0.0283224	NA	NA	NA	NA	153	0.165473
1061	moore	22-01-06	Ghana	3	Temp_1.2	Temp_2	22 C	75 % RH	CY	female	23	10	0.5084	0.0347009	Right	Hindwing	uns	wet	151.06	3.47175	11.9743	0.10651	NA	NA	NA	NA	153	0.335663
28	moore	22-01-07	Ghana	3	Temp_1.2	Temp_2	22 C	75 % RH	CY	female	24	10	0.5418	0.0339679	Left	Forewing	ups	wet	145.922	0.6663	2.818	0.0319513	NA	NA	NA	NA	153	0.178749
1084	moore	22-01-07	Ghana	3	Temp_1.2	Temp_2	22 C	75 % RH	CY	female	24	10	0.5418	0.0339679	Right	Hindwing	uns	wet	149.075	3.63155	12.4	0.0825616	NA	NA	NA	NA	153	0.281276
636	moore	22-01-08	Ghana	3	Temp_1.2	Temp_2	22 C	75 % RH	CY	female	24	10	0.5182	0.0334673	Right	Forewing	uns	wet	154.073	0.73515	2.54245	0.0508481	NA	NA	NA	NA	153	0.223558
1067	moore	22-01-08	Ghana	3	Temp_1.2	Temp_2	22 C	75 % RH	CY	female	24	10	0.5182	0.0334673	Right	Hindwing	uns	wet	157.048	3.5464	11.3023	0.0930412	NA	NA	NA	NA	153	0.305026
633	moore	22-01-11	Ghana	3	Temp_1.2	Temp_2	22 C	75 % RH	CY	female	25	10	0.5052	0.0318577	Right	Forewing	uns	wet	152.01	1.097	3.6062	0.049914	NA	NA	NA	NA	153	0.223414
1060	moore	22-01-11	Ghana	3	Temp_1.2	Temp_2	22 C	75 % RH	CY	female	25	10	0.5052	0.0318577	Right	Hindwing	uns	wet	157.713	4.7367	14.6001	0.0898178	NA	NA	NA	NA	153	0.30807
17	moore	22-01-14	Ghana	3	Temp_1.2	Temp_2	22 C	75 % RH	CY	female	26	10	0.5214	0.0309564	Left	Forewing	ups	wet	163.553	0.88195	3.5609	0.0209567	NA	NA	NA	NA	153	0.146437
1423	moore	22-01-14	Ghana	3	Temp_1.2	Temp_2	22 C	75 % RH	CY	female	26	10	0.5214	0.0309564	Left	Hindwing	ups	wet	167.934	3.9841	16.0502	0.0468489	NA	NA	NA	NA	153	0.215756
11	moore	22-01-15	Ghana	3	Temp_1.2	Temp_2	22 C	75 % RH	CY	female	27	10	0.5446	0.0302456	Right	Forewing	uns	wet	165.171	0.85265	3.27	0.0307659	NA	NA	NA	NA	153	0.175095
1273	moore	22-01-15	Ghana	3	Temp_1.2	Temp_2	22 C	75 % RH	CY	female	27	10	0.5446	0.0302456	Right	Hindwing	uns	wet	166.695	4.36135	15.8419	0.0560523	NA	NA	NA	NA	153	0.241883
9	moore	22-01-16	Ghana	3	Temp_1.2	Temp_2	22 C	75 % RH	CY	female	28	9	0.4154	0.026648	Right	Forewing	uns	wet	128.288	0.70025	2.50735	0.0546385	NA	NA	NA	NA	153	0.232873
1230	moore	22-01-16	Ghana	3	Temp_1.2	Temp_2	22 C	75 % RH	CY	female	28	9	0.4154	0.026648	Left	Hindwing	ups	wet	114.787	3.4148	12.0625	0.0654466	NA	NA	NA	NA	153	0.27124
42	moore	22-02-02	Ghana	3	Temp_2.2	Temp_2	22 C	75 % RH	CY	male	21	9	0.4618	0.0368071	Right	Forewing	uns	wet	114.446	0.3069	0.86965	0.0509737	NA	NA	NA	NA	153	0.230719
1285	moore	22-02-02	Ghana	3	Temp_2.2	Temp_2	22 C	75 % RH	CY	male	21	9	0.4618	0.0368071	Right	Hindwing	uns	wet	106.807	3.10845	10.3318	0.0805701	NA	NA	NA	NA	153	0.27851
43	moore	22-02-04	Ghana	3	Temp_2.2	Temp_2	22 C	75 % RH	CY	male	22	11	0.5006	0.0360917	Right	Forewing	uns	wet	129.756	0.2349	0.5694	0.0548512	NA	NA	NA	NA	153	0.241268
1111	moore	22-02-04	Ghana	3	Temp_2.2	Temp_2	22 C	75 % RH	CY	male	22	11	0.5006	0.0360917	Left	Hindwing	ups	wet	132.335	3.0339	10.7887	0.0945214	NA	NA	NA	NA	153	0.321663
7	moore	22-02-05	Ghana	3	Temp_2.2	Temp_2	22 C	75 % RH	CY	male	23	10	0.4047	0.03216	Right	Forewing	uns	wet	98.4854	0.2343	0.59985	0.0442162	NA	NA	NA	NA	153	0.200589
1528	moore	22-02-05	Ghana	3	Temp_2.2	Temp_2	22 C	75 % RH	CY	male	23	10	0.4047	0.03216	Right	Hindwing	uns	wet	106.143	2.34795	8.1469	0.0549257	NA	NA	NA	NA	153	0.243649
86	moore	22-02-06	Ghana	3	Temp_2.2	Temp_2	22 C	75 % RH	CY	male	23	11	0.4236	0.0326531	Left	Forewing	ups	wet	114.533	0.32555	0.96975	0.0467386	NA	NA	NA	NA	153	0.221486
1290	moore	22-02-06	Ghana	3	Temp_2.2	Temp_2	22 C	75 % RH	CY	male	23	11	0.4236	0.0326531	Right	Hindwing	uns	wet	109.39	2.88125	9.331	0.0757112	NA	NA	NA	NA	153	0.275779
35	moore	22-02-07	Ghana	3	Temp_2.2	Temp_2	22 C	75 % RH	CY	female	23	10	0.4041	0.0321441	Left	Forewing	ups	wet	126.552	0.6383	2.2912	0.0588261	NA	NA	NA	NA	153	0.243425
1118	moore	22-02-07	Ghana	3	Temp_2.2	Temp_2	22 C	75 % RH	CY	female	23	10	0.4041	0.0321441	Left	Hindwing	ups	wet	131.484	3.28795	10.5013	0.0943397	NA	NA	NA	NA	153	0.310516
36	moore	22-02-08	Ghana	3	Temp_2.2	Temp_2	22 C	75 % RH	CY	female	24	10	0.3824	0.0302432	Left	Forewing	ups	wet	128.822	0.6561	2.6293	0.036374	NA	NA	NA	NA	153	0.189302
1275	moore	22-02-08	Ghana	3	Temp_2.2	Temp_2	22 C	75 % RH	CY	female	24	10	0.3824	0.0302432	Right	Hindwing	uns	wet	126.55	3.2572	12.426	0.0750874	NA	NA	NA	NA	153	0.279387
710	moore	22-02-10	Ghana	3	Temp_2.2	Temp_2	22 C	75 % RH	CY	male	25	11	0.3494	0.0281731	Left	Forewing	ups	wet	108.284	0.4193	1.2386	0.0332288	NA	NA	NA	NA	153	0.17846
1448	moore	22-02-10	Ghana	3	Temp_2.2	Temp_2	22 C	75 % RH	CY	male	25	11	0.3494	0.0281731	Left	Hindwing	ups	wet	108.516	2.6249	9.08615	0.0699182	NA	NA	NA	NA	153	0.263143
5	moore	22-02-11	Ghana	3	Temp_2.2	Temp_2	22 C	75 % RH	CY	female	25	11	0.4793	0.0313037	Right	Forewing	uns	wet	154.819	0.772	2.7108	0.0280625	NA	NA	NA	NA	153	0.164844
1183	moore	22-02-11	Ghana	3	Temp_2.2	Temp_2	22 C	75 % RH	CY	female	25	11	0.4793	0.0313037	Right	Hindwing	uns	wet	151.385	3.56005	12.5477	0.0678066	NA	NA	NA	NA	153	0.268461
18	moore	22-02-12	Ghana	3	Temp_2.2	Temp_2	22 C	75 % RH	CY	female	26	11	0.4272	0.028967	Left	Forewing	ups	int	132.542	0.9116	3.69345	0.0214499	NA	NA	NA	NA	153	0.144364
1469	moore	22-02-12	Ghana	3	Temp_2.2	Temp_2	22 C	75 % RH	CY	female	26	11	0.4272	0.028967	Right	Hindwing	uns	int	133.706	4.2408	14.6779	0.0558255	NA	NA	NA	NA	153	0.236121
602	moore	22-02-13	Ghana	3	Temp_2.2	Temp_2	22 C	75 % RH	CY	female	26	10	0.4285	0.0289964	Left	Forewing	ups	wet	138.393	0.59935	1.9348	0.0595034	NA	NA	NA	NA	153	0.236114
1064	moore	22-02-13	Ghana	3	Temp_2.2	Temp_2	22 C	75 % RH	CY	female	26	10	0.4285	0.0289964	Left	Hindwing	ups	wet	143.535	3.3457	11.2791	0.0987307	NA	NA	NA	NA	153	0.320557
12	moore	22-02-14	Ghana	3	Temp_2.2	Temp_2	22 C	75 % RH	CY	male	27	10	0.3246	0.0254538	Left	Forewing	ups	wet	104.785	0.5036	1.28995	0.0278644	NA	NA	NA	NA	153	0.170108
1592	moore	22-02-14	Ghana	3	Temp_2.2	Temp_2	22 C	75 % RH	CY	male	27	10	0.3246	0.0254538	Right	Hindwing	uns	wet	107.165	2.608	8.755	0.0520144	NA	NA	NA	NA	153	0.227156
4	moore	22-02-15	Ghana	3	Temp_2.2	Temp_2	22 C	75 % RH	CY	female	27	11	0.5324	0.030018	Right	Forewing	uns	wet	148.108	1.1184	4.08915	0.030152	NA	NA	NA	NA	153	0.168742
1160	moore	22-02-15	Ghana	3	Temp_2.2	Temp_2	22 C	75 % RH	CY	female	27	11	0.5324	0.030018	Right	Hindwing	uns	wet	166.893	4.3315	14.1171	0.0583147	NA	NA	NA	NA	153	0.246216
665	moore	22-02-16	Ghana	3	Temp_2.2	Temp_2	22 C	75 % RH	CY	female	28	10	0.352	0.0252168	Right	Forewing	uns	wet	112.125	0.52635	2.0874	0.0485673	NA	NA	NA	NA	153	0.217746
1187	moore	22-02-16	Ghana	3	Temp_2.2	Temp_2	22 C	75 % RH	CY	female	28	10	0.352	0.0252168	Right	Hindwing	uns	wet	117.425	3.46015	11.2447	0.0958902	NA	NA	NA	NA	153	0.309379
8	moore	22-02-17	Ghana	3	Temp_2.2	Temp_2	22 C	75 % RH	CY	female	29	11	0.4711	0.0268312	Left	Forewing	ups	wet	146.953	0.9459	3.29555	0.0303708	NA	NA	NA	NA	153	0.17935
1300	moore	22-02-17	Ghana	3	Temp_2.2	Temp_2	22 C	75 % RH	CY	female	29	11	0.4711	0.0268312	Right	Hindwing	uns	wet	150.898	3.065	11.045	0.0534461	NA	NA	NA	NA	153	0.233852
428	moore	22-03-01	Ghana	2	moore_3.1	Temp_1	22 C	75 % RH	CY	male	NA	NA	NA	NA	Right	Forewing	uns	wet	91.8036	0.09614	0.29175	0.0339175	NA	NA	NA	NA	99	0.188597
1489	moore	22-03-01	Ghana	2	moore_3.1	Temp_1	22 C	75 % RH	CY	male	NA	NA	NA	NA	Right	Hindwing	uns	wet	93.8188	2.0325	6.47745	0.0698029	NA	NA	NA	NA	99	0.263986
70	moore	22-03-02	Ghana	3	moore_3.2	Temp_2	22 C	75 % RH	CY	male	21	10	0.3916	0.0348387	Left	Forewing	ups	wet	105.915	0.42475	1.08755	0.0321477	NA	NA	NA	NA	153	0.182368
1456	moore	22-03-02	Ghana	3	moore_3.2	Temp_2	22 C	75 % RH	CY	male	21	10	0.3916	0.0348387	Right	Hindwing	uns	wet	110.457	2.16165	7.5233	0.0604727	NA	NA	NA	NA	153	0.249143
483	moore	22-03-02a	Ghana	2	moore_3.1	Temp_1	22 C	75 % RH	CY	male	21	8	0.3233	0.0326825	Left	Forewing	ups	wet	81.1461	0.2697	0.5416	0.0420616	NA	NA	NA	NA	99	0.206844
1581	moore	22-03-02a	Ghana	2	moore_3.1	Temp_1	22 C	75 % RH	CY	male	21	8	0.3233	0.0326825	Left	Hindwing	ups	wet	74.1105	2.02315	7.17765	0.0705329	NA	NA	NA	NA	99	0.270167
216	moore	22-03-04	Ghana	2	moore_3.1	Temp_1	22 C	75 % RH	CY	female	23	11	0.3525	0.0307132	Left	Forewing	ups	wet	93.3684	0.21525	0.64715	0.0531313	NA	NA	NA	NA	99	0.242222
1333	moore	22-03-04	Ghana	2	moore_3.1	Temp_1	22 C	75 % RH	CY	female	23	11	0.3525	0.0307132	Right	Hindwing	uns	wet	89.8565	2.51685	7.02975	0.0975658	NA	NA	NA	NA	99	0.311581
547	moore	22-03-05	Ghana	2	moore_3.1	Temp_1	22 C	75 % RH	CY	female	23	11	0.4635	0.0336477	Right	Forewing	uns	wet	137.635	0.6516	2.3933	0.0188745	NA	NA	NA	NA	99	0.139931
1408	moore	22-03-05	Ghana	2	moore_3.1	Temp_1	22 C	75 % RH	CY	female	23	11	0.4635	0.0336477	Left	Hindwing	ups	wet	143.794	3.2065	10.3863	0.0606709	NA	NA	NA	NA	99	0.229309
894	moore	22-03-06	Ghana	3	moore_3.2	Temp_2	22 C	75 % RH	CY	male	23	10	0.3898	0.0317604	Left	Forewing	ups	wet	105.978	0.2619	0.852	0.0533433	NA	NA	NA	NA	153	0.234158
1241	moore	22-03-06	Ghana	3	moore_3.2	Temp_2	22 C	75 % RH	CY	male	23	10	0.3898	0.0317604	Right	Hindwing	uns	wet	105.132	2.56725	9.65805	0.0881281	NA	NA	NA	NA	153	0.294872
400	moore	22-03-06a	Ghana	2	moore_3.1	Temp_1	22 C	75 % RH	CY	male	23	11	0.3355	0.0302113	Left	Forewing	ups	wet	93.9039	0.22345	0.70905	0.0381208	NA	NA	NA	NA	99	0.197725
1365	moore	22-03-06a	Ghana	2	moore_3.1	Temp_1	22 C	75 % RH	CY	male	23	11	0.3355	0.0302113	Left	Hindwing	ups	wet	92.9206	2.40335	7.4423	0.0769747	NA	NA	NA	NA	99	0.28404
59	moore	22-03-07	Ghana	3	moore_3.2	Temp_2	22 C	75 % RH	CY	female	24	9	0.4761	0.0325353	Left	Forewing	ups	wet	144.144	0.68755	2.36085	0.0427479	NA	NA	NA	NA	153	0.209878
1091	moore	22-03-07	Ghana	3	moore_3.2	Temp_2	22 C	75 % RH	CY	female	24	9	0.4761	0.0325353	Right	Hindwing	uns	wet	145.118	3.1936	11.7099	0.0845324	NA	NA	NA	NA	153	0.305504
138	moore	22-03-07a	Ghana	2	moore_3.1	Temp_1	22 C	75 % RH	CY	female	22	NA	0.3862	0.0331015	Left	Forewing	ups	wet	119.601	0.501	1.8295	0.050992	NA	NA	NA	NA	99	0.230193
1198	moore	22-03-07a	Ghana	2	moore_3.1	Temp_1	22 C	75 % RH	CY	female	22	NA	0.3862	0.0331015	Right	Hindwing	uns	wet	115.42	2.8605	10.0197	0.0853012	NA	NA	NA	NA	99	0.289626
410	moore	22-03-08a	Ghana	2	moore_3.1	Temp_1	22 C	75 % RH	CY	female	23	11	0.4502	0.0333227	Left	Forewing	ups	wet	106.237	0.56075	2.1214	0.0311719	NA	NA	NA	NA	99	0.174043
103	moore	22-03-08b	Ghana	3	moore_3.2	Temp_2	22 C	75 % RH	CY	male	24	11	0.4894	0.0328355	Right	Forewing	uns	wet	111.623	0.31975	0.72745	0.0577697	NA	NA	NA	NA	153	0.22858
1233	moore	22-03-08b	Ghana	3	moore_3.2	Temp_2	22 C	75 % RH	CY	male	24	11	0.4894	0.0328355	Right	Hindwing	uns	wet	105.885	3.2835	11.6195	0.090411	NA	NA	NA	NA	153	0.301349
317	moore	22-03-09	Ghana	2	moore_3.1	Temp_1	22 C	75 % RH	CY	female	24	10	0.4605	0.032176	Left	Forewing	ups	wet	123.758	0.575	1.7917	0.0315045	NA	NA	NA	NA	99	0.184753
1219	moore	22-03-09	Ghana	2	moore_3.1	Temp_1	22 C	75 % RH	CY	female	24	10	0.4605	0.032176	Right	Hindwing	uns	wet	126.926	2.81995	9.32545	0.0837076	NA	NA	NA	NA	99	0.284076
768	moore	22-03-10	Ghana	3	moore_3.2	Temp_2	22 C	75 % RH	CY	female	25	10	0.5159	0.032081	Left	Forewing	ups	wet	152.636	0.8077	2.6666	0.0437605	NA	NA	NA	NA	153	0.213465
1092	moore	22-03-10	Ghana	3	moore_3.2	Temp_2	22 C	75 % RH	CY	female	25	10	0.5159	0.032081	Right	Hindwing	uns	wet	156.62	3.65185	13.0408	0.0821175	NA	NA	NA	NA	153	0.285921
161	moore	22-03-10a	Ghana	2	moore_3.1	Temp_1	22 C	75 % RH	CY	female	24	10	0.4744	0.0324965	Right	Forewing	uns	wet	143.125	0.69975	2.4217	0.0359847	NA	NA	NA	NA	99	0.19417
1189	moore	22-03-10a	Ghana	2	moore_3.1	Temp_1	22 C	75 % RH	CY	female	24	10	0.4744	0.0324965	Right	Hindwing	uns	wet	138.164	3.57455	11.6942	0.0774352	NA	NA	NA	NA	99	0.280497
58	moore	22-03-11	Ghana	3	moore_3.2	Temp_2	22 C	75 % RH	CY	female	25	10	0.5262	0.0322931	Left	Forewing	ups	wet	154.279	0.85005	3.3971	0.0590052	NA	NA	NA	NA	153	0.246113
1114	moore	22-03-11	Ghana	3	moore_3.2	Temp_2	22 C	75 % RH	CY	female	25	10	0.5262	0.0322931	Right	Hindwing	uns	wet	152.188	3.9827	13.0919	0.0798173	NA	NA	NA	NA	153	0.280136
490	moore	22-03-11a	Ghana	2	moore_3.1	Temp_1	22 C	75 % RH	CY	male	24	10	0.323	0.0285884	Right	Forewing	uns	wet	96.1453	0.33205	1.0194	0.031589	NA	NA	NA	NA	99	0.172916
1538	moore	22-03-11a	Ghana	2	moore_3.1	Temp_1	22 C	75 % RH	CY	male	24	10	0.323	0.0285884	Left	Hindwing	ups	wet	92.574	1.54075	5.07135	0.0706361	NA	NA	NA	NA	99	0.272302
19	moore	22-03-12	Ghana	3	moore_3.2	Temp_2	22 C	75 % RH	CY	female	26	11	0.5475	0.0314645	Left	Forewing	ups	wet	169.519	1.04925	4.0527	0.0160733	NA	NA	NA	NA	153	0.136869
1152	moore	22-03-12	Ghana	3	moore_3.2	Temp_2	22 C	75 % RH	CY	female	26	11	0.5475	0.0314645	Left	Hindwing	ups	wet	182.6	4.5408	18.3881	0.0624941	NA	NA	NA	NA	153	0.252302
264	moore	22-03-12a	Ghana	2	moore_3.1	Temp_1	22 C	75 % RH	CY	female	24	10	0.4285	0.0314127	Right	Forewing	uns	wet	120.707	0.56225	2.01785	0.0369446	NA	NA	NA	NA	99	0.194381
1075	moore	22-03-12a	Ghana	2	moore_3.1	Temp_1	22 C	75 % RH	CY	female	24	10	0.4285	0.0314127	Right	Hindwing	uns	wet	120.452	3.43015	11.9309	0.117518	NA	NA	NA	NA	99	0.338869
545	moore	22-03-15	Ghana	2	moore_3.1	Temp_1	22 C	75 % RH	CY	male	25	10	0.4367	0.0303474	Right	Forewing	uns	wet	115.689	0.4072	1.4699	0.0244431	NA	NA	NA	NA	99	0.156343
1547	moore	22-03-15	Ghana	2	moore_3.1	Temp_1	22 C	75 % RH	CY	male	25	10	0.4367	0.0303474	Right	Hindwing	uns	wet	118.116	2.3788	8.5046	0.0488783	NA	NA	NA	NA	99	0.228123
378	moore	22-04-01	Ghana	2	moore_4.1	Temp_1	22 C	75 % RH	CY	male	21	12	NA	NA	Left	Forewing	ups	wet	127.083	0.3498	0.7038	0.0284533	NA	NA	NA	NA	100	0.172113
1312	moore	22-04-01	Ghana	2	moore_4.1	Temp_1	22 C	75 % RH	CY	male	21	12	NA	NA	Right	Hindwing	uns	wet	138.65	3.31605	10.9288	0.059708	NA	NA	NA	NA	100	0.246181
74	moore	22-04-01a	Ghana	3	moore_4.2	Temp_2	22 C	75 % RH	CY	male	19	11	0.4944	0.0416172	Right	Forewing	uns	wet	117.618	0.2551	0.9202	0.0494687	NA	NA	NA	NA	153	0.222416
1280	moore	22-04-01a	Ghana	3	moore_4.2	Temp_2	22 C	75 % RH	CY	male	19	11	0.4944	0.0416172	Right	Hindwing	uns	wet	117.913	2.7371	9.7557	0.0660477	NA	NA	NA	NA	153	0.276772
440	moore	22-04-02	Ghana	2	moore_4.1	Temp_1	22 C	75 % RH	CY	male	21	12	NA	NA	Right	Forewing	uns	wet	106.98	0.358	0.8437	0.0292144	NA	NA	NA	NA	100	0.177841
1466	moore	22-04-02	Ghana	2	moore_4.1	Temp_1	22 C	75 % RH	CY	male	21	12	NA	NA	Right	Hindwing	uns	wet	105.962	2.4654	7.59605	0.069159	NA	NA	NA	NA	100	0.259508
72	moore	22-04-02a	Ghana	3	moore_4.2	Temp_2	22 C	75 % RH	CY	male	21	10	0.3968	0.0349922	Left	Forewing	ups	wet	98.5987	0.2691	0.6014	0.0294991	NA	NA	NA	NA	153	0.174148
1622	moore	22-04-02a	Ghana	3	moore_4.2	Temp_2	22 C	75 % RH	CY	male	21	10	0.3968	0.0349922	Right	Hindwing	uns	wet	107.565	1.7799	5.0218	0.0488867	NA	NA	NA	NA	153	0.221103
164	moore	22-04-03	Ghana	2	moore_4.1	Temp_1	22 C	75 % RH	CY	female	23	10	0.625	0.0371734	Right	Forewing	uns	wet	159.376	0.7706	2.8008	0.0356045	NA	NA	NA	NA	100	0.188691
1100	moore	22-04-03	Ghana	2	moore_4.1	Temp_1	22 C	75 % RH	CY	female	23	10	0.625	0.0371734	Left	Hindwing	ups	wet	158.196	4.26973	13.0309	0.092304	NA	NA	NA	NA	100	0.279096
1174	moore	22-04-04	Ghana	2	moore_4.1	Temp_1	22 C	75 % RH	CY	female	23	10	0.5736	0.0361251	Right	Hindwing	uns	wet	142.023	3.03255	10.1701	0.0644086	NA	NA	NA	NA	100	0.249621
63	moore	22-04-04a	Ghana	3	moore_4.2	Temp_2	22 C	75 % RH	CY	male	22	11	0.4509	0.0348555	Right	Forewing	uns	wet	120.635	0.3657	1.07235	0.0371205	NA	NA	NA	NA	153	0.190195
437	moore	22-04-05	Ghana	2	moore_4.1	Temp_1	22 C	75 % RH	CY	male	23	10	0.4265	0.0327274	Left	Forewing	ups	wet	108.112	0.48765	1.56095	0.0315685	NA	NA	NA	NA	100	0.177779
1424	moore	22-04-05	Ghana	2	moore_4.1	Temp_1	22 C	75 % RH	CY	male	23	10	0.4265	0.0327274	Right	Hindwing	uns	wet	113.382	2.5966	8.8932	0.0668356	NA	NA	NA	NA	100	0.252917
579	moore	22-04-06	Ghana	2	moore_4.1	Temp_1	22 C	75 % RH	CY	female	24	9	0.5275	0.0336664	Right	Forewing	uns	wet	145.326	0.8019	2.5264	0.0145916	NA	NA	NA	NA	100	0.123119
1205	moore	22-04-06	Ghana	2	moore_4.1	Temp_1	22 C	75 % RH	CY	female	24	9	0.5275	0.0336664	Left	Hindwing	ups	wet	154.085	4.0624	13.5822	0.0677839	NA	NA	NA	NA	100	0.261015
299	moore	22-04-07	Ghana	2	moore_4.1	Temp_1	22 C	75 % RH	CY	male	22	11	0.5178	0.0365004	Left	Forewing	ups	wet	125.35	0.42575	0.7671	0.0305188	NA	NA	NA	NA	100	0.189
1407	moore	22-04-07	Ghana	2	moore_4.1	Temp_1	22 C	75 % RH	CY	male	22	11	0.5178	0.0365004	Left	Hindwing	ups	wet	124.532	2.3974	7.95735	0.0608275	NA	NA	NA	NA	100	0.247345
254	moore	22-04-08	Ghana	2	moore_4.1	Temp_1	22 C	75 % RH	CY	female	24	10	0.6476	0.0360488	Right	Forewing	uns	wet	165.557	0.9385	3.6195	0.0273183	NA	NA	NA	NA	100	0.170839
1306	moore	22-04-08	Ghana	2	moore_4.1	Temp_1	22 C	75 % RH	CY	female	24	10	0.6476	0.0360488	Left	Hindwing	ups	wet	176.326	4.6164	15.0976	0.0510238	NA	NA	NA	NA	100	0.230294
211	moore	22-04-09	Ghana	2	moore_4.1	Temp_1	22 C	75 % RH	CY	female	24	10	0.4891	0.0328288	Right	Forewing	uns	wet	137.794	0.6774	2.5316	0.0314505	NA	NA	NA	NA	100	0.177343
1341	moore	22-04-09	Ghana	2	moore_4.1	Temp_1	22 C	75 % RH	CY	female	24	10	0.4891	0.0328288	Right	Hindwing	uns	wet	140.331	3.6156	10.6031	0.0647634	NA	NA	NA	NA	100	0.254486
121	moore	22-04-10	Ghana	2	moore_4.1	Temp_1	22 C	75 % RH	CY	female	26	9	0.5459	0.0314339	Left	Forewing	ups	wet	118.105	0.8868	3.41955	0.0576732	NA	NA	NA	NA	100	0.233573
1052	moore	22-04-10	Ghana	2	moore_4.1	Temp_1	22 C	75 % RH	CY	female	26	9	0.5459	0.0314339	Left	Hindwing	ups	wet	143.926	3.4592	12.2451	0.111244	NA	NA	NA	NA	100	0.342955
259	moore	22-04-11	Ghana	2	moore_4.1	Temp_1	22 C	75 % RH	CY	female	26	8	0.547	0.031455	Left	Forewing	ups	wet	155.537	0.78205	2.93025	0.0301291	NA	NA	NA	NA	100	0.175879
1078	moore	22-04-11	Ghana	2	moore_4.1	Temp_1	22 C	75 % RH	CY	female	26	8	0.547	0.031455	Left	Hindwing	ups	wet	161.874	3.7751	13.4932	0.0760628	NA	NA	NA	NA	100	0.278404
166	moore	22-04-12	Ghana	2	moore_4.1	Temp_1	22 C	75 % RH	CY	female	26	9	0.5192	0.0309128	Right	Forewing	uns	wet	152.461	0.88055	3.2742	0.0369401	NA	NA	NA	NA	100	0.189233
1068	moore	22-04-12	Ghana	2	moore_4.1	Temp_1	22 C	75 % RH	CY	female	26	9	0.5192	0.0309128	Right	Hindwing	uns	wet	154.427	4.44065	15.3671	0.0856235	NA	NA	NA	NA	100	0.299977
737	moore	22-05-02	Ghana	3	moore_5.2	Temp_2	22 C	75 % RH	CY	female	21	9	0.4648	0.0368867	Right	Forewing	uns	wet	133.278	0.45085	1.8258	0.0638413	NA	NA	NA	NA	154	0.255766
969	moore	22-05-03	Ghana	3	moore_5.2	Temp_2	22 C	75 % RH	CY	female	22	10	0.4767	0.035508	Left	Forewing	ups	wet	125.32	0.5585	2.3166	0.0664645	NA	NA	NA	NA	154	0.255271
1094	moore	22-05-03	Ghana	3	moore_5.2	Temp_2	22 C	75 % RH	CY	female	22	10	0.4767	0.035508	Right	Hindwing	uns	wet	138.776	4.4675	13.7654	0.0919642	NA	NA	NA	NA	154	0.303256
64	moore	22-05-04	Ghana	3	moore_5.2	Temp_2	22 C	75 % RH	CY	female	22	10	0.5208	0.0365708	Right	Forewing	uns	wet	145.259	0.76785	2.7766	0.0348997	NA	NA	NA	NA	154	0.188743
1096	moore	22-05-04	Ghana	3	moore_5.2	Temp_2	22 C	75 % RH	CY	female	22	10	0.5208	0.0365708	Left	Hindwing	ups	wet	148.908	3.69725	12.1583	0.0809657	NA	NA	NA	NA	154	0.287573
644	moore	22-05-05	Ghana	3	moore_5.2	Temp_2	22 C	75 % RH	CY	female	22	10	0.5	0.0360773	Left	Forewing	ups	wet	137.946	0.8842	3.0697	0.055768	NA	NA	NA	NA	154	0.231242
1074	moore	22-05-05	Ghana	3	moore_5.2	Temp_2	22 C	75 % RH	CY	female	22	10	0.5	0.0360773	Right	Hindwing	uns	wet	134.151	4.4394	16.4717	0.108003	NA	NA	NA	NA	154	0.334956
606	moore	22-05-06	Ghana	3	moore_5.2	Temp_2	22 C	75 % RH	CY	NA	22	10	0.5032	0.0361541	Left	Forewing	ups	wet	144.552	0.47665	1.8192	0.0490142	NA	NA	NA	NA	154	0.220206
1072	moore	22-05-06	Ghana	3	moore_5.2	Temp_2	22 C	75 % RH	CY	NA	22	10	0.5032	0.0361541	Right	Hindwing	uns	wet	142.118	3.94725	13.4232	0.103079	NA	NA	NA	NA	154	0.327121
108	moore	22-05-07	Ghana	3	moore_5.2	Temp_2	22 C	75 % RH	CY	male	23	11	0.4415	0.0331067	Right	Forewing	uns	wet	126.106	0.6035	1.93955	0.0578037	NA	NA	NA	NA	154	0.239672
1131	moore	22-05-07	Ghana	3	moore_5.2	Temp_2	22 C	75 % RH	CY	male	23	11	0.4415	0.0331067	Right	Hindwing	uns	wet	133.25	3.71065	13.0016	0.0855451	NA	NA	NA	NA	154	0.301801
595	moore	22-05-09	Ghana	3	moore_5.2	Temp_2	22 C	75 % RH	CY	female	25	11	0.4895	0.0315242	Right	Forewing	uns	wet	155.079	1.2396	4.7478	0.0324643	NA	NA	NA	NA	154	0.176335
1119	moore	22-05-09	Ghana	3	moore_5.2	Temp_2	22 C	75 % RH	CY	female	25	11	0.4895	0.0315242	Right	Hindwing	uns	wet	158.911	4.7871	17.7634	0.0750841	NA	NA	NA	NA	154	0.278989
588	moore	22-05-13	Ghana	3	moore_5.2	Temp_2	22 C	75 % RH	CY	male	27	12	0.4849	0.0290974	Right	Forewing	uns	wet	125.251	0.6306	2.49265	0.0378105	NA	NA	NA	NA	154	0.192206
1261	moore	22-05-13	Ghana	3	moore_5.2	Temp_2	22 C	75 % RH	CY	male	27	12	0.4849	0.0290974	Right	Hindwing	uns	wet	136.011	2.9948	9.6242	0.0670218	NA	NA	NA	NA	154	0.261545
1624	moore	22-07-01	Ghana	2	moore_7.1	Temp_1	22 C	75 % RH	CY	male	21	9	0.4854	0.0374237	Right	Hindwing	uns	wet	109.702	2.4727	9.8158	0.046012	NA	NA	NA	NA	103	0.214504
128	moore	22-07-02	Ghana	2	moore_7.1	Temp_1	22 C	75 % RH	CY	female	21	9	0.5736	0.0395655	Left	Forewing	ups	wet	153.531	0.62765	2.36365	0.0429748	NA	NA	NA	NA	103	0.206485
1127	moore	22-07-02	Ghana	2	moore_7.1	Temp_1	22 C	75 % RH	CY	female	21	9	0.5736	0.0395655	Right	Hindwing	uns	wet	155.881	4.2108	12.8661	0.0731499	NA	NA	NA	NA	103	0.275913
116	moore	22-07-03	Ghana	2	moore_7.1	Temp_1	22 C	75 % RH	CY	female	23	9	0.555	0.0357303	Left	Forewing	ups	wet	147.799	0.67795	2.26125	0.0650268	NA	NA	NA	NA	103	0.257621
1056	moore	22-07-03	Ghana	2	moore_7.1	Temp_1	22 C	75 % RH	CY	female	23	9	0.555	0.0357303	Left	Hindwing	ups	wet	151.792	4.1601	13.2709	0.110395	NA	NA	NA	NA	103	0.336733
553	moore	22-07-05	Ghana	2	moore_7.1	Temp_1	22 C	75 % RH	CY	male	33	11	0.2512	0.0191202	Left	Forewing	ups	wet	68.4375	0.40245	1.4187	0.0304973	NA	NA	NA	NA	103	0.176791
1618	moore	22-07-05	Ghana	2	moore_7.1	Temp_1	22 C	75 % RH	CY	male	33	11	0.2512	0.0191202	Left	Hindwing	ups	wet	71.3401	1.59615	6.14765	0.0734947	NA	NA	NA	NA	103	0.27866
371	moore	22-12-01	Ghana	2	Temp_12.1	Temp_1	22 C	75 % RH	CY	male	23	9	0.5288	0.035159	Right	Forewing	uns	wet	122.78	0.37045	0.9899	0.0305041	NA	NA	NA	NA	104	0.172355
1568	moore	22-12-01	Ghana	2	Temp_12.1	Temp_1	22 C	75 % RH	CY	male	23	9	0.5288	0.035159	Left	Hindwing	ups	wet	127.886	2.6902	8.9155	0.0438438	NA	NA	NA	NA	104	0.213311
261	moore	22-12-02	Ghana	2	Temp_12.1	Temp_1	22 C	75 % RH	CY	male	23	10	0.5103	0.0347441	Left	Forewing	ups	wet	120.537	0.36015	0.99365	0.0361662	NA	NA	NA	NA	104	0.198159
1351	moore	22-12-02	Ghana	2	Temp_12.1	Temp_1	22 C	75 % RH	CY	male	23	10	0.5103	0.0347441	Right	Hindwing	uns	wet	127.381	2.33675	7.9572	0.0647034	NA	NA	NA	NA	104	0.255216
120	moore	22-12-03	Ghana	2	Temp_12.1	Temp_1	22 C	75 % RH	CY	female	24	9	0.5505	0.0341487	Right	Forewing	uns	wet	144.205	0.59115	1.88755	0.0559043	NA	NA	NA	NA	104	0.233334
1054	moore	22-12-03	Ghana	2	Temp_12.1	Temp_1	22 C	75 % RH	CY	female	24	9	0.5505	0.0341487	Right	Hindwing	uns	wet	149.924	3.79275	11.9629	0.113944	NA	NA	NA	NA	104	0.345594
181	moore	22-12-04	Ghana	2	Temp_12.1	Temp_1	22 C	75 % RH	CY	female	24	9	0.5889	0.034925	Left	Forewing	ups	wet	129.915	0.6098	2.07815	0.0360025	NA	NA	NA	NA	104	0.211096
1088	moore	22-12-04	Ghana	2	Temp_12.1	Temp_1	22 C	75 % RH	CY	female	24	9	0.5889	0.034925	Left	Hindwing	ups	wet	138.058	3.83855	12.5337	0.0986496	NA	NA	NA	NA	104	0.326969
212	moore	22-12-05	Ghana	2	Temp_12.1	Temp_1	22 C	75 % RH	CY	female	24	9	0.4875	0.0327929	Right	Forewing	uns	wet	130.249	0.79785	2.45265	0.0405332	NA	NA	NA	NA	104	0.198194
1070	moore	22-12-05	Ghana	2	Temp_12.1	Temp_1	22 C	75 % RH	CY	female	24	9	0.4875	0.0327929	Right	Hindwing	uns	wet	130.37	3.5622	12.2795	0.110494	NA	NA	NA	NA	104	0.31923
432	moore	22-12-06	Ghana	2	Temp_12.1	Temp_1	22 C	75 % RH	CY	male	24	9	0.5109	0.0333094	Left	Forewing	ups	wet	120.567	0.36975	1.03215	0.0229731	NA	NA	NA	NA	104	0.163389
1473	moore	22-12-06	Ghana	2	Temp_12.1	Temp_1	22 C	75 % RH	CY	male	24	9	0.5109	0.0333094	Left	Hindwing	ups	wet	129.554	2.4145	8.6442	0.0519375	NA	NA	NA	NA	104	0.233849
221	moore	22-12-07	Ghana	2	Temp_12.1	Temp_1	22 C	75 % RH	CY	female	25	10	0.5712	0.0331886	Left	Forewing	ups	wet	145.21	0.91675	3.16445	0.0342007	NA	NA	NA	NA	104	0.189945
1228	moore	22-12-07	Ghana	2	Temp_12.1	Temp_1	22 C	75 % RH	CY	female	25	10	0.5712	0.0331886	Right	Hindwing	uns	wet	157.429	3.8171	14.5808	0.0609866	NA	NA	NA	NA	104	0.250102
287	moore	22-12-08	Ghana	2	Temp_12.1	Temp_1	22 C	75 % RH	CY	female	25	10	0.4988	0.0317226	Right	Forewing	uns	wet	128.926	0.6015	2.3783	0.0336383	NA	NA	NA	NA	104	0.184206
1099	moore	22-12-08	Ghana	2	Temp_12.1	Temp_1	22 C	75 % RH	CY	female	25	10	0.4988	0.0317226	Right	Hindwing	uns	wet	128.192	3.17935	11.6316	0.0948247	NA	NA	NA	NA	104	0.312124
131	moore	22-12-09	Ghana	2	Temp_12.1	Temp_1	22 C	75 % RH	CY	female	26	9	0.5399	0.0313183	Right	Forewing	uns	wet	142.988	0.5716	2.10415	0.0497542	NA	NA	NA	NA	104	0.225794
1089	moore	22-12-09	Ghana	2	Temp_12.1	Temp_1	22 C	75 % RH	CY	female	26	9	0.5399	0.0313183	Left	Hindwing	ups	wet	151.63	3.8461	13.6357	0.089028	NA	NA	NA	NA	104	0.29986
407	moore	22-12-10	Ghana	2	Temp_12.1	Temp_1	22 C	75 % RH	CY	male	26	8	0.5585	0.0316739	Left	Forewing	ups	wet	135.381	0.5035	1.2347	0.0253848	NA	NA	NA	NA	104	0.165214
1418	moore	22-12-10	Ghana	2	Temp_12.1	Temp_1	22 C	75 % RH	CY	male	26	8	0.5585	0.0316739	Left	Hindwing	ups	wet	144.757	3.30965	11.1907	0.04983	NA	NA	NA	NA	104	0.223611
230	moore	22-12-11	Ghana	2	Temp_12.1	Temp_1	22 C	75 % RH	CY	male	26	10	0.5551	0.0316095	Left	Forewing	ups	wet	125.141	0.42515	1.54455	0.0378396	NA	NA	NA	NA	104	0.198654
1249	moore	22-12-11	Ghana	2	Temp_12.1	Temp_1	22 C	75 % RH	CY	male	26	10	0.5551	0.0316095	Left	Hindwing	ups	wet	124.146	2.9333	10.8384	0.075817	NA	NA	NA	NA	104	0.27762
364	moore	22-12-12	Ghana	2	Temp_12.1	Temp_1	22 C	75 % RH	CY	female	NA	NA	NA	NA	Left	Forewing	ups	wet	165.529	1.18815	4.07115	0.023602	NA	NA	NA	NA	104	0.157639
1263	moore	22-12-12	Ghana	2	Temp_12.1	Temp_1	22 C	75 % RH	CY	female	NA	NA	NA	NA	Left	Hindwing	ups	wet	169.383	4.8186	18.0175	0.0626405	NA	NA	NA	NA	104	0.25051
546	moore	22-18-01	Ghana	2	Temp_18.1	Temp_1	22 C	75 % RH	CY	male	25	11	0.349	0.0281623	Right	Forewing	uns	wet	92.1475	0.4502	1.4074	0.0288655	NA	NA	NA	NA	104	0.164066
1652	moore	22-18-01	Ghana	2	Temp_18.1	Temp_1	22 C	75 % RH	CY	male	25	11	0.349	0.0281623	Right	Hindwing	uns	wet	91.3318	2.0226	7.4527	0.0450064	NA	NA	NA	NA	104	0.208859
335	moore	22-18-02	Ghana	2	Temp_18.1	Temp_1	22 C	75 % RH	CY	female	26	10	NA	NA	Right	Forewing	uns	wet	163.286	0.79225	2.69505	0.0238315	NA	NA	NA	NA	104	0.154989
1116	moore	22-18-02	Ghana	2	Temp_18.1	Temp_1	22 C	75 % RH	CY	female	26	10	NA	NA	Left	Hindwing	ups	wet	163.59	4.448	15.3367	0.0770295	NA	NA	NA	NA	104	0.284544
199	moore	22-18-04	Ghana	2	Temp_18.1	Temp_1	22 C	75 % RH	CY	male	26	9	0.3659	0.0275094	Left	Forewing	ups	wet	104.057	0.3557	1.3087	0.0483645	NA	NA	NA	NA	104	0.226337
1301	moore	22-18-04	Ghana	2	Temp_18.1	Temp_1	22 C	75 % RH	CY	male	26	9	0.3659	0.0275094	Left	Hindwing	ups	wet	106.448	2.5824	8.94425	0.0868924	NA	NA	NA	NA	104	0.298424
487	moore	22-18-06	Ghana	2	Temp_18.1	Temp_1	22 C	75 % RH	CY	female	26	9	0.4869	0.030258	Left	Forewing	ups	wet	143.561	0.88765	2.9234	0.0199567	NA	NA	NA	NA	104	0.145317
1102	moore	22-18-06	Ghana	2	Temp_18.1	Temp_1	22 C	75 % RH	CY	female	26	9	0.4869	0.030258	Left	Hindwing	ups	wet	146.073	3.246	11.7363	0.0887946	NA	NA	NA	NA	104	0.302667
331	moore	22-18-07	Ghana	2	Temp_18.1	Temp_1	22 C	75 % RH	CY	female	26	10	0.5113	0.0307552	Right	Forewing	uns	wet	155.46	0.9512	3.27085	0.0271541	NA	NA	NA	NA	104	0.169531
1248	moore	22-18-07	Ghana	2	Temp_18.1	Temp_1	22 C	75 % RH	CY	female	26	10	0.5113	0.0307552	Right	Hindwing	uns	wet	151.867	4.14065	13.9726	0.0643596	NA	NA	NA	NA	104	0.251655
227	moore	22-22-01	Ghana	2	Temp_22.1	Temp_1	22 C	75 % RH	CY	male	19	10	0.4707	0.0409413	Left	Forewing	ups	wet	117.072	0.24585	0.5628	0.0400562	NA	NA	NA	NA	105	0.208456
1401	moore	22-22-01	Ghana	2	Temp_22.1	Temp_1	22 C	75 % RH	CY	male	19	10	0.4707	0.0409413	Left	Hindwing	ups	wet	116.801	2.29285	7.86035	0.062182	NA	NA	NA	NA	105	0.253231
513	moore	22-22-02	Ghana	2	Temp_22.1	Temp_1	22 C	75 % RH	CY	male	20	9	0.3658	0.0357589	Right	Forewing	uns	wet	87.4111	0.25575	0.48685	0.0311748	NA	NA	NA	NA	105	0.182597
1605	moore	22-22-02	Ghana	2	Temp_22.1	Temp_1	22 C	75 % RH	CY	male	20	9	0.3658	0.0357589	Right	Hindwing	uns	wet	86.0629	1.70355	5.75585	0.0550073	NA	NA	NA	NA	105	0.237313
150	moore	22-22-03	Ghana	2	Temp_22.1	Temp_1	22 C	75 % RH	CY	female	21	8	0.4296	0.035931	Right	Forewing	uns	wet	128.608	0.4003	1.34445	0.0464076	NA	NA	NA	NA	105	0.219245
1149	moore	22-22-03	Ghana	2	Temp_22.1	Temp_1	22 C	75 % RH	CY	female	21	8	0.4296	0.035931	Left	Hindwing	ups	wet	131.952	3.5531	11.3194	0.0894116	NA	NA	NA	NA	105	0.301462
130	moore	22-22-04	Ghana	2	Temp_22.1	Temp_1	22 C	75 % RH	CY	male	23	9	0.485	0.0341601	Left	Forewing	ups	wet	113.628	0.2631	0.7216	0.0596915	NA	NA	NA	NA	105	0.245915
1140	moore	22-22-04	Ghana	2	Temp_22.1	Temp_1	22 C	75 % RH	CY	male	23	9	0.485	0.0341601	Left	Hindwing	ups	wet	120.036	2.63255	8.51655	0.0930631	NA	NA	NA	NA	105	0.301552
157	moore	22-22-04(2)	Ghana	2	Temp_22.1	Temp_1	22 C	75 % RH	CY	male	NA	NA	0.453	NA	Left	Forewing	ups	wet	101.652	0.28255	0.6937	0.0525695	NA	NA	NA	NA	105	0.24035
1252	moore	22-22-04(2)	Ghana	2	Temp_22.1	Temp_1	22 C	75 % RH	CY	male	NA	NA	0.453	NA	Left	Hindwing	ups	wet	93.7194	1.96525	6.9639	0.0814949	NA	NA	NA	NA	105	0.294009
172	moore	22-22-05	Ghana	2	Temp_22.1	Temp_1	22 C	75 % RH	CY	male	23	8	0.4197	0.0325526	Right	Forewing	uns	wet	97.7398	0.28895	0.66435	0.0526038	NA	NA	NA	NA	105	0.225829
1316	moore	22-22-05	Ghana	2	Temp_22.1	Temp_1	22 C	75 % RH	CY	male	23	8	0.4197	0.0325526	Right	Hindwing	uns	wet	106.478	2.2102	8.7251	0.0805332	NA	NA	NA	NA	105	0.283784
423	moore	22-22-05(2)	Ghana	2	Temp_22.1	Temp_1	22 C	75 % RH	CY	female	NA	NA	0.4586	NA	Left	Forewing	ups	wet	133.638	0.548	2.2243	0.0260413	NA	NA	NA	NA	105	0.161373
1182	moore	22-22-05(2)	Ghana	2	Temp_22.1	Temp_1	22 C	75 % RH	CY	female	NA	NA	0.4586	NA	Left	Hindwing	ups	wet	137.967	3.3762	11.1247	0.0739497	NA	NA	NA	NA	105	0.268943
178	moore	22-22-06	Ghana	2	Temp_22.1	Temp_1	22 C	75 % RH	CY	female	24	10	0.5244	0.0336003	Left	Forewing	ups	wet	140.923	0.87	2.90425	0.0365478	NA	NA	NA	NA	105	0.195493
1122	moore	22-22-06	Ghana	2	Temp_22.1	Temp_1	22 C	75 % RH	CY	female	24	10	0.5244	0.0336003	Right	Hindwing	uns	wet	150.38	3.74015	12.1776	0.0814038	NA	NA	NA	NA	105	0.287491
139	moore	22-22-07	Ghana	2	Temp_22.1	Temp_1	22 C	75 % RH	CY	female	24	10	0.3654	0.0297882	Left	Forewing	ups	wet	96.9877	0.43585	1.38185	0.0636453	NA	NA	NA	NA	105	0.272968
1101	moore	22-22-07	Ghana	2	Temp_22.1	Temp_1	22 C	75 % RH	CY	female	24	10	0.3654	0.0297882	Right	Hindwing	uns	wet	101.247	2.78315	9.56385	0.122826	NA	NA	NA	NA	105	0.345951
421	moore	22-22-08	Ghana	2	Temp_22.1	Temp_1	22 C	75 % RH	CY	female	24	10	0.4088	0.0309238	Right	Forewing	uns	wet	126.963	0.59485	2.22985	0.025972	NA	NA	NA	NA	105	0.160637
1264	moore	22-22-08	Ghana	2	Temp_22.1	Temp_1	22 C	75 % RH	CY	female	24	10	0.4088	0.0309238	Right	Hindwing	uns	wet	131.031	3.8445	13.2852	0.0677724	NA	NA	NA	NA	105	0.256453
177	moore	22-22-09	Ghana	2	Temp_22.1	Temp_1	22 C	75 % RH	CY	female	24	9	0.5138	0.0333724	Left	Forewing	ups	wet	145.423	0.77545	2.71345	0.0368958	NA	NA	NA	NA	105	0.195853
1203	moore	22-22-09	Ghana	2	Temp_22.1	Temp_1	22 C	75 % RH	CY	female	24	9	0.5138	0.0333724	Left	Hindwing	ups	wet	144.203	4.07315	14.3955	0.0719403	NA	NA	NA	NA	105	0.276661
373	moore	22-22-11	Ghana	2	Temp_22.1	Temp_1	22 C	75 % RH	CY	female	26	10	0.361	0.027386	Right	Forewing	uns	wet	118.531	0.9225	2.95475	0.0297445	NA	NA	NA	NA	105	0.180163
1331	moore	22-22-11	Ghana	2	Temp_22.1	Temp_1	22 C	75 % RH	CY	female	26	10	0.361	0.027386	Right	Hindwing	uns	wet	120.54	2.9996	10.3888	0.069417	NA	NA	NA	NA	105	0.263784
1246	moore	22-22-12	Ghana	2	Temp_22.1	Temp_1	22 C	75 % RH	CY	female	26	10	0.4706	0.0299165	Right	Hindwing	uns	wet	125.188	3.3974	12.2259	0.0761021	NA	NA	NA	NA	105	0.275866
1	moore	22-22-14	Ghana	2	Temp_22.1	Temp_1	22 C	75 % RH	CY	female	NA	NA	NA	NA	Right	Forewing	uns	wet	142.694	0.88855	3.2664	0.0358911	NA	NA	NA	NA	105	0.184064
1415	moore	22-22-14	Ghana	2	Temp_22.1	Temp_1	22 C	75 % RH	CY	female	NA	NA	NA	NA	Right	Hindwing	uns	wet	140.823	4.11595	13.5626	0.0498811	NA	NA	NA	NA	105	0.226158
208	moore	22-22-15	Ghana	2	Temp_22.1	Temp_1	22 C	75 % RH	CY	male	NA	NA	NA	NA	Left	Forewing	ups	wet	116.483	0.4022	1.12585	0.0422077	NA	NA	NA	NA	105	0.209058
1310	moore	22-22-15	Ghana	2	Temp_22.1	Temp_1	22 C	75 % RH	CY	male	NA	NA	NA	NA	Left	Hindwing	ups	wet	125.286	3.30375	10.9893	0.0694919	NA	NA	NA	NA	105	0.263075
369	moore	22-27-01	Ghana	2	Temp_27.1	Temp_1	22 C	75 % RH	CY	male	22	10	0.4173	0.0339672	Right	Forewing	uns	wet	105.43	0.2797	0.8277	0.0377823	NA	NA	NA	NA	107	0.194377
1455	moore	22-27-01	Ghana	2	Temp_27.1	Temp_1	22 C	75 % RH	CY	male	22	10	0.4173	0.0339672	Right	Hindwing	uns	wet	105.518	2.6483	9.7617	0.0596363	NA	NA	NA	NA	107	0.253107
480	moore	22-27-02	Ghana	2	Temp_27.1	Temp_1	22 C	75 % RH	CY	male	24	10	NA	NA	Left	Forewing	ups	wet	96.3564	0.314	0.96395	0.0251876	NA	NA	NA	NA	107	0.165127
1508	moore	22-27-02	Ghana	2	Temp_27.1	Temp_1	22 C	75 % RH	CY	male	24	10	NA	NA	Right	Hindwing	uns	wet	88.6609	2.2211	8.29635	0.0379375	NA	NA	NA	NA	107	0.233521
124	moore	22-27-03	Ghana	2	Temp_27.1	Temp_1	22 C	75 % RH	CY	female	24	10	0.3758	0.0300682	Right	Forewing	uns	wet	118.119	0.47465	1.7862	0.0677096	NA	NA	NA	NA	107	0.261915
1169	moore	22-27-03	Ghana	2	Temp_27.1	Temp_1	22 C	75 % RH	CY	female	24	10	0.3758	0.0300682	Left	Hindwing	ups	wet	109.241	3.59205	13.4362	0.112547	NA	NA	NA	NA	107	0.336862
203	moore	22-27-04	Ghana	2	Temp_27.1	Temp_1	22 C	75 % RH	CY	female	24	9	0.4355	0.0315829	Left	Forewing	ups	wet	135.009	0.538	1.89095	0.0343041	NA	NA	NA	NA	107	0.19273
1134	moore	22-27-04	Ghana	2	Temp_27.1	Temp_1	22 C	75 % RH	CY	female	24	9	0.4355	0.0315829	Left	Hindwing	ups	wet	131.797	3.1865	10.9724	0.0756107	NA	NA	NA	NA	107	0.271927
450	moore	22-27-08	Ghana	2	Temp_27.1	Temp_1	22 C	75 % RH	CY	male	23	9	0.448	0.0332684	Right	Forewing	uns	wet	108.752	0.31775	0.8711	0.0302949	NA	NA	NA	NA	107	0.170955
1533	moore	22-27-08	Ghana	2	Temp_27.1	Temp_1	22 C	75 % RH	CY	male	23	9	0.448	0.0332684	Right	Hindwing	uns	wet	106.101	2.2763	7.91515	0.0566658	NA	NA	NA	NA	107	0.234748
467	moore	22-27-09	Ghana	2	Temp_27.1	Temp_1	22 C	75 % RH	CY	male	23	10	0.429	0.0327912	Right	Forewing	uns	wet	120.192	0.4129	0.98445	0.0246919	NA	NA	NA	NA	107	0.155282
1586	moore	22-27-09	Ghana	2	Temp_27.1	Temp_1	22 C	75 % RH	CY	male	23	10	0.429	0.0327912	Left	Hindwing	ups	wet	122.912	2.6642	8.87625	0.0436955	NA	NA	NA	NA	107	0.218209
268	moore	22-27-10	Ghana	2	Temp_27.1	Temp_1	22 C	75 % RH	CY	female	NA	NA	NA	NA	Left	Forewing	ups	wet	143.428	0.7385	2.4169	0.0295572	NA	NA	NA	NA	107	0.177941
1433	moore	22-27-10	Ghana	2	Temp_27.1	Temp_1	22 C	75 % RH	CY	female	NA	NA	NA	NA	Left	Hindwing	ups	wet	139.444	3.78025	12.3957	0.0554432	NA	NA	NA	NA	107	0.241812
549	moore	22-27-10(2)	Ghana	2	Temp_27.1	Temp_1	22 C	75 % RH	CY	female	NA	NA	NA	NA	Right	Forewing	uns	wet	137.175	0.7376	2.63585	0.0154647	NA	NA	NA	NA	107	0.131561
1357	moore	22-27-10(2)	Ghana	2	Temp_27.1	Temp_1	22 C	75 % RH	CY	female	NA	NA	NA	NA	Left	Hindwing	ups	wet	135.183	3.51475	12.7467	0.0625247	NA	NA	NA	NA	107	0.247332
425	moore	22-27-12	Ghana	2	Temp_27.1	Temp_1	22 C	75 % RH	CY	female	26	9	0.4988	0.0305025	Right	Forewing	uns	wet	150.602	0.8917	3.03765	0.0221791	NA	NA	NA	NA	107	0.153912
1107	moore	22-27-12	Ghana	2	Temp_27.1	Temp_1	22 C	75 % RH	CY	female	26	9	0.4988	0.0305025	Left	Hindwing	ups	wet	155.342	3.7549	13.4135	0.0669638	NA	NA	NA	NA	107	0.262125
472	moore	22-27-13	Ghana	2	Temp_27.1	Temp_1	22 C	75 % RH	CY	NA	27	10	0.4432	0.0282381	Right	Forewing	uns	wet	115.128	0.58255	1.43855	0.0278884	NA	NA	NA	NA	107	0.167887
1584	moore	22-27-13	Ghana	2	Temp_27.1	Temp_1	22 C	75 % RH	CY	NA	27	10	0.4432	0.0282381	Right	Hindwing	uns	wet	125.132	3.02975	10.1969	0.0432537	NA	NA	NA	NA	107	0.208536
673	moore	22-27-15	Ghana	2	Temp_27.1	Temp_1	22 C	75 % RH	CY	female	38	9	0.2814	0.0172448	Left	Forewing	ups	int	95.4767	0.6367	2.70395	0.0117317	NA	NA	NA	NA	107	0.110911
1662	moore	22-27-15	Ghana	2	Temp_27.1	Temp_1	22 C	75 % RH	CY	female	38	9	0.2814	0.0172448	Left	Hindwing	ups	int	99.6469	2.57195	9.137	0.03935	NA	NA	NA	NA	107	0.202576
1327	moore	22-27-16	Ghana	2	Temp_27.1	Temp_1	22 C	75 % RH	CY	female	43	NA	NA	NA	Left	Hindwing	ups	wet	127.148	3.6224	13.6291	0.0581303	NA	NA	NA	NA	107	0.274657
396	moore	22-27-16a	Ghana	2	Temp_27.1	Temp_1	22 C	75 % RH	CY	female	43	NA	NA	NA	Left	Forewing	ups	wet	115.866	0.76535	2.93072	0.0236115	NA	NA	NA	NA	107	0.186884
248	moore	22-36-01	Ghana	2	moore_36.1	Temp_1	22 C	75 % RH	CY	female	22	10	0.5229	0.0366199	Left	Forewing	ups	wet	123.713	0.62185	1.865	0.0381202	NA	NA	NA	NA	108	0.191629
1240	moore	22-36-01	Ghana	2	moore_36.1	Temp_1	22 C	75 % RH	CY	female	22	10	0.5229	0.0366199	Left	Hindwing	ups	wet	128.866	3.4372	11.518	0.0689406	NA	NA	NA	NA	108	0.266417
245	moore	22-36-02	Ghana	2	moore_36.1	Temp_1	22 C	75 % RH	CY	male	23	9	0.416	0.0324566	Right	Forewing	uns	wet	91.1651	0.12425	0.4139	0.0528946	NA	NA	NA	NA	108	0.232674
1225	moore	22-36-02	Ghana	2	moore_36.1	Temp_1	22 C	75 % RH	CY	male	23	9	0.416	0.0324566	Right	Hindwing	uns	wet	89.2703	1.8882	7.04505	0.11166	NA	NA	NA	NA	108	0.33762
119	moore	22-36-03	Ghana	2	moore_36.1	Temp_1	22 C	75 % RH	CY	female	23	9	0.5238	0.0350478	Left	Forewing	ups	wet	138.484	0.66945	2.16505	0.0605672	NA	NA	NA	NA	108	0.237945
1272	moore	22-36-03	Ghana	2	moore_36.1	Temp_1	22 C	75 % RH	CY	female	23	9	0.5238	0.0350478	Left	Hindwing	ups	wet	150.278	3.7943	12.7971	0.0599101	NA	NA	NA	NA	108	0.253166
126	moore	22-36-04	Ghana	2	moore_36.1	Temp_1	22 C	75 % RH	CY	female	23	10	0.4617	0.0336041	Right	Forewing	uns	wet	131.869	0.7178	2.5312	0.0579217	NA	NA	NA	NA	108	0.227543
1066	moore	22-36-04	Ghana	2	moore_36.1	Temp_1	22 C	75 % RH	CY	female	23	10	0.4617	0.0336041	Right	Hindwing	uns	wet	138.907	3.6523	12.4304	0.0925548	NA	NA	NA	NA	108	0.303041
133	moore	22-36-05	Ghana	2	moore_36.1	Temp_1	22 C	75 % RH	CY	female	22	8	0.5326	0.0368449	Right	Forewing	uns	wet	147.844	0.8132	2.6189	0.0453667	NA	NA	NA	NA	108	0.212995
1129	moore	22-36-05	Ghana	2	moore_36.1	Temp_1	22 C	75 % RH	CY	female	22	8	0.5326	0.0368449	Right	Hindwing	uns	wet	142.992	3.2044	10.2301	0.0754014	NA	NA	NA	NA	108	0.263575
570	moore	22-36-06	Ghana	2	moore_36.1	Temp_1	22 C	75 % RH	CY	male	23	10	0.4702	0.0338091	Right	Forewing	uns	wet	110.471	0.28755	0.8878	0.0190952	NA	NA	NA	NA	108	0.144991
1641	moore	22-36-06	Ghana	2	moore_36.1	Temp_1	22 C	75 % RH	CY	male	23	10	0.4702	0.0338091	Left	Hindwing	ups	wet	117.664	2.3829	8.61035	0.0391436	NA	NA	NA	NA	108	0.197853
381	moore	22-36-08	Ghana	2	moore_36.1	Temp_1	22 C	75 % RH	CY	male	23	10	0.417	0.0324826	Left	Forewing	ups	wet	98.7896	0.3313	1.0029	0.0382968	NA	NA	NA	NA	108	0.191416
1632	moore	22-36-08	Ghana	2	moore_36.1	Temp_1	22 C	75 % RH	CY	male	23	10	0.417	0.0324826	Right	Hindwing	uns	wet	107.83	2.03565	7.51925	0.0448496	NA	NA	NA	NA	108	0.219405
241	moore	22-36-09	Ghana	2	moore_36.1	Temp_1	22 C	75 % RH	CY	female	25	9	0.3524	0.0282535	Right	Forewing	uns	wet	110.813	0.5266	2.09555	0.0387046	NA	NA	NA	NA	108	0.193645
1281	moore	22-36-09	Ghana	2	moore_36.1	Temp_1	22 C	75 % RH	CY	female	25	9	0.3524	0.0282535	Right	Hindwing	uns	wet	103.811	2.60695	8.85055	0.0856408	NA	NA	NA	NA	108	0.292427
257	moore	22-36-10	Ghana	2	moore_36.1	Temp_1	22 C	75 % RH	CY	male	26	9	0.4242	0.028899	Right	Forewing	uns	wet	109.069	0.27505	0.6696	0.0417989	NA	NA	NA	NA	108	0.200859
1340	moore	22-36-10	Ghana	2	moore_36.1	Temp_1	22 C	75 % RH	CY	male	26	9	0.4242	0.028899	Right	Hindwing	uns	wet	109.985	2.82555	9.5172	0.0704873	NA	NA	NA	NA	108	0.265104
386	moore	22-36-11	Ghana	2	moore_36.1	Temp_1	22 C	75 % RH	CY	female	26	9	0.3796	0.0278485	Left	Forewing	ups	wet	104.678	0.5931	2.19075	0.0314072	NA	NA	NA	NA	108	0.177962
1155	moore	22-36-11	Ghana	2	moore_36.1	Temp_1	22 C	75 % RH	CY	female	26	9	0.3796	0.0278485	Left	Hindwing	ups	wet	114.04	3.3968	11.7454	0.0917984	NA	NA	NA	NA	108	0.306889
330	moore	22-36-12	Ghana	2	moore_36.1	Temp_1	22 C	75 % RH	CY	female	26	9	0.452	0.029517	Left	Forewing	ups	wet	129.164	0.6683	2.4389	0.0320885	NA	NA	NA	NA	108	0.186993
1161	moore	22-36-12	Ghana	2	moore_36.1	Temp_1	22 C	75 % RH	CY	female	26	9	0.452	0.029517	Right	Hindwing	uns	wet	133.487	3.32385	10.8507	0.0730696	NA	NA	NA	NA	108	0.276744
541	moore	22-36-14	Ghana	2	moore_36.1	Temp_1	22 C	75 % RH	CY	male	NA	NA	NA	NA	Left	Forewing	ups	wet	79.1883	0.1636	0.6186	0.0435026	NA	NA	NA	NA	108	0.208573
1491	moore	22-36-14	Ghana	2	moore_36.1	Temp_1	22 C	75 % RH	CY	male	NA	NA	NA	NA	Right	Hindwing	uns	wet	83.5292	1.7726	5.7868	0.0549788	NA	NA	NA	NA	108	0.247835
171	moore	22-36-15	Ghana	2	moore_36.1	Temp_1	22 C	75 % RH	CY	female	NA	NA	NA	NA	Right	Forewing	uns	wet	108.164	0.49955	2.00345	0.0451505	NA	NA	NA	NA	108	0.211715
1238	moore	22-36-15	Ghana	2	moore_36.1	Temp_1	22 C	75 % RH	CY	female	NA	NA	NA	NA	Right	Hindwing	uns	wet	115.094	3.1507	10.0088	0.0826673	NA	NA	NA	NA	108	0.285589
226	moore	22-36-16	Ghana	2	moore_36.1	Temp_1	22 C	75 % RH	CY	female	NA	NA	NA	NA	Right	Forewing	uns	wet	122.562	0.6934	2.51215	0.0391696	NA	NA	NA	NA	108	0.202727
1171	moore	22-36-16	Ghana	2	moore_36.1	Temp_1	22 C	75 % RH	CY	female	NA	NA	NA	NA	Left	Hindwing	ups	wet	128.368	3.5667	13.0212	0.0753968	NA	NA	NA	NA	108	0.283054
481	moore	22-36-17	Ghana	2	moore_36.1	Temp_1	22 C	75 % RH	CY	female	28	10	0.3612	0.0254346	Left	Forewing	ups	wet	112.638	0.48175	1.79095	0.0245231	NA	NA	NA	NA	108	0.160351
1325	moore	22-36-17	Ghana	2	moore_36.1	Temp_1	22 C	75 % RH	CY	female	28	10	0.3612	0.0254346	Left	Hindwing	ups	wet	111.534	3.1161	10.4673	0.0737798	NA	NA	NA	NA	108	0.270788
251	moore	22-36-20	Ghana	2	moore_36.1	Temp_1	22 C	75 % RH	CY	male	28	10	0.5098	0.0285304	Left	Forewing	ups	wet	111.859	0.3683	1.2935	0.0396379	NA	NA	NA	NA	108	0.193471
1373	moore	22-36-20	Ghana	2	moore_36.1	Temp_1	22 C	75 % RH	CY	male	28	10	0.5098	0.0285304	Left	Hindwing	ups	wet	110.32	3.1042	9.88865	0.0632807	NA	NA	NA	NA	108	0.24598
434	moore	22-44-01	Ghana	2	moore_44.1	Temp_1	22 C	75 % RH	CY	male	NA	NA	NA	NA	Left	Forewing	ups	wet	104.187	0.28425	0.5554	0.0270985	NA	NA	NA	NA	108	0.176249
1565	moore	22-44-01	Ghana	2	moore_44.1	Temp_1	22 C	75 % RH	CY	male	NA	NA	NA	NA	Left	Hindwing	ups	wet	99.1847	2.2174	7.98445	0.0564812	NA	NA	NA	NA	108	0.240396
204	moore	22-44-02	Ghana	2	moore_44.1	Temp_1	22 C	75 % RH	CY	female	25	9	0.5244	0.0322563	Left	Forewing	ups	wet	144.572	0.5932	1.98335	0.034195	NA	NA	NA	NA	108	0.187613
1124	moore	22-44-02	Ghana	2	moore_44.1	Temp_1	22 C	75 % RH	CY	female	25	9	0.5244	0.0322563	Right	Hindwing	uns	wet	146.534	3.1919	11.2143	0.0800427	NA	NA	NA	NA	108	0.282279
253	moore	22-44-03	Ghana	2	moore_44.1	Temp_1	22 C	75 % RH	CY	male	25	10	0.4389	0.0303982	Left	Forewing	ups	wet	107.541	0.34095	0.91485	0.0432453	NA	NA	NA	NA	108	0.209713
1391	moore	22-44-03	Ghana	2	moore_44.1	Temp_1	22 C	75 % RH	CY	male	25	10	0.4389	0.0303982	Right	Hindwing	uns	wet	107.209	2.3985	8.59655	0.0682064	NA	NA	NA	NA	108	0.26559
348	moore	22-44-04	Ghana	2	moore_44.1	Temp_1	22 C	75 % RH	CY	male	25	9	0.4938	0.0316162	Right	Forewing	uns	wet	117.042	0.34005	1.22155	0.0352608	NA	NA	NA	NA	108	0.187555
1554	moore	22-44-04	Ghana	2	moore_44.1	Temp_1	22 C	75 % RH	CY	male	25	9	0.4938	0.0316162	Left	Hindwing	ups	wet	112.769	2.4157	7.7803	0.0574849	NA	NA	NA	NA	108	0.242253
438	moore	22-44-05	Ghana	2	moore_44.1	Temp_1	22 C	75 % RH	CY	female	25	9	0.4224	0.0300124	Left	Forewing	ups	wet	128.191	0.57865	1.9332	0.0236976	NA	NA	NA	NA	108	0.159608
1200	moore	22-44-05	Ghana	2	moore_44.1	Temp_1	22 C	75 % RH	CY	female	25	9	0.4224	0.0300124	Right	Hindwing	uns	wet	126.79	3.13	10.2898	0.0751789	NA	NA	NA	NA	108	0.286446
341	moore	22-44-06	Ghana	2	moore_44.1	Temp_1	22 C	75 % RH	CY	female	25	9	0.4858	0.0314446	Left	Forewing	ups	wet	142.798	0.53065	1.72995	0.0278342	NA	NA	NA	NA	108	0.167889
1188	moore	22-44-06	Ghana	2	moore_44.1	Temp_1	22 C	75 % RH	CY	female	25	9	0.4858	0.0314446	Right	Hindwing	uns	wet	138.87	3.6839	12.404	0.0683667	NA	NA	NA	NA	108	0.262347
349	moore	22-44-07	Ghana	2	moore_44.1	Temp_1	22 C	75 % RH	CY	male	25	10	0.4994	0.0317353	Left	Forewing	ups	wet	117.454	0.4291	1.1611	0.033915	NA	NA	NA	NA	108	0.189121
1315	moore	22-44-07	Ghana	2	moore_44.1	Temp_1	22 C	75 % RH	CY	male	25	10	0.4994	0.0317353	Right	Hindwing	uns	wet	122.827	2.9456	9.9105	0.0643011	NA	NA	NA	NA	108	0.257051
136	moore	22-44-09	Ghana	2	moore_44.1	Temp_1	22 C	75 % RH	CY	male	25	10	0.4564	0.030797	Left	Forewing	ups	wet	106.087	0.17835	0.153755	0.0608725	NA	NA	NA	NA	108	0.257189
1130	moore	22-44-09	Ghana	2	moore_44.1	Temp_1	22 C	75 % RH	CY	male	25	10	0.4564	0.030797	Left	Hindwing	ups	wet	108.94	2.507	8.75175	0.099405	NA	NA	NA	NA	108	0.323029
162	moore	22-44-10	Ghana	2	moore_44.1	Temp_1	22 C	75 % RH	CY	female	25	10	0.4749	0.0312076	Left	Forewing	ups	wet	132.922	0.6291	2.2836	0.0429093	NA	NA	NA	NA	108	0.212219
1260	moore	22-44-10	Ghana	2	moore_44.1	Temp_1	22 C	75 % RH	CY	female	25	10	0.4749	0.0312076	Right	Hindwing	uns	wet	147.952	3.60995	11.9343	0.063474	NA	NA	NA	NA	108	0.253115
353	moore	22-44-11	Ghana	2	moore_44.1	Temp_1	22 C	75 % RH	CY	male	25	10	0.4553	0.0307722	Right	Forewing	uns	wet	110.506	0.2904	0.90805	0.0360388	NA	NA	NA	NA	108	0.193087
1297	moore	22-44-11	Ghana	2	moore_44.1	Temp_1	22 C	75 % RH	CY	male	25	10	0.4553	0.0307722	Right	Hindwing	uns	wet	113.058	2.2	8.05715	0.0698721	NA	NA	NA	NA	108	0.262196
275	moore	22-44-13	Ghana	2	moore_44.1	Temp_1	22 C	75 % RH	CY	female	27	9	0.4429	0.0282318	Right	Forewing	uns	wet	119.636	0.47245	1.58445	0.0326915	NA	NA	NA	NA	108	0.187346
1561	moore	22-44-13	Ghana	2	moore_44.1	Temp_1	22 C	75 % RH	CY	female	27	9	0.4429	0.0282318	Right	Hindwing	uns	wet	123.208	2.6911	9.08535	0.0529397	NA	NA	NA	NA	108	0.232329
235	moore	22-44-14	Ghana	2	moore_44.1	Temp_1	22 C	75 % RH	CY	female	27	10	0.3766	0.0267463	Right	Forewing	uns	wet	117.342	0.5621	2.025	0.0410688	NA	NA	NA	NA	108	0.20857
1199	moore	22-44-14	Ghana	2	moore_44.1	Temp_1	22 C	75 % RH	CY	female	27	10	0.3766	0.0267463	Right	Hindwing	uns	wet	127.912	3.46305	11.6944	0.0779308	NA	NA	NA	NA	108	0.283012
564	moore	22-44-15	Ghana	2	moore_44.1	Temp_1	22 C	75 % RH	CY	female	27	10	0.4809	0.0290171	Left	Forewing	ups	wet	142.195	0.68855	2.7434	0.0150986	NA	NA	NA	NA	108	0.126013
1490	moore	22-44-15	Ghana	2	moore_44.1	Temp_1	22 C	75 % RH	CY	female	27	10	0.4809	0.0290171	Left	Hindwing	ups	wet	150.374	3.84275	14.2823	0.0504551	NA	NA	NA	NA	108	0.23111
655	moore	22-44-16	Ghana	2	moore_44.1	Temp_1	22 C	75 % RH	CY	male	27	10	0.4012	0.0273164	Right	Forewing	uns	wet	106.172	0.29015	0.81005	0.00962071	NA	NA	NA	NA	108	0.1026
1608	moore	22-44-16	Ghana	2	moore_44.1	Temp_1	22 C	75 % RH	CY	male	27	10	0.4012	0.0273164	Left	Hindwing	ups	wet	117.184	2.7631	9.21985	0.0419923	NA	NA	NA	NA	108	0.212688
496	moore	22-44-17	Ghana	2	moore_44.1	Temp_1	22 C	75 % RH	CY	female	28	10	0.3459	0.0250703	Right	Forewing	uns	wet	115.281	0.57565	2.07585	0.0271875	NA	NA	NA	NA	108	0.161019
1470	moore	22-44-17	Ghana	2	moore_44.1	Temp_1	22 C	75 % RH	CY	female	28	10	0.3459	0.0250703	Right	Hindwing	uns	wet	114.406	2.74615	8.9168	0.047994	NA	NA	NA	NA	108	0.222259
333	moore	22-44-18	Ghana	2	moore_44.1	Temp_1	22 C	75 % RH	CY	female	27	10	0.3391	0.0258273	Left	Forewing	ups	wet	95.7464	0.55315	1.89355	0.0428062	NA	NA	NA	NA	108	0.216664
1195	moore	22-44-18	Ghana	2	moore_44.1	Temp_1	22 C	75 % RH	CY	female	27	10	0.3391	0.0258273	Right	Hindwing	uns	wet	109.398	2.53505	8.35895	0.0904964	NA	NA	NA	NA	108	0.297199
282	moore	22-44-19	Ghana	2	moore_44.1	Temp_1	22 C	75 % RH	CY	female	33	9	0.3985	0.0222995	Left	Forewing	ups	wet	117.649	0.6682	2.43485	0.0361354	NA	NA	NA	NA	108	0.194319
1334	moore	22-44-19	Ghana	2	moore_44.1	Temp_1	22 C	75 % RH	CY	female	33	9	0.3985	0.0222995	Left	Hindwing	ups	wet	124.494	3.481	12.0541	0.0619681	NA	NA	NA	NA	108	0.248648
2089	moll	1	India	2	moll_3	Plant_2	24 C	69 % RH	BG	male	29	12	0.5419	0.0281131	Left	Forewing	uns	dry	NA	NA	NA	NA	1	0.02026	d	1	2016-09-19	NA
2090	moll	1	India	2	moll_3	Plant_2	24 C	69 % RH	BG	male	29	12	0.5419	0.0281131	Left	Hindwing	uns	dry	NA	NA	NA	NA	1	0.02026	d	1	2016-09-19	NA
2117	moll	2	India	2	moll_3	Plant_2	24 C	69 % RH	BG	female	29	10	0.4608	0.0266342	Left	Forewing	uns	dry	NA	NA	NA	NA	1	0.02026	d	1	2016-09-19	NA
2118	moll	2	India	2	moll_3	Plant_2	24 C	69 % RH	BG	female	29	10	0.4608	0.0266342	Left	Hindwing	uns	dry	NA	NA	NA	NA	1	0.02026	d	1	2016-09-19	NA
2159	moll	4	India	2	moll_4	Plant_2	24 C	69 % RH	CY	female	28	9	0.3659	0.0255444	Left	Forewing	uns	dry	NA	NA	NA	NA	2	0.04792	i	1	2016-09-20	NA
2160	moll	4	India	2	moll_4	Plant_2	24 C	69 % RH	CY	female	28	9	0.3659	0.0255444	Left	Hindwing	uns	dry	NA	NA	NA	NA	2	0.04792	i	1	2016-09-20	NA
2301	moll	6	India	2	moll_4	Plant_2	24 C	69 % RH	CY	female	28	8	0.3883	0.0260554	Left	Forewing	uns	int	NA	NA	NA	NA	2	0.04792	d	2	2016-09-20	NA
2302	moll	6	India	2	moll_4	Plant_2	24 C	69 % RH	CY	female	28	8	0.3883	0.0260554	Left	Hindwing	uns	int	NA	NA	NA	NA	2	0.04792	d	2	2016-09-20	NA
2503	moll	7	India	2	moll_4	Plant_2	24 C	69 % RH	CY	female	28	8	0.3977	0.026264	Left	Forewing	uns	dry	NA	NA	NA	NA	1	0.02026	d	1	2016-09-20	NA
2504	moll	7	India	2	moll_4	Plant_2	24 C	69 % RH	CY	female	28	8	0.3977	0.026264	Left	Hindwing	uns	dry	NA	NA	NA	NA	1	0.02026	d	1	2016-09-20	NA
2681	moll	8	India	2	moll_4	Plant_2	24 C	69 % RH	CY	male	28	9	0.4357	0.0270752	Left	Forewing	uns	dry	NA	NA	NA	NA	1	0.02026	d	0	2016-09-20	NA
2682	moll	8	India	2	moll_4	Plant_2	24 C	69 % RH	CY	male	28	9	0.4357	0.0270752	Left	Hindwing	uns	dry	NA	NA	NA	NA	1	0.02026	d	0	2016-09-20	NA
2883	moll	9	India	2	moll_4	Plant_2	24 C	69 % RH	CY	male	28	8	0.3999	0.0263123	Left	Forewing	uns	dry	NA	NA	NA	NA	1	0.02026	d	1	2016-09-20	NA
2884	moll	9	India	2	moll_4	Plant_2	24 C	69 % RH	CY	male	28	8	0.3999	0.0263123	Left	Hindwing	uns	dry	NA	NA	NA	NA	1	0.02026	d	1	2016-09-20	NA
2091	moll	10	India	2	moll_1	Plant_2	24 C	69 % RH	HG	male	36	13	0.38604	0.0202259	Left	Forewing	uns	dry	NA	NA	NA	NA	1	0.02026	d	0	2016-09-19	NA
2092	moll	10	India	2	moll_1	Plant_2	24 C	69 % RH	HG	male	36	13	0.38604	0.0202259	Left	Hindwing	uns	dry	NA	NA	NA	NA	1	0.02026	d	0	2016-09-19	NA
2095	moll	11.1	India	2	moll_9	Plant_2	24 C	69 % RH	SwOp	male	26	9	0.3881	0.0280548	Left	Forewing	uns	int	NA	NA	NA	NA	3	0.07433	w	2	2016-10-09	NA
2096	moll	11.1	India	2	moll_9	Plant_2	24 C	69 % RH	SwOp	male	26	9	0.3881	0.0280548	Left	Hindwing	uns	int	NA	NA	NA	NA	3	0.07433	w	2	2016-10-09	NA
2115	moll	19	India	2	moll_1	Plant_2	24 C	69 % RH	HG	female	39	10	NA	NA	Left	Forewing	uns	dry	NA	NA	NA	NA	1	0.02026	d	1	2016-09-19	NA
2116	moll	19	India	2	moll_1	Plant_2	24 C	69 % RH	HG	female	39	10	NA	NA	Left	Hindwing	uns	dry	NA	NA	NA	NA	1	0.02026	d	1	2016-09-19	NA
2119	moll	20	India	2	moll_13	Plant_2	24 C	69 % RH	BG	female	27	10	0.4601	0.0285926	Left	Forewing	uns	wet	NA	NA	NA	NA	4	0.09885	w	4	2016-10-10	NA
2120	moll	20	India	2	moll_13	Plant_2	24 C	69 % RH	BG	female	27	10	0.4601	0.0285926	Left	Hindwing	uns	wet	NA	NA	NA	NA	4	0.09885	w	4	2016-10-10	NA
2121	moll	21	India	2	moll_13	Plant_2	24 C	69 % RH	BG	female	27	9	0.4362	0.0280887	Left	Forewing	uns	dry	NA	NA	NA	NA	1	0.02026	d	2	2016-10-10	NA
2122	moll	21	India	2	moll_13	Plant_2	24 C	69 % RH	BG	female	27	9	0.4362	0.0280887	Left	Hindwing	uns	dry	NA	NA	NA	NA	1	0.02026	d	2	2016-10-10	NA
2123	moll	22	India	2	moll_14	Plant_2	24 C	69 % RH	SwOp	male	26	10	0.3729	0.0276837	Left	Forewing	uns	int	NA	NA	NA	NA	3	0.07433	w	2	2016-10-11	NA
2124	moll	22	India	2	moll_14	Plant_2	24 C	69 % RH	SwOp	male	26	10	0.3729	0.0276837	Left	Hindwing	uns	int	NA	NA	NA	NA	3	0.07433	w	2	2016-10-11	NA
2125	moll	23	India	2	moll_14	Plant_2	24 C	69 % RH	SwOp	male	26	9	0.3907	0.0281174	Left	Forewing	uns	int	NA	NA	NA	NA	2	0.04792	w	2	2016-10-11	NA
2126	moll	23	India	2	moll_14	Plant_2	24 C	69 % RH	SwOp	male	26	9	0.3907	0.0281174	Left	Hindwing	uns	int	NA	NA	NA	NA	2	0.04792	w	2	2016-10-11	NA
2127	moll	24	India	2	moll_14	Plant_2	24 C	69 % RH	SwOp	male	26	8	0.3375	0.0267784	Left	Forewing	uns	dry	NA	NA	NA	NA	1	0.02026	d	2	2016-10-11	NA
2128	moll	24	India	2	moll_14	Plant_2	24 C	69 % RH	SwOp	male	26	8	0.3375	0.0267784	Left	Hindwing	uns	dry	NA	NA	NA	NA	1	0.02026	d	2	2016-10-11	NA
2129	moll	25	India	2	moll_28	Plant_2	24 C	69 % RH	CY	female	24	8	0.3987	0.030667	Left	Forewing	uns	wet	NA	NA	NA	NA	4	0.09885	w	4	2016-10-13	NA
2130	moll	25	India	2	moll_28	Plant_2	24 C	69 % RH	CY	female	24	8	0.3987	0.030667	Left	Hindwing	uns	wet	NA	NA	NA	NA	4	0.09885	w	4	2016-10-13	NA
2131	moll	26.1	India	2	moll_19	Plant_2	24 C	69 % RH	HG	male	26	9	0.4427	0.0293132	Left	Forewing	uns	int	NA	NA	NA	NA	3	0.07433	w	3	2016-10-11	NA
2132	moll	26.1	India	2	moll_19	Plant_2	24 C	69 % RH	HG	male	26	9	0.4427	0.0293132	Left	Hindwing	uns	int	NA	NA	NA	NA	3	0.07433	w	3	2016-10-11	NA
2133	moll	26.2	India	2	moll_39.5	Plant_2	24 C	69 % RH	HG	female	21	9	NA	NA	Left	Forewing	uns	wet	NA	NA	NA	NA	3	0.07433	w	3	2016-10-16	NA
2134	moll	26.2	India	2	moll_39.5	Plant_2	24 C	69 % RH	HG	female	21	9	NA	NA	Left	Hindwing	uns	wet	NA	NA	NA	NA	3	0.07433	w	3	2016-10-16	NA
2135	moll	27	India	2	moll_39	Plant_2	24 C	69 % RH	TG	male	22	8	0.4872	0.0357668	Left	Forewing	uns	wet	NA	NA	NA	NA	3	0.07433	w	4	2016-10-15	NA
2136	moll	27	India	2	moll_39	Plant_2	24 C	69 % RH	TG	male	22	8	0.4872	0.0357668	Left	Hindwing	uns	wet	NA	NA	NA	NA	3	0.07433	w	4	2016-10-15	NA
2137	moll	28	India	2	moll_9	Plant_2	24 C	69 % RH	SwOp	male	28	8	0.3889	0.0260688	Left	Forewing	uns	int	NA	NA	NA	NA	2	0.04792	i	2	2016-10-09	NA
2138	moll	28	India	2	moll_9	Plant_2	24 C	69 % RH	SwOp	male	28	8	0.3889	0.0260688	Left	Hindwing	uns	int	NA	NA	NA	NA	2	0.04792	i	2	2016-10-09	NA
2139	moll	29	India	2	moll_9	Plant_2	24 C	69 % RH	SwOp	female	29	8	0.3802	0.0249808	Left	Forewing	uns	wet	NA	NA	NA	NA	3	0.07433	w	4	2016-10-09	NA
2140	moll	29	India	2	moll_9	Plant_2	24 C	69 % RH	SwOp	female	29	8	0.3802	0.0249808	Left	Hindwing	uns	wet	NA	NA	NA	NA	3	0.07433	w	4	2016-10-09	NA
2141	moll	30	India	2	moll_9	Plant_2	24 C	69 % RH	SwOp	female	29	8	0.3763	0.0248951	Left	Forewing	uns	wet	NA	NA	NA	NA	3	0.07433	w	3	2016-10-09	NA
2142	moll	30	India	2	moll_9	Plant_2	24 C	69 % RH	SwOp	female	29	8	0.3763	0.0248951	Left	Hindwing	uns	wet	NA	NA	NA	NA	3	0.07433	w	3	2016-10-09	NA
2143	moll	31	India	2	moll_9	Plant_2	24 C	69 % RH	SwOp	female	29	8	0.3824	0.0250289	Left	Forewing	uns	wet	NA	NA	NA	NA	4	0.09885	w	4	2016-10-09	NA
2144	moll	31	India	2	moll_9	Plant_2	24 C	69 % RH	SwOp	female	29	8	0.3824	0.0250289	Left	Hindwing	uns	wet	NA	NA	NA	NA	4	0.09885	w	4	2016-10-09	NA
2145	moll	32	India	2	moll_9	Plant_2	24 C	69 % RH	SwOp	female	29	9	0.4596	0.0266111	Left	Forewing	uns	int	NA	NA	NA	NA	2	0.04792	i	2	2016-10-09	NA
2146	moll	32	India	2	moll_9	Plant_2	24 C	69 % RH	SwOp	female	29	9	0.4596	0.0266111	Left	Hindwing	uns	int	NA	NA	NA	NA	2	0.04792	i	2	2016-10-09	NA
2147	moll	33	India	2	moll_22	Plant_2	24 C	69 % RH	BG	female	26	8	0.3757	0.0277528	Left	Forewing	uns	wet	NA	NA	NA	NA	3	0.07433	w	3	2016-10-12	NA
2148	moll	33	India	2	moll_22	Plant_2	24 C	69 % RH	BG	female	26	8	0.3757	0.0277528	Left	Hindwing	uns	wet	NA	NA	NA	NA	3	0.07433	w	3	2016-10-12	NA
2149	moll	34	India	2	moll_22	Plant_2	24 C	69 % RH	BG	female	26	8	0.4109	0.0285938	Left	Forewing	uns	wet	NA	NA	NA	NA	3	0.07433	w	3	2016-10-12	NA
2150	moll	34	India	2	moll_22	Plant_2	24 C	69 % RH	BG	female	26	8	0.4109	0.0285938	Left	Hindwing	uns	wet	NA	NA	NA	NA	3	0.07433	w	3	2016-10-12	NA
2151	moll	36	India	2	moll_22	Plant_2	24 C	69 % RH	BG	female	26	9	0.4354	0.0291512	Left	Forewing	uns	int	NA	NA	NA	NA	2	0.04792	d	2	2016-10-12	NA
2152	moll	36	India	2	moll_22	Plant_2	24 C	69 % RH	BG	female	26	9	0.4354	0.0291512	Left	Hindwing	uns	int	NA	NA	NA	NA	2	0.04792	d	2	2016-10-12	NA
2153	moll	37	India	2	moll_19	Plant_2	24 C	69 % RH	HG	male	27	8	0.36	0.0263474	Left	Forewing	uns	wet	NA	NA	NA	NA	3	0.07433	w	3	2016-10-11	NA
2154	moll	37	India	2	moll_19	Plant_2	24 C	69 % RH	HG	male	27	8	0.36	0.0263474	Left	Hindwing	uns	wet	NA	NA	NA	NA	3	0.07433	w	3	2016-10-11	NA
2155	moll	38	India	2	moll_16	Plant_2	24 C	69 % RH	CO	male	27	NA	0.325	0.0254642	Left	Forewing	uns	wet	NA	NA	NA	NA	NA	NA	NA	NA	2016-10-11	NA
2156	moll	38	India	2	moll_16	Plant_2	24 C	69 % RH	CO	male	27	NA	0.325	0.0254642	Left	Hindwing	uns	wet	NA	NA	NA	NA	NA	NA	NA	NA	2016-10-11	NA
2157	moll	39	India	2	moll_18	Plant_2	24 C	69 % RH	Setaria	female	27	8	0.4816	0.0290312	Left	Forewing	uns	int	NA	NA	NA	NA	2	0.04792	w	3	2016-10-11	NA
2158	moll	39	India	2	moll_18	Plant_2	24 C	69 % RH	Setaria	female	27	8	0.4816	0.0290312	Left	Hindwing	uns	int	NA	NA	NA	NA	2	0.04792	w	3	2016-10-11	NA
2299	moll	59	India	2	moll_15	Plant_2	24 C	69 % RH	Setaria	female	29	9	0.3014	0.0231197	Left	Forewing	uns	int	NA	NA	NA	NA	2	0.04792	i	2	2016-10-11	NA
2300	moll	59	India	2	moll_15	Plant_2	24 C	69 % RH	Setaria	female	29	9	0.3014	0.0231197	Left	Hindwing	uns	int	NA	NA	NA	NA	2	0.04792	i	2	2016-10-11	NA
2303	moll	60	India	2	moll_15	Plant_2	24 C	69 % RH	Setaria	male	29	9	0.4075	0.0255649	Left	Forewing	uns	int	NA	NA	NA	NA	3	0.07433	d	3	2016-10-11	NA
2304	moll	60	India	2	moll_15	Plant_2	24 C	69 % RH	Setaria	male	29	9	0.4075	0.0255649	Left	Hindwing	uns	int	NA	NA	NA	NA	3	0.07433	d	3	2016-10-11	NA
2323	moll	61	India	2	moll_13	Plant_2	24 C	69 % RH	BG	female	29	9	0.4567	0.026555	Left	Forewing	uns	wet	NA	NA	NA	NA	4	0.09885	w	4	2016-10-10	NA
2324	moll	61	India	2	moll_13	Plant_2	24 C	69 % RH	BG	female	29	9	0.4567	0.026555	Left	Hindwing	uns	wet	NA	NA	NA	NA	4	0.09885	w	4	2016-10-10	NA
2341	moll	62	India	2	moll_11	Plant_2	24 C	69 % RH	LightOpl	male	30	9	0.2701	0.021547	Left	Forewing	uns	int	NA	NA	NA	NA	3	0.07433	w	2	2016-10-10	NA
2342	moll	62	India	2	moll_11	Plant_2	24 C	69 % RH	LightOpl	male	30	9	0.2701	0.021547	Left	Hindwing	uns	int	NA	NA	NA	NA	3	0.07433	w	2	2016-10-10	NA
2357	moll	63	India	2	moll_16	Plant_2	24 C	69 % RH	CO	female	28	9	0.4561	0.0274913	Left	Forewing	uns	wet	NA	NA	NA	NA	4	0.09885	w	4	2016-10-11	NA
2358	moll	63	India	2	moll_16	Plant_2	24 C	69 % RH	CO	female	28	9	0.4561	0.0274913	Left	Hindwing	uns	wet	NA	NA	NA	NA	4	0.09885	w	4	2016-10-11	NA
2379	moll	64	India	2	moll_30	Plant_2	24 C	69 % RH	BG	female	27	9	0.4374	0.0281144	Left	Forewing	uns	wet	NA	NA	NA	NA	3	0.07433	w	4	2016-10-13	NA
2380	moll	64	India	2	moll_30	Plant_2	24 C	69 % RH	BG	female	27	9	0.4374	0.0281144	Left	Hindwing	uns	wet	NA	NA	NA	NA	3	0.07433	w	4	2016-10-13	NA
2401	moll	65	India	2	moll_13	Plant_2	24 C	69 % RH	BG	male	30	9	0.4508	0.0255588	Left	Forewing	uns	wet	NA	NA	NA	NA	4	0.09885	w	3	2016-10-10	NA
2402	moll	65	India	2	moll_13	Plant_2	24 C	69 % RH	BG	male	30	9	0.4508	0.0255588	Left	Hindwing	uns	wet	NA	NA	NA	NA	4	0.09885	w	3	2016-10-10	NA
2659	moll	79	India	2	moll_16	Plant_2	24 C	69 % RH	CO	female	30	8	0.3669	0.0238632	Left	Forewing	uns	wet	NA	NA	NA	NA	NA	NA	NA	NA	2016-10-11	NA
2660	moll	79	India	2	moll_16	Plant_2	24 C	69 % RH	CO	female	30	8	0.3669	0.0238632	Left	Hindwing	uns	wet	NA	NA	NA	NA	NA	NA	NA	NA	2016-10-11	NA
2683	moll	80	India	2	moll_40	Plant_2	24 C	69 % RH	CY	female	25	6	0.3918	0.0292695	Left	Forewing	uns	wet	NA	NA	NA	NA	4	0.09885	w	4	2016-10-16	NA
2684	moll	80	India	2	moll_40	Plant_2	24 C	69 % RH	CY	female	25	6	0.3918	0.0292695	Left	Hindwing	uns	wet	NA	NA	NA	NA	4	0.09885	w	4	2016-10-16	NA
2703	moll	81	India	2	moll_16	Plant_2	24 C	69 % RH	CO	female	30	9	0.4392	0.0253376	Left	Forewing	uns	int	NA	NA	NA	NA	3	0.07433	i	2	2016-10-11	NA
2704	moll	81	India	2	moll_16	Plant_2	24 C	69 % RH	CO	female	30	9	0.4392	0.0253376	Left	Hindwing	uns	int	NA	NA	NA	NA	3	0.07433	i	2	2016-10-11	NA
2725	moll	82	India	2	moll_19	Plant_2	24 C	69 % RH	HG	female	30	7	0.4267	0.0250949	Left	Forewing	uns	wet	NA	NA	NA	NA	4	0.09885	d	4	2016-10-11	NA
2726	moll	82	India	2	moll_19	Plant_2	24 C	69 % RH	HG	female	30	7	0.4267	0.0250949	Left	Hindwing	uns	wet	NA	NA	NA	NA	4	0.09885	d	4	2016-10-11	NA
2747	moll	83	India	2	moll_9	Plant_2	24 C	69 % RH	SwOp	female	32	8	0.3782	0.0225991	Left	Forewing	uns	wet	NA	NA	NA	NA	3	0.07433	d	4	2016-10-09	NA
2748	moll	83	India	2	moll_9	Plant_2	24 C	69 % RH	SwOp	female	32	8	0.3782	0.0225991	Left	Hindwing	uns	wet	NA	NA	NA	NA	3	0.07433	d	4	2016-10-09	NA
2779	moll	85	India	2	moll_39.5	Plant_2	24 C	69 % RH	HG	female	26	8	0.5151	0.0308312	Left	Forewing	uns	wet	NA	NA	NA	NA	3	0.07433	w	4	2016-10-16	NA
2780	moll	85	India	2	moll_39.5	Plant_2	24 C	69 % RH	HG	female	26	8	0.5151	0.0308312	Left	Hindwing	uns	wet	NA	NA	NA	NA	3	0.07433	w	4	2016-10-16	NA
2797	moll	86	India	2	moll_31	Plant_2	24 C	69 % RH	Setaria	male	29	8	0.3704	0.0247643	Left	Forewing	uns	dry	NA	NA	NA	NA	1	0.02026	d	2	2016-10-13	NA
2798	moll	86	India	2	moll_31	Plant_2	24 C	69 % RH	Setaria	male	29	8	0.3704	0.0247643	Left	Hindwing	uns	dry	NA	NA	NA	NA	1	0.02026	d	2	2016-10-13	NA
2817	moll	87	India	2	moll_11	Plant_2	24 C	69 % RH	LightOpl	male	32	8	0.3571	0.0221707	Left	Forewing	uns	int	NA	NA	NA	NA	2	0.04792	d	2	2016-10-10	NA
2818	moll	87	India	2	moll_11	Plant_2	24 C	69 % RH	LightOpl	male	32	8	0.3571	0.0221707	Left	Hindwing	uns	int	NA	NA	NA	NA	2	0.04792	d	2	2016-10-10	NA
2839	moll	88	India	2	moll_27	Plant_2	24 C	69 % RH	LightOpl	male	30	8	0.3022	0.0223688	Left	Forewing	uns	int	NA	NA	NA	NA	3	0.07433	d	2	2016-10-12	NA
2840	moll	88	India	2	moll_27	Plant_2	24 C	69 % RH	LightOpl	male	30	8	0.3022	0.0223688	Left	Hindwing	uns	int	NA	NA	NA	NA	3	0.07433	d	2	2016-10-12	NA
2861	moll	89	India	2	moll_30	Plant_2	24 C	69 % RH	BG	female	29	8	0.49	0.0271853	Left	Forewing	uns	wet	NA	NA	NA	NA	4	0.09885	w	4	2016-10-13	NA
2862	moll	89	India	2	moll_30	Plant_2	24 C	69 % RH	BG	female	29	8	0.49	0.0271853	Left	Hindwing	uns	wet	NA	NA	NA	NA	4	0.09885	w	4	2016-10-13	NA
2887	moll	91	India	2	moll_11	Plant_2	24 C	69 % RH	LightOpl	male	31	NA	0.3284	0.0222556	Left	Forewing	uns	int	NA	NA	NA	NA	2	0.04792	d	2	2016-10-12	NA
2888	moll	91	India	2	moll_11	Plant_2	24 C	69 % RH	LightOpl	male	31	NA	0.3284	0.0222556	Left	Hindwing	uns	int	NA	NA	NA	NA	2	0.04792	d	2	2016-10-12	NA
2889	moll	92	India	2	moll_40	Plant_2	24 C	69 % RH	CY	male	27	9	0.2957	0.0246748	Left	Forewing	uns	int	NA	NA	NA	NA	2	0.04792	w	2	2016-10-16	NA
2890	moll	92	India	2	moll_40	Plant_2	24 C	69 % RH	CY	male	27	9	0.2957	0.0246748	Left	Hindwing	uns	int	NA	NA	NA	NA	2	0.04792	w	2	2016-10-16	NA
2891	moll	93	India	2	moll_37	Plant_2	24 C	69 % RH	CO	female	29	NA	0.338	0.0240201	Left	Forewing	uns	dry	NA	NA	NA	NA	NA	NA	NA	NA	2016-10-14	NA
2892	moll	93	India	2	moll_37	Plant_2	24 C	69 % RH	CO	female	29	NA	0.338	0.0240201	Left	Hindwing	uns	dry	NA	NA	NA	NA	NA	NA	NA	NA	2016-10-14	NA
2893	moll	94	India	2	moll_35	Plant_2	24 C	69 % RH	CY	female	29	9	0.3876	0.0251418	Left	Forewing	uns	wet	NA	NA	NA	NA	4	0.09885	w	4	2016-10-14	NA
2894	moll	94	India	2	moll_35	Plant_2	24 C	69 % RH	CY	female	29	9	0.3876	0.0251418	Left	Hindwing	uns	wet	NA	NA	NA	NA	4	0.09885	w	4	2016-10-14	NA
2895	moll	95	India	2	moll_31	Plant_2	24 C	69 % RH	Setaria	male	29	8	0.236	0.0213095	Left	Forewing	uns	int	NA	NA	NA	NA	2	0.04792	w	3	2016-10-13	NA
2896	moll	95	India	2	moll_31	Plant_2	24 C	69 % RH	Setaria	male	29	8	0.236	0.0213095	Left	Hindwing	uns	int	NA	NA	NA	NA	2	0.04792	w	3	2016-10-13	NA
2897	moll	96	India	2	moll_16	Plant_2	24 C	69 % RH	CO	female	32	NA	0.2888	0.0206561	Left	Forewing	uns	int	NA	NA	NA	NA	2	0.04792	d	2	2016-10-11	NA
2898	moll	96	India	2	moll_16	Plant_2	24 C	69 % RH	CO	female	32	NA	0.2888	0.0206561	Left	Hindwing	uns	int	NA	NA	NA	NA	2	0.04792	d	2	2016-10-11	NA
2899	moll	97	India	2	moll_14	Plant_2	24 C	69 % RH	SwOp	female	32	7	0.4289	0.0235669	Left	Forewing	uns	wet	NA	NA	NA	NA	3	0.07433	w	3	2016-10-11	NA
2900	moll	97	India	2	moll_14	Plant_2	24 C	69 % RH	SwOp	female	32	7	0.4289	0.0235669	Left	Hindwing	uns	wet	NA	NA	NA	NA	3	0.07433	w	3	2016-10-11	NA
2901	moll	98	India	2	moll_18	Plant_2	24 C	69 % RH	Setaria	female	32	7	0.4216	0.0234324	Left	Forewing	uns	wet	NA	NA	NA	NA	4	0.09885	w	4	2016-10-11	NA
2902	moll	98	India	2	moll_18	Plant_2	24 C	69 % RH	Setaria	female	32	7	0.4216	0.0234324	Left	Hindwing	uns	wet	NA	NA	NA	NA	4	0.09885	w	4	2016-10-11	NA
2093	moll	109	India	2	moll_39	Plant_2	24 C	69 % RH	TG	female	31	10	0.4656	0.0250021	Left	Forewing	uns	dry	NA	NA	NA	NA	1	0.02026	d	2	2016-10-15	NA
2094	moll	109	India	2	moll_39	Plant_2	24 C	69 % RH	TG	female	31	10	0.4656	0.0250021	Left	Hindwing	uns	dry	NA	NA	NA	NA	1	0.02026	d	2	2016-10-15	NA
2097	moll	110	India	2	moll_27	Plant_2	24 C	69 % RH	LightOpl	female	35	8	0.291	0.0189334	Left	Forewing	uns	int	NA	NA	NA	NA	2	0.04792	d	3	2016-10-12	NA
2098	moll	110	India	2	moll_27	Plant_2	24 C	69 % RH	LightOpl	female	35	8	0.291	0.0189334	Left	Hindwing	uns	int	NA	NA	NA	NA	2	0.04792	d	3	2016-10-12	NA
2099	moll	111	India	2	moll_11	Plant_2	24 C	69 % RH	LightOpl	male	37	7	0.3288	0.0186542	Left	Forewing	uns	int	NA	NA	NA	NA	3	0.07433	d	2	2016-10-10	NA
2100	moll	111	India	2	moll_11	Plant_2	24 C	69 % RH	LightOpl	male	37	7	0.3288	0.0186542	Left	Hindwing	uns	int	NA	NA	NA	NA	3	0.07433	d	2	2016-10-10	NA
2101	moll	112	India	2	moll_20	Plant_2	24 C	69 % RH	SwOp	female	35	9	0.3761	0.0206237	Left	Forewing	uns	int	NA	NA	NA	NA	3	0.07433	d	2	2016-10-12	NA
2102	moll	112	India	2	moll_20	Plant_2	24 C	69 % RH	SwOp	female	35	9	0.3761	0.0206237	Left	Hindwing	uns	int	NA	NA	NA	NA	3	0.07433	d	2	2016-10-12	NA
2103	moll	113	India	2	moll_31	Plant_2	24 C	69 % RH	Setaria	male	34	8	0.2649	0.0188893	Left	Forewing	uns	int	NA	NA	NA	NA	NA	NA	NA	NA	2016-10-13	NA
2104	moll	113	India	2	moll_31	Plant_2	24 C	69 % RH	Setaria	male	34	8	0.2649	0.0188893	Left	Hindwing	uns	int	NA	NA	NA	NA	NA	NA	NA	NA	2016-10-13	NA
2105	moll	114	India	2	moll_17	Plant_2	24 C	69 % RH	Opl	male	35	8	0.3161	0.0194629	Left	Forewing	uns	int	NA	NA	NA	NA	3	0.07433	d	3	2016-10-11	NA
2106	moll	114	India	2	moll_17	Plant_2	24 C	69 % RH	Opl	male	35	8	0.3161	0.0194629	Left	Hindwing	uns	int	NA	NA	NA	NA	3	0.07433	d	3	2016-10-11	NA
2107	moll	121	India	2	moll_15	Plant_2	24 C	69 % RH	Setaria	male	37	8	0.2232	0.0163944	Left	Forewing	uns	dry	NA	NA	NA	NA	1	0.02026	w	1	2016-10-11	NA
2108	moll	121	India	2	moll_15	Plant_2	24 C	69 % RH	Setaria	male	37	8	0.2232	0.0163944	Left	Hindwing	uns	dry	NA	NA	NA	NA	1	0.02026	w	1	2016-10-11	NA
2109	moll	122	India	2	moll_20	Plant_2	24 C	69 % RH	SwOp	male	36	8	0.4236	0.0208617	Left	Forewing	uns	dry	NA	NA	NA	NA	1	0.02026	d	1	2016-10-12	NA
2110	moll	122	India	2	moll_20	Plant_2	24 C	69 % RH	SwOp	male	36	8	0.4236	0.0208617	Left	Hindwing	uns	dry	NA	NA	NA	NA	1	0.02026	d	1	2016-10-12	NA
2111	moll	162	India	2	moll_20	Plant_2	24 C	69 % RH	SwOp	male	39	10	0.4132	0.019098	Left	Forewing	uns	dry	NA	NA	NA	NA	1	0.02026	d	1	2016-10-12	NA
2112	moll	162	India	2	moll_20	Plant_2	24 C	69 % RH	SwOp	male	39	10	0.4132	0.019098	Left	Hindwing	uns	dry	NA	NA	NA	NA	1	0.02026	d	1	2016-10-12	NA
2113	moll	163	India	2	moll_17	Plant_2	24 C	69 % RH	Opl	female	38	7	0.3156	0.0179169	Left	Forewing	uns	int	NA	NA	NA	NA	3	0.07433	d	2	2016-10-11	NA
2114	moll	163	India	2	moll_17	Plant_2	24 C	69 % RH	Opl	female	38	7	0.3156	0.0179169	Left	Hindwing	uns	int	NA	NA	NA	NA	3	0.07433	d	2	2016-10-11	NA
2161	moll	441	India	2	moll_55	Plant_3	24 C	69 % RH	Setaria	male	22	8	0.3628	0.032419	Left	Forewing	uns	dry	NA	NA	NA	0.0126006	1	0.02026	d	0	2016-12-14	0.112252
2162	moll	441	India	2	moll_55	Plant_3	24 C	69 % RH	Setaria	male	22	8	0.3628	0.032419	Left	Hindwing	uns	dry	133.097	NA	NA	0.0126006	1	0.02026	d	0	2016-12-14	0.112252
2163	moll	442	India	2	moll_55	Plant_3	24 C	69 % RH	Setaria	male	22	8	0.3776	0.032854	Left	Forewing	uns	dry	NA	NA	NA	NA	1	0.02026	d	2	2016-12-14	NA
2164	moll	442	India	2	moll_55	Plant_3	24 C	69 % RH	Setaria	male	22	8	0.3776	0.032854	Left	Hindwing	uns	dry	NA	NA	NA	NA	1	0.02026	d	2	2016-12-14	NA
2165	moll	443	India	2	moll_55	Plant_3	24 C	69 % RH	Setaria	male	22	7	0.3767	0.0328279	Left	Forewing	uns	wet	NA	NA	NA	NA	3	0.07433	w	3	2016-12-14	NA
2166	moll	443	India	2	moll_55	Plant_3	24 C	69 % RH	Setaria	male	22	7	0.3767	0.0328279	Left	Hindwing	uns	wet	NA	NA	NA	NA	3	0.07433	w	3	2016-12-14	NA
2167	moll	444	India	2	moll_64	Plant_3	24 C	69 % RH	TG3	female	21	7	0.4437	0.0363198	Left	Forewing	uns	wet	NA	NA	NA	NA	4	0.09885	d	4	2016-12-15	NA
2168	moll	444	India	2	moll_64	Plant_3	24 C	69 % RH	TG3	female	21	7	0.4437	0.0363198	Left	Hindwing	uns	wet	NA	NA	NA	NA	4	0.09885	d	4	2016-12-15	NA
2169	moll	446	India	2	moll_62	Plant_3	24 C	69 % RH	TG3	male	21	8	0.4824	0.0373465	Left	Forewing	uns	int	NA	NA	NA	NA	2	0.04792	w	4	2016-12-14	NA
2170	moll	446	India	2	moll_62	Plant_3	24 C	69 % RH	TG3	male	21	8	0.4824	0.0373465	Left	Hindwing	uns	int	NA	NA	NA	NA	2	0.04792	w	4	2016-12-14	NA
2171	moll	449	India	2	moll_93	Plant_3	24 C	69 % RH	Setaria	male	20	8	0.3845	0.0363582	Left	Forewing	uns	wet	NA	NA	NA	0.0813857	4	0.09885	w	4	2016-12-18	0.285282
2172	moll	449	India	2	moll_93	Plant_3	24 C	69 % RH	Setaria	male	20	8	0.3845	0.0363582	Left	Hindwing	uns	wet	103.932	NA	4.7438	0.0813857	4	0.09885	w	4	2016-12-18	0.285282
2173	moll	450	India	2	moll_64	Plant_3	24 C	69 % RH	TG3	male	23	9	0.4332	0.0328979	Left	Forewing	uns	dry	NA	NA	NA	NA	1	0.02026	d	1	2016-12-15	NA
2174	moll	450	India	2	moll_64	Plant_3	24 C	69 % RH	TG3	male	23	9	0.4332	0.0328979	Left	Hindwing	uns	dry	NA	NA	NA	NA	1	0.02026	d	1	2016-12-15	NA
2175	moll	451	India	2	moll_64	Plant_3	24 C	69 % RH	TG3	male	23	8	0.4483	0.0332758	Left	Forewing	uns	wet	NA	NA	NA	0.0641777	3	0.07433	w	4	2016-12-15	0.253333
2176	moll	451	India	2	moll_64	Plant_3	24 C	69 % RH	TG3	male	23	8	0.4483	0.0332758	Left	Hindwing	uns	wet	126.7	NA	8.1801	0.0641777	3	0.07433	w	4	2016-12-15	0.253333
2177	moll	452	India	2	moll_58	Plant_3	24 C	69 % RH	TallG	male	24	10	0.4918	0.0328891	Left	Forewing	uns	dry	NA	NA	NA	NA	1	0.02026	d	0	2016-12-14	NA
2178	moll	452	India	2	moll_58	Plant_3	24 C	69 % RH	TallG	male	24	10	0.4918	0.0328891	Left	Hindwing	uns	dry	NA	NA	NA	NA	1	0.02026	d	0	2016-12-14	NA
2179	moll	453	India	2	moll_60	Plant_3	24 C	69 % RH	LightOpl	male	24	10	0.3971	0.0306259	Left	Forewing	uns	dry	102.456	NA	NA	0.0124649	1	0.02026	d	0	2016-12-14	0.111646
2180	moll	453	India	2	moll_60	Plant_3	24 C	69 % RH	LightOpl	male	24	10	0.3971	0.0306259	Left	Hindwing	uns	dry	124.108	NA	6.4353	0.0124649	1	0.02026	d	0	2016-12-14	0.111646
2181	moll	454	India	2	moll_55	Plant_3	24 C	69 % RH	Setaria	male	25	9	0.4125	0.0297761	Left	Forewing	uns	int	NA	NA	NA	NA	2	0.04792	d	3	2016-12-14	NA
2182	moll	454	India	2	moll_55	Plant_3	24 C	69 % RH	Setaria	male	25	9	0.4125	0.0297761	Left	Hindwing	uns	int	NA	NA	NA	NA	2	0.04792	d	3	2016-12-14	NA
2183	moll	456	India	2	moll_104	Plant_3	24 C	69 % RH	TG3	male	20	6	0.4094	0.0371267	Left	Forewing	uns	wet	NA	NA	NA	NA	4	0.09885	w	4	2016-12-19	NA
2184	moll	456	India	2	moll_104	Plant_3	24 C	69 % RH	TG3	male	20	6	0.4094	0.0371267	Left	Hindwing	uns	wet	NA	NA	NA	NA	4	0.09885	w	4	2016-12-19	NA
2185	moll	458	India	2	moll_62	Plant_3	24 C	69 % RH	TG3	female	25	9	0.3611	0.0284841	Left	Forewing	uns	wet	NA	NA	NA	NA	3	0.07433	d	4	2016-12-14	NA
2186	moll	458	India	2	moll_62	Plant_3	24 C	69 % RH	TG3	female	25	9	0.3611	0.0284841	Left	Hindwing	uns	wet	NA	NA	NA	NA	3	0.07433	d	4	2016-12-14	NA
2187	moll	459	India	2	moll_74	Plant_3	24 C	69 % RH	Setaria	female	25	9	0.4567	0.0308038	Left	Forewing	uns	wet	NA	NA	NA	0.0788207	4	0.09885	w	4	2016-12-15	0.28075
2188	moll	459	India	2	moll_74	Plant_3	24 C	69 % RH	Setaria	female	25	9	0.4567	0.0308038	Left	Hindwing	uns	wet	140.719	NA	9.2376	0.0788207	4	0.09885	w	4	2016-12-15	0.28075
2189	moll	461	India	2	moll_74	Plant_3	24 C	69 % RH	Setaria	female	24	10	0.3907	0.0304605	Left	Forewing	uns	int	NA	NA	NA	NA	2	0.04792	d	3	2016-12-15	NA
2190	moll	461	India	2	moll_74	Plant_3	24 C	69 % RH	Setaria	female	24	10	0.3907	0.0304605	Left	Hindwing	uns	int	NA	NA	NA	NA	2	0.04792	d	3	2016-12-15	NA
2191	moll	462	India	2	moll_82	Plant_3	24 C	69 % RH	Setaria	female	22	8	0.3807	0.0329436	Left	Forewing	uns	wet	NA	NA	NA	NA	4	0.09885	w	4	2016-12-18	NA
2192	moll	462	India	2	moll_82	Plant_3	24 C	69 % RH	Setaria	female	22	8	0.3807	0.0329436	Left	Hindwing	uns	wet	NA	NA	NA	NA	4	0.09885	w	4	2016-12-18	NA
2193	moll	463	India	2	moll_82	Plant_3	24 C	69 % RH	Setaria	male	22	9	0.3764	0.0328191	Left	Forewing	uns	int	NA	NA	NA	NA	2	0.04792	w	2	2016-12-18	NA
2194	moll	463	India	2	moll_82	Plant_3	24 C	69 % RH	Setaria	male	22	9	0.3764	0.0328191	Left	Hindwing	uns	int	NA	NA	NA	NA	2	0.04792	w	2	2016-12-18	NA
2195	moll	464	India	2	moll_64	Plant_3	24 C	69 % RH	TG3	female	25	10	0.4699	0.0310977	Left	Forewing	uns	dry	NA	NA	NA	NA	1	0.02026	d	0	2016-12-15	NA
2196	moll	464	India	2	moll_64	Plant_3	24 C	69 % RH	TG3	female	25	10	0.4699	0.0310977	Left	Hindwing	uns	dry	NA	NA	NA	NA	1	0.02026	d	0	2016-12-15	NA
2197	moll	465	India	2	moll_55	Plant_3	24 C	69 % RH	Setaria	male	27	8	0.3063	0.0249662	Left	Forewing	uns	int	NA	NA	NA	NA	1	0.02026	w	3	2016-12-14	NA
2198	moll	465	India	2	moll_55	Plant_3	24 C	69 % RH	Setaria	male	27	8	0.3063	0.0249662	Left	Hindwing	uns	int	NA	NA	NA	NA	1	0.02026	w	3	2016-12-14	NA
2199	moll	466	India	2	moll_82	Plant_3	24 C	69 % RH	Setaria	female	22	9	0.4243	0.0341561	Left	Forewing	uns	dry	NA	NA	NA	NA	1	0.02026	d	2	2016-12-18	NA
2200	moll	466	India	2	moll_82	Plant_3	24 C	69 % RH	Setaria	female	22	9	0.4243	0.0341561	Left	Hindwing	uns	dry	NA	NA	NA	NA	1	0.02026	d	2	2016-12-18	NA
2201	moll	467	India	2	moll_100	Plant_3	24 C	69 % RH	TG3	male	23	8	0.3169	0.0296424	Left	Forewing	uns	wet	NA	NA	NA	NA	3	0.07433	w	4	2016-12-18	NA
2202	moll	467	India	2	moll_100	Plant_3	24 C	69 % RH	TG3	male	23	8	0.3169	0.0296424	Left	Hindwing	uns	wet	NA	NA	NA	NA	3	0.07433	w	4	2016-12-18	NA
2203	moll	468	India	2	moll_64	Plant_3	24 C	69 % RH	TG3	female	25	8	0.4613	0.0309068	Left	Forewing	uns	wet	NA	NA	NA	NA	3	0.07433	w	4	2016-12-15	NA
2204	moll	468	India	2	moll_64	Plant_3	24 C	69 % RH	TG3	female	25	8	0.4613	0.0309068	Left	Hindwing	uns	wet	NA	NA	NA	NA	3	0.07433	w	4	2016-12-15	NA
2205	moll	469	India	2	moll_58	Plant_3	24 C	69 % RH	TallG	female	27	10	0.4546	0.0284782	Left	Forewing	uns	dry	NA	NA	NA	0.0545748	1	0.02026	d	1	2016-12-14	0.233612
2206	moll	469	India	2	moll_58	Plant_3	24 C	69 % RH	TallG	female	27	10	0.4546	0.0284782	Left	Hindwing	uns	dry	141.239	NA	NA	0.0545748	1	0.02026	d	1	2016-12-14	0.233612
2207	moll	471	India	2	moll_81	Plant_3	24 C	69 % RH	TallG	male	23	9	0.4654	0.0336936	Left	Forewing	uns	dry	94.1829	NA	NA	0.0335008	1	0.02026	d	2	2016-12-17	0.183032
2208	moll	471	India	2	moll_81	Plant_3	24 C	69 % RH	TallG	male	23	9	0.4654	0.0336936	Left	Hindwing	uns	dry	139.779	NA	14.229	0.0335008	1	0.02026	d	2	2016-12-17	0.183032
2209	moll	472	India	2	moll_68	Plant_3	24 C	69 % RH	BG	male	27	9	0.3849	0.0269413	Left	Forewing	uns	dry	NA	NA	NA	NA	1	0.02026	d	2	2016-12-15	NA
2210	moll	472	India	2	moll_68	Plant_3	24 C	69 % RH	BG	male	27	9	0.3849	0.0269413	Left	Hindwing	uns	dry	NA	NA	NA	NA	1	0.02026	d	2	2016-12-15	NA
2211	moll	473	India	2	moll_91	Plant_3	24 C	69 % RH	CY	female	24	7	0.3168	0.0284043	Left	Forewing	uns	wet	NA	NA	NA	NA	4	0.09885	w	4	2016-12-18	NA
2212	moll	473	India	2	moll_91	Plant_3	24 C	69 % RH	CY	female	24	7	0.3168	0.0284043	Left	Hindwing	uns	wet	NA	NA	NA	NA	4	0.09885	w	4	2016-12-18	NA
2213	moll	474	India	2	moll_81	Plant_3	24 C	69 % RH	TallG	male	23	9	0.3869	0.0316815	Left	Forewing	uns	dry	NA	NA	NA	NA	1	0.02026	d	2	2016-12-17	NA
2214	moll	474	India	2	moll_81	Plant_3	24 C	69 % RH	TallG	male	23	9	0.3869	0.0316815	Left	Hindwing	uns	dry	NA	NA	NA	NA	1	0.02026	d	2	2016-12-17	NA
2215	moll	475	India	2	moll_60	Plant_3	24 C	69 % RH	LightOpl	female	27	10	0.3373	0.0257815	Left	Forewing	uns	dry	NA	NA	NA	0.0127962	1	0.02026	d	1	2016-12-14	0.11312
2216	moll	475	India	2	moll_60	Plant_3	24 C	69 % RH	LightOpl	female	27	10	0.3373	0.0257815	Left	Hindwing	uns	dry	115.69	NA	10.8769	0.0127962	1	0.02026	d	1	2016-12-14	0.11312
2217	moll	476	India	2	moll_60	Plant_3	24 C	69 % RH	LightOpl	male	26	10	0.4118	0.0286147	Left	Forewing	uns	dry	100.32	NA	NA	0.0184188	1	0.02026	d	2	2016-12-14	0.135716
2218	moll	476	India	2	moll_60	Plant_3	24 C	69 % RH	LightOpl	male	26	10	0.4118	0.0286147	Left	Hindwing	uns	dry	122.956	NA	NA	0.0184188	1	0.02026	d	2	2016-12-14	0.135716
2219	moll	477	India	2	moll_84	Plant_3	24 C	69 % RH	BG	female	24	9	0.449	0.0319059	Left	Forewing	uns	int	NA	NA	NA	0.0496396	2	0.04792	d	2	2016-12-18	0.2228
2220	moll	477	India	2	moll_84	Plant_3	24 C	69 % RH	BG	female	24	9	0.449	0.0319059	Left	Hindwing	uns	int	125.436	NA	NA	0.0496396	2	0.04792	d	2	2016-12-18	0.2228
2221	moll	480	India	2	moll_84	Plant_3	24 C	69 % RH	BG	female	24	9	0.4305	0.0314615	Left	Forewing	uns	wet	NA	NA	NA	NA	3	0.07433	d	3	2016-12-18	NA
2222	moll	480	India	2	moll_84	Plant_3	24 C	69 % RH	BG	female	24	9	0.4305	0.0314615	Left	Hindwing	uns	wet	NA	NA	NA	NA	3	0.07433	d	3	2016-12-18	NA
2223	moll	481	India	2	moll_56	Plant_3	24 C	69 % RH	MatBG	female	28	9	0.3867	0.0260196	Left	Forewing	uns	int	NA	NA	NA	NA	2	0.04792	d	3	2016-12-14	NA
2224	moll	481	India	2	moll_56	Plant_3	24 C	69 % RH	MatBG	female	28	9	0.3867	0.0260196	Left	Hindwing	uns	int	NA	NA	NA	NA	2	0.04792	d	3	2016-12-14	NA
2225	moll	482	India	2	moll_65	Plant_3	24 C	69 % RH	SwOp	female	27	9	0.3703	0.0265963	Left	Forewing	uns	wet	NA	NA	NA	0.074243	3	0.07433	w	3	2016-12-15	0.272476
2226	moll	482	India	2	moll_65	Plant_3	24 C	69 % RH	SwOp	female	27	9	0.3703	0.0265963	Left	Hindwing	uns	wet	125.792	NA	11.6233	0.074243	3	0.07433	w	3	2016-12-15	0.272476
2227	moll	483	India	2	moll_55	Plant_3	24 C	69 % RH	Setaria	female	29	8	0.2835	0.0226527	Left	Forewing	uns	int	NA	NA	NA	NA	2	0.04792	d	3	2016-12-14	NA
2228	moll	483	India	2	moll_55	Plant_3	24 C	69 % RH	Setaria	female	29	8	0.2835	0.0226527	Left	Hindwing	uns	int	NA	NA	NA	NA	2	0.04792	d	3	2016-12-14	NA
2229	moll	486	India	2	moll_81	Plant_3	24 C	69 % RH	TallG	male	26	10	0.5779	0.0320364	Left	Forewing	uns	dry	NA	NA	NA	NA	1	0.02026	w	1	2016-12-17	NA
2230	moll	486	India	2	moll_81	Plant_3	24 C	69 % RH	TallG	male	26	10	0.5779	0.0320364	Left	Hindwing	uns	dry	NA	NA	NA	NA	1	0.02026	w	1	2016-12-17	NA
2231	moll	488	India	2	moll_60	Plant_3	24 C	69 % RH	LightOpl	female	28	10	0.3736	0.0257224	Left	Forewing	uns	dry	NA	NA	NA	0.0126522	1	0.02026	d	2	2016-12-14	0.112482
2232	moll	488	India	2	moll_60	Plant_3	24 C	69 % RH	LightOpl	female	28	10	0.3736	0.0257224	Left	Hindwing	uns	dry	108.163	NA	5.6556	0.0126522	1	0.02026	d	2	2016-12-14	0.112482
2233	moll	489	India	2	moll_82	Plant_3	24 C	69 % RH	Setaria	male	25	8	0.2965	0.0266728	Left	Forewing	uns	dry	NA	NA	NA	0.0212941	1	0.02026	d	1	2016-12-18	0.145925
2234	moll	489	India	2	moll_82	Plant_3	24 C	69 % RH	Setaria	male	25	8	0.2965	0.0266728	Left	Hindwing	uns	dry	99.4736	NA	8.5322	0.0212941	1	0.02026	d	1	2016-12-18	0.145925
2235	moll	490	India	2	moll_89	Plant_3	24 C	69 % RH	BG	male	25	9	0.4692	0.0310823	Left	Forewing	uns	dry	NA	NA	NA	NA	1	0.02026	d	1	2016-12-18	NA
2236	moll	490	India	2	moll_89	Plant_3	24 C	69 % RH	BG	male	25	9	0.4692	0.0310823	Left	Hindwing	uns	dry	NA	NA	NA	NA	1	0.02026	d	1	2016-12-18	NA
2237	moll	491	India	2	moll_91	Plant_3	24 C	69 % RH	CY	female	25	8	0.3526	0.0282588	Left	Forewing	uns	wet	NA	NA	NA	NA	3	0.07433	w	4	2016-12-18	NA
2238	moll	491	India	2	moll_91	Plant_3	24 C	69 % RH	CY	female	25	8	0.3526	0.0282588	Left	Hindwing	uns	wet	NA	NA	NA	NA	3	0.07433	w	4	2016-12-18	NA
2239	moll	492	India	2	moll_88	Plant_3	24 C	69 % RH	LightOpl	female	25	8	0.3351	0.0277834	Left	Forewing	uns	int	NA	NA	NA	NA	2	0.04792	d	3	2016-12-18	NA
2240	moll	492	India	2	moll_88	Plant_3	24 C	69 % RH	LightOpl	female	25	8	0.3351	0.0277834	Left	Hindwing	uns	int	NA	NA	NA	NA	2	0.04792	d	3	2016-12-18	NA
2241	moll	505	India	2	moll_104	Plant_3	24 C	69 % RH	TG3	female	25	10	0.4524	0.0307068	Left	Forewing	uns	dry	NA	NA	NA	NA	1	0.02026	d	0	2016-12-19	NA
2242	moll	505	India	2	moll_104	Plant_3	24 C	69 % RH	TG3	female	25	10	0.4524	0.0307068	Left	Hindwing	uns	dry	NA	NA	NA	NA	1	0.02026	d	0	2016-12-19	NA
2243	moll	507	India	2	moll_66	Plant_3	24 C	69 % RH	ItG	female	29	10	0.5165	0.0276668	Left	Forewing	uns	dry	NA	NA	NA	NA	1	0.02026	d	0	2016-12-15	NA
2244	moll	507	India	2	moll_66	Plant_3	24 C	69 % RH	ItG	female	29	10	0.5165	0.0276668	Left	Hindwing	uns	dry	NA	NA	NA	NA	1	0.02026	d	0	2016-12-15	NA
2245	moll	508	India	2	moll_60	Plant_3	24 C	69 % RH	LightOpl	male	30	9	0.3729	0.0239925	Left	Forewing	uns	dry	99.1578	NA	NA	0.00574701	1	0.02026	d	0	2016-12-14	0.0758091
2246	moll	508	India	2	moll_60	Plant_3	24 C	69 % RH	LightOpl	male	30	9	0.3729	0.0239925	Left	Hindwing	uns	dry	126.988	NA	11.2626	0.00574701	1	0.02026	d	0	2016-12-14	0.0758091
2247	moll	509	India	2	moll_53	Plant_3	24 C	69 % RH	Opl	female	31	7	0.3791	0.0233466	Left	Forewing	uns	wet	NA	NA	NA	NA	4	0.09885	w	4	2016-12-14	NA
2248	moll	509	India	2	moll_53	Plant_3	24 C	69 % RH	Opl	female	31	7	0.3791	0.0233466	Left	Hindwing	uns	wet	NA	NA	NA	NA	4	0.09885	w	4	2016-12-14	NA
2249	moll	511	India	2	moll_91	Plant_3	24 C	69 % RH	CY	female	26	8	0.4524	0.0295257	Left	Forewing	uns	wet	NA	NA	NA	NA	4	0.09885	w	4	2016-12-18	NA
2250	moll	511	India	2	moll_91	Plant_3	24 C	69 % RH	CY	female	26	8	0.4524	0.0295257	Left	Hindwing	uns	wet	NA	NA	NA	NA	4	0.09885	w	4	2016-12-18	NA
2251	moll	512	India	2	moll_88	Plant_3	24 C	69 % RH	LightOpl	male	26	11	0.474	0.0299884	Left	Forewing	uns	dry	NA	NA	NA	0	1	0.02026	d	0	2016-12-18	0
2252	moll	512	India	2	moll_88	Plant_3	24 C	69 % RH	LightOpl	male	26	11	0.474	0.0299884	Left	Hindwing	uns	dry	133.905	NA	NA	0	1	0.02026	d	0	2016-12-18	0
2253	moll	513	India	2	moll_66	Plant_3	24 C	69 % RH	ItG	male	30	10	0.5249	0.0268888	Left	Forewing	uns	dry	NA	NA	NA	NA	1	0.02026	d	3	2016-12-15	NA
2254	moll	513	India	2	moll_66	Plant_3	24 C	69 % RH	ItG	male	30	10	0.5249	0.0268888	Left	Hindwing	uns	dry	NA	NA	NA	NA	1	0.02026	d	3	2016-12-15	NA
2255	moll	514	India	2	moll_91	Plant_3	24 C	69 % RH	CY	male	28	8	0.232	0.0219451	Left	Forewing	uns	wet	NA	NA	NA	NA	NA	NA	NA	NA	2016-12-18	NA
2256	moll	514	India	2	moll_91	Plant_3	24 C	69 % RH	CY	male	28	8	0.232	0.0219451	Left	Hindwing	uns	wet	NA	NA	NA	NA	NA	NA	NA	NA	2016-12-18	NA
2257	moll	516	India	2	moll_53	Plant_3	24 C	69 % RH	Opl	male	32	9	0.3706	0.0224467	Left	Forewing	uns	int	NA	NA	NA	NA	2	0.04792	w	2	2016-12-14	NA
2258	moll	516	India	2	moll_53	Plant_3	24 C	69 % RH	Opl	male	32	9	0.3706	0.0224467	Left	Hindwing	uns	int	NA	NA	NA	NA	2	0.04792	w	2	2016-12-14	NA
2259	moll	518	India	2	moll_53	Plant_3	24 C	69 % RH	Opl	male	32	9	0.3453	0.0219238	Left	Forewing	uns	dry	NA	NA	NA	NA	1	0.02026	d	1	2016-12-14	NA
2260	moll	518	India	2	moll_53	Plant_3	24 C	69 % RH	Opl	male	32	9	0.3453	0.0219238	Left	Hindwing	uns	dry	NA	NA	NA	NA	1	0.02026	d	1	2016-12-14	NA
2261	moll	519	India	2	moll_110	Plant_3	24 C	69 % RH	ThinG	female	27	9	0.2901	0.024518	Left	Forewing	uns	dry	NA	NA	NA	NA	1	0.02026	d	2	2016-12-19	NA
2262	moll	519	India	2	moll_110	Plant_3	24 C	69 % RH	ThinG	female	27	9	0.2901	0.024518	Left	Hindwing	uns	dry	NA	NA	NA	NA	1	0.02026	d	2	2016-12-19	NA
2263	moll	520	India	2	moll_56	Plant_3	24 C	69 % RH	MatBG	male	32	8	0.3741	0.0225171	Left	Forewing	uns	int	NA	NA	NA	NA	2	0.04792	d	2	2016-12-14	NA
2264	moll	520	India	2	moll_56	Plant_3	24 C	69 % RH	MatBG	male	32	8	0.3741	0.0225171	Left	Hindwing	uns	int	NA	NA	NA	NA	2	0.04792	d	2	2016-12-14	NA
2265	moll	521	India	2	moll_107	Plant_3	24 C	69 % RH	GrTG	female	28	8	0.4217	0.026782	Left	Forewing	uns	int	NA	NA	NA	NA	2	0.04792	d	3	2016-12-19	NA
2266	moll	521	India	2	moll_107	Plant_3	24 C	69 % RH	GrTG	female	28	8	0.4217	0.026782	Left	Hindwing	uns	int	NA	NA	NA	NA	2	0.04792	d	3	2016-12-19	NA
2267	moll	522	India	2	moll_71	Plant_3	24 C	69 % RH	ItG	male	32	11	0.3704	0.0224426	Left	Forewing	uns	dry	NA	NA	NA	NA	1	0.02026	d	0	2016-12-15	NA
2268	moll	522	India	2	moll_71	Plant_3	24 C	69 % RH	ItG	male	32	11	0.3704	0.0224426	Left	Hindwing	uns	dry	NA	NA	NA	NA	1	0.02026	d	0	2016-12-15	NA
2269	moll	523	India	2	moll_71	Plant_3	24 C	69 % RH	ItG	female	33	10	0.3983	0.0222958	Left	Forewing	uns	dry	104.488	NA	NA	0.0577544	1	0.02026	d	1	2016-12-15	0.240322
2271	moll	524	India	2	moll_75	Plant_3	24 C	69 % RH	Opl	male	33	9	0.3169	0.0206598	Left	Forewing	uns	int	NA	NA	NA	NA	2	0.04792	w	3	2016-12-15	NA
2272	moll	524	India	2	moll_75	Plant_3	24 C	69 % RH	Opl	male	33	9	0.3169	0.0206598	Left	Hindwing	uns	int	NA	NA	NA	NA	2	0.04792	w	3	2016-12-15	NA
2273	moll	525	India	2	moll_94	Plant_3	24 C	69 % RH	TG	female	30	9	0.3533	0.0235646	Left	Forewing	uns	dry	NA	NA	NA	NA	1	0.02026	d	3	2016-12-18	NA
2274	moll	525	India	2	moll_94	Plant_3	24 C	69 % RH	TG	female	30	9	0.3533	0.0235646	Left	Hindwing	uns	dry	NA	NA	NA	NA	1	0.02026	d	3	2016-12-18	NA
2275	moll	526	India	2	moll_107	Plant_3	24 C	69 % RH	GrTG	female	29	8	0.3352	0.0239536	Left	Forewing	uns	int	NA	NA	NA	NA	2	0.04792	d	3	2016-12-19	NA
2276	moll	526	India	2	moll_107	Plant_3	24 C	69 % RH	GrTG	female	29	8	0.3352	0.0239536	Left	Hindwing	uns	int	NA	NA	NA	NA	2	0.04792	d	3	2016-12-19	NA
2277	moll	528	India	2	moll_56	Plant_3	24 C	69 % RH	MatBG	male	35	9	0.4088	0.0212049	Left	Forewing	uns	dry	NA	NA	NA	NA	1	0.02026	d	0	2016-12-14	NA
2278	moll	528	India	2	moll_56	Plant_3	24 C	69 % RH	MatBG	male	35	9	0.4088	0.0212049	Left	Hindwing	uns	dry	NA	NA	NA	NA	1	0.02026	d	0	2016-12-14	NA
2279	moll	530	India	2	moll_63	Plant_3	24 C	69 % RH	ThinG	female	34	10	0.448	0.0225051	Left	Forewing	uns	dry	NA	NA	NA	NA	1	0.02026	d	0	2016-12-15	NA
2280	moll	530	India	2	moll_63	Plant_3	24 C	69 % RH	ThinG	female	34	10	0.448	0.0225051	Left	Hindwing	uns	dry	NA	NA	NA	NA	1	0.02026	d	0	2016-12-15	NA
2281	moll	533	India	2	moll_66	Plant_3	24 C	69 % RH	ItG	female	36	10	0.5608	0.0229069	Left	Forewing	uns	dry	NA	NA	NA	0.00759861	1	0.02026	d	0	2016-12-15	0.08717
2282	moll	533	India	2	moll_66	Plant_3	24 C	69 % RH	ItG	female	36	10	0.5608	0.0229069	Left	Hindwing	uns	dry	159.305	NA	NA	0.00759861	1	0.02026	d	0	2016-12-15	0.08717
2283	moll	534	India	2	moll_71	Plant_3	24 C	69 % RH	ItG	male	36	9	0.3919	0.0203277	Left	Forewing	uns	dry	NA	NA	NA	NA	1	0.02026	d	0	2016-12-15	NA
2284	moll	534	India	2	moll_71	Plant_3	24 C	69 % RH	ItG	male	36	9	0.3919	0.0203277	Left	Hindwing	uns	dry	NA	NA	NA	NA	1	0.02026	d	0	2016-12-15	NA
2285	moll	536	India	2	moll_99	Plant_3	24 C	69 % RH	ThinG	female	NA	8	0.2683	NA	Left	Forewing	uns	int	NA	NA	NA	NA	2	0.04792	w	3	2017-12-18	NA
2286	moll	536	India	2	moll_99	Plant_3	24 C	69 % RH	ThinG	female	NA	8	0.2683	NA	Left	Hindwing	uns	int	NA	NA	NA	NA	2	0.04792	w	3	2017-12-18	NA
2287	moll	546	India	2	moll_105	Plant_3	24 C	69 % RH	GrTG	male	37	10	0.2556	0.0171522	Left	Forewing	uns	int	NA	NA	NA	NA	2	0.04792	d	1	2016-12-19	NA
2288	moll	546	India	2	moll_105	Plant_3	24 C	69 % RH	GrTG	male	37	10	0.2556	0.0171522	Left	Hindwing	uns	int	NA	NA	NA	NA	2	0.04792	d	1	2016-12-19	NA
2289	moll	547	India	2	moll_83	Plant_3	24 C	69 % RH	TG	male	38	9	0.2556	0.0167008	Left	Forewing	uns	dry	NA	NA	NA	0.00578344	1	0.02026	d	0	2016-12-18	0.0760489
2290	moll	547	India	2	moll_83	Plant_3	24 C	69 % RH	TG	male	38	9	0.2556	0.0167008	Left	Hindwing	uns	dry	105.353	NA	10.5924	0.00578344	1	0.02026	d	0	2016-12-18	0.0760489
2291	moll	548	India	2	moll_71	Plant_3	24 C	69 % RH	ItG	female	41	9	0.43	0.0184094	Left	Forewing	uns	dry	NA	NA	NA	NA	1	0.02026	d	1	2016-12-15	NA
2292	moll	548	India	2	moll_71	Plant_3	24 C	69 % RH	ItG	female	41	9	0.43	0.0184094	Left	Hindwing	uns	dry	NA	NA	NA	NA	1	0.02026	d	1	2016-12-15	NA
2293	moll	549	India	2	moll_105	Plant_3	24 C	69 % RH	GrTG	male	39	8	0.4296	0.0193474	Left	Forewing	uns	dry	NA	NA	NA	NA	1	0.02026	d	0	2016-12-19	NA
2294	moll	549	India	2	moll_105	Plant_3	24 C	69 % RH	GrTG	male	39	8	0.4296	0.0193474	Left	Hindwing	uns	dry	NA	NA	NA	NA	1	0.02026	d	0	2016-12-19	NA
2295	moll	550	India	2	moll_83	Plant_3	24 C	69 % RH	TG	male	40	8	0.317	0.0170462	Left	Forewing	uns	dry	83.3674	NA	NA	0.0070008	1	0.02026	d	0	2016-12-18	0.0836708
2296	moll	550	India	2	moll_83	Plant_3	24 C	69 % RH	TG	male	40	8	0.317	0.0170462	Left	Hindwing	uns	dry	111.573	NA	8.9288	0.0070008	1	0.02026	d	0	2016-12-18	0.0836708
2297	moll	566	India	2	moll_121	Plant_4	24 C	69 % RH	CY	female	23	8	0.297	0.0290084	Left	Forewing	uns	wet	NA	NA	1.0015	0.113872	4	0.09885	w	4	2017-04-21	0.33745
2298	moll	566	India	2	moll_121	Plant_4	24 C	69 % RH	CY	female	23	8	0.297	0.0290084	Left	Hindwing	uns	wet	103.449	NA	6.4272	0.113872	4	0.09885	w	4	2017-04-21	0.33745
2305	moll	600	India	2	moll_122	Plant_4	24 C	69 % RH	GrTG	female	39	8	0.3995	0.0188846	Left	Forewing	uns	wet	NA	NA	NA	0.0624734	3	0.07433	w	4	2017-04-21	0.249947
2306	moll	600	India	2	moll_122	Plant_4	24 C	69 % RH	GrTG	female	39	8	0.3995	0.0188846	Left	Hindwing	uns	wet	136.063	NA	5.9129	0.0624734	3	0.07433	w	4	2017-04-21	0.249947
2307	moll	601	India	2	moll_129	Plant_4	24 C	69 % RH	Setaria	male	20	NA	0.4288	0.0377041	Left	Forewing	uns	wet	116.438	NA	1.7104	0.0699471	3	0.07433	w	4	2017-05-12	0.264475
2308	moll	601	India	2	moll_129	Plant_4	24 C	69 % RH	Setaria	male	20	NA	0.4288	0.0377041	Left	Hindwing	uns	wet	130.63	NA	11.5476	0.0699471	3	0.07433	w	4	2017-05-12	0.264475
2309	moll	603	India	2	moll_130	Plant_4	24 C	69 % RH	CY	female	17	NA	0.4907	0.046397	Left	Forewing	uns	wet	134.739	NA	3.2307	0.102013	4	0.09885	w	4	2017-05-18	0.319394
2310	moll	603	India	2	moll_130	Plant_4	24 C	69 % RH	CY	female	17	NA	0.4907	0.046397	Left	Hindwing	uns	wet	147.307	NA	14.4749	0.102013	4	0.09885	w	4	2017-05-18	0.319394
2311	moll	604	India	2	moll_131	Plant_4	24 C	69 % RH	CY	female	19	NA	0.3445	0.0368957	Left	Forewing	uns	wet	98.2853	NA	1.1548	0.0893536	3	0.07433	w	4	2017-05-18	0.298921
2312	moll	604	India	2	moll_131	Plant_4	24 C	69 % RH	CY	female	19	NA	0.3445	0.0368957	Left	Hindwing	uns	wet	110.241	NA	8.6918	0.0893536	3	0.07433	w	4	2017-05-18	0.298921
2313	moll	605	India	2	moll_131	Plant_4	24 C	69 % RH	CY	male	20	7	0.2905	0.0331145	Left	Forewing	uns	wet	89.8268	NA	0.5465	0.0701423	3	0.07433	w	4	2017-05-18	0.264844
2314	moll	605	India	2	moll_131	Plant_4	24 C	69 % RH	CY	male	20	7	0.2905	0.0331145	Left	Hindwing	uns	wet	103.152	NA	5.1415	0.0701423	3	0.07433	w	4	2017-05-18	0.264844
2315	moll	606	India	2	moll_130	Plant_4	24 C	69 % RH	CY	female	20	NA	0.3721	0.0359631	Left	Forewing	uns	wet	111.387	NA	2.0097	0.0945633	4	0.09885	w	4	2017-05-18	0.307512
2316	moll	606	India	2	moll_130	Plant_4	24 C	69 % RH	CY	female	20	NA	0.3721	0.0359631	Left	Hindwing	uns	wet	120.91	NA	10.0096	0.0945633	4	0.09885	w	4	2017-05-18	0.307512
2317	moll	607	India	2	moll_130	Plant_4	24 C	69 % RH	CY	female	20	NA	0.467	0.038792	Left	Forewing	uns	wet	115.677	NA	1.9777	0.0768109	3	0.07433	w	4	2017-05-18	0.277148
2318	moll	607	India	2	moll_130	Plant_4	24 C	69 % RH	CY	female	20	NA	0.467	0.038792	Left	Hindwing	uns	wet	130.552	NA	10.7	0.0768109	3	0.07433	w	4	2017-05-18	0.277148
2319	moll	608	India	2	moll_122	Plant_4	24 C	69 % RH	GrTG	male	21	9	0.4215	0.0147015	Left	Forewing	uns	int	122.058	NA	3.0261	0.0408778	2	0.04792	d	3	2017-04-21	0.202182
2320	moll	608	India	2	moll_122	Plant_4	24 C	69 % RH	GrTG	male	21	9	0.4215	0.0147015	Left	Hindwing	uns	int	138.826	NA	15.6474	0.0408778	2	0.04792	d	3	2017-04-21	0.202182
2321	moll	609	India	2	moll_124	Plant_4	24 C	69 % RH	Bamb	female	44	9	0.3714	0.0163366	Left	Forewing	uns	int	115.345	NA	3.4691	0.0468665	2	0.04792	d	3	2017-04-26	0.216487
2322	moll	609	India	2	moll_124	Plant_4	24 C	69 % RH	Bamb	female	44	9	0.3714	0.0163366	Left	Hindwing	uns	int	126.141	NA	13.3842	0.0468665	2	0.04792	d	3	2017-04-26	0.216487
2325	moll	611	India	2	moll_134	Plant_4	24 C	69 % RH	ThinG	male	17	9	0.3622	0.0419309	Left	Forewing	uns	wet	102.662	NA	1.1643	0.0805149	3	0.07433	w	4	2017-05-26	0.283752
2326	moll	611	India	2	moll_134	Plant_4	24 C	69 % RH	ThinG	male	17	9	0.3622	0.0419309	Left	Hindwing	uns	wet	116.603	NA	9.2302	0.0805149	3	0.07433	w	4	2017-05-26	0.283752
2327	moll	612	India	2	moll_134	Plant_4	24 C	69 % RH	ThinG	male	18	10	0.4247	0.0417595	Left	Forewing	uns	wet	113.808	NA	1.574	0.0583208	3	0.07433	w	4	2017-05-26	0.241497
2328	moll	612	India	2	moll_134	Plant_4	24 C	69 % RH	ThinG	male	18	10	0.4247	0.0417595	Left	Hindwing	uns	wet	129.611	NA	11.4876	0.0583208	3	0.07433	w	4	2017-05-26	0.241497
2329	moll	614	India	2	moll_134	Plant_4	24 C	69 % RH	ThinG	female	21	9	0.3704	0.0341983	Left	Forewing	uns	wet	108.818	NA	2.6671	0.0553915	3	0.07433	w	3	2017-05-26	0.235354
2330	moll	614	India	2	moll_134	Plant_4	24 C	69 % RH	ThinG	female	21	9	0.3704	0.0341983	Left	Hindwing	uns	wet	122.681	NA	12.6809	0.0553915	3	0.07433	w	3	2017-05-26	0.235354
2331	moll	615	India	2	moll_134	Plant_4	24 C	69 % RH	TG3	male	23	8	0.3598	0.0309238	Left	Forewing	uns	wet	93.6347	NA	2.0703	0.0632944	3	0.07433	d	4	2017-05-26	0.251584
2332	moll	615	India	2	moll_134	Plant_4	24 C	69 % RH	TG3	male	23	8	0.3598	0.0309238	Left	Hindwing	uns	wet	101.352	NA	9.9328	0.0632944	3	0.07433	d	4	2017-05-26	0.251584
2333	moll	616	India	2	moll_132	Plant_4	24 C	69 % RH	TallG	male	23	8	0.4825	0.0341013	Left	Forewing	uns	wet	117.757	NA	1.3224	0.0752047	3	0.07433	w	4	2017-05-25	0.274235
2334	moll	616	India	2	moll_132	Plant_4	24 C	69 % RH	TallG	male	23	8	0.4825	0.0341013	Left	Hindwing	uns	wet	134.095	NA	9.8985	0.0752047	3	0.07433	w	4	2017-05-25	0.274235
2335	moll	617	India	2	moll_139	Plant_4	24 C	69 % RH	TallG	male	23	9	0.5694	0.0360367	Left	Forewing	uns	wet	138.081	NA	2.3021	0.0478467	3	0.07433	w	4	2017-05-28	0.218739
2336	moll	617	India	2	moll_139	Plant_4	24 C	69 % RH	TallG	male	23	9	0.5694	0.0360367	Left	Hindwing	uns	wet	158.985	NA	13.3232	0.0478467	3	0.07433	w	4	2017-05-28	0.218739
2337	moll	618	India	2	moll_143	Plant_4	24 C	69 % RH	Setaria	male	20	NA	0.2928	0.0332017	Left	Forewing	uns	wet	82.7467	NA	1.0947	0.0730072	3	0.07433	w	4	2017-05-30	0.270198
2338	moll	618	India	2	moll_143	Plant_4	24 C	69 % RH	Setaria	male	20	NA	0.2928	0.0332017	Left	Hindwing	uns	wet	97.8657	NA	7.1522	0.0730072	3	0.07433	w	4	2017-05-30	0.270198
2339	moll	619	India	2	moll_132	Plant_4	24 C	69 % RH	TallG	male	25	NA	0.485	0.0314273	Left	Forewing	uns	wet	123.822	NA	3.2594	0.062513	3	0.07433	w	4	2017-05-25	0.250026
2340	moll	619	India	2	moll_132	Plant_4	24 C	69 % RH	TallG	male	25	NA	0.485	0.0314273	Left	Hindwing	uns	wet	142.055	NA	14.2856	0.062513	3	0.07433	w	4	2017-05-25	0.250026
2343	moll	620	India	2	moll_139	Plant_4	24 C	69 % RH	TallG	male	23	9	0.4886	0.0342444	Left	Forewing	uns	int	115.81	NA	2.1338	0.0504003	2	0.04792	w	3	2017-05-28	0.2245
2344	moll	620	India	2	moll_139	Plant_4	24 C	69 % RH	TallG	male	23	9	0.4886	0.0342444	Left	Hindwing	uns	int	139.12	NA	11.6879	0.0504003	2	0.04792	w	3	2017-05-28	0.2245
2345	moll	621	India	2	moll_133	Plant_4	24 C	69 % RH	MatBG	male	26	9	0.5074	0.0306768	Left	Forewing	uns	int	122.844	NA	2.4055	0.0443631	2	0.04792	w	4	2017-05-25	0.210625
2346	moll	621	India	2	moll_133	Plant_4	24 C	69 % RH	MatBG	male	26	9	0.5074	0.0306768	Left	Hindwing	uns	int	143.766	NA	11.7235	0.0443631	2	0.04792	w	4	2017-05-25	0.210625
2347	moll	622	India	2	moll_140	Plant_4	24 C	69 % RH	TG3	female	23	8	0.5163	0.0348797	Left	Forewing	uns	wet	135.066	NA	2.6004	0.0843798	3	0.07433	w	4	2017-05-29	0.290482
2348	moll	622	India	2	moll_140	Plant_4	24 C	69 % RH	TG3	female	23	8	0.5163	0.0348797	Left	Hindwing	uns	wet	148.147	NA	12.7256	0.0843798	3	0.07433	w	4	2017-05-29	0.290482
2349	moll	624	India	2	moll_133	Plant_4	24 C	69 % RH	MatBG	female	26	9	0.4435	0.0293308	Left	Forewing	uns	wet	126.582	NA	2.8471	0.059418	3	0.07433	w	4	2017-05-25	0.243758
2350	moll	624	India	2	moll_133	Plant_4	24 C	69 % RH	MatBG	female	26	9	0.4435	0.0293308	Left	Hindwing	uns	wet	146.681	NA	13.3495	0.059418	3	0.07433	w	4	2017-05-25	0.243758
2351	moll	625	India	2	moll_136	Plant_4	24 C	69 % RH	MatBG	male	23	9	0.4725	0.0338641	Left	Forewing	uns	wet	132.254	NA	2.8372	0.0865297	3	0.07433	w	4	2017-05-28	0.294159
2352	moll	625	India	2	moll_136	Plant_4	24 C	69 % RH	MatBG	male	23	9	0.4725	0.0338641	Left	Hindwing	uns	wet	139.071	NA	11.3664	0.0865297	3	0.07433	w	4	2017-05-28	0.294159
2353	moll	626	India	2	moll_133	Plant_4	24 C	69 % RH	MatBG	female	27	NA	0.5645	0.0306096	Left	Forewing	uns	int	137.79	NA	3.7261	0.0499991	2	0.04792	d	3	2017-05-25	0.223605
2354	moll	626	India	2	moll_133	Plant_4	24 C	69 % RH	MatBG	female	27	NA	0.5645	0.0306096	Left	Hindwing	uns	int	158.477	NA	16.1019	0.0499991	2	0.04792	d	3	2017-05-25	0.223605
2355	moll	627	India	2	moll_139	Plant_4	24 C	69 % RH	TallG	female	23	9	0.4544	0.033426	Left	Forewing	uns	wet	129.666	NA	2.3155	0.084576	3	0.07433	w	4	2017-05-28	0.29082
2356	moll	627	India	2	moll_139	Plant_4	24 C	69 % RH	TallG	female	23	9	0.4544	0.033426	Left	Hindwing	uns	wet	145.481	NA	13.8432	0.084576	3	0.07433	w	4	2017-05-28	0.29082
2359	moll	630	India	2	moll_132	Plant_4	24 C	69 % RH	TallG	female	27	NA	0.5448	0.0302493	Left	Forewing	uns	wet	145.937	NA	3.1939	0.103123	4	0.09885	w	3	2017-05-25	0.321128
2360	moll	630	India	2	moll_132	Plant_4	24 C	69 % RH	TallG	female	27	NA	0.5448	0.0302493	Left	Hindwing	uns	wet	159.25	NA	13.9587	0.103123	4	0.09885	w	3	2017-05-25	0.321128
2361	moll	631	India	2	moll_169	Plant_4	24 C	69 % RH	ItG	female	16	10	0.4922	0.049347	Left	Forewing	uns	wet	129.685	NA	3.2085	0.0747389	3	0.07433	w	4	2017-06-07	0.273384
2362	moll	631	India	2	moll_169	Plant_4	24 C	69 % RH	ItG	female	16	10	0.4922	0.049347	Left	Hindwing	uns	wet	150.861	NA	15.4441	0.0747389	3	0.07433	w	4	2017-06-07	0.273384
2363	moll	632	India	2	moll_143	Plant_4	24 C	69 % RH	Setaria	male	24	8	0.4052	0.0308327	Left	Forewing	uns	wet	113.662	NA	1.7735	0.0764749	3	0.07433	w	3	2017-05-30	0.276541
2364	moll	632	India	2	moll_143	Plant_4	24 C	69 % RH	Setaria	male	24	8	0.4052	0.0308327	Left	Hindwing	uns	wet	136.13	NA	11.8213	0.0764749	3	0.07433	w	3	2017-05-30	0.276541
2365	moll	633	India	2	moll_132	Plant_4	24 C	69 % RH	TallG	male	30	9	0.362	0.0237565	Left	Forewing	uns	wet	107.637	NA	1.4309	0.0677251	3	0.07433	w	3	2017-05-25	0.260241
2366	moll	633	India	2	moll_132	Plant_4	24 C	69 % RH	TallG	male	30	9	0.362	0.0237565	Left	Hindwing	uns	wet	117.256	NA	7.8684	0.0677251	3	0.07433	w	3	2017-05-25	0.260241
2367	moll	634	India	2	moll_135	Plant_4	24 C	69 % RH	ItG	male	27	NA	0.4716	0.0288289	Left	Forewing	uns	wet	126.39	NA	2.8945	0.0477086	3	0.07433	w	3	2017-05-26	0.218423
2368	moll	634	India	2	moll_135	Plant_4	24 C	69 % RH	ItG	male	27	NA	0.4716	0.0288289	Left	Hindwing	uns	wet	149.034	NA	13.8426	0.0477086	3	0.07433	w	3	2017-05-26	0.218423
2369	moll	635	India	2	moll_135	Plant_4	24 C	69 % RH	ItG	male	29	9	0.3734	0.024831	Left	Forewing	uns	int	84.3856	NA	2.306	0.0283782	2	0.04792	d	3	2017-05-26	0.168458
2370	moll	635	India	2	moll_135	Plant_4	24 C	69 % RH	ItG	male	29	9	0.3734	0.024831	Left	Hindwing	uns	int	104.108	NA	10.633	0.0283782	2	0.04792	d	3	2017-05-26	0.168458
2371	moll	636	India	2	moll_135	Plant_4	24 C	69 % RH	ItG	male	29	9	0.3157	0.0234798	Left	Forewing	uns	wet	94.6449	NA	1.0284	0.0711526	3	0.07433	w	4	2017-05-26	0.266745
2372	moll	636	India	2	moll_135	Plant_4	24 C	69 % RH	ItG	male	29	9	0.3157	0.0234798	Left	Hindwing	uns	wet	105.125	NA	7.4535	0.0711526	3	0.07433	w	4	2017-05-26	0.266745
2373	moll	637	India	2	moll_178	Plant_4	24 C	69 % RH	TG3	female	14	8	0.4227	0.0536063	Left	Forewing	uns	wet	121.065	NA	1.2575	0.0968785	4	0.09885	w	4	2017-06-09	0.311253
2374	moll	637	India	2	moll_178	Plant_4	24 C	69 % RH	TG3	female	14	8	0.4227	0.0536063	Left	Hindwing	uns	wet	133.907	NA	9.4282	0.0968785	4	0.09885	w	4	2017-06-09	0.311253
2375	moll	638	India	2	moll_156	Plant_4	24 C	69 % RH	ItG	male	21	NA	0.4191	0.0356358	Left	Forewing	uns	wet	NA	NA	NA	NA	3	0.07433	w	4	2017-06-04	NA
2376	moll	638	India	2	moll_156	Plant_4	24 C	69 % RH	ItG	male	21	NA	0.4191	0.0356358	Left	Hindwing	uns	wet	NA	NA	NA	NA	3	0.07433	w	4	2017-06-04	NA
2377	moll	639	India	2	moll_176	Plant_4	24 C	69 % RH	Setaria	male	16	NA	0.386	0.0455067	Left	Forewing	uns	wet	101.754	NA	0.9424	0.113544	4	0.09885	w	4	2017-06-09	0.336963
2378	moll	639	India	2	moll_176	Plant_4	24 C	69 % RH	Setaria	male	16	NA	0.386	0.0455067	Left	Hindwing	uns	wet	119.377	NA	5.9571	0.113544	4	0.09885	w	4	2017-06-09	0.336963
2381	moll	640	India	2	moll_181	Plant_4	24 C	69 % RH	Setaria	male	15	NA	0.414	0.0496869	Left	Forewing	uns	wet	107.404	NA	1.0229	0.0693299	3	0.07433	w	4	2017-06-10	0.263306
2382	moll	640	India	2	moll_181	Plant_4	24 C	69 % RH	Setaria	male	15	NA	0.414	0.0496869	Left	Hindwing	uns	wet	122.33	NA	6.8816	0.0693299	3	0.07433	w	4	2017-06-10	0.263306
2383	moll	641	India	2	moll_146	Plant_4	24 C	69 % RH	Setaria	female	24	9	0.3863	0.0303457	Left	Forewing	uns	wet	120.008	NA	1.8206	0.0780937	3	0.07433	w	4	2017-06-01	0.279453
2384	moll	641	India	2	moll_146	Plant_4	24 C	69 % RH	Setaria	female	24	9	0.3863	0.0303457	Left	Hindwing	uns	wet	136.613	NA	9.3698	0.0780937	3	0.07433	w	4	2017-06-01	0.279453
2385	moll	642	India	2	moll_178	Plant_4	24 C	69 % RH	TG3	male	16	9	0.4339	0.0473162	Left	Forewing	uns	wet	106.541	NA	1.1506	0.0735222	3	0.07433	w	4	2017-06-09	0.27115
2386	moll	642	India	2	moll_178	Plant_4	24 C	69 % RH	TG3	male	16	9	0.4339	0.0473162	Left	Hindwing	uns	wet	120.398	NA	7.6589	0.0735222	3	0.07433	w	4	2017-06-09	0.27115
2387	moll	643	India	2	moll_146	Plant_4	24 C	69 % RH	Setaria	male	24	8	0.3614	0.0296792	Left	Forewing	uns	wet	96.0111	NA	1.0593	0.0761797	3	0.07433	w	3	2017-06-01	0.276007
2388	moll	643	India	2	moll_146	Plant_4	24 C	69 % RH	Setaria	male	24	8	0.3614	0.0296792	Left	Hindwing	uns	wet	108.599	NA	8.2627	0.0761797	3	0.07433	w	3	2017-06-01	0.276007
2389	moll	644	India	2	moll_170	Plant_4	24 C	69 % RH	Setaria	female	18	8	0.4915	0.0438432	Left	Forewing	uns	wet	144.953	NA	3.5218	0.0639877	3	0.07433	w	4	2017-06-07	0.252958
2390	moll	644	India	2	moll_170	Plant_4	24 C	69 % RH	Setaria	female	18	8	0.4915	0.0438432	Left	Hindwing	uns	wet	164.021	NA	16.2973	0.0639877	3	0.07433	w	4	2017-06-07	0.252958
2391	moll	645	India	2	moll_170	Plant_4	24 C	69 % RH	Setaria	male	18	NA	0.3321	0.0384725	Left	Forewing	uns	wet	91.3279	NA	0.7596	0.0535984	3	0.07433	w	4	2017-06-07	0.231513
2392	moll	645	India	2	moll_170	Plant_4	24 C	69 % RH	Setaria	male	18	NA	0.3321	0.0384725	Left	Hindwing	uns	wet	107.694	NA	6.2768	0.0535984	3	0.07433	w	4	2017-06-07	0.231513
2393	moll	646	India	2	moll_171	Plant_4	24 C	69 % RH	Opl	male	18	9	0.4013	0.040978	Left	Forewing	uns	wet	109.885	NA	0.9198	0.0866683	3	0.07433	w	4	2017-06-07	0.294395
2394	moll	646	India	2	moll_171	Plant_4	24 C	69 % RH	Opl	male	18	9	0.4013	0.040978	Left	Hindwing	uns	wet	126.224	NA	8.0883	0.0866683	3	0.07433	w	4	2017-06-07	0.294395
2395	moll	647	India	2	moll_139	Plant_4	24 C	69 % RH	TallG	female	29	9	0.4946	0.0272701	Left	Forewing	uns	wet	139.956	NA	3.5487	0.0694585	3	0.07433	w	3	2017-05-28	0.26355
2396	moll	647	India	2	moll_139	Plant_4	24 C	69 % RH	TallG	female	29	9	0.4946	0.0272701	Left	Hindwing	uns	wet	156.207	NA	13.918	0.0694585	3	0.07433	w	3	2017-05-28	0.26355
2397	moll	648	India	2	moll_171	Plant_4	24 C	69 % RH	Opl	female	19	8	0.4249	0.0395678	Left	Forewing	uns	wet	121.923	NA	2.3129	0.0674327	3	0.07433	w	4	2017-06-07	0.259678
2398	moll	648	India	2	moll_171	Plant_4	24 C	69 % RH	Opl	female	19	8	0.4249	0.0395678	Left	Hindwing	uns	wet	139.938	NA	9.6032	0.0674327	3	0.07433	w	4	2017-06-07	0.259678
2399	moll	649	India	2	moll_176	Plant_4	24 C	69 % RH	Setaria	male	17	9	0.3488	0.0414073	Left	Forewing	uns	wet	95.9716	NA	0.9228	0.0624827	3	0.07433	w	4	2017-06-09	0.249965
2400	moll	649	India	2	moll_176	Plant_4	24 C	69 % RH	Setaria	male	17	9	0.3488	0.0414073	Left	Hindwing	uns	wet	114.83	NA	7.9369	0.0624827	3	0.07433	w	4	2017-06-09	0.249965
2403	moll	650	India	2	moll_171	Plant_4	24 C	69 % RH	Opl	male	19	8	0.3886	0.0384073	Left	Forewing	uns	wet	112.622	NA	0.9153	0.0480898	3	0.07433	w	4	2017-06-07	0.219294
2404	moll	650	India	2	moll_171	Plant_4	24 C	69 % RH	Opl	male	19	8	0.3886	0.0384073	Left	Hindwing	uns	wet	120.714	NA	8.2358	0.0480898	3	0.07433	w	4	2017-06-07	0.219294
2405	moll	651	India	2	moll_154	Plant_4	24 C	69 % RH	Opl	male	22	8	0.3824	0.0329926	Left	Forewing	uns	wet	91.9075	NA	1.0024	0.0784895	3	0.07433	w	4	2017-06-04	0.28016
2406	moll	651	India	2	moll_154	Plant_4	24 C	69 % RH	Opl	male	22	8	0.3824	0.0329926	Left	Hindwing	uns	wet	114.122	NA	7.3004	0.0784895	3	0.07433	w	4	2017-06-04	0.28016
2407	moll	652	India	2	moll_161	Plant_4	24 C	69 % RH	LightOpl	male	21	NA	0.3781	0.0344336	Left	Forewing	uns	wet	105.413	NA	1.2593	0.0538788	3	0.07433	w	4	2017-06-05	0.232118
2408	moll	652	India	2	moll_161	Plant_4	24 C	69 % RH	LightOpl	male	21	NA	0.3781	0.0344336	Left	Hindwing	uns	wet	117.543	NA	7.5814	0.0538788	3	0.07433	w	4	2017-06-05	0.232118
2409	moll	653	India	2	moll_189	Plant_4	24 C	69 % RH	TG3	male	15	8	0.4427	0.0508095	Left	Forewing	uns	wet	109.378	NA	1.4002	0.0874498	3	0.07433	w	4	2017-06-13	0.295719
2410	moll	653	India	2	moll_189	Plant_4	24 C	69 % RH	TG3	male	15	8	0.4427	0.0508095	Left	Hindwing	uns	wet	128.784	NA	9.5458	0.0874498	3	0.07433	w	4	2017-06-13	0.295719
2411	moll	654	India	2	moll_177	Plant_4	24 C	69 % RH	ItG	male	19	NA	0.3535	0.0372143	Left	Forewing	uns	wet	104.193	NA	1.4013	0.0775452	3	0.07433	w	4	2017-06-09	0.278469
2412	moll	654	India	2	moll_177	Plant_4	24 C	69 % RH	ItG	male	19	NA	0.3535	0.0372143	Left	Hindwing	uns	wet	117.818	NA	7.3663	0.0775452	3	0.07433	w	4	2017-06-09	0.278469
2413	moll	655	India	2	moll_184	Plant_4	24 C	69 % RH	TG3	male	17	8	0.3669	0.0421115	Left	Forewing	uns	wet	92.5871	NA	0.5902	0.0882898	3	0.07433	w	4	2017-06-11	0.297136
2414	moll	655	India	2	moll_184	Plant_4	24 C	69 % RH	TG3	male	17	8	0.3669	0.0421115	Left	Hindwing	uns	wet	110.385	NA	6.6693	0.0882898	3	0.07433	w	4	2017-06-11	0.297136
2415	moll	656	India	2	moll_171	Plant_4	24 C	69 % RH	Opl	male	20	8	0.3971	0.0367511	Left	Forewing	uns	wet	111.099	NA	1.2859	0.0792499	3	0.07433	w	4	2017-06-07	0.281514
2416	moll	656	India	2	moll_171	Plant_4	24 C	69 % RH	Opl	male	20	8	0.3971	0.0367511	Left	Hindwing	uns	wet	134.973	NA	9.1214	0.0792499	3	0.07433	w	4	2017-06-07	0.281514
2417	moll	657	India	2	moll_177	Plant_4	24 C	69 % RH	ItG	male	19	NA	0.3321	0.0364476	Left	Forewing	uns	wet	100.941	NA	1.21	0.0537404	3	0.07433	w	4	2017-06-09	0.23182
2418	moll	657	India	2	moll_177	Plant_4	24 C	69 % RH	ItG	male	19	NA	0.3321	0.0364476	Left	Hindwing	uns	wet	118.444	NA	7.4141	0.0537404	3	0.07433	w	4	2017-06-09	0.23182
2419	moll	658	India	2	moll_181	Plant_4	24 C	69 % RH	Setaria	male	18	7	0.379	0.0402044	Left	Forewing	uns	wet	106.074	NA	0.7132	0.0726649	3	0.07433	w	4	2017-06-10	0.269564
2420	moll	658	India	2	moll_181	Plant_4	24 C	69 % RH	Setaria	male	18	7	0.379	0.0402044	Left	Hindwing	uns	wet	114.143	NA	6.9613	0.0726649	3	0.07433	w	4	2017-06-10	0.269564
2421	moll	659	India	2	moll_173	Plant_4	24 C	69 % RH	CY	female	19	8	0.2906	0.0348614	Left	Forewing	uns	wet	86.8726	NA	1.5528	0.0630918	3	0.07433	w	4	2017-06-09	0.251181
2422	moll	659	India	2	moll_173	Plant_4	24 C	69 % RH	CY	female	19	8	0.2906	0.0348614	Left	Hindwing	uns	wet	85.0967	NA	5.1707	0.0630918	3	0.07433	w	4	2017-06-09	0.251181
2423	moll	660	India	2	moll_156	Plant_4	24 C	69 % RH	ItG	male	22	10	0.4505	0.0348451	Left	Forewing	uns	wet	115.859	NA	1.9392	0.0569046	3	0.07433	w	3	2017-06-04	0.238547
2424	moll	660	India	2	moll_156	Plant_4	24 C	69 % RH	ItG	male	22	10	0.4505	0.0348451	Left	Hindwing	uns	wet	138.216	NA	9.0029	0.0569046	3	0.07433	w	3	2017-06-04	0.238547
2425	moll	661	India	2	moll_171	Plant_4	24 C	69 % RH	Opl	male	20	9	0.3703	0.035905	Left	Forewing	uns	wet	102.873	NA	1.826	0.0612784	3	0.07433	w	3	2017-06-07	0.247545
2426	moll	661	India	2	moll_171	Plant_4	24 C	69 % RH	Opl	male	20	9	0.3703	0.035905	Left	Hindwing	uns	wet	111.804	NA	8.1243	0.0612784	3	0.07433	w	3	2017-06-07	0.247545
2427	moll	662	India	2	moll_144	Plant_4	24 C	69 % RH	ItG	male	28	8	0.393	0.0261601	Left	Forewing	uns	int	108.524	NA	1.5341	0.0517448	2	0.04792	w	3	2017-05-31	0.227475
2428	moll	662	India	2	moll_144	Plant_4	24 C	69 % RH	ItG	male	28	8	0.393	0.0261601	Left	Hindwing	uns	int	116.715	NA	8.9906	0.0517448	2	0.04792	w	3	2017-05-31	0.227475
2429	moll	663	India	2	moll_172	Plant_4	24 C	69 % RH	TallG	male	18	8	0.486	0.043679	Left	Forewing	uns	wet	123.311	NA	1.0482	0.0689561	3	0.07433	w	4	2017-06-09	0.262595
2430	moll	663	India	2	moll_172	Plant_4	24 C	69 % RH	TallG	male	18	8	0.486	0.043679	Left	Hindwing	uns	wet	134.641	NA	9.0877	0.0689561	3	0.07433	w	4	2017-06-09	0.262595
2431	moll	664	India	2	moll_178	Plant_4	24 C	69 % RH	TG3	female	18	8	0.4573	0.0428017	Left	Forewing	uns	wet	133.505	NA	2.1126	0.0947939	4	0.09885	w	4	2017-06-09	0.307886
2432	moll	664	India	2	moll_178	Plant_4	24 C	69 % RH	TG3	female	18	8	0.4573	0.0428017	Left	Hindwing	uns	wet	146.913	NA	9.1996	0.0947939	4	0.09885	w	4	2017-06-09	0.307886
2433	moll	665	India	2	moll_176	Plant_4	24 C	69 % RH	Setaria	female	18	8	0.4015	0.0409848	Left	Forewing	uns	wet	126.431	NA	2.5262	0.0919664	4	0.09885	w	4	2017-06-09	0.30326
2434	moll	665	India	2	moll_176	Plant_4	24 C	69 % RH	Setaria	female	18	8	0.4015	0.0409848	Left	Hindwing	uns	wet	145.587	NA	11.7143	0.0919664	4	0.09885	w	4	2017-06-09	0.30326
2435	moll	666	India	2	moll_170	Plant_4	24 C	69 % RH	Setaria	male	21	6	0.3701	0.0341891	Left	Forewing	uns	wet	106.675	NA	1.6571	0.0695162	3	0.07433	w	4	2017-06-07	0.263659
2436	moll	666	India	2	moll_170	Plant_4	24 C	69 % RH	Setaria	male	21	6	0.3701	0.0341891	Left	Hindwing	uns	wet	120.737	NA	7.648	0.0695162	3	0.07433	w	4	2017-06-07	0.263659
2437	moll	667	India	2	moll_178	Plant_4	24 C	69 % RH	TG3	female	18	7	0.4488	0.0425349	Left	Forewing	uns	wet	123.557	NA	1.876	0.100486	3	0.07433	w	4	2017-06-09	0.316995
2438	moll	667	India	2	moll_178	Plant_4	24 C	69 % RH	TG3	female	18	7	0.4488	0.0425349	Left	Hindwing	uns	wet	143.93	NA	9.9112	0.100486	3	0.07433	w	4	2017-06-09	0.316995
2439	moll	668	India	2	moll_156	Plant_4	24 C	69 % RH	ItG	female	23	8	0.4312	0.0328472	Left	Forewing	uns	wet	124.567	NA	2.478	0.0752305	3	0.07433	w	4	2017-06-04	0.274282
2440	moll	668	India	2	moll_156	Plant_4	24 C	69 % RH	ItG	female	23	8	0.4312	0.0328472	Left	Hindwing	uns	wet	140.887	NA	12.6744	0.0752305	3	0.07433	w	4	2017-06-04	0.274282
2441	moll	669	India	2	moll_178	Plant_4	24 C	69 % RH	TG3	female	18	NA	0.471	0.0432249	Left	Forewing	uns	wet	127.315	NA	2.5767	0.0934998	3	0.07433	w	4	2017-06-09	0.305777
2442	moll	669	India	2	moll_178	Plant_4	24 C	69 % RH	TG3	female	18	NA	0.471	0.0432249	Left	Hindwing	uns	wet	147.686	NA	10.2296	0.0934998	3	0.07433	w	4	2017-06-09	0.305777
2443	moll	670	India	2	moll_176	Plant_4	24 C	69 % RH	Setaria	male	18	8	0.3645	0.039685	Left	Forewing	uns	wet	103.66	NA	0.9663	0.0810589	3	0.07433	w	4	2017-06-09	0.284708
2444	moll	670	India	2	moll_176	Plant_4	24 C	69 % RH	Setaria	male	18	8	0.3645	0.039685	Left	Hindwing	uns	wet	116.155	NA	6.8851	0.0810589	3	0.07433	w	4	2017-06-09	0.284708
2445	moll	671	India	2	moll_177	Plant_4	24 C	69 % RH	ItG	male	20	7	0.311	0.0338758	Left	Forewing	uns	wet	88.5521	NA	0.8727	0.0607367	3	0.07433	w	4	2017-06-09	0.246448
2446	moll	671	India	2	moll_177	Plant_4	24 C	69 % RH	ItG	male	20	7	0.311	0.0338758	Left	Hindwing	uns	wet	101.726	NA	6.4121	0.0607367	3	0.07433	w	4	2017-06-09	0.246448
2447	moll	672	India	2	moll_184	Plant_4	24 C	69 % RH	TG3	male	18	8	0.4698	0.0431882	Left	Forewing	uns	wet	108.413	NA	0.8501	0.0766116	3	0.07433	w	4	2017-06-11	0.276788
2448	moll	672	India	2	moll_184	Plant_4	24 C	69 % RH	TG3	male	18	8	0.4698	0.0431882	Left	Hindwing	uns	wet	124.79	NA	7.9548	0.0766116	3	0.07433	w	4	2017-06-11	0.276788
2449	moll	673	India	2	moll_183	Plant_4	24 C	69 % RH	Setaria	female	18	7	0.3586	0.0394697	Left	Forewing	uns	wet	113.77	NA	1.489	0.0941151	4	0.09885	w	4	2017-06-11	0.306782
2450	moll	673	India	2	moll_183	Plant_4	24 C	69 % RH	Setaria	female	18	7	0.3586	0.0394697	Left	Hindwing	uns	wet	127.296	NA	8.6256	0.0941151	4	0.09885	w	4	2017-06-11	0.306782
2451	moll	674	India	2	moll_177	Plant_4	24 C	69 % RH	ItG	female	20	7	0.4127	0.0372262	Left	Forewing	uns	wet	131.604	NA	3.1441	0.0731579	3	0.07433	w	4	2017-06-09	0.270477
2452	moll	674	India	2	moll_177	Plant_4	24 C	69 % RH	ItG	female	20	7	0.4127	0.0372262	Left	Hindwing	uns	wet	143.473	NA	10.3164	0.0731579	3	0.07433	w	4	2017-06-09	0.270477
2453	moll	675	India	2	moll_176	Plant_4	24 C	69 % RH	Setaria	female	20	7	0.3787	0.0361744	Left	Forewing	uns	wet	124.992	NA	2.4197	0.0959216	4	0.09885	w	4	2017-06-09	0.309712
2454	moll	675	India	2	moll_176	Plant_4	24 C	69 % RH	Setaria	female	20	7	0.3787	0.0361744	Left	Hindwing	uns	wet	134.608	NA	10.1013	0.0959216	4	0.09885	w	4	2017-06-09	0.309712
2455	moll	676	India	2	moll_184	Plant_4	24 C	69 % RH	TG3	male	18	7	0.424	0.0417365	Left	Forewing	uns	wet	102.287	NA	0.4244	0.0614906	3	0.07433	w	4	2017-06-11	0.247973
2456	moll	676	India	2	moll_184	Plant_4	24 C	69 % RH	TG3	male	18	7	0.424	0.0417365	Left	Hindwing	uns	wet	119.317	NA	6.036	0.0614906	3	0.07433	w	4	2017-06-11	0.247973
2457	moll	677	India	2	moll_176	Plant_4	24 C	69 % RH	Setaria	female	20	7	0.3571	0.0354732	Left	Forewing	uns	wet	112.507	NA	NA	0.0919303	3	0.07433	w	4	2017-06-09	0.3032
2458	moll	677	India	2	moll_176	Plant_4	24 C	69 % RH	Setaria	female	20	7	0.3571	0.0354732	Left	Hindwing	uns	wet	125.961	NA	10.1914	0.0919303	3	0.07433	w	4	2017-06-09	0.3032
2459	moll	678	India	2	moll_154	Plant_4	24 C	69 % RH	Opl	female	25	7	0.3671	0.028641	Left	Forewing	uns	wet	121.985	NA	2.0111	0.109892	4	0.09885	w	4	2017-06-04	0.3315
2460	moll	678	India	2	moll_154	Plant_4	24 C	69 % RH	Opl	female	25	7	0.3671	0.028641	Left	Hindwing	uns	wet	130.969	NA	9.7005	0.109892	4	0.09885	w	4	2017-06-04	0.3315
2461	moll	679	India	2	moll_156	Plant_4	24 C	69 % RH	ItG	female	25	8	0.3922	0.0292794	Left	Forewing	uns	wet	116.981	NA	2.4837	0.0757269	3	0.07433	w	4	2017-06-04	0.275185
2462	moll	679	India	2	moll_156	Plant_4	24 C	69 % RH	ItG	female	25	8	0.3922	0.0292794	Left	Hindwing	uns	wet	130.17	NA	9.3931	0.0757269	3	0.07433	w	4	2017-06-04	0.275185
2463	moll	680	India	2	moll_170	Plant_4	24 C	69 % RH	Setaria	female	22	8	0.3891	0.0331842	Left	Forewing	uns	wet	111.215	NA	2.0713	0.0633787	2	0.04792	w	4	2017-06-07	0.251751
2464	moll	680	India	2	moll_170	Plant_4	24 C	69 % RH	Setaria	female	22	8	0.3891	0.0331842	Left	Hindwing	uns	wet	128.862	NA	8.9745	0.0633787	2	0.04792	w	4	2017-06-07	0.251751
2465	moll	681	India	2	moll_181	Plant_4	24 C	69 % RH	Setaria	male	19	7	0.386	0.0383215	Left	Forewing	uns	wet	112.613	NA	1.6275	0.0520465	2	0.04792	w	4	2017-06-10	0.228137
2466	moll	681	India	2	moll_181	Plant_4	24 C	69 % RH	Setaria	male	19	7	0.386	0.0383215	Left	Hindwing	uns	wet	126.837	NA	8.009	0.0520465	2	0.04792	w	4	2017-06-10	0.228137
2467	moll	682	India	2	moll_181	Plant_4	24 C	69 % RH	Setaria	female	19	8	0.4026	0.0388631	Left	Forewing	uns	wet	120.279	NA	2.9227	0.0633492	3	0.07433	w	4	2017-06-10	0.251693
2468	moll	682	India	2	moll_181	Plant_4	24 C	69 % RH	Setaria	female	19	8	0.4026	0.0388631	Left	Hindwing	uns	wet	133.728	NA	9.2865	0.0633492	3	0.07433	w	4	2017-06-10	0.251693
2469	moll	683	India	2	moll_185	Plant_4	24 C	69 % RH	MatBG	female	19	9	0.4423	0.0401007	Left	Forewing	uns	wet	123.584	NA	3.8417	0.0838963	3	0.07433	w	4	2017-06-11	0.289649
2470	moll	683	India	2	moll_185	Plant_4	24 C	69 % RH	MatBG	female	19	9	0.4423	0.0401007	Left	Hindwing	uns	wet	144.475	NA	11.0345	0.0838963	3	0.07433	w	4	2017-06-11	0.289649
2471	moll	684	India	2	moll_184	Plant_4	24 C	69 % RH	TG3	male	19	8	0.4562	0.0405165	Left	Forewing	uns	wet	112.582	NA	0.7098	0.0700773	3	0.07433	w	4	2017-06-11	0.264721
2472	moll	684	India	2	moll_184	Plant_4	24 C	69 % RH	TG3	male	19	8	0.4562	0.0405165	Left	Hindwing	uns	wet	127.479	NA	8.7385	0.0700773	3	0.07433	w	4	2017-06-11	0.264721
2473	moll	685	India	2	moll_189	Plant_4	24 C	69 % RH	TG3	male	18	8	0.4803	0.0435076	Left	Forewing	uns	wet	121.445	NA	1.5286	0.0783763	3	0.07433	w	4	2017-06-13	0.279958
2474	moll	685	India	2	moll_189	Plant_4	24 C	69 % RH	TG3	male	18	8	0.4803	0.0435076	Left	Hindwing	uns	wet	134.483	NA	7.3539	0.0783763	3	0.07433	w	4	2017-06-13	0.279958
2475	moll	686	India	2	moll_177	Plant_4	24 C	69 % RH	ItG	male	21	8	0.3351	0.0330754	Left	Forewing	uns	wet	90.6829	NA	1.2113	0.055338	3	0.07433	w	3	2017-06-09	0.23524
2476	moll	686	India	2	moll_177	Plant_4	24 C	69 % RH	ItG	male	21	8	0.3351	0.0330754	Left	Hindwing	uns	wet	112.689	NA	6.6742	0.055338	3	0.07433	w	3	2017-06-09	0.23524
2477	moll	687	India	2	moll_189	Plant_4	24 C	69 % RH	TG3	male	17	9	0.4259	0.0442575	Left	Forewing	uns	wet	117.002	NA	1.9975	0.0725592	3	0.07433	w	4	2017-06-13	0.269368
2478	moll	687	India	2	moll_189	Plant_4	24 C	69 % RH	TG3	male	17	9	0.4259	0.0442575	Left	Hindwing	uns	wet	127.554	NA	10.1767	0.0725592	3	0.07433	w	4	2017-06-13	0.269368
2479	moll	688	India	2	moll_189	Plant_4	24 C	69 % RH	TG3	male	18	8	0.4149	0.0414358	Left	Forewing	uns	wet	107.436	NA	1.2104	0.104539	3	0.07433	w	4	2017-06-13	0.323325
2480	moll	688	India	2	moll_189	Plant_4	24 C	69 % RH	TG3	male	18	8	0.4149	0.0414358	Left	Hindwing	uns	wet	119.082	NA	9.6009	0.104539	3	0.07433	w	4	2017-06-13	0.323325
2481	moll	689	India	2	moll_162	Plant_4	24 C	69 % RH	Opl	male	26	9	0.3038	0.0258557	Left	Forewing	uns	wet	NA	NA	NA	NA	3	0.07433	w	4	2017-06-05	NA
2482	moll	689	India	2	moll_162	Plant_4	24 C	69 % RH	Opl	male	26	9	0.3038	0.0258557	Left	Hindwing	uns	wet	NA	NA	NA	NA	3	0.07433	w	4	2017-06-05	NA
2483	moll	690	India	2	moll_189	Plant_4	24 C	69 % RH	TG3	male	18	9	0.3988	0.0408927	Left	Forewing	uns	wet	103.548	NA	1.2059	0.0896983	3	0.07433	w	4	2017-06-13	0.299497
2484	moll	690	India	2	moll_189	Plant_4	24 C	69 % RH	TG3	male	18	9	0.3988	0.0408927	Left	Hindwing	uns	wet	118.116	NA	7.7758	0.0896983	3	0.07433	w	4	2017-06-13	0.299497
2485	moll	691	India	2	moll_183	Plant_4	24 C	69 % RH	Setaria	female	20	NA	0.4297	0.0377304	Left	Forewing	uns	wet	122.692	NA	2.8912	0.0941941	3	0.07433	w	4	2017-06-11	0.306911
2486	moll	691	India	2	moll_183	Plant_4	24 C	69 % RH	Setaria	female	20	NA	0.4297	0.0377304	Left	Hindwing	uns	wet	137.479	NA	11.2119	0.0941941	3	0.07433	w	4	2017-06-11	0.306911
2487	moll	692	India	2	moll_179	Plant_4	24 C	69 % RH	MatBG	female	21	8	0.416	0.0355477	Left	Forewing	uns	wet	123.597	NA	3.1347	0.0805099	3	0.07433	w	4	2017-06-09	0.283743
2488	moll	692	India	2	moll_179	Plant_4	24 C	69 % RH	MatBG	female	21	8	0.416	0.0355477	Left	Hindwing	uns	wet	141.029	NA	13.2398	0.0805099	3	0.07433	w	4	2017-06-09	0.283743
2489	moll	693	India	2	moll_183	Plant_4	24 C	69 % RH	Setaria	male	19	8	0.3822	0.0381953	Left	Forewing	uns	wet	102.554	NA	1.3007	0.070256	3	0.07433	w	4	2017-06-11	0.265058
2490	moll	693	India	2	moll_183	Plant_4	24 C	69 % RH	Setaria	male	19	8	0.3822	0.0381953	Left	Hindwing	uns	wet	122.955	NA	6.3492	0.070256	3	0.07433	w	4	2017-06-11	0.265058
2491	moll	694	India	2	moll_153	Plant_4	24 C	69 % RH	ItG	male	27	9	0.4338	0.0280371	Left	Forewing	uns	wet	115.851	NA	3.2543	0.0533279	3	0.07433	w	3	2017-06-04	0.230928
2492	moll	694	India	2	moll_153	Plant_4	24 C	69 % RH	ItG	male	27	9	0.4338	0.0280371	Left	Hindwing	uns	wet	130.868	NA	11.0468	0.0533279	3	0.07433	w	3	2017-06-04	0.230928
2493	moll	695	India	2	moll_187	Plant_4	24 C	69 % RH	TG3	male	20	8	0.4335	0.0378413	Left	Forewing	uns	wet	108.249	NA	0.8778	0.0600905	3	0.07433	w	4	2017-06-13	0.245134
2494	moll	695	India	2	moll_187	Plant_4	24 C	69 % RH	TG3	male	20	8	0.4335	0.0378413	Left	Hindwing	uns	wet	126.857	NA	8.6439	0.0600905	3	0.07433	w	4	2017-06-13	0.245134
2495	moll	696	India	2	moll_177	Plant_4	24 C	69 % RH	ItG	male	24	8	0.3924	0.0305046	Left	Forewing	uns	wet	111.865	NA	1.7517	0.0644132	3	0.07433	w	4	2017-06-09	0.253798
2496	moll	696	India	2	moll_177	Plant_4	24 C	69 % RH	ItG	male	24	8	0.3924	0.0305046	Left	Hindwing	uns	wet	126.971	NA	7.3041	0.0644132	3	0.07433	w	4	2017-06-09	0.253798
2497	moll	697	India	2	moll_177	Plant_4	24 C	69 % RH	ItG	male	24	7	0.3614	0.0296792	Left	Forewing	uns	int	99.726	NA	1.6582	0.0522852	2	0.04792	w	3	2017-06-09	0.22866
2498	moll	697	India	2	moll_177	Plant_4	24 C	69 % RH	ItG	male	24	7	0.3614	0.0296792	Left	Hindwing	uns	int	117.439	NA	8.7726	0.0522852	2	0.04792	w	3	2017-06-09	0.22866
2499	moll	698	India	2	moll_154	Plant_4	24 C	69 % RH	Opl	male	30	NA	0.2862	0.0219669	Left	Forewing	uns	wet	88.8735	NA	1.5055	0.0645309	3	0.07433	w	4	2017-06-04	0.254029
2500	moll	698	India	2	moll_154	Plant_4	24 C	69 % RH	Opl	male	30	NA	0.2862	0.0219669	Left	Hindwing	uns	wet	103.586	NA	8.48	0.0645309	3	0.07433	w	4	2017-06-04	0.254029
2501	moll	699	India	2	moll_193	Plant_4	24 C	69 % RH	TG3	male	19	NA	0.3755	0.0379708	Left	Forewing	uns	wet	97.2878	NA	0.794	0.10159	3	0.07433	w	4	2017-06-15	0.318732
2502	moll	699	India	2	moll_193	Plant_4	24 C	69 % RH	TG3	male	19	NA	0.3755	0.0379708	Left	Hindwing	uns	wet	115.86	NA	6.1363	0.10159	3	0.07433	w	4	2017-06-15	0.318732
2505	moll	701	India	2	moll_182	Plant_4	24 C	69 % RH	MatBG	female	21	3	NA	NA	Left	Forewing	uns	wet	128.941	NA	2.4497	0.10449	4	0.09885	w	4	2017-06-11	0.323249
2506	moll	701	India	2	moll_182	Plant_4	24 C	69 % RH	MatBG	female	21	3	NA	NA	Left	Hindwing	uns	wet	140.524	NA	12.1768	0.10449	4	0.09885	w	4	2017-06-11	0.323249
2507	moll	703	India	2	moll_194	Plant_4	24 C	69 % RH	Setaria	female	17	8	0.4344	0.04455	Left	Forewing	uns	wet	107.566	NA	1.6219	0.0785064	3	0.07433	w	4	2017-06-15	0.28019
2508	moll	703	India	2	moll_194	Plant_4	24 C	69 % RH	Setaria	female	17	8	0.4344	0.04455	Left	Hindwing	uns	wet	128.433	NA	10.8142	0.0785064	3	0.07433	w	4	2017-06-15	0.28019
2509	moll	704	India	2	moll_169	Plant_4	24 C	69 % RH	ItG	male	26	8	0.4597	0.0296837	Left	Forewing	uns	wet	115.749	NA	1.8539	0.0483239	3	0.07433	w	4	2017-06-07	0.219827
2510	moll	704	India	2	moll_169	Plant_4	24 C	69 % RH	ItG	male	26	8	0.4597	0.0296837	Left	Hindwing	uns	wet	145.446	NA	8.4845	0.0483239	3	0.07433	w	4	2017-06-07	0.219827
2511	moll	705	India	2	moll_193	Plant_4	24 C	69 % RH	TG3	male	18	NA	0.3941	0.0407314	Left	Forewing	uns	wet	102.257	NA	1.3651	0.0880323	3	0.07433	w	4	2017-06-15	0.296702
2512	moll	705	India	2	moll_193	Plant_4	24 C	69 % RH	TG3	male	18	NA	0.3941	0.0407314	Left	Hindwing	uns	wet	117.127	NA	6.7385	0.0880323	3	0.07433	w	4	2017-06-15	0.296702
2513	moll	706	India	2	moll_194	Plant_4	24 C	69 % RH	Setaria	female	20	5	0.4344	0.0378675	Left	Forewing	uns	wet	130.338	NA	2.347	0.0912391	3	0.07433	w	4	2017-06-15	0.302058
2514	moll	706	India	2	moll_194	Plant_4	24 C	69 % RH	Setaria	female	20	5	0.4344	0.0378675	Left	Hindwing	uns	wet	141.931	NA	11.7688	0.0912391	3	0.07433	w	4	2017-06-15	0.302058
2515	moll	707	India	2	moll_193	Plant_4	24 C	69 % RH	TG3	female	20	9	0.4516	0.0383608	Left	Forewing	uns	wet	116.802	NA	2.0267	0.108356	4	0.09885	w	4	2017-06-15	0.329175
2516	moll	707	India	2	moll_193	Plant_4	24 C	69 % RH	TG3	female	20	9	0.4516	0.0383608	Left	Hindwing	uns	wet	136.543	NA	9.8151	0.108356	4	0.09885	w	4	2017-06-15	0.329175
2517	moll	708	India	2	moll_169	Plant_4	24 C	69 % RH	ItG	female	28	9	0.3559	0.0253096	Left	Forewing	uns	wet	116.813	NA	3.2374	0.0735385	3	0.07433	w	3	2017-06-07	0.27118
2518	moll	708	India	2	moll_169	Plant_4	24 C	69 % RH	ItG	female	28	9	0.3559	0.0253096	Left	Hindwing	uns	wet	125.441	NA	9.6744	0.0735385	3	0.07433	w	3	2017-06-07	0.27118
2519	moll	709	India	2	moll_185	Plant_4	24 C	69 % RH	MatBG	female	25	NA	0.4581	0.0308352	Left	Forewing	uns	wet	140.39	NA	3.5738	0.0766156	3	0.07433	w	4	2017-06-11	0.276795
2520	moll	709	India	2	moll_185	Plant_4	24 C	69 % RH	MatBG	female	25	NA	0.4581	0.0308352	Left	Hindwing	uns	wet	149.528	NA	12.308	0.0766156	3	0.07433	w	4	2017-06-11	0.276795
2521	moll	710	India	2	moll_195	Plant_4	24 C	69 % RH	Setaria	male	21	8	0.4101	0.0353789	Left	Forewing	uns	wet	107.595	NA	1.9708	0.0561966	3	0.07433	w	4	2017-06-15	0.237058
2522	moll	710	India	2	moll_195	Plant_4	24 C	69 % RH	Setaria	male	21	8	0.4101	0.0353789	Left	Hindwing	uns	wet	132.875	NA	7.5834	0.0561966	3	0.07433	w	4	2017-06-15	0.237058
2523	moll	712	India	2	moll_195	Plant_4	24 C	69 % RH	Setaria	female	21	8	0.381	0.0345215	Left	Forewing	uns	wet	120.543	NA	3.267	0.094894	3	0.07433	w	4	2017-06-15	0.308049
2524	moll	712	India	2	moll_195	Plant_4	24 C	69 % RH	Setaria	female	21	8	0.381	0.0345215	Left	Hindwing	uns	wet	133.61	NA	10.0835	0.094894	3	0.07433	w	4	2017-06-15	0.308049
2525	moll	713	India	2	moll_190	Plant_4	24 C	69 % RH	ThinG	female	26	8	0.3947	0.028213	Left	Forewing	uns	wet	124.634	NA	2.8395	0.0730441	3	0.07433	w	4	2017-06-14	0.270267
2526	moll	713	India	2	moll_190	Plant_4	24 C	69 % RH	ThinG	female	26	8	0.3947	0.028213	Left	Hindwing	uns	wet	135.123	NA	10.6598	0.0730441	3	0.07433	w	4	2017-06-14	0.270267
2527	moll	715	India	2	moll_188	Plant_4	24 C	69 % RH	Opl	male	28	8	0.2739	0.0231938	Left	Forewing	uns	wet	82.571	NA	1.9494	0.0944853	3	0.07433	w	4	2017-06-13	0.307385
2528	moll	715	India	2	moll_188	Plant_4	24 C	69 % RH	Opl	male	28	8	0.2739	0.0231938	Left	Hindwing	uns	wet	97.4818	NA	6.8942	0.0944853	3	0.07433	w	4	2017-06-13	0.307385
2529	moll	716	India	2	moll_198	Plant_4	24 C	69 % RH	Opl	female	17	7	0.2971	0.0392511	Left	Forewing	uns	wet	96.2454	NA	1.7872	0.0842767	3	0.07433	w	4	2017-06-23	0.290305
2530	moll	716	India	2	moll_198	Plant_4	24 C	69 % RH	Opl	female	17	7	0.2971	0.0392511	Left	Hindwing	uns	wet	100.478	NA	8.1833	0.0842767	3	0.07433	w	4	2017-06-23	0.290305
2531	moll	717	India	2	moll_167	Plant_4	24 C	69 % RH	TG	male	34	7	0.3656	0.0210308	Left	Forewing	uns	int	102.725	NA	3.2329	0.037979	2	0.04792	d	3	2017-06-06	0.194882
2532	moll	717	India	2	moll_167	Plant_4	24 C	69 % RH	TG	male	34	7	0.3656	0.0210308	Left	Hindwing	uns	int	118.626	NA	11.5839	0.037979	2	0.04792	d	3	2017-06-06	0.194882
2533	moll	718	India	2	moll_177	Plant_4	24 C	69 % RH	ItG	male	31	9	0.3118	0.0218741	Left	Forewing	uns	wet	87.5688	NA	1.4807	0.0725486	3	0.07433	w	4	2017-06-09	0.269348
2534	moll	718	India	2	moll_177	Plant_4	24 C	69 % RH	ItG	male	31	9	0.3118	0.0218741	Left	Hindwing	uns	wet	97.0977	NA	8.4332	0.0725486	3	0.07433	w	4	2017-06-09	0.269348
2535	moll	720	India	2	moll_195	Plant_4	24 C	69 % RH	Setaria	female	26	8	0.414	0.0286655	Left	Forewing	uns	wet	130.692	NA	3.1866	0.0736045	3	0.07433	d	4	2017-06-15	0.271301
2536	moll	720	India	2	moll_195	Plant_4	24 C	69 % RH	Setaria	female	26	8	0.414	0.0286655	Left	Hindwing	uns	wet	143.433	NA	11.7792	0.0736045	3	0.07433	d	4	2017-06-15	0.271301
2537	moll	721	India	2	moll_182	Plant_4	24 C	69 % RH	MatBG	male	26	7	0.3662	0.0275169	Left	Forewing	uns	wet	108.783	NA	2.2284	0.052021	3	0.07433	w	4	2017-06-11	0.228081
2538	moll	721	India	2	moll_182	Plant_4	24 C	69 % RH	MatBG	male	26	7	0.3662	0.0275169	Left	Hindwing	uns	wet	120.791	NA	9.4745	0.052021	3	0.07433	w	4	2017-06-11	0.228081
2539	moll	722	India	2	moll_196	Plant_4	24 C	69 % RH	ItG	female	26	8	0.3539	0.0272053	Left	Forewing	uns	wet	116.255	NA	3.1106	0.0893292	3	0.07433	w	4	2017-06-15	0.29888
2540	moll	722	India	2	moll_196	Plant_4	24 C	69 % RH	ItG	female	26	8	0.3539	0.0272053	Left	Hindwing	uns	wet	128.033	NA	11.4362	0.0893292	3	0.07433	w	4	2017-06-15	0.29888
2541	moll	724	India	2	moll_186	Plant_4	24 C	69 % RH	Opl	male	24	NA	0.2778	0.0271873	Left	Forewing	uns	wet	94.6463	NA	1.8262	0.0681328	3	0.07433	w	3	2017-06-13	0.261023
2542	moll	724	India	2	moll_186	Plant_4	24 C	69 % RH	Opl	male	24	NA	0.2778	0.0271873	Left	Hindwing	uns	wet	107.587	NA	8.2444	0.0681328	3	0.07433	w	3	2017-06-13	0.261023
2543	moll	725	India	2	moll_187	Plant_4	24 C	69 % RH	TG3	female	24	NA	0.4067	0.0308707	Left	Forewing	uns	wet	125.2	NA	2.6703	0.0886776	3	0.07433	w	4	2017-06-13	0.297788
2544	moll	725	India	2	moll_187	Plant_4	24 C	69 % RH	TG3	female	24	NA	0.4067	0.0308707	Left	Hindwing	uns	wet	133.876	NA	13.8935	0.0886776	3	0.07433	w	4	2017-06-13	0.297788
2545	moll	726	India	2	moll_196	Plant_4	24 C	69 % RH	ItG	female	23	8	0.3448	0.0304879	Left	Forewing	uns	wet	114.859	NA	2.767	0.0770536	3	0.07433	w	4	2017-06-15	0.277585
2546	moll	726	India	2	moll_196	Plant_4	24 C	69 % RH	ItG	female	23	8	0.3448	0.0304879	Left	Hindwing	uns	wet	122.629	NA	10.4502	0.0770536	3	0.07433	w	4	2017-06-15	0.277585
2547	moll	727	India	2	moll_194	Plant_4	24 C	69 % RH	Setaria	male	24	8	0.3649	0.0297747	Left	Forewing	uns	int	103.088	NA	2.1583	0.0547731	2	0.04792	w	3	2017-06-15	0.234037
2548	moll	727	India	2	moll_194	Plant_4	24 C	69 % RH	Setaria	male	24	8	0.3649	0.0297747	Left	Hindwing	uns	int	117.304	NA	10.5704	0.0547731	2	0.04792	w	3	2017-06-15	0.234037
2549	moll	728	India	2	moll_195	Plant_4	24 C	69 % RH	Setaria	female	22	NA	0.3899	0.0332069	Left	Forewing	uns	wet	129.755	NA	3.158	0.0852938	3	0.07433	w	4	2017-06-15	0.292051
2550	moll	728	India	2	moll_195	Plant_4	24 C	69 % RH	Setaria	female	22	NA	0.3899	0.0332069	Left	Hindwing	uns	wet	140.854	NA	12.1564	0.0852938	3	0.07433	w	4	2017-06-15	0.292051
2551	moll	729	India	2	moll_186	Plant_4	24 C	69 % RH	Opl	male	24	NA	0.2324	0.0256173	Left	Forewing	uns	dry	82.2695	NA	2.4884	0.0252925	1	0.02026	d	3	2017-06-13	0.159036
2552	moll	729	India	2	moll_186	Plant_4	24 C	69 % RH	Opl	male	24	NA	0.2324	0.0256173	Left	Hindwing	uns	dry	93.5691	NA	7.7098	0.0252925	1	0.02026	d	3	2017-06-13	0.159036
2553	moll	730	India	2	moll_167	Plant_4	24 C	69 % RH	TG	female	37	7	0.4896	0.0213016	Left	Forewing	uns	int	127.9	NA	3.1383	0.0374701	2	0.04792	d	3	2017-06-06	0.193572
2554	moll	730	India	2	moll_167	Plant_4	24 C	69 % RH	TG	female	37	7	0.4896	0.0213016	Left	Hindwing	uns	int	148.62	NA	16.1822	0.0374701	2	0.04792	d	3	2017-06-06	0.193572
2555	moll	732	India	2	moll_?	Plant_4	24 C	69 % RH	Setaria	male	NA	8	0.356	NA	Left	Forewing	uns	wet	90.5263	NA	0.6955	0.0621195	3	0.07433	w	4	NA	0.249238
2556	moll	732	India	2	moll_?	Plant_4	24 C	69 % RH	Setaria	male	NA	8	0.356	NA	Left	Hindwing	uns	wet	111.553	NA	5.6225	0.0621195	3	0.07433	w	4	NA	0.249238
2557	moll	733	India	2	moll_198	Plant_4	24 C	69 % RH	Opl	male	19	7	0.2907	0.0348654	Left	Forewing	uns	wet	87.9652	NA	1.0909	0.0822505	3	0.07433	w	4	2017-06-23	0.286793
2558	moll	733	India	2	moll_198	Plant_4	24 C	69 % RH	Opl	male	19	7	0.2907	0.0348654	Left	Hindwing	uns	wet	98.1356	NA	6.8589	0.0822505	3	0.07433	w	4	2017-06-23	0.286793
2559	moll	735	India	2	moll_203	Plant_4	24 C	69 % RH	TG3	female	19	8	0.4755	0.0410799	Left	Forewing	uns	wet	119.871	NA	2.4208	0.0851983	3	0.07433	w	4	2017-06-24	0.291887
2560	moll	735	India	2	moll_203	Plant_4	24 C	69 % RH	TG3	female	19	8	0.4755	0.0410799	Left	Hindwing	uns	wet	140.444	NA	10.7814	0.0851983	3	0.07433	w	4	2017-06-24	0.291887
2561	moll	736	India	2	moll_202	Plant_4	24 C	69 % RH	TallG	female	19	8	0.5389	0.0428301	Left	Forewing	uns	wet	128.802	NA	2.184	0.0780664	3	0.07433	w	3	2017-06-24	0.279404
2562	moll	736	India	2	moll_202	Plant_4	24 C	69 % RH	TallG	female	19	8	0.5389	0.0428301	Left	Hindwing	uns	wet	151.993	NA	10.8988	0.0780664	3	0.07433	w	3	2017-06-24	0.279404
2563	moll	737	India	2	moll_202	Plant_4	24 C	69 % RH	TallG	male	18	6	0.4402	0.0422614	Left	Forewing	uns	wet	101.257	NA	0.2967	0.0921738	3	0.07433	w	4	2017-06-24	0.303601
2564	moll	737	India	2	moll_202	Plant_4	24 C	69 % RH	TallG	male	18	6	0.4402	0.0422614	Left	Hindwing	uns	wet	120.29	NA	5.6696	0.0921738	3	0.07433	w	4	2017-06-24	0.303601
2565	moll	738	India	2	moll_175	Plant_4	24 C	69 % RH	Bamb	female	33	7	0.3902	0.0221436	Left	Forewing	uns	int	120.365	NA	3.3145	0.0491936	2	0.04792	d	3	2017-06-09	0.221796
2566	moll	738	India	2	moll_175	Plant_4	24 C	69 % RH	Bamb	female	33	7	0.3902	0.0221436	Left	Hindwing	uns	int	133.655	NA	15.5497	0.0491936	2	0.04792	d	3	2017-06-09	0.221796
2567	moll	739	India	2	moll_198	Plant_4	24 C	69 % RH	Opl	female	19	7	0.3611	0.0374791	Left	Forewing	uns	wet	111.943	NA	2.0603	0.0951981	4	0.09885	w	4	2017-06-23	0.308542
2568	moll	739	India	2	moll_198	Plant_4	24 C	69 % RH	Opl	female	19	7	0.3611	0.0374791	Left	Hindwing	uns	wet	122.513	NA	10.3749	0.0951981	4	0.09885	w	4	2017-06-23	0.308542
2569	moll	740	India	2	moll_175	Plant_4	24 C	69 % RH	Bamb	male	34	7	0.2871	0.0194028	Left	Forewing	uns	wet	95.6946	NA	2.1956	0.0652003	3	0.07433	w	4	2017-06-09	0.255344
2570	moll	740	India	2	moll_175	Plant_4	24 C	69 % RH	Bamb	male	34	7	0.2871	0.0194028	Left	Hindwing	uns	wet	108.078	NA	9.844	0.0652003	3	0.07433	w	4	2017-06-09	0.255344
2571	moll	741	India	2	moll_206	Plant_4	24 C	69 % RH	ItG	female	19	7	0.4154	0.0392707	Left	Forewing	uns	wet	112.305	NA	2.4764	0.0849826	3	0.07433	w	4	2017-06-25	0.291518
2572	moll	741	India	2	moll_206	Plant_4	24 C	69 % RH	ItG	female	19	7	0.4154	0.0392707	Left	Hindwing	uns	wet	132.879	NA	9.1542	0.0849826	3	0.07433	w	4	2017-06-25	0.291518
2573	moll	742	India	2	moll_206	Plant_4	24 C	69 % RH	ItG	male	19	6	0.4129	0.0391918	Left	Forewing	uns	wet	101.966	NA	1.62	0.0639102	3	0.07433	w	3	2017-06-25	0.252805
2574	moll	742	India	2	moll_206	Plant_4	24 C	69 % RH	ItG	male	19	6	0.4129	0.0391918	Left	Hindwing	uns	wet	125.92	NA	8.7273	0.0639102	3	0.07433	w	3	2017-06-25	0.252805
2575	moll	743	India	2	moll_201	Plant_4	24 C	69 % RH	Opl	male	22	6	0.3327	0.0314964	Left	Forewing	uns	int	94.3619	NA	2.0521	0.0457648	2	0.04792	w	3	2017-06-23	0.213927
2576	moll	743	India	2	moll_201	Plant_4	24 C	69 % RH	Opl	male	22	6	0.3327	0.0314964	Left	Hindwing	uns	int	105.634	NA	12.574	0.0457648	2	0.04792	w	3	2017-06-23	0.213927
2577	moll	744	India	2	moll_197	Plant_4	24 C	69 % RH	Opl	female	22	8	0.421	0.0340673	Left	Forewing	uns	wet	129.825	NA	2.4946	0.0756771	3	0.07433	w	4	2017-06-23	0.275095
2578	moll	744	India	2	moll_197	Plant_4	24 C	69 % RH	Opl	female	22	8	0.421	0.0340673	Left	Hindwing	uns	wet	146.512	NA	12.5344	0.0756771	3	0.07433	w	4	2017-06-23	0.275095
2579	moll	745	India	2	moll_197	Plant_4	24 C	69 % RH	Opl	female	21	5	0.3391	0.0332065	Left	Forewing	uns	wet	114.656	NA	3.4238	0.0796052	3	0.07433	d	3	2017-06-23	0.282144
2580	moll	745	India	2	moll_197	Plant_4	24 C	69 % RH	Opl	female	21	5	0.3391	0.0332065	Left	Hindwing	uns	wet	122.031	NA	9.3059	0.0796052	3	0.07433	d	3	2017-06-23	0.282144
2581	moll	746	India	2	moll_201	Plant_4	24 C	69 % RH	Opl	female	21	7	0.3933	0.034889	Left	Forewing	uns	int	112.647	NA	3.1941	0.0460861	2	0.04792	d	3	2017-06-23	0.214677
2582	moll	746	India	2	moll_201	Plant_4	24 C	69 % RH	Opl	female	21	7	0.3933	0.034889	Left	Hindwing	uns	int	131.619	NA	11.1745	0.0460861	2	0.04792	d	3	2017-06-23	0.214677
2583	moll	747	India	2	moll_202	Plant_4	24 C	69 % RH	TallG	female	20	6	0.4966	0.0395949	Left	Forewing	uns	wet	134.382	NA	2.1672	0.106595	3	0.07433	w	4	2017-06-24	0.326489
2584	moll	747	India	2	moll_202	Plant_4	24 C	69 % RH	TallG	female	20	6	0.4966	0.0395949	Left	Hindwing	uns	wet	149.103	NA	10.8983	0.106595	3	0.07433	w	4	2017-06-24	0.326489
2585	moll	748	India	2	moll_209	Plant_4	24 C	69 % RH	MatBG	male	19	6	0.3998	0.0387728	Left	Forewing	uns	wet	99.9654	NA	0.4028	0.0798379	3	0.07433	w	4	2017-06-25	0.282556
2586	moll	748	India	2	moll_209	Plant_4	24 C	69 % RH	MatBG	male	19	6	0.3998	0.0387728	Left	Hindwing	uns	wet	117.141	NA	8.958	0.0798379	3	0.07433	w	4	2017-06-25	0.282556
2587	moll	749	India	2	moll_?	Plant_4	24 C	69 % RH	Setaria	female	NA	7	0.4341	NA	Left	Forewing	uns	wet	119.31	NA	2.8805	0.0832479	3	0.07433	w	4	NA	0.288527
2588	moll	749	India	2	moll_?	Plant_4	24 C	69 % RH	Setaria	female	NA	7	0.4341	NA	Left	Hindwing	uns	wet	136.719	NA	9.6134	0.0832479	3	0.07433	w	4	NA	0.288527
2589	moll	750	India	2	moll_190	Plant_4	24 C	69 % RH	ThinG	female	30	NA	0.4267	0.0250949	Left	Forewing	uns	wet	136.529	NA	2.6541	0.076094	3	0.07433	w	3	2017-06-14	0.275851
2590	moll	750	India	2	moll_190	Plant_4	24 C	69 % RH	ThinG	female	30	NA	0.4267	0.0250949	Left	Hindwing	uns	wet	136.229	NA	12.712	0.076094	3	0.07433	w	3	2017-06-14	0.275851
2591	moll	751	India	2	moll_175	Plant_4	24 C	69 % RH	Bamb	female	35	7	0.2706	0.0184803	Left	Forewing	uns	int	88.8162	NA	2.6009	0.073685	3	0.07433	d	3	2017-06-09	0.27145
2592	moll	751	India	2	moll_175	Plant_4	24 C	69 % RH	Bamb	female	35	7	0.2706	0.0184803	Left	Hindwing	uns	int	97.0225	NA	10.4398	0.073685	3	0.07433	d	3	2017-06-09	0.27145
2593	moll	752	India	2	moll_175	Plant_4	24 C	69 % RH	Bamb	female	36	6	0.3131	0.0188622	Left	Forewing	uns	wet	103.317	NA	2.777	0.0720773	3	0.07433	w	3	2017-06-09	0.268472
2594	moll	752	India	2	moll_175	Plant_4	24 C	69 % RH	Bamb	female	36	6	0.3131	0.0188622	Left	Hindwing	uns	wet	114.535	NA	10.0104	0.0720773	3	0.07433	w	3	2017-06-09	0.268472
2595	moll	753	India	2	moll_214	Plant_4	24 C	69 % RH	TG3	female	20	8	0.4407	0.0380497	Left	Forewing	uns	wet	129.194	NA	2.8731	0.074949	3	0.07433	w	4	2017-06-28	0.273768
2596	moll	753	India	2	moll_214	Plant_4	24 C	69 % RH	TG3	female	20	8	0.4407	0.0380497	Left	Hindwing	uns	wet	150.45	NA	10.9731	0.074949	3	0.07433	w	4	2017-06-28	0.273768
2597	moll	754	India	2	moll_216	Plant_4	24 C	69 % RH	Setaria	male	20	7	0.3724	0.0359727	Left	Forewing	uns	wet	102.15	NA	0.9651	0.0648479	3	0.07433	w	3	2017-06-28	0.254653
2598	moll	754	India	2	moll_216	Plant_4	24 C	69 % RH	Setaria	male	20	7	0.3724	0.0359727	Left	Hindwing	uns	wet	123.617	NA	8.8023	0.0648479	3	0.07433	w	3	2017-06-28	0.254653
2599	moll	755	India	2	moll_208	Plant_4	24 C	69 % RH	CY	female	23	8	0.3697	0.0312048	Left	Forewing	uns	wet	117.646	NA	2.0166	0.100843	4	0.09885	w	4	2017-06-25	0.317558
2600	moll	755	India	2	moll_208	Plant_4	24 C	69 % RH	CY	female	23	8	0.3697	0.0312048	Left	Hindwing	uns	wet	127.885	NA	11.6874	0.100843	4	0.09885	w	4	2017-06-25	0.317558
2601	moll	756	India	2	moll_217	Plant_4	24 C	69 % RH	TG3	female	20	8	0.4403	0.0380382	Left	Forewing	uns	wet	129.297	NA	2.5956	0.0778112	3	0.07433	w	4	2017-06-28	0.278947
2602	moll	756	India	2	moll_217	Plant_4	24 C	69 % RH	TG3	female	20	8	0.4403	0.0380382	Left	Hindwing	uns	wet	149.042	NA	12.9606	0.0778112	3	0.07433	w	4	2017-06-28	0.278947
2603	moll	757	India	2	moll_214	Plant_4	24 C	69 % RH	TG3	male	20	7	0.389	0.0364995	Left	Forewing	uns	wet	111.951	NA	1.5585	0.0682385	3	0.07433	w	4	2017-06-28	0.261225
2604	moll	757	India	2	moll_214	Plant_4	24 C	69 % RH	TG3	male	20	7	0.389	0.0364995	Left	Hindwing	uns	wet	130.368	NA	8.3568	0.0682385	3	0.07433	w	4	2017-06-28	0.261225
2605	moll	758	India	2	moll_212	Plant_4	24 C	69 % RH	BG	female	21	8	0.4209	0.0356868	Left	Forewing	uns	wet	130.542	NA	2.0525	0.0729285	3	0.07433	w	3	2017-06-28	0.270053
2606	moll	758	India	2	moll_212	Plant_4	24 C	69 % RH	BG	female	21	8	0.4209	0.0356868	Left	Hindwing	uns	wet	137.867	NA	10.6216	0.0729285	3	0.07433	w	3	2017-06-28	0.270053
2607	moll	759	India	2	moll_218	Plant_4	24 C	69 % RH	TG3	female	20	7	0.453	0.0384004	Left	Forewing	uns	wet	117.668	NA	1.375	0.0938119	3	0.07433	w	4	2017-06-28	0.306287
2608	moll	759	India	2	moll_218	Plant_4	24 C	69 % RH	TG3	female	20	7	0.453	0.0384004	Left	Hindwing	uns	wet	135.198	NA	11.2407	0.0938119	3	0.07433	w	4	2017-06-28	0.306287
2609	moll	761	India	2	moll_208	Plant_4	24 C	69 % RH	CY	female	21	8	0.4202	0.035667	Left	Forewing	uns	wet	134.321	NA	1.6216	0.0841121	3	0.07433	w	3	2017-06-25	0.290021
2610	moll	761	India	2	moll_208	Plant_4	24 C	69 % RH	CY	female	21	8	0.4202	0.035667	Left	Hindwing	uns	wet	137.734	NA	12.1231	0.0841121	3	0.07433	w	3	2017-06-25	0.290021
2611	moll	763	India	2	moll_208	Plant_4	24 C	69 % RH	CY	female	21	9	0.3986	0.035045	Left	Forewing	uns	wet	NA	NA	2.7112	NA	3	0.07433	w	4	2017-06-25	NA
2612	moll	763	India	2	moll_208	Plant_4	24 C	69 % RH	CY	female	21	9	0.3986	0.035045	Left	Hindwing	uns	wet	NA	NA	11.7728	NA	3	0.07433	w	4	2017-06-25	NA
2613	moll	764	India	2	moll_192	Plant_4	24 C	69 % RH	BigOpl	female	35	8	0.3366	0.0198748	Left	Forewing	uns	wet	114.213	NA	3.5988	0.0438242	3	0.07433	w	4	2017-06-14	0.209342
2614	moll	764	India	2	moll_192	Plant_4	24 C	69 % RH	BigOpl	female	35	8	0.3366	0.0198748	Left	Hindwing	uns	wet	121.77	NA	14.0895	0.0438242	3	0.07433	w	4	2017-06-14	0.209342
2615	moll	766	India	2	moll_175	Plant_4	24 C	69 % RH	Bamb	female	38	8	0.3614	0.0187447	Left	Forewing	uns	int	110	NA	3.0439	0.051313	2	0.04792	d	3	2017-06-09	0.226524
2616	moll	766	India	2	moll_175	Plant_4	24 C	69 % RH	Bamb	female	38	8	0.3614	0.0187447	Left	Hindwing	uns	int	119.939	NA	13.2003	0.051313	2	0.04792	d	3	2017-06-09	0.226524
2617	moll	767	India	2	moll_201	Plant_4	24 C	69 % RH	Opl	female	24	8	0.3538	0.0294696	Left	Forewing	uns	wet	104.606	NA	2.1022	0.0702657	3	0.07433	w	3	2017-06-23	0.265077
2618	moll	767	India	2	moll_201	Plant_4	24 C	69 % RH	Opl	female	24	8	0.3538	0.0294696	Left	Hindwing	uns	wet	120.676	NA	10.0449	0.0702657	3	0.07433	w	3	2017-06-23	0.265077
2619	moll	768	India	2	moll_205	Plant_4	24 C	69 % RH	ThinG	female	21	7	0.3693	0.0341644	Left	Forewing	uns	wet	113.793	NA	1.7757	0.081494	3	0.07433	w	4	2017-06-25	0.285471
2620	moll	768	India	2	moll_205	Plant_4	24 C	69 % RH	ThinG	female	21	7	0.3693	0.0341644	Left	Hindwing	uns	wet	126.606	NA	11.2748	0.081494	3	0.07433	w	4	2017-06-25	0.285471
2621	moll	769	India	2	moll_199	Plant_4	24 C	69 % RH	ItG	female	23	7	0.4027	0.032107	Left	Forewing	uns	wet	123.478	NA	1.7984	0.075709	3	0.07433	w	4	2017-06-23	0.275153
2622	moll	769	India	2	moll_199	Plant_4	24 C	69 % RH	ItG	female	23	7	0.4027	0.032107	Left	Hindwing	uns	wet	144.269	NA	11.3531	0.075709	3	0.07433	w	4	2017-06-23	0.275153
2623	moll	770	India	2	moll_201	Plant_4	24 C	69 % RH	Opl	female	23	8	0.3367	0.0302473	Left	Forewing	uns	wet	105.085	NA	1.9261	0.0865644	3	0.07433	w	4	2017-06-23	0.294218
2624	moll	770	India	2	moll_201	Plant_4	24 C	69 % RH	Opl	female	23	8	0.3367	0.0302473	Left	Hindwing	uns	wet	117.663	NA	10.5234	0.0865644	3	0.07433	w	4	2017-06-23	0.294218
2625	moll	772	India	2	moll_216	Plant_4	24 C	69 % RH	Setaria	female	21	7	0.3676	0.0341119	Left	Forewing	uns	wet	118.25	NA	2.4153	0.0739961	3	0.07433	w	4	2017-06-28	0.272022
2626	moll	772	India	2	moll_216	Plant_4	24 C	69 % RH	Setaria	female	21	7	0.3676	0.0341119	Left	Hindwing	uns	wet	128.899	NA	9.4817	0.0739961	3	0.07433	w	4	2017-06-28	0.272022
2627	moll	773	India	2	moll_216	Plant_4	24 C	69 % RH	Setaria	female	22	7	0.4079	0.0337102	Left	Forewing	uns	wet	124.725	NA	3.0012	0.0722865	3	0.07433	w	4	2017-06-28	0.268862
2628	moll	773	India	2	moll_216	Plant_4	24 C	69 % RH	Setaria	female	22	7	0.4079	0.0337102	Left	Hindwing	uns	wet	142.7	NA	10.1051	0.0722865	3	0.07433	w	4	2017-06-28	0.268862
2629	moll	774	India	2	moll_214	Plant_4	24 C	69 % RH	TG3	female	21	8	0.4291	0.035917	Left	Forewing	uns	wet	139.311	NA	2.57	0.0653561	3	0.07433	w	4	2017-06-28	0.255648
2630	moll	774	India	2	moll_214	Plant_4	24 C	69 % RH	TG3	female	21	8	0.4291	0.035917	Left	Hindwing	uns	wet	153.011	NA	12.286	0.0653561	3	0.07433	w	4	2017-06-28	0.255648
2631	moll	775	India	2	moll_209	Plant_4	24 C	69 % RH	MatBG	female	24	8	0.4705	0.0324072	Left	Forewing	uns	int	116.571	NA	2.4165	0.0432688	2	0.04792	w	3	2017-06-25	0.208012
2632	moll	775	India	2	moll_209	Plant_4	24 C	69 % RH	MatBG	female	24	8	0.4705	0.0324072	Left	Hindwing	uns	int	156.963	NA	9.5298	0.0432688	2	0.04792	w	3	2017-06-25	0.208012
2633	moll	776	India	2	moll_216	Plant_4	24 C	69 % RH	Setaria	female	21	8	0.4231	0.0357488	Left	Forewing	uns	wet	131.781	NA	2.9435	0.0556475	3	0.07433	w	4	2017-06-28	0.235897
2634	moll	776	India	2	moll_216	Plant_4	24 C	69 % RH	Setaria	female	21	8	0.4231	0.0357488	Left	Hindwing	uns	wet	147.839	NA	13.237	0.0556475	3	0.07433	w	4	2017-06-28	0.235897
2635	moll	777	India	2	moll_214	Plant_4	24 C	69 % RH	TG3	female	21	8	0.4646	0.0368814	Left	Forewing	uns	wet	143.528	NA	3.3606	0.0791603	3	0.07433	w	4	2017-06-28	0.281354
2636	moll	777	India	2	moll_214	Plant_4	24 C	69 % RH	TG3	female	21	8	0.4646	0.0368814	Left	Hindwing	uns	wet	157.431	NA	11.6858	0.0791603	3	0.07433	w	4	2017-06-28	0.281354
2637	moll	778	India	2	moll_217	Plant_4	24 C	69 % RH	TG3	female	22	NA	0.4645	0.0352024	Left	Forewing	uns	wet	125.004	NA	2.2586	0.0888949	3	0.07433	w	4	2017-06-28	0.298152
2638	moll	778	India	2	moll_217	Plant_4	24 C	69 % RH	TG3	female	22	NA	0.4645	0.0352024	Left	Hindwing	uns	wet	140.09	NA	10.379	0.0888949	3	0.07433	w	4	2017-06-28	0.298152
2639	moll	779	India	2	moll_175	Plant_4	24 C	69 % RH	Bamb	female	40	8	0.3576	0.0177449	Left	Forewing	uns	wet	111.057	NA	2.4114	0.0596061	3	0.07433	w	3	2017-06-09	0.244144
2640	moll	779	India	2	moll_175	Plant_4	24 C	69 % RH	Bamb	female	40	8	0.3576	0.0177449	Left	Hindwing	uns	wet	128.089	NA	12.4047	0.0596061	3	0.07433	w	3	2017-06-09	0.244144
2641	moll	780	India	2	moll_214	Plant_4	24 C	69 % RH	TG3	female	21	7	0.4254	0.0358135	Left	Forewing	uns	wet	123.423	NA	1.9253	0.0845314	3	0.07433	w	4	2017-06-28	0.290743
2642	moll	780	India	2	moll_214	Plant_4	24 C	69 % RH	TG3	female	21	7	0.4254	0.0358135	Left	Hindwing	uns	wet	139.357	NA	11.5083	0.0845314	3	0.07433	w	4	2017-06-28	0.290743
2643	moll	781	India	2	moll_204	Plant_4	24 C	69 % RH	Ochl	male	26	NA	0.3175	0.0262386	Left	Forewing	uns	dry	99.812	NA	2.8907	0.0338077	1	0.02026	d	2	2017-06-24	0.183869
2644	moll	781	India	2	moll_204	Plant_4	24 C	69 % RH	Ochl	male	26	NA	0.3175	0.0262386	Left	Hindwing	uns	dry	115.338	NA	11.218	0.0338077	1	0.02026	d	2	2017-06-24	0.183869
2645	moll	782	India	2	moll_214	Plant_4	24 C	69 % RH	TG3	female	21	8	0.43	0.0359421	Left	Forewing	uns	wet	135.176	NA	3.1403	0.0586354	3	0.07433	w	4	2017-06-28	0.242147
2646	moll	782	India	2	moll_214	Plant_4	24 C	69 % RH	TG3	female	21	8	0.43	0.0359421	Left	Hindwing	uns	wet	146.372	NA	11.8275	0.0586354	3	0.07433	w	4	2017-06-28	0.242147
2647	moll	783	India	2	moll_223	Plant_4	24 C	69 % RH	TallG	male	18	8	0.4293	0.0419097	Left	Forewing	uns	wet	115.659	NA	0.5411	0.119	4	0.09885	w	4	2017-07-01	0.344964
2648	moll	783	India	2	moll_223	Plant_4	24 C	69 % RH	TallG	male	18	8	0.4293	0.0419097	Left	Hindwing	uns	wet	122.254	NA	7.2709	0.119	4	0.09885	w	4	2017-07-01	0.344964
2649	moll	785	India	2	moll_224	Plant_4	24 C	69 % RH	ThinG	male	19	NA	0.31678	0.0358783	Left	Forewing	uns	wet	92.0112	NA	1.3354	0.0732693	3	0.07433	w	3	2017-07-01	0.270683
2650	moll	785	India	2	moll_224	Plant_4	24 C	69 % RH	ThinG	male	19	NA	0.31678	0.0358783	Left	Hindwing	uns	wet	107.214	NA	6.1576	0.0732693	3	0.07433	w	3	2017-07-01	0.270683
2651	moll	786	India	2	moll_225	Plant_4	24 C	69 % RH	Setaria	male	19	NA	0.3785	0.0380716	Left	Forewing	uns	int	98.7579	NA	1.8941	0.0421507	2	0.04792	w	3	2017-07-01	0.205306
2652	moll	786	India	2	moll_225	Plant_4	24 C	69 % RH	Setaria	male	19	NA	0.3785	0.0380716	Left	Hindwing	uns	int	114.544	NA	9.1972	0.0421507	2	0.04792	w	3	2017-07-01	0.205306
2653	moll	787	India	2	moll_200	Plant_4	24 C	69 % RH	MatBG	male	27	NA	0.3786	0.0267935	Left	Forewing	uns	wet	102.336	NA	1.6074	0.0600151	3	0.07433	w	3	2017-06-23	0.24498
2654	moll	787	India	2	moll_200	Plant_4	24 C	69 % RH	MatBG	male	27	NA	0.3786	0.0267935	Left	Hindwing	uns	wet	117.92	NA	7.6295	0.0600151	3	0.07433	w	3	2017-06-23	0.24498
2655	moll	788	India	2	moll_223	Plant_4	24 C	69 % RH	TallG	male	20	NA	0.4046	0.036981	Left	Forewing	uns	wet	106.014	NA	1.0267	0.0841852	3	0.07433	w	4	2017-07-01	0.290147
2656	moll	788	India	2	moll_223	Plant_4	24 C	69 % RH	TallG	male	20	NA	0.4046	0.036981	Left	Hindwing	uns	wet	124.477	NA	7.086	0.0841852	3	0.07433	w	4	2017-07-01	0.290147
2657	moll	789	India	2	moll_225	Plant_4	24 C	69 % RH	Setaria	male	20	NA	0.3352	0.0347327	Left	Forewing	uns	wet	91.556	NA	1.3048	0.0583481	3	0.07433	w	4	2017-07-01	0.241554
2658	moll	789	India	2	moll_225	Plant_4	24 C	69 % RH	Setaria	male	20	NA	0.3352	0.0347327	Left	Hindwing	uns	wet	101.157	NA	6.8239	0.0583481	3	0.07433	w	4	2017-07-01	0.241554
2661	moll	790	India	2	moll_214	Plant_4	24 C	69 % RH	TG3	female	24	8	0.4638	0.0322527	Left	Forewing	uns	wet	139.523	NA	3.0863	0.0661616	3	0.07433	w	3	2017-06-28	0.257219
2662	moll	790	India	2	moll_214	Plant_4	24 C	69 % RH	TG3	female	24	8	0.4638	0.0322527	Left	Hindwing	uns	wet	154.393	NA	10.9226	0.0661616	3	0.07433	w	3	2017-06-28	0.257219
2663	moll	791	India	2	moll_219	Plant_4	24 C	69 % RH	Opl	female	24	NA	0.3787	0.0301454	Left	Forewing	uns	wet	122.077	NA	2.7211	0.092396	4	0.09885	w	4	2017-06-28	0.303967
2664	moll	791	India	2	moll_219	Plant_4	24 C	69 % RH	Opl	female	24	NA	0.3787	0.0301454	Left	Hindwing	uns	wet	134.389	NA	10.8851	0.092396	4	0.09885	w	4	2017-06-28	0.303967
2665	moll	792	India	2	moll_217	Plant_4	24 C	69 % RH	TG3	male	23	NA	0.4433	0.0331516	Left	Forewing	uns	wet	112.273	NA	NA	0.0748447	4	0.09885	w	3	2017-06-28	0.273578
2666	moll	792	India	2	moll_217	Plant_4	24 C	69 % RH	TG3	male	23	NA	0.4433	0.0331516	Left	Hindwing	uns	wet	128.713	NA	7.1877	0.0748447	4	0.09885	w	3	2017-06-28	0.273578
2667	moll	793	India	2	moll_200	Plant_4	24 C	69 % RH	MatBG	male	28	NA	0.4234	0.026818	Left	Forewing	uns	wet	104.222	NA	1.2108	0.0599292	3	0.07433	w	3	2017-06-23	0.244804
2668	moll	793	India	2	moll_200	Plant_4	24 C	69 % RH	MatBG	male	28	NA	0.4234	0.026818	Left	Hindwing	uns	wet	118.526	NA	5.6681	0.0599292	3	0.07433	w	3	2017-06-23	0.244804
2669	moll	794	India	2	moll_205	Plant_4	24 C	69 % RH	ThinG	male	26	NA	0.3626	0.0274264	Left	Forewing	uns	wet	95.6828	NA	1.1435	0.0661998	3	0.07433	w	4	2017-06-25	0.257293
2670	moll	794	India	2	moll_205	Plant_4	24 C	69 % RH	ThinG	male	26	NA	0.3626	0.0274264	Left	Hindwing	uns	wet	108.091	NA	7.5701	0.0661998	3	0.07433	w	4	2017-06-25	0.257293
2671	moll	795	India	2	moll_212	Plant_4	24 C	69 % RH	BG	female	23	NA	0.3837	0.0315939	Left	Forewing	uns	wet	116.972	NA	1.9636	0.0931996	4	0.09885	w	4	2017-06-28	0.305286
2672	moll	795	India	2	moll_212	Plant_4	24 C	69 % RH	BG	female	23	NA	0.3837	0.0315939	Left	Hindwing	uns	wet	123.166	NA	11.1287	0.0931996	4	0.09885	w	4	2017-06-28	0.305286
2673	moll	796	India	2	moll_225	Plant_4	24 C	69 % RH	Setaria	female	20	NA	0.3652	0.0357394	Left	Forewing	uns	wet	109.686	NA	1.9145	0.0678731	3	0.07433	w	4	2017-07-01	0.260525
2674	moll	796	India	2	moll_225	Plant_4	24 C	69 % RH	Setaria	female	20	NA	0.3652	0.0357394	Left	Hindwing	uns	wet	123.37	NA	9.5969	0.0678731	3	0.07433	w	4	2017-07-01	0.260525
2675	moll	797	India	2	moll_230	Plant_4	24 C	69 % RH	TallG	female	18	NA	0.384	0.0403805	Left	Forewing	uns	wet	110.793	NA	1.1307	0.0512147	3	0.07433	w	4	2017-07-03	0.226307
2676	moll	797	India	2	moll_230	Plant_4	24 C	69 % RH	TallG	female	18	NA	0.384	0.0403805	Left	Hindwing	uns	wet	123.701	NA	7.4175	0.0512147	3	0.07433	w	4	2017-07-03	0.226307
2677	moll	798	India	2	moll_216	Plant_4	24 C	69 % RH	Setaria	female	23	NA	0.4109	0.0323234	Left	Forewing	uns	wet	126.859	NA	2.3645	0.0768045	3	0.07433	w	4	2017-06-28	0.277136
2678	moll	798	India	2	moll_216	Plant_4	24 C	69 % RH	Setaria	female	23	NA	0.4109	0.0323234	Left	Hindwing	uns	wet	138.35	NA	11.5499	0.0768045	3	0.07433	w	4	2017-06-28	0.277136
2679	moll	799	India	2	moll_230	Plant_4	24 C	69 % RH	TallG	male	18	NA	0.4852	0.043655	Left	Forewing	uns	wet	116.36	NA	1.2168	0.0678434	3	0.07433	w	4	2017-07-03	0.260468
2680	moll	799	India	2	moll_230	Plant_4	24 C	69 % RH	TallG	male	18	NA	0.4852	0.043655	Left	Hindwing	uns	wet	132.937	NA	10.514	0.0678434	3	0.07433	w	4	2017-07-03	0.260468
2685	moll	800	India	2	moll_217	Plant_4	24 C	69 % RH	TG3	female	23	NA	0.46	0.0335628	Left	Forewing	uns	wet	123.467	NA	1.9903	0.0912813	4	0.09885	w	4	2017-06-28	0.302128
2686	moll	800	India	2	moll_217	Plant_4	24 C	69 % RH	TG3	female	23	NA	0.46	0.0335628	Left	Hindwing	uns	wet	141.198	NA	10.7116	0.0912813	4	0.09885	w	4	2017-06-28	0.302128
2687	moll	801	India	2	moll_217	Plant_4	24 C	69 % RH	TG3	female	23	NA	0.4717	0.033845	Left	Forewing	uns	wet	120.346	NA	2.0684	0.0868757	3	0.07433	w	4	2017-06-28	0.294747
2688	moll	801	India	2	moll_217	Plant_4	24 C	69 % RH	TG3	female	23	NA	0.4717	0.033845	Left	Hindwing	uns	wet	141.936	NA	10.6259	0.0868757	3	0.07433	w	4	2017-06-28	0.294747
2689	moll	802	India	2	moll_213	Plant_4	24 C	69 % RH	ItG	female	24	8	0.3186	0.028458	Left	Forewing	uns	wet	106.4	NA	1.6921	0.0629289	3	0.07433	w	4	2017-06-28	0.250856
2690	moll	802	India	2	moll_213	Plant_4	24 C	69 % RH	ItG	female	24	8	0.3186	0.028458	Left	Hindwing	uns	wet	114.345	NA	9.1347	0.0629289	3	0.07433	w	4	2017-06-28	0.250856
2691	moll	803	India	2	moll_213	Plant_4	24 C	69 % RH	ItG	female	24	9	0.3791	0.030156	Left	Forewing	uns	wet	118.101	NA	2.5846	0.045332	3	0.07433	w	4	2017-06-28	0.212913
2692	moll	803	India	2	moll_213	Plant_4	24 C	69 % RH	ItG	female	24	9	0.3791	0.030156	Left	Hindwing	uns	wet	134.801	NA	11.8335	0.045332	3	0.07433	w	4	2017-06-28	0.212913
2693	moll	804	India	2	moll_215	Plant_4	24 C	69 % RH	ItG	female	25	9	0.5045	0.031843	Left	Forewing	uns	wet	136.286	NA	3.1572	0.0744076	3	0.07433	d	4	2017-06-28	0.272778
2694	moll	804	India	2	moll_215	Plant_4	24 C	69 % RH	ItG	female	25	9	0.5045	0.031843	Left	Hindwing	uns	wet	157.579	NA	13.7241	0.0744076	3	0.07433	d	4	2017-06-28	0.272778
2695	moll	805	India	2	moll_216	Plant_4	24 C	69 % RH	Setaria	male	24	NA	0.4323	0.0315053	Left	Forewing	uns	wet	119.103	NA	1.8954	0.0659068	3	0.07433	w	4	2017-06-28	0.256723
2696	moll	805	India	2	moll_216	Plant_4	24 C	69 % RH	Setaria	male	24	NA	0.4323	0.0315053	Left	Hindwing	uns	wet	136.031	NA	9.5679	0.0659068	3	0.07433	w	4	2017-06-28	0.256723
2697	moll	807	India	2	moll_215	Plant_4	24 C	69 % RH	ItG	male	25	NA	0.4471	0.0305864	Left	Forewing	uns	wet	121.199	NA	2.4511	0.0630406	3	0.07433	w	3	2017-06-28	0.251079
2698	moll	807	India	2	moll_215	Plant_4	24 C	69 % RH	ItG	male	25	NA	0.4471	0.0305864	Left	Hindwing	uns	wet	137.094	NA	9.9184	0.0630406	3	0.07433	w	3	2017-06-28	0.251079
2699	moll	808	India	2	moll_217	Plant_4	24 C	69 % RH	TG3	male	24	8	0.4451	0.0318132	Left	Forewing	uns	int	108.218	NA	1.179	0.0425384	2	0.04792	w	3	2017-06-28	0.206248
2700	moll	808	India	2	moll_217	Plant_4	24 C	69 % RH	TG3	male	24	8	0.4451	0.0318132	Left	Hindwing	uns	int	130.912	NA	9.4114	0.0425384	2	0.04792	w	3	2017-06-28	0.206248
2701	moll	809	India	2	moll_231	Plant_4	24 C	69 % RH	TallG	male	16	8	0.4226	0.0469018	Left	Forewing	uns	wet	102.76	NA	0.888	0.1252	4	0.09885	w	4	2017-07-06	0.353837
2702	moll	809	India	2	moll_231	Plant_4	24 C	69 % RH	TallG	male	16	8	0.4226	0.0469018	Left	Hindwing	uns	wet	115.262	NA	6.7153	0.1252	4	0.09885	w	4	2017-07-06	0.353837
2705	moll	810	India	2	moll_207	Plant_4	24 C	69 % RH	Opl	male	28	8	0.3443	0.0250315	Left	Forewing	uns	int	105.916	NA	2.1603	0.041751	2	0.04792	w	3	2017-06-25	0.204331
2706	moll	810	India	2	moll_207	Plant_4	24 C	69 % RH	Opl	male	28	8	0.3443	0.0250315	Left	Hindwing	uns	int	122.984	NA	8.9457	0.041751	2	0.04792	w	3	2017-06-25	0.204331
2707	moll	811	India	2	moll_230	Plant_4	24 C	69 % RH	TallG	female	20	NA	0.4323	0.0378064	Left	Forewing	uns	wet	126.66	NA	2.5791	0.083002	3	0.07433	w	4	2017-07-03	0.288101
2708	moll	811	India	2	moll_230	Plant_4	24 C	69 % RH	TallG	female	20	NA	0.4323	0.0378064	Left	Hindwing	uns	wet	142.905	NA	14.3989	0.083002	3	0.07433	w	4	2017-07-03	0.288101
2709	moll	812	India	2	moll_233	Plant_4	24 C	69 % RH	TG3	male	18	8	0.4944	0.0439292	Left	Forewing	uns	wet	81.8991	NA	NA	0.0831584	3	0.07433	w	4	2017-07-06	0.288372
2710	moll	812	India	2	moll_233	Plant_4	24 C	69 % RH	TG3	male	18	8	0.4944	0.0439292	Left	Hindwing	uns	wet	129.54	NA	7.7092	0.0831584	3	0.07433	w	4	2017-07-06	0.288372
2711	moll	813	India	2	moll_215	Plant_4	24 C	69 % RH	ItG	female	26	8	0.5014	0.0305554	Left	Forewing	uns	int	139.053	NA	3.4445	0.052996	2	0.04792	d	3	2017-06-28	0.230209
2712	moll	813	India	2	moll_215	Plant_4	24 C	69 % RH	ItG	female	26	8	0.5014	0.0305554	Left	Hindwing	uns	int	161.612	NA	12.735	0.052996	2	0.04792	d	3	2017-06-28	0.230209
2713	moll	814	India	2	moll_229	Plant_4	24 C	69 % RH	BG	male	22	8	0.3064	0.0306436	Left	Forewing	uns	wet	93.1888	NA	1.2165	0.069944	3	0.07433	w	4	2017-07-03	0.264469
2714	moll	814	India	2	moll_229	Plant_4	24 C	69 % RH	BG	male	22	8	0.3064	0.0306436	Left	Hindwing	uns	wet	99.6354	NA	8.2603	0.069944	3	0.07433	w	4	2017-07-03	0.264469
2715	moll	815	India	2	moll_222	Plant_4	24 C	69 % RH	Opl	male	26	NA	0.2145	0.0230234	Left	Forewing	uns	int	NA	NA	NA	NA	2	0.04792	3	3	2017-06-29	NA
2716	moll	815	India	2	moll_222	Plant_4	24 C	69 % RH	Opl	male	26	NA	0.2145	0.0230234	Left	Hindwing	uns	int	NA	NA	NA	NA	2	0.04792	3	3	2017-06-29	NA
2717	moll	816	India	2	moll_233	Plant_4	24 C	69 % RH	TG3	female	19	6	0.423	0.0395087	Left	Forewing	uns	wet	121.599	NA	1.5338	0.0847292	3	0.07433	w	4	2017-07-06	0.291083
2718	moll	816	India	2	moll_233	Plant_4	24 C	69 % RH	TG3	female	19	6	0.423	0.0395087	Left	Hindwing	uns	wet	131.434	NA	8.9791	0.0847292	3	0.07433	w	4	2017-07-06	0.291083
2719	moll	817	India	2	moll_233	Plant_4	24 C	69 % RH	TG3	male	19	8	0.3808	0.0381486	Left	Forewing	uns	wet	98.8763	NA	0.7962	0.114603	4	0.09885	w	4	2017-07-06	0.338531
2720	moll	817	India	2	moll_233	Plant_4	24 C	69 % RH	TG3	male	19	8	0.3808	0.0381486	Left	Hindwing	uns	wet	110.368	NA	5.7057	0.114603	4	0.09885	w	4	2017-07-06	0.338531
2721	moll	818	India	2	moll_231	Plant_4	24 C	69 % RH	TallG	male	18	7	0.4182	0.0415453	Left	Forewing	uns	wet	109.548	NA	0.9033	0.107472	4	0.09885	w	4	2017-07-06	0.32783
2722	moll	818	India	2	moll_231	Plant_4	24 C	69 % RH	TallG	male	18	7	0.4182	0.0415453	Left	Hindwing	uns	wet	125.656	NA	7.0806	0.107472	4	0.09885	w	4	2017-07-06	0.32783
2723	moll	819	India	2	moll_207	Plant_4	24 C	69 % RH	Opl	female	30	8	0.4041	0.0246438	Left	Forewing	uns	wet	113.241	NA	2.7489	0.0640847	3	0.07433	w	4	2017-06-25	0.25315
2724	moll	819	India	2	moll_207	Plant_4	24 C	69 % RH	Opl	female	30	8	0.4041	0.0246438	Left	Hindwing	uns	wet	133.807	NA	11.6339	0.0640847	3	0.07433	w	4	2017-06-25	0.25315
2727	moll	820	India	2	moll_231	Plant_4	24 C	69 % RH	TallG	male	18	7	0.4511	0.0426074	Left	Forewing	uns	wet	105.881	NA	0.5056	0.076335	3	0.07433	w	4	2017-07-06	0.276288
2728	moll	820	India	2	moll_231	Plant_4	24 C	69 % RH	TallG	male	18	7	0.4511	0.0426074	Left	Hindwing	uns	wet	132.357	NA	7.1379	0.076335	3	0.07433	w	4	2017-07-06	0.276288
2729	moll	821	India	2	moll_212	Plant_4	24 C	69 % RH	BG	female	26	8	0.4285	0.0289964	Left	Forewing	uns	wet	120.297	NA	2.6644	0.0630321	3	0.07433	w	4	2017-06-28	0.251062
2730	moll	821	India	2	moll_212	Plant_4	24 C	69 % RH	BG	female	26	8	0.4285	0.0289964	Left	Hindwing	uns	wet	142.171	NA	10.8561	0.0630321	3	0.07433	w	4	2017-06-28	0.251062
2731	moll	822	India	2	moll_222	Plant_4	24 C	69 % RH	Opl	female	26	8	0.4312	0.0290571	Left	Forewing	uns	wet	128.963	NA	2.2709	0.0931101	4	0.09885	w	4	2017-06-29	0.305139
2732	moll	822	India	2	moll_222	Plant_4	24 C	69 % RH	Opl	female	26	8	0.4312	0.0290571	Left	Hindwing	uns	wet	144.088	NA	11.1767	0.0931101	4	0.09885	w	4	2017-06-29	0.305139
2733	moll	823	India	2	moll_215	Plant_4	24 C	69 % RH	ItG	male	28	8	0.419	0.0267247	Left	Forewing	uns	wet	118.425	NA	2.3321	0.0501249	3	0.07433	w	3	2017-06-28	0.223886
2734	moll	823	India	2	moll_215	Plant_4	24 C	69 % RH	ItG	male	28	8	0.419	0.0267247	Left	Hindwing	uns	wet	141.369	NA	9.8903	0.0501249	3	0.07433	w	3	2017-06-28	0.223886
2735	moll	824	India	2	moll_204	Plant_4	24 C	69 % RH	Ochl	female	32	5	0.3327	0.0216538	Left	Forewing	uns	wet	105.945	NA	2.4224	0.0589659	3	0.07433	w	3	2017-06-24	0.242829
2736	moll	824	India	2	moll_204	Plant_4	24 C	69 % RH	Ochl	female	32	5	0.3327	0.0216538	Left	Hindwing	uns	wet	117.176	NA	11.5803	0.0589659	3	0.07433	w	3	2017-06-24	0.242829
2737	moll	825	India	2	moll_229	Plant_4	24 C	69 % RH	BG	male	23	8	0.3488	0.0306054	Left	Forewing	uns	int	104.79	NA	1.8721	0.0444514	2	0.04792	w	3	2017-07-03	0.210835
2738	moll	825	India	2	moll_229	Plant_4	24 C	69 % RH	BG	male	23	8	0.3488	0.0306054	Left	Hindwing	uns	int	114.95	NA	7.6755	0.0444514	2	0.04792	w	3	2017-07-03	0.210835
2739	moll	826	India	2	moll_228	Plant_4	24 C	69 % RH	TallG	male	23	7	0.2688	0.0280596	Left	Forewing	uns	wet	85.8423	NA	1.8151	0.0668122	3	0.07433	w	3	2017-07-03	0.25848
2740	moll	826	India	2	moll_228	Plant_4	24 C	69 % RH	TallG	male	23	7	0.2688	0.0280596	Left	Hindwing	uns	wet	98.75	NA	6.0328	0.0668122	3	0.07433	w	3	2017-07-03	0.25848
2741	moll	827	India	2	moll_233	Plant_4	24 C	69 % RH	TG3	male	20	7	0.3663	0.0357752	Left	Forewing	uns	wet	98.571	NA	1.1594	0.0773622	3	0.07433	w	4	2017-07-06	0.278141
2742	moll	827	India	2	moll_233	Plant_4	24 C	69 % RH	TG3	male	20	7	0.3663	0.0357752	Left	Hindwing	uns	wet	108.808	NA	6.1854	0.0773622	3	0.07433	w	4	2017-07-06	0.278141
2743	moll	828	India	2	moll_222	Plant_4	24 C	69 % RH	Opl	male	28	8	0.4342	0.0270441	Left	Forewing	uns	wet	115.442	NA	1.4757	0.0784552	3	0.07433	w	4	2017-06-29	0.280099
2744	moll	828	India	2	moll_222	Plant_4	24 C	69 % RH	Opl	male	28	8	0.4342	0.0270441	Left	Hindwing	uns	wet	128.208	NA	8.1074	0.0784552	3	0.07433	w	4	2017-06-29	0.280099
2745	moll	829	India	2	moll_211	Plant_4	24 C	69 % RH	ItG	female	30	8	0.4314	0.0251868	Left	Forewing	uns	wet	125.815	NA	2.8047	0.0988441	4	0.09885	w	4	2017-06-26	0.314395
2746	moll	829	India	2	moll_211	Plant_4	24 C	69 % RH	ItG	female	30	8	0.4314	0.0251868	Left	Hindwing	uns	wet	139.505	NA	11.3431	0.0988441	4	0.09885	w	4	2017-06-26	0.314395
2749	moll	830	India	2	moll_204	Plant_4	24 C	69 % RH	Ochl	female	35	7	0.4115	0.0212515	Left	Forewing	uns	wet	100.249	NA	3.5435	0.086018	3	0.07433	d	4	2017-06-24	0.293288
2750	moll	830	India	2	moll_204	Plant_4	24 C	69 % RH	Ochl	female	35	7	0.4115	0.0212515	Left	Hindwing	uns	wet	130.167	NA	13.0393	0.086018	3	0.07433	d	4	2017-06-24	0.293288
2751	moll	831	India	2	moll_232	Plant_4	24 C	69 % RH	TallG	female	23	7	0.4249	0.0326864	Left	Forewing	uns	wet	120.589	NA	1.4422	0.0968825	3	0.07433	w	4	2017-07-06	0.31126
2752	moll	831	India	2	moll_232	Plant_4	24 C	69 % RH	TallG	female	23	7	0.4249	0.0326864	Left	Hindwing	uns	wet	129.341	NA	8.5073	0.0968825	3	0.07433	w	4	2017-07-06	0.31126
2753	moll	832	India	2	moll_232	Plant_4	24 C	69 % RH	TallG	male	23	8	0.4177	0.0325008	Left	Forewing	uns	wet	115.59	NA	1.3781	0.0853642	3	0.07433	w	4	2017-07-06	0.292172
2754	moll	832	India	2	moll_232	Plant_4	24 C	69 % RH	TallG	male	23	8	0.4177	0.0325008	Left	Hindwing	uns	wet	133.099	NA	7.9088	0.0853642	3	0.07433	w	4	2017-07-06	0.292172
2755	moll	834	India	2	moll_240	Plant_4	24 C	69 % RH	TG2	female	24	10	0.2952	0.0277435	Left	Forewing	uns	wet	104.35	NA	2.9359	0.0735671	3	0.07433	w	4	2017-07-19	0.271233
2756	moll	834	India	2	moll_240	Plant_4	24 C	69 % RH	TG2	female	24	10	0.2952	0.0277435	Left	Hindwing	uns	wet	115.004	NA	11.205	0.0735671	3	0.07433	w	4	2017-07-19	0.271233
2757	moll	837	India	2	moll_244	Plant_4	24 C	69 % RH	ThinG	male	22	8	0.379	0.0328945	Left	Forewing	uns	wet	101.292	NA	0.6362	0.0757523	3	0.07433	w	4	2017-07-21	0.275231
2758	moll	837	India	2	moll_244	Plant_4	24 C	69 % RH	ThinG	male	22	8	0.379	0.0328945	Left	Hindwing	uns	wet	115.828	NA	7.2775	0.0757523	3	0.07433	w	4	2017-07-21	0.275231
2759	moll	838	India	2	moll_243	Plant_4	24 C	69 % RH	ThinG	male	22	8	0.4067	0.0336772	Left	Forewing	uns	wet	115.096	NA	0.6318	0.081416	3	0.07433	w	4	2017-07-21	0.285335
2760	moll	838	India	2	moll_243	Plant_4	24 C	69 % RH	ThinG	male	22	8	0.4067	0.0336772	Left	Hindwing	uns	wet	125.65	NA	7.3756	0.081416	3	0.07433	w	4	2017-07-21	0.285335
2761	moll	839	India	2	moll_238	Plant_4	24 C	69 % RH	Setaria	male	24	9	0.378	0.0301268	Left	Forewing	uns	wet	NA	NA	NA	0.0693917	3	0.07433	w	4	2017-07-19	0.263423
2762	moll	839	India	2	moll_238	Plant_4	24 C	69 % RH	Setaria	male	24	9	0.378	0.0301268	Left	Hindwing	uns	wet	103.262	NA	7.3333	0.0693917	3	0.07433	w	4	2017-07-19	0.263423
2763	moll	840	India	2	moll_239	Plant_4	24 C	69 % RH	ItG	male	21	8	0.4237	0.0357657	Left	Forewing	uns	wet	110.654	NA	0.5539	0.0878545	4	0.09885	w	4	2017-07-19	0.296403
2764	moll	840	India	2	moll_239	Plant_4	24 C	69 % RH	ItG	male	21	8	0.4237	0.0357657	Left	Hindwing	uns	wet	131.928	NA	6.9091	0.0878545	4	0.09885	w	4	2017-07-19	0.296403
2765	moll	841	India	2	moll_243	Plant_4	24 C	69 % RH	ThinG	male	22	7	0.3821	0.032984	Left	Forewing	uns	wet	107.929	NA	0.4048	0.0927686	4	0.09885	w	4	2017-07-21	0.304579
2766	moll	841	India	2	moll_243	Plant_4	24 C	69 % RH	ThinG	male	22	7	0.3821	0.032984	Left	Hindwing	uns	wet	121.595	NA	7.5703	0.0927686	4	0.09885	w	4	2017-07-21	0.304579
2767	moll	844	India	2	moll_244	Plant_4	24 C	69 % RH	ThinG	male	22	8	0.365	0.0324844	Left	Forewing	uns	wet	103.931	NA	0.8075	0.0736323	3	0.07433	w	4	2017-07-21	0.271353
2768	moll	844	India	2	moll_244	Plant_4	24 C	69 % RH	ThinG	male	22	8	0.365	0.0324844	Left	Hindwing	uns	wet	123.548	NA	8.5149	0.0736323	3	0.07433	w	4	2017-07-21	0.271353
2769	moll	845	India	2	moll_242	Plant_4	24 C	69 % RH	HG	female	27	7	0.3312	0.0256251	Left	Forewing	uns	wet	105.474	NA	3.2952	0.0950458	3	0.07433	d	4	2017-07-19	0.308295
2770	moll	845	India	2	moll_242	Plant_4	24 C	69 % RH	HG	female	27	7	0.3312	0.0256251	Left	Hindwing	uns	wet	120.913	NA	9.6523	0.0950458	3	0.07433	d	4	2017-07-19	0.308295
2771	moll	846	India	2	moll_241	Plant_4	24 C	69 % RH	HG	female	26	8	0.3663	0.0275194	Left	Forewing	uns	wet	122.895	NA	4.5004	0.0672636	3	0.07433	d	3	2017-07-19	0.259352
2772	moll	846	India	2	moll_241	Plant_4	24 C	69 % RH	HG	female	26	8	0.3663	0.0275194	Left	Hindwing	uns	wet	137.476	NA	15.6678	0.0672636	3	0.07433	d	3	2017-07-19	0.259352
2773	moll	847	India	2	moll_235	Plant_4	24 C	69 % RH	TG2	male	27	9	0.3618	0.0263912	Left	Forewing	uns	wet	106.321	NA	0.7558	0.0763812	3	0.07433	w	4	2017-07-19	0.276371
2774	moll	847	India	2	moll_235	Plant_4	24 C	69 % RH	TG2	male	27	9	0.3618	0.0263912	Left	Hindwing	uns	wet	127.002	NA	7.4788	0.0763812	3	0.07433	w	4	2017-07-19	0.276371
2775	moll	848	India	2	moll_242	Plant_4	24 C	69 % RH	HG	male	26	9	0.2442	0.0240404	Left	Forewing	uns	wet	78.5717	NA	1.4852	0.0672448	3	0.07433	w	3	2017-07-19	0.259316
2776	moll	848	India	2	moll_242	Plant_4	24 C	69 % RH	HG	male	26	9	0.2442	0.0240404	Left	Hindwing	uns	wet	89.5326	NA	4.9948	0.0672448	3	0.07433	w	3	2017-07-19	0.259316
2777	moll	849	India	2	moll_239	Plant_4	24 C	69 % RH	ItG	female	26	8	0.3714	0.0276465	Left	Forewing	uns	wet	112.269	NA	3.7295	0.0758989	3	0.07433	w	4	2017-07-19	0.275498
2778	moll	849	India	2	moll_239	Plant_4	24 C	69 % RH	ItG	female	26	8	0.3714	0.0276465	Left	Hindwing	uns	wet	125.916	NA	12.6453	0.0758989	3	0.07433	w	4	2017-07-19	0.275498
2781	moll	850	India	2	moll_239	Plant_4	24 C	69 % RH	ItG	female	26	6	0.4172	0.0287392	Left	Forewing	uns	wet	119.365	NA	3.4318	0.0606301	3	0.07433	d	3	2017-07-19	0.246232
2782	moll	850	India	2	moll_239	Plant_4	24 C	69 % RH	ItG	female	26	6	0.4172	0.0287392	Left	Hindwing	uns	wet	129.068	NA	13.5907	0.0606301	3	0.07433	d	3	2017-07-19	0.246232
2783	moll	851	India	2	moll_239	Plant_4	24 C	69 % RH	ItG	female	26	8	0.3896	0.0280909	Left	Forewing	uns	wet	103.316	NA	NA	0.0735397	3	0.07433	w	3	2017-07-19	0.271182
2784	moll	851	India	2	moll_239	Plant_4	24 C	69 % RH	ItG	female	26	8	0.3896	0.0280909	Left	Hindwing	uns	wet	128.421	NA	11.2783	0.0735397	3	0.07433	w	3	2017-07-19	0.271182
2785	moll	852	India	2	moll_239	Plant_4	24 C	69 % RH	ItG	female	27	9	0.3355	0.0257356	Left	Forewing	uns	int	114.148	NA	3.5669	0.0503985	2	0.04792	d	3	2017-07-19	0.224496
2786	moll	852	India	2	moll_239	Plant_4	24 C	69 % RH	ItG	female	27	9	0.3355	0.0257356	Left	Hindwing	uns	int	114.805	NA	11.9576	0.0503985	2	0.04792	d	3	2017-07-19	0.224496
2787	moll	853	India	2	moll_234	Plant_4	24 C	69 % RH	TG2	male	26	8	0.3454	0.0269857	Left	Forewing	uns	wet	104.275	NA	0.8991	0.0972063	3	0.07433	w	3	2017-07-19	0.311779
2788	moll	853	India	2	moll_234	Plant_4	24 C	69 % RH	TG2	male	26	8	0.3454	0.0269857	Left	Hindwing	uns	wet	114.79	NA	8.1567	0.0972063	3	0.07433	w	3	2017-07-19	0.311779
2789	moll	854	India	2	moll_234	Plant_4	24 C	69 % RH	TG2	female	28	8	0.3942	0.0261867	Left	Forewing	uns	wet	123.443	NA	1.98	0.0988975	4	0.09885	w	4	2017-07-19	0.31448
2790	moll	854	India	2	moll_234	Plant_4	24 C	69 % RH	TG2	female	28	8	0.3942	0.0261867	Left	Hindwing	uns	wet	133.295	NA	10.8265	0.0988975	4	0.09885	w	4	2017-07-19	0.31448
2791	moll	855	India	2	moll_244	Plant_4	24 C	69 % RH	ThinG	male	27	8	0.3956	0.0271887	Left	Forewing	uns	wet	111.199	NA	1.3967	0.0550806	3	0.07433	w	4	2017-07-21	0.234693
2792	moll	855	India	2	moll_244	Plant_4	24 C	69 % RH	ThinG	male	27	8	0.3956	0.0271887	Left	Hindwing	uns	wet	125.692	NA	8.885	0.0550806	3	0.07433	w	4	2017-07-21	0.234693
2793	moll	857	India	2	moll_237	Plant_4	24 C	69 % RH	TG2	female	28	9	0.2838	0.02347	Left	Forewing	uns	wet	95.1648	NA	2.1528	0.108372	3	0.07433	w	4	2017-07-19	0.329199
2794	moll	857	India	2	moll_237	Plant_4	24 C	69 % RH	TG2	female	28	9	0.2838	0.02347	Left	Hindwing	uns	wet	83.9912	NA	8.8505	0.108372	3	0.07433	w	4	2017-07-19	0.329199
2795	moll	858	India	2	moll_240	Plant_4	24 C	69 % RH	TG2	male	28	8	0.2867	0.0235497	Left	Forewing	uns	dry	93.4332	NA	2.648	0.0306952	1	0.02026	d	2	2017-07-19	0.175201
2796	moll	858	India	2	moll_240	Plant_4	24 C	69 % RH	TG2	male	28	8	0.2867	0.0235497	Left	Hindwing	uns	dry	107.424	NA	10.8233	0.0306952	1	0.02026	d	2	2017-07-19	0.175201
2799	moll	860	India	2	moll_237	Plant_4	24 C	69 % RH	TG2	female	29	NA	0.3127	0.0234051	Left	Forewing	uns	wet	NA	NA	2.9189	NA	3	0.07433	w	4	2017-07-19	NA
2800	moll	860	India	2	moll_237	Plant_4	24 C	69 % RH	TG2	female	29	NA	0.3127	0.0234051	Left	Hindwing	uns	wet	NA	NA	10.3062	NA	3	0.07433	w	4	2017-07-19	NA
2801	moll	861	India	2	moll_237	Plant_4	24 C	69 % RH	TG2	male	31	9	0.3899	0.0235662	Left	Forewing	uns	int	114.041	NA	2.9706	0.0420043	2	0.04792	w	3	2017-07-19	0.204949
2802	moll	861	India	2	moll_237	Plant_4	24 C	69 % RH	TG2	male	31	9	0.3899	0.0235662	Left	Hindwing	uns	int	129.62	NA	10.821	0.0420043	2	0.04792	w	3	2017-07-19	0.204949
2803	moll	862	India	2	moll_237	Plant_4	24 C	69 % RH	TG2	female	30	9	0.3357	0.0231666	Left	Forewing	uns	wet	102.974	NA	2.6189	0.0884234	3	0.07433	d	3	2017-07-19	0.297361
2804	moll	862	India	2	moll_237	Plant_4	24 C	69 % RH	TG2	female	30	9	0.3357	0.0231666	Left	Hindwing	uns	wet	111.052	NA	11.4535	0.0884234	3	0.07433	d	3	2017-07-19	0.297361
2805	moll	863	India	2	moll_236	Plant_4	24 C	69 % RH	TG2	female	30	NA	0.3317	0.0230742	Left	Forewing	uns	wet	106.019	NA	2.8606	0.080851	3	0.07433	w	4	2017-07-19	0.284343
2806	moll	863	India	2	moll_236	Plant_4	24 C	69 % RH	TG2	female	30	NA	0.3317	0.0230742	Left	Hindwing	uns	wet	114.6	NA	11.0388	0.080851	3	0.07433	w	4	2017-07-19	0.284343
2807	moll	864	India	2	moll_234	Plant_4	24 C	69 % RH	TG2	male	31	9	0.3779	0.0233219	Left	Forewing	uns	wet	105.989	NA	1.1335	0.081025	3	0.07433	w	4	2017-07-19	0.284649
2808	moll	864	India	2	moll_234	Plant_4	24 C	69 % RH	TG2	male	31	9	0.3779	0.0233219	Left	Hindwing	uns	wet	118.279	NA	8.8416	0.081025	3	0.07433	w	4	2017-07-19	0.284649
2809	moll	865	India	2	moll_235	Plant_4	24 C	69 % RH	TG2	female	31	8	0.2569	0.0205066	Left	Forewing	uns	wet	89.8196	NA	2.0192	0.0846713	3	0.07433	w	4	2017-07-19	0.290983
2810	moll	865	India	2	moll_235	Plant_4	24 C	69 % RH	TG2	female	31	8	0.2569	0.0205066	Left	Hindwing	uns	wet	96.8238	NA	9.185	0.0846713	3	0.07433	w	4	2017-07-19	0.290983
2811	moll	866	India	2	moll_237	Plant_4	24 C	69 % RH	TG2	female	31	9	0.3556	0.0228538	Left	Forewing	uns	dry	NA	NA	2.2688	NA	1	0.02026	d	2	2017-07-19	NA
2812	moll	866	India	2	moll_237	Plant_4	24 C	69 % RH	TG2	female	31	9	0.3556	0.0228538	Left	Hindwing	uns	dry	NA	NA	9.2204	NA	1	0.02026	d	2	2017-07-19	NA
2813	moll	867	India	2	moll_235	Plant_4	24 C	69 % RH	TG2	female	30	9	0.3328	0.0230997	Left	Forewing	uns	wet	113.25	NA	2.5746	0.0951437	4	0.09885	w	4	2017-07-19	0.308454
2814	moll	867	India	2	moll_235	Plant_4	24 C	69 % RH	TG2	female	30	9	0.3328	0.0230997	Left	Hindwing	uns	wet	120.657	NA	10.3487	0.0951437	4	0.09885	w	4	2017-07-19	0.308454
2815	moll	869	India	2	moll_247	Plant_4	24 C	69 % RH	TG	female	25	8	0.2475	0.0251141	Left	Forewing	uns	int	87.279	NA	2.5942	0.0627072	2	0.04792	d	3	2017-07-29	0.250414
2816	moll	869	India	2	moll_247	Plant_4	24 C	69 % RH	TG	female	25	8	0.2475	0.0251141	Left	Hindwing	uns	int	97.4354	NA	12.1994	0.0627072	2	0.04792	d	3	2017-07-29	0.250414
2819	moll	870	India	2	moll_243.1	Plant_4	24 C	69 % RH	GrTG	male	24	9	0.2737	0.0270529	Left	Forewing	uns	wet	83.8169	NA	1.6865	0.066713	3	0.07433	w	4	2017-07-29	0.258289
2820	moll	870	India	2	moll_243.1	Plant_4	24 C	69 % RH	GrTG	male	24	9	0.2737	0.0270529	Left	Hindwing	uns	wet	95.5271	NA	6.9449	0.066713	3	0.07433	w	4	2017-07-29	0.258289
2821	moll	871	India	2	moll_247	Plant_4	24 C	69 % RH	TG	female	26	8	0.358	0.02731	Left	Forewing	uns	int	114.43	NA	3.6218	0.0642256	2	0.04792	d	3	2017-07-29	0.253428
2822	moll	871	India	2	moll_247	Plant_4	24 C	69 % RH	TG	female	26	8	0.358	0.02731	Left	Hindwing	uns	int	127.938	NA	14.108	0.0642256	2	0.04792	d	3	2017-07-29	0.253428
2823	moll	872	India	2	moll_247	Plant_4	24 C	69 % RH	TG	male	26	8	0.3063	0.0259264	Left	Forewing	uns	int	101.187	NA	3.3998	0.0355219	2	0.04792	d	3	2017-07-29	0.188473
2824	moll	872	India	2	moll_247	Plant_4	24 C	69 % RH	TG	male	26	8	0.3063	0.0259264	Left	Hindwing	uns	int	112.094	NA	13.0149	0.0355219	2	0.04792	d	3	2017-07-29	0.188473
2825	moll	873	India	2	moll_247	Plant_4	24 C	69 % RH	TG	male	26	8	0.2469	0.0241287	Left	Forewing	uns	int	82.306	NA	1.9529	0.0449387	2	0.04792	d	3	2017-07-29	0.211987
2826	moll	873	India	2	moll_247	Plant_4	24 C	69 % RH	TG	male	26	8	0.2469	0.0241287	Left	Hindwing	uns	int	94.491	NA	10.7691	0.0449387	2	0.04792	d	3	2017-07-29	0.211987
2827	moll	874	India	2	moll_247	Plant_4	24 C	69 % RH	TG	male	25	9	0.2649	0.0256894	Left	Forewing	uns	int	89.9871	NA	1.7165	0.0581058	2	0.04792	d	3	2017-07-29	0.241051
2828	moll	874	India	2	moll_247	Plant_4	24 C	69 % RH	TG	male	25	9	0.2649	0.0256894	Left	Hindwing	uns	int	105.915	NA	11.8785	0.0581058	2	0.04792	d	3	2017-07-29	0.241051
2829	moll	875	India	2	moll_247	Plant_4	24 C	69 % RH	TG	male	29	9	0.3043	0.0231937	Left	Forewing	uns	int	96.9866	NA	2.2572	NA	2	0.04792	d	3	2017-07-29	NA
2830	moll	875	India	2	moll_247	Plant_4	24 C	69 % RH	TG	male	29	9	0.3043	0.0231937	Left	Hindwing	uns	int	110.343	NA	11.2197	NA	2	0.04792	d	3	2017-07-29	NA
2831	moll	876	India	2	moll_247	Plant_4	24 C	69 % RH	TG	male	29	7	0.3265	0.0237445	Left	Forewing	uns	int	111.232	NA	3.7844	0.0624313	3	0.07433	d	2	2017-07-29	0.249863
2832	moll	876	India	2	moll_247	Plant_4	24 C	69 % RH	TG	male	29	7	0.3265	0.0237445	Left	Hindwing	uns	int	119.88	NA	13.317	0.0624313	3	0.07433	d	2	2017-07-29	0.249863
2833	moll	877	India	2	moll_247	Plant_4	24 C	69 % RH	TG	male	29	8	0.346	0.0242081	Left	Forewing	uns	wet	113.186	NA	2.611	0.0765955	3	0.07433	d	2	2017-07-29	0.276759
2834	moll	877	India	2	moll_247	Plant_4	24 C	69 % RH	TG	male	29	8	0.346	0.0242081	Left	Hindwing	uns	wet	118.252	NA	13.1397	0.0765955	3	0.07433	d	2	2017-07-29	0.276759
2835	moll	878	India	2	moll_243.1	Plant_4	24 C	69 % RH	GrTG	female	32	7	0.3513	0.02205	Left	Forewing	uns	int	110.124	NA	3.5712	0.0482515	2	0.04792	w	4	2017-07-29	0.219662
2836	moll	878	India	2	moll_243.1	Plant_4	24 C	69 % RH	GrTG	female	32	7	0.3513	0.02205	Left	Hindwing	uns	int	120.49	NA	12.5791	0.0482515	2	0.04792	w	4	2017-07-29	0.219662
2837	moll	879	India	2	moll_247	Plant_4	24 C	69 % RH	TG	male	31	8	0.3088	0.0218037	Left	Forewing	uns	int	102.085	NA	2.9866	0.0532791	2	0.04792	d	3	2017-07-29	0.230823
2838	moll	879	India	2	moll_247	Plant_4	24 C	69 % RH	TG	male	31	8	0.3088	0.0218037	Left	Hindwing	uns	int	115.218	NA	11.4934	0.0532791	2	0.04792	d	3	2017-07-29	0.230823
2841	moll	880	India	2	moll_243.1	Plant_4	24 C	69 % RH	GrTG	male	31	8	0.3231	0.0221352	Left	Forewing	uns	int	103.079	NA	3.1908	0.0340265	2	0.04792	d	2	2017-07-29	0.184463
2842	moll	880	India	2	moll_243.1	Plant_4	24 C	69 % RH	GrTG	male	31	8	0.3231	0.0221352	Left	Hindwing	uns	int	115.096	NA	11.9444	0.0340265	2	0.04792	d	2	2017-07-29	0.184463
2843	moll	881	India	2	moll_247	Plant_4	24 C	69 % RH	TG	male	34	8	0.3921	0.0215272	Left	Forewing	uns	int	108.224	NA	2.7369	0.0502224	2	0.04792	d	3	2017-07-29	0.224104
2844	moll	881	India	2	moll_247	Plant_4	24 C	69 % RH	TG	male	34	8	0.3921	0.0215272	Left	Hindwing	uns	int	125.5	NA	9.3023	0.0502224	2	0.04792	d	3	2017-07-29	0.224104
2845	moll	882	India	2	moll_247	Plant_4	24 C	69 % RH	TG	female	37	NA	0.3766	0.0195175	Left	Forewing	uns	wet	NA	NA	NA	0.061258	3	0.07433	w	3	2017-07-29	0.247504
2846	moll	882	India	2	moll_247	Plant_4	24 C	69 % RH	TG	female	37	NA	0.3766	0.0195175	Left	Hindwing	uns	wet	139.241	NA	9.5428	0.061258	3	0.07433	w	3	2017-07-29	0.247504
2847	moll	883	India	2	moll_245	Plant_4	24 C	69 % RH	GrTG	female	37	NA	0.1721	0.0150334	Left	Forewing	uns	wet	117.391	NA	2.1879	0.0682407	3	0.07433	w	4	2017-07-29	0.261229
2848	moll	883	India	2	moll_245	Plant_4	24 C	69 % RH	GrTG	female	37	NA	0.1721	0.0150334	Left	Hindwing	uns	wet	133.39	NA	8.1188	0.0682407	3	0.07433	w	4	2017-07-29	0.261229
2849	moll	884	India	2	moll_251	Plant_4	24 C	69 % RH	ThinG	female	21	7	0.4144	0.0355021	Left	Forewing	uns	wet	125.614	NA	1.6379	0.110931	3	0.07433	w	3	2017-09-02	0.333064
2850	moll	884	India	2	moll_251	Plant_4	24 C	69 % RH	ThinG	female	21	7	0.4144	0.0355021	Left	Hindwing	uns	wet	135.529	NA	10.1927	0.110931	3	0.07433	w	3	2017-09-02	0.333064
2851	moll	885	India	2	moll_251	Plant_4	24 C	69 % RH	ThinG	male	21	7	0.4239	0.0357713	Left	Forewing	uns	wet	107.363	NA	0.8403	0.0927301	3	0.07433	w	4	2017-09-02	0.304516
2852	moll	885	India	2	moll_251	Plant_4	24 C	69 % RH	ThinG	male	21	7	0.4239	0.0357713	Left	Hindwing	uns	wet	120.893	NA	7.0852	0.0927301	3	0.07433	w	4	2017-09-02	0.304516
2853	moll	886	India	2	moll_251	Plant_4	24 C	69 % RH	ThinG	female	20	7	0.3757	0.0360787	Left	Forewing	uns	wet	110.477	NA	1.7822	0.0964083	3	0.07433	w	4	2017-09-02	0.310497
2854	moll	886	India	2	moll_251	Plant_4	24 C	69 % RH	ThinG	female	20	7	0.3757	0.0360787	Left	Hindwing	uns	wet	127.634	NA	9.9103	0.0964083	3	0.07433	w	4	2017-09-02	0.310497
2855	moll	887	India	2	moll_251	Plant_4	24 C	69 % RH	ThinG	male	21	7	0.4064	0.0352722	Left	Forewing	uns	wet	102.289	NA	0.8878	0.0777463	3	0.07433	w	4	2017-09-02	0.27883
2856	moll	887	India	2	moll_251	Plant_4	24 C	69 % RH	ThinG	male	21	7	0.4064	0.0352722	Left	Hindwing	uns	wet	120.017	NA	6.9127	0.0777463	3	0.07433	w	4	2017-09-02	0.27883
2857	moll	888	India	2	moll_251	Plant_4	24 C	69 % RH	ThinG	female	20	8	0.3738	0.0360177	Left	Forewing	uns	wet	NA	NA	NA	0.111014	3	0.07433	w	4	2017-09-02	0.333188
2858	moll	888	India	2	moll_251	Plant_4	24 C	69 % RH	ThinG	female	20	8	0.3738	0.0360177	Left	Hindwing	uns	wet	NA	NA	NA	0.111014	3	0.07433	w	4	2017-09-02	0.333188
2859	moll	889	India	2	moll_251	Plant_4	24 C	69 % RH	ThinG	male	21	7	0.3582	0.0338186	Left	Forewing	uns	wet	99.1842	NA	0.9773	0.0859554	3	0.07433	w	4	2017-09-02	0.293181
2860	moll	889	India	2	moll_251	Plant_4	24 C	69 % RH	ThinG	male	21	7	0.3582	0.0338186	Left	Hindwing	uns	wet	116.504	NA	7.9535	0.0859554	3	0.07433	w	4	2017-09-02	0.293181
2863	moll	890	India	2	moll_251	Plant_4	24 C	69 % RH	ThinG	male	21	7	0.4046	0.03522	Left	Forewing	uns	wet	96.3649	NA	0.9147	0.0827514	3	0.07433	w	4	2017-09-02	0.287665
2864	moll	890	India	2	moll_251	Plant_4	24 C	69 % RH	ThinG	male	21	7	0.4046	0.03522	Left	Hindwing	uns	wet	128.659	NA	6.9247	0.0827514	3	0.07433	w	4	2017-09-02	0.287665
2865	moll	891	India	2	moll_252	Plant_4	24 C	69 % RH	TG2	male	24	8	0.222	0.0252294	Left	Forewing	uns	int	75.0781	NA	1.029	0.0677043	2	0.04792	w	4	2017-09-02	0.260201
2866	moll	891	India	2	moll_252	Plant_4	24 C	69 % RH	TG2	male	24	8	0.222	0.0252294	Left	Hindwing	uns	int	81.8884	NA	6.1149	0.0677043	2	0.04792	w	4	2017-09-02	0.260201
2867	moll	892	India	2	moll_252	Plant_4	24 C	69 % RH	TG2	female	23	7	0.2626	0.0278422	Left	Forewing	uns	wet	91.0477	NA	1.4945	0.0785216	3	0.07433	w	4	2017-09-02	0.280217
2868	moll	892	India	2	moll_252	Plant_4	24 C	69 % RH	TG2	female	23	7	0.2626	0.0278422	Left	Hindwing	uns	wet	96.9135	NA	7.9721	0.0785216	3	0.07433	w	4	2017-09-02	0.280217
2869	moll	893	India	2	moll_251	Plant_4	24 C	69 % RH	ThinG	male	24	9	0.4039	0.0307997	Left	Forewing	uns	wet	120.926	NA	2.1779	0.0746177	3	0.07433	w	4	2017-09-02	0.273162
2870	moll	893	India	2	moll_251	Plant_4	24 C	69 % RH	ThinG	male	24	9	0.4039	0.0307997	Left	Hindwing	uns	wet	135.19	NA	8.8518	0.0746177	3	0.07433	w	4	2017-09-02	0.273162
2871	moll	894	India	2	moll_251	Plant_4	24 C	69 % RH	ThinG	female	23	7	0.3655	0.0310862	Left	Forewing	uns	wet	121.195	NA	2.4679	0.0772514	3	0.07433	w	3	2017-09-02	0.277941
2872	moll	894	India	2	moll_251	Plant_4	24 C	69 % RH	ThinG	female	23	7	0.3655	0.0310862	Left	Hindwing	uns	wet	128.505	NA	10.1105	0.0772514	3	0.07433	w	3	2017-09-02	0.277941
2873	moll	895	India	2	moll_252	Plant_4	24 C	69 % RH	TG2	male	25	8	0.3026	0.0268545	Left	Forewing	uns	wet	92.9214	NA	1.8724	0.0674635	3	0.07433	w	4	2017-09-02	0.259737
2874	moll	895	India	2	moll_252	Plant_4	24 C	69 % RH	TG2	male	25	8	0.3026	0.0268545	Left	Hindwing	uns	wet	106.056	NA	7.6313	0.0674635	3	0.07433	w	4	2017-09-02	0.259737
2875	moll	896	India	2	moll_251	Plant_4	24 C	69 % RH	ThinG	female	25	8	0.4539	0.0307407	Left	Forewing	uns	wet	122.681	NA	1.8629	0.0909515	3	0.07433	w	4	2017-09-02	0.301582
2876	moll	896	India	2	moll_251	Plant_4	24 C	69 % RH	ThinG	female	25	8	0.4539	0.0307407	Left	Hindwing	uns	wet	142.706	NA	10.9805	0.0909515	3	0.07433	w	4	2017-09-02	0.301582
2877	moll	897	India	2	moll_252	Plant_4	24 C	69 % RH	TG2	male	25	8	0.2163	0.0240111	Left	Forewing	uns	int	72.6118	NA	1.5914	0.048057	2	0.04792	w	3	2017-09-02	0.219219
2878	moll	897	India	2	moll_252	Plant_4	24 C	69 % RH	TG2	male	25	8	0.2163	0.0240111	Left	Hindwing	uns	int	81.8923	NA	5.4211	0.048057	2	0.04792	w	3	2017-09-02	0.219219
2879	moll	898	India	2	moll_252	Plant_4	24 C	69 % RH	TG2	male	25	8	0.2469	0.0250938	Left	Forewing	uns	int	80.5961	NA	1.7507	0.0418455	2	0.04792	w	3	2017-09-02	0.204562
2880	moll	898	India	2	moll_252	Plant_4	24 C	69 % RH	TG2	male	25	8	0.2469	0.0250938	Left	Hindwing	uns	int	89.5198	NA	6.4436	0.0418455	2	0.04792	w	3	2017-09-02	0.204562
2881	moll	899	India	2	moll_251	Plant_4	24 C	69 % RH	ThinG	female	25	8	0.3898	0.0292196	Left	Forewing	uns	wet	116.002	NA	2.355	0.0805997	3	0.07433	w	4	2017-09-02	0.283901
2882	moll	899	India	2	moll_251	Plant_4	24 C	69 % RH	ThinG	female	25	8	0.3898	0.0292196	Left	Hindwing	uns	wet	125.916	NA	8.997	0.0805997	3	0.07433	w	4	2017-09-02	0.283901
2885	moll	900	India	2	moll_251	Plant_4	24 C	69 % RH	ThinG	male	28	8	0.4531	0.0274309	Left	Forewing	uns	wet	107.331	NA	1.0397	0.071203	3	0.07433	w	4	2017-09-02	0.266839
2886	moll	900	India	2	moll_251	Plant_4	24 C	69 % RH	ThinG	male	28	8	0.4531	0.0274309	Left	Hindwing	ups	wet	130.584	NA	8.1015	0.071203	3	0.07433	w	4	2017-09-02	0.266839
609	moore	25-05-01	Ghana	2	moore_5.1	Temp_1	25 C	75 % RH	CY	male	22	12	0.4153	0.0339129	Left	Forewing	ups	wet	94.9823	0.3672	1.037	0.0183308	NA	NA	NA	NA	100	0.135391
1659	moore	25-05-01	Ghana	2	moore_5.1	Temp_1	25 C	75 % RH	CY	male	22	12	0.4153	0.0339129	Right	Hindwing	uns	wet	115.206	3.2892	9.4516	0.0360857	NA	NA	NA	NA	100	0.189962
454	moore	25-05-02	Ghana	2	moore_5.1	Temp_1	25 C	75 % RH	CY	female	22	11	0.4671	0.035268	Right	Forewing	uns	wet	135.194	0.8142	2.957	0.0249378	NA	NA	NA	NA	100	0.158124
1303	moore	25-05-02	Ghana	2	moore_5.1	Temp_1	25 C	75 % RH	CY	female	22	11	0.4671	0.035268	Right	Hindwing	uns	wet	165.935	3.6819	12.0973	0.0534513	NA	NA	NA	NA	100	0.258297
597	moore	25-05-03	Ghana	2	moore_5.1	Temp_1	25 C	75 % RH	CY	female	22	11	0.4375	0.0345067	Left	Forewing	ups	wet	128.269	0.75145	2.6196	0.0145523	NA	NA	NA	NA	100	0.121436
1656	moore	25-05-03	Ghana	2	moore_5.1	Temp_1	25 C	75 % RH	CY	female	22	11	0.4375	0.0345067	Left	Hindwing	ups	wet	130.463	3.5969	13.0244	0.0318686	NA	NA	NA	NA	100	0.178674
675	moore	25-05-05	Ghana	2	moore_5.1	Temp_1	25 C	75 % RH	CY	female	23	10	0.5538	0.0357045	Left	Forewing	ups	dry	157.03	1.2791	4.40175	0.00644926	NA	NA	NA	NA	100	0.0844888
1926	moore	25-05-05	Ghana	2	moore_5.1	Temp_1	25 C	75 % RH	CY	female	23	10	0.5538	0.0357045	Left	Hindwing	ups	dry	141.44	3.5796	14.0689	0.00729495	NA	NA	NA	NA	100	0.0854105
960	moore	25-05-06	Ghana	2	moore_5.1	Temp_1	25 C	75 % RH	CY	male	23	10	0.5225	0.0350188	Right	Forewing	uns	dry	138.412	0.73055	2.3511	0.00225961	NA	NA	NA	NA	100	0.05311
1907	moore	25-05-06	Ghana	2	moore_5.1	Temp_1	25 C	75 % RH	CY	male	23	10	0.5225	0.0350188	Left	Hindwing	ups	dry	152.88	3.92005	15.3314	0.00459803	NA	NA	NA	NA	100	0.0730663
692	moore	25-05-07	Ghana	2	moore_5.1	Temp_1	25 C	75 % RH	CY	female	24	10	0.5397	0.0339239	Left	Forewing	ups	dry	155.209	1.2465	4.50925	0.0060591	NA	NA	NA	NA	100	0.0782717
1817	moore	25-05-07	Ghana	2	moore_5.1	Temp_1	25 C	75 % RH	CY	female	24	10	0.5397	0.0339239	Right	Hindwing	uns	dry	155.425	3.8104	15.6029	0.00734704	NA	NA	NA	NA	100	0.0831127
3	moore	25-05-08	Ghana	2	moore_5.1	Temp_1	25 C	75 % RH	CY	male	24	10	0.5594	0.0343318	Right	Forewing	uns	dry	150.109	0.8139	2.7206	0.00135153	NA	NA	NA	NA	100	NA
2020	moore	25-05-08	Ghana	2	moore_5.1	Temp_1	25 C	75 % RH	CY	male	24	10	0.5594	0.0343318	Left	Hindwing	ups	dry	157.903	3.7792	13.9292	0.00443721	NA	NA	NA	NA	100	0.0692389
735	moore	25-05-09	Ghana	2	moore_5.1	Temp_1	25 C	75 % RH	CY	NA	24	9	0.4146	0.0310693	Right	Forewing	uns	dry	123.403	0.7562	3.1504	0.0058258	NA	NA	NA	NA	100	0.0772084
1709	moore	25-05-09	Ghana	2	moore_5.1	Temp_1	25 C	75 % RH	CY	NA	24	9	0.4146	0.0310693	Left	Hindwing	ups	dry	125.194	3.4944	13.3064	0.0124503	NA	NA	NA	NA	100	0.113933
957	moore	25-05-10	Ghana	2	moore_5.1	Temp_1	25 C	75 % RH	CY	male	24	10	0.5753	0.034654	Right	Forewing	uns	dry	148.053	0.9843	3.30235	0.00225976	NA	NA	NA	NA	100	0.0470314
1912	moore	25-05-10	Ghana	2	moore_5.1	Temp_1	25 C	75 % RH	CY	male	24	10	0.5753	0.034654	Left	Hindwing	ups	dry	156.757	4.86925	18.3595	0.00497839	NA	NA	NA	NA	100	0.0741423
625	moore	25-05-11	Ghana	2	moore_5.1	Temp_1	25 C	75 % RH	CY	female	NA	NA	NA	NA	Left	Forewing	ups	dry	143.562	1.01595	3.75245	0.00821399	NA	NA	NA	NA	100	0.0939475
1670	moore	25-05-11	Ghana	2	moore_5.1	Temp_1	25 C	75 % RH	CY	female	NA	NA	NA	NA	Left	Hindwing	ups	dry	149.927	3.61655	14.1433	0.0207825	NA	NA	NA	NA	100	0.144104
832	moore	25-05-12	Ghana	2	moore_5.1	Temp_1	25 C	75 % RH	CY	male	26	9	0.4998	0.0305229	Left	Forewing	ups	dry	136.753	0.7368	2.40175	0.00458202	NA	NA	NA	NA	100	0.067667
1929	moore	25-05-12	Ghana	2	moore_5.1	Temp_1	25 C	75 % RH	CY	male	26	9	0.4998	0.0305229	Left	Hindwing	ups	dry	145.323	3.7792	14.6307	0.00652827	NA	NA	NA	NA	100	0.0807702
784	moore	25-05-13	Ghana	2	moore_5.1	Temp_1	25 C	75 % RH	CY	female	27	10	0.4691	0.0287778	Left	Forewing	ups	dry	146.901	1.1786	4.5678	0.00483629	NA	NA	NA	NA	100	0.0673866
1877	moore	25-05-13	Ghana	2	moore_5.1	Temp_1	25 C	75 % RH	CY	female	27	10	0.4691	0.0287778	Left	Hindwing	ups	dry	155.202	4.8091	19.245	0.00719868	NA	NA	NA	NA	100	0.0880255
627	moore	25-05-14	Ghana	2	moore_5.1	Temp_1	25 C	75 % RH	CY	female	28	9	0.4079	0.0264866	Right	Forewing	uns	int	129.371	0.9504	3.1396	0.00964771	NA	NA	NA	NA	100	0.0956211
1712	moore	25-05-14	Ghana	2	moore_5.1	Temp_1	25 C	75 % RH	CY	female	28	9	0.4079	0.0264866	Left	Hindwing	ups	int	119.583	3.6248	14.1496	0.0185402	NA	NA	NA	NA	100	0.136163
978	moore	25-06-01	Ghana	3	moore_6.2	Temp_2	25 C	75 % RH	CY	female	21	9	0.5634	0.0393296	Left	Forewing	ups	dry	161.737	1.3292	4.985	0.00334376	NA	NA	NA	NA	154	0.0569876
1781	moore	25-06-01	Ghana	3	moore_6.2	Temp_2	25 C	75 % RH	CY	female	21	9	0.5634	0.0393296	Left	Hindwing	ups	dry	168.837	4.1295	15.9299	0.00882656	NA	NA	NA	NA	154	0.0960013
708	moore	25-06-01a	Ghana	2	moore_6.1	Temp_1	25 C	75 % RH	CY	female	22	10	0.5523	0.0372937	Left	Forewing	ups	dry	160.591	1.29375	4.5936	0.00494159	NA	NA	NA	NA	101	0.0692438
1757	moore	25-06-01a	Ghana	2	moore_6.1	Temp_1	25 C	75 % RH	CY	female	22	10	0.5523	0.0372937	Left	Hindwing	ups	dry	170.751	4.18525	16.2547	0.00973944	NA	NA	NA	NA	101	0.0996314
66	moore	25-06-02	Ghana	3	moore_6.2	Temp_2	25 C	75 % RH	CY	male	22	10	0.5257	0.0366851	Right	Forewing	uns	dry	145.439	0.77085	2.4884	0.00464722	NA	NA	NA	NA	154	0.0688188
1810	moore	25-06-02	Ghana	3	moore_6.2	Temp_2	25 C	75 % RH	CY	male	22	10	0.5257	0.0366851	Right	Hindwing	uns	dry	164.555	3.5763	12.7081	0.00744878	NA	NA	NA	NA	154	0.0833202
691	moore	25-06-02a	Ghana	2	moore_6.1	Temp_1	25 C	75 % RH	CY	male	23	10	0.5065	0.0346576	Left	Forewing	ups	dry	125.671	0.7101	2.66025	0.00639643	NA	NA	NA	NA	101	0.0826316
1999	moore	25-06-02a	Ghana	2	moore_6.1	Temp_1	25 C	75 % RH	CY	male	23	10	0.5065	0.0346576	Right	Hindwing	uns	dry	117.091	3.4442	13.9637	0.00516926	NA	NA	NA	NA	101	0.0796374
779	moore	25-06-03	Ghana	2	moore_6.1	Temp_1	25 C	75 % RH	CY	male	23	9	0.4429	0.0331416	Right	Forewing	uns	dry	111.903	0.7149	2.4935	0.00633634	NA	NA	NA	NA	101	0.0741983
1807	moore	25-06-03	Ghana	2	moore_6.1	Temp_1	25 C	75 % RH	CY	male	23	9	0.4429	0.0331416	Left	Hindwing	ups	dry	125.395	3.03415	11.0951	0.00990449	NA	NA	NA	NA	101	0.100669
67	moore	25-06-03a	Ghana	3	moore_6.2	Temp_2	25 C	75 % RH	CY	female	22	8	0.5588	0.0374394	Right	Forewing	uns	dry	170.09	1.5027	5.4363	0.00391558	NA	NA	NA	NA	154	0.0632295
1747	moore	25-06-03a	Ghana	3	moore_6.2	Temp_2	25 C	75 % RH	CY	female	22	8	0.5588	0.0374394	Right	Hindwing	uns	dry	167.835	5.3975	20.1287	0.0105352	NA	NA	NA	NA	154	0.105521
115	moore	25-06-04	Ghana	3	moore_6.2	Temp_2	25 C	75 % RH	CY	female	22	8	0.5398	0.0370102	Left	Forewing	ups	dry	157.635	1.21475	5.32365	0.00441484	NA	NA	NA	NA	154	0.0631198
1762	moore	25-06-04	Ghana	3	moore_6.2	Temp_2	25 C	75 % RH	CY	female	22	8	0.5398	0.0370102	Left	Hindwing	ups	dry	164.873	4.6643	17.9597	0.0105858	NA	NA	NA	NA	154	0.1031
694	moore	25-06-04a	Ghana	2	moore_6.1	Temp_1	25 C	75 % RH	CY	NA	24	9	0.4658	0.032299	Left	Forewing	ups	dry	135.438	0.9237	3.16145	0.00717062	NA	NA	NA	NA	101	0.0862424
1737	moore	25-06-04a	Ghana	2	moore_6.1	Temp_1	25 C	75 % RH	CY	NA	24	9	0.4658	0.032299	Left	Hindwing	ups	dry	138.297	4.2617	15.9641	0.00913256	NA	NA	NA	NA	101	0.095941
1014	moore	25-06-05	Ghana	3	moore_6.2	Temp_2	25 C	75 % RH	CY	male	22	8	0.5099	0.0363139	Right	Forewing	uns	dry	132.89	0.67275	2.89415	0.0079832	NA	NA	NA	NA	154	0.0913189
1719	moore	25-06-05	Ghana	3	moore_6.2	Temp_2	25 C	75 % RH	CY	male	22	8	0.5099	0.0363139	Right	Hindwing	uns	dry	135.926	4.9899	17.433	0.0117371	NA	NA	NA	NA	154	0.121877
688	moore	25-06-05a	Ghana	2	moore_6.1	Temp_1	25 C	75 % RH	CY	male	24	10	0.5331	0.0337851	Left	Forewing	ups	dry	145.565	0.93035	3.23095	0.00650868	NA	NA	NA	NA	101	0.0791479
1760	moore	25-06-05a	Ghana	2	moore_6.1	Temp_1	25 C	75 % RH	CY	male	24	10	0.5331	0.0337851	Left	Hindwing	ups	dry	151.085	4.34215	17.8858	0.0086234	NA	NA	NA	NA	101	0.0965733
60	moore	25-06-06	Ghana	3	moore_6.2	Temp_2	25 C	75 % RH	CY	male	24	9	0.5272	0.03366	Right	Forewing	uns	dry	140.216	1.06915	4.0966	0.0086966	NA	NA	NA	NA	154	0.0957377
1845	moore	25-06-06	Ghana	3	moore_6.2	Temp_2	25 C	75 % RH	CY	male	24	9	0.5272	0.03366	Right	Hindwing	uns	dry	148.828	5.1354	19.5612	0.00688279	NA	NA	NA	NA	154	0.0831302
207	moore	25-06-06a	Ghana	2	moore_6.1	Temp_1	25 C	75 % RH	CY	female	26	7	0.546	0.0314358	Right	Forewing	uns	wet	135.281	0.7337	2.7092	0.0367602	NA	NA	NA	NA	101	0.192031
1271	moore	25-06-06a	Ghana	2	moore_6.1	Temp_1	25 C	75 % RH	CY	female	26	7	0.546	0.0314358	Right	Hindwing	uns	wet	130.321	4.2388	15.4005	0.0765489	NA	NA	NA	NA	101	0.276675
1040	moore	25-06-07	Ghana	3	moore_6.2	Temp_2	25 C	75 % RH	CY	male	24	10	0.5586	0.0343154	Left	Forewing	ups	dry	163.33	1.2393	4.784	0.00460697	NA	NA	NA	NA	154	0.0682236
1811	moore	25-06-07	Ghana	3	moore_6.2	Temp_2	25 C	75 % RH	CY	male	24	10	0.5586	0.0343154	Left	Hindwing	ups	dry	166.608	4.7789	18.4344	0.00696226	NA	NA	NA	NA	154	0.0771118
753	moore	25-06-07a	Ghana	2	moore_6.1	Temp_1	25 C	75 % RH	CY	male	NA	NA	NA	NA	Left	Forewing	ups	dry	150.198	1.0349	3.33975	0.00553073	NA	NA	NA	NA	101	0.0738428
1903	moore	25-06-07a	Ghana	2	moore_6.1	Temp_1	25 C	75 % RH	CY	male	NA	NA	NA	NA	Left	Hindwing	ups	dry	152.685	4.67405	19.5551	0.00582561	NA	NA	NA	NA	101	0.076542
105	moore	25-06-08	Ghana	3	moore_6.2	Temp_2	25 C	75 % RH	CY	male	24	10	0.5954	0.035053	Left	Forewing	ups	dry	160.171	0.89225	3.4034	0.00528534	NA	NA	NA	NA	154	0.0716411
1874	moore	25-06-08	Ghana	3	moore_6.2	Temp_2	25 C	75 % RH	CY	male	24	10	0.5954	0.035053	Left	Hindwing	ups	dry	174.403	5.78225	20.0221	0.00665395	NA	NA	NA	NA	154	0.0835415
808	moore	25-06-08a	Ghana	2	moore_6.1	Temp_1	25 C	75 % RH	CY	male	25	9	0.4625	0.0309336	Right	Forewing	uns	dry	134.208	0.67775	1.91005	0.0046622	NA	NA	NA	NA	101	0.0706375
2025	moore	25-06-08a	Ghana	2	moore_6.1	Temp_1	25 C	75 % RH	CY	male	25	9	0.4625	0.0309336	Right	Hindwing	uns	dry	144.714	3.51675	13.089	0.00501066	NA	NA	NA	NA	101	0.0727987
6	moore	25-06-09	Ghana	3	moore_6.2	Temp_2	25 C	75 % RH	CY	male	25	10	0.612	0.0339607	Left	Forewing	ups	dry	159.833	1.2045	4.6551	NA	NA	NA	NA	NA	154	NA
1945	moore	25-06-09	Ghana	3	moore_6.2	Temp_2	25 C	75 % RH	CY	male	25	10	0.612	0.0339607	Left	Hindwing	ups	dry	168.579	4.2825	18.5609	NA	NA	NA	NA	NA	154	NA
741	moore	25-06-09a	Ghana	2	moore_6.1	Temp_1	25 C	75 % RH	CY	female	26	9	0.4181	0.0287599	Right	Forewing	uns	dry	128.052	0.9972	3.34035	0.00622867	NA	NA	NA	NA	101	0.0778727
1725	moore	25-06-09a	Ghana	2	moore_6.1	Temp_1	25 C	75 % RH	CY	female	26	9	0.4181	0.0287599	Right	Hindwing	uns	dry	129.746	4.4209	18.0619	0.0142398	NA	NA	NA	NA	101	0.117839
698	moore	25-06-10	Ghana	2	moore_6.1	Temp_1	25 C	75 % RH	CY	female	26	9	0.535	0.0312232	Right	Forewing	uns	dry	164.998	1.3816	4.5124	0.00567336	NA	NA	NA	NA	101	0.0732333
1714	moore	25-06-10	Ghana	2	moore_6.1	Temp_1	25 C	75 % RH	CY	female	26	9	0.535	0.0312232	Right	Hindwing	uns	dry	170.813	6.3533	21.4468	0.012621	NA	NA	NA	NA	101	0.110707
22	moore	25-06-11	Ghana	3	moore_6.2	Temp_2	25 C	75 % RH	CY	male	25	10	0.5252	0.0322727	Left	Forewing	ups	dry	153.107	1.188	4.74195	0.00289777	NA	NA	NA	NA	154	0.0567977
1934	moore	25-06-11	Ghana	3	moore_6.2	Temp_2	25 C	75 % RH	CY	male	25	10	0.5252	0.0322727	Right	Hindwing	uns	dry	161.564	4.1077	19.6621	0.00428649	NA	NA	NA	NA	154	0.0653643
620	moore	25-06-11a	Ghana	2	moore_6.1	Temp_1	25 C	75 % RH	CY	female	NA	NA	0.4781	NA	Left	Forewing	ups	int	138.014	1.0338	3.6719	0.00925151	NA	NA	NA	NA	101	0.0947445
101	moore	25-06-12	Ghana	3	moore_6.2	Temp_2	25 C	75 % RH	CY	female	25	9	0.2959	0.0266548	Right	Forewing	uns	dry	92.5958	0.61685	2.4095	0.0115691	NA	NA	NA	NA	154	0.109953
1739	moore	25-06-12	Ghana	3	moore_6.2	Temp_2	25 C	75 % RH	CY	female	25	9	0.2959	0.0266548	Right	Hindwing	uns	dry	82.6975	2.67905	10.8946	0.0214585	NA	NA	NA	NA	154	0.157628
75	moore	25-06-13	Ghana	3	moore_6.2	Temp_2	25 C	75 % RH	CY	male	29	10	0.6174	0.0293624	Left	Forewing	ups	dry	166.648	1.1056	4.1557	0.00479314	NA	NA	NA	NA	154	0.0734348
1756	moore	25-06-13	Ghana	3	moore_6.2	Temp_2	25 C	75 % RH	CY	male	29	10	0.6174	0.0293624	Left	Hindwing	ups	dry	170.646	4.55065	19.0707	0.00839991	NA	NA	NA	NA	154	0.0975426
220	moore	25-06-13a	Ghana	2	moore_6.1	Temp_1	25 C	75 % RH	CY	male	NA	NA	NA	NA	Left	Forewing	ups	wet	97.1008	0.62145	2.3535	0.0498595	NA	NA	NA	NA	101	0.221455
1582	moore	25-06-13a	Ghana	2	moore_6.1	Temp_1	25 C	75 % RH	CY	male	NA	NA	NA	NA	Right	Hindwing	uns	wet	98.3029	2.68455	10.7844	0.0575712	NA	NA	NA	NA	101	0.24718
1035	moore	25-07-01	Ghana	3	moore_7.2	Temp_2	25 C	75 % RH	CY	male	22	10	0.5161	0.0364604	Right	Forewing	uns	dry	157.056	1.0416	4.01285	0.00574116	NA	NA	NA	NA	154	0.0754414
1716	moore	25-07-01	Ghana	3	moore_7.2	Temp_2	25 C	75 % RH	CY	male	22	10	0.5161	0.0364604	Left	Hindwing	ups	dry	169.915	4.92525	19.0959	0.0072597	NA	NA	NA	NA	154	0.0916549
990	moore	25-07-02	Ghana	3	moore_7.2	Temp_2	25 C	75 % RH	CY	male	22	10	0.46	0.0350884	Left	Forewing	ups	dry	137.191	1.14045	3.8976	0.0110257	NA	NA	NA	NA	154	0.104875
1786	moore	25-07-02	Ghana	3	moore_7.2	Temp_2	25 C	75 % RH	CY	male	22	10	0.46	0.0350884	Right	Hindwing	uns	dry	140.307	3.9657	16.014	0.011105	NA	NA	NA	NA	154	0.107058
109	moore	25-07-03	Ghana	3	moore_7.2	Temp_2	25 C	75 % RH	CY	male	23	10	0.5334	0.0352606	Right	Forewing	uns	dry	144.452	0.72885	2.71165	0.0100042	NA	NA	NA	NA	154	0.102029
1772	moore	25-07-03	Ghana	3	moore_7.2	Temp_2	25 C	75 % RH	CY	male	23	10	0.5334	0.0352606	Right	Hindwing	uns	dry	152.555	4.9986	20.054	0.00871993	NA	NA	NA	NA	154	0.11013
111	moore	25-07-04	Ghana	3	moore_7.2	Temp_2	25 C	75 % RH	CY	female	23	10	0.5623	0.0358863	Left	Forewing	ups	dry	166.4	1.2497	5.1474	0.00868149	NA	NA	NA	NA	154	0.0980843
1689	moore	25-07-04	Ghana	3	moore_7.2	Temp_2	25 C	75 % RH	CY	female	23	10	0.5623	0.0358863	Right	Hindwing	uns	dry	173.407	4.33275	18.1261	0.0127342	NA	NA	NA	NA	154	0.115734
1001	moore	25-07-05	Ghana	3	moore_7.2	Temp_2	25 C	75 % RH	CY	female	24	10	0.5615	0.0343747	Left	Forewing	ups	dry	171.608	1.2156	5.1061	0.0070164	NA	NA	NA	NA	154	0.0821915
1729	moore	25-07-05	Ghana	3	moore_7.2	Temp_2	25 C	75 % RH	CY	female	24	10	0.5615	0.0343747	Right	Hindwing	uns	dry	168.726	5.9014	21.914	0.0105546	NA	NA	NA	NA	154	0.100178
1005	moore	25-07-06	Ghana	3	moore_7.2	Temp_2	25 C	75 % RH	CY	female	24	9	0.4786	0.0325921	Right	Forewing	uns	dry	144.55	0.97435	3.53995	0.00906392	NA	NA	NA	NA	154	0.0894117
1699	moore	25-07-06	Ghana	3	moore_7.2	Temp_2	25 C	75 % RH	CY	female	24	9	0.4786	0.0325921	Left	Hindwing	ups	dry	142.149	4.11715	16.2296	0.0176684	NA	NA	NA	NA	154	0.140815
1015	moore	25-07-07	Ghana	3	moore_7.2	Temp_2	25 C	75 % RH	CY	female	25	9	0.5358	0.0324883	Right	Forewing	uns	dry	166.69	1.29205	5.3315	0.00825945	NA	NA	NA	NA	154	0.0909612
1744	moore	25-07-07	Ghana	3	moore_7.2	Temp_2	25 C	75 % RH	CY	female	25	9	0.5358	0.0324883	Left	Hindwing	ups	dry	162.972	5.08105	20.7694	0.0116935	NA	NA	NA	NA	154	0.110632
23	moore	25-07-08	Ghana	3	moore_7.2	Temp_2	25 C	75 % RH	CY	male	25	10	0.5882	0.0335147	Left	Forewing	ups	dry	167.397	0.93315	3.7784	0.00634029	NA	NA	NA	NA	154	0.0817682
1795	moore	25-07-08	Ghana	3	moore_7.2	Temp_2	25 C	75 % RH	CY	male	25	10	0.5882	0.0335147	Right	Hindwing	uns	dry	183.236	4.6	20.9891	NA	NA	NA	NA	NA	154	NA
79	moore	25-07-09	Ghana	3	moore_7.2	Temp_2	25 C	75 % RH	CY	male	26	10	0.4181	0.0287599	Left	Forewing	ups	dry	127.85	0.8395	3.21485	0.00600056	NA	NA	NA	NA	154	0.0813259
1855	moore	25-07-09	Ghana	3	moore_7.2	Temp_2	25 C	75 % RH	CY	male	26	10	0.4181	0.0287599	Right	Hindwing	uns	dry	129.862	4.1059	15.8969	0.00664625	NA	NA	NA	NA	154	0.0780112
69	moore	25-08-01	Ghana	3	moore_8.2	Temp_2	25 C	75 % RH	CY	female	22	8	0.6322	0.0390118	Right	Forewing	uns	dry	186.144	1.25625	4.9831	0.00497172	NA	NA	NA	NA	154	0.0692552
1694	moore	25-08-01	Ghana	3	moore_8.2	Temp_2	25 C	75 % RH	CY	female	22	8	0.6322	0.0390118	Right	Hindwing	uns	dry	174.423	5.21135	18.6195	0.0119788	NA	NA	NA	NA	154	0.113329
61	moore	25-08-02	Ghana	3	moore_8.2	Temp_2	25 C	75 % RH	CY	female	23	9	0.4977	0.0344557	Right	Forewing	uns	dry	154.109	1.0109	4.57045	0.00879098	NA	NA	NA	NA	154	0.0924528
1680	moore	25-08-02	Ghana	3	moore_8.2	Temp_2	25 C	75 % RH	CY	female	23	9	0.4977	0.0344557	Right	Hindwing	uns	dry	154.975	5.45205	19.8455	0.0178863	NA	NA	NA	NA	154	0.136154
62	moore	25-08-03	Ghana	3	moore_8.2	Temp_2	25 C	75 % RH	CY	female	23	10	0.5952	0.0365729	Left	Forewing	ups	dry	173.281	1.515	5.96165	0.00609638	NA	NA	NA	NA	154	0.077871
1700	moore	25-08-03	Ghana	3	moore_8.2	Temp_2	25 C	75 % RH	CY	female	23	10	0.5952	0.0365729	Right	Hindwing	uns	dry	169.086	5.76695	22.9924	0.0132092	NA	NA	NA	NA	154	0.112222
107	moore	25-08-04	Ghana	3	moore_8.2	Temp_2	25 C	75 % RH	CY	female	24	9	0.5017	0.0331083	Right	Forewing	uns	dry	162.357	1.1636	5.2477	0.00625708	NA	NA	NA	NA	154	0.0775936
1789	moore	25-08-04	Ghana	3	moore_8.2	Temp_2	25 C	75 % RH	CY	female	24	9	0.5017	0.0331083	Left	Hindwing	ups	dry	164.607	5.6916	20.7016	0.00855402	NA	NA	NA	NA	154	0.0914328
29	moore	25-08-05	Ghana	3	moore_8.2	Temp_2	25 C	75 % RH	CY	female	24	10	0.5582	0.0343072	Left	Forewing	ups	dry	168.965	1.481	5.66855	0.00584432	NA	NA	NA	NA	154	NA
1684	moore	25-08-05	Ghana	3	moore_8.2	Temp_2	25 C	75 % RH	CY	female	24	10	0.5582	0.0343072	Right	Hindwing	uns	dry	171.753	4.4298	19.1678	0.0125721	NA	NA	NA	NA	154	0.116919
24	moore	25-08-07	Ghana	3	moore_8.2	Temp_2	25 C	75 % RH	CY	female	25	10	0.6238	0.0341776	Right	Forewing	uns	dry	182.928	1.3297	5.9707	0.0055871	NA	NA	NA	NA	154	0.0752153
1743	moore	25-08-07	Ghana	3	moore_8.2	Temp_2	25 C	75 % RH	CY	female	25	10	0.6238	0.0341776	Right	Hindwing	uns	dry	181.684	4.80755	19.7566	0.00905357	NA	NA	NA	NA	154	NA
25	moore	25-08-08	Ghana	3	moore_8.2	Temp_2	25 C	75 % RH	CY	female	25	9	0.5574	0.0329192	Right	Forewing	uns	dry	156.461	1.5451	5.8633	0.0069445	NA	NA	NA	NA	154	0.0836896
1720	moore	25-08-08	Ghana	3	moore_8.2	Temp_2	25 C	75 % RH	CY	female	25	9	0.5574	0.0329192	Left	Hindwing	ups	dry	159.157	5.59275	22.1374	0.0113091	NA	NA	NA	NA	154	0.10836
26	moore	25-08-09	Ghana	3	moore_8.2	Temp_2	25 C	75 % RH	CY	male	25	10	0.6078	0.0338829	Left	Forewing	ups	dry	174.667	1.41395	5.78295	0.00447853	NA	NA	NA	NA	154	0.0643988
1710	moore	25-08-09	Ghana	3	moore_8.2	Temp_2	25 C	75 % RH	CY	male	25	10	0.6078	0.0338829	Right	Hindwing	uns	dry	176.361	4.41135	21.524	0.0103503	NA	NA	NA	NA	154	0.103217
15	moore	25-08-10	Ghana	3	moore_8.2	Temp_2	25 C	75 % RH	CY	female	27	10	0.509	0.0295716	Right	Forewing	uns	dry	145.959	1.45375	5.5833	0.00478426	NA	NA	NA	NA	154	0.0660396
1834	moore	25-08-10	Ghana	3	moore_8.2	Temp_2	25 C	75 % RH	CY	female	27	10	0.509	0.0295716	Right	Hindwing	uns	dry	165.911	4.63945	18.344	0.0046272	NA	NA	NA	NA	154	0.0770256
1008	moore	25-09-01	Ghana	3	moore_9.2	Temp_2	25 C	75 % RH	CY	female	22	10	0.5106	0.0363305	Left	Forewing	ups	dry	162.142	1.47195	5.8762	0.00760777	NA	NA	NA	NA	154	0.0900781
1758	moore	25-09-01	Ghana	3	moore_9.2	Temp_2	25 C	75 % RH	CY	female	22	10	0.5106	0.0363305	Left	Hindwing	ups	dry	174.014	4.9283	20.3946	0.0105802	NA	NA	NA	NA	154	0.101687
1022	moore	25-09-02	Ghana	3	moore_9.2	Temp_2	25 C	75 % RH	CY	female	22	10	0.5973	0.0382803	Left	Forewing	ups	dry	159.573	1.4555	5.64185	0.00862112	NA	NA	NA	NA	154	0.0973302
1685	moore	25-09-02	Ghana	3	moore_9.2	Temp_2	25 C	75 % RH	CY	female	22	10	0.5973	0.0382803	Left	Hindwing	ups	dry	171.06	6.143	24.4054	0.0143468	NA	NA	NA	NA	154	0.122791
37	moore	25-09-03	Ghana	3	moore_9.2	Temp_2	25 C	75 % RH	CY	male	23	10	0.5756	0.036167	Right	Forewing	uns	dry	158.985	0.98275	3.28805	0.00591692	NA	NA	NA	NA	154	0.0803006
1748	moore	25-09-03	Ghana	3	moore_9.2	Temp_2	25 C	75 % RH	CY	male	23	10	0.5756	0.036167	Right	Hindwing	uns	dry	167.349	5.2667	19.8697	0.00989418	NA	NA	NA	NA	154	0.103038
31	moore	25-09-04	Ghana	3	moore_9.2	Temp_2	25 C	75 % RH	CY	male	24	10	0.4446	0.0318013	Left	Forewing	ups	dry	136.476	0.6121	2.3573	0.0074746	NA	NA	NA	NA	154	0.0864558
1770	moore	25-09-04	Ghana	3	moore_9.2	Temp_2	25 C	75 % RH	CY	male	24	10	0.4446	0.0318013	Left	Hindwing	ups	dry	142.543	4.3254	17.9303	0.00810458	NA	NA	NA	NA	154	0.101058
32	moore	25-09-05	Ghana	3	moore_9.2	Temp_2	25 C	75 % RH	CY	male	24	10	0.4482	0.0318869	Left	Forewing	ups	dry	139.538	0.83485	3.0409	0.00981691	NA	NA	NA	NA	154	0.100686
1848	moore	25-09-05	Ghana	3	moore_9.2	Temp_2	25 C	75 % RH	CY	male	24	10	0.4482	0.0318869	Left	Hindwing	ups	dry	136.391	4.80455	17.98	0.00562525	NA	NA	NA	NA	154	0.0750017
27	moore	25-09-07	Ghana	3	moore_9.2	Temp_2	25 C	75 % RH	CY	male	25	9	0.4862	0.0314532	Right	Forewing	uns	dry	137.141	0.88015	3.15165	0.00784432	NA	NA	NA	NA	154	0.0851596
1790	moore	25-09-07	Ghana	3	moore_9.2	Temp_2	25 C	75 % RH	CY	male	25	9	0.4862	0.0314532	Left	Hindwing	ups	dry	135.595	5.0298	18.4839	0.0108287	NA	NA	NA	NA	154	0.10913
983	moore	25-09-08	Ghana	3	moore_9.2	Temp_2	25 C	75 % RH	CY	female	25	10	0.4984	0.0317141	Right	Forewing	uns	dry	156.482	0.8666	3.81625	0.00523067	NA	NA	NA	NA	154	0.0723828
1791	moore	25-09-08	Ghana	3	moore_9.2	Temp_2	25 C	75 % RH	CY	female	25	10	0.4984	0.0317141	Left	Hindwing	ups	dry	159.792	3.84885	16.7604	0.00916225	NA	NA	NA	NA	154	0.0962573
1018	moore	25-10-01	Ghana	3	Temp_10.2	Temp_2	25 C	75 % RH	CY	female	23	10	0.5638	0.0359181	Right	Forewing	uns	dry	174.867	1.30025	5.0889	0.00703345	NA	NA	NA	NA	155	0.0812369
1704	moore	25-10-01	Ghana	3	Temp_10.2	Temp_2	25 C	75 % RH	CY	female	23	10	0.5638	0.0359181	Left	Hindwing	ups	dry	182.123	4.7584	18.1533	0.012027	NA	NA	NA	NA	155	0.116342
34	moore	25-10-02	Ghana	3	Temp_10.2	Temp_2	25 C	75 % RH	CY	male	24	10	0.5368	0.0338631	Left	Forewing	ups	dry	156.888	0.7529	3.06575	0.00443467	NA	NA	NA	NA	155	0.0693407
1821	moore	25-10-02	Ghana	3	Temp_10.2	Temp_2	25 C	75 % RH	CY	male	24	10	0.5368	0.0338631	Right	Hindwing	uns	dry	162.345	4.24455	15.2216	0.00677109	NA	NA	NA	NA	155	0.0818965
562	moore	25-13-01	Ghana	2	Temp_13.1	Temp_1	25 C	75 % RH	CY	female	22	9	0.5792	0.0378896	Right	Forewing	uns	int	154.434	0.95265	3.65215	0.0155587	NA	NA	NA	NA	104	0.129341
1377	moore	25-13-01	Ghana	2	Temp_13.1	Temp_1	25 C	75 % RH	CY	female	22	9	0.5792	0.0378896	Left	Hindwing	ups	int	162.142	4.2438	16.3788	0.0543959	NA	NA	NA	NA	104	0.234389
884	moore	25-13-02	Ghana	2	Temp_13.1	Temp_1	25 C	75 % RH	CY	male	22	9	0.5793	0.0378918	Right	Forewing	uns	dry	147.957	0.9118	3.0687	0.00275269	NA	NA	NA	NA	104	0.0561064
1906	moore	25-13-02	Ghana	2	Temp_13.1	Temp_1	25 C	75 % RH	CY	male	22	9	0.5793	0.0378918	Left	Hindwing	ups	dry	160.406	3.8092	13.6613	0.00557148	NA	NA	NA	NA	104	0.0746424
661	moore	25-13-03	Ghana	2	Temp_13.1	Temp_1	25 C	75 % RH	CY	male	23	10	0.5109	0.0347577	Left	Forewing	ups	dry	130.377	0.93995	3.4237	0.00879642	NA	NA	NA	NA	104	0.0927115
1835	moore	25-13-03	Ghana	2	Temp_13.1	Temp_1	25 C	75 % RH	CY	male	23	10	0.5109	0.0347577	Left	Hindwing	ups	dry	138.692	4.7746	18.205	0.0089202	NA	NA	NA	NA	104	0.0921782
617	moore	25-13-04	Ghana	2	Temp_13.1	Temp_1	25 C	75 % RH	CY	female	23	8	0.5656	0.0359563	Right	Forewing	uns	int	138.374	0.9016	3.24455	0.00905097	NA	NA	NA	NA	104	0.10562
1678	moore	25-13-04	Ghana	2	Temp_13.1	Temp_1	25 C	75 % RH	CY	female	23	8	0.5656	0.0359563	Right	Hindwing	uns	int	146.851	4.8917	18.6207	0.0181454	NA	NA	NA	NA	104	0.138861
720	moore	25-13-05	Ghana	2	Temp_13.1	Temp_1	25 C	75 % RH	CY	female	23	9	0.5657	0.0359584	Right	Forewing	uns	dry	149.808	1.49735	5.5589	0.00734903	NA	NA	NA	NA	104	0.100728
1718	moore	25-13-05	Ghana	2	Temp_13.1	Temp_1	25 C	75 % RH	CY	female	23	9	0.5657	0.0359584	Left	Hindwing	ups	dry	170.057	4.367	16.9459	0.0103723	NA	NA	NA	NA	104	0.0978313
734	moore	25-13-07	Ghana	2	Temp_13.1	Temp_1	25 C	75 % RH	CY	male	NA	NA	0.5931	NA	Left	Forewing	ups	dry	158.492	0.7715	2.42985	0.00460766	NA	NA	NA	NA	104	0.0683466
1688	moore	25-13-07	Ghana	2	Temp_13.1	Temp_1	25 C	75 % RH	CY	male	NA	NA	0.5931	NA	Right	Hindwing	uns	dry	169.612	5.2526	20.6826	0.0126139	NA	NA	NA	NA	104	0.112711
613	moore	25-13-08	Ghana	2	Temp_13.1	Temp_1	25 C	75 % RH	CY	female	NA	NA	0.5745	NA	Left	Forewing	ups	int	152.787	1.20155	3.9684	0.00951451	NA	NA	NA	NA	104	0.0927811
1638	moore	25-13-08	Ghana	2	Temp_13.1	Temp_1	25 C	75 % RH	CY	female	NA	NA	0.5745	NA	Left	Hindwing	ups	int	160.675	4.15685	16.3179	0.0286082	NA	NA	NA	NA	104	0.177396
819	moore	25-13-09	Ghana	2	Temp_13.1	Temp_1	25 C	75 % RH	CY	male	NA	NA	0.5236	NA	Right	Forewing	uns	dry	139.312	1.10145	3.78195	0.0044851	NA	NA	NA	NA	104	0.0671732
1863	moore	25-13-09	Ghana	2	Temp_13.1	Temp_1	25 C	75 % RH	CY	male	NA	NA	0.5236	NA	Right	Hindwing	uns	dry	152.288	4.3091	17.2759	0.0075578	NA	NA	NA	NA	104	0.0890517
700	moore	25-13-11	Ghana	2	Temp_13.1	Temp_1	25 C	75 % RH	CY	male	NA	NA	0.4936	NA	Left	Forewing	ups	dry	116.475	0.77105	2.77755	0.00730739	NA	NA	NA	NA	104	0.0917718
1724	moore	25-13-11	Ghana	2	Temp_13.1	Temp_1	25 C	75 % RH	CY	male	NA	NA	0.4936	NA	Left	Hindwing	ups	dry	129.503	4.0257	17.4047	0.0153896	NA	NA	NA	NA	104	0.124055
746	moore	25-13-11(2)	Ghana	2	Temp_13.1	Temp_1	25 C	75 % RH	CY	male	NA	NA	NA	NA	Right	Forewing	uns	dry	128.525	0.7535	2.74815	0.00491909	NA	NA	NA	NA	104	0.0715582
1767	moore	25-13-11(2)	Ghana	2	Temp_13.1	Temp_1	25 C	75 % RH	CY	male	NA	NA	NA	NA	Left	Hindwing	ups	dry	141.505	4.24705	16.6101	0.0111289	NA	NA	NA	NA	104	0.110008
915	moore	25-14-02	Ghana	2	Temp_14.1	Temp_1	25 C	75 % RH	CY	male	25	10	0.5085	0.0319269	Left	Forewing	ups	dry	145.219	0.8678	2.76945	0.00318767	NA	NA	NA	NA	103	0.0559976
1909	moore	25-14-02	Ghana	2	Temp_14.1	Temp_1	25 C	75 % RH	CY	male	25	10	0.5085	0.0319269	Right	Hindwing	uns	dry	159.273	4.0548	15.8977	0.00648461	NA	NA	NA	NA	103	0.0807697
714	moore	25-14-03	Ghana	2	Temp_14.1	Temp_1	25 C	75 % RH	CY	male	25	10	0.5184	0.0321328	Left	Forewing	ups	dry	138.668	0.9122	3.47565	0.00659981	NA	NA	NA	NA	103	0.0829472
1830	moore	25-14-03	Ghana	2	Temp_14.1	Temp_1	25 C	75 % RH	CY	male	25	10	0.5184	0.0321328	Left	Hindwing	ups	dry	154.18	3.9478	15.7797	0.00851627	NA	NA	NA	NA	103	0.0882676
652	moore	25-14-04	Ghana	2	Temp_14.1	Temp_1	25 C	75 % RH	CY	male	26	10	0.4829	0.0301749	Right	Forewing	uns	dry	125.625	1.0512	3.50005	0.00798476	NA	NA	NA	NA	103	0.0817777
1831	moore	25-14-04	Ghana	2	Temp_14.1	Temp_1	25 C	75 % RH	CY	male	26	10	0.4829	0.0301749	Left	Hindwing	ups	dry	131.064	4.54375	18.3788	0.00903891	NA	NA	NA	NA	103	0.0956462
682	moore	25-14-05	Ghana	2	Temp_14.1	Temp_1	25 C	75 % RH	CY	male	26	10	0.3953	0.0282273	Left	Forewing	ups	dry	110.083	0.94175	3.14725	0.00890711	NA	NA	NA	NA	103	0.0970395
1698	moore	25-14-05	Ghana	2	Temp_14.1	Temp_1	25 C	75 % RH	CY	male	26	10	0.3953	0.0282273	Left	Hindwing	ups	dry	120.112	4.07095	17.6517	0.0179788	NA	NA	NA	NA	103	0.132754
909	moore	25-14-08	Ghana	2	Temp_14.1	Temp_1	25 C	75 % RH	CY	male	28	10	0.4061	0.0264476	Left	Forewing	ups	dry	112.222	1.10935	3.96215	0.0040588	NA	NA	NA	NA	103	0.0635355
2038	moore	25-14-08	Ghana	2	Temp_14.1	Temp_1	25 C	75 % RH	CY	male	28	10	0.4061	0.0264476	Right	Hindwing	uns	dry	123.603	3.8124	14.4215	0.00513986	NA	NA	NA	NA	103	0.0716928
731	moore	25-14-09	Ghana	2	Temp_14.1	Temp_1	25 C	75 % RH	CY	male	NA	NA	NA	NA	Left	Forewing	ups	dry	117.273	0.82195	2.82175	0.00662936	NA	NA	NA	NA	103	0.0845803
1858	moore	25-14-09	Ghana	2	Temp_14.1	Temp_1	25 C	75 % RH	CY	male	NA	NA	NA	NA	Left	Hindwing	ups	dry	79.7816	3.392	14.7966	0.0159206	NA	NA	NA	NA	103	0.138244
726	moore	25-14-10	Ghana	2	Temp_14.1	Temp_1	25 C	75 % RH	CY	female	NA	NA	NA	NA	Right	Forewing	uns	dry	127.304	0.86225	3.39765	0.00535942	NA	NA	NA	NA	103	0.0752954
1754	moore	25-14-10	Ghana	2	Temp_14.1	Temp_1	25 C	75 % RH	CY	female	NA	NA	NA	NA	Left	Hindwing	ups	dry	123.018	4.2823	17.4027	0.0145561	NA	NA	NA	NA	103	0.124535
641	moore	25-14-11	Ghana	2	Temp_14.1	Temp_1	25 C	75 % RH	CY	NA	30	9	0.3943	0.024443	Left	Forewing	ups	dry	132.019	0.98265	3.45755	0.00773215	NA	NA	NA	NA	103	0.0893202
1681	moore	25-14-11	Ghana	2	Temp_14.1	Temp_1	25 C	75 % RH	CY	NA	30	9	0.3943	0.024443	Right	Hindwing	uns	dry	138.777	3.80895	14.2082	0.0169015	NA	NA	NA	NA	103	0.128196
831	moore	25-14-13	Ghana	2	Temp_14.1	Temp_1	25 C	75 % RH	CY	female	31	10	0.4867	0.0253742	Left	Forewing	ups	dry	145.846	1.18625	4.5786	0.00359279	NA	NA	NA	NA	103	0.0613099
1803	moore	25-14-13	Ghana	2	Temp_14.1	Temp_1	25 C	75 % RH	CY	female	31	10	0.4867	0.0253742	Left	Hindwing	ups	dry	159.567	4.92475	17.441	0.00825586	NA	NA	NA	NA	103	0.0945314
601	moore	25-14-14	Ghana	2	Temp_14.1	Temp_1	25 C	75 % RH	CY	male	37	9	0.417	0.0201919	Left	Forewing	ups	int	111.806	0.73075	2.7749	0.0142741	NA	NA	NA	NA	103	0.120783
1660	moore	25-14-14	Ghana	2	Temp_14.1	Temp_1	25 C	75 % RH	CY	male	37	9	0.417	0.0201919	Right	Hindwing	uns	int	117.45	4.0203	15.8969	0.0297536	NA	NA	NA	NA	103	0.181077
642	moore	25-15-01	Ghana	2	Temp_15.1	Temp_1	25 C	75 % RH	CY	female	21	9	0.5678	0.0394317	Right	Forewing	uns	int	151.569	1.088	4.2405	0.00473604	NA	NA	NA	NA	103	0.0773954
1751	moore	25-15-01	Ghana	2	Temp_15.1	Temp_1	25 C	75 % RH	CY	female	21	9	0.5678	0.0394317	Left	Hindwing	ups	int	154.154	3.5178	14.4552	0.0105811	NA	NA	NA	NA	103	0.106044
145	moore	25-15-02	Ghana	2	Temp_15.1	Temp_1	25 C	75 % RH	CY	female	22	8	0.4466	0.0347443	Right	Forewing	uns	wet	121.314	0.56765	2.0464	0.0481239	NA	NA	NA	NA	103	0.222487
1495	moore	25-15-02	Ghana	2	Temp_15.1	Temp_1	25 C	75 % RH	CY	female	22	8	0.4466	0.0347443	Left	Hindwing	ups	wet	122.601	4.08185	14.6403	0.0538957	NA	NA	NA	NA	103	0.232816
572	moore	25-15-03	Ghana	2	Temp_15.1	Temp_1	25 C	75 % RH	CY	female	22	9	0.4831	0.0356662	Right	Forewing	uns	int	131.383	0.8126	2.86885	0.0162041	NA	NA	NA	NA	103	0.127695
1665	moore	25-15-03	Ghana	2	Temp_15.1	Temp_1	25 C	75 % RH	CY	female	22	9	0.4831	0.0356662	Right	Hindwing	uns	int	132.924	3.9589	15.0442	0.0291332	NA	NA	NA	NA	103	0.176409
875	moore	25-15-04	Ghana	2	Temp_15.1	Temp_1	25 C	75 % RH	CY	female	24	9	0.5662	0.0344703	Left	Forewing	ups	dry	162.274	1.20565	4.58455	0.00390242	NA	NA	NA	NA	103	0.0637032
1959	moore	25-15-04	Ghana	2	Temp_15.1	Temp_1	25 C	75 % RH	CY	female	24	9	0.5662	0.0344703	Right	Hindwing	uns	dry	172.821	4.60675	17.2722	0.00522791	NA	NA	NA	NA	103	0.0748559
456	moore	25-15-05	Ghana	2	Temp_15.1	Temp_1	25 C	75 % RH	CY	male	24	7	0.4814	0.0326556	Right	Forewing	uns	wet	128.431	0.53595	1.6207	0.0253139	NA	NA	NA	NA	103	0.158126
1381	moore	25-15-05	Ghana	2	Temp_15.1	Temp_1	25 C	75 % RH	CY	male	24	7	0.4814	0.0326556	Right	Hindwing	uns	wet	129.903	3.90255	14.5003	0.0560887	NA	NA	NA	NA	103	0.246722
723	moore	25-15-06	Ghana	2	Temp_15.1	Temp_1	25 C	75 % RH	CY	male	23	9	0.5262	0.0351012	Right	Forewing	uns	dry	142.126	1.04435	3.5005	0.00564955	NA	NA	NA	NA	103	0.0769866
1731	moore	25-15-06	Ghana	2	Temp_15.1	Temp_1	25 C	75 % RH	CY	male	23	9	0.5262	0.0351012	Right	Hindwing	uns	dry	154.548	4.9573	17.8283	0.0113325	NA	NA	NA	NA	103	0.109084
785	moore	25-15-07	Ghana	2	Temp_15.1	Temp_1	25 C	75 % RH	CY	male	24	9	0.5104	0.0332986	Left	Forewing	ups	dry	136.689	0.9457	2.95915	0.00503664	NA	NA	NA	NA	103	0.0736661
1914	moore	25-15-07	Ghana	2	Temp_15.1	Temp_1	25 C	75 % RH	CY	male	24	9	0.5104	0.0332986	Right	Hindwing	uns	dry	152.311	4.3582	17.1211	0.00583546	NA	NA	NA	NA	103	0.0759337
733	moore	25-15-08.5	Ghana	2	Temp_15.1	Temp_1	25 C	75 % RH	CY	female	23	9	0.5105	0.0347486	Left	Forewing	ups	dry	157.088	1.39475	5.55315	0.0046839	NA	NA	NA	NA	103	0.0679414
1948	moore	25-15-08.5	Ghana	2	Temp_15.1	Temp_1	25 C	75 % RH	CY	female	23	9	0.5105	0.0347486	Right	Hindwing	uns	dry	165.141	4.61735	18.4584	0.00572582	NA	NA	NA	NA	103	0.0763913
769	moore	25-15-09	Ghana	2	Temp_15.1	Temp_1	25 C	75 % RH	CY	female	NA	NA	NA	NA	Right	Forewing	uns	dry	160.903	1.31995	4.70415	0.00420174	NA	NA	NA	NA	103	0.0663165
1764	moore	25-15-09	Ghana	2	Temp_15.1	Temp_1	25 C	75 % RH	CY	female	NA	NA	NA	NA	Left	Hindwing	ups	dry	169.87	4.50645	17.9877	0.00946183	NA	NA	NA	NA	103	0.102963
744	moore	25-15-10	Ghana	2	Temp_15.1	Temp_1	25 C	75 % RH	CY	female	24	10	0.5812	0.0347721	Right	Forewing	uns	dry	163.142	1.26235	4.731	0.00431493	NA	NA	NA	NA	103	0.0678206
1793	moore	25-15-10	Ghana	2	Temp_15.1	Temp_1	25 C	75 % RH	CY	female	24	10	0.5812	0.0347721	Right	Hindwing	uns	dry	163.345	5.36925	19.9482	0.00760547	NA	NA	NA	NA	103	0.0906627
820	moore	25-15-11	Ghana	2	Temp_15.1	Temp_1	25 C	75 % RH	CY	male	24	10	0.6443	0.0359875	Right	Forewing	uns	dry	149.542	1.15005	3.87275	0.00440862	NA	NA	NA	NA	103	0.0706986
1840	moore	25-15-11	Ghana	2	Temp_15.1	Temp_1	25 C	75 % RH	CY	male	24	10	0.6443	0.0359875	Left	Hindwing	ups	dry	166.17	4.98065	18.4281	0.00782492	NA	NA	NA	NA	103	0.0873345
925	moore	25-15-12	Ghana	2	Temp_15.1	Temp_1	25 C	75 % RH	CY	male	24	10	0.5224	0.0335575	Left	Forewing	ups	dry	134.202	0.8164	2.8536	0.00360305	NA	NA	NA	NA	103	0.0617786
1998	moore	25-15-12	Ghana	2	Temp_15.1	Temp_1	25 C	75 % RH	CY	male	24	10	0.5224	0.0335575	Left	Hindwing	ups	dry	143.508	4.03125	16.5019	0.00487799	NA	NA	NA	NA	103	0.0720432
690	moore	25-15-13	Ghana	2	Temp_15.1	Temp_1	25 C	75 % RH	CY	female	NA	NA	0.5426	NA	Left	Forewing	ups	dry	158.266	1.38835	4.9869	0.00602971	NA	NA	NA	NA	103	0.0811935
1735	moore	25-15-13	Ghana	2	Temp_15.1	Temp_1	25 C	75 % RH	CY	female	NA	NA	0.5426	NA	Left	Hindwing	ups	dry	166.138	5.9083	20.4875	0.0114964	NA	NA	NA	NA	103	0.108289
659	moore	25-15-14	Ghana	2	Temp_15.1	Temp_1	25 C	75 % RH	CY	male	27	8	0.5038	0.0294706	Right	Forewing	uns	dry	134.956	0.9053	3.44025	0.00692977	NA	NA	NA	NA	103	0.0838582
1825	moore	25-15-14	Ghana	2	Temp_15.1	Temp_1	25 C	75 % RH	CY	male	27	8	0.5038	0.0294706	Right	Hindwing	uns	dry	143.36	4.95425	19.1309	0.00845812	NA	NA	NA	NA	103	0.098114
151	moore	25-24-01	Ghana	2	Temp_24.1	Temp_1	25 C	75 % RH	CY	female	22	8	0.3701	0.032635	Left	Forewing	ups	wet	119.518	0.097486	0.9669	0.0460769	NA	NA	NA	NA	105	0.209539
1186	moore	25-24-01	Ghana	2	Temp_24.1	Temp_1	25 C	75 % RH	CY	female	22	8	0.3701	0.032635	Right	Hindwing	uns	wet	105.231	3.21375	11.6371	0.0936458	NA	NA	NA	NA	105	0.314407
639	moore	25-24-02	Ghana	2	Temp_24.1	Temp_1	25 C	75 % RH	CY	male	NA	NA	0.4455	NA	Left	Forewing	ups	dry	124.91	0.5712	2.0226	0.00883696	NA	NA	NA	NA	105	0.092601
1696	moore	25-24-02	Ghana	2	Temp_24.1	Temp_1	25 C	75 % RH	CY	male	NA	NA	0.4455	NA	Left	Hindwing	ups	dry	130.71	3.86625	14.2859	0.0158475	NA	NA	NA	NA	105	0.12704
663	moore	25-24-03	Ghana	2	Temp_24.1	Temp_1	25 C	75 % RH	CY	male	24	10	0.5554	0.0342497	Left	Forewing	ups	dry	152.478	0.687	2.2009	0.00664252	NA	NA	NA	NA	105	0.083709
1784	moore	25-24-03	Ghana	2	Temp_24.1	Temp_1	25 C	75 % RH	CY	male	24	10	0.5554	0.0342497	Left	Hindwing	ups	dry	161.806	4.2432	15.7373	0.0090993	NA	NA	NA	NA	105	0.097461
686	moore	25-24-05	Ghana	2	Temp_24.1	Temp_1	25 C	75 % RH	CY	male	24	10	0.3894	0.0304266	Left	Forewing	ups	dry	113.601	0.90365	2.8777	0.00667079	NA	NA	NA	NA	105	0.088585
1701	moore	25-24-05	Ghana	2	Temp_24.1	Temp_1	25 C	75 % RH	CY	male	24	10	0.3894	0.0304266	Left	Hindwing	ups	dry	116.093	3.95455	15.3187	0.014212	NA	NA	NA	NA	105	0.127465
717	moore	25-24-06	Ghana	2	Temp_24.1	Temp_1	25 C	75 % RH	CY	male	24	10	0.4404	0.0317009	Left	Forewing	ups	dry	110.467	0.7739	3.0122	0.00726082	NA	NA	NA	NA	105	0.0863414
1899	moore	25-24-06	Ghana	2	Temp_24.1	Temp_1	25 C	75 % RH	CY	male	24	10	0.4404	0.0317009	Left	Hindwing	ups	dry	127.934	3.4849	14.358	0.00802364	NA	NA	NA	NA	105	0.0895748
727	moore	25-24-07	Ghana	2	Temp_24.1	Temp_1	25 C	75 % RH	CY	female	NA	NA	NA	NA	Right	Forewing	uns	dry	131.521	1.098	3.8864	0.00680477	NA	NA	NA	NA	105	0.0859384
1690	moore	25-24-07	Ghana	2	Temp_24.1	Temp_1	25 C	75 % RH	CY	female	NA	NA	NA	NA	Left	Hindwing	ups	dry	133.873	4.13455	14.9677	0.0156919	NA	NA	NA	NA	105	0.126015
796	moore	25-24-08	Ghana	2	Temp_24.1	Temp_1	25 C	75 % RH	CY	male	NA	NA	NA	NA	Left	Forewing	ups	dry	142.715	0.8782	3.2454	0.00427456	NA	NA	NA	NA	105	0.0681605
1833	moore	25-24-08	Ghana	2	Temp_24.1	Temp_1	25 C	75 % RH	CY	male	NA	NA	NA	NA	Left	Hindwing	ups	dry	143.973	4.69845	16.7484	0.00926202	NA	NA	NA	NA	105	0.0956069
635	moore	25-24-09	Ghana	2	Temp_24.1	Temp_1	25 C	75 % RH	CY	female	28	9	0.4122	0.0265794	Right	Forewing	uns	int	134.767	0.7621	2.92405	0.00793611	NA	NA	NA	NA	105	0.0876549
1666	moore	25-24-09	Ghana	2	Temp_24.1	Temp_1	25 C	75 % RH	CY	female	28	9	0.4122	0.0265794	Left	Hindwing	ups	int	138.481	3.5266	12.3575	0.0260513	NA	NA	NA	NA	105	0.163154
863	moore	25-24-10	Ghana	2	Temp_24.1	Temp_1	25 C	75 % RH	CY	male	28	10	0.3986	0.0262838	Left	Forewing	ups	dry	118.576	1.0178	3.4948	0.00366735	NA	NA	NA	NA	105	0.0630656
2064	moore	25-24-10	Ghana	2	Temp_24.1	Temp_1	25 C	75 % RH	CY	male	28	10	0.3986	0.0262838	Left	Hindwing	ups	dry	121.776	3.6229	13.1362	0.00321194	NA	NA	NA	NA	105	0.0557198
707	moore	25-24-11	Ghana	2	Temp_24.1	Temp_1	25 C	75 % RH	CY	male	28	10	0.3623	0.0254604	Left	Forewing	ups	dry	112.379	0.76195	2.85615	0.00792608	NA	NA	NA	NA	105	0.0928101
1813	moore	25-24-11	Ghana	2	Temp_24.1	Temp_1	25 C	75 % RH	CY	male	28	10	0.3623	0.0254604	Left	Hindwing	ups	dry	119.904	3.5156	14.4011	0.0103131	NA	NA	NA	NA	105	0.104812
764	moore	25-24-13	Ghana	2	Temp_24.1	Temp_1	25 C	75 % RH	CY	female	30	10	0.3798	0.0241396	Right	Forewing	uns	int	121.758	0.89405	3.35775	0.0053914	NA	NA	NA	NA	105	0.0709349
1695	moore	25-24-13	Ghana	2	Temp_24.1	Temp_1	25 C	75 % RH	CY	female	30	10	0.3798	0.0241396	Right	Hindwing	uns	int	124.216	3.1241	12.3816	0.0168329	NA	NA	NA	NA	105	0.131128
580	moore	25-24-14	Ghana	2	Temp_24.1	Temp_1	25 C	75 % RH	CY	female	30	10	0.357	0.0236466	Left	Forewing	ups	int	112.966	1.00025	4.0575	0.0139516	NA	NA	NA	NA	105	0.119884
1661	moore	25-24-14	Ghana	2	Temp_24.1	Temp_1	25 C	75 % RH	CY	female	30	10	0.357	0.0236466	Right	Hindwing	uns	int	113.17	3.7926	14.2503	0.0352922	NA	NA	NA	NA	105	0.187862
912	moore	25-24-15	Ghana	2	Temp_24.1	Temp_1	25 C	75 % RH	CY	female	32	10	0.348	0.0219808	Left	Forewing	ups	dry	106.966	0.95945	3.7667	0.00475592	NA	NA	NA	NA	105	0.0629596
1893	moore	25-24-15	Ghana	2	Temp_24.1	Temp_1	25 C	75 % RH	CY	female	32	10	0.348	0.0219808	Right	Hindwing	uns	dry	113.444	3.2543	12.1381	0.00939303	NA	NA	NA	NA	105	0.104089
515	moore	25-24-16	Ghana	2	Temp_24.1	Temp_1	25 C	75 % RH	CY	female	33	9	0.4676	0.0235204	Left	Forewing	ups	wet	152.161	1.06365	3.80815	0.0174073	NA	NA	NA	NA	105	0.133326
1378	moore	25-24-16	Ghana	2	Temp_24.1	Temp_1	25 C	75 % RH	CY	female	33	9	0.4676	0.0235204	Right	Hindwing	uns	wet	154.77	4.6283	18.598	0.0527857	NA	NA	NA	NA	105	0.234451
736	moore	25-24-17	Ghana	2	Temp_24.1	Temp_1	25 C	75 % RH	CY	male	34	9	0.5758	0.0244687	Left	Forewing	ups	dry	152.369	1.19635	4.986	0.00593778	NA	NA	NA	NA	105	0.0758532
1708	moore	25-24-17	Ghana	2	Temp_24.1	Temp_1	25 C	75 % RH	CY	male	34	9	0.5758	0.0244687	Left	Hindwing	ups	dry	172.042	4.7607	19.5333	0.0126199	NA	NA	NA	NA	105	0.111542
657	moore	25-28-01	Ghana	2	Temp_28.1	Temp_1	25 C	75 % RH	CY	female	NA	NA	NA	NA	Left	Forewing	ups	dry	171.463	1.38875	5.16515	0.00612368	NA	NA	NA	NA	107	0.082192
1774	moore	25-28-01	Ghana	2	Temp_28.1	Temp_1	25 C	75 % RH	CY	female	NA	NA	NA	NA	Left	Hindwing	ups	dry	176.587	5.71795	19.4153	0.0082824	NA	NA	NA	NA	107	0.0942631
745	moore	25-28-04	Ghana	2	Temp_28.1	Temp_1	25 C	75 % RH	CY	female	21	10	0.4054	0.0352432	Left	Forewing	ups	dry	132.39	0.91425	3.0136	0.00566572	NA	NA	NA	NA	107	0.0786943
1773	moore	25-28-04	Ghana	2	Temp_28.1	Temp_1	25 C	75 % RH	CY	female	21	10	0.4054	0.0352432	Left	Hindwing	ups	dry	138.993	3.96355	14.5018	0.0111033	NA	NA	NA	NA	107	0.101657
772	moore	25-28-05	Ghana	2	Temp_28.1	Temp_1	25 C	75 % RH	CY	male	NA	NA	NA	NA	Right	Forewing	uns	dry	122.888	0.93365	3.10615	0.00502421	NA	NA	NA	NA	107	0.0730942
1812	moore	25-28-05	Ghana	2	Temp_28.1	Temp_1	25 C	75 % RH	CY	male	NA	NA	NA	NA	Right	Hindwing	uns	dry	129.963	3.75585	13.7563	0.00993208	NA	NA	NA	NA	107	0.0966742
683	moore	25-28-06	Ghana	2	Temp_28.1	Temp_1	25 C	75 % RH	CY	male	NA	NA	NA	NA	Left	Forewing	ups	dry	148.644	0.9036	3.48725	0.00506993	NA	NA	NA	NA	107	0.075139
1913	moore	25-28-06	Ghana	2	Temp_28.1	Temp_1	25 C	75 % RH	CY	male	NA	NA	NA	NA	Left	Hindwing	ups	dry	155.547	5.0759	19.3413	0.00585514	NA	NA	NA	NA	107	0.0808129
685	moore	25-28-07	Ghana	2	Temp_28.1	Temp_1	25 C	75 % RH	CY	male	NA	NA	NA	NA	Right	Forewing	uns	dry	134.559	0.76275	2.7052	0.0059592	NA	NA	NA	NA	107	0.0793955
1815	moore	25-28-07	Ghana	2	Temp_28.1	Temp_1	25 C	75 % RH	CY	male	NA	NA	NA	NA	Right	Hindwing	uns	dry	137.01	3.85785	15.6878	0.00898635	NA	NA	NA	NA	107	0.0976212
824	moore	25-28-08	Ghana	2	Temp_28.1	Temp_1	25 C	75 % RH	CY	male	NA	NA	NA	NA	Left	Forewing	ups	dry	143.706	0.9622	3.5164	0.00382359	NA	NA	NA	NA	107	0.0602336
1801	moore	25-28-08	Ghana	2	Temp_28.1	Temp_1	25 C	75 % RH	CY	male	NA	NA	NA	NA	Right	Hindwing	uns	dry	157.022	4.24775	16.7024	0.00819651	NA	NA	NA	NA	107	0.0930079
623	moore	25-28-09	Ghana	2	Temp_28.1	Temp_1	25 C	75 % RH	CY	male	NA	NA	NA	NA	Right	Forewing	uns	dry	123.95	0.9608	3.65945	0.0110779	NA	NA	NA	NA	107	0.106142
1916	moore	25-28-09	Ghana	2	Temp_28.1	Temp_1	25 C	75 % RH	CY	male	NA	NA	NA	NA	Left	Hindwing	ups	dry	121.195	4.08415	16.8842	0.00907435	NA	NA	NA	NA	107	0.0956915
622	moore	25-28-10	Ghana	2	Temp_28.1	Temp_1	25 C	75 % RH	CY	female	NA	NA	NA	NA	Right	Forewing	uns	int	163.348	1.19005	4.669	0.00822714	NA	NA	NA	NA	107	0.0917775
1676	moore	25-28-10	Ghana	2	Temp_28.1	Temp_1	25 C	75 % RH	CY	female	NA	NA	NA	NA	Left	Hindwing	ups	int	168.567	5.5566	20.8903	0.0153493	NA	NA	NA	NA	107	0.125513
187	moore	25-28-11	Ghana	2	Temp_28.1	Temp_1	25 C	75 % RH	CY	female	26	8	0.3985	0.0283032	Right	Forewing	uns	wet	125.376	0.6393	2.2752	0.0390585	NA	NA	NA	NA	107	0.198369
1115	moore	25-28-11	Ghana	2	Temp_28.1	Temp_1	25 C	75 % RH	CY	female	26	8	0.3985	0.0283032	Right	Hindwing	uns	wet	129.175	3.78535	13.9748	0.0894937	NA	NA	NA	NA	107	0.303229
838	moore	25-28-12	Ghana	2	Temp_28.1	Temp_1	25 C	75 % RH	CY	male	26	10	0.5605	0.0317116	Left	Forewing	ups	dry	144.876	0.90405	2.79035	0.00334527	NA	NA	NA	NA	107	0.0598664
1969	moore	25-28-12	Ghana	2	Temp_28.1	Temp_1	25 C	75 % RH	CY	male	26	10	0.5605	0.0317116	Left	Hindwing	ups	dry	153.888	4.62075	16.5683	0.00533663	NA	NA	NA	NA	107	0.073554
739	moore	25-28-14	Ghana	2	Temp_28.1	Temp_1	25 C	75 % RH	CY	female	34	10	0.5003	0.0233488	Left	Forewing	ups	dry	146.513	1.49895	5.4287	0.00548888	NA	NA	NA	NA	107	0.0788238
1750	moore	25-28-14	Ghana	2	Temp_28.1	Temp_1	25 C	75 % RH	CY	female	34	10	0.5003	0.0233488	Right	Hindwing	uns	dry	149.481	4.29375	17.4979	0.01137	NA	NA	NA	NA	107	0.111269
738	moore	25-28-15	Ghana	2	Temp_28.1	Temp_1	25 C	75 % RH	CY	female	34	10	0.4396	0.0223635	Right	Forewing	uns	dry	137.698	1.15565	4.76095	0.0057479	NA	NA	NA	NA	107	0.0739763
1759	moore	25-28-15	Ghana	2	Temp_28.1	Temp_1	25 C	75 % RH	CY	female	34	10	0.4396	0.0223635	Left	Hindwing	ups	dry	134.711	5.40205	20.6041	0.012831	NA	NA	NA	NA	107	0.113293
621	moore	25-37-01	Ghana	2	moore_37.1	Temp_1	25 C	75 % RH	CY	male	24	10	0.4609	0.0321853	Left	Forewing	ups	dry	131.747	0.6172	1.8659	0.00891474	NA	NA	NA	NA	109	0.10002
1820	moore	25-37-01	Ghana	2	moore_37.1	Temp_1	25 C	75 % RH	CY	male	24	10	0.4609	0.0321853	Right	Hindwing	uns	dry	121.164	3.1833	12.8627	0.00960238	NA	NA	NA	NA	109	0.100678
829	moore	25-37-03	Ghana	2	moore_37.1	Temp_1	25 C	75 % RH	CY	male	25	10	0.5214	0.0321946	Right	Forewing	uns	dry	140.058	0.7525	2.4263	0.0036386	NA	NA	NA	NA	109	0.0586526
1881	moore	25-37-03	Ghana	2	moore_37.1	Temp_1	25 C	75 % RH	CY	male	25	10	0.5214	0.0321946	Right	Hindwing	uns	dry	153.731	3.94295	14.6806	0.00619306	NA	NA	NA	NA	109	0.0789179
626	moore	25-37-04	Ghana	2	moore_37.1	Temp_1	25 C	75 % RH	CY	female	25	9	0.4858	0.0314446	Left	Forewing	ups	dry	140.493	0.93215	3.47485	0.00771297	NA	NA	NA	NA	109	0.0927946
1672	moore	25-37-04	Ghana	2	moore_37.1	Temp_1	25 C	75 % RH	CY	female	25	9	0.4858	0.0314446	Right	Hindwing	uns	dry	146.926	3.84825	13.2735	0.0227389	NA	NA	NA	NA	109	0.144392
684	moore	25-37-05	Ghana	2	moore_37.1	Temp_1	25 C	75 % RH	CY	NA	NA	NA	NA	NA	Right	Forewing	uns	dry	141.247	1.02485	3.9936	0.00609459	NA	NA	NA	NA	109	0.0789502
1828	moore	25-37-05	Ghana	2	moore_37.1	Temp_1	25 C	75 % RH	CY	NA	NA	NA	NA	NA	Left	Hindwing	ups	dry	151.549	4.4356	17.2799	0.00875635	NA	NA	NA	NA	109	0.0940456
879	moore	25-37-06	Ghana	2	moore_37.1	Temp_1	25 C	75 % RH	CY	female	27	9	0.5007	0.02941	Right	Forewing	uns	dry	157.758	1.1496	4.48295	0.00333603	NA	NA	NA	NA	109	0.0595462
1873	moore	25-37-06	Ghana	2	moore_37.1	Temp_1	25 C	75 % RH	CY	female	27	9	0.5007	0.02941	Left	Hindwing	ups	dry	164.874	4.2469	17.0253	0.00624676	NA	NA	NA	NA	109	0.0846269
715	moore	25-37-07	Ghana	2	moore_37.1	Temp_1	25 C	75 % RH	CY	male	27	10	0.4782	0.0289627	Left	Forewing	ups	dry	129.808	0.73485	2.533	0.00534268	NA	NA	NA	NA	109	0.0755429
1819	moore	25-37-07	Ghana	2	moore_37.1	Temp_1	25 C	75 % RH	CY	male	27	10	0.4782	0.0289627	Left	Hindwing	ups	dry	138.426	4.2627	15.2587	0.00873445	NA	NA	NA	NA	109	0.0980892
646	moore	25-37-08	Ghana	2	moore_37.1	Temp_1	25 C	75 % RH	CY	male	27	10	0.4821	0.0290412	Right	Forewing	uns	dry	123.089	0.8121	2.8271	0.00859544	NA	NA	NA	NA	109	0.0945315
2060	moore	25-37-08	Ghana	2	moore_37.1	Temp_1	25 C	75 % RH	CY	male	27	10	0.4821	0.0290412	Left	Hindwing	ups	dry	130.76	3.6343	12.7668	0.00144871	NA	NA	NA	NA	109	0.0520246
528	moore	25-37-09	Ghana	2	moore_37.1	Temp_1	25 C	75 % RH	CY	female	28	9	0.526	0.0288295	Right	Forewing	uns	int	141.768	0.94065	3.3888	0.0205216	NA	NA	NA	NA	109	0.138836
1640	moore	25-37-09	Ghana	2	moore_37.1	Temp_1	25 C	75 % RH	CY	female	28	9	0.526	0.0288295	Right	Hindwing	uns	int	147.722	3.91665	15.3675	0.0355989	NA	NA	NA	NA	109	0.188025
816	moore	25-37-11	Ghana	2	moore_37.1	Temp_1	25 C	75 % RH	CY	male	29	10	0.5143	0.0276275	Left	Forewing	ups	dry	145.231	0.83735	2.8896	0.00473243	NA	NA	NA	NA	109	0.0732326
1936	moore	25-37-11	Ghana	2	moore_37.1	Temp_1	25 C	75 % RH	CY	male	29	10	0.5143	0.0276275	Right	Hindwing	uns	dry	155.416	4.8231	18.6869	0.00642524	NA	NA	NA	NA	109	0.0777376
649	moore	25-37-12	Ghana	2	moore_37.1	Temp_1	25 C	75 % RH	CY	male	29	10	0.5348	0.0279898	Left	Forewing	ups	dry	140.157	0.8152	3.0362	0.00607574	NA	NA	NA	NA	109	0.0783128
1738	moore	25-37-12	Ghana	2	moore_37.1	Temp_1	25 C	75 % RH	CY	male	29	10	0.5348	0.0279898	Left	Hindwing	ups	dry	151.117	5.1928	19.8034	0.0117083	NA	NA	NA	NA	109	0.108831
867	moore	25-37-13	Ghana	2	moore_37.1	Temp_1	25 C	75 % RH	CY	male	31	9	0.3863	0.0234934	Right	Forewing	uns	dry	119.621	0.9477	3.2634	0.00419835	NA	NA	NA	NA	109	0.0621069
1978	moore	25-37-13	Ghana	2	moore_37.1	Temp_1	25 C	75 % RH	CY	male	31	9	0.3863	0.0234934	Right	Hindwing	uns	dry	125.442	4.0032	16.9904	0.00533516	NA	NA	NA	NA	109	0.0693745
855	moore	25-37-14	Ghana	2	moore_37.1	Temp_1	25 C	75 % RH	CY	male	31	10	0.4607	0.0249141	Left	Forewing	ups	dry	136.473	0.9741	3.1802	0.00437732	NA	NA	NA	NA	109	0.0686356
1962	moore	25-37-14	Ghana	2	moore_37.1	Temp_1	25 C	75 % RH	CY	male	31	10	0.4607	0.0249141	Right	Hindwing	uns	dry	148.014	3.6473	13.7704	0.00543922	NA	NA	NA	NA	109	0.0755513
650	moore	25-37-15	Ghana	2	moore_37.1	Temp_1	25 C	75 % RH	CY	female	36	9	0.3227	0.019053	Right	Forewing	uns	int	105.748	0.84825	3.34125	0.0120116	NA	NA	NA	NA	109	0.116427
1693	moore	25-37-15	Ghana	2	moore_37.1	Temp_1	25 C	75 % RH	CY	female	36	9	0.3227	0.019053	Right	Hindwing	uns	int	111.988	3.2542	12.6305	0.0213568	NA	NA	NA	NA	109	0.149175
839	moore	25-41-03	Ghana	2	moore_41.1	Temp_1	25 C	75 % RH	CY	male	NA	NA	NA	NA	Right	Forewing	uns	dry	132.976	0.8824	3.11325	0.00323405	NA	NA	NA	NA	111	0.0606382
1885	moore	25-41-03	Ghana	2	moore_41.1	Temp_1	25 C	75 % RH	CY	male	NA	NA	NA	NA	Left	Hindwing	ups	dry	150.048	3.86235	16.5508	0.00507948	NA	NA	NA	NA	111	0.0789066
813	moore	25-41-04	Ghana	2	moore_41.1	Temp_1	25 C	75 % RH	CY	male	26	10	0.5847	0.0321616	Right	Forewing	uns	dry	144.986	1.05485	3.59795	0.00497754	NA	NA	NA	NA	111	0.0681227
1741	moore	25-41-04	Ghana	2	moore_41.1	Temp_1	25 C	75 % RH	CY	male	26	10	0.5847	0.0321616	Left	Hindwing	ups	dry	163.975	4.2733	18.3835	0.0117467	NA	NA	NA	NA	111	0.110556
662	moore	25-41-06	Ghana	2	moore_41.1	Temp_1	25 C	75 % RH	CY	female	27	10	0.5501	0.0303471	Right	Forewing	uns	int	153.7	1.17255	4.8433	0.006796	NA	NA	NA	NA	111	0.0825066
1691	moore	25-41-06	Ghana	2	moore_41.1	Temp_1	25 C	75 % RH	CY	female	27	10	0.5501	0.0303471	Left	Hindwing	ups	int	160.929	4.9793	19.9487	0.0144593	NA	NA	NA	NA	111	0.12436
763	moore	25-41-07	Ghana	2	moore_41.1	Temp_1	25 C	75 % RH	CY	male	27	10	0.5242	0.0298631	Left	Forewing	ups	dry	142.21	0.7127	2.40685	0.00508573	NA	NA	NA	NA	111	0.0715991
1915	moore	25-41-07	Ghana	2	moore_41.1	Temp_1	25 C	75 % RH	CY	male	27	10	0.5242	0.0298631	Right	Hindwing	uns	dry	151.963	3.6753	14.6006	0.00630722	NA	NA	NA	NA	111	0.0793234
651	moore	25-41-08	Ghana	2	moore_41.1	Temp_1	25 C	75 % RH	CY	female	28	9	0.4109	0.0265514	Right	Forewing	uns	int	130.353	1.0578	3.55005	0.00751239	NA	NA	NA	NA	111	0.0945885
1687	moore	25-41-08	Ghana	2	moore_41.1	Temp_1	25 C	75 % RH	CY	female	28	9	0.4109	0.0265514	Left	Hindwing	ups	int	139.231	3.8876	15.171	0.0186252	NA	NA	NA	NA	111	0.14182
678	moore	25-41-09	Ghana	2	moore_41.1	Temp_1	25 C	75 % RH	CY	female	29	10	0.4561	0.0265433	Right	Forewing	uns	int	143.536	1.20635	4.5397	0.00745704	NA	NA	NA	NA	111	0.0891133
1705	moore	25-41-09	Ghana	2	moore_41.1	Temp_1	25 C	75 % RH	CY	female	29	10	0.4561	0.0265433	Right	Hindwing	uns	int	149.732	4.1008	16.3467	0.0151248	NA	NA	NA	NA	111	0.120781
2907	hallow	1_27_55	India	1	hallow_12	Temp_HR	27 C	55 % RH	CY	NA	17	8	0.4065	0.0435751	Right	Forewing	uns	wet	84.3446	NA	1.1439	0.0493084	NA	NA	NA	NA	NA	0.222055
2908	hallow	1_27_55	India	1	hallow_12	Temp_HR	27 C	55 % RH	CY	NA	17	8	0.4065	0.0435751	Right	Hindwing	uns	wet	87.7032	NA	4.6149	0.0886684	NA	NA	NA	NA	NA	0.297772
2917	hallow	10_27_55	India	1	hallow_12	Temp_HR	27 C	55 % RH	CY	female	24	7	0.3342	0.0289151	Right	Forewing	uns	wet	104.34	NA	1.4263	0.0704351	NA	NA	NA	NA	NA	0.265396
2918	hallow	10_27_55	India	1	hallow_12	Temp_HR	27 C	55 % RH	CY	female	24	7	0.3342	0.0289151	Right	Hindwing	uns	wet	104.002	NA	8.1215	0.159817	NA	NA	NA	NA	NA	0.399771
2927	hallow	11_27_55	India	1	hallow_12	Temp_HR	27 C	55 % RH	CY	male	24	7	0.3492	0.0293414	Right	Forewing	uns	wet	105.873	NA	1.5228	0.0292094	NA	NA	NA	NA	NA	0.170908
2928	hallow	11_27_55	India	1	hallow_12	Temp_HR	27 C	55 % RH	CY	male	24	7	0.3492	0.0293414	Right	Hindwing	uns	wet	109.532	NA	6.3505	0.0670964	NA	NA	NA	NA	NA	0.25903
2937	hallow	12_27_55	India	1	hallow_12	Temp_HR	27 C	55 % RH	CY	female	24	7	0.4839	0.032712	Right	Forewing	uns	NA	NA	NA	NA	NA	NA	NA	NA	NA	NA	NA
2938	hallow	12_27_55	India	1	hallow_12	Temp_HR	27 C	55 % RH	CY	female	24	7	0.4839	0.032712	Right	Hindwing	uns	NA	NA	NA	NA	NA	NA	NA	NA	NA	NA	NA
2947	hallow	13_27_55	India	1	hallow_21	Temp_HR	27 C	55 % RH	CY	female	21	7	0.3912	0.0348268	Right	Forewing	uns	wet	104.237	NA	1.6355	0.0575562	NA	NA	NA	NA	NA	0.239909
2948	hallow	13_27_55	India	1	hallow_21	Temp_HR	27 C	55 % RH	CY	female	21	7	0.3912	0.0348268	Right	Hindwing	uns	wet	101.68	NA	8.1151	0.0871551	NA	NA	NA	NA	NA	0.29522
2957	hallow	14_27_55	India	1	hallow_21	Temp_HR	27 C	55 % RH	CY	female	21	7	0.3343	0.0330491	Right	Forewing	uns	wet	115.839	NA	1.9511	0.0650283	NA	NA	NA	NA	NA	0.255006
2958	hallow	14_27_55	India	1	hallow_21	Temp_HR	27 C	55 % RH	CY	female	21	7	0.3343	0.0330491	Right	Hindwing	uns	wet	114.335	NA	8.0045	0.110419	NA	NA	NA	NA	NA	0.332293
2967	hallow	15_27_55	India	1	hallow_21	Temp_HR	27 C	55 % RH	CY	female	22	8	0.3745	0.0327638	Right	Forewing	uns	dry	137.098	NA	3.0493	0.0104604	NA	NA	NA	NA	NA	0.102276
2968	hallow	15_27_55	India	1	hallow_21	Temp_HR	27 C	55 % RH	CY	female	22	8	0.3745	0.0327638	Right	Hindwing	uns	dry	135.423	NA	11.589	0.0283874	NA	NA	NA	NA	NA	0.168486
2975	hallow	16_27_55	India	1	hallow_10	Temp_HR	27 C	55 % RH	CY	male	25	11	0.3633	0.0285418	Right	Forewing	uns	dry	120.071	NA	4.1195	0.0074198	NA	NA	NA	NA	NA	0.0861383
2976	hallow	16_27_55	India	1	hallow_10	Temp_HR	27 C	55 % RH	CY	male	25	11	0.3633	0.0285418	Right	Hindwing	uns	dry	122.092	NA	14.0181	0.0146832	NA	NA	NA	NA	NA	0.121174
2985	hallow	17_27_55	India	1	hallow_10	Temp_HR	27 C	55 % RH	CY	female	25	7	0.3565	0.0283626	Right	Forewing	uns	dry	117.496	NA	2.677	0.0496339	NA	NA	NA	NA	NA	0.222787
2986	hallow	17_27_55	India	1	hallow_10	Temp_HR	27 C	55 % RH	CY	female	25	7	0.3565	0.0283626	Right	Hindwing	uns	dry	112.06	NA	10.7904	0.128805	NA	NA	NA	NA	NA	0.358894
2995	hallow	18_27_55	India	1	hallow_20	Temp_HR	27 C	55 % RH	CY	male	22	10	0.4143	0.0338856	Right	Forewing	uns	dry	130.365	NA	2.9981	0.0123867	NA	NA	NA	NA	NA	0.111296
2996	hallow	18_27_55	India	1	hallow_20	Temp_HR	27 C	55 % RH	CY	male	22	10	0.4143	0.0338856	Right	Hindwing	uns	dry	141.52	NA	11.6808	0.0121524	NA	NA	NA	NA	NA	0.110238
3005	hallow	19_27_55	India	1	hallow_20	Temp_HR	27 C	55 % RH	CY	female	22	10	0.4366	0.034483	Right	Forewing	uns	wet	141.279	NA	2.1435	0.0400229	NA	NA	NA	NA	NA	0.200057
3006	hallow	19_27_55	India	1	hallow_20	Temp_HR	27 C	55 % RH	CY	female	22	10	0.4366	0.034483	Right	Hindwing	uns	wet	145.886	NA	8.2732	0.00301399	NA	NA	NA	NA	NA	0.0548998
3015	hallow	2_27_55	India	1	hallow_12	Temp_HR	27 C	55 % RH	CY	male	17	8	0.2674	0.037897	Right	Forewing	NA	NA	NA	NA	NA	NA	NA	NA	NA	NA	NA	NA
3016	hallow	2_27_55	India	1	hallow_12	Temp_HR	27 C	55 % RH	CY	male	17	8	0.2674	0.037897	Right	Hindwing	NA	NA	NA	NA	NA	NA	NA	NA	NA	NA	NA	NA
3025	hallow	20_27_55	India	1	hallow_20	Temp_HR	27 C	55 % RH	CY	male	22	10	0.3464	0.031923	Right	Forewing	NA	dry	108.648	NA	1.4592	0.0133743	NA	NA	NA	NA	NA	0.115648
3026	hallow	20_27_55	India	1	hallow_20	Temp_HR	27 C	55 % RH	CY	male	22	10	0.3464	0.031923	Right	Hindwing	NA	dry	116.733	NA	6.2123	0.0121028	NA	NA	NA	NA	NA	0.110013
3035	hallow	21_27_55	India	1	hallow_20	Temp_HR	27 C	55 % RH	CY	female	22	NA	0.3316	0.0314617	Right	Forewing	NA	NA	NA	NA	NA	NA	NA	NA	NA	NA	NA	NA
3036	hallow	21_27_55	India	1	hallow_20	Temp_HR	27 C	55 % RH	CY	female	22	NA	0.3316	0.0314617	Right	Hindwing	NA	NA	NA	NA	NA	NA	NA	NA	NA	NA	NA	NA
3045	hallow	22_27_55	India	1	hallow_20	Temp_HR	27 C	55 % RH	CY	female	22	9	0.4049	0.0336274	Right	Forewing	NA	dry	132.524	NA	3.5706	0.00754202	NA	NA	NA	NA	NA	0.0868448
3046	hallow	22_27_55	India	1	hallow_20	Temp_HR	27 C	55 % RH	CY	female	22	9	0.4049	0.0336274	Right	Hindwing	NA	dry	131.018	NA	15.1562	0.00913539	NA	NA	NA	NA	NA	0.0955793
3055	hallow	23_27_55	India	1	hallow_20	Temp_HR	27 C	55 % RH	CY	female	22	9	0.3793	0.0329032	Right	Forewing	NA	wet	112.518	NA	1.6728	0.0365737	NA	NA	NA	NA	NA	0.191243
3056	hallow	23_27_55	India	1	hallow_20	Temp_HR	27 C	55 % RH	CY	female	22	9	0.3793	0.0329032	Right	Hindwing	NA	wet	111.14	NA	7.8673	0.0833595	NA	NA	NA	NA	NA	0.28872
3063	hallow	24_27_55	India	1	hallow_21	Temp_HR	27 C	55 % RH	CY	female	25	5	0.3433	0.0280082	Right	Forewing	NA	wet	131.049	NA	2.369	0.0717167	NA	NA	NA	NA	NA	0.2678
3064	hallow	24_27_55	India	1	hallow_21	Temp_HR	27 C	55 % RH	CY	female	25	5	0.3433	0.0280082	Right	Hindwing	NA	wet	128.695	NA	7.8232	0.113838	NA	NA	NA	NA	NA	0.337399
3071	hallow	25_27_55	India	1	hallow_21	Temp_HR	27 C	55 % RH	CY	female	25	10	0.4094	0.0297013	Right	Forewing	NA	dry	144.201	NA	2.5152	0.0226531	NA	NA	NA	NA	NA	0.150509
3072	hallow	25_27_55	India	1	hallow_21	Temp_HR	27 C	55 % RH	CY	female	25	10	0.4094	0.0297013	Right	Hindwing	NA	dry	141.732	NA	14.2432	0.0327069	NA	NA	NA	NA	NA	0.180851
3079	hallow	26_27_55	India	1	hallow_21	Temp_HR	27 C	55 % RH	CY	male	25	12	0.4196	0.029946	Right	Forewing	NA	wet	111.349	NA	1.359	0.0495297	NA	NA	NA	NA	NA	0.222553
3080	hallow	26_27_55	India	1	hallow_21	Temp_HR	27 C	55 % RH	CY	male	25	12	0.4196	0.029946	Right	Hindwing	NA	wet	127.734	NA	7.2205	0.056224	NA	NA	NA	NA	NA	0.237116
3087	hallow	27_27_55	India	1	hallow_21	Temp_HR	27 C	55 % RH	CY	male	27	NA	0.3106	0.0250825	Right	Forewing	NA	dry	NA	NA	NA	NA	NA	NA	NA	NA	NA	NA
3088	hallow	27_27_55	India	1	hallow_21	Temp_HR	27 C	55 % RH	CY	male	27	NA	0.3106	0.0250825	Right	Hindwing	NA	dry	NA	NA	NA	NA	NA	NA	NA	NA	NA	NA
3095	hallow	28_27_55	India	1	hallow_21	Temp_HR	27 C	55 % RH	CY	female	27	7	0.4681	0.0287574	Right	Forewing	NA	wet	150.682	NA	4.0058	0.025084	NA	NA	NA	NA	NA	0.158379
3096	hallow	28_27_55	India	1	hallow_21	Temp_HR	27 C	55 % RH	CY	female	27	7	0.4681	0.0287574	Right	Hindwing	NA	wet	172.144	NA	17.479	0	NA	NA	NA	NA	NA	0
3101	hallow	29_27_55	India	1	hallow_20	Temp_HR	27 C	55 % RH	CY	male	24	7	0.3675	0.0298452	Right	Forewing	NA	dry	125.446	NA	2.3652	0.00621143	NA	NA	NA	NA	NA	0.0788126
3102	hallow	29_27_55	India	1	hallow_20	Temp_HR	27 C	55 % RH	CY	male	24	7	0.3675	0.0298452	Right	Hindwing	NA	dry	126.741	NA	10.3984	0.00872647	NA	NA	NA	NA	NA	0.0934156
3109	hallow	3_27_55	India	1	hallow_12	Temp_HR	27 C	55 % RH	CY	female	17	8	0.3959	0.043193	Right	Forewing	NA	wet	NA	NA	NA	NA	NA	NA	NA	NA	NA	NA
3110	hallow	3_27_55	India	1	hallow_12	Temp_HR	27 C	55 % RH	CY	female	17	8	0.3959	0.043193	Right	Hindwing	NA	wet	NA	NA	NA	NA	NA	NA	NA	NA	NA	NA
3117	hallow	30_27_55	India	1	hallow_20	Temp_HR	27 C	55 % RH	CY	female	24	10	0.419	0.0311789	Right	Forewing	NA	dry	147.739	NA	3.4361	0.00940643	NA	NA	NA	NA	NA	0.0969868
3118	hallow	30_27_55	India	1	hallow_20	Temp_HR	27 C	55 % RH	CY	female	24	10	0.419	0.0311789	Right	Hindwing	NA	dry	145.317	NA	12.1517	0.0126399	NA	NA	NA	NA	NA	0.112428
3123	hallow	31_27_55	India	1	hallow_20	Temp_HR	27 C	55 % RH	CY	male	24	7	0.3164	0.0283923	Right	Forewing	NA	wet	NA	NA	NA	NA	NA	NA	NA	NA	NA	NA
3124	hallow	31_27_55	India	1	hallow_20	Temp_HR	27 C	55 % RH	CY	male	24	7	0.3164	0.0283923	Right	Hindwing	NA	wet	NA	NA	NA	NA	NA	NA	NA	NA	NA	NA
3129	hallow	32_27_55	India	1	hallow_20	Temp_HR	27 C	55 % RH	CY	male	24	NA	0.3834	0.0302696	Right	Forewing	NA	NA	NA	NA	NA	NA	NA	NA	NA	NA	NA	NA
3130	hallow	32_27_55	India	1	hallow_20	Temp_HR	27 C	55 % RH	CY	male	24	NA	0.3834	0.0302696	Right	Hindwing	NA	NA	NA	NA	NA	NA	NA	NA	NA	NA	NA	NA
3135	hallow	33_27_55	India	1	hallow_20	Temp_HR	27 C	55 % RH	CY	female	24	NA	0.3122	0.0282661	Right	Forewing	NA	NA	NA	NA	NA	NA	NA	NA	NA	NA	NA	NA
3136	hallow	33_27_55	India	1	hallow_20	Temp_HR	27 C	55 % RH	CY	female	24	NA	0.3122	0.0282661	Right	Hindwing	NA	NA	NA	NA	NA	NA	NA	NA	NA	NA	NA	NA
3141	hallow	34_27_55	India	1	hallow_20	Temp_HR	27 C	55 % RH	CY	female	24	NA	0.3069	0.0281053	Right	Forewing	NA	NA	NA	NA	NA	NA	NA	NA	NA	NA	NA	NA
3142	hallow	34_27_55	India	1	hallow_20	Temp_HR	27 C	55 % RH	CY	female	24	NA	0.3069	0.0281053	Right	Hindwing	NA	NA	NA	NA	NA	NA	NA	NA	NA	NA	NA	NA
3147	hallow	35_27_55	India	1	hallow_20	Temp_HR	27 C	55 % RH	CY	male	24	10	0.3721	0.0299692	Right	Forewing	NA	dry	134.893	NA	1.9316	0.0134365	NA	NA	NA	NA	NA	0.115916
3148	hallow	35_27_55	India	1	hallow_20	Temp_HR	27 C	55 % RH	CY	male	24	10	0.3721	0.0299692	Right	Hindwing	NA	dry	100.97	NA	6.5858	0.0911756	NA	NA	NA	NA	NA	0.301953
3171	hallow	4_27_55	India	1	hallow_10	Temp_HR	27 C	55 % RH	CY	male	18	NA	0.5013	0.0441327	Right	Forewing	NA	NA	NA	NA	NA	NA	NA	NA	NA	NA	NA	NA
3172	hallow	4_27_55	India	1	hallow_10	Temp_HR	27 C	55 % RH	CY	male	18	NA	0.5013	0.0441327	Right	Hindwing	NA	NA	NA	NA	NA	NA	NA	NA	NA	NA	NA	NA
3199	hallow	5_27_55	India	1	hallow_12	Temp_HR	27 C	55 % RH	CY	male	23	NA	0.322	0.0298005	Right	Forewing	NA	NA	NA	NA	NA	NA	NA	NA	NA	NA	NA	NA
3200	hallow	5_27_55	India	1	hallow_12	Temp_HR	27 C	55 % RH	CY	male	23	NA	0.322	0.0298005	Right	Hindwing	NA	NA	NA	NA	NA	NA	NA	NA	NA	NA	NA	NA
3229	hallow	6_27_55	India	1	hallow_16	Temp_HR	27 C	55 % RH	CY	female	23	8	0.3961	0.0319306	Right	Forewing	NA	wet	113.426	NA	2.8023	0.043007	NA	NA	NA	NA	NA	0.207381
3230	hallow	6_27_55	India	1	hallow_16	Temp_HR	27 C	55 % RH	CY	female	23	8	0.3961	0.0319306	Right	Hindwing	NA	wet	115.144	NA	10.0421	0.0988945	NA	NA	NA	NA	NA	0.314475
3245	hallow	7_27_55	India	1	hallow_16	Temp_HR	27 C	55 % RH	CY	female	23	13	0.4649	0.0336815	Right	Forewing	NA	wet	NA	NA	NA	NA	NA	NA	NA	NA	NA	NA
3246	hallow	7_27_55	India	1	hallow_16	Temp_HR	27 C	55 % RH	CY	female	23	13	0.4649	0.0336815	Right	Hindwing	NA	wet	NA	NA	NA	NA	NA	NA	NA	NA	NA	NA
3253	hallow	8_27_55	India	1	hallow_10	Temp_HR	27 C	55 % RH	CY	male	25	7	0.3275	0.0275717	Right	Forewing	NA	dry	104.687	NA	1.9337	0.054299	NA	NA	NA	NA	NA	0.233021
3254	hallow	8_27_55	India	1	hallow_10	Temp_HR	27 C	55 % RH	CY	male	25	7	0.3275	0.0275717	Right	Hindwing	NA	dry	110.585	NA	7.6801	0.0760493	NA	NA	NA	NA	NA	0.27577
3263	hallow	9_27_55	India	1	hallow_10	Temp_HR	27 C	55 % RH	CY	female	25	9	0.4132	0.0297929	Right	Forewing	NA	dry	122.368	NA	3.1136	0.00523828	NA	NA	NA	NA	NA	0.0723759
3264	hallow	9_27_55	India	1	hallow_10	Temp_HR	27 C	55 % RH	CY	female	25	9	0.4132	0.0297929	Right	Hindwing	NA	dry	125.3	NA	10.593	0.0178619	NA	NA	NA	NA	NA	0.133648
3269	hallow	1_27_85	India	unk	NA	Temp_HR	27 C	85 % RH	CY	NA	NA	NA	NA	NA	Right	Forewing	uns	NA	108.289	NA	1.909	0.0487103	NA	NA	NA	NA	NA	0.220704
3270	hallow	1_27_85	India	unk	NA	Temp_HR	27 C	85 % RH	CY	NA	NA	NA	NA	NA	Right	Hindwing	uns	NA	105.294	NA	7.9126	0.0829354	NA	NA	NA	NA	NA	0.287985
3271	hallow	10_27_85	India	unk	NA	Temp_HR	27 C	85 % RH	CY	NA	NA	NA	NA	NA	Right	Forewing	uns	NA	96.0431	NA	0.6411	0.03518	NA	NA	NA	NA	NA	0.187563
3272	hallow	10_27_85	India	unk	NA	Temp_HR	27 C	85 % RH	CY	NA	NA	NA	NA	NA	Right	Hindwing	uns	NA	94.7404	NA	3.9872	0.0660795	NA	NA	NA	NA	NA	0.257059
3275	hallow	11_27_85	India	unk	NA	Temp_HR	27 C	85 % RH	CY	NA	NA	NA	NA	NA	Right	Forewing	uns	NA	113.779	NA	2.2181	0.0518529	NA	NA	NA	NA	NA	0.227712
3276	hallow	11_27_85	India	unk	NA	Temp_HR	27 C	85 % RH	CY	NA	NA	NA	NA	NA	Right	Hindwing	uns	NA	111.101	NA	7.9402	0.0903532	NA	NA	NA	NA	NA	0.300588
3277	hallow	12_27_85	India	unk	NA	Temp_HR	27 C	85 % RH	CY	NA	NA	NA	NA	NA	Right	Forewing	uns	NA	90.8993	NA	0.9184	0.0654537	NA	NA	NA	NA	NA	0.255839
3278	hallow	12_27_85	India	unk	NA	Temp_HR	27 C	85 % RH	CY	NA	NA	NA	NA	NA	Right	Hindwing	uns	NA	92.7612	NA	5.5828	0.0903233	NA	NA	NA	NA	NA	0.300538
3283	hallow	14_27_85	India	unk	NA	Temp_HR	27 C	85 % RH	CY	NA	NA	NA	NA	NA	Right	Forewing	uns	NA	123.655	NA	1.8147	0.0356031	NA	NA	NA	NA	NA	0.188688
3284	hallow	14_27_85	India	unk	NA	Temp_HR	27 C	85 % RH	CY	NA	NA	NA	NA	NA	Right	Hindwing	uns	NA	120.743	NA	10.0067	0.064553	NA	NA	NA	NA	NA	0.254073
3287	hallow	15_27_85	India	unk	NA	Temp_HR	27 C	85 % RH	CY	NA	NA	NA	NA	NA	Right	Forewing	uns	NA	142.583	NA	2.2003	0.0633146	NA	NA	NA	NA	NA	0.251624
3288	hallow	15_27_85	India	unk	NA	Temp_HR	27 C	85 % RH	CY	NA	NA	NA	NA	NA	Right	Hindwing	uns	NA	145.58	NA	11.5022	0.0962369	NA	NA	NA	NA	NA	0.310221
3291	hallow	16_27_85	India	unk	NA	Temp_HR	27 C	85 % RH	CY	NA	NA	NA	NA	NA	Right	Forewing	uns	NA	107.922	NA	2.2387	0.0477132	NA	NA	NA	NA	NA	0.218434
3292	hallow	16_27_85	India	unk	NA	Temp_HR	27 C	85 % RH	CY	NA	NA	NA	NA	NA	Right	Hindwing	uns	NA	102.84	NA	11.3524	0.0745495	NA	NA	NA	NA	NA	0.273038
3295	hallow	17_27_85	India	unk	NA	Temp_HR	27 C	85 % RH	CY	NA	NA	NA	NA	NA	Right	Forewing	uns	NA	100.071	NA	1.7266	0.0550998	NA	NA	NA	NA	NA	0.234733
3296	hallow	17_27_85	India	unk	NA	Temp_HR	27 C	85 % RH	CY	NA	NA	NA	NA	NA	Right	Hindwing	uns	NA	96.7267	NA	6.4392	0.095989	NA	NA	NA	NA	NA	0.309821
3299	hallow	18_27_85	India	unk	NA	Temp_HR	27 C	85 % RH	CY	NA	NA	NA	NA	NA	Right	Forewing	uns	NA	110.117	NA	1.5528	0.0573955	NA	NA	NA	NA	NA	0.239574
3300	hallow	18_27_85	India	unk	NA	Temp_HR	27 C	85 % RH	CY	NA	NA	NA	NA	NA	Right	Hindwing	uns	NA	111.098	NA	9.7686	0.0912123	NA	NA	NA	NA	NA	0.302014
3303	hallow	19_27_85	India	unk	NA	Temp_HR	27 C	85 % RH	CY	NA	NA	NA	NA	NA	Right	Forewing	uns	NA	99.9474	NA	1.1411	0.0312755	NA	NA	NA	NA	NA	0.176849
3304	hallow	19_27_85	India	unk	NA	Temp_HR	27 C	85 % RH	CY	NA	NA	NA	NA	NA	Right	Hindwing	uns	NA	100.92	NA	8.5778	0.05622	NA	NA	NA	NA	NA	0.237108
3307	hallow	2_27_85	India	unk	NA	Temp_HR	27 C	85 % RH	CY	NA	NA	NA	NA	NA	Right	Forewing	NA	NA	110.906	NA	1.9023	0.0439839	NA	NA	NA	NA	NA	0.209723
3308	hallow	2_27_85	India	unk	NA	Temp_HR	27 C	85 % RH	CY	NA	NA	NA	NA	NA	Right	Hindwing	NA	NA	105.294	NA	7.9126	0.0829354	NA	NA	NA	NA	NA	0.287985
3317	hallow	23_27_85	India	unk	NA	Temp_HR	27 C	85 % RH	CY	NA	NA	NA	NA	NA	Right	Forewing	NA	NA	91.0888	NA	1.5638	0.0478138	NA	NA	NA	NA	NA	0.218664
3318	hallow	23_27_85	India	unk	NA	Temp_HR	27 C	85 % RH	CY	NA	NA	NA	NA	NA	Right	Hindwing	NA	NA	85.7699	NA	7.614	0.089578	NA	NA	NA	NA	NA	0.299296
3323	hallow	25_27_85	India	unk	NA	Temp_HR	27 C	85 % RH	CY	NA	NA	NA	NA	NA	Right	Forewing	NA	NA	138.775	NA	2.6082	0.0629134	NA	NA	NA	NA	NA	0.250825
3324	hallow	25_27_85	India	unk	NA	Temp_HR	27 C	85 % RH	CY	NA	NA	NA	NA	NA	Right	Hindwing	NA	NA	144.146	NA	10.3006	0.081072	NA	NA	NA	NA	NA	0.284731
3327	hallow	26_27_85	India	unk	NA	Temp_HR	27 C	85 % RH	CY	NA	NA	NA	NA	NA	Right	Forewing	NA	NA	120.3	NA	2.6593	0.0482561	NA	NA	NA	NA	NA	0.219673
3328	hallow	26_27_85	India	unk	NA	Temp_HR	27 C	85 % RH	CY	NA	NA	NA	NA	NA	Right	Hindwing	NA	NA	119.056	NA	9.8291	0.0841543	NA	NA	NA	NA	NA	0.290094
3331	hallow	27_27_85	India	unk	NA	Temp_HR	27 C	85 % RH	CY	NA	NA	NA	NA	NA	Right	Forewing	NA	NA	126.077	NA	1.675	0.0493492	NA	NA	NA	NA	NA	0.222147
3332	hallow	27_27_85	India	unk	NA	Temp_HR	27 C	85 % RH	CY	NA	NA	NA	NA	NA	Right	Hindwing	NA	NA	115.277	NA	9.2304	0.0897875	NA	NA	NA	NA	NA	0.299646
3333	hallow	28_27_85	India	unk	NA	Temp_HR	27 C	85 % RH	CY	NA	NA	NA	NA	NA	Right	Forewing	NA	NA	105.167	NA	0.9969	0.0663633	NA	NA	NA	NA	NA	0.257611
3334	hallow	28_27_85	India	unk	NA	Temp_HR	27 C	85 % RH	CY	NA	NA	NA	NA	NA	Right	Hindwing	NA	NA	109.82	NA	6.2812	0.08328	NA	NA	NA	NA	NA	0.288583
3335	hallow	29_27_85	India	unk	NA	Temp_HR	27 C	85 % RH	CY	NA	NA	NA	NA	NA	Right	Forewing	NA	NA	86.4792	NA	1.3352	0.0331294	NA	NA	NA	NA	NA	0.182015
3336	hallow	29_27_85	India	unk	NA	Temp_HR	27 C	85 % RH	CY	NA	NA	NA	NA	NA	Right	Hindwing	NA	NA	77.87	NA	6.1208	0.0625941	NA	NA	NA	NA	NA	0.250188
3339	hallow	3_27_85	India	unk	NA	Temp_HR	27 C	85 % RH	CY	NA	NA	NA	NA	NA	Right	Forewing	NA	NA	120.288	NA	1.633	0.0589701	NA	NA	NA	NA	NA	0.242838
3340	hallow	3_27_85	India	unk	NA	Temp_HR	27 C	85 % RH	CY	NA	NA	NA	NA	NA	Right	Hindwing	NA	NA	112.51	NA	9.2137	0.104002	NA	NA	NA	NA	NA	0.322493
3341	hallow	30_27_85	India	unk	NA	Temp_HR	27 C	85 % RH	CY	NA	NA	NA	NA	NA	Right	Forewing	NA	NA	118.466	NA	3.3325	0.00727043	NA	NA	NA	NA	NA	0.0852668
3342	hallow	30_27_85	India	unk	NA	Temp_HR	27 C	85 % RH	CY	NA	NA	NA	NA	NA	Right	Hindwing	NA	NA	123.007	NA	11.2262	0.0106604	NA	NA	NA	NA	NA	0.103249
3343	hallow	31_27_85	India	unk	NA	Temp_HR	27 C	85 % RH	CY	NA	NA	NA	NA	NA	Right	Forewing	NA	NA	123.269	NA	2.3848	0.0517916	NA	NA	NA	NA	NA	0.227578
3344	hallow	31_27_85	India	unk	NA	Temp_HR	27 C	85 % RH	CY	NA	NA	NA	NA	NA	Right	Hindwing	NA	NA	115.891	NA	10.7835	0.104279	NA	NA	NA	NA	NA	0.322923
3345	hallow	32_27_85	India	unk	NA	Temp_HR	27 C	85 % RH	CY	NA	NA	NA	NA	NA	Right	Forewing	NA	NA	118.162	NA	1.5483	0.0238605	NA	NA	NA	NA	NA	0.154469
3346	hallow	32_27_85	India	unk	NA	Temp_HR	27 C	85 % RH	CY	NA	NA	NA	NA	NA	Right	Hindwing	NA	NA	121.061	NA	9.0036	0.104997	NA	NA	NA	NA	NA	0.324032
3347	hallow	33_27_85	India	unk	NA	Temp_HR	27 C	85 % RH	CY	NA	NA	NA	NA	NA	Right	Forewing	NA	NA	131.08	NA	3.2019	0.0138945	NA	NA	NA	NA	NA	0.117875
3348	hallow	33_27_85	India	unk	NA	Temp_HR	27 C	85 % RH	CY	NA	NA	NA	NA	NA	Right	Hindwing	NA	NA	133.423	NA	12.3529	0.0295692	NA	NA	NA	NA	NA	0.171957
3349	hallow	34_27_85	India	unk	NA	Temp_HR	27 C	85 % RH	CY	NA	NA	NA	NA	NA	Right	Forewing	NA	NA	123.23	NA	2.2071	0.0358646	NA	NA	NA	NA	NA	0.189379
3350	hallow	34_27_85	India	unk	NA	Temp_HR	27 C	85 % RH	CY	NA	NA	NA	NA	NA	Right	Hindwing	NA	NA	121.424	NA	10.5249	0.0683292	NA	NA	NA	NA	NA	0.261398
3357	hallow	6_27_85	India	unk	NA	Temp_HR	27 C	85 % RH	CY	NA	NA	NA	NA	NA	Right	Forewing	NA	NA	103.672	NA	1.4159	0.0532149	NA	NA	NA	NA	NA	0.230684
3358	hallow	6_27_85	India	unk	NA	Temp_HR	27 C	85 % RH	CY	NA	NA	NA	NA	NA	Right	Hindwing	NA	NA	93.938	NA	8.361	0.0851711	NA	NA	NA	NA	NA	0.291841
3365	hallow	9_27_85	India	unk	NA	Temp_HR	27 C	85 % RH	CY	NA	NA	NA	NA	NA	Right	Forewing	NA	NA	121.004	NA	1.9499	0.0469769	NA	NA	NA	NA	NA	0.216742
3366	hallow	9_27_85	India	unk	NA	Temp_HR	27 C	85 % RH	CY	NA	NA	NA	NA	NA	Right	Hindwing	NA	NA	123.696	NA	9.0545	0.0924175	NA	NA	NA	NA	NA	0.304002
325	moore	28-10-03	Ghana	2	Temp_10.1	Temp_1	28 C	75 % RH	CY	male	NA	NA	NA	NA	Left	Forewing	ups	wet	106.819	0.20205	0.2033	0.0351234	NA	NA	NA	NA	102	0.194222
1387	moore	28-10-03	Ghana	2	Temp_10.1	Temp_1	28 C	75 % RH	CY	male	NA	NA	NA	NA	Right	Hindwing	uns	wet	106.628	1.8679	6.7005	0.0693313	NA	NA	NA	NA	102	0.26511
129	moore	28-10-04	Ghana	2	Temp_10.1	Temp_1	28 C	75 % RH	CY	female	NA	NA	NA	NA	Right	Forewing	uns	wet	136.62	0.494	1.53975	0.0511543	NA	NA	NA	NA	102	0.226619
1062	moore	28-10-04	Ghana	2	Temp_10.1	Temp_1	28 C	75 % RH	CY	female	NA	NA	NA	NA	Right	Hindwing	uns	wet	143.367	3.31345	10.0876	0.0981535	NA	NA	NA	NA	102	0.313697
144	moore	28-10-05	Ghana	2	Temp_10.1	Temp_1	28 C	75 % RH	CY	female	NA	NA	NA	NA	Left	Forewing	ups	wet	129.576	0.391	1.2959	0.0488196	NA	NA	NA	NA	102	0.220676
1080	moore	28-10-05	Ghana	2	Temp_10.1	Temp_1	28 C	75 % RH	CY	female	NA	NA	NA	NA	Left	Hindwing	ups	wet	126.885	2.7719	9.23555	0.0962781	NA	NA	NA	NA	102	0.30576
507	moore	28-10-06	Ghana	2	Temp_10.1	Temp_1	28 C	75 % RH	CY	male	NA	NA	NA	NA	Left	Forewing	ups	wet	111.968	0.18865	0.148665	0.0220729	NA	NA	NA	NA	102	0.167308
1459	moore	28-10-06	Ghana	2	Temp_10.1	Temp_1	28 C	75 % RH	CY	male	NA	NA	NA	NA	Left	Hindwing	ups	wet	112.08	2.1417	6.73	0.0606229	NA	NA	NA	NA	102	0.246217
266	moore	28-10-07	Ghana	2	Temp_10.1	Temp_1	28 C	75 % RH	CY	female	NA	NA	NA	NA	Left	Forewing	ups	wet	126.25	0.20305	0.718	0.0363507	NA	NA	NA	NA	102	0.198445
1113	moore	28-10-07	Ghana	2	Temp_10.1	Temp_1	28 C	75 % RH	CY	female	NA	NA	NA	NA	Right	Hindwing	uns	wet	130.52	2.8692	9.37785	0.0875527	NA	NA	NA	NA	102	0.308068
242	moore	28-10-10	Ghana	2	Temp_10.1	Temp_1	28 C	75 % RH	CY	female	NA	NA	NA	NA	Right	Forewing	uns	wet	137.732	0.6611	2.45465	0.0294102	NA	NA	NA	NA	102	0.176594
1210	moore	28-10-10	Ghana	2	Temp_10.1	Temp_1	28 C	75 % RH	CY	female	NA	NA	NA	NA	Left	Hindwing	ups	wet	128.487	3.61435	12.4556	0.0702465	NA	NA	NA	NA	102	0.269659
404	moore	28-10-13	Ghana	2	Temp_10.1	Temp_1	28 C	75 % RH	CY	female	22	NA	0.3563	0.0322242	Right	Forewing	uns	wet	90.9044	0.56475	1.8509	0.028461	NA	NA	NA	NA	102	0.170596
1541	moore	28-10-13	Ghana	2	Temp_10.1	Temp_1	28 C	75 % RH	CY	female	22	NA	0.3563	0.0322242	Left	Hindwing	ups	wet	76.2872	2.2262	7.7167	0.0837795	NA	NA	NA	NA	102	0.289447
590	moore	28-11-02	Ghana	3	Temp_11.2	Temp_2	28 C	75 % RH	CY	female	17	5	0.506	0.0468743	Left	Forewing	ups	wet	136.422	0.5977	1.88985	0.0403717	NA	NA	NA	NA	156	0.199922
1227	moore	28-11-02	Ghana	3	Temp_11.2	Temp_2	28 C	75 % RH	CY	female	17	5	0.506	0.0468743	Right	Hindwing	uns	wet	141.141	3.214	11.0407	0.0670908	NA	NA	NA	NA	156	0.261773
200	moore	28-11-03	Ghana	2	Temp_11.1	Temp_1	28 C	75 % RH	CY	female	NA	NA	NA	NA	Left	Forewing	ups	wet	140.143	0.54895	1.64815	0.0343132	NA	NA	NA	NA	102	0.189978
1055	moore	28-11-03	Ghana	2	Temp_11.1	Temp_1	28 C	75 % RH	CY	female	NA	NA	NA	NA	Right	Hindwing	uns	wet	145.514	3.51325	11.4456	0.101494	NA	NA	NA	NA	102	0.320272
408	moore	28-11-04	Ghana	2	Temp_11.1	Temp_1	28 C	75 % RH	CY	female	NA	NA	NA	NA	Left	Forewing	ups	wet	132.476	0.6824	2.2362	0.028489	NA	NA	NA	NA	102	0.168787
263	moore	28-11-08	Ghana	2	Temp_11.1	Temp_1	28 C	75 % RH	CY	female	16	5	0.4442	0.0476877	Right	Forewing	uns	wet	121.345	0.3459	1.42595	0.0307763	NA	NA	NA	NA	102	0.194762
1389	moore	28-11-08	Ghana	2	Temp_11.1	Temp_1	28 C	75 % RH	CY	female	16	5	0.4442	0.0476877	Right	Hindwing	uns	wet	119.381	2.8753	8.9125	0.0651855	NA	NA	NA	NA	102	0.25175
460	moore	28-11-09	Ghana	2	Temp_11.1	Temp_1	28 C	75 % RH	CY	male	16	6	0.4329	0.0472798	Left	Forewing	ups	wet	94.4741	0.18085	0.40475	0.0285988	NA	NA	NA	NA	102	0.176899
1405	moore	28-11-09	Ghana	2	Temp_11.1	Temp_1	28 C	75 % RH	CY	male	16	6	0.4329	0.0472798	Left	Hindwing	ups	wet	97.454	1.4859	6.1289	0.0768885	NA	NA	NA	NA	102	0.277801
462	moore	28-11-10	Ghana	2	Temp_11.1	Temp_1	28 C	75 % RH	CY	female	16	6	0.4723	0.0486728	Left	Forewing	ups	wet	118.565	0.53015	1.4713	0.0268821	NA	NA	NA	NA	102	0.176467
1299	moore	28-11-10	Ghana	2	Temp_11.1	Temp_1	28 C	75 % RH	CY	female	16	6	0.4723	0.0486728	Left	Hindwing	ups	wet	126.589	3.04775	9.3276	0.0713215	NA	NA	NA	NA	102	0.265639
174	moore	28-11-11	Ghana	2	Temp_11.1	Temp_1	28 C	75 % RH	CY	female	16	6	0.4105	0.0464499	Left	Forewing	ups	wet	116.396	0.37605	1.0452	0.0450643	NA	NA	NA	NA	102	0.217758
1086	moore	28-11-11	Ghana	2	Temp_11.1	Temp_1	28 C	75 % RH	CY	female	16	6	0.4105	0.0464499	Left	Hindwing	ups	wet	114.493	2.54365	8.78755	0.109707	NA	NA	NA	NA	102	0.329642
156	moore	28-11-12	Ghana	2	Temp_11.1	Temp_1	28 C	75 % RH	CY	female	17	8	0.4642	0.0455463	Right	Forewing	uns	wet	128.702	0.5273	1.7846	0.045179	NA	NA	NA	NA	102	0.212553
53	moore	28-12-01	Ghana	3	Temp_12.2	Temp_2	28 C	75 % RH	CY	male	15	6	0.4341	0.0504784	Right	Forewing	uns	wet	112.334	0.298	0.67565	0.0400744	NA	NA	NA	NA	156	0.204482
1416	moore	28-12-01	Ghana	3	Temp_12.2	Temp_2	28 C	75 % RH	CY	male	15	6	0.4341	0.0504784	Right	Hindwing	uns	wet	110.145	2.35125	7.96715	0.0721045	NA	NA	NA	NA	156	0.266437
608	moore	28-12-03	Ghana	3	Temp_12.2	Temp_2	28 C	75 % RH	CY	female	16	6	0.3994	0.0460274	Left	Forewing	ups	wet	118.89	0.44495	1.3406	0.0586244	NA	NA	NA	NA	156	0.239104
1120	moore	28-12-03	Ghana	3	Temp_12.2	Temp_2	28 C	75 % RH	CY	female	16	6	0.3994	0.0460274	Right	Hindwing	uns	wet	107.854	2.3721	8.35635	0.111133	NA	NA	NA	NA	156	0.331508
578	moore	28-12-05	Ghana	3	Temp_12.2	Temp_2	28 C	75 % RH	CY	female	17	6	0.4623	0.045484	Left	Forewing	ups	wet	133.641	0.53805	1.8765	0.0476506	NA	NA	NA	NA	156	0.215579
1165	moore	28-12-05	Ghana	3	Temp_12.2	Temp_2	28 C	75 % RH	CY	female	17	6	0.4623	0.045484	Right	Hindwing	uns	wet	136.663	3.3179	9.8898	0.0798778	NA	NA	NA	NA	156	0.280797
611	moore	28-12-06	Ghana	3	Temp_12.2	Temp_2	28 C	75 % RH	CY	female	18	6	0.5184	0.0446289	Right	Forewing	uns	wet	154.11	0.58765	2.0171	0.0510043	NA	NA	NA	NA	156	0.223127
1193	moore	28-12-06	Ghana	3	Temp_12.2	Temp_2	28 C	75 % RH	CY	female	18	6	0.5184	0.0446289	Left	Hindwing	ups	wet	144.39	3.798	13.4253	0.0595196	NA	NA	NA	NA	156	0.257446
859	moore	28-12-08	Ghana	3	Temp_12.2	Temp_2	28 C	75 % RH	CY	female	19	6	0.404	0.0389081	Left	Forewing	ups	wet	117.493	0.4837	1.8091	0.0881037	NA	NA	NA	NA	156	0.296823
1087	moore	28-12-08	Ghana	3	Temp_12.2	Temp_2	28 C	75 % RH	CY	female	19	6	0.404	0.0389081	Left	Hindwing	ups	wet	107.825	3.7714	12.7717	0.126086	NA	NA	NA	NA	156	0.355086
55	moore	28-13-01	Ghana	3	Temp_13.2	Temp_2	28 C	75 % RH	CY	male	15	6	0.4871	0.0524543	Right	Forewing	uns	wet	109.312	0.20865	0.41435	0.0536104	NA	NA	NA	NA	156	0.222865
1419	moore	28-13-01	Ghana	3	Temp_13.2	Temp_2	28 C	75 % RH	CY	male	15	6	0.4871	0.0524543	Right	Hindwing	uns	wet	110.977	2.06295	6.6533	0.0717681	NA	NA	NA	NA	156	0.26955
56	moore	28-13-02	Ghana	3	Temp_13.2	Temp_2	28 C	75 % RH	CY	male	15	6	0.426	0.0501624	Left	Forewing	ups	wet	95.2897	0.144755	0.3676	0.05015	NA	NA	NA	NA	156	0.237002
1318	moore	28-13-02	Ghana	3	Temp_13.2	Temp_2	28 C	75 % RH	CY	male	15	6	0.426	0.0501624	Left	Hindwing	ups	wet	101.278	1.859	6.89245	0.0829775	NA	NA	NA	NA	156	0.300454
878	moore	28-13-06	Ghana	3	Temp_13.2	Temp_2	28 C	75 % RH	CY	male	17	6	0.3841	0.0427595	Left	Forewing	ups	wet	82.4993	0.23075	0.6905	0.0546217	NA	NA	NA	NA	156	0.241907
999	moore	28-14-01	Ghana	3	Temp_14.2	Temp_2	28 C	75 % RH	CY	male	16	5	0.4665	0.0484727	Right	Forewing	uns	wet	109.893	0.2138	0.28525	0.0388479	NA	NA	NA	NA	158	0.203849
1576	moore	28-14-01	Ghana	3	Temp_14.2	Temp_2	28 C	75 % RH	CY	male	16	5	0.4665	0.0484727	Right	Hindwing	uns	wet	107.961	2.11995	6.33715	0.0506557	NA	NA	NA	NA	158	0.224105
94	moore	28-14-03	Ghana	3	Temp_14.2	Temp_2	28 C	75 % RH	CY	male	17	6	0.3902	0.0429847	Left	Forewing	ups	wet	95.9041	0.12915	0.29645	0.0513035	NA	NA	NA	NA	158	0.229659
1543	moore	28-14-03	Ghana	3	Temp_14.2	Temp_2	28 C	75 % RH	CY	male	17	6	0.3902	0.0429847	Left	Hindwing	ups	wet	99.0551	2.0328	6.03955	0.0650237	NA	NA	NA	NA	158	0.258443
50	moore	28-14-04	Ghana	3	Temp_14.2	Temp_2	28 C	75 % RH	CY	male	17	7	0.3954	0.0431748	Right	Forewing	uns	wet	97.7875	0.29175	0.84505	0.0469949	NA	NA	NA	NA	158	0.234239
1267	moore	28-14-04	Ghana	3	Temp_14.2	Temp_2	28 C	75 % RH	CY	male	17	7	0.3954	0.0431748	Left	Hindwing	ups	wet	106.297	2.479	8.60855	0.0722126	NA	NA	NA	NA	158	0.275574
92	moore	28-14-05	Ghana	3	Temp_14.2	Temp_2	28 C	75 % RH	CY	male	18	6	0.3943	0.0407383	Left	Forewing	ups	wet	99.2536	0.2979	0.8194	0.0478065	NA	NA	NA	NA	158	0.218049
1476	moore	28-14-05	Ghana	3	Temp_14.2	Temp_2	28 C	75 % RH	CY	male	18	6	0.3943	0.0407383	Right	Hindwing	uns	wet	103.811	2.728	9.37845	0.0626238	NA	NA	NA	NA	158	0.25469
46	moore	28-14-07	Ghana	3	Temp_14.2	Temp_2	28 C	75 % RH	CY	male	19	6	0.4184	0.039365	Left	Forewing	ups	wet	106.48	0.31465	0.65155	0.0383207	NA	NA	NA	NA	158	0.20338
1564	moore	28-14-07	Ghana	3	Temp_14.2	Temp_2	28 C	75 % RH	CY	male	19	6	0.4184	0.039365	Left	Hindwing	ups	wet	99.9852	1.83865	6.5819	0.0565184	NA	NA	NA	NA	158	0.245836
730	moore	28-14-08	Ghana	3	Temp_14.2	Temp_2	28 C	75 % RH	CY	male	19	6	0.3715	0.0378355	Right	Forewing	uns	wet	100.148	0.3762	1.0939	0.0381207	NA	NA	NA	NA	158	0.200472
1328	moore	28-14-08	Ghana	3	Temp_14.2	Temp_2	28 C	75 % RH	CY	male	19	6	0.3715	0.0378355	Right	Hindwing	uns	wet	99.3709	2.32565	8.5485	0.0772151	NA	NA	NA	NA	158	0.278847
519	moore	28-14-10	Ghana	3	Temp_14.2	Temp_2	28 C	75 % RH	CY	female	21	7	0.4826	0.0373517	Right	Forewing	uns	wet	149.017	0.5975	1.7623	0.0286676	NA	NA	NA	NA	158	0.175214
1079	moore	28-14-10	Ghana	3	Temp_14.2	Temp_2	28 C	75 % RH	CY	female	21	7	0.4826	0.0373517	Left	Hindwing	ups	wet	144.341	3.7072	11.9736	0.078431	NA	NA	NA	NA	158	0.292294
827	moore	28-14-12	Ghana	3	Temp_14.2	Temp_2	28 C	75 % RH	CY	female	24	6	0.2522	0.0263251	Left	Forewing	ups	wet	86.0774	0.4464	1.6828	0.0215998	NA	NA	NA	NA	158	0.150879
1664	moore	28-14-12	Ghana	3	Temp_14.2	Temp_2	28 C	75 % RH	CY	female	24	6	0.2522	0.0263251	Left	Hindwing	ups	wet	78.5905	2.1596	7.579	0.0433556	NA	NA	NA	NA	158	0.20873
880	moore	28-14-13	Ghana	3	Temp_14.2	Temp_2	28 C	75 % RH	CY	female	27	6	0.6031	0.031292	Right	Forewing	uns	wet	147.353	0.6136	2.4517	0.0480677	NA	NA	NA	NA	158	0.210813
1150	moore	28-14-13	Ghana	3	Temp_14.2	Temp_2	28 C	75 % RH	CY	female	27	6	0.6031	0.031292	Right	Hindwing	uns	wet	150.493	3.54235	11.961	0.0697479	NA	NA	NA	NA	158	0.264178
1345	moore	28-15-01	Ghana	3	Temp_15.2	Temp_2	28 C	75 % RH	CY	male	15	6	0.429	0.0502799	Left	Hindwing	ups	wet	102.874	2.2164	6.731	0.0798116	NA	NA	NA	NA	160	0.28371
51	moore	28-15-03	Ghana	3	Temp_15.2	Temp_2	28 C	75 % RH	CY	male	17	6	0.4159	0.0439084	Right	Forewing	uns	wet	107.763	0.2698	0.90775	0.0381347	NA	NA	NA	NA	160	0.198937
1444	moore	28-15-03	Ghana	3	Temp_15.2	Temp_2	28 C	75 % RH	CY	male	17	6	0.4159	0.0439084	Right	Hindwing	uns	wet	110.714	2.59355	9.4009	0.0613022	NA	NA	NA	NA	160	0.252566
48	moore	28-15-05	Ghana	3	Temp_15.2	Temp_2	28 C	75 % RH	CY	male	18	6	0.3408	0.0388056	Right	Forewing	uns	wet	102.171	0.25755	0.75905	0.038464	NA	NA	NA	NA	160	0.199816
1368	moore	28-15-05	Ghana	3	Temp_15.2	Temp_2	28 C	75 % RH	CY	male	18	6	0.3408	0.0388056	Right	Hindwing	uns	wet	95.6587	1.9071	6.83265	0.0782212	NA	NA	NA	NA	160	0.283433
47	moore	28-15-06	Ghana	3	Temp_15.2	Temp_2	28 C	75 % RH	CY	female	18	6	0.447	0.0424779	Right	Forewing	uns	wet	134.602	0.61175	2.1324	0.0503529	NA	NA	NA	NA	160	0.226002
1103	moore	28-15-06	Ghana	3	Temp_15.2	Temp_2	28 C	75 % RH	CY	female	18	6	0.447	0.0424779	Left	Hindwing	ups	wet	142.032	3.3765	10.6442	0.0853118	NA	NA	NA	NA	160	0.288696
91	moore	28-15-08	Ghana	3	Temp_15.2	Temp_2	28 C	75 % RH	CY	male	19	5	0.3576	0.0373576	Left	Forewing	ups	wet	101.413	0.3025	0.7052	0.0499618	NA	NA	NA	NA	160	0.229942
1394	moore	28-15-08	Ghana	3	Temp_15.2	Temp_2	28 C	75 % RH	CY	male	19	5	0.3576	0.0373576	Left	Hindwing	ups	wet	93.547	1.69815	6.1971	0.0734014	NA	NA	NA	NA	160	0.271001
669	moore	28-16-01	Ghana	3	Temp_16.2	Temp_2	28 C	75 % RH	CY	male	15	6	0.4739	0.0519762	Left	Forewing	ups	wet	119.723	0.26465	0.8118	0.0314788	NA	NA	NA	NA	161	0.18017
1177	moore	28-16-01	Ghana	3	Temp_16.2	Temp_2	28 C	75 % RH	CY	male	15	6	0.4739	0.0519762	Left	Hindwing	ups	wet	116.61	2.3899	7.9282	0.0795568	NA	NA	NA	NA	161	0.273679
289	moore	28-16-01a	Ghana	2	Temp_16.1	Temp_1	28 C	75 % RH	CY	male	14	6	0.3112	0.0484044	Right	Forewing	uns	wet	87.2538	0.074855	0.12191	0.0476569	NA	NA	NA	NA	105	0.221863
1457	moore	28-16-01a	Ghana	2	Temp_16.1	Temp_1	28 C	75 % RH	CY	male	14	6	0.3112	0.0484044	Right	Hindwing	uns	wet	81.0974	1.56635	5.09655	0.0862088	NA	NA	NA	NA	105	0.287914
493	moore	28-16-02	Ghana	2	Temp_16.1	Temp_1	28 C	75 % RH	CY	male	15	5	0.4074	0.0494215	Left	Forewing	ups	wet	92.01	0.049115	0.19905	0.0341967	NA	NA	NA	NA	105	0.187559
1549	moore	28-16-02	Ghana	2	Temp_16.1	Temp_1	28 C	75 % RH	CY	male	15	5	0.4074	0.0494215	Left	Hindwing	ups	wet	77.012	2.1914	7.7181	0.0814951	NA	NA	NA	NA	105	0.285473
52	moore	28-16-03	Ghana	3	Temp_16.2	Temp_2	28 C	75 % RH	CY	male	16	6	0.4119	0.0465026	Right	Forewing	uns	wet	103.706	0.28875	0.6907	0.0531601	NA	NA	NA	NA	161	0.222824
1336	moore	28-16-03	Ghana	3	Temp_16.2	Temp_2	28 C	75 % RH	CY	male	16	6	0.4119	0.0465026	Right	Hindwing	uns	wet	104.161	2.1921	8.14665	0.0791687	NA	NA	NA	NA	161	0.284279
155	moore	28-16-03a	Ghana	2	Temp_16.1	Temp_1	28 C	75 % RH	CY	male	16	5	0.4397	0.0475261	Left	Forewing	ups	wet	110.791	0.150375	0.308485	0.0524235	NA	NA	NA	NA	105	0.235764
1136	moore	28-16-03a	Ghana	2	Temp_16.1	Temp_1	28 C	75 % RH	CY	male	16	5	0.4397	0.0475261	Left	Hindwing	ups	wet	104.448	2.33375	8.0251	0.107853	NA	NA	NA	NA	105	0.337561
273	moore	28-16-04	Ghana	2	Temp_16.1	Temp_1	28 C	75 % RH	CY	male	16	6	0.3337	0.043351	Right	Forewing	uns	wet	76.1719	0.1739	0.2828	0.0636862	NA	NA	NA	NA	105	0.252361
1443	moore	28-16-04	Ghana	2	Temp_16.1	Temp_1	28 C	75 % RH	CY	male	16	6	0.3337	0.043351	Right	Hindwing	uns	wet	74.269	1.0575	4.3831	0.104442	NA	NA	NA	NA	105	0.323175
117	moore	28-16-07	Ghana	2	Temp_16.1	Temp_1	28 C	75 % RH	CY	female	17	6	0.4308	0.0444266	Left	Forewing	ups	wet	126.901	0.48765	1.27755	0.0676256	NA	NA	NA	NA	105	0.271529
1110	moore	28-16-07	Ghana	2	Temp_16.1	Temp_1	28 C	75 % RH	CY	female	17	6	0.4308	0.0444266	Right	Hindwing	uns	wet	117.754	2.99125	9.0837	0.101072	NA	NA	NA	NA	105	0.32429
312	moore	28-16-08	Ghana	2	Temp_16.1	Temp_1	28 C	75 % RH	CY	male	17	6	0.3532	0.0415807	Left	Forewing	ups	wet	85.0413	0.19845	0.6829	0.0486949	NA	NA	NA	NA	105	0.224048
1403	moore	28-16-08	Ghana	2	Temp_16.1	Temp_1	28 C	75 % RH	CY	male	17	6	0.3532	0.0415807	Right	Hindwing	uns	wet	84.2566	1.5926	5.63895	0.0817526	NA	NA	NA	NA	105	0.294074
574	moore	28-16-11	Ghana	3	Temp_16.2	Temp_2	28 C	75 % RH	CY	female	23	7	0.3731	0.0313002	Right	Forewing	uns	wet	128.493	0.542	2.00415	0.0342674	NA	NA	NA	NA	160	0.191169
1257	moore	28-16-11	Ghana	3	Temp_16.2	Temp_2	28 C	75 % RH	CY	female	23	7	0.3731	0.0313002	Right	Hindwing	uns	wet	122.17	2.79155	9.244	0.0703677	NA	NA	NA	NA	160	0.26315
517	moore	28-17-01	Ghana	2	Temp_17.1	Temp_1	28 C	75 % RH	CY	male	16	NA	0.4187	0.0467571	Right	Forewing	uns	wet	88.6792	0.08486	0.09562	0.0341251	NA	NA	NA	NA	104	0.19746
1337	moore	28-17-01	Ghana	2	Temp_17.1	Temp_1	28 C	75 % RH	CY	male	16	NA	0.4187	0.0467571	Left	Hindwing	ups	wet	92.5845	1.87555	6.5143	0.0899722	NA	NA	NA	NA	104	0.298027
1668	moore	28-17-02	Ghana	2	Temp_17.1	Temp_1	28 C	75 % RH	CY	male	16	8	0.4218	0.0468722	Left	Hindwing	ups	wet	99.0994	1.0826	4.6787	0.0319972	NA	NA	NA	NA	104	0.178878
310	moore	28-17-04	Ghana	2	Temp_17.1	Temp_1	28 C	75 % RH	CY	female	17	6	0.3168	0.0401002	Left	Forewing	ups	wet	94.7566	0.2554	0.8953	0.0415677	NA	NA	NA	NA	104	0.20873
1302	moore	28-17-04	Ghana	2	Temp_17.1	Temp_1	28 C	75 % RH	CY	female	17	6	0.3168	0.0401002	Left	Hindwing	ups	wet	91.1107	2.4741	7.86045	0.104539	NA	NA	NA	NA	104	0.325132
298	moore	28-17-05	Ghana	2	Temp_17.1	Temp_1	28 C	75 % RH	CY	male	17	NA	0.3403	0.0410681	Left	Forewing	ups	wet	81.6161	0.10745	0.5788	0.0482331	NA	NA	NA	NA	104	0.230318
1347	moore	28-17-05	Ghana	2	Temp_17.1	Temp_1	28 C	75 % RH	CY	male	17	NA	0.3403	0.0410681	Left	Hindwing	ups	wet	80.4077	1.8557	5.65195	0.0872404	NA	NA	NA	NA	104	0.299869
571	moore	28-17-07	Ghana	2	Temp_17.1	Temp_1	28 C	75 % RH	CY	male	18	6	0.3907	0.040614	Left	Forewing	ups	wet	90.4163	0.07843	0.2684	0.0248093	NA	NA	NA	NA	104	0.162996
1478	moore	28-17-07	Ghana	2	Temp_17.1	Temp_1	28 C	75 % RH	CY	male	18	6	0.3907	0.040614	Left	Hindwing	ups	wet	93.4026	2.1639	7.33975	0.0635518	NA	NA	NA	NA	104	0.27074
295	moore	28-17-09	Ghana	2	Temp_17.1	Temp_1	28 C	75 % RH	CY	female	20	NA	0.4184	0.0373968	Right	Forewing	uns	wet	117.293	0.5235	1.9308	0.0333042	NA	NA	NA	NA	104	0.180233
1209	moore	28-17-09	Ghana	2	Temp_17.1	Temp_1	28 C	75 % RH	CY	female	20	NA	0.4184	0.0373968	Right	Hindwing	uns	wet	121.61	2.98615	10.4899	0.0752063	NA	NA	NA	NA	104	0.281286
179	moore	28-20-01	Ghana	2	Temp_20.1	Temp_1	28 C	75 % RH	CY	male	16	6	0.4543	0.0480464	Right	Forewing	uns	wet	114.566	0.2745	0.5969	0.0499756	NA	NA	NA	NA	106	0.221816
1382	moore	28-20-01	Ghana	2	Temp_20.1	Temp_1	28 C	75 % RH	CY	male	16	6	0.4543	0.0480464	Left	Hindwing	ups	wet	109.554	2.0189	6.95035	0.0727762	NA	NA	NA	NA	106	0.267069
202	moore	28-20-02	Ghana	2	Temp_20.1	Temp_1	28 C	75 % RH	CY	male	16	6	0.3728	0.044982	Right	Forewing	uns	wet	89.5757	0.17895	0.42675	0.0518961	NA	NA	NA	NA	106	0.231368
1523	moore	28-20-02	Ghana	2	Temp_20.1	Temp_1	28 C	75 % RH	CY	male	16	6	0.3728	0.044982	Left	Hindwing	ups	wet	82.8222	2.02065	7.326	0.0668502	NA	NA	NA	NA	106	0.265668
243	moore	28-20-06	Ghana	2	Temp_20.1	Temp_1	28 C	75 % RH	CY	female	19	8	0.4665	0.0408191	Left	Forewing	ups	wet	125.632	0.4447	1.5465	0.0378025	NA	NA	NA	NA	106	0.196042
1138	moore	28-20-06	Ghana	2	Temp_20.1	Temp_1	28 C	75 % RH	CY	female	19	8	0.4665	0.0408191	Left	Hindwing	ups	wet	129.092	3.57835	11.4355	0.0942127	NA	NA	NA	NA	106	0.316205
184	moore	28-23-01	Ghana	2	Temp_23.1	Temp_1	28 C	75 % RH	CY	male	16	6	0.3915	0.0457219	Left	Forewing	ups	wet	99.4885	0.23055	0.61305	0.0529404	NA	NA	NA	NA	105	0.229397
1486	moore	28-23-01	Ghana	2	Temp_23.1	Temp_1	28 C	75 % RH	CY	male	16	6	0.3915	0.0457219	Right	Hindwing	uns	wet	101.08	1.83645	5.58125	0.0664868	NA	NA	NA	NA	105	0.258528
337	moore	28-23-02	Ghana	2	Temp_23.1	Temp_1	28 C	75 % RH	CY	male	16	5	0.4178	0.0467236	Right	Forewing	uns	wet	106.701	0.25705	0.5667	0.0370621	NA	NA	NA	NA	105	0.194471
1385	moore	28-23-02	Ghana	2	Temp_23.1	Temp_1	28 C	75 % RH	CY	male	16	5	0.4178	0.0467236	Left	Hindwing	ups	wet	104.115	1.96865	6.57015	0.0672471	NA	NA	NA	NA	105	0.258815
180	moore	28-23-03	Ghana	2	Temp_23.1	Temp_1	28 C	75 % RH	CY	male	16	6	0.4189	0.0467646	Right	Forewing	uns	wet	116.306	0.25485	0.5759	0.0448508	NA	NA	NA	NA	105	0.216068
1410	moore	28-23-03	Ghana	2	Temp_23.1	Temp_1	28 C	75 % RH	CY	male	16	6	0.4189	0.0467646	Left	Hindwing	ups	wet	114.126	2.47235	8.27615	0.0616325	NA	NA	NA	NA	105	0.249681
417	moore	28-23-04	Ghana	2	Temp_23.1	Temp_1	28 C	75 % RH	CY	male	16	6	0.3818	0.0453411	Left	Forewing	ups	wet	102.75	0.2406	0.7147	0.0317048	NA	NA	NA	NA	105	0.18205
1409	moore	28-23-04	Ghana	2	Temp_23.1	Temp_1	28 C	75 % RH	CY	male	16	6	0.3818	0.0453411	Left	Hindwing	ups	wet	99.9308	1.99445	6.3517	0.0694466	NA	NA	NA	NA	105	0.267932
382	moore	28-23-05	Ghana	2	Temp_23.1	Temp_1	28 C	75 % RH	CY	male	16	6	0.3645	0.0446457	Left	Forewing	ups	wet	95.026	0.1158	0.1676	0.0369984	NA	NA	NA	NA	105	0.196496
1439	moore	28-23-05	Ghana	2	Temp_23.1	Temp_1	28 C	75 % RH	CY	male	16	6	0.3645	0.0446457	Right	Hindwing	uns	wet	91.3777	1.66785	5.4235	0.0762601	NA	NA	NA	NA	105	0.270908
239	moore	28-23-06	Ghana	2	Temp_23.1	Temp_1	28 C	75 % RH	CY	male	16	6	0.4118	0.0464988	Right	Forewing	uns	wet	95.7656	0.24175	0.66595	0.0476469	NA	NA	NA	NA	105	0.220629
1426	moore	28-23-06	Ghana	2	Temp_23.1	Temp_1	28 C	75 % RH	CY	male	16	6	0.4118	0.0464988	Right	Hindwing	uns	wet	96.0763	1.6908	5.8732	0.0657047	NA	NA	NA	NA	105	0.260357
447	moore	28-23-07	Ghana	2	Temp_23.1	Temp_1	28 C	75 % RH	CY	male	16	6	0.403	0.0461652	Left	Forewing	ups	wet	105.129	0.41665	0.95825	0.0322662	NA	NA	NA	NA	105	0.184031
1380	moore	28-23-07	Ghana	2	Temp_23.1	Temp_1	28 C	75 % RH	CY	male	16	6	0.403	0.0461652	Left	Hindwing	ups	wet	101.017	2.42665	8.2889	0.079033	NA	NA	NA	NA	105	0.279961
346	moore	28-23-08	Ghana	2	Temp_23.1	Temp_1	28 C	75 % RH	CY	male	16	7	0.386	0.0455067	Right	Forewing	uns	wet	95.0379	0.17235	0.2324	0.0443694	NA	NA	NA	NA	105	0.210824
1573	moore	28-23-08	Ghana	2	Temp_23.1	Temp_1	28 C	75 % RH	CY	male	16	7	0.386	0.0455067	Left	Hindwing	ups	wet	94.5181	1.97255	6.50815	0.0641899	NA	NA	NA	NA	105	0.249972
195	moore	28-23-09	Ghana	2	Temp_23.1	Temp_1	28 C	75 % RH	CY	female	17	6	0.5092	0.0469729	Left	Forewing	ups	wet	138.419	0.6511	2.2355	0.0370017	NA	NA	NA	NA	105	0.201184
1194	moore	28-23-09	Ghana	2	Temp_23.1	Temp_1	28 C	75 % RH	CY	female	17	6	0.5092	0.0469729	Left	Hindwing	ups	wet	139.003	3.14695	10.8208	0.0792654	NA	NA	NA	NA	105	0.283936
1168	moore	28-23-11	Ghana	2	Temp_23.1	Temp_1	28 C	75 % RH	CY	female	17	10	0.5346	0.0477413	Right	Hindwing	uns	wet	141.837	3.4148	10.9614	0.0799635	NA	NA	NA	NA	105	0.282778
321	moore	28-23-12	Ghana	2	Temp_23.1	Temp_1	28 C	75 % RH	CY	female	17	10	0.4174	0.0439611	Left	Forewing	ups	wet	119.391	0.51285	1.32015	0.0370637	NA	NA	NA	NA	105	0.198761
1226	moore	28-23-12	Ghana	2	Temp_23.1	Temp_1	28 C	75 % RH	CY	female	17	10	0.4174	0.0439611	Right	Hindwing	uns	wet	120.034	3.02375	10.1935	0.0817768	NA	NA	NA	NA	105	0.285719
240	moore	28-23-14	Ghana	2	Temp_23.1	Temp_1	28 C	75 % RH	CY	female	17	10	0.406	0.0435572	Right	Forewing	uns	wet	123.197	0.43795	1.4803	0.0363044	NA	NA	NA	NA	105	0.194219
1295	moore	28-23-14	Ghana	2	Temp_23.1	Temp_1	28 C	75 % RH	CY	female	17	10	0.406	0.0435572	Left	Hindwing	ups	wet	121.332	2.8625	8.9432	0.0726539	NA	NA	NA	NA	105	0.272549
395	moore	28-23-15	Ghana	2	Temp_23.1	Temp_1	28 C	75 % RH	CY	male	17	10	0.4835	0.0461689	Left	Forewing	ups	wet	111.55	0.3282	0.93495	0.0348096	NA	NA	NA	NA	105	0.186347
1493	moore	28-23-15	Ghana	2	Temp_23.1	Temp_1	28 C	75 % RH	CY	male	17	10	0.4835	0.0461689	Right	Hindwing	uns	wet	106.963	1.8267	6.1906	0.0573802	NA	NA	NA	NA	105	0.245087
385	moore	28-23-16	Ghana	2	Temp_23.1	Temp_1	28 C	75 % RH	CY	male	18	9	0.5276	0.0448913	Left	Forewing	ups	wet	117.276	0.4351	0.80835	0.0278118	NA	NA	NA	NA	105	0.169092
1464	moore	28-23-16	Ghana	2	Temp_23.1	Temp_1	28 C	75 % RH	CY	male	18	9	0.5276	0.0448913	Left	Hindwing	ups	wet	117.507	2.4515	7.68775	0.0568985	NA	NA	NA	NA	105	0.237946
584	moore	28-23-18	Ghana	2	Temp_23.1	Temp_1	28 C	75 % RH	CY	male	18	9	0.4372	0.0421652	Left	Forewing	ups	wet	106.153	0.3011	0.6298	0.0218071	NA	NA	NA	NA	105	0.147672
1569	moore	28-23-18	Ghana	2	Temp_23.1	Temp_1	28 C	75 % RH	CY	male	18	9	0.4372	0.0421652	Left	Hindwing	ups	wet	109.304	2.6991	8.6975	0.0570896	NA	NA	NA	NA	105	0.238934
491	moore	28-23-19	Ghana	2	Temp_23.1	Temp_1	28 C	75 % RH	CY	NA	18	11	0.2982	0.0371162	Left	Forewing	ups	wet	80.2683	0.18535	0.53635	0.0391967	NA	NA	NA	NA	105	0.199082
1594	moore	28-23-19	Ghana	2	Temp_23.1	Temp_1	28 C	75 % RH	CY	NA	18	11	0.2982	0.0371162	Left	Hindwing	ups	wet	84.4335	1.60805	5.7821	0.0638916	NA	NA	NA	NA	105	0.256437
414	moore	28-23-20	Ghana	2	Temp_23.1	Temp_1	28 C	75 % RH	CY	male	18	9	0.3494	0.0391293	Left	Forewing	ups	wet	87.8171	0.2328	0.5112	0.0365134	NA	NA	NA	NA	105	0.206318
1612	moore	28-23-20	Ghana	2	Temp_23.1	Temp_1	28 C	75 % RH	CY	male	18	9	0.3494	0.0391293	Right	Hindwing	uns	wet	85.2891	1.85685	5.56335	0.0571417	NA	NA	NA	NA	105	0.238701
262	moore	28-23-22	Ghana	2	Temp_23.1	Temp_1	28 C	75 % RH	CY	female	19	8	0.3311	0.036411	Right	Forewing	uns	wet	99.1242	0.42255	1.2803	0.0436631	NA	NA	NA	NA	105	0.214759
1282	moore	28-23-22	Ghana	2	Temp_23.1	Temp_1	28 C	75 % RH	CY	female	19	8	0.3311	0.036411	Right	Hindwing	uns	wet	96.5517	2.54115	8.25065	0.0999508	NA	NA	NA	NA	105	0.315986
424	moore	28-29-01	Ghana	2	Temp_29.1	Temp_1	28 C	75 % RH	CY	male	14	6	0.3967	0.0524839	Right	Forewing	uns	wet	96.1869	0.1753	0.5585	0.0374594	NA	NA	NA	NA	107	0.193544
1589	moore	28-29-01	Ghana	2	Temp_29.1	Temp_1	28 C	75 % RH	CY	male	14	6	0.3967	0.0524839	Left	Hindwing	ups	wet	92.2431	2.0472	6.5882	0.0621524	NA	NA	NA	NA	107	0.249238
260	moore	28-29-02	Ghana	2	Temp_29.1	Temp_1	28 C	75 % RH	CY	male	14	6	0.42	0.0534919	Right	Forewing	uns	wet	104.084	0.24795	0.31825	0.045206	NA	NA	NA	NA	107	0.212799
1320	moore	28-29-02	Ghana	2	Temp_29.1	Temp_1	28 C	75 % RH	CY	male	14	6	0.42	0.0534919	Left	Hindwing	ups	wet	104.541	1.78955	6.33505	0.081238	NA	NA	NA	NA	107	0.290894
168	moore	28-29-03	Ghana	2	Temp_29.1	Temp_1	28 C	75 % RH	CY	male	14	6	0.3912	0.0522402	Right	Forewing	uns	wet	90.9514	0.1923	0.39705	0.064191	NA	NA	NA	NA	107	0.255429
1286	moore	28-29-03	Ghana	2	Temp_29.1	Temp_1	28 C	75 % RH	CY	male	14	6	0.3912	0.0522402	Right	Hindwing	uns	wet	82.2632	2.3653	6.8052	0.109019	NA	NA	NA	NA	107	0.330707
249	moore	28-29-04	Ghana	2	Temp_29.1	Temp_1	28 C	75 % RH	CY	male	14	6	0.4463	0.054586	Right	Forewing	uns	wet	107.199	0.11795	0.01891	0.0387594	NA	NA	NA	NA	107	0.194208
1450	moore	28-29-04	Ghana	2	Temp_29.1	Temp_1	28 C	75 % RH	CY	male	14	6	0.4463	0.054586	Left	Hindwing	ups	wet	100.524	2.01645	6.26185	0.0620862	NA	NA	NA	NA	107	0.254333
555	moore	28-29-05	Ghana	2	Temp_29.1	Temp_1	28 C	75 % RH	CY	male	14	6	0.4737	0.0556809	Right	Forewing	uns	wet	113.335	0.2815	0.6687	0.0211463	NA	NA	NA	NA	107	0.145418
1630	moore	28-29-05	Ghana	2	Temp_29.1	Temp_1	28 C	75 % RH	CY	male	14	6	0.4737	0.0556809	Right	Hindwing	uns	wet	113.436	2.63665	8.62525	0.0393779	NA	NA	NA	NA	107	0.201843
[truncated: 355 more rows]

## Sheet: ReadMe
Column name	meaning
dat_id	unique data ID number
Author	person who collected the observation (Elizbeth Moore, Sridhar Halali, or Freerk Molleman)
Ind	Name of the individual butterfly
pop	Population of origin
gen	Generation in captivity
sleeve	name of the sleeve
expt	name of the experiment
Temp	Rearing temperature
Humidity	Rearing Relative Humidity
plant	Host plant species on which the individual was reared
sex	whether it was a male or a female
larv_time	time between egg-hatching and pupation
pup_time	time between pupation and adult eclosion
pup_mss	mass of the pupa (grams)
grwth_rate	growth rate calculated as (pupal mass)1/3 / (larval development time)
quirality	left or right wing
wingtype	front- or hind-wing
Side	upper (dorsal) or under (ventral) side of the wing
phenotype	Categorized as dry or wet season phenotype
WA	wing area proxie
TAsm	small wing tip area (not used in analyses)
TAlg	large wing tip area (used in analyses)
ES	Eyespot area
cat_eyesp	categorized eyespot size (for those without images)
mn_cat_eyesp	mean categorized eyespot
cat_wingshape	categorized wing shape
cat_irror	categorized wing background coloration (wet season forms are strongly irrorated, dry more evenly colored)
hatched_date	date of egg hatching
sqrtES	square root of relative eyespot size
