# Supplementary material for: Larval growth rate is not a major determinant of adult wing shape and eyespot size in the seasonally polyphenic butterfly Melanitis leda
Source: PeerJ journal article supplement (doi:10.7717/peerj.18295), 2024-10-16
Supplement: Mleda_PP_ForewingAveraged_CleanedIncNonSexed.xlsx [file Mleda_PP_ForewingAveraged_CleanedIncNonSexed.xlsx]

## Sheet: Mleda_PP_ForewingAveraged_Clean
dat_id	Author	Ind	pop	gen	sleeve	expt	Temp	Humidity	plant	sex	larv_time	pup_time	pup_mss	grwth_rate	quirality	wingtype	Side	phenotype	WA	TAsm	TAlg	ES	cat_eyesp	mn_cat_eyesp	cat_wingshape	cat_irror	hatched_date	sqrtES
2903	hallow	1_18_85	India	1	hallow_1	Temp_HR	18 C	85 % RH	Z. m. y	male	31	24	0.4124	0.0240111	Right	Forewing	uns	dry	NA	NA	NA	NA	NA	NA	NA	NA	NA	NA
2913	hallow	10_18_85	India	1	hallow_2	Temp_HR	18 C	85 % RH	Z. m. y	male	42	NA	0.4698	0.0185092	Right	Forewing	uns	dry	NA	NA	NA	NA	NA	NA	NA	NA	NA	NA
2923	hallow	11_18_85	India	1	hallow_2	Temp_HR	18 C	85 % RH	Z. m. y	male	42	28	0.3613	0.016958	Right	Forewing	uns	dry	137.044	NA	6.344	0.00336899	NA	NA	NA	NA	NA	0.058043
2933	hallow	12_18_85	India	1	hallow_14	Temp_HR	18 C	85 % RH	Z. m. y	male	40	17	0.4228	0.0187637	Right	Forewing	uns	dry	144.573	NA	5.1868	0.00842549	NA	NA	NA	NA	NA	0.0917905
2943	hallow	13_18_85	India	1	hallow_14	Temp_HR	18 C	85 % RH	Z. m. y	female	40	17	0.4482	0.0191322	Right	Forewing	uns	dry	136.977	NA	5.7215	0.004949	NA	NA	NA	NA	NA	0.0703491
2953	hallow	14_18_85	India	1	hallow_14	Temp_HR	18 C	85 % RH	Z. m. y	male	41	16	0.4708	0.0189741	Right	Forewing	uns	dry	147.143	NA	4.2014	0.00745536	NA	NA	NA	NA	NA	0.0863444
2963	hallow	15_18_85	India	1	hallow_14	Temp_HR	18 C	85 % RH	Z. m. y	female	43	17	0.3669	0.0166487	Right	Forewing	uns	dry	NA	NA	NA	NA	NA	NA	NA	NA	NA	NA
2973	hallow	16_18_85	India	1	hallow_14	Temp_HR	18 C	85 % RH	Z. m. y	male	44	13	0.4309	0.0171661	Right	Forewing	uns	int	134.075	NA	2.4098	0.0142204	NA	NA	NA	NA	NA	0.119249
2981	hallow	17_18_85	India	1	hallow_14	Temp_HR	18 C	85 % RH	Z. m. y	female	44	17	0.4513	0.0174329	Right	Forewing	uns	dry	148.948	NA	6.0112	0.00284462	NA	NA	NA	NA	NA	0.053335
2991	hallow	18_18_85	India	1	hallow_19	Temp_HR	18 C	85 % RH	Z. m. y	male	41	16	0.4661	0.0189108	Right	Forewing	uns	dry	154.144	NA	4.8073	0.00253399	NA	NA	NA	NA	NA	0.0503388
3001	hallow	19_18_85	India	1	hallow_19	Temp_HR	18 C	85 % RH	Z. m. y	male	42	15	0.4078	0.0176563	Right	Forewing	uns	dry	127.823	NA	5.554	0.00397738	NA	NA	NA	NA	NA	0.0630665
3011	hallow	2_18_85	India	1	hallow_1	Temp_HR	18 C	85 % RH	Z. m. y	male	31	20	0.3929	0.0236265	Right	Forewing	NA	wet	130.731	NA	3.7655	0.00799201	NA	NA	NA	NA	NA	0.089398
3021	hallow	20_18_85	India	1	hallow_19	Temp_HR	18 C	85 % RH	Z. m. y	female	44	NA	0.4713	0.0176867	Right	Forewing	NA	dry	138.594	NA	5.4924	0.00227354	NA	NA	NA	NA	NA	0.0476817
3031	hallow	21_18_85	India	1	hallow_19	Temp_HR	18 C	85 % RH	Z. m. y	female	44	14	0.4725	0.0177017	Right	Forewing	NA	dry	133.771	NA	6.1254	0.00612765	NA	NA	NA	NA	NA	0.0782793
3041	hallow	22_18_85	India	1	hallow_19	Temp_HR	18 C	85 % RH	Z. m. y	female	44	NA	0.4274	0.0171195	Right	Forewing	NA	NA	NA	NA	NA	NA	NA	NA	NA	NA	NA	NA
3051	hallow	23_18_85	India	1	hallow_14	Temp_HR	18 C	85 % RH	Z. m. y	female	49	12	0.4185	0.0152652	Right	Forewing	NA	dry	NA	NA	NA	NA	NA	NA	NA	NA	NA	NA
3105	hallow	3_18_85	India	1	hallow_1	Temp_HR	18 C	85 % RH	Z. m. y	female	37	18	0.4504	0.0207172	Right	Forewing	NA	dry	149.574	NA	6.1207	0.00280932	NA	NA	NA	NA	NA	0.053003
3167	hallow	4_18_85	India	1	hallow_1	Temp_HR	18 C	85 % RH	Z. m. y	female	37	19	0.4962	0.0213969	Right	Forewing	NA	dry	163.252	NA	6.1367	0	NA	NA	NA	NA	NA	0
3225	hallow	6_18_85	India	1	hallow_2	Temp_HR	18 C	85 % RH	Z. m. y	female	37	18	0.4692	0.0210015	Right	Forewing	NA	dry	159.659	NA	7.3316	0.00479897	NA	NA	NA	NA	NA	0.0692746
3241	hallow	7_18_85	India	1	hallow_2	Temp_HR	18 C	85 % RH	Z. m. y	female	37	19	0.4595	0.0208558	Right	Forewing	NA	dry	152.361	NA	5.2039	0.00714157	NA	NA	NA	NA	NA	0.0845078
3251	hallow	8_18_85	India	1	hallow_2	Temp_HR	18 C	85 % RH	Z. m. y	male	42	17	0.407	0.0176448	Right	Forewing	NA	dry	163.171	NA	5.5081	0.00385178	NA	NA	NA	NA	NA	0.0620627
3259	hallow	9_18_85	India	1	hallow_2	Temp_HR	18 C	85 % RH	Z. m. y	female	42	18	0.4778	0.0186137	Right	Forewing	NA	dry	NA	NA	NA	NA	NA	NA	NA	NA	NA	NA
637	moore	19-01-01	Ghana	2	Temp_1.1	Temp_1	19 C	75 % RH	Z. m. y	male	38	18	0.5653	0.0217592	Right	Forewing	uns	dry	146.318	0.9654	4.16505	0.00452201	NA	NA	NA	NA	100	0.0672459
630	moore	19-01-02	Ghana	2	Temp_1.1	Temp_1	19 C	75 % RH	Z. m. y	female	39	17	0.5075	0.0204525	Right	Forewing	uns	dry	148.961	1.35145	5.6408	0.00571408	NA	NA	NA	NA	100	0.0755915
812	moore	19-01-03	Ghana	2	Temp_1.1	Temp_1	19 C	75 % RH	Z. m. y	male	43	17	0.672	0.0203699	Right	Forewing	uns	dry	163.365	1.04645	3.90835	0.00319141	NA	NA	NA	NA	100	0.0564926
872	moore	19-02-02	Ghana	2	Temp_2.1	Temp_1	19 C	75 % RH	Z. m. y	male	37	16	0.4507	0.0207218	Left	Forewing	ups	dry	128.258	0.78985	3.1803	0.00394668	NA	NA	NA	NA	99	0.0628226
671	moore	19-02-03	Ghana	2	Temp_2.1	Temp_1	19 C	75 % RH	Z. m. y	female	37	17	0.5577	0.0222467	Right	Forewing	uns	dry	155.197	1.6251	6.0863	0.00453663	NA	NA	NA	NA	99	0.0673545
936	moore	19-02-04	Ghana	2	Temp_2.1	Temp_1	19 C	75 % RH	Z. m. y	female	38	17	0.5142	0.0210827	Left	Forewing	ups	dry	130.26	1.0156	4.35975	0.00315556	NA	NA	NA	NA	99	0.0561743
806	moore	19-02-05	Ghana	2	Temp_2.1	Temp_1	19 C	75 % RH	Z. m. y	male	40	17	0.5069	0.0199334	Right	Forewing	uns	dry	143.989	1.18135	4.2212	0.00221459	NA	NA	NA	NA	99	0.0470594
869	moore	19-02-07	Ghana	2	Temp_2.1	Temp_1	19 C	75 % RH	Z. m. y	male	39	17	0.4584	0.0197705	Right	Forewing	uns	dry	123.132	0.99535	3.78335	0.00319517	NA	NA	NA	NA	99	0.0565258
861	moore	19-02-08	Ghana	2	Temp_2.1	Temp_1	19 C	75 % RH	Z. m. y	female	40	16	0.4383	0.0189902	Right	Forewing	uns	dry	141.172	1.31595	4.8829	0.00313697	NA	NA	NA	NA	99	0.0560087
933	moore	19-02-09	Ghana	2	Temp_2.1	Temp_1	19 C	75 % RH	Z. m. y	male	40	17	0.5105	0.0199805	Left	Forewing	ups	dry	143.814	1.0978	4.23565	0.00327268	NA	NA	NA	NA	99	0.0572073
885	moore	19-02-10	Ghana	2	Temp_2.1	Temp_1	19 C	75 % RH	Z. m. y	male	40	17	0.5046	0.0199032	Right	Forewing	uns	dry	135.953	0.9965	3.70585	0.00319501	NA	NA	NA	NA	99	0.0565245
893	moore	19-02-11	Ghana	2	Temp_2.1	Temp_1	19 C	75 % RH	Z. m. y	female	41	16	0.5287	0.0197221	Right	Forewing	uns	dry	149.016	1.22015	5.2644	0.00261068	NA	NA	NA	NA	99	0.0510948
930	moore	19-02-12	Ghana	2	Temp_2.1	Temp_1	19 C	75 % RH	Z. m. y	female	41	16	0.423	0.0183089	Right	Forewing	uns	dry	133.017	1.1676	4.66565	0.00260778	NA	NA	NA	NA	99	0.0510664
815	moore	19-02-14	Ghana	2	Temp_2.1	Temp_1	19 C	75 % RH	Z. m. y	male	41	18	0.5054	0.019428	Right	Forewing	uns	dry	147.274	0.9609	3.76015	0.00351722	NA	NA	NA	NA	99	0.0593061
975	moore	19-02-15	Ghana	2	Temp_2.1	Temp_1	19 C	75 % RH	Z. m. y	female	41	16	0.43	0.0184094	Right	Forewing	uns	dry	140.624	1.1715	4.8001	0.00187157	NA	NA	NA	NA	99	0.0432617
883	moore	19-02-16	Ghana	2	Temp_2.1	Temp_1	19 C	75 % RH	Z. m. y	male	42	17	0.5101	0.019024	Left	Forewing	ups	dry	150.769	1.37365	5.06965	0.00282406	NA	NA	NA	NA	99	0.0531418
836	moore	19-02-17	Ghana	2	Temp_2.1	Temp_1	19 C	75 % RH	Z. m. y	female	42	17	0.4575	0.0183463	Right	Forewing	uns	dry	147.38	1.3991	5.42245	0.00311446	NA	NA	NA	NA	99	0.0558074
942	moore	19-02-18	Ghana	2	Temp_2.1	Temp_1	19 C	75 % RH	Z. m. y	female	42	17	0.3897	0.0173911	Left	Forewing	ups	dry	110.995	1.17005	4.40905	0.00261728	NA	NA	NA	NA	99	0.0511594
629	moore	19-02-19	Ghana	2	Temp_2.1	Temp_1	19 C	75 % RH	Z. m. y	female	43	16	0.4463	0.0177722	Right	Forewing	uns	dry	143.494	1.76255	6.5033	0.00549523	NA	NA	NA	NA	99	0.0741298
830	moore	19-02-20	Ghana	2	Temp_2.1	Temp_1	19 C	75 % RH	Z. m. y	NA	43	16	0.5111	0.0185937	Left	Forewing	ups	dry	155.525	1.5483	5.58015	0.00364355	NA	NA	NA	NA	99	0.0603618
747	moore	19-02-21	Ghana	2	Temp_2.1	Temp_1	19 C	75 % RH	Z. m. y	female	46	16	0.4355	0.016478	Right	Forewing	uns	dry	131.103	1.1693	4.8191	0.00426789	NA	NA	NA	NA	99	0.0653291
977	moore	19-02-23	Ghana	2	Temp_2.1	Temp_1	19 C	75 % RH	Z. m. y	female	48	18	0.4483	0.0159447	Left	Forewing	ups	dry	136.652	1.48235	5.8295	0.00217616	NA	NA	NA	NA	99	0.0466493
898	moore	19-08-01	Ghana	2	moore_8.1	Temp_1	19 C	75 % RH	Z. m. y	male	39	16	0.5891	0.0214947	Left	Forewing	ups	dry	158.097	1.23895	4.495	0.00314688	NA	NA	NA	NA	103	0.0560971
677	moore	19-08-02	Ghana	2	moore_8.1	Temp_1	19 C	75 % RH	Z. m. y	female	40	15	0.5062	0.0199242	Left	Forewing	ups	dry	154.281	1.1433	4.497	0.004968	NA	NA	NA	NA	103	0.070484
724	moore	19-08-03	Ghana	2	moore_8.1	Temp_1	19 C	75 % RH	Z. m. y	male	42	16	0.531	0.0192804	Left	Forewing	ups	dry	148.919	1.3275	4.8595	0.00415026	NA	NA	NA	NA	103	0.0644225
906	moore	19-08-04	Ghana	2	moore_8.1	Temp_1	19 C	75 % RH	Z. m. y	male	43	15	0.5441	0.0189856	Right	Forewing	uns	dry	141.387	1.0815	4.1322	0.00266901	NA	NA	NA	NA	103	0.0516625
944	moore	19-08-05	Ghana	2	moore_8.1	Temp_1	19 C	75 % RH	Z. m. y	male	43	16	0.5578	0.0191436	Left	Forewing	ups	dry	164.44	1.29285	4.963	0.00289019	NA	NA	NA	NA	103	0.0537605
632	moore	19-08-06	Ghana	2	moore_8.1	Temp_1	19 C	75 % RH	Z. m. y	female	43	16	0.5151	0.0186421	Right	Forewing	uns	dry	144.604	1.4224	6.5346	0.00653339	NA	NA	NA	NA	103	0.0808294
789	moore	19-08-07	Ghana	2	moore_8.1	Temp_1	19 C	75 % RH	Z. m. y	male	44	17	0.6173	0.0193514	Left	Forewing	ups	dry	170.79	1.3452	5.2034	0.00313227	NA	NA	NA	NA	103	0.0559667
817	moore	19-08-08	Ghana	2	moore_8.1	Temp_1	19 C	75 % RH	Z. m. y	male	46	17	0.5177	0.0174556	Right	Forewing	uns	dry	137.628	1.18255	4.5952	0.00436058	NA	NA	NA	NA	103	0.0660347
743	moore	19-08-09	Ghana	2	moore_8.1	Temp_1	19 C	75 % RH	Z. m. y	male	46	17	0.5716	0.0180415	Right	Forewing	uns	dry	150.47	1.1521	4.24785	0.00213939	NA	NA	NA	NA	103	0.0462536
697	moore	19-08-11	Ghana	2	moore_8.1	Temp_1	19 C	75 % RH	Z. m. y	female	49	17	0.389	0.0148977	Right	Forewing	uns	dry	123.596	1.1844	5.00395	0.0060466	NA	NA	NA	NA	103	0.0777599
888	moore	19-08-12	Ghana	2	moore_8.1	Temp_1	19 C	75 % RH	Z. m. y	female	49	17	0.5517	0.0167381	Right	Forewing	uns	dry	177.474	1.7443	7.0844	0.00237523	NA	NA	NA	NA	103	0.0487363
847	moore	19-09-01	Ghana	2	moore_9.1	Temp_1	19 C	75 % RH	Z. m. y	female	38	17	0.5979	0.0221697	Left	Forewing	ups	dry	158.811	1.0126	4.5046	0.0033065	NA	NA	NA	NA	103	0.0575022
921	moore	19-09-02	Ghana	2	moore_9.1	Temp_1	19 C	75 % RH	Z. m. y	male	38	17	0.517	0.0211209	Right	Forewing	uns	dry	145.599	0.9542	3.1077	0.00269133	NA	NA	NA	NA	103	0.0518781
979	moore	19-09-03	Ghana	2	moore_9.1	Temp_1	19 C	75 % RH	Z. m. y	male	39	16	0.4954	0.0202887	Left	Forewing	ups	dry	137.669	1.16545	4.34085	0.00141863	NA	NA	NA	NA	103	0.0376647
811	moore	19-09-04	Ghana	2	moore_9.1	Temp_1	19 C	75 % RH	Z. m. y	male	39	16	0.6084	0.0217269	Right	Forewing	uns	dry	150.988	1.26625	4.4731	0.00259637	NA	NA	NA	NA	103	0.0509546
890	moore	19-09-05	Ghana	2	moore_9.1	Temp_1	19 C	75 % RH	Z. m. y	male	38	17	0.4932	0.0207917	Left	Forewing	ups	dry	137.499	1.0377	3.68725	0.00199903	NA	NA	NA	NA	103	0.0447105
877	moore	19-09-06	Ghana	2	moore_9.1	Temp_1	19 C	75 % RH	Z. m. y	male	40	18	0.6127	0.0212336	Right	Forewing	uns	dry	163.001	1.0816	3.59845	0.00223764	NA	NA	NA	NA	103	0.0473037
963	moore	19-09-07	Ghana	2	moore_9.1	Temp_1	19 C	75 % RH	Z. m. y	female	42	16	0.5101	0.019024	Left	Forewing	ups	dry	148.811	1.3735	5.6564	0.0022122	NA	NA	NA	NA	103	0.047034
705	moore	19-09-08	Ghana	2	moore_9.1	Temp_1	19 C	75 % RH	Z. m. y	female	43	16	0.4094	0.0172682	Right	Forewing	uns	dry	97.9472	0.8113	3.4239	0.00470487	NA	NA	NA	NA	103	0.0685921
866	moore	19-19-01	Ghana	2	Temp_19.1	Temp_1	19 C	75 % RH	Z. m. y	male	41	17	0.5406	0.0198689	Left	Forewing	ups	dry	146.492	1.14745	4.2304	0.00366906	NA	NA	NA	NA	106	0.0605728
826	moore	19-19-02	Ghana	2	Temp_19.1	Temp_1	19 C	75 % RH	Z. m. y	male	41	17	0.5286	0.0197208	Left	Forewing	ups	dry	152.665	0.99255	3.90395	0.00372331	NA	NA	NA	NA	106	0.0610189
799	moore	19-19-03	Ghana	2	Temp_19.1	Temp_1	19 C	75 % RH	Z. m. y	female	42	16	0.4428	0.0181476	Left	Forewing	ups	dry	157.08	1.419	5.5174	0.00386112	NA	NA	NA	NA	106	0.062138
900	moore	19-19-04	Ghana	2	Temp_19.1	Temp_1	19 C	75 % RH	Z. m. y	female	42	16	0.6346	0.0204606	Right	Forewing	uns	dry	164.862	1.8738	7.5778	0.00287509	NA	NA	NA	NA	106	0.0536199
1024	moore	19-19-05	Ghana	2	Temp_19.1	Temp_1	19 C	75 % RH	Z. m. y	female	44	17	0.5507	0.0186288	Left	Forewing	ups	dry	180.756	1.51925	6.52445	0.000701841	NA	NA	NA	NA	106	0.0264923
1006	moore	19-19-07	Ghana	2	Temp_19.1	Temp_1	19 C	75 % RH	Z. m. y	male	50	18	0.5106	0.0159854	Right	Forewing	uns	dry	145.208	1.4375	5.4698	0.00166142	NA	NA	NA	NA	106	0.0407606
968	moore	19-21-02	Ghana	2	Temp_21.1	Temp_1	19 C	75 % RH	Z. m. y	male	45	18	0.4956	0.0175859	Left	Forewing	ups	dry	144.768	1.24225	5.04345	0.0019958	NA	NA	NA	NA	106	0.0446744
850	moore	19-21-03	Ghana	2	Temp_21.1	Temp_1	19 C	75 % RH	Z. m. y	female	44	17	0.5211	0.0182889	Right	Forewing	uns	dry	154.581	1.49885	6.07995	0.00255496	NA	NA	NA	NA	106	0.0505466
986	moore	19-21-04	Ghana	2	Temp_21.1	Temp_1	19 C	75 % RH	Z. m. y	male	46	17	0.3573	0.015426	Left	Forewing	ups	dry	119.056	1.03385	4.05875	0.00209393	NA	NA	NA	NA	106	0.0457595
994	moore	19-21-07	Ghana	2	Temp_21.1	Temp_1	19 C	75 % RH	Z. m. y	male	46	17	0.4353	0.0164755	Right	Forewing	uns	dry	145.07	1.0239	4.1276	0.00117215	NA	NA	NA	NA	106	0.0342367
991	moore	19-21-08	Ghana	2	Temp_21.1	Temp_1	19 C	75 % RH	Z. m. y	male	45	18	0.5173	0.0178389	Right	Forewing	uns	dry	143.231	1.34205	5.0708	0.00156291	NA	NA	NA	NA	106	0.0395337
992	moore	19-21-09	Ghana	2	Temp_21.1	Temp_1	19 C	75 % RH	Z. m. y	male	46	17	0.489	0.0171269	Left	Forewing	ups	dry	151.203	1.38035	5.3002	0.00150395	NA	NA	NA	NA	106	0.0387808
916	moore	19-21-10	Ghana	2	Temp_21.1	Temp_1	19 C	75 % RH	Z. m. y	female	47	16	0.4375	0.0161521	Right	Forewing	uns	dry	147.2	1.3235	5.5299	0.0028052	NA	NA	NA	NA	106	0.0529641
873	moore	19-21-11	Ghana	2	Temp_21.1	Temp_1	19 C	75 % RH	Z. m. y	male	47	16	0.3784	0.0153893	Left	Forewing	ups	dry	121.445	0.86705	3.64205	0.00312154	NA	NA	NA	NA	106	0.0558707
932	moore	19-21-12	Ghana	2	Temp_21.1	Temp_1	19 C	75 % RH	Z. m. y	female	48	15	0.3984	0.0153296	Left	Forewing	ups	dry	142.1	1.6613	6.2749	0.00212149	NA	NA	NA	NA	106	0.0460596
987	moore	19-21-13	Ghana	2	Temp_21.1	Temp_1	19 C	75 % RH	Z. m. y	female	49	16	NA	NA	Left	Forewing	ups	dry	122.93	0.9847	3.6707	0.00222871	NA	NA	NA	NA	106	0.0472092
777	moore	19-21-14	Ghana	2	Temp_21.1	Temp_1	19 C	75 % RH	Z. m. y	female	54	NA	NA	NA	Right	Forewing	uns	dry	140.162	1.36295	6.0204	0.00496925	NA	NA	NA	NA	106	0.0704929
775	moore	19-26-01	Ghana	2	Temp_26.1	Temp_1	19 C	75 % RH	Z. m. y	female	38	16	0.516	0.0211073	Right	Forewing	uns	dry	148.059	1.2766	5.5056	0.00343409	NA	NA	NA	NA	107	0.0586011
904	moore	19-26-02	Ghana	2	Temp_26.1	Temp_1	19 C	75 % RH	Z. m. y	male	37	17	0.4798	0.0211585	Right	Forewing	uns	dry	140.366	1.0572	4.16775	0.00322518	NA	NA	NA	NA	107	0.0567907
788	moore	19-26-03	Ghana	2	Temp_26.1	Temp_1	19 C	75 % RH	Z. m. y	female	38	16	0.4665	0.0204096	Left	Forewing	ups	dry	155.406	1.5599	6.1133	0.00380253	NA	NA	NA	NA	107	0.0616647
823	moore	19-26-04	Ghana	2	Temp_26.1	Temp_1	19 C	75 % RH	Z. m. y	male	40	15	0.6115	0.0212197	Right	Forewing	uns	dry	165.39	1.2375	4.96155	0.0029046	NA	NA	NA	NA	107	0.0538944
844	moore	19-26-05	Ghana	2	Temp_26.1	Temp_1	19 C	75 % RH	Z. m. y	male	41	18	0.5263	0.0196922	Right	Forewing	uns	dry	150.806	1.16505	4.83635	0.00310285	NA	NA	NA	NA	107	0.0557032
701	moore	19-26-06	Ghana	2	Temp_26.1	Temp_1	19 C	75 % RH	Z. m. y	male	41	17	0.5925	0.0204855	Left	Forewing	ups	dry	167.506	1.4254	4.9752	0.00485892	NA	NA	NA	NA	107	0.0697059
895	moore	19-26-07	Ghana	2	Temp_26.1	Temp_1	19 C	75 % RH	Z. m. y	female	41	16	0.5152	0.0195528	Left	Forewing	ups	dry	159.227	1.78905	7.30925	0.00313608	NA	NA	NA	NA	107	0.0560007
856	moore	19-26-08	Ghana	2	Temp_26.1	Temp_1	19 C	75 % RH	Z. m. y	male	41	16	0.5332	0.0197779	Left	Forewing	ups	dry	149.791	1.17915	4.66515	0.00384497	NA	NA	NA	NA	107	0.0620078
908	moore	19-35-01	Ghana	2	moore_35.1	Temp_1	19 C	75 % RH	Z. m. y	male	38	17	0.4748	0.0205299	Left	Forewing	ups	dry	144.656	1.27355	5.25225	0.00299146	NA	NA	NA	NA	109	0.0546943
679	moore	19-35-02	Ghana	2	moore_35.1	Temp_1	19 C	75 % RH	Z. m. y	female	39	17	0.6547	0.0222647	Left	Forewing	ups	dry	187.584	1.4728	6.05105	0.00279638	NA	NA	NA	NA	109	0.0528808
810	moore	19-35-03	Ghana	2	moore_35.1	Temp_1	19 C	75 % RH	Z. m. y	male	40	18	0.5747	0.0207852	Left	Forewing	ups	dry	170.671	1.2305	4.1514	0.00318973	NA	NA	NA	NA	109	0.0564777
935	moore	19-35-05	Ghana	2	moore_35.1	Temp_1	19 C	75 % RH	Z. m. y	male	41	NA	0.5573	0.0200715	Left	Forewing	ups	dry	144.643	1.20785	4.236	0.00261434	NA	NA	NA	NA	109	0.0511307
1012	moore	19-35-07	Ghana	2	moore_35.1	Temp_1	19 C	75 % RH	Z. m. y	female	47	16	0.4917	0.0167933	Right	Forewing	uns	dry	148.048	1.53205	6.2506	0.000846607	NA	NA	NA	NA	109	0.0290965
981	moore	19-35-08	Ghana	2	moore_35.1	Temp_1	19 C	75 % RH	Z. m. y	female	46	16	0.3731	0.0156501	Left	Forewing	ups	dry	136.184	1.3676	5.4553	0.00215298	NA	NA	NA	NA	109	0.0464002
787	moore	19-43-01	Ghana	2	moore_43.1	Temp_1	19 C	75 % RH	Z. m. y	male	40	18	0.6683	0.0218573	Right	Forewing	uns	dry	185.985	1.644	5.9263	0.00246097	NA	NA	NA	NA	111	0.0496082
782	moore	19-43-02	Ghana	2	moore_43.1	Temp_1	19 C	75 % RH	Z. m. y	male	42	16	0.5217	0.0191672	Left	Forewing	ups	dry	150.455	1.00575	3.95805	0.00404469	NA	NA	NA	NA	111	0.0635979
939	moore	19-43-03	Ghana	2	moore_43.1	Temp_1	19 C	75 % RH	Z. m. y	female	42	16	0.5384	0.0193695	Right	Forewing	uns	dry	163.474	1.1929	5.2971	0.00216783	NA	NA	NA	NA	111	0.0465599
937	moore	19-43-04	Ghana	2	moore_43.1	Temp_1	19 C	75 % RH	Z. m. y	female	43	15	0.588	0.0194831	Left	Forewing	ups	dry	174.885	1.5499	6.4423	0.00223245	NA	NA	NA	NA	111	0.0472488
756	moore	19-43-05	Ghana	2	moore_43.1	Temp_1	19 C	75 % RH	Z. m. y	female	43	17	0.4889	0.0183205	Left	Forewing	ups	dry	144.998	1.23325	5.15935	0.00444378	NA	NA	NA	NA	111	0.0666617
767	moore	19-43-07	Ghana	2	moore_43.1	Temp_1	19 C	75 % RH	Z. m. y	male	43	17	0.63	0.0199363	Left	Forewing	ups	dry	168.866	1.14845	4.4624	0.0032676	NA	NA	NA	NA	111	0.0571629
619	moore	19-43-08	Ghana	2	moore_43.1	Temp_1	19 C	75 % RH	Z. m. y	female	43	17	0.5292	0.0188107	Right	Forewing	uns	dry	146.909	1.39125	5.6526	0.00369508	NA	NA	NA	NA	111	0.0607872
797	moore	19-43-10	Ghana	2	moore_43.1	Temp_1	19 C	75 % RH	Z. m. y	male	43	17	0.6416	0.0200579	Right	Forewing	uns	dry	172.308	1.4543	5.7604	0.00377201	NA	NA	NA	NA	111	0.0614167
903	moore	19-43-11	Ghana	2	moore_43.1	Temp_1	19 C	75 % RH	Z. m. y	male	44	16	0.4781	0.0177713	Right	Forewing	uns	dry	155.287	1.3674	4.5737	0.00245711	NA	NA	NA	NA	111	0.0495693
696	moore	19-43-12	Ghana	2	moore_43.1	Temp_1	19 C	75 % RH	Z. m. y	male	44	16	0.5483	0.0186017	Left	Forewing	ups	dry	160.293	1.41345	5.04475	0.00371898	NA	NA	NA	NA	111	0.0609834
706	moore	19-43-13	Ghana	2	moore_43.1	Temp_1	19 C	75 % RH	Z. m. y	female	45	16	0.5354	0.0180446	Right	Forewing	uns	dry	164.249	1.47705	6.08845	0.00471939	NA	NA	NA	NA	111	0.0686978
704	moore	19-43-15	Ghana	2	moore_43.1	Temp_1	19 C	75 % RH	Z. m. y	female	45	17	0.6271	0.019021	Left	Forewing	ups	dry	182.167	1.40585	5.53105	0.00285722	NA	NA	NA	NA	111	0.053453
997	moore	19-43-16	Ghana	2	moore_43.1	Temp_1	19 C	75 % RH	Z. m. y	female	48	NA	0.393	0.0152601	Right	Forewing	uns	dry	127.22	1.00975	4.08645	0.00157378	NA	NA	NA	NA	111	0.0396709
729	moore	19-43-18	Ghana	2	moore_43.1	Temp_1	19 C	75 % RH	Z. m. y	female	50	NA	0.4709	0.0155599	Left	Forewing	ups	dry	151.351	1.0969	4.9802	0.00397309	NA	NA	NA	NA	111	0.0630325
2905	hallow	1_21_55	India	1	hallow_3	Temp_HR	21 C	55 % RH	Z. m. y	female	26	13	0.4368	0.0291824	Right	Forewing	uns	dry	142.463	NA	4.8256	0.0164274	NA	NA	NA	NA	NA	0.12817
2915	hallow	10_21_55	India	1	hallow_4	Temp_HR	21 C	55 % RH	Z. m. y	female	26	12	0.5022	0.0305717	Right	Forewing	uns	dry	153.228	NA	6.2254	0.0180098	NA	NA	NA	NA	NA	0.134201
2925	hallow	11_21_55	India	1	hallow_4	Temp_HR	21 C	55 % RH	Z. m. y	male	26	13	0.4668	0.0298357	Right	Forewing	uns	dry	126.098	NA	3.9958	0.0149788	NA	NA	NA	NA	NA	0.122388
2935	hallow	12_21_55	India	1	hallow_4	Temp_HR	21 C	55 % RH	Z. m. y	male	30	10	0.5055	0.0265533	Right	Forewing	uns	dry	155.917	NA	5.2431	0.00596919	NA	NA	NA	NA	NA	0.0772605
2945	hallow	13_21_55	India	1	hallow_4	Temp_HR	21 C	55 % RH	Z. m. y	male	35	13	0.4613	0.0220763	Right	Forewing	uns	dry	134.137	NA	5.2651	0.00412414	NA	NA	NA	NA	NA	0.0642194
2955	hallow	14_21_55	India	1	hallow_4	Temp_HR	21 C	55 % RH	Z. m. y	female	33	9	0.4389	0.023029	Right	Forewing	uns	dry	142.904	NA	5.1055	0.00432177	NA	NA	NA	NA	NA	0.0657402
2965	hallow	15_21_55	India	1	hallow_4	Temp_HR	21 C	55 % RH	Z. m. y	male	33	12	0.4569	0.0233396	Right	Forewing	uns	dry	143.795	NA	6.1845	0.0052123	NA	NA	NA	NA	NA	0.0721962
2983	hallow	17_21_55	India	1	hallow_3	Temp_HR	21 C	55 % RH	Z. m. y	female	35	13	0.3745	0.0205944	Right	Forewing	uns	dry	139.156	NA	5.2846	0.0030685	NA	NA	NA	NA	NA	0.0553941
2993	hallow	18_21_55	India	1	hallow_11	Temp_HR	21 C	55 % RH	Z. m. y	female	25	NA	0.4107	0.0297327	Right	Forewing	uns	dry	NA	NA	NA	NA	NA	NA	NA	NA	NA	NA
3003	hallow	19_21_55	India	1	hallow_11	Temp_HR	21 C	55 % RH	Z. m. y	female	25	11	0.3875	0.029162	Right	Forewing	uns	wet	141.099	NA	5.0126	0.0143211	NA	NA	NA	NA	NA	0.119671
3013	hallow	2_21_55	India	1	hallow_3	Temp_HR	21 C	55 % RH	Z. m. y	male	26	13	0.4267	0.0289557	Right	Forewing	NA	dry	136.701	NA	4.6402	0.00776149	NA	NA	NA	NA	NA	0.0880993
3023	hallow	20_21_55	India	1	hallow_11	Temp_HR	21 C	55 % RH	Z. m. y	male	25	10	0.3705	0.0287291	Right	Forewing	NA	wet	109.001	NA	3.3137	0.0319226	NA	NA	NA	NA	NA	0.178669
3033	hallow	21_21_55	India	1	hallow_3	Temp_HR	21 C	55 % RH	Z. m. y	male	37	13	0.3905	0.0197548	Right	Forewing	NA	dry	136.302	NA	7.9064	0.00547975	NA	NA	NA	NA	NA	0.0740253
3043	hallow	22_21_55	India	1	hallow_11	Temp_HR	21 C	55 % RH	Z. m. y	male	37	NA	0.4502	0.0207141	Right	Forewing	NA	NA	NA	NA	NA	NA	NA	NA	NA	NA	NA	NA
3053	hallow	23_21_55	India	1	hallow_11	Temp_HR	21 C	55 % RH	Z. m. y	male	27	NA	0.2928	0.0245939	Right	Forewing	NA	NA	NA	NA	NA	NA	NA	NA	NA	NA	NA	NA
3061	hallow	24_21_55	India	1	hallow_11	Temp_HR	21 C	55 % RH	Z. m. y	female	27	12	0.4251	0.0278484	Right	Forewing	NA	NA	NA	NA	NA	NA	NA	NA	NA	NA	NA	NA
3069	hallow	25_21_55	India	1	hallow_11	Temp_HR	21 C	55 % RH	Z. m. y	female	27	10	0.403	0.0273572	Right	Forewing	NA	dry	NA	NA	NA	NA	NA	NA	NA	NA	NA	NA
3077	hallow	26_21_55	India	1	hallow_11	Temp_HR	21 C	55 % RH	Z. m. y	male	27	12	0.412	0.0275593	Right	Forewing	NA	dry	130.405	NA	3.393	0.0043572	NA	NA	NA	NA	NA	0.0660091
3085	hallow	27_21_55	India	1	hallow_11	Temp_HR	21 C	55 % RH	Z. m. y	female	27	10	0.3277	0.0255346	Right	Forewing	NA	wet	NA	NA	NA	NA	NA	NA	NA	NA	NA	NA
3093	hallow	28_21_55	India	1	hallow_18	Temp_HR	21 C	55 % RH	Z. m. y	male	24	NA	0.2625	0.0266787	Right	Forewing	NA	NA	NA	NA	NA	NA	NA	NA	NA	NA	NA	NA
3099	hallow	29_21_55	India	1	hallow_18	Temp_HR	21 C	55 % RH	Z. m. y	male	24	NA	0.3813	0.0302142	Right	Forewing	NA	NA	NA	NA	NA	NA	NA	NA	NA	NA	NA	NA
3107	hallow	3_21_55	India	1	hallow_3	Temp_HR	21 C	55 % RH	Z. m. y	male	26	13	0.3918	0.0281437	Right	Forewing	NA	dry	125.111	NA	3.2881	0.00973614	NA	NA	NA	NA	NA	0.0986719
3115	hallow	30_21_55	India	1	hallow_18	Temp_HR	21 C	55 % RH	Z. m. y	male	24	NA	0.3452	0.0292289	Right	Forewing	NA	NA	NA	NA	NA	NA	NA	NA	NA	NA	NA	NA
3121	hallow	31_21_55	India	1	hallow_11	Temp_HR	21 C	55 % RH	Z. m. y	female	27	NA	0.3609	0.0263693	Right	Forewing	NA	NA	NA	NA	NA	NA	NA	NA	NA	NA	NA	NA
3127	hallow	32_21_55	India	1	hallow_18	Temp_HR	21 C	55 % RH	Z. m. y	male	24	14	0.3646	0.0297665	Right	Forewing	NA	wet	107.436	NA	1.6374	0.0221509	NA	NA	NA	NA	NA	0.148832
3133	hallow	33_21_55	India	1	hallow_18	Temp_HR	21 C	55 % RH	Z. m. y	male	24	14	0.3547	0.0294946	Right	Forewing	NA	wet	101.982	NA	1.2911	0.026232	NA	NA	NA	NA	NA	0.161963
3139	hallow	34_21_55	India	1	hallow_18	Temp_HR	21 C	55 % RH	Z. m. y	female	24	14	0.3963	0.0306053	Right	Forewing	NA	wet	133.98	NA	2.5731	0.018973	NA	NA	NA	NA	NA	0.137742
3145	hallow	35_21_55	India	1	hallow_11	Temp_HR	21 C	55 % RH	Z. m. y	male	27	14	0.3231	0.0254145	Right	Forewing	NA	dry	117.273	NA	2.3322	0.0117504	NA	NA	NA	NA	NA	0.108399
3151	hallow	36_21_55	India	1	hallow_18	Temp_HR	21 C	55 % RH	Z. m. y	female	30	9	0.3418	0.0233061	Right	Forewing	NA	wet	NA	NA	NA	NA	NA	NA	NA	NA	NA	NA
3155	hallow	37_21_55	India	1	hallow_18	Temp_HR	21 C	55 % RH	Z. m. y	male	30	10	0.3167	0.022721	Right	Forewing	NA	NA	111.105	NA	2.849	0.0164791	NA	NA	NA	NA	NA	0.128371
3159	hallow	38_21_55	India	1	hallow_18	Temp_HR	21 C	55 % RH	Z. m. y	male	30	10	0.3525	0.0235468	Right	Forewing	NA	NA	NA	NA	NA	NA	NA	NA	NA	NA	NA	NA
3163	hallow	39_21_55	India	1	hallow_18	Temp_HR	21 C	55 % RH	Z. m. y	male	30	10	0.3525	0.0235468	Right	Forewing	NA	NA	NA	NA	NA	NA	NA	NA	NA	NA	NA	NA
3169	hallow	4_21_55	India	1	hallow_3	Temp_HR	21 C	55 % RH	Z. m. y	female	26	12	0.3585	0.0273227	Right	Forewing	NA	dry	120.709	NA	2.8911	0.0164213	NA	NA	NA	NA	NA	0.128146
3197	hallow	5_21_55	India	1	hallow_4	Temp_HR	21 C	55 % RH	Z. m. y	female	24	15	0.4432	0.0317679	Right	Forewing	NA	dry	150.986	NA	4.8561	0.00702779	NA	NA	NA	NA	NA	0.0838319
3227	hallow	6_21_55	India	1	hallow_3	Temp_HR	21 C	55 % RH	Z. m. y	female	27	13	0.466	0.0287143	Right	Forewing	NA	dry	154.363	NA	6.6109	0.00813149	NA	NA	NA	NA	NA	0.0901748
3243	hallow	7_21_55	India	1	hallow_3	Temp_HR	21 C	55 % RH	Z. m. y	male	27	11	0.4004	0.0272982	Right	Forewing	NA	dry	126.89	NA	4.1019	0.00627156	NA	NA	NA	NA	NA	0.0791932
3261	hallow	9_21_55	India	1	hallow_4	Temp_HR	21 C	55 % RH	Z. m. y	female	26	11	0.4952	0.0304289	Right	Forewing	NA	wet	145.723	NA	3.7327	0.0183842	NA	NA	NA	NA	NA	0.135588
3273	hallow	11_21_85	India	unk	NA	Temp_HR	21 C	85 % RH	Z. m. y	NA	NA	NA	NA	NA	Right	Forewing	uns	NA	103.692	NA	1.1231	0.0416685	NA	NA	NA	NA	NA	0.204129
3279	hallow	13_21_85	India	unk	NA	Temp_HR	21 C	85 % RH	Z. m. y	NA	NA	NA	NA	NA	Right	Forewing	uns	NA	122.705	NA	1.6439	0.0664283	NA	NA	NA	NA	NA	0.257737
3281	hallow	14_21_85	India	unk	NA	Temp_HR	21 C	85 % RH	Z. m. y	NA	NA	NA	NA	NA	Right	Forewing	uns	NA	99.4857	NA	1.6822	0.0548772	NA	NA	NA	NA	NA	0.234259
3285	hallow	15_21_85	India	unk	NA	Temp_HR	21 C	85 % RH	Z. m. y	NA	NA	NA	NA	NA	Right	Forewing	uns	NA	91.7101	NA	0.9952	0.0397066	NA	NA	NA	NA	NA	0.199265
3289	hallow	16_21_85	India	unk	NA	Temp_HR	21 C	85 % RH	Z. m. y	NA	NA	NA	NA	NA	Right	Forewing	uns	NA	99.4474	NA	1.2102	0.0474351	NA	NA	NA	NA	NA	0.217796
3293	hallow	17_21_85	India	unk	NA	Temp_HR	21 C	85 % RH	Z. m. y	NA	NA	NA	NA	NA	Right	Forewing	uns	NA	103.15	NA	0.5058	0.0363353	NA	NA	NA	NA	NA	0.190618
3297	hallow	18_21_85	India	unk	NA	Temp_HR	21 C	85 % RH	Z. m. y	NA	NA	NA	NA	NA	Right	Forewing	uns	NA	114.579	NA	1.7515	0.0307719	NA	NA	NA	NA	NA	0.175419
3301	hallow	19_21_85	India	unk	NA	Temp_HR	21 C	85 % RH	Z. m. y	NA	NA	NA	NA	NA	Right	Forewing	uns	NA	103.368	NA	2.0677	0.0515623	NA	NA	NA	NA	NA	0.227073
3305	hallow	2_21_85	India	unk	NA	Temp_HR	21 C	85 % RH	Z. m. y	NA	NA	NA	NA	NA	Right	Forewing	NA	NA	123.441	NA	1.824	0.0663151	NA	NA	NA	NA	NA	0.257517
3309	hallow	20_21_85	India	unk	NA	Temp_HR	21 C	85 % RH	Z. m. y	NA	NA	NA	NA	NA	Right	Forewing	NA	NA	113.333	NA	2.6406	0.0405027	NA	NA	NA	NA	NA	0.201253
3311	hallow	21_21_85	India	unk	NA	Temp_HR	21 C	85 % RH	Z. m. y	NA	NA	NA	NA	NA	Right	Forewing	NA	NA	112.427	NA	2.0781	0.038182	NA	NA	NA	NA	NA	0.195402
3313	hallow	22_21_85	India	unk	NA	Temp_HR	21 C	85 % RH	Z. m. y	NA	NA	NA	NA	NA	Right	Forewing	NA	NA	113.657	NA	1.5542	0.0325189	NA	NA	NA	NA	NA	0.18033
3315	hallow	23_21_85	India	unk	NA	Temp_HR	21 C	85 % RH	Z. m. y	NA	NA	NA	NA	NA	Right	Forewing	NA	NA	112.866	NA	2.3929	0.0282841	NA	NA	NA	NA	NA	0.168179
3319	hallow	24_21_85	India	unk	NA	Temp_HR	21 C	85 % RH	Z. m. y	NA	NA	NA	NA	NA	Right	Forewing	NA	NA	127.527	NA	3.6257	0.0180652	NA	NA	NA	NA	NA	0.134407
3321	hallow	25_21_85	India	unk	NA	Temp_HR	21 C	85 % RH	Z. m. y	NA	NA	NA	NA	NA	Right	Forewing	NA	NA	107.472	NA	1.2061	0.0483008	NA	NA	NA	NA	NA	0.219774
3325	hallow	26_21_85	India	unk	NA	Temp_HR	21 C	85 % RH	Z. m. y	NA	NA	NA	NA	NA	Right	Forewing	NA	NA	123.59	NA	2.0554	0.0214347	NA	NA	NA	NA	NA	0.146406
3329	hallow	27_21_85	India	unk	NA	Temp_HR	21 C	85 % RH	Z. m. y	NA	NA	NA	NA	NA	Right	Forewing	NA	NA	111.14	NA	1.4955	0.0491463	NA	NA	NA	NA	NA	0.22169
3337	hallow	3_21_85	India	unk	NA	Temp_HR	21 C	85 % RH	Z. m. y	NA	NA	NA	NA	NA	Right	Forewing	NA	NA	112.641	NA	1.3833	0.0539278	NA	NA	NA	NA	NA	0.232224
3351	hallow	4_21_85	India	unk	NA	Temp_HR	21 C	85 % RH	Z. m. y	NA	NA	NA	NA	NA	Right	Forewing	NA	NA	104.65	NA	2.4853	0.0084568	NA	NA	NA	NA	NA	0.0919609
3353	hallow	5_21_85	India	unk	NA	Temp_HR	21 C	85 % RH	Z. m. y	NA	NA	NA	NA	NA	Right	Forewing	NA	NA	93.3481	NA	2.3054	0.00306166	NA	NA	NA	NA	NA	0.0553323
3355	hallow	6_21_85	India	unk	NA	Temp_HR	21 C	85 % RH	Z. m. y	NA	NA	NA	NA	NA	Right	Forewing	NA	NA	96.2595	NA	2.0883	0.0513799	NA	NA	NA	NA	NA	0.226671
3359	hallow	7_21_85	India	unk	NA	Temp_HR	21 C	85 % RH	Z. m. y	NA	NA	NA	NA	NA	Right	Forewing	NA	NA	99.3062	NA	0.5349	0.0453678	NA	NA	NA	NA	NA	0.212997
3361	hallow	8_21_85	India	unk	NA	Temp_HR	21 C	85 % RH	Z. m. y	NA	NA	NA	NA	NA	Right	Forewing	NA	NA	106.209	NA	1.5698	0.0549887	NA	NA	NA	NA	NA	0.234497
3363	hallow	9_21_85	India	unk	NA	Temp_HR	21 C	85 % RH	Z. m. y	NA	NA	NA	NA	NA	Right	Forewing	NA	NA	113.799	NA	0.9071	0.0552569	NA	NA	NA	NA	NA	0.235068
39	moore	22-01-02	Ghana	3	Temp_1.2	Temp_2	22 C	75 % RH	Z. m. y	female	22	9	0.5705	0.0376989	Left	Forewing	ups	wet	155.934	0.59955	1.9596	0.0524658	NA	NA	NA	NA	153	0.229054
88	moore	22-01-03	Ghana	3	Temp_1.2	Temp_2	22 C	75 % RH	Z. m. y	female	22	11	0.5468	0.0371695	Left	Forewing	ups	wet	153.543	0.614	2.13185	0.0428969	NA	NA	NA	NA	153	0.207116
40	moore	22-01-04	Ghana	3	Temp_1.2	Temp_2	22 C	75 % RH	Z. m. y	female	22	9	0.501	0.0361013	Left	Forewing	ups	wet	155.039	0.6842	2.44945	0.0321012	NA	NA	NA	NA	153	0.179168
41	moore	22-01-05	Ghana	3	Temp_1.2	Temp_2	22 C	75 % RH	Z. m. y	female	22	11	0.4782	0.0355452	Left	Forewing	ups	wet	139.498	0.6704	2.855	0.0577508	NA	NA	NA	NA	153	0.240314
783	moore	22-01-06	Ghana	3	Temp_1.2	Temp_2	22 C	75 % RH	Z. m. y	female	23	10	0.5084	0.0347009	Left	Forewing	ups	wet	150.195	0.71065	2.24785	0.0283224	NA	NA	NA	NA	153	0.168293
28	moore	22-01-07	Ghana	3	Temp_1.2	Temp_2	22 C	75 % RH	Z. m. y	female	24	10	0.5418	0.0339679	Left	Forewing	ups	wet	145.922	0.6663	2.818	0.0319513	NA	NA	NA	NA	153	0.178749
636	moore	22-01-08	Ghana	3	Temp_1.2	Temp_2	22 C	75 % RH	Z. m. y	female	24	10	0.5182	0.0334673	Right	Forewing	uns	wet	154.073	0.73515	2.54245	0.0508481	NA	NA	NA	NA	153	0.225495
633	moore	22-01-11	Ghana	3	Temp_1.2	Temp_2	22 C	75 % RH	Z. m. y	female	25	10	0.5052	0.0318577	Right	Forewing	uns	wet	152.01	1.097	3.6062	0.049914	NA	NA	NA	NA	153	0.223414
17	moore	22-01-14	Ghana	3	Temp_1.2	Temp_2	22 C	75 % RH	Z. m. y	female	26	10	0.5214	0.0309564	Left	Forewing	ups	wet	163.553	0.88195	3.5609	0.0209567	NA	NA	NA	NA	153	0.144764
11	moore	22-01-15	Ghana	3	Temp_1.2	Temp_2	22 C	75 % RH	Z. m. y	female	27	10	0.5446	0.0302456	Right	Forewing	uns	wet	165.171	0.85265	3.27	0.0307659	NA	NA	NA	NA	153	0.175402
9	moore	22-01-16	Ghana	3	Temp_1.2	Temp_2	22 C	75 % RH	Z. m. y	female	28	9	0.4154	0.026648	Right	Forewing	uns	wet	128.288	0.70025	2.50735	0.0546385	NA	NA	NA	NA	153	0.233749
42	moore	22-02-02	Ghana	3	Temp_2.2	Temp_2	22 C	75 % RH	Z. m. y	male	21	9	0.4618	0.0368071	Right	Forewing	uns	wet	114.446	0.3069	0.86965	0.0509737	NA	NA	NA	NA	153	0.225773
43	moore	22-02-04	Ghana	3	Temp_2.2	Temp_2	22 C	75 % RH	Z. m. y	male	22	11	0.5006	0.0360917	Right	Forewing	uns	wet	129.756	0.2349	0.5694	0.0548512	NA	NA	NA	NA	153	0.234203
7	moore	22-02-05	Ghana	3	Temp_2.2	Temp_2	22 C	75 % RH	Z. m. y	male	23	10	0.4047	0.03216	Right	Forewing	uns	wet	98.4854	0.2343	0.59985	0.0442162	NA	NA	NA	NA	153	0.210276
86	moore	22-02-06	Ghana	3	Temp_2.2	Temp_2	22 C	75 % RH	Z. m. y	male	23	11	0.4236	0.0326531	Left	Forewing	ups	wet	114.533	0.32555	0.96975	0.0467386	NA	NA	NA	NA	153	0.216191
35	moore	22-02-07	Ghana	3	Temp_2.2	Temp_2	22 C	75 % RH	Z. m. y	female	23	10	0.4041	0.0321441	Left	Forewing	ups	wet	126.552	0.6383	2.2912	0.0588261	NA	NA	NA	NA	153	0.242541
36	moore	22-02-08	Ghana	3	Temp_2.2	Temp_2	22 C	75 % RH	Z. m. y	female	24	10	0.3824	0.0302432	Left	Forewing	ups	wet	128.822	0.6561	2.6293	0.036374	NA	NA	NA	NA	153	0.19072
710	moore	22-02-10	Ghana	3	Temp_2.2	Temp_2	22 C	75 % RH	Z. m. y	male	25	11	0.3494	0.0281731	Left	Forewing	ups	wet	108.284	0.4193	1.2386	0.0332288	NA	NA	NA	NA	153	0.182288
5	moore	22-02-11	Ghana	3	Temp_2.2	Temp_2	22 C	75 % RH	Z. m. y	female	25	11	0.4793	0.0313037	Right	Forewing	uns	wet	154.819	0.772	2.7108	0.0280625	NA	NA	NA	NA	153	0.167519
18	moore	22-02-12	Ghana	3	Temp_2.2	Temp_2	22 C	75 % RH	Z. m. y	female	26	11	0.4272	0.028967	Left	Forewing	ups	int	132.542	0.9116	3.69345	0.0214499	NA	NA	NA	NA	153	0.146458
602	moore	22-02-13	Ghana	3	Temp_2.2	Temp_2	22 C	75 % RH	Z. m. y	female	26	10	0.4285	0.0289964	Left	Forewing	ups	wet	138.393	0.59935	1.9348	0.0595034	NA	NA	NA	NA	153	0.243933
12	moore	22-02-14	Ghana	3	Temp_2.2	Temp_2	22 C	75 % RH	Z. m. y	male	27	10	0.3246	0.0254538	Left	Forewing	ups	wet	104.785	0.5036	1.28995	0.0278644	NA	NA	NA	NA	153	0.166926
4	moore	22-02-15	Ghana	3	Temp_2.2	Temp_2	22 C	75 % RH	Z. m. y	female	27	11	0.5324	0.030018	Right	Forewing	uns	wet	148.108	1.1184	4.08915	0.030152	NA	NA	NA	NA	153	0.173643
665	moore	22-02-16	Ghana	3	Temp_2.2	Temp_2	22 C	75 % RH	Z. m. y	female	28	10	0.352	0.0252168	Right	Forewing	uns	wet	112.125	0.52635	2.0874	0.0485673	NA	NA	NA	NA	153	0.22038
8	moore	22-02-17	Ghana	3	Temp_2.2	Temp_2	22 C	75 % RH	Z. m. y	female	29	11	0.4711	0.0268312	Left	Forewing	ups	wet	146.953	0.9459	3.29555	0.0303708	NA	NA	NA	NA	153	0.174272
428	moore	22-03-01	Ghana	2	moore_3.1	Temp_1	22 C	75 % RH	Z. m. y	male	NA	NA	NA	NA	Right	Forewing	uns	wet	91.8036	0.09614	0.29175	0.0339175	NA	NA	NA	NA	99	0.184167
70	moore	22-03-02	Ghana	3	moore_3.2	Temp_2	22 C	75 % RH	Z. m. y	male	21	10	0.3916	0.0348387	Left	Forewing	ups	wet	105.915	0.42475	1.08755	0.0321477	NA	NA	NA	NA	153	0.179298
483	moore	22-03-02a	Ghana	2	moore_3.1	Temp_1	22 C	75 % RH	Z. m. y	male	21	8	0.3233	0.0326825	Left	Forewing	ups	wet	81.1461	0.2697	0.5416	0.0420616	NA	NA	NA	NA	99	0.205089
216	moore	22-03-04	Ghana	2	moore_3.1	Temp_1	22 C	75 % RH	Z. m. y	female	23	11	0.3525	0.0307132	Left	Forewing	ups	wet	93.3684	0.21525	0.64715	0.0531313	NA	NA	NA	NA	99	0.230502
547	moore	22-03-05	Ghana	2	moore_3.1	Temp_1	22 C	75 % RH	Z. m. y	female	23	11	0.4635	0.0336477	Right	Forewing	uns	wet	137.635	0.6516	2.3933	0.0188745	NA	NA	NA	NA	99	0.137385
894	moore	22-03-06	Ghana	3	moore_3.2	Temp_2	22 C	75 % RH	Z. m. y	male	23	10	0.3898	0.0317604	Left	Forewing	ups	wet	105.978	0.2619	0.852	0.0533433	NA	NA	NA	NA	153	0.230962
400	moore	22-03-06a	Ghana	2	moore_3.1	Temp_1	22 C	75 % RH	Z. m. y	male	23	11	0.3355	0.0302113	Left	Forewing	ups	wet	93.9039	0.22345	0.70905	0.0381208	NA	NA	NA	NA	99	0.195246
59	moore	22-03-07	Ghana	3	moore_3.2	Temp_2	22 C	75 % RH	Z. m. y	female	24	9	0.4761	0.0325353	Left	Forewing	ups	wet	144.144	0.68755	2.36085	0.0427479	NA	NA	NA	NA	153	0.206756
138	moore	22-03-07a	Ghana	2	moore_3.1	Temp_1	22 C	75 % RH	Z. m. y	female	22	NA	0.3862	0.0331015	Left	Forewing	ups	wet	119.601	0.501	1.8295	0.050992	NA	NA	NA	NA	99	0.225814
410	moore	22-03-08a	Ghana	2	moore_3.1	Temp_1	22 C	75 % RH	Z. m. y	female	23	11	0.4502	0.0333227	Left	Forewing	ups	wet	106.237	0.56075	2.1214	0.0311719	NA	NA	NA	NA	99	0.176556
103	moore	22-03-08b	Ghana	3	moore_3.2	Temp_2	22 C	75 % RH	Z. m. y	male	24	11	0.4894	0.0328355	Right	Forewing	uns	wet	111.623	0.31975	0.72745	0.0577697	NA	NA	NA	NA	153	0.240353
317	moore	22-03-09	Ghana	2	moore_3.1	Temp_1	22 C	75 % RH	Z. m. y	female	24	10	0.4605	0.032176	Left	Forewing	ups	wet	123.758	0.575	1.7917	0.0315045	NA	NA	NA	NA	99	0.177495
768	moore	22-03-10	Ghana	3	moore_3.2	Temp_2	22 C	75 % RH	Z. m. y	female	25	10	0.5159	0.032081	Left	Forewing	ups	wet	152.636	0.8077	2.6666	0.0437605	NA	NA	NA	NA	153	0.20919
161	moore	22-03-10a	Ghana	2	moore_3.1	Temp_1	22 C	75 % RH	Z. m. y	female	24	10	0.4744	0.0324965	Right	Forewing	uns	wet	143.125	0.69975	2.4217	0.0359847	NA	NA	NA	NA	99	0.189696
58	moore	22-03-11	Ghana	3	moore_3.2	Temp_2	22 C	75 % RH	Z. m. y	female	25	10	0.5262	0.0322931	Left	Forewing	ups	wet	154.279	0.85005	3.3971	0.0590052	NA	NA	NA	NA	153	0.24291
490	moore	22-03-11a	Ghana	2	moore_3.1	Temp_1	22 C	75 % RH	Z. m. y	male	24	10	0.323	0.0285884	Right	Forewing	uns	wet	96.1453	0.33205	1.0194	0.031589	NA	NA	NA	NA	99	0.177733
19	moore	22-03-12	Ghana	3	moore_3.2	Temp_2	22 C	75 % RH	Z. m. y	female	26	11	0.5475	0.0314645	Left	Forewing	ups	wet	169.519	1.04925	4.0527	0.0160733	NA	NA	NA	NA	153	0.12678
264	moore	22-03-12a	Ghana	2	moore_3.1	Temp_1	22 C	75 % RH	Z. m. y	female	24	10	0.4285	0.0314127	Right	Forewing	uns	wet	120.707	0.56225	2.01785	0.0369446	NA	NA	NA	NA	99	0.19221
545	moore	22-03-15	Ghana	2	moore_3.1	Temp_1	22 C	75 % RH	Z. m. y	male	25	10	0.4367	0.0303474	Right	Forewing	uns	wet	115.689	0.4072	1.4699	0.0244431	NA	NA	NA	NA	99	0.156343
378	moore	22-04-01	Ghana	2	moore_4.1	Temp_1	22 C	75 % RH	Z. m. y	male	21	12	NA	NA	Left	Forewing	ups	wet	127.083	0.3498	0.7038	0.0284533	NA	NA	NA	NA	100	0.168681
74	moore	22-04-01a	Ghana	3	moore_4.2	Temp_2	22 C	75 % RH	Z. m. y	male	19	11	0.4944	0.0416172	Right	Forewing	uns	wet	117.618	0.2551	0.9202	0.0494687	NA	NA	NA	NA	153	0.222416
440	moore	22-04-02	Ghana	2	moore_4.1	Temp_1	22 C	75 % RH	Z. m. y	male	21	12	NA	NA	Right	Forewing	uns	wet	106.98	0.358	0.8437	0.0292144	NA	NA	NA	NA	100	0.170922
72	moore	22-04-02a	Ghana	3	moore_4.2	Temp_2	22 C	75 % RH	Z. m. y	male	21	10	0.3968	0.0349922	Left	Forewing	ups	wet	98.5987	0.2691	0.6014	0.0294991	NA	NA	NA	NA	153	0.171753
164	moore	22-04-03	Ghana	2	moore_4.1	Temp_1	22 C	75 % RH	Z. m. y	female	23	10	0.625	0.0371734	Right	Forewing	uns	wet	159.376	0.7706	2.8008	0.0356045	NA	NA	NA	NA	100	0.188691
63	moore	22-04-04a	Ghana	3	moore_4.2	Temp_2	22 C	75 % RH	Z. m. y	male	22	11	0.4509	0.0348555	Right	Forewing	uns	wet	120.635	0.3657	1.07235	0.0371205	NA	NA	NA	NA	153	0.192667
437	moore	22-04-05	Ghana	2	moore_4.1	Temp_1	22 C	75 % RH	Z. m. y	male	23	10	0.4265	0.0327274	Left	Forewing	ups	wet	108.112	0.48765	1.56095	0.0315685	NA	NA	NA	NA	100	0.177675
579	moore	22-04-06	Ghana	2	moore_4.1	Temp_1	22 C	75 % RH	Z. m. y	female	24	9	0.5275	0.0336664	Right	Forewing	uns	wet	145.326	0.8019	2.5264	0.0145916	NA	NA	NA	NA	100	0.120796
299	moore	22-04-07	Ghana	2	moore_4.1	Temp_1	22 C	75 % RH	Z. m. y	male	22	11	0.5178	0.0365004	Left	Forewing	ups	wet	125.35	0.42575	0.7671	0.0305188	NA	NA	NA	NA	100	0.174696
254	moore	22-04-08	Ghana	2	moore_4.1	Temp_1	22 C	75 % RH	Z. m. y	female	24	10	0.6476	0.0360488	Right	Forewing	uns	wet	165.557	0.9385	3.6195	0.0273183	NA	NA	NA	NA	100	0.165283
211	moore	22-04-09	Ghana	2	moore_4.1	Temp_1	22 C	75 % RH	Z. m. y	female	24	10	0.4891	0.0328288	Right	Forewing	uns	wet	137.794	0.6774	2.5316	0.0314505	NA	NA	NA	NA	100	0.177343
121	moore	22-04-10	Ghana	2	moore_4.1	Temp_1	22 C	75 % RH	Z. m. y	female	26	9	0.5459	0.0314339	Left	Forewing	ups	wet	118.105	0.8868	3.41955	0.0576732	NA	NA	NA	NA	100	0.240152
259	moore	22-04-11	Ghana	2	moore_4.1	Temp_1	22 C	75 % RH	Z. m. y	female	26	8	0.547	0.031455	Left	Forewing	ups	wet	155.537	0.78205	2.93025	0.0301291	NA	NA	NA	NA	100	0.173577
166	moore	22-04-12	Ghana	2	moore_4.1	Temp_1	22 C	75 % RH	Z. m. y	female	26	9	0.5192	0.0309128	Right	Forewing	uns	wet	152.461	0.88055	3.2742	0.0369401	NA	NA	NA	NA	100	0.192198
737	moore	22-05-02	Ghana	3	moore_5.2	Temp_2	22 C	75 % RH	Z. m. y	female	21	9	0.4648	0.0368867	Right	Forewing	uns	wet	133.278	0.45085	1.8258	0.0638413	NA	NA	NA	NA	154	0.252668
969	moore	22-05-03	Ghana	3	moore_5.2	Temp_2	22 C	75 % RH	Z. m. y	female	22	10	0.4767	0.035508	Left	Forewing	ups	wet	125.32	0.5585	2.3166	0.0664645	NA	NA	NA	NA	154	0.257807
64	moore	22-05-04	Ghana	3	moore_5.2	Temp_2	22 C	75 % RH	Z. m. y	female	22	10	0.5208	0.0365708	Right	Forewing	uns	wet	145.259	0.76785	2.7766	0.0348997	NA	NA	NA	NA	154	0.186814
644	moore	22-05-05	Ghana	3	moore_5.2	Temp_2	22 C	75 % RH	Z. m. y	female	22	10	0.5	0.0360773	Left	Forewing	ups	wet	137.946	0.8842	3.0697	0.055768	NA	NA	NA	NA	154	0.236153
606	moore	22-05-06	Ghana	3	moore_5.2	Temp_2	22 C	75 % RH	Z. m. y	NA	22	10	0.5032	0.0361541	Left	Forewing	ups	wet	144.552	0.47665	1.8192	0.0490142	NA	NA	NA	NA	154	0.221391
108	moore	22-05-07	Ghana	3	moore_5.2	Temp_2	22 C	75 % RH	Z. m. y	male	23	11	0.4415	0.0331067	Right	Forewing	uns	wet	126.106	0.6035	1.93955	0.0578037	NA	NA	NA	NA	154	0.240424
595	moore	22-05-09	Ghana	3	moore_5.2	Temp_2	22 C	75 % RH	Z. m. y	female	25	11	0.4895	0.0315242	Right	Forewing	uns	wet	155.079	1.2396	4.7478	0.0324643	NA	NA	NA	NA	154	0.180178
588	moore	22-05-13	Ghana	3	moore_5.2	Temp_2	22 C	75 % RH	Z. m. y	male	27	12	0.4849	0.0290974	Right	Forewing	uns	wet	125.251	0.6306	2.49265	0.0378105	NA	NA	NA	NA	154	0.194449
128	moore	22-07-02	Ghana	2	moore_7.1	Temp_1	22 C	75 % RH	Z. m. y	female	21	9	0.5736	0.0395655	Left	Forewing	ups	wet	153.531	0.62765	2.36365	0.0429748	NA	NA	NA	NA	103	0.207304
116	moore	22-07-03	Ghana	2	moore_7.1	Temp_1	22 C	75 % RH	Z. m. y	female	23	9	0.555	0.0357303	Left	Forewing	ups	wet	147.799	0.67795	2.26125	0.0650268	NA	NA	NA	NA	103	0.255004
553	moore	22-07-05	Ghana	2	moore_7.1	Temp_1	22 C	75 % RH	Z. m. y	male	33	11	0.2512	0.0191202	Left	Forewing	ups	wet	68.4375	0.40245	1.4187	0.0304973	NA	NA	NA	NA	103	0.174635
371	moore	22-12-01	Ghana	2	Temp_12.1	Temp_1	22 C	75 % RH	Z. m. y	male	23	9	0.5288	0.035159	Right	Forewing	uns	wet	122.78	0.37045	0.9899	0.0305041	NA	NA	NA	NA	104	0.174654
261	moore	22-12-02	Ghana	2	Temp_12.1	Temp_1	22 C	75 % RH	Z. m. y	male	23	10	0.5103	0.0347441	Left	Forewing	ups	wet	120.537	0.36015	0.99365	0.0361662	NA	NA	NA	NA	104	0.190174
120	moore	22-12-03	Ghana	2	Temp_12.1	Temp_1	22 C	75 % RH	Z. m. y	female	24	9	0.5505	0.0341487	Right	Forewing	uns	wet	144.205	0.59115	1.88755	0.0559043	NA	NA	NA	NA	104	0.236441
181	moore	22-12-04	Ghana	2	Temp_12.1	Temp_1	22 C	75 % RH	Z. m. y	female	24	9	0.5889	0.034925	Left	Forewing	ups	wet	129.915	0.6098	2.07815	0.0360025	NA	NA	NA	NA	104	0.189743
212	moore	22-12-05	Ghana	2	Temp_12.1	Temp_1	22 C	75 % RH	Z. m. y	female	24	9	0.4875	0.0327929	Right	Forewing	uns	wet	130.249	0.79785	2.45265	0.0405332	NA	NA	NA	NA	104	0.201329
432	moore	22-12-06	Ghana	2	Temp_12.1	Temp_1	22 C	75 % RH	Z. m. y	male	24	9	0.5109	0.0333094	Left	Forewing	ups	wet	120.567	0.36975	1.03215	0.0229731	NA	NA	NA	NA	104	0.151569
221	moore	22-12-07	Ghana	2	Temp_12.1	Temp_1	22 C	75 % RH	Z. m. y	female	25	10	0.5712	0.0331886	Left	Forewing	ups	wet	145.21	0.91675	3.16445	0.0342007	NA	NA	NA	NA	104	0.184934
287	moore	22-12-08	Ghana	2	Temp_12.1	Temp_1	22 C	75 % RH	Z. m. y	female	25	10	0.4988	0.0317226	Right	Forewing	uns	wet	128.926	0.6015	2.3783	0.0336383	NA	NA	NA	NA	104	0.183408
131	moore	22-12-09	Ghana	2	Temp_12.1	Temp_1	22 C	75 % RH	Z. m. y	female	26	9	0.5399	0.0313183	Right	Forewing	uns	wet	142.988	0.5716	2.10415	0.0497542	NA	NA	NA	NA	104	0.223056
407	moore	22-12-10	Ghana	2	Temp_12.1	Temp_1	22 C	75 % RH	Z. m. y	male	26	8	0.5585	0.0316739	Left	Forewing	ups	wet	135.381	0.5035	1.2347	0.0253848	NA	NA	NA	NA	104	0.159326
230	moore	22-12-11	Ghana	2	Temp_12.1	Temp_1	22 C	75 % RH	Z. m. y	male	26	10	0.5551	0.0316095	Left	Forewing	ups	wet	125.141	0.42515	1.54455	0.0378396	NA	NA	NA	NA	104	0.194524
364	moore	22-12-12	Ghana	2	Temp_12.1	Temp_1	22 C	75 % RH	Z. m. y	female	NA	NA	NA	NA	Left	Forewing	ups	wet	165.529	1.18815	4.07115	0.023602	NA	NA	NA	NA	104	0.153629
546	moore	22-18-01	Ghana	2	Temp_18.1	Temp_1	22 C	75 % RH	Z. m. y	male	25	11	0.349	0.0281623	Right	Forewing	uns	wet	92.1475	0.4502	1.4074	0.0288655	NA	NA	NA	NA	104	0.169898
335	moore	22-18-02	Ghana	2	Temp_18.1	Temp_1	22 C	75 % RH	Z. m. y	female	26	10	NA	NA	Right	Forewing	uns	wet	163.286	0.79225	2.69505	0.0238315	NA	NA	NA	NA	104	0.154375
199	moore	22-18-04	Ghana	2	Temp_18.1	Temp_1	22 C	75 % RH	Z. m. y	male	26	9	0.3659	0.0275094	Left	Forewing	ups	wet	104.057	0.3557	1.3087	0.0483645	NA	NA	NA	NA	104	0.219919
487	moore	22-18-06	Ghana	2	Temp_18.1	Temp_1	22 C	75 % RH	Z. m. y	female	26	9	0.4869	0.030258	Left	Forewing	ups	wet	143.561	0.88765	2.9234	0.0199567	NA	NA	NA	NA	104	0.141268
331	moore	22-18-07	Ghana	2	Temp_18.1	Temp_1	22 C	75 % RH	Z. m. y	female	26	10	0.5113	0.0307552	Right	Forewing	uns	wet	155.46	0.9512	3.27085	0.0271541	NA	NA	NA	NA	104	0.164785
227	moore	22-22-01	Ghana	2	Temp_22.1	Temp_1	22 C	75 % RH	Z. m. y	male	19	10	0.4707	0.0409413	Left	Forewing	ups	wet	117.072	0.24585	0.5628	0.0400562	NA	NA	NA	NA	105	0.20014
513	moore	22-22-02	Ghana	2	Temp_22.1	Temp_1	22 C	75 % RH	Z. m. y	male	20	9	0.3658	0.0357589	Right	Forewing	uns	wet	87.4111	0.25575	0.48685	0.0311748	NA	NA	NA	NA	105	0.176564
150	moore	22-22-03	Ghana	2	Temp_22.1	Temp_1	22 C	75 % RH	Z. m. y	female	21	8	0.4296	0.035931	Right	Forewing	uns	wet	128.608	0.4003	1.34445	0.0464076	NA	NA	NA	NA	105	0.215424
130	moore	22-22-04	Ghana	2	Temp_22.1	Temp_1	22 C	75 % RH	Z. m. y	male	23	9	0.485	0.0341601	Left	Forewing	ups	wet	113.628	0.2631	0.7216	0.0596915	NA	NA	NA	NA	105	0.244318
157	moore	22-22-04(2)	Ghana	2	Temp_22.1	Temp_1	22 C	75 % RH	Z. m. y	male	NA	NA	0.453	NA	Left	Forewing	ups	wet	101.652	0.28255	0.6937	0.0525695	NA	NA	NA	NA	105	0.22928
172	moore	22-22-05	Ghana	2	Temp_22.1	Temp_1	22 C	75 % RH	Z. m. y	male	23	8	0.4197	0.0325526	Right	Forewing	uns	wet	97.7398	0.28895	0.66435	0.0526038	NA	NA	NA	NA	105	0.229355
423	moore	22-22-05(2)	Ghana	2	Temp_22.1	Temp_1	22 C	75 % RH	Z. m. y	female	NA	NA	0.4586	NA	Left	Forewing	ups	wet	133.638	0.548	2.2243	0.0260413	NA	NA	NA	NA	105	0.161373
178	moore	22-22-06	Ghana	2	Temp_22.1	Temp_1	22 C	75 % RH	Z. m. y	female	24	10	0.5244	0.0336003	Left	Forewing	ups	wet	140.923	0.87	2.90425	0.0365478	NA	NA	NA	NA	105	0.191175
139	moore	22-22-07	Ghana	2	Temp_22.1	Temp_1	22 C	75 % RH	Z. m. y	female	24	10	0.3654	0.0297882	Left	Forewing	ups	wet	96.9877	0.43585	1.38185	0.0636453	NA	NA	NA	NA	105	0.25228
421	moore	22-22-08	Ghana	2	Temp_22.1	Temp_1	22 C	75 % RH	Z. m. y	female	24	10	0.4088	0.0309238	Right	Forewing	uns	wet	126.963	0.59485	2.22985	0.025972	NA	NA	NA	NA	105	0.161158
177	moore	22-22-09	Ghana	2	Temp_22.1	Temp_1	22 C	75 % RH	Z. m. y	female	24	9	0.5138	0.0333724	Left	Forewing	ups	wet	145.423	0.77545	2.71345	0.0368958	NA	NA	NA	NA	105	0.192083
373	moore	22-22-11	Ghana	2	Temp_22.1	Temp_1	22 C	75 % RH	Z. m. y	female	26	10	0.361	0.027386	Right	Forewing	uns	wet	118.531	0.9225	2.95475	0.0297445	NA	NA	NA	NA	105	0.172466
1	moore	22-22-14	Ghana	2	Temp_22.1	Temp_1	22 C	75 % RH	Z. m. y	female	NA	NA	NA	NA	Right	Forewing	uns	wet	142.694	0.88855	3.2664	0.0358911	NA	NA	NA	NA	105	0.189449
208	moore	22-22-15	Ghana	2	Temp_22.1	Temp_1	22 C	75 % RH	Z. m. y	male	NA	NA	NA	NA	Left	Forewing	ups	wet	116.483	0.4022	1.12585	0.0422077	NA	NA	NA	NA	105	0.205445
369	moore	22-27-01	Ghana	2	Temp_27.1	Temp_1	22 C	75 % RH	Z. m. y	male	22	10	0.4173	0.0339672	Right	Forewing	uns	wet	105.43	0.2797	0.8277	0.0377823	NA	NA	NA	NA	107	0.194377
480	moore	22-27-02	Ghana	2	Temp_27.1	Temp_1	22 C	75 % RH	Z. m. y	male	24	10	NA	NA	Left	Forewing	ups	wet	96.3564	0.314	0.96395	0.0251876	NA	NA	NA	NA	107	0.158706
124	moore	22-27-03	Ghana	2	Temp_27.1	Temp_1	22 C	75 % RH	Z. m. y	female	24	10	0.3758	0.0300682	Right	Forewing	uns	wet	118.119	0.47465	1.7862	0.0677096	NA	NA	NA	NA	107	0.260211
203	moore	22-27-04	Ghana	2	Temp_27.1	Temp_1	22 C	75 % RH	Z. m. y	female	24	9	0.4355	0.0315829	Left	Forewing	ups	wet	135.009	0.538	1.89095	0.0343041	NA	NA	NA	NA	107	0.185214
450	moore	22-27-08	Ghana	2	Temp_27.1	Temp_1	22 C	75 % RH	Z. m. y	male	23	9	0.448	0.0332684	Right	Forewing	uns	wet	108.752	0.31775	0.8711	0.0302949	NA	NA	NA	NA	107	0.174054
467	moore	22-27-09	Ghana	2	Temp_27.1	Temp_1	22 C	75 % RH	Z. m. y	male	23	10	0.429	0.0327912	Right	Forewing	uns	wet	120.192	0.4129	0.98445	0.0246919	NA	NA	NA	NA	107	0.157137
268	moore	22-27-10	Ghana	2	Temp_27.1	Temp_1	22 C	75 % RH	Z. m. y	female	NA	NA	NA	NA	Left	Forewing	ups	wet	143.428	0.7385	2.4169	0.0295572	NA	NA	NA	NA	107	0.171922
549	moore	22-27-10(2)	Ghana	2	Temp_27.1	Temp_1	22 C	75 % RH	Z. m. y	female	NA	NA	NA	NA	Right	Forewing	uns	wet	137.175	0.7376	2.63585	0.0154647	NA	NA	NA	NA	107	0.124357
425	moore	22-27-12	Ghana	2	Temp_27.1	Temp_1	22 C	75 % RH	Z. m. y	female	26	9	0.4988	0.0305025	Right	Forewing	uns	wet	150.602	0.8917	3.03765	0.0221791	NA	NA	NA	NA	107	0.148926
472	moore	22-27-13	Ghana	2	Temp_27.1	Temp_1	22 C	75 % RH	Z. m. y	NA	27	10	0.4432	0.0282381	Right	Forewing	uns	wet	115.128	0.58255	1.43855	0.0278884	NA	NA	NA	NA	107	0.166998
673	moore	22-27-15	Ghana	2	Temp_27.1	Temp_1	22 C	75 % RH	Z. m. y	female	38	9	0.2814	0.0172448	Left	Forewing	ups	int	95.4767	0.6367	2.70395	0.0117317	NA	NA	NA	NA	107	0.108313
396	moore	22-27-16a	Ghana	2	Temp_27.1	Temp_1	22 C	75 % RH	Z. m. y	female	43	NA	NA	NA	Left	Forewing	ups	wet	115.866	0.76535	2.93072	0.0236115	NA	NA	NA	NA	107	0.15366
248	moore	22-36-01	Ghana	2	moore_36.1	Temp_1	22 C	75 % RH	Z. m. y	female	22	10	0.5229	0.0366199	Left	Forewing	ups	wet	123.713	0.62185	1.865	0.0381202	NA	NA	NA	NA	108	0.195244
245	moore	22-36-02	Ghana	2	moore_36.1	Temp_1	22 C	75 % RH	Z. m. y	male	23	9	0.416	0.0324566	Right	Forewing	uns	wet	91.1651	0.12425	0.4139	0.0528947	NA	NA	NA	NA	108	0.229988
119	moore	22-36-03	Ghana	2	moore_36.1	Temp_1	22 C	75 % RH	Z. m. y	female	23	9	0.5238	0.0350478	Left	Forewing	ups	wet	138.484	0.66945	2.16505	0.0605672	NA	NA	NA	NA	108	0.246104
126	moore	22-36-04	Ghana	2	moore_36.1	Temp_1	22 C	75 % RH	Z. m. y	female	23	10	0.4617	0.0336041	Right	Forewing	uns	wet	131.869	0.7178	2.5312	0.0579217	NA	NA	NA	NA	108	0.240669
133	moore	22-36-05	Ghana	2	moore_36.1	Temp_1	22 C	75 % RH	Z. m. y	female	22	8	0.5326	0.0368449	Right	Forewing	uns	wet	147.844	0.8132	2.6189	0.0453667	NA	NA	NA	NA	108	0.212995
570	moore	22-36-06	Ghana	2	moore_36.1	Temp_1	22 C	75 % RH	Z. m. y	male	23	10	0.4702	0.0338091	Right	Forewing	uns	wet	110.471	0.28755	0.8878	0.0190952	NA	NA	NA	NA	108	0.138185
381	moore	22-36-08	Ghana	2	moore_36.1	Temp_1	22 C	75 % RH	Z. m. y	male	23	10	0.417	0.0324826	Left	Forewing	ups	wet	98.7896	0.3313	1.0029	0.0382968	NA	NA	NA	NA	108	0.195696
241	moore	22-36-09	Ghana	2	moore_36.1	Temp_1	22 C	75 % RH	Z. m. y	female	25	9	0.3524	0.0282535	Right	Forewing	uns	wet	110.813	0.5266	2.09555	0.0387046	NA	NA	NA	NA	108	0.196735
257	moore	22-36-10	Ghana	2	moore_36.1	Temp_1	22 C	75 % RH	Z. m. y	male	26	9	0.4242	0.028899	Right	Forewing	uns	wet	109.069	0.27505	0.6696	0.0417989	NA	NA	NA	NA	108	0.204448
386	moore	22-36-11	Ghana	2	moore_36.1	Temp_1	22 C	75 % RH	Z. m. y	female	26	9	0.3796	0.0278485	Left	Forewing	ups	wet	104.678	0.5931	2.19075	0.0314072	NA	NA	NA	NA	108	0.177221
330	moore	22-36-12	Ghana	2	moore_36.1	Temp_1	22 C	75 % RH	Z. m. y	female	26	9	0.452	0.029517	Left	Forewing	ups	wet	129.164	0.6683	2.4389	0.0320885	NA	NA	NA	NA	108	0.179133
541	moore	22-36-14	Ghana	2	moore_36.1	Temp_1	22 C	75 % RH	Z. m. y	male	NA	NA	NA	NA	Left	Forewing	ups	wet	79.1883	0.1636	0.6186	0.0435026	NA	NA	NA	NA	108	0.208573
171	moore	22-36-15	Ghana	2	moore_36.1	Temp_1	22 C	75 % RH	Z. m. y	female	NA	NA	NA	NA	Right	Forewing	uns	wet	108.164	0.49955	2.00345	0.0451505	NA	NA	NA	NA	108	0.212487
226	moore	22-36-16	Ghana	2	moore_36.1	Temp_1	22 C	75 % RH	Z. m. y	female	NA	NA	NA	NA	Right	Forewing	uns	wet	122.562	0.6934	2.51215	0.0391696	NA	NA	NA	NA	108	0.197913
481	moore	22-36-17	Ghana	2	moore_36.1	Temp_1	22 C	75 % RH	Z. m. y	female	28	10	0.3612	0.0254346	Left	Forewing	ups	wet	112.638	0.48175	1.79095	0.0245231	NA	NA	NA	NA	108	0.156599
251	moore	22-36-20	Ghana	2	moore_36.1	Temp_1	22 C	75 % RH	Z. m. y	male	28	10	0.5098	0.0285304	Left	Forewing	ups	wet	111.859	0.3683	1.2935	0.0396379	NA	NA	NA	NA	108	0.199093
434	moore	22-44-01	Ghana	2	moore_44.1	Temp_1	22 C	75 % RH	Z. m. y	male	NA	NA	NA	NA	Left	Forewing	ups	wet	104.187	0.28425	0.5554	0.0270985	NA	NA	NA	NA	108	0.164616
204	moore	22-44-02	Ghana	2	moore_44.1	Temp_1	22 C	75 % RH	Z. m. y	female	25	9	0.5244	0.0322563	Left	Forewing	ups	wet	144.572	0.5932	1.98335	0.034195	NA	NA	NA	NA	108	0.184919
253	moore	22-44-03	Ghana	2	moore_44.1	Temp_1	22 C	75 % RH	Z. m. y	male	25	10	0.4389	0.0303982	Left	Forewing	ups	wet	107.541	0.34095	0.91485	0.0432453	NA	NA	NA	NA	108	0.207955
348	moore	22-44-04	Ghana	2	moore_44.1	Temp_1	22 C	75 % RH	Z. m. y	male	25	9	0.4938	0.0316162	Right	Forewing	uns	wet	117.042	0.34005	1.22155	0.0352608	NA	NA	NA	NA	108	0.187779
438	moore	22-44-05	Ghana	2	moore_44.1	Temp_1	22 C	75 % RH	Z. m. y	female	25	9	0.4224	0.0300124	Left	Forewing	ups	wet	128.191	0.57865	1.9332	0.0236976	NA	NA	NA	NA	108	0.15394
341	moore	22-44-06	Ghana	2	moore_44.1	Temp_1	22 C	75 % RH	Z. m. y	female	25	9	0.4858	0.0314446	Left	Forewing	ups	wet	142.798	0.53065	1.72995	0.0278342	NA	NA	NA	NA	108	0.166836
349	moore	22-44-07	Ghana	2	moore_44.1	Temp_1	22 C	75 % RH	Z. m. y	male	25	10	0.4994	0.0317353	Left	Forewing	ups	wet	117.454	0.4291	1.1611	0.033915	NA	NA	NA	NA	108	0.18416
136	moore	22-44-09	Ghana	2	moore_44.1	Temp_1	22 C	75 % RH	Z. m. y	male	25	10	0.4564	0.030797	Left	Forewing	ups	wet	106.087	0.17835	0.153755	0.0608725	NA	NA	NA	NA	108	0.246724
162	moore	22-44-10	Ghana	2	moore_44.1	Temp_1	22 C	75 % RH	Z. m. y	female	25	10	0.4749	0.0312076	Left	Forewing	ups	wet	132.922	0.6291	2.2836	0.0429093	NA	NA	NA	NA	108	0.207146
353	moore	22-44-11	Ghana	2	moore_44.1	Temp_1	22 C	75 % RH	Z. m. y	male	25	10	0.4553	0.0307722	Right	Forewing	uns	wet	110.506	0.2904	0.90805	0.0360388	NA	NA	NA	NA	108	0.189839
275	moore	22-44-13	Ghana	2	moore_44.1	Temp_1	22 C	75 % RH	Z. m. y	female	27	9	0.4429	0.0282318	Right	Forewing	uns	wet	119.636	0.47245	1.58445	0.0326915	NA	NA	NA	NA	108	0.180808
235	moore	22-44-14	Ghana	2	moore_44.1	Temp_1	22 C	75 % RH	Z. m. y	female	27	10	0.3766	0.0267463	Right	Forewing	uns	wet	117.342	0.5621	2.025	0.0410688	NA	NA	NA	NA	108	0.202654
564	moore	22-44-15	Ghana	2	moore_44.1	Temp_1	22 C	75 % RH	Z. m. y	female	27	10	0.4809	0.0290171	Left	Forewing	ups	wet	142.195	0.68855	2.7434	0.0150986	NA	NA	NA	NA	108	0.122877
655	moore	22-44-16	Ghana	2	moore_44.1	Temp_1	22 C	75 % RH	Z. m. y	male	27	10	0.4012	0.0273164	Right	Forewing	uns	wet	106.172	0.29015	0.81005	0.00962071	NA	NA	NA	NA	108	0.0980852
496	moore	22-44-17	Ghana	2	moore_44.1	Temp_1	22 C	75 % RH	Z. m. y	female	28	10	0.3459	0.0250703	Right	Forewing	uns	wet	115.281	0.57565	2.07585	0.0271875	NA	NA	NA	NA	108	0.164886
333	moore	22-44-18	Ghana	2	moore_44.1	Temp_1	22 C	75 % RH	Z. m. y	female	27	10	0.3391	0.0258273	Left	Forewing	ups	wet	95.7464	0.55315	1.89355	0.0428062	NA	NA	NA	NA	108	0.206897
282	moore	22-44-19	Ghana	2	moore_44.1	Temp_1	22 C	75 % RH	Z. m. y	female	33	9	0.3985	0.0222995	Left	Forewing	ups	wet	117.649	0.6682	2.43485	0.0361354	NA	NA	NA	NA	108	0.190093
2089	moll	1	India	2	moll_3	Plant_2	24 C	69 % RH	A. c.	male	29	12	0.5419	0.0281131	Left	Forewing	uns	dry	NA	NA	NA	NA	1	0.02026	d	1	2016-09-19	NA
2117	moll	2	India	2	moll_3	Plant_2	24 C	69 % RH	A. c.	female	29	10	0.4608	0.0266342	Left	Forewing	uns	dry	NA	NA	NA	NA	1	0.02026	d	1	2016-09-19	NA
2159	moll	4	India	2	moll_4	Plant_2	24 C	69 % RH	Z. m. y	female	28	9	0.3659	0.0255444	Left	Forewing	uns	dry	NA	NA	NA	NA	2	0.04792	i	1	2016-09-20	NA
2301	moll	6	India	2	moll_4	Plant_2	24 C	69 % RH	Z. m. y	female	28	8	0.3883	0.0260554	Left	Forewing	uns	int	NA	NA	NA	NA	2	0.04792	d	2	2016-09-20	NA
2503	moll	7	India	2	moll_4	Plant_2	24 C	69 % RH	Z. m. y	female	28	8	0.3977	0.026264	Left	Forewing	uns	dry	NA	NA	NA	NA	1	0.02026	d	1	2016-09-20	NA
2681	moll	8	India	2	moll_4	Plant_2	24 C	69 % RH	Z. m. y	male	28	9	0.4357	0.0270752	Left	Forewing	uns	dry	NA	NA	NA	NA	1	0.02026	d	0	2016-09-20	NA
2883	moll	9	India	2	moll_4	Plant_2	24 C	69 % RH	Z. m. y	male	28	8	0.3999	0.0263123	Left	Forewing	uns	dry	NA	NA	NA	NA	1	0.02026	d	1	2016-09-20	NA
2091	moll	10	India	2	moll_1	Plant_2	24 C	69 % RH	B. mu.	male	36	13	0.38604	0.0202259	Left	Forewing	uns	dry	NA	NA	NA	NA	1	0.02026	d	0	2016-09-19	NA
2095	moll	11.1	India	2	moll_9	Plant_2	24 C	69 % RH	B. mi.	male	26	9	0.3881	0.0280548	Left	Forewing	uns	int	NA	NA	NA	NA	3	0.07433	w	2	2016-10-09	NA
2115	moll	19	India	2	moll_1	Plant_2	24 C	69 % RH	B. mu.	female	39	10	NA	NA	Left	Forewing	uns	dry	NA	NA	NA	NA	1	0.02026	d	1	2016-09-19	NA
2119	moll	20	India	2	moll_13	Plant_2	24 C	69 % RH	A. c.	female	27	10	0.4601	0.0285926	Left	Forewing	uns	wet	NA	NA	NA	NA	4	0.09885	w	4	2016-10-10	NA
2121	moll	21	India	2	moll_13	Plant_2	24 C	69 % RH	A. c.	female	27	9	0.4362	0.0280887	Left	Forewing	uns	dry	NA	NA	NA	NA	1	0.02026	d	2	2016-10-10	NA
2123	moll	22	India	2	moll_14	Plant_2	24 C	69 % RH	B. mi.	male	26	10	0.3729	0.0276837	Left	Forewing	uns	int	NA	NA	NA	NA	3	0.07433	w	2	2016-10-11	NA
2125	moll	23	India	2	moll_14	Plant_2	24 C	69 % RH	B. mi.	male	26	9	0.3907	0.0281174	Left	Forewing	uns	int	NA	NA	NA	NA	2	0.04792	w	2	2016-10-11	NA
2127	moll	24	India	2	moll_14	Plant_2	24 C	69 % RH	B. mi.	male	26	8	0.3375	0.0267784	Left	Forewing	uns	dry	NA	NA	NA	NA	1	0.02026	d	2	2016-10-11	NA
2129	moll	25	India	2	moll_28	Plant_2	24 C	69 % RH	Z. m. y	female	24	8	0.3987	0.030667	Left	Forewing	uns	wet	NA	NA	NA	NA	4	0.09885	w	4	2016-10-13	NA
2131	moll	26.1	India	2	moll_19	Plant_2	24 C	69 % RH	B. mu.	male	26	9	0.4427	0.0293132	Left	Forewing	uns	int	NA	NA	NA	NA	3	0.07433	w	3	2016-10-11	NA
2133	moll	26.2	India	2	moll_39.5	Plant_2	24 C	69 % RH	B. mu.	female	21	9	NA	NA	Left	Forewing	uns	wet	NA	NA	NA	NA	3	0.07433	w	3	2016-10-16	NA
2135	moll	27	India	2	moll_39	Plant_2	24 C	69 % RH	C. f.	male	22	8	0.4872	0.0357668	Left	Forewing	uns	wet	NA	NA	NA	NA	3	0.07433	w	4	2016-10-15	NA
2137	moll	28	India	2	moll_9	Plant_2	24 C	69 % RH	B. mi.	male	28	8	0.3889	0.0260688	Left	Forewing	uns	int	NA	NA	NA	NA	2	0.04792	i	2	2016-10-09	NA
2139	moll	29	India	2	moll_9	Plant_2	24 C	69 % RH	B. mi.	female	29	8	0.3802	0.0249808	Left	Forewing	uns	wet	NA	NA	NA	NA	3	0.07433	w	4	2016-10-09	NA
2141	moll	30	India	2	moll_9	Plant_2	24 C	69 % RH	B. mi.	female	29	8	0.3763	0.0248951	Left	Forewing	uns	wet	NA	NA	NA	NA	3	0.07433	w	3	2016-10-09	NA
2143	moll	31	India	2	moll_9	Plant_2	24 C	69 % RH	B. mi.	female	29	8	0.3824	0.0250289	Left	Forewing	uns	wet	NA	NA	NA	NA	4	0.09885	w	4	2016-10-09	NA
2145	moll	32	India	2	moll_9	Plant_2	24 C	69 % RH	B. mi.	female	29	9	0.4596	0.0266111	Left	Forewing	uns	int	NA	NA	NA	NA	2	0.04792	i	2	2016-10-09	NA
2147	moll	33	India	2	moll_22	Plant_2	24 C	69 % RH	A. c.	female	26	8	0.3757	0.0277528	Left	Forewing	uns	wet	NA	NA	NA	NA	3	0.07433	w	3	2016-10-12	NA
2149	moll	34	India	2	moll_22	Plant_2	24 C	69 % RH	A. c.	female	26	8	0.4109	0.0285938	Left	Forewing	uns	wet	NA	NA	NA	NA	3	0.07433	w	3	2016-10-12	NA
2151	moll	36	India	2	moll_22	Plant_2	24 C	69 % RH	A. c.	female	26	9	0.4354	0.0291512	Left	Forewing	uns	int	NA	NA	NA	NA	2	0.04792	d	2	2016-10-12	NA
2153	moll	37	India	2	moll_19	Plant_2	24 C	69 % RH	B. mu.	male	27	8	0.36	0.0263474	Left	Forewing	uns	wet	NA	NA	NA	NA	3	0.07433	w	3	2016-10-11	NA
2155	moll	38	India	2	moll_16	Plant_2	24 C	69 % RH	Z. m. o	male	27	NA	0.325	0.0254642	Left	Forewing	uns	wet	NA	NA	NA	NA	NA	NA	NA	NA	2016-10-11	NA
2157	moll	39	India	2	moll_18	Plant_2	24 C	69 % RH	S. b.	female	27	8	0.4816	0.0290312	Left	Forewing	uns	int	NA	NA	NA	NA	2	0.04792	w	3	2016-10-11	NA
2299	moll	59	India	2	moll_15	Plant_2	24 C	69 % RH	S. b.	female	29	9	0.3014	0.0231197	Left	Forewing	uns	int	NA	NA	NA	NA	2	0.04792	i	2	2016-10-11	NA
2303	moll	60	India	2	moll_15	Plant_2	24 C	69 % RH	S. b.	male	29	9	0.4075	0.0255649	Left	Forewing	uns	int	NA	NA	NA	NA	3	0.07433	d	3	2016-10-11	NA
2323	moll	61	India	2	moll_13	Plant_2	24 C	69 % RH	A. c.	female	29	9	0.4567	0.026555	Left	Forewing	uns	wet	NA	NA	NA	NA	4	0.09885	w	4	2016-10-10	NA
2341	moll	62	India	2	moll_11	Plant_2	24 C	69 % RH	C. d.	male	30	9	0.2701	0.021547	Left	Forewing	uns	int	NA	NA	NA	NA	3	0.07433	w	2	2016-10-10	NA
2357	moll	63	India	2	moll_16	Plant_2	24 C	69 % RH	Z. m. o	female	28	9	0.4561	0.0274913	Left	Forewing	uns	wet	NA	NA	NA	NA	4	0.09885	w	4	2016-10-11	NA
2379	moll	64	India	2	moll_30	Plant_2	24 C	69 % RH	A. c.	female	27	9	0.4374	0.0281144	Left	Forewing	uns	wet	NA	NA	NA	NA	3	0.07433	w	4	2016-10-13	NA
2401	moll	65	India	2	moll_13	Plant_2	24 C	69 % RH	A. c.	male	30	9	0.4508	0.0255588	Left	Forewing	uns	wet	NA	NA	NA	NA	4	0.09885	w	3	2016-10-10	NA
2659	moll	79	India	2	moll_16	Plant_2	24 C	69 % RH	Z. m. o	female	30	8	0.3669	0.0238632	Left	Forewing	uns	wet	NA	NA	NA	NA	NA	NA	NA	NA	2016-10-11	NA
2683	moll	80	India	2	moll_40	Plant_2	24 C	69 % RH	Z. m. y	female	25	6	0.3918	0.0292695	Left	Forewing	uns	wet	NA	NA	NA	NA	4	0.09885	w	4	2016-10-16	NA
2703	moll	81	India	2	moll_16	Plant_2	24 C	69 % RH	Z. m. o	female	30	9	0.4392	0.0253376	Left	Forewing	uns	int	NA	NA	NA	NA	3	0.07433	i	2	2016-10-11	NA
2725	moll	82	India	2	moll_19	Plant_2	24 C	69 % RH	B. mu.	female	30	7	0.4267	0.0250949	Left	Forewing	uns	wet	NA	NA	NA	NA	4	0.09885	d	4	2016-10-11	NA
2747	moll	83	India	2	moll_9	Plant_2	24 C	69 % RH	B. mi.	female	32	8	0.3782	0.0225991	Left	Forewing	uns	wet	NA	NA	NA	NA	3	0.07433	d	4	2016-10-09	NA
2779	moll	85	India	2	moll_39.5	Plant_2	24 C	69 % RH	B. mu.	female	26	8	0.5151	0.0308312	Left	Forewing	uns	wet	NA	NA	NA	NA	3	0.07433	w	4	2016-10-16	NA
2797	moll	86	India	2	moll_31	Plant_2	24 C	69 % RH	S. b.	male	29	8	0.3704	0.0247643	Left	Forewing	uns	dry	NA	NA	NA	NA	1	0.02026	d	2	2016-10-13	NA
2817	moll	87	India	2	moll_11	Plant_2	24 C	69 % RH	C. d.	male	32	8	0.3571	0.0221707	Left	Forewing	uns	int	NA	NA	NA	NA	2	0.04792	d	2	2016-10-10	NA
2839	moll	88	India	2	moll_27	Plant_2	24 C	69 % RH	C. d.	male	30	8	0.3022	0.0223688	Left	Forewing	uns	int	NA	NA	NA	NA	3	0.07433	d	2	2016-10-12	NA
2861	moll	89	India	2	moll_30	Plant_2	24 C	69 % RH	A. c.	female	29	8	0.49	0.0271853	Left	Forewing	uns	wet	NA	NA	NA	NA	4	0.09885	w	4	2016-10-13	NA
2887	moll	91	India	2	moll_11	Plant_2	24 C	69 % RH	C. d.	male	31	NA	0.3284	0.0222556	Left	Forewing	uns	int	NA	NA	NA	NA	2	0.04792	d	2	2016-10-12	NA
2889	moll	92	India	2	moll_40	Plant_2	24 C	69 % RH	Z. m. y	male	27	9	0.2957	0.0246748	Left	Forewing	uns	int	NA	NA	NA	NA	2	0.04792	w	2	2016-10-16	NA
2891	moll	93	India	2	moll_37	Plant_2	24 C	69 % RH	Z. m. o	female	29	NA	0.338	0.0240201	Left	Forewing	uns	dry	NA	NA	NA	NA	NA	NA	NA	NA	2016-10-14	NA
2893	moll	94	India	2	moll_35	Plant_2	24 C	69 % RH	Z. m. y	female	29	9	0.3876	0.0251418	Left	Forewing	uns	wet	NA	NA	NA	NA	4	0.09885	w	4	2016-10-14	NA
2895	moll	95	India	2	moll_31	Plant_2	24 C	69 % RH	S. b.	male	29	8	0.236	0.0213095	Left	Forewing	uns	int	NA	NA	NA	NA	2	0.04792	w	3	2016-10-13	NA
2897	moll	96	India	2	moll_16	Plant_2	24 C	69 % RH	Z. m. o	female	32	NA	0.2888	0.0206561	Left	Forewing	uns	int	NA	NA	NA	NA	2	0.04792	d	2	2016-10-11	NA
2899	moll	97	India	2	moll_14	Plant_2	24 C	69 % RH	B. mi.	female	32	7	0.4289	0.0235669	Left	Forewing	uns	wet	NA	NA	NA	NA	3	0.07433	w	3	2016-10-11	NA
2901	moll	98	India	2	moll_18	Plant_2	24 C	69 % RH	S. b.	female	32	7	0.4216	0.0234324	Left	Forewing	uns	wet	NA	NA	NA	NA	4	0.09885	w	4	2016-10-11	NA
2093	moll	109	India	2	moll_39	Plant_2	24 C	69 % RH	C. f.	female	31	10	0.4656	0.0250021	Left	Forewing	uns	dry	NA	NA	NA	NA	1	0.02026	d	2	2016-10-15	NA
2097	moll	110	India	2	moll_27	Plant_2	24 C	69 % RH	C. d.	female	35	8	0.291	0.0189334	Left	Forewing	uns	int	NA	NA	NA	NA	2	0.04792	d	3	2016-10-12	NA
2099	moll	111	India	2	moll_11	Plant_2	24 C	69 % RH	C. d.	male	37	7	0.3288	0.0186542	Left	Forewing	uns	int	NA	NA	NA	NA	3	0.07433	d	2	2016-10-10	NA
2101	moll	112	India	2	moll_20	Plant_2	24 C	69 % RH	B. mi.	female	35	9	0.3761	0.0206237	Left	Forewing	uns	int	NA	NA	NA	NA	3	0.07433	d	2	2016-10-12	NA
2103	moll	113	India	2	moll_31	Plant_2	24 C	69 % RH	S. b.	male	34	8	0.2649	0.0188893	Left	Forewing	uns	int	NA	NA	NA	NA	NA	NA	NA	NA	2016-10-13	NA
2105	moll	114	India	2	moll_17	Plant_2	24 C	69 % RH	O. c.	male	35	8	0.3161	0.0194629	Left	Forewing	uns	int	NA	NA	NA	NA	3	0.07433	d	3	2016-10-11	NA
2107	moll	121	India	2	moll_15	Plant_2	24 C	69 % RH	S. b.	male	37	8	0.2232	0.0163944	Left	Forewing	uns	dry	NA	NA	NA	NA	1	0.02026	w	1	2016-10-11	NA
2109	moll	122	India	2	moll_20	Plant_2	24 C	69 % RH	B. mi.	male	36	8	0.4236	0.0208617	Left	Forewing	uns	dry	NA	NA	NA	NA	1	0.02026	d	1	2016-10-12	NA
2111	moll	162	India	2	moll_20	Plant_2	24 C	69 % RH	B. mi.	male	39	10	0.4132	0.019098	Left	Forewing	uns	dry	NA	NA	NA	NA	1	0.02026	d	1	2016-10-12	NA
2113	moll	163	India	2	moll_17	Plant_2	24 C	69 % RH	O. c.	female	38	7	0.3156	0.0179169	Left	Forewing	uns	int	NA	NA	NA	NA	3	0.07433	d	2	2016-10-11	NA
2161	moll	441	India	2	moll_55	Plant_3	24 C	69 % RH	S. b.	male	22	8	0.3628	0.032419	Left	Forewing	uns	dry	NA	NA	NA	0.0126006	1	0.02026	d	0	2016-12-14	0.112252
2163	moll	442	India	2	moll_55	Plant_3	24 C	69 % RH	S. b.	male	22	8	0.3776	0.032854	Left	Forewing	uns	dry	NA	NA	NA	NA	1	0.02026	d	2	2016-12-14	NA
2165	moll	443	India	2	moll_55	Plant_3	24 C	69 % RH	S. b.	male	22	7	0.3767	0.0328279	Left	Forewing	uns	wet	NA	NA	NA	NA	3	0.07433	w	3	2016-12-14	NA
2167	moll	444	India	2	moll_64	Plant_3	24 C	69 % RH	E. i.	female	21	7	0.4437	0.0363198	Left	Forewing	uns	wet	NA	NA	NA	NA	4	0.09885	d	4	2016-12-15	NA
2169	moll	446	India	2	moll_62	Plant_3	24 C	69 % RH	E. i.	male	21	8	0.4824	0.0373465	Left	Forewing	uns	int	NA	NA	NA	NA	2	0.04792	w	4	2016-12-14	NA
2171	moll	449	India	2	moll_93	Plant_3	24 C	69 % RH	S. b.	male	20	8	0.3845	0.0363582	Left	Forewing	uns	wet	NA	NA	NA	0.0813857	4	0.09885	w	4	2016-12-18	0.285282
2173	moll	450	India	2	moll_64	Plant_3	24 C	69 % RH	E. i.	male	23	9	0.4332	0.0328979	Left	Forewing	uns	dry	NA	NA	NA	NA	1	0.02026	d	1	2016-12-15	NA
2175	moll	451	India	2	moll_64	Plant_3	24 C	69 % RH	E. i.	male	23	8	0.4483	0.0332758	Left	Forewing	uns	wet	NA	NA	NA	0.0641777	3	0.07433	w	4	2016-12-15	0.253333
2177	moll	452	India	2	moll_58	Plant_3	24 C	69 % RH	R. c.	male	24	10	0.4918	0.0328891	Left	Forewing	uns	dry	NA	NA	NA	NA	1	0.02026	d	0	2016-12-14	NA
2179	moll	453	India	2	moll_60	Plant_3	24 C	69 % RH	C. d.	male	24	10	0.3971	0.0306259	Left	Forewing	uns	dry	102.456	NA	NA	0.0124649	1	0.02026	d	0	2016-12-14	0.111646
2181	moll	454	India	2	moll_55	Plant_3	24 C	69 % RH	S. b.	male	25	9	0.4125	0.0297761	Left	Forewing	uns	int	NA	NA	NA	NA	2	0.04792	d	3	2016-12-14	NA
2183	moll	456	India	2	moll_104	Plant_3	24 C	69 % RH	E. i.	male	20	6	0.4094	0.0371267	Left	Forewing	uns	wet	NA	NA	NA	NA	4	0.09885	w	4	2016-12-19	NA
2185	moll	458	India	2	moll_62	Plant_3	24 C	69 % RH	E. i.	female	25	9	0.3611	0.0284841	Left	Forewing	uns	wet	NA	NA	NA	NA	3	0.07433	d	4	2016-12-14	NA
2187	moll	459	India	2	moll_74	Plant_3	24 C	69 % RH	S. b.	female	25	9	0.4567	0.0308038	Left	Forewing	uns	wet	NA	NA	NA	0.0788207	4	0.09885	w	4	2016-12-15	0.28075
2189	moll	461	India	2	moll_74	Plant_3	24 C	69 % RH	S. b.	female	24	10	0.3907	0.0304605	Left	Forewing	uns	int	NA	NA	NA	NA	2	0.04792	d	3	2016-12-15	NA
2191	moll	462	India	2	moll_82	Plant_3	24 C	69 % RH	S. b.	female	22	8	0.3807	0.0329436	Left	Forewing	uns	wet	NA	NA	NA	NA	4	0.09885	w	4	2016-12-18	NA
2193	moll	463	India	2	moll_82	Plant_3	24 C	69 % RH	S. b.	male	22	9	0.3764	0.0328191	Left	Forewing	uns	int	NA	NA	NA	NA	2	0.04792	w	2	2016-12-18	NA
2195	moll	464	India	2	moll_64	Plant_3	24 C	69 % RH	E. i.	female	25	10	0.4699	0.0310977	Left	Forewing	uns	dry	NA	NA	NA	NA	1	0.02026	d	0	2016-12-15	NA
2197	moll	465	India	2	moll_55	Plant_3	24 C	69 % RH	S. b.	male	27	8	0.3063	0.0249662	Left	Forewing	uns	int	NA	NA	NA	NA	1	0.02026	w	3	2016-12-14	NA
2199	moll	466	India	2	moll_82	Plant_3	24 C	69 % RH	S. b.	female	22	9	0.4243	0.0341561	Left	Forewing	uns	dry	NA	NA	NA	NA	1	0.02026	d	2	2016-12-18	NA
2201	moll	467	India	2	moll_100	Plant_3	24 C	69 % RH	E. i.	male	23	8	0.3169	0.0296424	Left	Forewing	uns	wet	NA	NA	NA	NA	3	0.07433	w	4	2016-12-18	NA
2203	moll	468	India	2	moll_64	Plant_3	24 C	69 % RH	E. i.	female	25	8	0.4613	0.0309068	Left	Forewing	uns	wet	NA	NA	NA	NA	3	0.07433	w	4	2016-12-15	NA
2205	moll	469	India	2	moll_58	Plant_3	24 C	69 % RH	R. c.	female	27	10	0.4546	0.0284782	Left	Forewing	uns	dry	NA	NA	NA	0.0545748	1	0.02026	d	1	2016-12-14	0.233612
2207	moll	471	India	2	moll_81	Plant_3	24 C	69 % RH	R. c.	male	23	9	0.4654	0.0336936	Left	Forewing	uns	dry	94.1829	NA	NA	0.0335008	1	0.02026	d	2	2016-12-17	0.183032
2209	moll	472	India	2	moll_68	Plant_3	24 C	69 % RH	A. c.	male	27	9	0.3849	0.0269413	Left	Forewing	uns	dry	NA	NA	NA	NA	1	0.02026	d	2	2016-12-15	NA
2211	moll	473	India	2	moll_91	Plant_3	24 C	69 % RH	Z. m. y	female	24	7	0.3168	0.0284043	Left	Forewing	uns	wet	NA	NA	NA	NA	4	0.09885	w	4	2016-12-18	NA
2213	moll	474	India	2	moll_81	Plant_3	24 C	69 % RH	R. c.	male	23	9	0.3869	0.0316815	Left	Forewing	uns	dry	NA	NA	NA	NA	1	0.02026	d	2	2016-12-17	NA
2215	moll	475	India	2	moll_60	Plant_3	24 C	69 % RH	C. d.	female	27	10	0.3373	0.0257815	Left	Forewing	uns	dry	NA	NA	NA	0.0127962	1	0.02026	d	1	2016-12-14	0.11312
2217	moll	476	India	2	moll_60	Plant_3	24 C	69 % RH	C. d.	male	26	10	0.4118	0.0286147	Left	Forewing	uns	dry	100.32	NA	NA	0.0184188	1	0.02026	d	2	2016-12-14	0.135716
2219	moll	477	India	2	moll_84	Plant_3	24 C	69 % RH	A. c.	female	24	9	0.449	0.0319059	Left	Forewing	uns	int	NA	NA	NA	0.0496396	2	0.04792	d	2	2016-12-18	0.2228
2221	moll	480	India	2	moll_84	Plant_3	24 C	69 % RH	A. c.	female	24	9	0.4305	0.0314615	Left	Forewing	uns	wet	NA	NA	NA	NA	3	0.07433	d	3	2016-12-18	NA
2223	moll	481	India	2	moll_56	Plant_3	24 C	69 % RH	P. s.	female	28	9	0.3867	0.0260196	Left	Forewing	uns	int	NA	NA	NA	NA	2	0.04792	d	3	2016-12-14	NA
2225	moll	482	India	2	moll_65	Plant_3	24 C	69 % RH	B. mi.	female	27	9	0.3703	0.0265963	Left	Forewing	uns	wet	NA	NA	NA	0.074243	3	0.07433	w	3	2016-12-15	0.272476
2227	moll	483	India	2	moll_55	Plant_3	24 C	69 % RH	S. b.	female	29	8	0.2835	0.0226527	Left	Forewing	uns	int	NA	NA	NA	NA	2	0.04792	d	3	2016-12-14	NA
2229	moll	486	India	2	moll_81	Plant_3	24 C	69 % RH	R. c.	male	26	10	0.5779	0.0320364	Left	Forewing	uns	dry	NA	NA	NA	NA	1	0.02026	w	1	2016-12-17	NA
2231	moll	488	India	2	moll_60	Plant_3	24 C	69 % RH	C. d.	female	28	10	0.3736	0.0257224	Left	Forewing	uns	dry	NA	NA	NA	0.0126522	1	0.02026	d	2	2016-12-14	0.112482
2233	moll	489	India	2	moll_82	Plant_3	24 C	69 % RH	S. b.	male	25	8	0.2965	0.0266728	Left	Forewing	uns	dry	NA	NA	NA	0.0212941	1	0.02026	d	1	2016-12-18	0.145925
2235	moll	490	India	2	moll_89	Plant_3	24 C	69 % RH	A. c.	male	25	9	0.4692	0.0310823	Left	Forewing	uns	dry	NA	NA	NA	NA	1	0.02026	d	1	2016-12-18	NA
2237	moll	491	India	2	moll_91	Plant_3	24 C	69 % RH	Z. m. y	female	25	8	0.3526	0.0282588	Left	Forewing	uns	wet	NA	NA	NA	NA	3	0.07433	w	4	2016-12-18	NA
2239	moll	492	India	2	moll_88	Plant_3	24 C	69 % RH	C. d.	female	25	8	0.3351	0.0277834	Left	Forewing	uns	int	NA	NA	NA	NA	2	0.04792	d	3	2016-12-18	NA
2241	moll	505	India	2	moll_104	Plant_3	24 C	69 % RH	E. i.	female	25	10	0.4524	0.0307068	Left	Forewing	uns	dry	NA	NA	NA	NA	1	0.02026	d	0	2016-12-19	NA
2243	moll	507	India	2	moll_66	Plant_3	24 C	69 % RH	P. p.	female	29	10	0.5165	0.0276668	Left	Forewing	uns	dry	NA	NA	NA	NA	1	0.02026	d	0	2016-12-15	NA
2245	moll	508	India	2	moll_60	Plant_3	24 C	69 % RH	C. d.	male	30	9	0.3729	0.0239925	Left	Forewing	uns	dry	99.1578	NA	NA	0.00574701	1	0.02026	d	0	2016-12-14	0.0758091
2247	moll	509	India	2	moll_53	Plant_3	24 C	69 % RH	O. c.	female	31	7	0.3791	0.0233466	Left	Forewing	uns	wet	NA	NA	NA	NA	4	0.09885	w	4	2016-12-14	NA
2249	moll	511	India	2	moll_91	Plant_3	24 C	69 % RH	Z. m. y	female	26	8	0.4524	0.0295257	Left	Forewing	uns	wet	NA	NA	NA	NA	4	0.09885	w	4	2016-12-18	NA
2251	moll	512	India	2	moll_88	Plant_3	24 C	69 % RH	C. d.	male	26	11	0.474	0.0299884	Left	Forewing	uns	dry	NA	NA	NA	0	1	0.02026	d	0	2016-12-18	0
2253	moll	513	India	2	moll_66	Plant_3	24 C	69 % RH	P. p.	male	30	10	0.5249	0.0268888	Left	Forewing	uns	dry	NA	NA	NA	NA	1	0.02026	d	3	2016-12-15	NA
2255	moll	514	India	2	moll_91	Plant_3	24 C	69 % RH	Z. m. y	male	28	8	0.232	0.0219451	Left	Forewing	uns	wet	NA	NA	NA	NA	NA	NA	NA	NA	2016-12-18	NA
2257	moll	516	India	2	moll_53	Plant_3	24 C	69 % RH	O. c.	male	32	9	0.3706	0.0224467	Left	Forewing	uns	int	NA	NA	NA	NA	2	0.04792	w	2	2016-12-14	NA
2259	moll	518	India	2	moll_53	Plant_3	24 C	69 % RH	O. c.	male	32	9	0.3453	0.0219238	Left	Forewing	uns	dry	NA	NA	NA	NA	1	0.02026	d	1	2016-12-14	NA
2261	moll	519	India	2	moll_110	Plant_3	24 C	69 % RH	M. r.	female	27	9	0.2901	0.024518	Left	Forewing	uns	dry	NA	NA	NA	NA	1	0.02026	d	2	2016-12-19	NA
2263	moll	520	India	2	moll_56	Plant_3	24 C	69 % RH	P. s.	male	32	8	0.3741	0.0225171	Left	Forewing	uns	int	NA	NA	NA	NA	2	0.04792	d	2	2016-12-14	NA
2265	moll	521	India	2	moll_107	Plant_3	24 C	69 % RH	C. h..	female	28	8	0.4217	0.026782	Left	Forewing	uns	int	NA	NA	NA	NA	2	0.04792	d	3	2016-12-19	NA
2267	moll	522	India	2	moll_71	Plant_3	24 C	69 % RH	P. p.	male	32	11	0.3704	0.0224426	Left	Forewing	uns	dry	NA	NA	NA	NA	1	0.02026	d	0	2016-12-15	NA
2269	moll	523	India	2	moll_71	Plant_3	24 C	69 % RH	P. p.	female	33	10	0.3983	0.0222958	Left	Forewing	uns	dry	104.488	NA	NA	0.0577544	1	0.02026	d	1	2016-12-15	0.240322
2271	moll	524	India	2	moll_75	Plant_3	24 C	69 % RH	O. c.	male	33	9	0.3169	0.0206598	Left	Forewing	uns	int	NA	NA	NA	NA	2	0.04792	w	3	2016-12-15	NA
2273	moll	525	India	2	moll_94	Plant_3	24 C	69 % RH	C. f.	female	30	9	0.3533	0.0235646	Left	Forewing	uns	dry	NA	NA	NA	NA	1	0.02026	d	3	2016-12-18	NA
2275	moll	526	India	2	moll_107	Plant_3	24 C	69 % RH	C. h..	female	29	8	0.3352	0.0239536	Left	Forewing	uns	int	NA	NA	NA	NA	2	0.04792	d	3	2016-12-19	NA
2277	moll	528	India	2	moll_56	Plant_3	24 C	69 % RH	P. s.	male	35	9	0.4088	0.0212049	Left	Forewing	uns	dry	NA	NA	NA	NA	1	0.02026	d	0	2016-12-14	NA
2279	moll	530	India	2	moll_63	Plant_3	24 C	69 % RH	M. r.	female	34	10	0.448	0.0225051	Left	Forewing	uns	dry	NA	NA	NA	NA	1	0.02026	d	0	2016-12-15	NA
2281	moll	533	India	2	moll_66	Plant_3	24 C	69 % RH	P. p.	female	36	10	0.5608	0.0229069	Left	Forewing	uns	dry	NA	NA	NA	0.00759861	1	0.02026	d	0	2016-12-15	0.08717
2283	moll	534	India	2	moll_71	Plant_3	24 C	69 % RH	P. p.	male	36	9	0.3919	0.0203277	Left	Forewing	uns	dry	NA	NA	NA	NA	1	0.02026	d	0	2016-12-15	NA
2285	moll	536	India	2	moll_99	Plant_3	24 C	69 % RH	M. r.	female	NA	8	0.2683	NA	Left	Forewing	uns	int	NA	NA	NA	NA	2	0.04792	w	3	2017-12-18	NA
2287	moll	546	India	2	moll_105	Plant_3	24 C	69 % RH	C. h..	male	37	10	0.2556	0.0171522	Left	Forewing	uns	int	NA	NA	NA	NA	2	0.04792	d	1	2016-12-19	NA
2289	moll	547	India	2	moll_83	Plant_3	24 C	69 % RH	C. f.	male	38	9	0.2556	0.0167008	Left	Forewing	uns	dry	NA	NA	NA	0.00578344	1	0.02026	d	0	2016-12-18	0.0760489
2291	moll	548	India	2	moll_71	Plant_3	24 C	69 % RH	P. p.	female	41	9	0.43	0.0184094	Left	Forewing	uns	dry	NA	NA	NA	NA	1	0.02026	d	1	2016-12-15	NA
2293	moll	549	India	2	moll_105	Plant_3	24 C	69 % RH	C. h..	male	39	8	0.4296	0.0193474	Left	Forewing	uns	dry	NA	NA	NA	NA	1	0.02026	d	0	2016-12-19	NA
2295	moll	550	India	2	moll_83	Plant_3	24 C	69 % RH	C. f.	male	40	8	0.317	0.0170462	Left	Forewing	uns	dry	83.3674	NA	NA	0.0070008	1	0.02026	d	0	2016-12-18	0.0836708
2297	moll	566	India	2	moll_121	Plant_4	24 C	69 % RH	Z. m. y	female	23	8	0.297	0.0290084	Left	Forewing	uns	wet	NA	NA	1.0015	0.113872	4	0.09885	w	4	2017-04-21	0.33745
2305	moll	600	India	2	moll_122	Plant_4	24 C	69 % RH	C. h..	female	39	8	0.3995	0.0188846	Left	Forewing	uns	wet	NA	NA	NA	0.0624734	3	0.07433	w	4	2017-04-21	0.249947
2307	moll	601	India	2	moll_129	Plant_4	24 C	69 % RH	S. b.	male	20	NA	0.4288	0.0377041	Left	Forewing	uns	wet	116.438	NA	1.7104	0.0699471	3	0.07433	w	4	2017-05-12	0.264475
2309	moll	603	India	2	moll_130	Plant_4	24 C	69 % RH	Z. m. y	female	17	NA	0.4907	0.046397	Left	Forewing	uns	wet	134.739	NA	3.2307	0.102013	4	0.09885	w	4	2017-05-18	0.319394
2311	moll	604	India	2	moll_131	Plant_4	24 C	69 % RH	Z. m. y	female	19	NA	0.3445	0.0368957	Left	Forewing	uns	wet	98.2853	NA	1.1548	0.0893536	3	0.07433	w	4	2017-05-18	0.298921
2313	moll	605	India	2	moll_131	Plant_4	24 C	69 % RH	Z. m. y	male	20	7	0.2905	0.0331145	Left	Forewing	uns	wet	89.8268	NA	0.5465	0.0701423	3	0.07433	w	4	2017-05-18	0.264844
2315	moll	606	India	2	moll_130	Plant_4	24 C	69 % RH	Z. m. y	female	20	NA	0.3721	0.0359631	Left	Forewing	uns	wet	111.387	NA	2.0097	0.0945633	4	0.09885	w	4	2017-05-18	0.307512
2317	moll	607	India	2	moll_130	Plant_4	24 C	69 % RH	Z. m. y	female	20	NA	0.467	0.038792	Left	Forewing	uns	wet	115.677	NA	1.9777	0.0768109	3	0.07433	w	4	2017-05-18	0.277148
2319	moll	608	India	2	moll_122	Plant_4	24 C	69 % RH	C. h..	male	21	9	0.4215	0.0147015	Left	Forewing	uns	int	122.058	NA	3.0261	0.0408778	2	0.04792	d	3	2017-04-21	0.202182
2321	moll	609	India	2	moll_124	Plant_4	24 C	69 % RH	D. s.	female	44	9	0.3714	0.0163366	Left	Forewing	uns	int	115.345	NA	3.4691	0.0468665	2	0.04792	d	3	2017-04-26	0.216487
2325	moll	611	India	2	moll_134	Plant_4	24 C	69 % RH	M. r.	male	17	9	0.3622	0.0419309	Left	Forewing	uns	wet	102.662	NA	1.1643	0.0805149	3	0.07433	w	4	2017-05-26	0.283752
2327	moll	612	India	2	moll_134	Plant_4	24 C	69 % RH	M. r.	male	18	10	0.4247	0.0417595	Left	Forewing	uns	wet	113.808	NA	1.574	0.0583208	3	0.07433	w	4	2017-05-26	0.241497
2329	moll	614	India	2	moll_134	Plant_4	24 C	69 % RH	M. r.	female	21	9	0.3704	0.0341983	Left	Forewing	uns	wet	108.818	NA	2.6671	0.0553915	3	0.07433	w	3	2017-05-26	0.235354
2331	moll	615	India	2	moll_134	Plant_4	24 C	69 % RH	E. i.	male	23	8	0.3598	0.0309238	Left	Forewing	uns	wet	93.6347	NA	2.0703	0.0632944	3	0.07433	d	4	2017-05-26	0.251584
2333	moll	616	India	2	moll_132	Plant_4	24 C	69 % RH	R. c.	male	23	8	0.4825	0.0341013	Left	Forewing	uns	wet	117.757	NA	1.3224	0.0752047	3	0.07433	w	4	2017-05-25	0.274235
2335	moll	617	India	2	moll_139	Plant_4	24 C	69 % RH	R. c.	male	23	9	0.5694	0.0360367	Left	Forewing	uns	wet	138.081	NA	2.3021	0.0478467	3	0.07433	w	4	2017-05-28	0.218739
2337	moll	618	India	2	moll_143	Plant_4	24 C	69 % RH	S. b.	male	20	NA	0.2928	0.0332017	Left	Forewing	uns	wet	82.7467	NA	1.0947	0.0730072	3	0.07433	w	4	2017-05-30	0.270198
2339	moll	619	India	2	moll_132	Plant_4	24 C	69 % RH	R. c.	male	25	NA	0.485	0.0314273	Left	Forewing	uns	wet	123.822	NA	3.2594	0.062513	3	0.07433	w	4	2017-05-25	0.250026
2343	moll	620	India	2	moll_139	Plant_4	24 C	69 % RH	R. c.	male	23	9	0.4886	0.0342444	Left	Forewing	uns	int	115.81	NA	2.1338	0.0504003	2	0.04792	w	3	2017-05-28	0.2245
2345	moll	621	India	2	moll_133	Plant_4	24 C	69 % RH	P. s.	male	26	9	0.5074	0.0306768	Left	Forewing	uns	int	122.844	NA	2.4055	0.0443631	2	0.04792	w	4	2017-05-25	0.210625
2347	moll	622	India	2	moll_140	Plant_4	24 C	69 % RH	E. i.	female	23	8	0.5163	0.0348797	Left	Forewing	uns	wet	135.066	NA	2.6004	0.0843798	3	0.07433	w	4	2017-05-29	0.290482
2349	moll	624	India	2	moll_133	Plant_4	24 C	69 % RH	P. s.	female	26	9	0.4435	0.0293308	Left	Forewing	uns	wet	126.582	NA	2.8471	0.059418	3	0.07433	w	4	2017-05-25	0.243758
2351	moll	625	India	2	moll_136	Plant_4	24 C	69 % RH	P. s.	male	23	9	0.4725	0.0338641	Left	Forewing	uns	wet	132.254	NA	2.8372	0.0865297	3	0.07433	w	4	2017-05-28	0.294159
2353	moll	626	India	2	moll_133	Plant_4	24 C	69 % RH	P. s.	female	27	NA	0.5645	0.0306096	Left	Forewing	uns	int	137.79	NA	3.7261	0.0499991	2	0.04792	d	3	2017-05-25	0.223605
2355	moll	627	India	2	moll_139	Plant_4	24 C	69 % RH	R. c.	female	23	9	0.4544	0.033426	Left	Forewing	uns	wet	129.666	NA	2.3155	0.084576	3	0.07433	w	4	2017-05-28	0.29082
2359	moll	630	India	2	moll_132	Plant_4	24 C	69 % RH	R. c.	female	27	NA	0.5448	0.0302493	Left	Forewing	uns	wet	145.937	NA	3.1939	0.103123	4	0.09885	w	3	2017-05-25	0.321128
2361	moll	631	India	2	moll_169	Plant_4	24 C	69 % RH	P. p.	female	16	10	0.4922	0.049347	Left	Forewing	uns	wet	129.685	NA	3.2085	0.0747389	3	0.07433	w	4	2017-06-07	0.273384
2363	moll	632	India	2	moll_143	Plant_4	24 C	69 % RH	S. b.	male	24	8	0.4052	0.0308327	Left	Forewing	uns	wet	113.662	NA	1.7735	0.0764749	3	0.07433	w	3	2017-05-30	0.276541
2365	moll	633	India	2	moll_132	Plant_4	24 C	69 % RH	R. c.	male	30	9	0.362	0.0237565	Left	Forewing	uns	wet	107.637	NA	1.4309	0.0677251	3	0.07433	w	3	2017-05-25	0.260241
2367	moll	634	India	2	moll_135	Plant_4	24 C	69 % RH	P. p.	male	27	NA	0.4716	0.0288289	Left	Forewing	uns	wet	126.39	NA	2.8945	0.0477086	3	0.07433	w	3	2017-05-26	0.218423
2369	moll	635	India	2	moll_135	Plant_4	24 C	69 % RH	P. p.	male	29	9	0.3734	0.024831	Left	Forewing	uns	int	84.3856	NA	2.306	0.0283782	2	0.04792	d	3	2017-05-26	0.168458
2371	moll	636	India	2	moll_135	Plant_4	24 C	69 % RH	P. p.	male	29	9	0.3157	0.0234798	Left	Forewing	uns	wet	94.6449	NA	1.0284	0.0711526	3	0.07433	w	4	2017-05-26	0.266745
2373	moll	637	India	2	moll_178	Plant_4	24 C	69 % RH	E. i.	female	14	8	0.4227	0.0536063	Left	Forewing	uns	wet	121.065	NA	1.2575	0.0968785	4	0.09885	w	4	2017-06-09	0.311253
2375	moll	638	India	2	moll_156	Plant_4	24 C	69 % RH	P. p.	male	21	NA	0.4191	0.0356358	Left	Forewing	uns	wet	NA	NA	NA	NA	3	0.07433	w	4	2017-06-04	NA
2377	moll	639	India	2	moll_176	Plant_4	24 C	69 % RH	S. b.	male	16	NA	0.386	0.0455067	Left	Forewing	uns	wet	101.754	NA	0.9424	0.113544	4	0.09885	w	4	2017-06-09	0.336963
2381	moll	640	India	2	moll_181	Plant_4	24 C	69 % RH	S. b.	male	15	NA	0.414	0.0496869	Left	Forewing	uns	wet	107.404	NA	1.0229	0.0693299	3	0.07433	w	4	2017-06-10	0.263306
2383	moll	641	India	2	moll_146	Plant_4	24 C	69 % RH	S. b.	female	24	9	0.3863	0.0303457	Left	Forewing	uns	wet	120.008	NA	1.8206	0.0780937	3	0.07433	w	4	2017-06-01	0.279453
2385	moll	642	India	2	moll_178	Plant_4	24 C	69 % RH	E. i.	male	16	9	0.4339	0.0473162	Left	Forewing	uns	wet	106.541	NA	1.1506	0.0735222	3	0.07433	w	4	2017-06-09	0.27115
2387	moll	643	India	2	moll_146	Plant_4	24 C	69 % RH	S. b.	male	24	8	0.3614	0.0296792	Left	Forewing	uns	wet	96.0111	NA	1.0593	0.0761797	3	0.07433	w	3	2017-06-01	0.276007
2389	moll	644	India	2	moll_170	Plant_4	24 C	69 % RH	S. b.	female	18	8	0.4915	0.0438432	Left	Forewing	uns	wet	144.953	NA	3.5218	0.0639877	3	0.07433	w	4	2017-06-07	0.252958
2391	moll	645	India	2	moll_170	Plant_4	24 C	69 % RH	S. b.	male	18	NA	0.3321	0.0384725	Left	Forewing	uns	wet	91.3279	NA	0.7596	0.0535984	3	0.07433	w	4	2017-06-07	0.231513
2393	moll	646	India	2	moll_171	Plant_4	24 C	69 % RH	O. c.	male	18	9	0.4013	0.040978	Left	Forewing	uns	wet	109.885	NA	0.9198	0.0866683	3	0.07433	w	4	2017-06-07	0.294395
2395	moll	647	India	2	moll_139	Plant_4	24 C	69 % RH	R. c.	female	29	9	0.4946	0.0272701	Left	Forewing	uns	wet	139.956	NA	3.5487	0.0694585	3	0.07433	w	3	2017-05-28	0.26355
2397	moll	648	India	2	moll_171	Plant_4	24 C	69 % RH	O. c.	female	19	8	0.4249	0.0395678	Left	Forewing	uns	wet	121.923	NA	2.3129	0.0674327	3	0.07433	w	4	2017-06-07	0.259678
2399	moll	649	India	2	moll_176	Plant_4	24 C	69 % RH	S. b.	male	17	9	0.3488	0.0414073	Left	Forewing	uns	wet	95.9716	NA	0.9228	0.0624827	3	0.07433	w	4	2017-06-09	0.249965
2403	moll	650	India	2	moll_171	Plant_4	24 C	69 % RH	O. c.	male	19	8	0.3886	0.0384073	Left	Forewing	uns	wet	112.622	NA	0.9153	0.0480898	3	0.07433	w	4	2017-06-07	0.219294
2405	moll	651	India	2	moll_154	Plant_4	24 C	69 % RH	O. c.	male	22	8	0.3824	0.0329926	Left	Forewing	uns	wet	91.9075	NA	1.0024	0.0784895	3	0.07433	w	4	2017-06-04	0.28016
2407	moll	652	India	2	moll_161	Plant_4	24 C	69 % RH	C. d.	male	21	NA	0.3781	0.0344336	Left	Forewing	uns	wet	105.413	NA	1.2593	0.0538788	3	0.07433	w	4	2017-06-05	0.232118
2409	moll	653	India	2	moll_189	Plant_4	24 C	69 % RH	E. i.	male	15	8	0.4427	0.0508095	Left	Forewing	uns	wet	109.378	NA	1.4002	0.0874498	3	0.07433	w	4	2017-06-13	0.295719
2411	moll	654	India	2	moll_177	Plant_4	24 C	69 % RH	P. p.	male	19	NA	0.3535	0.0372143	Left	Forewing	uns	wet	104.193	NA	1.4013	0.0775452	3	0.07433	w	4	2017-06-09	0.278469
2413	moll	655	India	2	moll_184	Plant_4	24 C	69 % RH	E. i.	male	17	8	0.3669	0.0421115	Left	Forewing	uns	wet	92.5871	NA	0.5902	0.0882898	3	0.07433	w	4	2017-06-11	0.297136
2415	moll	656	India	2	moll_171	Plant_4	24 C	69 % RH	O. c.	male	20	8	0.3971	0.0367511	Left	Forewing	uns	wet	111.099	NA	1.2859	0.0792499	3	0.07433	w	4	2017-06-07	0.281514
2417	moll	657	India	2	moll_177	Plant_4	24 C	69 % RH	P. p.	male	19	NA	0.3321	0.0364476	Left	Forewing	uns	wet	100.941	NA	1.21	0.0537404	3	0.07433	w	4	2017-06-09	0.23182
2419	moll	658	India	2	moll_181	Plant_4	24 C	69 % RH	S. b.	male	18	7	0.379	0.0402044	Left	Forewing	uns	wet	106.074	NA	0.7132	0.0726649	3	0.07433	w	4	2017-06-10	0.269564
2421	moll	659	India	2	moll_173	Plant_4	24 C	69 % RH	Z. m. y	female	19	8	0.2906	0.0348614	Left	Forewing	uns	wet	86.8726	NA	1.5528	0.0630918	3	0.07433	w	4	2017-06-09	0.251181
2423	moll	660	India	2	moll_156	Plant_4	24 C	69 % RH	P. p.	male	22	10	0.4505	0.0348451	Left	Forewing	uns	wet	115.859	NA	1.9392	0.0569046	3	0.07433	w	3	2017-06-04	0.238547
2425	moll	661	India	2	moll_171	Plant_4	24 C	69 % RH	O. c.	male	20	9	0.3703	0.035905	Left	Forewing	uns	wet	102.873	NA	1.826	0.0612784	3	0.07433	w	3	2017-06-07	0.247545
2427	moll	662	India	2	moll_144	Plant_4	24 C	69 % RH	P. p.	male	28	8	0.393	0.0261601	Left	Forewing	uns	int	108.524	NA	1.5341	0.0517448	2	0.04792	w	3	2017-05-31	0.227475
2429	moll	663	India	2	moll_172	Plant_4	24 C	69 % RH	R. c.	male	18	8	0.486	0.043679	Left	Forewing	uns	wet	123.311	NA	1.0482	0.0689561	3	0.07433	w	4	2017-06-09	0.262595
2431	moll	664	India	2	moll_178	Plant_4	24 C	69 % RH	E. i.	female	18	8	0.4573	0.0428017	Left	Forewing	uns	wet	133.505	NA	2.1126	0.0947939	4	0.09885	w	4	2017-06-09	0.307886
2433	moll	665	India	2	moll_176	Plant_4	24 C	69 % RH	S. b.	female	18	8	0.4015	0.0409848	Left	Forewing	uns	wet	126.431	NA	2.5262	0.0919664	4	0.09885	w	4	2017-06-09	0.30326
2435	moll	666	India	2	moll_170	Plant_4	24 C	69 % RH	S. b.	male	21	6	0.3701	0.0341891	Left	Forewing	uns	wet	106.675	NA	1.6571	0.0695162	3	0.07433	w	4	2017-06-07	0.263659
2437	moll	667	India	2	moll_178	Plant_4	24 C	69 % RH	E. i.	female	18	7	0.4488	0.0425349	Left	Forewing	uns	wet	123.557	NA	1.876	0.100486	3	0.07433	w	4	2017-06-09	0.316995
2439	moll	668	India	2	moll_156	Plant_4	24 C	69 % RH	P. p.	female	23	8	0.4312	0.0328472	Left	Forewing	uns	wet	124.567	NA	2.478	0.0752305	3	0.07433	w	4	2017-06-04	0.274282
2441	moll	669	India	2	moll_178	Plant_4	24 C	69 % RH	E. i.	female	18	NA	0.471	0.0432249	Left	Forewing	uns	wet	127.315	NA	2.5767	0.0934998	3	0.07433	w	4	2017-06-09	0.305777
2443	moll	670	India	2	moll_176	Plant_4	24 C	69 % RH	S. b.	male	18	8	0.3645	0.039685	Left	Forewing	uns	wet	103.66	NA	0.9663	0.0810589	3	0.07433	w	4	2017-06-09	0.284708
2445	moll	671	India	2	moll_177	Plant_4	24 C	69 % RH	P. p.	male	20	7	0.311	0.0338758	Left	Forewing	uns	wet	88.5521	NA	0.8727	0.0607367	3	0.07433	w	4	2017-06-09	0.246448
2447	moll	672	India	2	moll_184	Plant_4	24 C	69 % RH	E. i.	male	18	8	0.4698	0.0431882	Left	Forewing	uns	wet	108.413	NA	0.8501	0.0766116	3	0.07433	w	4	2017-06-11	0.276788
2449	moll	673	India	2	moll_183	Plant_4	24 C	69 % RH	S. b.	female	18	7	0.3586	0.0394697	Left	Forewing	uns	wet	113.77	NA	1.489	0.0941151	4	0.09885	w	4	2017-06-11	0.306782
2451	moll	674	India	2	moll_177	Plant_4	24 C	69 % RH	P. p.	female	20	7	0.4127	0.0372262	Left	Forewing	uns	wet	131.604	NA	3.1441	0.0731579	3	0.07433	w	4	2017-06-09	0.270477
2453	moll	675	India	2	moll_176	Plant_4	24 C	69 % RH	S. b.	female	20	7	0.3787	0.0361744	Left	Forewing	uns	wet	124.992	NA	2.4197	0.0959216	4	0.09885	w	4	2017-06-09	0.309712
2455	moll	676	India	2	moll_184	Plant_4	24 C	69 % RH	E. i.	male	18	7	0.424	0.0417365	Left	Forewing	uns	wet	102.287	NA	0.4244	0.0614906	3	0.07433	w	4	2017-06-11	0.247973
2457	moll	677	India	2	moll_176	Plant_4	24 C	69 % RH	S. b.	female	20	7	0.3571	0.0354732	Left	Forewing	uns	wet	112.507	NA	NA	0.0919303	3	0.07433	w	4	2017-06-09	0.3032
2459	moll	678	India	2	moll_154	Plant_4	24 C	69 % RH	O. c.	female	25	7	0.3671	0.028641	Left	Forewing	uns	wet	121.985	NA	2.0111	0.109892	4	0.09885	w	4	2017-06-04	0.3315
2461	moll	679	India	2	moll_156	Plant_4	24 C	69 % RH	P. p.	female	25	8	0.3922	0.0292794	Left	Forewing	uns	wet	116.981	NA	2.4837	0.0757269	3	0.07433	w	4	2017-06-04	0.275185
2463	moll	680	India	2	moll_170	Plant_4	24 C	69 % RH	S. b.	female	22	8	0.3891	0.0331842	Left	Forewing	uns	wet	111.215	NA	2.0713	0.0633787	2	0.04792	w	4	2017-06-07	0.251751
2465	moll	681	India	2	moll_181	Plant_4	24 C	69 % RH	S. b.	male	19	7	0.386	0.0383215	Left	Forewing	uns	wet	112.613	NA	1.6275	0.0520465	2	0.04792	w	4	2017-06-10	0.228137
2467	moll	682	India	2	moll_181	Plant_4	24 C	69 % RH	S. b.	female	19	8	0.4026	0.0388631	Left	Forewing	uns	wet	120.279	NA	2.9227	0.0633492	3	0.07433	w	4	2017-06-10	0.251693
2469	moll	683	India	2	moll_185	Plant_4	24 C	69 % RH	P. s.	female	19	9	0.4423	0.0401007	Left	Forewing	uns	wet	123.584	NA	3.8417	0.0838963	3	0.07433	w	4	2017-06-11	0.289649
2471	moll	684	India	2	moll_184	Plant_4	24 C	69 % RH	E. i.	male	19	8	0.4562	0.0405165	Left	Forewing	uns	wet	112.582	NA	0.7098	0.0700773	3	0.07433	w	4	2017-06-11	0.264721
2473	moll	685	India	2	moll_189	Plant_4	24 C	69 % RH	E. i.	male	18	8	0.4803	0.0435076	Left	Forewing	uns	wet	121.445	NA	1.5286	0.0783763	3	0.07433	w	4	2017-06-13	0.279958
2475	moll	686	India	2	moll_177	Plant_4	24 C	69 % RH	P. p.	male	21	8	0.3351	0.0330754	Left	Forewing	uns	wet	90.6829	NA	1.2113	0.055338	3	0.07433	w	3	2017-06-09	0.23524
2477	moll	687	India	2	moll_189	Plant_4	24 C	69 % RH	E. i.	male	17	9	0.4259	0.0442575	Left	Forewing	uns	wet	117.002	NA	1.9975	0.0725592	3	0.07433	w	4	2017-06-13	0.269368
2479	moll	688	India	2	moll_189	Plant_4	24 C	69 % RH	E. i.	male	18	8	0.4149	0.0414358	Left	Forewing	uns	wet	107.436	NA	1.2104	0.104539	3	0.07433	w	4	2017-06-13	0.323325
2481	moll	689	India	2	moll_162	Plant_4	24 C	69 % RH	O. c.	male	26	9	0.3038	0.0258557	Left	Forewing	uns	wet	NA	NA	NA	NA	3	0.07433	w	4	2017-06-05	NA
2483	moll	690	India	2	moll_189	Plant_4	24 C	69 % RH	E. i.	male	18	9	0.3988	0.0408927	Left	Forewing	uns	wet	103.548	NA	1.2059	0.0896983	3	0.07433	w	4	2017-06-13	0.299497
2485	moll	691	India	2	moll_183	Plant_4	24 C	69 % RH	S. b.	female	20	NA	0.4297	0.0377304	Left	Forewing	uns	wet	122.692	NA	2.8912	0.0941941	3	0.07433	w	4	2017-06-11	0.306911
2487	moll	692	India	2	moll_179	Plant_4	24 C	69 % RH	P. s.	female	21	8	0.416	0.0355477	Left	Forewing	uns	wet	123.597	NA	3.1347	0.0805099	3	0.07433	w	4	2017-06-09	0.283743
2489	moll	693	India	2	moll_183	Plant_4	24 C	69 % RH	S. b.	male	19	8	0.3822	0.0381953	Left	Forewing	uns	wet	102.554	NA	1.3007	0.070256	3	0.07433	w	4	2017-06-11	0.265058
2491	moll	694	India	2	moll_153	Plant_4	24 C	69 % RH	P. p.	male	27	9	0.4338	0.0280371	Left	Forewing	uns	wet	115.851	NA	3.2543	0.0533279	3	0.07433	w	3	2017-06-04	0.230928
2493	moll	695	India	2	moll_187	Plant_4	24 C	69 % RH	E. i.	male	20	8	0.4335	0.0378413	Left	Forewing	uns	wet	108.249	NA	0.8778	0.0600905	3	0.07433	w	4	2017-06-13	0.245134
2495	moll	696	India	2	moll_177	Plant_4	24 C	69 % RH	P. p.	male	24	8	0.3924	0.0305046	Left	Forewing	uns	wet	111.865	NA	1.7517	0.0644132	3	0.07433	w	4	2017-06-09	0.253798
2497	moll	697	India	2	moll_177	Plant_4	24 C	69 % RH	P. p.	male	24	7	0.3614	0.0296792	Left	Forewing	uns	int	99.726	NA	1.6582	0.0522852	2	0.04792	w	3	2017-06-09	0.22866
2499	moll	698	India	2	moll_154	Plant_4	24 C	69 % RH	O. c.	male	30	NA	0.2862	0.0219669	Left	Forewing	uns	wet	88.8735	NA	1.5055	0.0645309	3	0.07433	w	4	2017-06-04	0.254029
2501	moll	699	India	2	moll_193	Plant_4	24 C	69 % RH	E. i.	male	19	NA	0.3755	0.0379708	Left	Forewing	uns	wet	97.2878	NA	0.794	0.10159	3	0.07433	w	4	2017-06-15	0.318732
2505	moll	701	India	2	moll_182	Plant_4	24 C	69 % RH	P. s.	female	21	3	NA	NA	Left	Forewing	uns	wet	128.941	NA	2.4497	0.10449	4	0.09885	w	4	2017-06-11	0.323249
2507	moll	703	India	2	moll_194	Plant_4	24 C	69 % RH	S. b.	female	17	8	0.4344	0.04455	Left	Forewing	uns	wet	107.566	NA	1.6219	0.0785064	3	0.07433	w	4	2017-06-15	0.28019
2509	moll	704	India	2	moll_169	Plant_4	24 C	69 % RH	P. p.	male	26	8	0.4597	0.0296837	Left	Forewing	uns	wet	115.749	NA	1.8539	0.0483239	3	0.07433	w	4	2017-06-07	0.219827
2511	moll	705	India	2	moll_193	Plant_4	24 C	69 % RH	E. i.	male	18	NA	0.3941	0.0407314	Left	Forewing	uns	wet	102.257	NA	1.3651	0.0880323	3	0.07433	w	4	2017-06-15	0.296702
2513	moll	706	India	2	moll_194	Plant_4	24 C	69 % RH	S. b.	female	20	5	0.4344	0.0378675	Left	Forewing	uns	wet	130.338	NA	2.347	0.0912391	3	0.07433	w	4	2017-06-15	0.302058
2515	moll	707	India	2	moll_193	Plant_4	24 C	69 % RH	E. i.	female	20	9	0.4516	0.0383608	Left	Forewing	uns	wet	116.802	NA	2.0267	0.108356	4	0.09885	w	4	2017-06-15	0.329175
2517	moll	708	India	2	moll_169	Plant_4	24 C	69 % RH	P. p.	female	28	9	0.3559	0.0253096	Left	Forewing	uns	wet	116.813	NA	3.2374	0.0735385	3	0.07433	w	3	2017-06-07	0.27118
2519	moll	709	India	2	moll_185	Plant_4	24 C	69 % RH	P. s.	female	25	NA	0.4581	0.0308352	Left	Forewing	uns	wet	140.39	NA	3.5738	0.0766156	3	0.07433	w	4	2017-06-11	0.276795
2521	moll	710	India	2	moll_195	Plant_4	24 C	69 % RH	S. b.	male	21	8	0.4101	0.0353789	Left	Forewing	uns	wet	107.595	NA	1.9708	0.0561966	3	0.07433	w	4	2017-06-15	0.237058
2523	moll	712	India	2	moll_195	Plant_4	24 C	69 % RH	S. b.	female	21	8	0.381	0.0345215	Left	Forewing	uns	wet	120.543	NA	3.267	0.094894	3	0.07433	w	4	2017-06-15	0.308049
2525	moll	713	India	2	moll_190	Plant_4	24 C	69 % RH	M. r.	female	26	8	0.3947	0.028213	Left	Forewing	uns	wet	124.634	NA	2.8395	0.0730441	3	0.07433	w	4	2017-06-14	0.270267
2527	moll	715	India	2	moll_188	Plant_4	24 C	69 % RH	O. c.	male	28	8	0.2739	0.0231938	Left	Forewing	uns	wet	82.571	NA	1.9494	0.0944853	3	0.07433	w	4	2017-06-13	0.307385
2529	moll	716	India	2	moll_198	Plant_4	24 C	69 % RH	O. c.	female	17	7	0.2971	0.0392511	Left	Forewing	uns	wet	96.2454	NA	1.7872	0.0842767	3	0.07433	w	4	2017-06-23	0.290305
2531	moll	717	India	2	moll_167	Plant_4	24 C	69 % RH	C. f.	male	34	7	0.3656	0.0210308	Left	Forewing	uns	int	102.725	NA	3.2329	0.037979	2	0.04792	d	3	2017-06-06	0.194882
2533	moll	718	India	2	moll_177	Plant_4	24 C	69 % RH	P. p.	male	31	9	0.3118	0.0218741	Left	Forewing	uns	wet	87.5688	NA	1.4807	0.0725486	3	0.07433	w	4	2017-06-09	0.269348
2535	moll	720	India	2	moll_195	Plant_4	24 C	69 % RH	S. b.	female	26	8	0.414	0.0286655	Left	Forewing	uns	wet	130.692	NA	3.1866	0.0736045	3	0.07433	d	4	2017-06-15	0.271301
2537	moll	721	India	2	moll_182	Plant_4	24 C	69 % RH	P. s.	male	26	7	0.3662	0.0275169	Left	Forewing	uns	wet	108.783	NA	2.2284	0.052021	3	0.07433	w	4	2017-06-11	0.228081
2539	moll	722	India	2	moll_196	Plant_4	24 C	69 % RH	P. p.	female	26	8	0.3539	0.0272053	Left	Forewing	uns	wet	116.255	NA	3.1106	0.0893292	3	0.07433	w	4	2017-06-15	0.29888
2541	moll	724	India	2	moll_186	Plant_4	24 C	69 % RH	O. c.	male	24	NA	0.2778	0.0271873	Left	Forewing	uns	wet	94.6463	NA	1.8262	0.0681328	3	0.07433	w	3	2017-06-13	0.261023
2543	moll	725	India	2	moll_187	Plant_4	24 C	69 % RH	E. i.	female	24	NA	0.4067	0.0308707	Left	Forewing	uns	wet	125.2	NA	2.6703	0.0886776	3	0.07433	w	4	2017-06-13	0.297788
2545	moll	726	India	2	moll_196	Plant_4	24 C	69 % RH	P. p.	female	23	8	0.3448	0.0304879	Left	Forewing	uns	wet	114.859	NA	2.767	0.0770536	3	0.07433	w	4	2017-06-15	0.277585
2547	moll	727	India	2	moll_194	Plant_4	24 C	69 % RH	S. b.	male	24	8	0.3649	0.0297747	Left	Forewing	uns	int	103.088	NA	2.1583	0.0547731	2	0.04792	w	3	2017-06-15	0.234037
2549	moll	728	India	2	moll_195	Plant_4	24 C	69 % RH	S. b.	female	22	NA	0.3899	0.0332069	Left	Forewing	uns	wet	129.755	NA	3.158	0.0852938	3	0.07433	w	4	2017-06-15	0.292051
2551	moll	729	India	2	moll_186	Plant_4	24 C	69 % RH	O. c.	male	24	NA	0.2324	0.0256173	Left	Forewing	uns	dry	82.2695	NA	2.4884	0.0252925	1	0.02026	d	3	2017-06-13	0.159036
2553	moll	730	India	2	moll_167	Plant_4	24 C	69 % RH	C. f.	female	37	7	0.4896	0.0213016	Left	Forewing	uns	int	127.9	NA	3.1383	0.0374701	2	0.04792	d	3	2017-06-06	0.193572
2555	moll	732	India	2	moll_?	Plant_4	24 C	69 % RH	S. b.	male	NA	8	0.356	NA	Left	Forewing	uns	wet	90.5263	NA	0.6955	0.0621195	3	0.07433	w	4	NA	0.249238
2557	moll	733	India	2	moll_198	Plant_4	24 C	69 % RH	O. c.	male	19	7	0.2907	0.0348654	Left	Forewing	uns	wet	87.9652	NA	1.0909	0.0822505	3	0.07433	w	4	2017-06-23	0.286793
2559	moll	735	India	2	moll_203	Plant_4	24 C	69 % RH	E. i.	female	19	8	0.4755	0.0410799	Left	Forewing	uns	wet	119.871	NA	2.4208	0.0851983	3	0.07433	w	4	2017-06-24	0.291887
2561	moll	736	India	2	moll_202	Plant_4	24 C	69 % RH	R. c.	female	19	8	0.5389	0.0428301	Left	Forewing	uns	wet	128.802	NA	2.184	0.0780664	3	0.07433	w	3	2017-06-24	0.279404
2563	moll	737	India	2	moll_202	Plant_4	24 C	69 % RH	R. c.	male	18	6	0.4402	0.0422614	Left	Forewing	uns	wet	101.257	NA	0.2967	0.0921738	3	0.07433	w	4	2017-06-24	0.303601
2565	moll	738	India	2	moll_175	Plant_4	24 C	69 % RH	D. s.	female	33	7	0.3902	0.0221436	Left	Forewing	uns	int	120.365	NA	3.3145	0.0491936	2	0.04792	d	3	2017-06-09	0.221796
2567	moll	739	India	2	moll_198	Plant_4	24 C	69 % RH	O. c.	female	19	7	0.3611	0.0374791	Left	Forewing	uns	wet	111.943	NA	2.0603	0.0951981	4	0.09885	w	4	2017-06-23	0.308542
2569	moll	740	India	2	moll_175	Plant_4	24 C	69 % RH	D. s.	male	34	7	0.2871	0.0194028	Left	Forewing	uns	wet	95.6946	NA	2.1956	0.0652003	3	0.07433	w	4	2017-06-09	0.255344
2571	moll	741	India	2	moll_206	Plant_4	24 C	69 % RH	P. p.	female	19	7	0.4154	0.0392707	Left	Forewing	uns	wet	112.305	NA	2.4764	0.0849826	3	0.07433	w	4	2017-06-25	0.291518
2573	moll	742	India	2	moll_206	Plant_4	24 C	69 % RH	P. p.	male	19	6	0.4129	0.0391918	Left	Forewing	uns	wet	101.966	NA	1.62	0.0639102	3	0.07433	w	3	2017-06-25	0.252805
2575	moll	743	India	2	moll_201	Plant_4	24 C	69 % RH	O. c.	male	22	6	0.3327	0.0314964	Left	Forewing	uns	int	94.3619	NA	2.0521	0.0457648	2	0.04792	w	3	2017-06-23	0.213927
2577	moll	744	India	2	moll_197	Plant_4	24 C	69 % RH	O. c.	female	22	8	0.421	0.0340673	Left	Forewing	uns	wet	129.825	NA	2.4946	0.0756771	3	0.07433	w	4	2017-06-23	0.275095
2579	moll	745	India	2	moll_197	Plant_4	24 C	69 % RH	O. c.	female	21	5	0.3391	0.0332065	Left	Forewing	uns	wet	114.656	NA	3.4238	0.0796052	3	0.07433	d	3	2017-06-23	0.282144
2581	moll	746	India	2	moll_201	Plant_4	24 C	69 % RH	O. c.	female	21	7	0.3933	0.034889	Left	Forewing	uns	int	112.647	NA	3.1941	0.0460861	2	0.04792	d	3	2017-06-23	0.214677
2583	moll	747	India	2	moll_202	Plant_4	24 C	69 % RH	R. c.	female	20	6	0.4966	0.0395949	Left	Forewing	uns	wet	134.382	NA	2.1672	0.106595	3	0.07433	w	4	2017-06-24	0.326489
2585	moll	748	India	2	moll_209	Plant_4	24 C	69 % RH	P. s.	male	19	6	0.3998	0.0387728	Left	Forewing	uns	wet	99.9654	NA	0.4028	0.0798379	3	0.07433	w	4	2017-06-25	0.282556
2587	moll	749	India	2	moll_?	Plant_4	24 C	69 % RH	S. b.	female	NA	7	0.4341	NA	Left	Forewing	uns	wet	119.31	NA	2.8805	0.0832479	3	0.07433	w	4	NA	0.288527
2589	moll	750	India	2	moll_190	Plant_4	24 C	69 % RH	M. r.	female	30	NA	0.4267	0.0250949	Left	Forewing	uns	wet	136.529	NA	2.6541	0.076094	3	0.07433	w	3	2017-06-14	0.275851
2591	moll	751	India	2	moll_175	Plant_4	24 C	69 % RH	D. s.	female	35	7	0.2706	0.0184803	Left	Forewing	uns	int	88.8162	NA	2.6009	0.073685	3	0.07433	d	3	2017-06-09	0.27145
2593	moll	752	India	2	moll_175	Plant_4	24 C	69 % RH	D. s.	female	36	6	0.3131	0.0188622	Left	Forewing	uns	wet	103.317	NA	2.777	0.0720773	3	0.07433	w	3	2017-06-09	0.268472
2595	moll	753	India	2	moll_214	Plant_4	24 C	69 % RH	E. i.	female	20	8	0.4407	0.0380497	Left	Forewing	uns	wet	129.194	NA	2.8731	0.074949	3	0.07433	w	4	2017-06-28	0.273768
2597	moll	754	India	2	moll_216	Plant_4	24 C	69 % RH	S. b.	male	20	7	0.3724	0.0359727	Left	Forewing	uns	wet	102.15	NA	0.9651	0.0648479	3	0.07433	w	3	2017-06-28	0.254653
2599	moll	755	India	2	moll_208	Plant_4	24 C	69 % RH	Z. m. y	female	23	8	0.3697	0.0312048	Left	Forewing	uns	wet	117.646	NA	2.0166	0.100843	4	0.09885	w	4	2017-06-25	0.317558
2601	moll	756	India	2	moll_217	Plant_4	24 C	69 % RH	E. i.	female	20	8	0.4403	0.0380382	Left	Forewing	uns	wet	129.297	NA	2.5956	0.0778112	3	0.07433	w	4	2017-06-28	0.278947
2603	moll	757	India	2	moll_214	Plant_4	24 C	69 % RH	E. i.	male	20	7	0.389	0.0364995	Left	Forewing	uns	wet	111.951	NA	1.5585	0.0682385	3	0.07433	w	4	2017-06-28	0.261225
2605	moll	758	India	2	moll_212	Plant_4	24 C	69 % RH	A. c.	female	21	8	0.4209	0.0356868	Left	Forewing	uns	wet	130.542	NA	2.0525	0.0729285	3	0.07433	w	3	2017-06-28	0.270053
2607	moll	759	India	2	moll_218	Plant_4	24 C	69 % RH	E. i.	female	20	7	0.453	0.0384004	Left	Forewing	uns	wet	117.668	NA	1.375	0.0938119	3	0.07433	w	4	2017-06-28	0.306287
2609	moll	761	India	2	moll_208	Plant_4	24 C	69 % RH	Z. m. y	female	21	8	0.4202	0.035667	Left	Forewing	uns	wet	134.321	NA	1.6216	0.0841121	3	0.07433	w	3	2017-06-25	0.290021
2611	moll	763	India	2	moll_208	Plant_4	24 C	69 % RH	Z. m. y	female	21	9	0.3986	0.035045	Left	Forewing	uns	wet	NA	NA	2.7112	NA	3	0.07433	w	4	2017-06-25	NA
2613	moll	764	India	2	moll_192	Plant_4	24 C	69 % RH	O. unid.	female	35	8	0.3366	0.0198748	Left	Forewing	uns	wet	114.213	NA	3.5988	0.0438242	3	0.07433	w	4	2017-06-14	0.209342
2615	moll	766	India	2	moll_175	Plant_4	24 C	69 % RH	D. s.	female	38	8	0.3614	0.0187447	Left	Forewing	uns	int	110	NA	3.0439	0.051313	2	0.04792	d	3	2017-06-09	0.226524
2617	moll	767	India	2	moll_201	Plant_4	24 C	69 % RH	O. c.	female	24	8	0.3538	0.0294696	Left	Forewing	uns	wet	104.606	NA	2.1022	0.0702657	3	0.07433	w	3	2017-06-23	0.265077
2619	moll	768	India	2	moll_205	Plant_4	24 C	69 % RH	M. r.	female	21	7	0.3693	0.0341644	Left	Forewing	uns	wet	113.793	NA	1.7757	0.081494	3	0.07433	w	4	2017-06-25	0.285471
2621	moll	769	India	2	moll_199	Plant_4	24 C	69 % RH	P. p.	female	23	7	0.4027	0.032107	Left	Forewing	uns	wet	123.478	NA	1.7984	0.075709	3	0.07433	w	4	2017-06-23	0.275153
2623	moll	770	India	2	moll_201	Plant_4	24 C	69 % RH	O. c.	female	23	8	0.3367	0.0302473	Left	Forewing	uns	wet	105.085	NA	1.9261	0.0865644	3	0.07433	w	4	2017-06-23	0.294218
2625	moll	772	India	2	moll_216	Plant_4	24 C	69 % RH	S. b.	female	21	7	0.3676	0.0341119	Left	Forewing	uns	wet	118.25	NA	2.4153	0.0739961	3	0.07433	w	4	2017-06-28	0.272022
2627	moll	773	India	2	moll_216	Plant_4	24 C	69 % RH	S. b.	female	22	7	0.4079	0.0337102	Left	Forewing	uns	wet	124.725	NA	3.0012	0.0722865	3	0.07433	w	4	2017-06-28	0.268862
2629	moll	774	India	2	moll_214	Plant_4	24 C	69 % RH	E. i.	female	21	8	0.4291	0.035917	Left	Forewing	uns	wet	139.311	NA	2.57	0.0653561	3	0.07433	w	4	2017-06-28	0.255648
2631	moll	775	India	2	moll_209	Plant_4	24 C	69 % RH	P. s.	female	24	8	0.4705	0.0324072	Left	Forewing	uns	int	116.571	NA	2.4165	0.0432688	2	0.04792	w	3	2017-06-25	0.208012
2633	moll	776	India	2	moll_216	Plant_4	24 C	69 % RH	S. b.	female	21	8	0.4231	0.0357488	Left	Forewing	uns	wet	131.781	NA	2.9435	0.0556475	3	0.07433	w	4	2017-06-28	0.235897
2635	moll	777	India	2	moll_214	Plant_4	24 C	69 % RH	E. i.	female	21	8	0.4646	0.0368814	Left	Forewing	uns	wet	143.528	NA	3.3606	0.0791603	3	0.07433	w	4	2017-06-28	0.281354
2637	moll	778	India	2	moll_217	Plant_4	24 C	69 % RH	E. i.	female	22	NA	0.4645	0.0352024	Left	Forewing	uns	wet	125.004	NA	2.2586	0.0888949	3	0.07433	w	4	2017-06-28	0.298152
2639	moll	779	India	2	moll_175	Plant_4	24 C	69 % RH	D. s.	female	40	8	0.3576	0.0177449	Left	Forewing	uns	wet	111.057	NA	2.4114	0.0596061	3	0.07433	w	3	2017-06-09	0.244144
2641	moll	780	India	2	moll_214	Plant_4	24 C	69 % RH	E. i.	female	21	7	0.4254	0.0358135	Left	Forewing	uns	wet	123.423	NA	1.9253	0.0845314	3	0.07433	w	4	2017-06-28	0.290743
2643	moll	781	India	2	moll_204	Plant_4	24 C	69 % RH	O. t.	male	26	NA	0.3175	0.0262386	Left	Forewing	uns	dry	99.812	NA	2.8907	0.0338077	1	0.02026	d	2	2017-06-24	0.183869
2645	moll	782	India	2	moll_214	Plant_4	24 C	69 % RH	E. i.	female	21	8	0.43	0.0359421	Left	Forewing	uns	wet	135.176	NA	3.1403	0.0586354	3	0.07433	w	4	2017-06-28	0.242147
2647	moll	783	India	2	moll_223	Plant_4	24 C	69 % RH	R. c.	male	18	8	0.4293	0.0419097	Left	Forewing	uns	wet	115.659	NA	0.5411	0.119	4	0.09885	w	4	2017-07-01	0.344964
2649	moll	785	India	2	moll_224	Plant_4	24 C	69 % RH	M. r.	male	19	NA	0.31678	0.0358783	Left	Forewing	uns	wet	92.0112	NA	1.3354	0.0732693	3	0.07433	w	3	2017-07-01	0.270683
2651	moll	786	India	2	moll_225	Plant_4	24 C	69 % RH	S. b.	male	19	NA	0.3785	0.0380716	Left	Forewing	uns	int	98.7579	NA	1.8941	0.0421507	2	0.04792	w	3	2017-07-01	0.205306
2653	moll	787	India	2	moll_200	Plant_4	24 C	69 % RH	P. s.	male	27	NA	0.3786	0.0267935	Left	Forewing	uns	wet	102.336	NA	1.6074	0.0600151	3	0.07433	w	3	2017-06-23	0.24498
2655	moll	788	India	2	moll_223	Plant_4	24 C	69 % RH	R. c.	male	20	NA	0.4046	0.036981	Left	Forewing	uns	wet	106.014	NA	1.0267	0.0841852	3	0.07433	w	4	2017-07-01	0.290147
2657	moll	789	India	2	moll_225	Plant_4	24 C	69 % RH	S. b.	male	20	NA	0.3352	0.0347327	Left	Forewing	uns	wet	91.556	NA	1.3048	0.0583481	3	0.07433	w	4	2017-07-01	0.241554
2661	moll	790	India	2	moll_214	Plant_4	24 C	69 % RH	E. i.	female	24	8	0.4638	0.0322527	Left	Forewing	uns	wet	139.523	NA	3.0863	0.0661616	3	0.07433	w	3	2017-06-28	0.257219
2663	moll	791	India	2	moll_219	Plant_4	24 C	69 % RH	O. c.	female	24	NA	0.3787	0.0301454	Left	Forewing	uns	wet	122.077	NA	2.7211	0.092396	4	0.09885	w	4	2017-06-28	0.303967
2665	moll	792	India	2	moll_217	Plant_4	24 C	69 % RH	E. i.	male	23	NA	0.4433	0.0331516	Left	Forewing	uns	wet	112.273	NA	NA	0.0748447	4	0.09885	w	3	2017-06-28	0.273578
2667	moll	793	India	2	moll_200	Plant_4	24 C	69 % RH	P. s.	male	28	NA	0.4234	0.026818	Left	Forewing	uns	wet	104.222	NA	1.2108	0.0599292	3	0.07433	w	3	2017-06-23	0.244804
2669	moll	794	India	2	moll_205	Plant_4	24 C	69 % RH	M. r.	male	26	NA	0.3626	0.0274264	Left	Forewing	uns	wet	95.6828	NA	1.1435	0.0661998	3	0.07433	w	4	2017-06-25	0.257293
2671	moll	795	India	2	moll_212	Plant_4	24 C	69 % RH	A. c.	female	23	NA	0.3837	0.0315939	Left	Forewing	uns	wet	116.972	NA	1.9636	0.0931996	4	0.09885	w	4	2017-06-28	0.305286
2673	moll	796	India	2	moll_225	Plant_4	24 C	69 % RH	S. b.	female	20	NA	0.3652	0.0357394	Left	Forewing	uns	wet	109.686	NA	1.9145	0.0678731	3	0.07433	w	4	2017-07-01	0.260525
2675	moll	797	India	2	moll_230	Plant_4	24 C	69 % RH	R. c.	female	18	NA	0.384	0.0403805	Left	Forewing	uns	wet	110.793	NA	1.1307	0.0512147	3	0.07433	w	4	2017-07-03	0.226307
2677	moll	798	India	2	moll_216	Plant_4	24 C	69 % RH	S. b.	female	23	NA	0.4109	0.0323234	Left	Forewing	uns	wet	126.859	NA	2.3645	0.0768045	3	0.07433	w	4	2017-06-28	0.277136
2679	moll	799	India	2	moll_230	Plant_4	24 C	69 % RH	R. c.	male	18	NA	0.4852	0.043655	Left	Forewing	uns	wet	116.36	NA	1.2168	0.0678434	3	0.07433	w	4	2017-07-03	0.260468
2685	moll	800	India	2	moll_217	Plant_4	24 C	69 % RH	E. i.	female	23	NA	0.46	0.0335628	Left	Forewing	uns	wet	123.467	NA	1.9903	0.0912813	4	0.09885	w	4	2017-06-28	0.302128
2687	moll	801	India	2	moll_217	Plant_4	24 C	69 % RH	E. i.	female	23	NA	0.4717	0.033845	Left	Forewing	uns	wet	120.346	NA	2.0684	0.0868757	3	0.07433	w	4	2017-06-28	0.294747
2689	moll	802	India	2	moll_213	Plant_4	24 C	69 % RH	P. p.	female	24	8	0.3186	0.028458	Left	Forewing	uns	wet	106.4	NA	1.6921	0.0629289	3	0.07433	w	4	2017-06-28	0.250856
2691	moll	803	India	2	moll_213	Plant_4	24 C	69 % RH	P. p.	female	24	9	0.3791	0.030156	Left	Forewing	uns	wet	118.101	NA	2.5846	0.045332	3	0.07433	w	4	2017-06-28	0.212913
2693	moll	804	India	2	moll_215	Plant_4	24 C	69 % RH	P. p.	female	25	9	0.5045	0.031843	Left	Forewing	uns	wet	136.286	NA	3.1572	0.0744076	3	0.07433	d	4	2017-06-28	0.272778
2695	moll	805	India	2	moll_216	Plant_4	24 C	69 % RH	S. b.	male	24	NA	0.4323	0.0315053	Left	Forewing	uns	wet	119.103	NA	1.8954	0.0659068	3	0.07433	w	4	2017-06-28	0.256723
2697	moll	807	India	2	moll_215	Plant_4	24 C	69 % RH	P. p.	male	25	NA	0.4471	0.0305864	Left	Forewing	uns	wet	121.199	NA	2.4511	0.0630406	3	0.07433	w	3	2017-06-28	0.251079
2699	moll	808	India	2	moll_217	Plant_4	24 C	69 % RH	E. i.	male	24	8	0.4451	0.0318132	Left	Forewing	uns	int	108.218	NA	1.179	0.0425384	2	0.04792	w	3	2017-06-28	0.206248
2701	moll	809	India	2	moll_231	Plant_4	24 C	69 % RH	R. c.	male	16	8	0.4226	0.0469018	Left	Forewing	uns	wet	102.76	NA	0.888	0.1252	4	0.09885	w	4	2017-07-06	0.353837
2705	moll	810	India	2	moll_207	Plant_4	24 C	69 % RH	O. c.	male	28	8	0.3443	0.0250315	Left	Forewing	uns	int	105.916	NA	2.1603	0.041751	2	0.04792	w	3	2017-06-25	0.204331
2707	moll	811	India	2	moll_230	Plant_4	24 C	69 % RH	R. c.	female	20	NA	0.4323	0.0378064	Left	Forewing	uns	wet	126.66	NA	2.5791	0.083002	3	0.07433	w	4	2017-07-03	0.288101
2709	moll	812	India	2	moll_233	Plant_4	24 C	69 % RH	E. i.	male	18	8	0.4944	0.0439292	Left	Forewing	uns	wet	81.8991	NA	NA	0.0831584	3	0.07433	w	4	2017-07-06	0.288372
2711	moll	813	India	2	moll_215	Plant_4	24 C	69 % RH	P. p.	female	26	8	0.5014	0.0305554	Left	Forewing	uns	int	139.053	NA	3.4445	0.052996	2	0.04792	d	3	2017-06-28	0.230209
2713	moll	814	India	2	moll_229	Plant_4	24 C	69 % RH	A. c.	male	22	8	0.3064	0.0306436	Left	Forewing	uns	wet	93.1888	NA	1.2165	0.069944	3	0.07433	w	4	2017-07-03	0.264469
2715	moll	815	India	2	moll_222	Plant_4	24 C	69 % RH	O. c.	male	26	NA	0.2145	0.0230234	Left	Forewing	uns	int	NA	NA	NA	NA	2	0.04792	3	3	2017-06-29	NA
2717	moll	816	India	2	moll_233	Plant_4	24 C	69 % RH	E. i.	female	19	6	0.423	0.0395087	Left	Forewing	uns	wet	121.599	NA	1.5338	0.0847292	3	0.07433	w	4	2017-07-06	0.291083
2719	moll	817	India	2	moll_233	Plant_4	24 C	69 % RH	E. i.	male	19	8	0.3808	0.0381486	Left	Forewing	uns	wet	98.8763	NA	0.7962	0.114603	4	0.09885	w	4	2017-07-06	0.338531
2721	moll	818	India	2	moll_231	Plant_4	24 C	69 % RH	R. c.	male	18	7	0.4182	0.0415453	Left	Forewing	uns	wet	109.548	NA	0.9033	0.107472	4	0.09885	w	4	2017-07-06	0.32783
2723	moll	819	India	2	moll_207	Plant_4	24 C	69 % RH	O. c.	female	30	8	0.4041	0.0246438	Left	Forewing	uns	wet	113.241	NA	2.7489	0.0640847	3	0.07433	w	4	2017-06-25	0.25315
2727	moll	820	India	2	moll_231	Plant_4	24 C	69 % RH	R. c.	male	18	7	0.4511	0.0426074	Left	Forewing	uns	wet	105.881	NA	0.5056	0.076335	3	0.07433	w	4	2017-07-06	0.276288
2729	moll	821	India	2	moll_212	Plant_4	24 C	69 % RH	A. c.	female	26	8	0.4285	0.0289964	Left	Forewing	uns	wet	120.297	NA	2.6644	0.0630321	3	0.07433	w	4	2017-06-28	0.251062
2731	moll	822	India	2	moll_222	Plant_4	24 C	69 % RH	O. c.	female	26	8	0.4312	0.0290571	Left	Forewing	uns	wet	128.963	NA	2.2709	0.0931101	4	0.09885	w	4	2017-06-29	0.305139
2733	moll	823	India	2	moll_215	Plant_4	24 C	69 % RH	P. p.	male	28	8	0.419	0.0267247	Left	Forewing	uns	wet	118.425	NA	2.3321	0.0501249	3	0.07433	w	3	2017-06-28	0.223886
2735	moll	824	India	2	moll_204	Plant_4	24 C	69 % RH	O. t.	female	32	5	0.3327	0.0216538	Left	Forewing	uns	wet	105.945	NA	2.4224	0.0589659	3	0.07433	w	3	2017-06-24	0.242829
2737	moll	825	India	2	moll_229	Plant_4	24 C	69 % RH	A. c.	male	23	8	0.3488	0.0306054	Left	Forewing	uns	int	104.79	NA	1.8721	0.0444514	2	0.04792	w	3	2017-07-03	0.210835
2739	moll	826	India	2	moll_228	Plant_4	24 C	69 % RH	R. c.	male	23	7	0.2688	0.0280596	Left	Forewing	uns	wet	85.8423	NA	1.8151	0.0668122	3	0.07433	w	3	2017-07-03	0.25848
2741	moll	827	India	2	moll_233	Plant_4	24 C	69 % RH	E. i.	male	20	7	0.3663	0.0357752	Left	Forewing	uns	wet	98.571	NA	1.1594	0.0773622	3	0.07433	w	4	2017-07-06	0.278141
2743	moll	828	India	2	moll_222	Plant_4	24 C	69 % RH	O. c.	male	28	8	0.4342	0.0270441	Left	Forewing	uns	wet	115.442	NA	1.4757	0.0784552	3	0.07433	w	4	2017-06-29	0.280099
2745	moll	829	India	2	moll_211	Plant_4	24 C	69 % RH	P. p.	female	30	8	0.4314	0.0251868	Left	Forewing	uns	wet	125.815	NA	2.8047	0.0988441	4	0.09885	w	4	2017-06-26	0.314395
2749	moll	830	India	2	moll_204	Plant_4	24 C	69 % RH	O. t.	female	35	7	0.4115	0.0212515	Left	Forewing	uns	wet	100.249	NA	3.5435	0.086018	3	0.07433	d	4	2017-06-24	0.293288
2751	moll	831	India	2	moll_232	Plant_4	24 C	69 % RH	R. c.	female	23	7	0.4249	0.0326864	Left	Forewing	uns	wet	120.589	NA	1.4422	0.0968825	3	0.07433	w	4	2017-07-06	0.31126
2753	moll	832	India	2	moll_232	Plant_4	24 C	69 % RH	R. c.	male	23	8	0.4177	0.0325008	Left	Forewing	uns	wet	115.59	NA	1.3781	0.0853642	3	0.07433	w	4	2017-07-06	0.292172
2755	moll	834	India	2	moll_240	Plant_4	24 C	69 % RH	E. unid	female	24	10	0.2952	0.0277435	Left	Forewing	uns	wet	104.35	NA	2.9359	0.0735671	3	0.07433	w	4	2017-07-19	0.271233
2757	moll	837	India	2	moll_244	Plant_4	24 C	69 % RH	M. r.	male	22	8	0.379	0.0328945	Left	Forewing	uns	wet	101.292	NA	0.6362	0.0757523	3	0.07433	w	4	2017-07-21	0.275231
2759	moll	838	India	2	moll_243	Plant_4	24 C	69 % RH	M. r.	male	22	8	0.4067	0.0336772	Left	Forewing	uns	wet	115.096	NA	0.6318	0.081416	3	0.07433	w	4	2017-07-21	0.285335
2761	moll	839	India	2	moll_238	Plant_4	24 C	69 % RH	S. b.	male	24	9	0.378	0.0301268	Left	Forewing	uns	wet	NA	NA	NA	0.0693917	3	0.07433	w	4	2017-07-19	0.263423
2763	moll	840	India	2	moll_239	Plant_4	24 C	69 % RH	P. p.	male	21	8	0.4237	0.0357657	Left	Forewing	uns	wet	110.654	NA	0.5539	0.0878545	4	0.09885	w	4	2017-07-19	0.296403
2765	moll	841	India	2	moll_243	Plant_4	24 C	69 % RH	M. r.	male	22	7	0.3821	0.032984	Left	Forewing	uns	wet	107.929	NA	0.4048	0.0927686	4	0.09885	w	4	2017-07-21	0.304579
2767	moll	844	India	2	moll_244	Plant_4	24 C	69 % RH	M. r.	male	22	8	0.365	0.0324844	Left	Forewing	uns	wet	103.931	NA	0.8075	0.0736323	3	0.07433	w	4	2017-07-21	0.271353
2769	moll	845	India	2	moll_242	Plant_4	24 C	69 % RH	B. mu.	female	27	7	0.3312	0.0256251	Left	Forewing	uns	wet	105.474	NA	3.2952	0.0950458	3	0.07433	d	4	2017-07-19	0.308295
2771	moll	846	India	2	moll_241	Plant_4	24 C	69 % RH	B. mu.	female	26	8	0.3663	0.0275194	Left	Forewing	uns	wet	122.895	NA	4.5004	0.0672636	3	0.07433	d	3	2017-07-19	0.259352
2773	moll	847	India	2	moll_235	Plant_4	24 C	69 % RH	E. unid	male	27	9	0.3618	0.0263912	Left	Forewing	uns	wet	106.321	NA	0.7558	0.0763812	3	0.07433	w	4	2017-07-19	0.276371
2775	moll	848	India	2	moll_242	Plant_4	24 C	69 % RH	B. mu.	male	26	9	0.2442	0.0240404	Left	Forewing	uns	wet	78.5717	NA	1.4852	0.0672448	3	0.07433	w	3	2017-07-19	0.259316
2777	moll	849	India	2	moll_239	Plant_4	24 C	69 % RH	P. p.	female	26	8	0.3714	0.0276465	Left	Forewing	uns	wet	112.269	NA	3.7295	0.0758989	3	0.07433	w	4	2017-07-19	0.275498
2781	moll	850	India	2	moll_239	Plant_4	24 C	69 % RH	P. p.	female	26	6	0.4172	0.0287392	Left	Forewing	uns	wet	119.365	NA	3.4318	0.0606301	3	0.07433	d	3	2017-07-19	0.246232
2783	moll	851	India	2	moll_239	Plant_4	24 C	69 % RH	P. p.	female	26	8	0.3896	0.0280909	Left	Forewing	uns	wet	103.316	NA	NA	0.0735397	3	0.07433	w	3	2017-07-19	0.271182
2785	moll	852	India	2	moll_239	Plant_4	24 C	69 % RH	P. p.	female	27	9	0.3355	0.0257356	Left	Forewing	uns	int	114.148	NA	3.5669	0.0503985	2	0.04792	d	3	2017-07-19	0.224496
2787	moll	853	India	2	moll_234	Plant_4	24 C	69 % RH	E. unid	male	26	8	0.3454	0.0269857	Left	Forewing	uns	wet	104.275	NA	0.8991	0.0972063	3	0.07433	w	3	2017-07-19	0.311779
2789	moll	854	India	2	moll_234	Plant_4	24 C	69 % RH	E. unid	female	28	8	0.3942	0.0261867	Left	Forewing	uns	wet	123.443	NA	1.98	0.0988975	4	0.09885	w	4	2017-07-19	0.31448
2791	moll	855	India	2	moll_244	Plant_4	24 C	69 % RH	M. r.	male	27	8	0.3956	0.0271887	Left	Forewing	uns	wet	111.199	NA	1.3967	0.0550806	3	0.07433	w	4	2017-07-21	0.234693
2793	moll	857	India	2	moll_237	Plant_4	24 C	69 % RH	E. unid	female	28	9	0.2838	0.02347	Left	Forewing	uns	wet	95.1648	NA	2.1528	0.108372	3	0.07433	w	4	2017-07-19	0.329199
2795	moll	858	India	2	moll_240	Plant_4	24 C	69 % RH	E. unid	male	28	8	0.2867	0.0235497	Left	Forewing	uns	dry	93.4332	NA	2.648	0.0306952	1	0.02026	d	2	2017-07-19	0.175201
2799	moll	860	India	2	moll_237	Plant_4	24 C	69 % RH	E. unid	female	29	NA	0.3127	0.0234051	Left	Forewing	uns	wet	NA	NA	2.9189	NA	3	0.07433	w	4	2017-07-19	NA
2801	moll	861	India	2	moll_237	Plant_4	24 C	69 % RH	E. unid	male	31	9	0.3899	0.0235662	Left	Forewing	uns	int	114.041	NA	2.9706	0.0420043	2	0.04792	w	3	2017-07-19	0.204949
2803	moll	862	India	2	moll_237	Plant_4	24 C	69 % RH	E. unid	female	30	9	0.3357	0.0231666	Left	Forewing	uns	wet	102.974	NA	2.6189	0.0884234	3	0.07433	d	3	2017-07-19	0.297361
2805	moll	863	India	2	moll_236	Plant_4	24 C	69 % RH	E. unid	female	30	NA	0.3317	0.0230742	Left	Forewing	uns	wet	106.019	NA	2.8606	0.080851	3	0.07433	w	4	2017-07-19	0.284343
2807	moll	864	India	2	moll_234	Plant_4	24 C	69 % RH	E. unid	male	31	9	0.3779	0.0233219	Left	Forewing	uns	wet	105.989	NA	1.1335	0.081025	3	0.07433	w	4	2017-07-19	0.284649
2809	moll	865	India	2	moll_235	Plant_4	24 C	69 % RH	E. unid	female	31	8	0.2569	0.0205066	Left	Forewing	uns	wet	89.8196	NA	2.0192	0.0846713	3	0.07433	w	4	2017-07-19	0.290983
2811	moll	866	India	2	moll_237	Plant_4	24 C	69 % RH	E. unid	female	31	9	0.3556	0.0228538	Left	Forewing	uns	dry	NA	NA	2.2688	NA	1	0.02026	d	2	2017-07-19	NA
2813	moll	867	India	2	moll_235	Plant_4	24 C	69 % RH	E. unid	female	30	9	0.3328	0.0230997	Left	Forewing	uns	wet	113.25	NA	2.5746	0.0951437	4	0.09885	w	4	2017-07-19	0.308454
2815	moll	869	India	2	moll_247	Plant_4	24 C	69 % RH	C. f.	female	25	8	0.2475	0.0251141	Left	Forewing	uns	int	87.279	NA	2.5942	0.0627072	2	0.04792	d	3	2017-07-29	0.250414
2819	moll	870	India	2	moll_243.1	Plant_4	24 C	69 % RH	C. h..	male	24	9	0.2737	0.0270529	Left	Forewing	uns	wet	83.8169	NA	1.6865	0.066713	3	0.07433	w	4	2017-07-29	0.258289
2821	moll	871	India	2	moll_247	Plant_4	24 C	69 % RH	C. f.	female	26	8	0.358	0.02731	Left	Forewing	uns	int	114.43	NA	3.6218	0.0642256	2	0.04792	d	3	2017-07-29	0.253428
2823	moll	872	India	2	moll_247	Plant_4	24 C	69 % RH	C. f.	male	26	8	0.3063	0.0259264	Left	Forewing	uns	int	101.187	NA	3.3998	0.0355219	2	0.04792	d	3	2017-07-29	0.188473
2825	moll	873	India	2	moll_247	Plant_4	24 C	69 % RH	C. f.	male	26	8	0.2469	0.0241287	Left	Forewing	uns	int	82.306	NA	1.9529	0.0449387	2	0.04792	d	3	2017-07-29	0.211987
2827	moll	874	India	2	moll_247	Plant_4	24 C	69 % RH	C. f.	male	25	9	0.2649	0.0256894	Left	Forewing	uns	int	89.9871	NA	1.7165	0.0581058	2	0.04792	d	3	2017-07-29	0.241051
2829	moll	875	India	2	moll_247	Plant_4	24 C	69 % RH	C. f.	male	29	9	0.3043	0.0231937	Left	Forewing	uns	int	96.9866	NA	2.2572	NA	2	0.04792	d	3	2017-07-29	NA
2831	moll	876	India	2	moll_247	Plant_4	24 C	69 % RH	C. f.	male	29	7	0.3265	0.0237445	Left	Forewing	uns	int	111.232	NA	3.7844	0.0624313	3	0.07433	d	2	2017-07-29	0.249863
2833	moll	877	India	2	moll_247	Plant_4	24 C	69 % RH	C. f.	male	29	8	0.346	0.0242081	Left	Forewing	uns	wet	113.186	NA	2.611	0.0765955	3	0.07433	d	2	2017-07-29	0.276759
2835	moll	878	India	2	moll_243.1	Plant_4	24 C	69 % RH	C. h..	female	32	7	0.3513	0.02205	Left	Forewing	uns	int	110.124	NA	3.5712	0.0482515	2	0.04792	w	4	2017-07-29	0.219662
2837	moll	879	India	2	moll_247	Plant_4	24 C	69 % RH	C. f.	male	31	8	0.3088	0.0218037	Left	Forewing	uns	int	102.085	NA	2.9866	0.0532791	2	0.04792	d	3	2017-07-29	0.230823
2841	moll	880	India	2	moll_243.1	Plant_4	24 C	69 % RH	C. h..	male	31	8	0.3231	0.0221352	Left	Forewing	uns	int	103.079	NA	3.1908	0.0340265	2	0.04792	d	2	2017-07-29	0.184463
2843	moll	881	India	2	moll_247	Plant_4	24 C	69 % RH	C. f.	male	34	8	0.3921	0.0215272	Left	Forewing	uns	int	108.224	NA	2.7369	0.0502224	2	0.04792	d	3	2017-07-29	0.224104
2845	moll	882	India	2	moll_247	Plant_4	24 C	69 % RH	C. f.	female	37	NA	0.3766	0.0195175	Left	Forewing	uns	wet	NA	NA	NA	0.061258	3	0.07433	w	3	2017-07-29	0.247504
2847	moll	883	India	2	moll_245	Plant_4	24 C	69 % RH	C. h..	female	37	NA	0.1721	0.0150334	Left	Forewing	uns	wet	117.391	NA	2.1879	0.0682407	3	0.07433	w	4	2017-07-29	0.261229
2849	moll	884	India	2	moll_251	Plant_4	24 C	69 % RH	M. r.	female	21	7	0.4144	0.0355021	Left	Forewing	uns	wet	125.614	NA	1.6379	0.110931	3	0.07433	w	3	2017-09-02	0.333064
2851	moll	885	India	2	moll_251	Plant_4	24 C	69 % RH	M. r.	male	21	7	0.4239	0.0357713	Left	Forewing	uns	wet	107.363	NA	0.8403	0.0927301	3	0.07433	w	4	2017-09-02	0.304516
2853	moll	886	India	2	moll_251	Plant_4	24 C	69 % RH	M. r.	female	20	7	0.3757	0.0360787	Left	Forewing	uns	wet	110.477	NA	1.7822	0.0964083	3	0.07433	w	4	2017-09-02	0.310497
2855	moll	887	India	2	moll_251	Plant_4	24 C	69 % RH	M. r.	male	21	7	0.4064	0.0352722	Left	Forewing	uns	wet	102.289	NA	0.8878	0.0777463	3	0.07433	w	4	2017-09-02	0.27883
2857	moll	888	India	2	moll_251	Plant_4	24 C	69 % RH	M. r.	female	20	8	0.3738	0.0360177	Left	Forewing	uns	wet	NA	NA	NA	0.111014	3	0.07433	w	4	2017-09-02	0.333188
2859	moll	889	India	2	moll_251	Plant_4	24 C	69 % RH	M. r.	male	21	7	0.3582	0.0338186	Left	Forewing	uns	wet	99.1842	NA	0.9773	0.0859554	3	0.07433	w	4	2017-09-02	0.293181
2863	moll	890	India	2	moll_251	Plant_4	24 C	69 % RH	M. r.	male	21	7	0.4046	0.03522	Left	Forewing	uns	wet	96.3649	NA	0.9147	0.0827514	3	0.07433	w	4	2017-09-02	0.287665
2865	moll	891	India	2	moll_252	Plant_4	24 C	69 % RH	E. unid	male	24	8	0.222	0.0252294	Left	Forewing	uns	int	75.0781	NA	1.029	0.0677043	2	0.04792	w	4	2017-09-02	0.260201
2867	moll	892	India	2	moll_252	Plant_4	24 C	69 % RH	E. unid	female	23	7	0.2626	0.0278422	Left	Forewing	uns	wet	91.0477	NA	1.4945	0.0785216	3	0.07433	w	4	2017-09-02	0.280217
2869	moll	893	India	2	moll_251	Plant_4	24 C	69 % RH	M. r.	male	24	9	0.4039	0.0307997	Left	Forewing	uns	wet	120.926	NA	2.1779	0.0746177	3	0.07433	w	4	2017-09-02	0.273162
2871	moll	894	India	2	moll_251	Plant_4	24 C	69 % RH	M. r.	female	23	7	0.3655	0.0310862	Left	Forewing	uns	wet	121.195	NA	2.4679	0.0772514	3	0.07433	w	3	2017-09-02	0.277941
2873	moll	895	India	2	moll_252	Plant_4	24 C	69 % RH	E. unid	male	25	8	0.3026	0.0268545	Left	Forewing	uns	wet	92.9214	NA	1.8724	0.0674635	3	0.07433	w	4	2017-09-02	0.259737
2875	moll	896	India	2	moll_251	Plant_4	24 C	69 % RH	M. r.	female	25	8	0.4539	0.0307407	Left	Forewing	uns	wet	122.681	NA	1.8629	0.0909515	3	0.07433	w	4	2017-09-02	0.301582
2877	moll	897	India	2	moll_252	Plant_4	24 C	69 % RH	E. unid	male	25	8	0.2163	0.0240111	Left	Forewing	uns	int	72.6118	NA	1.5914	0.048057	2	0.04792	w	3	2017-09-02	0.219219
2879	moll	898	India	2	moll_252	Plant_4	24 C	69 % RH	E. unid	male	25	8	0.2469	0.0250938	Left	Forewing	uns	int	80.5961	NA	1.7507	0.0418455	2	0.04792	w	3	2017-09-02	0.204562
2881	moll	899	India	2	moll_251	Plant_4	24 C	69 % RH	M. r.	female	25	8	0.3898	0.0292196	Left	Forewing	uns	wet	116.002	NA	2.355	0.0805997	3	0.07433	w	4	2017-09-02	0.283901
2885	moll	900	India	2	moll_251	Plant_4	24 C	69 % RH	M. r.	male	28	8	0.4531	0.0274309	Left	Forewing	uns	wet	107.331	NA	1.0397	0.071203	3	0.07433	w	4	2017-09-02	0.266839
609	moore	25-05-01	Ghana	2	moore_5.1	Temp_1	25 C	75 % RH	Z. m. y	male	22	12	0.4153	0.0339129	Left	Forewing	ups	wet	94.9823	0.3672	1.037	0.0183308	NA	NA	NA	NA	100	0.135391
454	moore	25-05-02	Ghana	2	moore_5.1	Temp_1	25 C	75 % RH	Z. m. y	female	22	11	0.4671	0.035268	Right	Forewing	uns	wet	135.194	0.8142	2.957	0.0249378	NA	NA	NA	NA	100	0.157917
597	moore	25-05-03	Ghana	2	moore_5.1	Temp_1	25 C	75 % RH	Z. m. y	female	22	11	0.4375	0.0345067	Left	Forewing	ups	wet	128.269	0.75145	2.6196	0.0145523	NA	NA	NA	NA	100	0.120633
675	moore	25-05-05	Ghana	2	moore_5.1	Temp_1	25 C	75 % RH	Z. m. y	female	23	10	0.5538	0.0357045	Left	Forewing	ups	dry	157.03	1.2791	4.40175	0.00644927	NA	NA	NA	NA	100	0.0803073
960	moore	25-05-06	Ghana	2	moore_5.1	Temp_1	25 C	75 % RH	Z. m. y	male	23	10	0.5225	0.0350188	Right	Forewing	uns	dry	138.412	0.73055	2.3511	0.00225961	NA	NA	NA	NA	100	0.0475353
692	moore	25-05-07	Ghana	2	moore_5.1	Temp_1	25 C	75 % RH	Z. m. y	female	24	10	0.5397	0.0339239	Left	Forewing	ups	dry	155.209	1.2465	4.50925	0.0060591	NA	NA	NA	NA	100	0.0778402
3	moore	25-05-08	Ghana	2	moore_5.1	Temp_1	25 C	75 % RH	Z. m. y	male	24	10	0.5594	0.0343318	Right	Forewing	uns	dry	150.109	0.8139	2.7206	0.00135153	NA	NA	NA	NA	100	0.0367631
735	moore	25-05-09	Ghana	2	moore_5.1	Temp_1	25 C	75 % RH	Z. m. y	NA	24	9	0.4146	0.0310693	Right	Forewing	uns	dry	123.403	0.7562	3.1504	0.0058258	NA	NA	NA	NA	100	0.0763269
957	moore	25-05-10	Ghana	2	moore_5.1	Temp_1	25 C	75 % RH	Z. m. y	male	24	10	0.5753	0.034654	Right	Forewing	uns	dry	148.053	0.9843	3.30235	0.00225976	NA	NA	NA	NA	100	0.047537
625	moore	25-05-11	Ghana	2	moore_5.1	Temp_1	25 C	75 % RH	Z. m. y	female	NA	NA	NA	NA	Left	Forewing	ups	dry	143.562	1.01595	3.75245	0.00821399	NA	NA	NA	NA	100	0.0906311
832	moore	25-05-12	Ghana	2	moore_5.1	Temp_1	25 C	75 % RH	Z. m. y	male	26	9	0.4998	0.0305229	Left	Forewing	ups	dry	136.753	0.7368	2.40175	0.00458202	NA	NA	NA	NA	100	0.0676906
784	moore	25-05-13	Ghana	2	moore_5.1	Temp_1	25 C	75 % RH	Z. m. y	female	27	10	0.4691	0.0287778	Left	Forewing	ups	dry	146.901	1.1786	4.5678	0.00483629	NA	NA	NA	NA	100	0.0695434
627	moore	25-05-14	Ghana	2	moore_5.1	Temp_1	25 C	75 % RH	Z. m. y	female	28	9	0.4079	0.0264866	Right	Forewing	uns	int	129.371	0.9504	3.1396	0.00964771	NA	NA	NA	NA	100	0.0982228
978	moore	25-06-01	Ghana	3	moore_6.2	Temp_2	25 C	75 % RH	Z. m. y	female	21	9	0.5634	0.0393296	Left	Forewing	ups	dry	161.737	1.3292	4.985	0.00334376	NA	NA	NA	NA	154	0.0578253
708	moore	25-06-01a	Ghana	2	moore_6.1	Temp_1	25 C	75 % RH	Z. m. y	female	22	10	0.5523	0.0372937	Left	Forewing	ups	dry	160.591	1.29375	4.5936	0.00494159	NA	NA	NA	NA	101	0.0702964
66	moore	25-06-02	Ghana	3	moore_6.2	Temp_2	25 C	75 % RH	Z. m. y	male	22	10	0.5257	0.0366851	Right	Forewing	uns	dry	145.439	0.77085	2.4884	0.00464722	NA	NA	NA	NA	154	0.0681706
691	moore	25-06-02a	Ghana	2	moore_6.1	Temp_1	25 C	75 % RH	Z. m. y	male	23	10	0.5065	0.0346576	Left	Forewing	ups	dry	125.671	0.7101	2.66025	0.00639643	NA	NA	NA	NA	101	0.0799777
779	moore	25-06-03	Ghana	2	moore_6.1	Temp_1	25 C	75 % RH	Z. m. y	male	23	9	0.4429	0.0331416	Right	Forewing	uns	dry	111.903	0.7149	2.4935	0.00633634	NA	NA	NA	NA	101	0.0796011
67	moore	25-06-03a	Ghana	3	moore_6.2	Temp_2	25 C	75 % RH	Z. m. y	female	22	8	0.5588	0.0374394	Right	Forewing	uns	dry	170.09	1.5027	5.4363	0.00391558	NA	NA	NA	NA	154	0.0625746
115	moore	25-06-04	Ghana	3	moore_6.2	Temp_2	25 C	75 % RH	Z. m. y	female	22	8	0.5398	0.0370102	Left	Forewing	ups	dry	157.635	1.21475	5.32365	0.00441484	NA	NA	NA	NA	154	0.0664442
694	moore	25-06-04a	Ghana	2	moore_6.1	Temp_1	25 C	75 % RH	Z. m. y	NA	24	9	0.4658	0.032299	Left	Forewing	ups	dry	135.438	0.9237	3.16145	0.00717062	NA	NA	NA	NA	101	0.0846795
1014	moore	25-06-05	Ghana	3	moore_6.2	Temp_2	25 C	75 % RH	Z. m. y	male	22	8	0.5099	0.0363139	Right	Forewing	uns	dry	132.89	0.67275	2.89415	0.0079832	NA	NA	NA	NA	154	0.0893488
688	moore	25-06-05a	Ghana	2	moore_6.1	Temp_1	25 C	75 % RH	Z. m. y	male	24	10	0.5331	0.0337851	Left	Forewing	ups	dry	145.565	0.93035	3.23095	0.00650868	NA	NA	NA	NA	101	0.0806764
60	moore	25-06-06	Ghana	3	moore_6.2	Temp_2	25 C	75 % RH	Z. m. y	male	24	9	0.5272	0.03366	Right	Forewing	uns	dry	140.216	1.06915	4.0966	0.0086966	NA	NA	NA	NA	154	0.0932555
207	moore	25-06-06a	Ghana	2	moore_6.1	Temp_1	25 C	75 % RH	Z. m. y	female	26	7	0.546	0.0314358	Right	Forewing	uns	wet	135.281	0.7337	2.7092	0.0367602	NA	NA	NA	NA	101	0.19173
1040	moore	25-06-07	Ghana	3	moore_6.2	Temp_2	25 C	75 % RH	Z. m. y	male	24	10	0.5586	0.0343154	Left	Forewing	ups	dry	163.33	1.2393	4.784	0.00460697	NA	NA	NA	NA	154	0.0678746
753	moore	25-06-07a	Ghana	2	moore_6.1	Temp_1	25 C	75 % RH	Z. m. y	male	NA	NA	NA	NA	Left	Forewing	ups	dry	150.198	1.0349	3.33975	0.00553073	NA	NA	NA	NA	101	0.0743689
105	moore	25-06-08	Ghana	3	moore_6.2	Temp_2	25 C	75 % RH	Z. m. y	male	24	10	0.5954	0.035053	Left	Forewing	ups	dry	160.171	0.89225	3.4034	0.00528534	NA	NA	NA	NA	154	0.0727004
808	moore	25-06-08a	Ghana	2	moore_6.1	Temp_1	25 C	75 % RH	Z. m. y	male	25	9	0.4625	0.0309336	Right	Forewing	uns	dry	134.208	0.67775	1.91005	0.0046622	NA	NA	NA	NA	101	0.0682803
6	moore	25-06-09	Ghana	3	moore_6.2	Temp_2	25 C	75 % RH	Z. m. y	male	25	10	0.612	0.0339607	Left	Forewing	ups	dry	159.833	1.2045	4.6551	NA	NA	NA	NA	NA	154	NA
741	moore	25-06-09a	Ghana	2	moore_6.1	Temp_1	25 C	75 % RH	Z. m. y	female	26	9	0.4181	0.0287599	Right	Forewing	uns	dry	128.052	0.9972	3.34035	0.00622867	NA	NA	NA	NA	101	0.0789219
698	moore	25-06-10	Ghana	2	moore_6.1	Temp_1	25 C	75 % RH	Z. m. y	female	26	9	0.535	0.0312232	Right	Forewing	uns	dry	164.998	1.3816	4.5124	0.00567336	NA	NA	NA	NA	101	0.0753217
22	moore	25-06-11	Ghana	3	moore_6.2	Temp_2	25 C	75 % RH	Z. m. y	male	25	10	0.5252	0.0322727	Left	Forewing	ups	dry	153.107	1.188	4.74195	0.00289777	NA	NA	NA	NA	154	0.053831
620	moore	25-06-11a	Ghana	2	moore_6.1	Temp_1	25 C	75 % RH	Z. m. y	female	NA	NA	0.4781	NA	Left	Forewing	ups	int	138.014	1.0338	3.6719	0.00925151	NA	NA	NA	NA	101	0.0961848
101	moore	25-06-12	Ghana	3	moore_6.2	Temp_2	25 C	75 % RH	Z. m. y	female	25	9	0.2959	0.0266548	Right	Forewing	uns	dry	92.5958	0.61685	2.4095	0.0115691	NA	NA	NA	NA	154	0.10756
75	moore	25-06-13	Ghana	3	moore_6.2	Temp_2	25 C	75 % RH	Z. m. y	male	29	10	0.6174	0.0293624	Left	Forewing	ups	dry	166.648	1.1056	4.1557	0.00479315	NA	NA	NA	NA	154	0.0692325
220	moore	25-06-13a	Ghana	2	moore_6.1	Temp_1	25 C	75 % RH	Z. m. y	male	NA	NA	NA	NA	Left	Forewing	ups	wet	97.1008	0.62145	2.3535	0.0498595	NA	NA	NA	NA	101	0.223292
1035	moore	25-07-01	Ghana	3	moore_7.2	Temp_2	25 C	75 % RH	Z. m. y	male	22	10	0.5161	0.0364604	Right	Forewing	uns	dry	157.056	1.0416	4.01285	0.00574116	NA	NA	NA	NA	154	0.0757705
990	moore	25-07-02	Ghana	3	moore_7.2	Temp_2	25 C	75 % RH	Z. m. y	male	22	10	0.46	0.0350884	Left	Forewing	ups	dry	137.191	1.14045	3.8976	0.0110257	NA	NA	NA	NA	154	0.105004
109	moore	25-07-03	Ghana	3	moore_7.2	Temp_2	25 C	75 % RH	Z. m. y	male	23	10	0.5334	0.0352606	Right	Forewing	uns	dry	144.452	0.72885	2.71165	0.0100042	NA	NA	NA	NA	154	0.100021
111	moore	25-07-04	Ghana	3	moore_7.2	Temp_2	25 C	75 % RH	Z. m. y	female	23	10	0.5623	0.0358863	Left	Forewing	ups	dry	166.4	1.2497	5.1474	0.00868149	NA	NA	NA	NA	154	0.0931745
1001	moore	25-07-05	Ghana	3	moore_7.2	Temp_2	25 C	75 % RH	Z. m. y	female	24	10	0.5615	0.0343747	Left	Forewing	ups	dry	171.608	1.2156	5.1061	0.0070164	NA	NA	NA	NA	154	0.0837639
1005	moore	25-07-06	Ghana	3	moore_7.2	Temp_2	25 C	75 % RH	Z. m. y	female	24	9	0.4786	0.0325921	Right	Forewing	uns	dry	144.55	0.97435	3.53995	0.00906392	NA	NA	NA	NA	154	0.0952046
1015	moore	25-07-07	Ghana	3	moore_7.2	Temp_2	25 C	75 % RH	Z. m. y	female	25	9	0.5358	0.0324883	Right	Forewing	uns	dry	166.69	1.29205	5.3315	0.00825945	NA	NA	NA	NA	154	0.0908815
23	moore	25-07-08	Ghana	3	moore_7.2	Temp_2	25 C	75 % RH	Z. m. y	male	25	10	0.5882	0.0335147	Left	Forewing	ups	dry	167.397	0.93315	3.7784	0.00634029	NA	NA	NA	NA	154	0.0796259
79	moore	25-07-09	Ghana	3	moore_7.2	Temp_2	25 C	75 % RH	Z. m. y	male	26	10	0.4181	0.0287599	Left	Forewing	ups	dry	127.85	0.8395	3.21485	0.00600056	NA	NA	NA	NA	154	0.0774633
69	moore	25-08-01	Ghana	3	moore_8.2	Temp_2	25 C	75 % RH	Z. m. y	female	22	8	0.6322	0.0390118	Right	Forewing	uns	dry	186.144	1.25625	4.9831	0.00497172	NA	NA	NA	NA	154	0.0705104
61	moore	25-08-02	Ghana	3	moore_8.2	Temp_2	25 C	75 % RH	Z. m. y	female	23	9	0.4977	0.0344557	Right	Forewing	uns	dry	154.109	1.0109	4.57045	0.00879098	NA	NA	NA	NA	154	0.0937602
62	moore	25-08-03	Ghana	3	moore_8.2	Temp_2	25 C	75 % RH	Z. m. y	female	23	10	0.5952	0.0365729	Left	Forewing	ups	dry	173.281	1.515	5.96165	0.00609639	NA	NA	NA	NA	154	0.0780793
107	moore	25-08-04	Ghana	3	moore_8.2	Temp_2	25 C	75 % RH	Z. m. y	female	24	9	0.5017	0.0331083	Right	Forewing	uns	dry	162.357	1.1636	5.2477	0.00625708	NA	NA	NA	NA	154	0.0791017
29	moore	25-08-05	Ghana	3	moore_8.2	Temp_2	25 C	75 % RH	Z. m. y	female	24	10	0.5582	0.0343072	Left	Forewing	ups	dry	168.965	1.481	5.66855	0.00584432	NA	NA	NA	NA	154	0.0764481
24	moore	25-08-07	Ghana	3	moore_8.2	Temp_2	25 C	75 % RH	Z. m. y	female	25	10	0.6238	0.0341776	Right	Forewing	uns	dry	182.928	1.3297	5.9707	0.0055871	NA	NA	NA	NA	154	0.0747469
25	moore	25-08-08	Ghana	3	moore_8.2	Temp_2	25 C	75 % RH	Z. m. y	female	25	9	0.5574	0.0329192	Right	Forewing	uns	dry	156.461	1.5451	5.8633	0.0069445	NA	NA	NA	NA	154	0.0833336
26	moore	25-08-09	Ghana	3	moore_8.2	Temp_2	25 C	75 % RH	Z. m. y	male	25	10	0.6078	0.0338829	Left	Forewing	ups	dry	174.667	1.41395	5.78295	0.00447853	NA	NA	NA	NA	154	0.0669219
15	moore	25-08-10	Ghana	3	moore_8.2	Temp_2	25 C	75 % RH	Z. m. y	female	27	10	0.509	0.0295716	Right	Forewing	uns	dry	145.959	1.45375	5.5833	0.00478426	NA	NA	NA	NA	154	0.0691683
1008	moore	25-09-01	Ghana	3	moore_9.2	Temp_2	25 C	75 % RH	Z. m. y	female	22	10	0.5106	0.0363305	Left	Forewing	ups	dry	162.142	1.47195	5.8762	0.00760777	NA	NA	NA	NA	154	0.0872225
1022	moore	25-09-02	Ghana	3	moore_9.2	Temp_2	25 C	75 % RH	Z. m. y	female	22	10	0.5973	0.0382803	Left	Forewing	ups	dry	159.573	1.4555	5.64185	0.00862112	NA	NA	NA	NA	154	0.09285
37	moore	25-09-03	Ghana	3	moore_9.2	Temp_2	25 C	75 % RH	Z. m. y	male	23	10	0.5756	0.036167	Right	Forewing	uns	dry	158.985	0.98275	3.28805	0.00591692	NA	NA	NA	NA	154	0.0769215
31	moore	25-09-04	Ghana	3	moore_9.2	Temp_2	25 C	75 % RH	Z. m. y	male	24	10	0.4446	0.0318013	Left	Forewing	ups	dry	136.476	0.6121	2.3573	0.0074746	NA	NA	NA	NA	154	0.0864558
32	moore	25-09-05	Ghana	3	moore_9.2	Temp_2	25 C	75 % RH	Z. m. y	male	24	10	0.4482	0.0318869	Left	Forewing	ups	dry	139.538	0.83485	3.0409	0.00981691	NA	NA	NA	NA	154	0.0990803
27	moore	25-09-07	Ghana	3	moore_9.2	Temp_2	25 C	75 % RH	Z. m. y	male	25	9	0.4862	0.0314532	Right	Forewing	uns	dry	137.141	0.88015	3.15165	0.00784432	NA	NA	NA	NA	154	0.0885681
983	moore	25-09-08	Ghana	3	moore_9.2	Temp_2	25 C	75 % RH	Z. m. y	female	25	10	0.4984	0.0317141	Right	Forewing	uns	dry	156.482	0.8666	3.81625	0.00523067	NA	NA	NA	NA	154	0.0723234
1018	moore	25-10-01	Ghana	3	Temp_10.2	Temp_2	25 C	75 % RH	Z. m. y	female	23	10	0.5638	0.0359181	Right	Forewing	uns	dry	174.867	1.30025	5.0889	0.00703345	NA	NA	NA	NA	155	0.0838656
34	moore	25-10-02	Ghana	3	Temp_10.2	Temp_2	25 C	75 % RH	Z. m. y	male	24	10	0.5368	0.0338631	Left	Forewing	ups	dry	156.888	0.7529	3.06575	0.00443467	NA	NA	NA	NA	155	0.0665933
562	moore	25-13-01	Ghana	2	Temp_13.1	Temp_1	25 C	75 % RH	Z. m. y	female	22	9	0.5792	0.0378896	Right	Forewing	uns	int	154.434	0.95265	3.65215	0.0155587	NA	NA	NA	NA	104	0.124734
884	moore	25-13-02	Ghana	2	Temp_13.1	Temp_1	25 C	75 % RH	Z. m. y	male	22	9	0.5793	0.0378918	Right	Forewing	uns	dry	147.957	0.9118	3.0687	0.00275269	NA	NA	NA	NA	104	0.0524661
661	moore	25-13-03	Ghana	2	Temp_13.1	Temp_1	25 C	75 % RH	Z. m. y	male	23	10	0.5109	0.0347577	Left	Forewing	ups	dry	130.377	0.93995	3.4237	0.00879642	NA	NA	NA	NA	104	0.0937892
617	moore	25-13-04	Ghana	2	Temp_13.1	Temp_1	25 C	75 % RH	Z. m. y	female	23	8	0.5656	0.0359563	Right	Forewing	uns	int	138.374	0.9016	3.24455	0.00905097	NA	NA	NA	NA	104	0.0951366
720	moore	25-13-05	Ghana	2	Temp_13.1	Temp_1	25 C	75 % RH	Z. m. y	female	23	9	0.5657	0.0359584	Right	Forewing	uns	dry	149.808	1.49735	5.5589	0.00734903	NA	NA	NA	NA	104	0.0857265
734	moore	25-13-07	Ghana	2	Temp_13.1	Temp_1	25 C	75 % RH	Z. m. y	male	NA	NA	0.5931	NA	Left	Forewing	ups	dry	158.492	0.7715	2.42985	0.00460766	NA	NA	NA	NA	104	0.0678798
613	moore	25-13-08	Ghana	2	Temp_13.1	Temp_1	25 C	75 % RH	Z. m. y	female	NA	NA	0.5745	NA	Left	Forewing	ups	int	152.787	1.20155	3.9684	0.00951451	NA	NA	NA	NA	104	0.0975423
819	moore	25-13-09	Ghana	2	Temp_13.1	Temp_1	25 C	75 % RH	Z. m. y	male	NA	NA	0.5236	NA	Right	Forewing	uns	dry	139.312	1.10145	3.78195	0.0044851	NA	NA	NA	NA	104	0.0669709
700	moore	25-13-11	Ghana	2	Temp_13.1	Temp_1	25 C	75 % RH	Z. m. y	male	NA	NA	0.4936	NA	Left	Forewing	ups	dry	116.475	0.77105	2.77755	0.00730739	NA	NA	NA	NA	104	0.0854833
746	moore	25-13-11(2)	Ghana	2	Temp_13.1	Temp_1	25 C	75 % RH	Z. m. y	male	NA	NA	NA	NA	Right	Forewing	uns	dry	128.525	0.7535	2.74815	0.00491909	NA	NA	NA	NA	104	0.0701363
915	moore	25-14-02	Ghana	2	Temp_14.1	Temp_1	25 C	75 % RH	Z. m. y	male	25	10	0.5085	0.0319269	Left	Forewing	ups	dry	145.219	0.8678	2.76945	0.00318767	NA	NA	NA	NA	103	0.0564595
714	moore	25-14-03	Ghana	2	Temp_14.1	Temp_1	25 C	75 % RH	Z. m. y	male	25	10	0.5184	0.0321328	Left	Forewing	ups	dry	138.668	0.9122	3.47565	0.00659981	NA	NA	NA	NA	103	0.0812392
652	moore	25-14-04	Ghana	2	Temp_14.1	Temp_1	25 C	75 % RH	Z. m. y	male	26	10	0.4829	0.0301749	Right	Forewing	uns	dry	125.625	1.0512	3.50005	0.00798476	NA	NA	NA	NA	103	0.0893575
682	moore	25-14-05	Ghana	2	Temp_14.1	Temp_1	25 C	75 % RH	Z. m. y	male	26	10	0.3953	0.0282273	Left	Forewing	ups	dry	110.083	0.94175	3.14725	0.00890711	NA	NA	NA	NA	103	0.0943775
909	moore	25-14-08	Ghana	2	Temp_14.1	Temp_1	25 C	75 % RH	Z. m. y	male	28	10	0.4061	0.0264476	Left	Forewing	ups	dry	112.222	1.10935	3.96215	0.0040588	NA	NA	NA	NA	103	0.0637087
731	moore	25-14-09	Ghana	2	Temp_14.1	Temp_1	25 C	75 % RH	Z. m. y	male	NA	NA	NA	NA	Left	Forewing	ups	dry	117.273	0.82195	2.82175	0.00662936	NA	NA	NA	NA	103	0.0814209
726	moore	25-14-10	Ghana	2	Temp_14.1	Temp_1	25 C	75 % RH	Z. m. y	female	NA	NA	NA	NA	Right	Forewing	uns	dry	127.304	0.86225	3.39765	0.00535942	NA	NA	NA	NA	103	0.0732081
641	moore	25-14-11	Ghana	2	Temp_14.1	Temp_1	25 C	75 % RH	Z. m. y	NA	30	9	0.3943	0.024443	Left	Forewing	ups	dry	132.019	0.98265	3.45755	0.00773215	NA	NA	NA	NA	103	0.0879327
831	moore	25-14-13	Ghana	2	Temp_14.1	Temp_1	25 C	75 % RH	Z. m. y	female	31	10	0.4867	0.0253742	Left	Forewing	ups	dry	145.846	1.18625	4.5786	0.00359279	NA	NA	NA	NA	103	0.0599399
601	moore	25-14-14	Ghana	2	Temp_14.1	Temp_1	25 C	75 % RH	Z. m. y	male	37	9	0.417	0.0201919	Left	Forewing	ups	int	111.806	0.73075	2.7749	0.0142741	NA	NA	NA	NA	103	0.119474
642	moore	25-15-01	Ghana	2	Temp_15.1	Temp_1	25 C	75 % RH	Z. m. y	female	21	9	0.5678	0.0394317	Right	Forewing	uns	int	151.569	1.088	4.2405	0.00473604	NA	NA	NA	NA	103	0.0688189
145	moore	25-15-02	Ghana	2	Temp_15.1	Temp_1	25 C	75 % RH	Z. m. y	female	22	8	0.4466	0.0347443	Right	Forewing	uns	wet	121.314	0.56765	2.0464	0.0481239	NA	NA	NA	NA	103	0.219372
572	moore	25-15-03	Ghana	2	Temp_15.1	Temp_1	25 C	75 % RH	Z. m. y	female	22	9	0.4831	0.0356662	Right	Forewing	uns	int	131.383	0.8126	2.86885	0.0162041	NA	NA	NA	NA	103	0.127295
875	moore	25-15-04	Ghana	2	Temp_15.1	Temp_1	25 C	75 % RH	Z. m. y	female	24	9	0.5662	0.0344703	Left	Forewing	ups	dry	162.274	1.20565	4.58455	0.00390242	NA	NA	NA	NA	103	0.0624694
456	moore	25-15-05	Ghana	2	Temp_15.1	Temp_1	25 C	75 % RH	Z. m. y	male	24	7	0.4814	0.0326556	Right	Forewing	uns	wet	128.431	0.53595	1.6207	0.0253139	NA	NA	NA	NA	103	0.159103
723	moore	25-15-06	Ghana	2	Temp_15.1	Temp_1	25 C	75 % RH	Z. m. y	male	23	9	0.5262	0.0351012	Right	Forewing	uns	dry	142.126	1.04435	3.5005	0.00564955	NA	NA	NA	NA	103	0.0751635
785	moore	25-15-07	Ghana	2	Temp_15.1	Temp_1	25 C	75 % RH	Z. m. y	male	24	9	0.5104	0.0332986	Left	Forewing	ups	dry	136.689	0.9457	2.95915	0.00503664	NA	NA	NA	NA	103	0.0709693
733	moore	25-15-08.5	Ghana	2	Temp_15.1	Temp_1	25 C	75 % RH	Z. m. y	female	23	9	0.5105	0.0347486	Left	Forewing	ups	dry	157.088	1.39475	5.55315	0.0046839	NA	NA	NA	NA	103	0.068439
769	moore	25-15-09	Ghana	2	Temp_15.1	Temp_1	25 C	75 % RH	Z. m. y	female	NA	NA	NA	NA	Right	Forewing	uns	dry	160.903	1.31995	4.70415	0.00420174	NA	NA	NA	NA	103	0.0648208
744	moore	25-15-10	Ghana	2	Temp_15.1	Temp_1	25 C	75 % RH	Z. m. y	female	24	10	0.5812	0.0347721	Right	Forewing	uns	dry	163.142	1.26235	4.731	0.00431493	NA	NA	NA	NA	103	0.0656881
820	moore	25-15-11	Ghana	2	Temp_15.1	Temp_1	25 C	75 % RH	Z. m. y	male	24	10	0.6443	0.0359875	Right	Forewing	uns	dry	149.542	1.15005	3.87275	0.00440862	NA	NA	NA	NA	103	0.0663974
925	moore	25-15-12	Ghana	2	Temp_15.1	Temp_1	25 C	75 % RH	Z. m. y	male	24	10	0.5224	0.0335575	Left	Forewing	ups	dry	134.202	0.8164	2.8536	0.00360305	NA	NA	NA	NA	103	0.0600254
690	moore	25-15-13	Ghana	2	Temp_15.1	Temp_1	25 C	75 % RH	Z. m. y	female	NA	NA	0.5426	NA	Left	Forewing	ups	dry	158.266	1.38835	4.9869	0.00602971	NA	NA	NA	NA	103	0.0776512
659	moore	25-15-14	Ghana	2	Temp_15.1	Temp_1	25 C	75 % RH	Z. m. y	male	27	8	0.5038	0.0294706	Right	Forewing	uns	dry	134.956	0.9053	3.44025	0.00692977	NA	NA	NA	NA	103	0.0832452
151	moore	25-24-01	Ghana	2	Temp_24.1	Temp_1	25 C	75 % RH	Z. m. y	female	22	8	0.3701	0.032635	Left	Forewing	ups	wet	119.518	0.097486	0.9669	0.0460769	NA	NA	NA	NA	105	0.214655
639	moore	25-24-02	Ghana	2	Temp_24.1	Temp_1	25 C	75 % RH	Z. m. y	male	NA	NA	0.4455	NA	Left	Forewing	ups	dry	124.91	0.5712	2.0226	0.00883696	NA	NA	NA	NA	105	0.0940051
663	moore	25-24-03	Ghana	2	Temp_24.1	Temp_1	25 C	75 % RH	Z. m. y	male	24	10	0.5554	0.0342497	Left	Forewing	ups	dry	152.478	0.687	2.2009	0.00664252	NA	NA	NA	NA	105	0.0815016
686	moore	25-24-05	Ghana	2	Temp_24.1	Temp_1	25 C	75 % RH	Z. m. y	male	24	10	0.3894	0.0304266	Left	Forewing	ups	dry	113.601	0.90365	2.8777	0.00667079	NA	NA	NA	NA	105	0.0816749
717	moore	25-24-06	Ghana	2	Temp_24.1	Temp_1	25 C	75 % RH	Z. m. y	male	24	10	0.4404	0.0317009	Left	Forewing	ups	dry	110.467	0.7739	3.0122	0.00726082	NA	NA	NA	NA	105	0.0852104
727	moore	25-24-07	Ghana	2	Temp_24.1	Temp_1	25 C	75 % RH	Z. m. y	female	NA	NA	NA	NA	Right	Forewing	uns	dry	131.521	1.098	3.8864	0.00680477	NA	NA	NA	NA	105	0.082491
796	moore	25-24-08	Ghana	2	Temp_24.1	Temp_1	25 C	75 % RH	Z. m. y	male	NA	NA	NA	NA	Left	Forewing	ups	dry	142.715	0.8782	3.2454	0.00427456	NA	NA	NA	NA	105	0.0653801
635	moore	25-24-09	Ghana	2	Temp_24.1	Temp_1	25 C	75 % RH	Z. m. y	female	28	9	0.4122	0.0265794	Right	Forewing	uns	int	134.767	0.7621	2.92405	0.00793611	NA	NA	NA	NA	105	0.0890849
863	moore	25-24-10	Ghana	2	Temp_24.1	Temp_1	25 C	75 % RH	Z. m. y	male	28	10	0.3986	0.0262838	Left	Forewing	ups	dry	118.576	1.0178	3.4948	0.00366735	NA	NA	NA	NA	105	0.0605586
707	moore	25-24-11	Ghana	2	Temp_24.1	Temp_1	25 C	75 % RH	Z. m. y	male	28	10	0.3623	0.0254604	Left	Forewing	ups	dry	112.379	0.76195	2.85615	0.00792608	NA	NA	NA	NA	105	0.0890285
764	moore	25-24-13	Ghana	2	Temp_24.1	Temp_1	25 C	75 % RH	Z. m. y	female	30	10	0.3798	0.0241396	Right	Forewing	uns	int	121.758	0.89405	3.35775	0.0053914	NA	NA	NA	NA	105	0.0734261
580	moore	25-24-14	Ghana	2	Temp_24.1	Temp_1	25 C	75 % RH	Z. m. y	female	30	10	0.357	0.0236466	Left	Forewing	ups	int	112.966	1.00025	4.0575	0.0139516	NA	NA	NA	NA	105	0.118117
912	moore	25-24-15	Ghana	2	Temp_24.1	Temp_1	25 C	75 % RH	Z. m. y	female	32	10	0.348	0.0219808	Left	Forewing	ups	dry	106.966	0.95945	3.7667	0.00475592	NA	NA	NA	NA	105	0.0689632
515	moore	25-24-16	Ghana	2	Temp_24.1	Temp_1	25 C	75 % RH	Z. m. y	female	33	9	0.4676	0.0235204	Left	Forewing	ups	wet	152.161	1.06365	3.80815	0.0174073	NA	NA	NA	NA	105	0.131937
736	moore	25-24-17	Ghana	2	Temp_24.1	Temp_1	25 C	75 % RH	Z. m. y	male	34	9	0.5758	0.0244687	Left	Forewing	ups	dry	152.369	1.19635	4.986	0.00593778	NA	NA	NA	NA	105	0.077057
657	moore	25-28-01	Ghana	2	Temp_28.1	Temp_1	25 C	75 % RH	Z. m. y	female	NA	NA	NA	NA	Left	Forewing	ups	dry	171.463	1.38875	5.16515	0.00612368	NA	NA	NA	NA	107	0.078254
745	moore	25-28-04	Ghana	2	Temp_28.1	Temp_1	25 C	75 % RH	Z. m. y	female	21	10	0.4054	0.0352432	Left	Forewing	ups	dry	132.39	0.91425	3.0136	0.00566572	NA	NA	NA	NA	107	0.075271
772	moore	25-28-05	Ghana	2	Temp_28.1	Temp_1	25 C	75 % RH	Z. m. y	male	NA	NA	NA	NA	Right	Forewing	uns	dry	122.888	0.93365	3.10615	0.00502421	NA	NA	NA	NA	107	0.0708817
683	moore	25-28-06	Ghana	2	Temp_28.1	Temp_1	25 C	75 % RH	Z. m. y	male	NA	NA	NA	NA	Left	Forewing	ups	dry	148.644	0.9036	3.48725	0.00506993	NA	NA	NA	NA	107	0.0712034
685	moore	25-28-07	Ghana	2	Temp_28.1	Temp_1	25 C	75 % RH	Z. m. y	male	NA	NA	NA	NA	Right	Forewing	uns	dry	134.559	0.76275	2.7052	0.0059592	NA	NA	NA	NA	107	0.0771959
824	moore	25-28-08	Ghana	2	Temp_28.1	Temp_1	25 C	75 % RH	Z. m. y	male	NA	NA	NA	NA	Left	Forewing	ups	dry	143.706	0.9622	3.5164	0.00382359	NA	NA	NA	NA	107	0.0618352
623	moore	25-28-09	Ghana	2	Temp_28.1	Temp_1	25 C	75 % RH	Z. m. y	male	NA	NA	NA	NA	Right	Forewing	uns	dry	123.95	0.9608	3.65945	0.0110779	NA	NA	NA	NA	107	0.105251
622	moore	25-28-10	Ghana	2	Temp_28.1	Temp_1	25 C	75 % RH	Z. m. y	female	NA	NA	NA	NA	Right	Forewing	uns	int	163.348	1.19005	4.669	0.00822714	NA	NA	NA	NA	107	0.0907036
187	moore	25-28-11	Ghana	2	Temp_28.1	Temp_1	25 C	75 % RH	Z. m. y	female	26	8	0.3985	0.0283032	Right	Forewing	uns	wet	125.376	0.6393	2.2752	0.0390585	NA	NA	NA	NA	107	0.197632
838	moore	25-28-12	Ghana	2	Temp_28.1	Temp_1	25 C	75 % RH	Z. m. y	male	26	10	0.5605	0.0317116	Left	Forewing	ups	dry	144.876	0.90405	2.79035	0.00334527	NA	NA	NA	NA	107	0.0578383
739	moore	25-28-14	Ghana	2	Temp_28.1	Temp_1	25 C	75 % RH	Z. m. y	female	34	10	0.5003	0.0233488	Left	Forewing	ups	dry	146.513	1.49895	5.4287	0.00548888	NA	NA	NA	NA	107	0.074087
738	moore	25-28-15	Ghana	2	Temp_28.1	Temp_1	25 C	75 % RH	Z. m. y	female	34	10	0.4396	0.0223635	Right	Forewing	uns	dry	137.698	1.15565	4.76095	0.0057479	NA	NA	NA	NA	107	0.0758149
621	moore	25-37-01	Ghana	2	moore_37.1	Temp_1	25 C	75 % RH	Z. m. y	male	24	10	0.4609	0.0321853	Left	Forewing	ups	dry	131.747	0.6172	1.8659	0.00891474	NA	NA	NA	NA	109	0.0944179
829	moore	25-37-03	Ghana	2	moore_37.1	Temp_1	25 C	75 % RH	Z. m. y	male	25	10	0.5214	0.0321946	Right	Forewing	uns	dry	140.058	0.7525	2.4263	0.0036386	NA	NA	NA	NA	109	0.0603208
626	moore	25-37-04	Ghana	2	moore_37.1	Temp_1	25 C	75 % RH	Z. m. y	female	25	9	0.4858	0.0314446	Left	Forewing	ups	dry	140.493	0.93215	3.47485	0.00771297	NA	NA	NA	NA	109	0.0878235
684	moore	25-37-05	Ghana	2	moore_37.1	Temp_1	25 C	75 % RH	Z. m. y	NA	NA	NA	NA	NA	Right	Forewing	uns	dry	141.247	1.02485	3.9936	0.00609459	NA	NA	NA	NA	109	0.0780678
879	moore	25-37-06	Ghana	2	moore_37.1	Temp_1	25 C	75 % RH	Z. m. y	female	27	9	0.5007	0.02941	Right	Forewing	uns	dry	157.758	1.1496	4.48295	0.00333603	NA	NA	NA	NA	109	0.0577584
715	moore	25-37-07	Ghana	2	moore_37.1	Temp_1	25 C	75 % RH	Z. m. y	male	27	10	0.4782	0.0289627	Left	Forewing	ups	dry	129.808	0.73485	2.533	0.00534268	NA	NA	NA	NA	109	0.0730936
646	moore	25-37-08	Ghana	2	moore_37.1	Temp_1	25 C	75 % RH	Z. m. y	male	27	10	0.4821	0.0290412	Right	Forewing	uns	dry	123.089	0.8121	2.8271	0.00859544	NA	NA	NA	NA	109	0.0927116
528	moore	25-37-09	Ghana	2	moore_37.1	Temp_1	25 C	75 % RH	Z. m. y	female	28	9	0.526	0.0288295	Right	Forewing	uns	int	141.768	0.94065	3.3888	0.0205216	NA	NA	NA	NA	109	0.143254
816	moore	25-37-11	Ghana	2	moore_37.1	Temp_1	25 C	75 % RH	Z. m. y	male	29	10	0.5143	0.0276275	Left	Forewing	ups	dry	145.231	0.83735	2.8896	0.00473243	NA	NA	NA	NA	109	0.0687927
649	moore	25-37-12	Ghana	2	moore_37.1	Temp_1	25 C	75 % RH	Z. m. y	male	29	10	0.5348	0.0279898	Left	Forewing	ups	dry	140.157	0.8152	3.0362	0.00607574	NA	NA	NA	NA	109	0.0779471
867	moore	25-37-13	Ghana	2	moore_37.1	Temp_1	25 C	75 % RH	Z. m. y	male	31	9	0.3863	0.0234934	Right	Forewing	uns	dry	119.621	0.9477	3.2634	0.00419835	NA	NA	NA	NA	109	0.0647946
855	moore	25-37-14	Ghana	2	moore_37.1	Temp_1	25 C	75 % RH	Z. m. y	male	31	10	0.4607	0.0249141	Left	Forewing	ups	dry	136.473	0.9741	3.1802	0.00437732	NA	NA	NA	NA	109	0.0661613
650	moore	25-37-15	Ghana	2	moore_37.1	Temp_1	25 C	75 % RH	Z. m. y	female	36	9	0.3227	0.019053	Right	Forewing	uns	int	105.748	0.84825	3.34125	0.0120116	NA	NA	NA	NA	109	0.109598
839	moore	25-41-03	Ghana	2	moore_41.1	Temp_1	25 C	75 % RH	Z. m. y	male	NA	NA	NA	NA	Right	Forewing	uns	dry	132.976	0.8824	3.11325	0.00323405	NA	NA	NA	NA	111	0.0568687
813	moore	25-41-04	Ghana	2	moore_41.1	Temp_1	25 C	75 % RH	Z. m. y	male	26	10	0.5847	0.0321616	Right	Forewing	uns	dry	144.986	1.05485	3.59795	0.00497754	NA	NA	NA	NA	111	0.0705517
662	moore	25-41-06	Ghana	2	moore_41.1	Temp_1	25 C	75 % RH	Z. m. y	female	27	10	0.5501	0.0303471	Right	Forewing	uns	int	153.7	1.17255	4.8433	0.006796	NA	NA	NA	NA	111	0.0824378
763	moore	25-41-07	Ghana	2	moore_41.1	Temp_1	25 C	75 % RH	Z. m. y	male	27	10	0.5242	0.0298631	Left	Forewing	ups	dry	142.21	0.7127	2.40685	0.00508573	NA	NA	NA	NA	111	0.0713143
651	moore	25-41-08	Ghana	2	moore_41.1	Temp_1	25 C	75 % RH	Z. m. y	female	28	9	0.4109	0.0265514	Right	Forewing	uns	int	130.353	1.0578	3.55005	0.00751239	NA	NA	NA	NA	111	0.0866741
678	moore	25-41-09	Ghana	2	moore_41.1	Temp_1	25 C	75 % RH	Z. m. y	female	29	10	0.4561	0.0265433	Right	Forewing	uns	int	143.536	1.20635	4.5397	0.00745704	NA	NA	NA	NA	111	0.0863542
2907	hallow	1_27_55	India	1	hallow_12	Temp_HR	27 C	55 % RH	Z. m. y	NA	17	8	0.4065	0.0435751	Right	Forewing	uns	wet	84.3446	NA	1.1439	0.0493084	NA	NA	NA	NA	NA	0.222055
2917	hallow	10_27_55	India	1	hallow_12	Temp_HR	27 C	55 % RH	Z. m. y	female	24	7	0.3342	0.0289151	Right	Forewing	uns	wet	104.34	NA	1.4263	0.0704351	NA	NA	NA	NA	NA	0.265396
2927	hallow	11_27_55	India	1	hallow_12	Temp_HR	27 C	55 % RH	Z. m. y	male	24	7	0.3492	0.0293414	Right	Forewing	uns	wet	105.873	NA	1.5228	0.0292094	NA	NA	NA	NA	NA	0.170908
2937	hallow	12_27_55	India	1	hallow_12	Temp_HR	27 C	55 % RH	Z. m. y	female	24	7	0.4839	0.032712	Right	Forewing	uns	NA	NA	NA	NA	NA	NA	NA	NA	NA	NA	NA
2947	hallow	13_27_55	India	1	hallow_21	Temp_HR	27 C	55 % RH	Z. m. y	female	21	7	0.3912	0.0348268	Right	Forewing	uns	wet	104.237	NA	1.6355	0.0575562	NA	NA	NA	NA	NA	0.239909
2957	hallow	14_27_55	India	1	hallow_21	Temp_HR	27 C	55 % RH	Z. m. y	female	21	7	0.3343	0.0330491	Right	Forewing	uns	wet	115.839	NA	1.9511	0.0650283	NA	NA	NA	NA	NA	0.255006
2967	hallow	15_27_55	India	1	hallow_21	Temp_HR	27 C	55 % RH	Z. m. y	female	22	8	0.3745	0.0327638	Right	Forewing	uns	dry	137.098	NA	3.0493	0.0104604	NA	NA	NA	NA	NA	0.102276
2975	hallow	16_27_55	India	1	hallow_10	Temp_HR	27 C	55 % RH	Z. m. y	male	25	11	0.3633	0.0285418	Right	Forewing	uns	dry	120.071	NA	4.1195	0.0074198	NA	NA	NA	NA	NA	0.0861383
2985	hallow	17_27_55	India	1	hallow_10	Temp_HR	27 C	55 % RH	Z. m. y	female	25	7	0.3565	0.0283626	Right	Forewing	uns	dry	117.496	NA	2.677	0.0496339	NA	NA	NA	NA	NA	0.222787
2995	hallow	18_27_55	India	1	hallow_20	Temp_HR	27 C	55 % RH	Z. m. y	male	22	10	0.4143	0.0338856	Right	Forewing	uns	dry	130.365	NA	2.9981	0.0123867	NA	NA	NA	NA	NA	0.111296
3005	hallow	19_27_55	India	1	hallow_20	Temp_HR	27 C	55 % RH	Z. m. y	female	22	10	0.4366	0.034483	Right	Forewing	uns	wet	141.279	NA	2.1435	0.0400229	NA	NA	NA	NA	NA	0.200057
3015	hallow	2_27_55	India	1	hallow_12	Temp_HR	27 C	55 % RH	Z. m. y	male	17	8	0.2674	0.037897	Right	Forewing	NA	NA	NA	NA	NA	NA	NA	NA	NA	NA	NA	NA
3025	hallow	20_27_55	India	1	hallow_20	Temp_HR	27 C	55 % RH	Z. m. y	male	22	10	0.3464	0.031923	Right	Forewing	NA	dry	108.648	NA	1.4592	0.0133743	NA	NA	NA	NA	NA	0.115648
3035	hallow	21_27_55	India	1	hallow_20	Temp_HR	27 C	55 % RH	Z. m. y	female	22	NA	0.3316	0.0314617	Right	Forewing	NA	NA	NA	NA	NA	NA	NA	NA	NA	NA	NA	NA
3045	hallow	22_27_55	India	1	hallow_20	Temp_HR	27 C	55 % RH	Z. m. y	female	22	9	0.4049	0.0336274	Right	Forewing	NA	dry	132.524	NA	3.5706	0.00754202	NA	NA	NA	NA	NA	0.0868448
3055	hallow	23_27_55	India	1	hallow_20	Temp_HR	27 C	55 % RH	Z. m. y	female	22	9	0.3793	0.0329032	Right	Forewing	NA	wet	112.518	NA	1.6728	0.0365737	NA	NA	NA	NA	NA	0.191243
3063	hallow	24_27_55	India	1	hallow_21	Temp_HR	27 C	55 % RH	Z. m. y	female	25	5	0.3433	0.0280082	Right	Forewing	NA	wet	131.049	NA	2.369	0.0717167	NA	NA	NA	NA	NA	0.2678
3071	hallow	25_27_55	India	1	hallow_21	Temp_HR	27 C	55 % RH	Z. m. y	female	25	10	0.4094	0.0297013	Right	Forewing	NA	dry	144.201	NA	2.5152	0.0226531	NA	NA	NA	NA	NA	0.150509
3079	hallow	26_27_55	India	1	hallow_21	Temp_HR	27 C	55 % RH	Z. m. y	male	25	12	0.4196	0.029946	Right	Forewing	NA	wet	111.349	NA	1.359	0.0495297	NA	NA	NA	NA	NA	0.222553
3087	hallow	27_27_55	India	1	hallow_21	Temp_HR	27 C	55 % RH	Z. m. y	male	27	NA	0.3106	0.0250825	Right	Forewing	NA	dry	NA	NA	NA	NA	NA	NA	NA	NA	NA	NA
3095	hallow	28_27_55	India	1	hallow_21	Temp_HR	27 C	55 % RH	Z. m. y	female	27	7	0.4681	0.0287574	Right	Forewing	NA	wet	150.682	NA	4.0058	0.025084	NA	NA	NA	NA	NA	0.158379
3101	hallow	29_27_55	India	1	hallow_20	Temp_HR	27 C	55 % RH	Z. m. y	male	24	7	0.3675	0.0298452	Right	Forewing	NA	dry	125.446	NA	2.3652	0.00621143	NA	NA	NA	NA	NA	0.0788126
3109	hallow	3_27_55	India	1	hallow_12	Temp_HR	27 C	55 % RH	Z. m. y	female	17	8	0.3959	0.043193	Right	Forewing	NA	wet	NA	NA	NA	NA	NA	NA	NA	NA	NA	NA
3117	hallow	30_27_55	India	1	hallow_20	Temp_HR	27 C	55 % RH	Z. m. y	female	24	10	0.419	0.0311789	Right	Forewing	NA	dry	147.739	NA	3.4361	0.00940643	NA	NA	NA	NA	NA	0.0969868
3123	hallow	31_27_55	India	1	hallow_20	Temp_HR	27 C	55 % RH	Z. m. y	male	24	7	0.3164	0.0283923	Right	Forewing	NA	wet	NA	NA	NA	NA	NA	NA	NA	NA	NA	NA
3129	hallow	32_27_55	India	1	hallow_20	Temp_HR	27 C	55 % RH	Z. m. y	male	24	NA	0.3834	0.0302696	Right	Forewing	NA	NA	NA	NA	NA	NA	NA	NA	NA	NA	NA	NA
3135	hallow	33_27_55	India	1	hallow_20	Temp_HR	27 C	55 % RH	Z. m. y	female	24	NA	0.3122	0.0282661	Right	Forewing	NA	NA	NA	NA	NA	NA	NA	NA	NA	NA	NA	NA
3141	hallow	34_27_55	India	1	hallow_20	Temp_HR	27 C	55 % RH	Z. m. y	female	24	NA	0.3069	0.0281053	Right	Forewing	NA	NA	NA	NA	NA	NA	NA	NA	NA	NA	NA	NA
3147	hallow	35_27_55	India	1	hallow_20	Temp_HR	27 C	55 % RH	Z. m. y	male	24	10	0.3721	0.0299692	Right	Forewing	NA	dry	134.893	NA	1.9316	0.0134365	NA	NA	NA	NA	NA	0.115916
3171	hallow	4_27_55	India	1	hallow_10	Temp_HR	27 C	55 % RH	Z. m. y	male	18	NA	0.5013	0.0441327	Right	Forewing	NA	NA	NA	NA	NA	NA	NA	NA	NA	NA	NA	NA
3199	hallow	5_27_55	India	1	hallow_12	Temp_HR	27 C	55 % RH	Z. m. y	male	23	NA	0.322	0.0298005	Right	Forewing	NA	NA	NA	NA	NA	NA	NA	NA	NA	NA	NA	NA
3229	hallow	6_27_55	India	1	hallow_16	Temp_HR	27 C	55 % RH	Z. m. y	female	23	8	0.3961	0.0319306	Right	Forewing	NA	wet	113.426	NA	2.8023	0.043007	NA	NA	NA	NA	NA	0.207381
3245	hallow	7_27_55	India	1	hallow_16	Temp_HR	27 C	55 % RH	Z. m. y	female	23	13	0.4649	0.0336815	Right	Forewing	NA	wet	NA	NA	NA	NA	NA	NA	NA	NA	NA	NA
3253	hallow	8_27_55	India	1	hallow_10	Temp_HR	27 C	55 % RH	Z. m. y	male	25	7	0.3275	0.0275717	Right	Forewing	NA	dry	104.687	NA	1.9337	0.054299	NA	NA	NA	NA	NA	0.233021
3263	hallow	9_27_55	India	1	hallow_10	Temp_HR	27 C	55 % RH	Z. m. y	female	25	9	0.4132	0.0297929	Right	Forewing	NA	dry	122.368	NA	3.1136	0.00523828	NA	NA	NA	NA	NA	0.0723759
3269	hallow	1_27_85	India	unk	NA	Temp_HR	27 C	85 % RH	Z. m. y	NA	NA	NA	NA	NA	Right	Forewing	uns	NA	108.289	NA	1.909	0.0487103	NA	NA	NA	NA	NA	0.220704
3271	hallow	10_27_85	India	unk	NA	Temp_HR	27 C	85 % RH	Z. m. y	NA	NA	NA	NA	NA	Right	Forewing	uns	NA	96.0431	NA	0.6411	0.03518	NA	NA	NA	NA	NA	0.187563
3275	hallow	11_27_85	India	unk	NA	Temp_HR	27 C	85 % RH	Z. m. y	NA	NA	NA	NA	NA	Right	Forewing	uns	NA	113.779	NA	2.2181	0.0518529	NA	NA	NA	NA	NA	0.227712
3277	hallow	12_27_85	India	unk	NA	Temp_HR	27 C	85 % RH	Z. m. y	NA	NA	NA	NA	NA	Right	Forewing	uns	NA	90.8993	NA	0.9184	0.0654537	NA	NA	NA	NA	NA	0.255839
3283	hallow	14_27_85	India	unk	NA	Temp_HR	27 C	85 % RH	Z. m. y	NA	NA	NA	NA	NA	Right	Forewing	uns	NA	123.655	NA	1.8147	0.0356031	NA	NA	NA	NA	NA	0.188688
3287	hallow	15_27_85	India	unk	NA	Temp_HR	27 C	85 % RH	Z. m. y	NA	NA	NA	NA	NA	Right	Forewing	uns	NA	142.583	NA	2.2003	0.0633146	NA	NA	NA	NA	NA	0.251624
3291	hallow	16_27_85	India	unk	NA	Temp_HR	27 C	85 % RH	Z. m. y	NA	NA	NA	NA	NA	Right	Forewing	uns	NA	107.922	NA	2.2387	0.0477132	NA	NA	NA	NA	NA	0.218434
3295	hallow	17_27_85	India	unk	NA	Temp_HR	27 C	85 % RH	Z. m. y	NA	NA	NA	NA	NA	Right	Forewing	uns	NA	100.071	NA	1.7266	0.0550998	NA	NA	NA	NA	NA	0.234733
3299	hallow	18_27_85	India	unk	NA	Temp_HR	27 C	85 % RH	Z. m. y	NA	NA	NA	NA	NA	Right	Forewing	uns	NA	110.117	NA	1.5528	0.0573955	NA	NA	NA	NA	NA	0.239574
3303	hallow	19_27_85	India	unk	NA	Temp_HR	27 C	85 % RH	Z. m. y	NA	NA	NA	NA	NA	Right	Forewing	uns	NA	99.9474	NA	1.1411	0.0312755	NA	NA	NA	NA	NA	0.176849
3307	hallow	2_27_85	India	unk	NA	Temp_HR	27 C	85 % RH	Z. m. y	NA	NA	NA	NA	NA	Right	Forewing	NA	NA	110.906	NA	1.9023	0.0439839	NA	NA	NA	NA	NA	0.209723
3317	hallow	23_27_85	India	unk	NA	Temp_HR	27 C	85 % RH	Z. m. y	NA	NA	NA	NA	NA	Right	Forewing	NA	NA	91.0888	NA	1.5638	0.0478138	NA	NA	NA	NA	NA	0.218664
3323	hallow	25_27_85	India	unk	NA	Temp_HR	27 C	85 % RH	Z. m. y	NA	NA	NA	NA	NA	Right	Forewing	NA	NA	138.775	NA	2.6082	0.0629134	NA	NA	NA	NA	NA	0.250825
3327	hallow	26_27_85	India	unk	NA	Temp_HR	27 C	85 % RH	Z. m. y	NA	NA	NA	NA	NA	Right	Forewing	NA	NA	120.3	NA	2.6593	0.0482561	NA	NA	NA	NA	NA	0.219673
3331	hallow	27_27_85	India	unk	NA	Temp_HR	27 C	85 % RH	Z. m. y	NA	NA	NA	NA	NA	Right	Forewing	NA	NA	126.077	NA	1.675	0.0493492	NA	NA	NA	NA	NA	0.222147
3333	hallow	28_27_85	India	unk	NA	Temp_HR	27 C	85 % RH	Z. m. y	NA	NA	NA	NA	NA	Right	Forewing	NA	NA	105.167	NA	0.9969	0.0663633	NA	NA	NA	NA	NA	0.257611
3335	hallow	29_27_85	India	unk	NA	Temp_HR	27 C	85 % RH	Z. m. y	NA	NA	NA	NA	NA	Right	Forewing	NA	NA	86.4792	NA	1.3352	0.0331294	NA	NA	NA	NA	NA	0.182015
3339	hallow	3_27_85	India	unk	NA	Temp_HR	27 C	85 % RH	Z. m. y	NA	NA	NA	NA	NA	Right	Forewing	NA	NA	120.288	NA	1.633	0.0589701	NA	NA	NA	NA	NA	0.242838
3341	hallow	30_27_85	India	unk	NA	Temp_HR	27 C	85 % RH	Z. m. y	NA	NA	NA	NA	NA	Right	Forewing	NA	NA	118.466	NA	3.3325	0.00727043	NA	NA	NA	NA	NA	0.0852668
3343	hallow	31_27_85	India	unk	NA	Temp_HR	27 C	85 % RH	Z. m. y	NA	NA	NA	NA	NA	Right	Forewing	NA	NA	123.269	NA	2.3848	0.0517916	NA	NA	NA	NA	NA	0.227578
3345	hallow	32_27_85	India	unk	NA	Temp_HR	27 C	85 % RH	Z. m. y	NA	NA	NA	NA	NA	Right	Forewing	NA	NA	118.162	NA	1.5483	0.0238605	NA	NA	NA	NA	NA	0.154469
3347	hallow	33_27_85	India	unk	NA	Temp_HR	27 C	85 % RH	Z. m. y	NA	NA	NA	NA	NA	Right	Forewing	NA	NA	131.08	NA	3.2019	0.0138945	NA	NA	NA	NA	NA	0.117875
3349	hallow	34_27_85	India	unk	NA	Temp_HR	27 C	85 % RH	Z. m. y	NA	NA	NA	NA	NA	Right	Forewing	NA	NA	123.23	NA	2.2071	0.0358646	NA	NA	NA	NA	NA	0.189379
3357	hallow	6_27_85	India	unk	NA	Temp_HR	27 C	85 % RH	Z. m. y	NA	NA	NA	NA	NA	Right	Forewing	NA	NA	103.672	NA	1.4159	0.0532149	NA	NA	NA	NA	NA	0.230684
3365	hallow	9_27_85	India	unk	NA	Temp_HR	27 C	85 % RH	Z. m. y	NA	NA	NA	NA	NA	Right	Forewing	NA	NA	121.004	NA	1.9499	0.0469769	NA	NA	NA	NA	NA	0.216742
325	moore	28-10-03	Ghana	2	Temp_10.1	Temp_1	28 C	75 % RH	Z. m. y	male	NA	NA	NA	NA	Left	Forewing	ups	wet	106.819	0.20205	0.2033	0.0351234	NA	NA	NA	NA	102	0.187412
129	moore	28-10-04	Ghana	2	Temp_10.1	Temp_1	28 C	75 % RH	Z. m. y	female	NA	NA	NA	NA	Right	Forewing	uns	wet	136.62	0.494	1.53975	0.0511543	NA	NA	NA	NA	102	0.226173
144	moore	28-10-05	Ghana	2	Temp_10.1	Temp_1	28 C	75 % RH	Z. m. y	female	NA	NA	NA	NA	Left	Forewing	ups	wet	129.576	0.391	1.2959	0.0488196	NA	NA	NA	NA	102	0.220952
507	moore	28-10-06	Ghana	2	Temp_10.1	Temp_1	28 C	75 % RH	Z. m. y	male	NA	NA	NA	NA	Left	Forewing	ups	wet	111.968	0.18865	0.148665	0.0220729	NA	NA	NA	NA	102	0.14857
266	moore	28-10-07	Ghana	2	Temp_10.1	Temp_1	28 C	75 % RH	Z. m. y	female	NA	NA	NA	NA	Left	Forewing	ups	wet	126.25	0.20305	0.718	0.0363507	NA	NA	NA	NA	102	0.190659
242	moore	28-10-10	Ghana	2	Temp_10.1	Temp_1	28 C	75 % RH	Z. m. y	female	NA	NA	NA	NA	Right	Forewing	uns	wet	137.732	0.6611	2.45465	0.0294102	NA	NA	NA	NA	102	0.171494
404	moore	28-10-13	Ghana	2	Temp_10.1	Temp_1	28 C	75 % RH	Z. m. y	female	22	NA	0.3563	0.0322242	Right	Forewing	uns	wet	90.9044	0.56475	1.8509	0.028461	NA	NA	NA	NA	102	0.168704
590	moore	28-11-02	Ghana	3	Temp_11.2	Temp_2	28 C	75 % RH	Z. m. y	female	17	5	0.506	0.0468743	Left	Forewing	ups	wet	136.422	0.5977	1.88985	0.0403717	NA	NA	NA	NA	156	0.200927
200	moore	28-11-03	Ghana	2	Temp_11.1	Temp_1	28 C	75 % RH	Z. m. y	female	NA	NA	NA	NA	Left	Forewing	ups	wet	140.143	0.54895	1.64815	0.0343132	NA	NA	NA	NA	102	0.185238
408	moore	28-11-04	Ghana	2	Temp_11.1	Temp_1	28 C	75 % RH	Z. m. y	female	NA	NA	NA	NA	Left	Forewing	ups	wet	132.476	0.6824	2.2362	0.028489	NA	NA	NA	NA	102	0.168787
263	moore	28-11-08	Ghana	2	Temp_11.1	Temp_1	28 C	75 % RH	Z. m. y	female	16	5	0.4442	0.0476877	Right	Forewing	uns	wet	121.345	0.3459	1.42595	0.0307763	NA	NA	NA	NA	102	0.175432
460	moore	28-11-09	Ghana	2	Temp_11.1	Temp_1	28 C	75 % RH	Z. m. y	male	16	6	0.4329	0.0472798	Left	Forewing	ups	wet	94.4741	0.18085	0.40475	0.0285988	NA	NA	NA	NA	102	0.169112
462	moore	28-11-10	Ghana	2	Temp_11.1	Temp_1	28 C	75 % RH	Z. m. y	female	16	6	0.4723	0.0486728	Left	Forewing	ups	wet	118.565	0.53015	1.4713	0.0268821	NA	NA	NA	NA	102	0.163958
174	moore	28-11-11	Ghana	2	Temp_11.1	Temp_1	28 C	75 % RH	Z. m. y	female	16	6	0.4105	0.0464499	Left	Forewing	ups	wet	116.396	0.37605	1.0452	0.0450643	NA	NA	NA	NA	102	0.212284
156	moore	28-11-12	Ghana	2	Temp_11.1	Temp_1	28 C	75 % RH	Z. m. y	female	17	8	0.4642	0.0455463	Right	Forewing	uns	wet	128.702	0.5273	1.7846	0.045179	NA	NA	NA	NA	102	0.212553
53	moore	28-12-01	Ghana	3	Temp_12.2	Temp_2	28 C	75 % RH	Z. m. y	male	15	6	0.4341	0.0504784	Right	Forewing	uns	wet	112.334	0.298	0.67565	0.0400744	NA	NA	NA	NA	156	0.200186
608	moore	28-12-03	Ghana	3	Temp_12.2	Temp_2	28 C	75 % RH	Z. m. y	female	16	6	0.3994	0.0460274	Left	Forewing	ups	wet	118.89	0.44495	1.3406	0.0586244	NA	NA	NA	NA	156	0.242125
578	moore	28-12-05	Ghana	3	Temp_12.2	Temp_2	28 C	75 % RH	Z. m. y	female	17	6	0.4623	0.045484	Left	Forewing	ups	wet	133.641	0.53805	1.8765	0.0476506	NA	NA	NA	NA	156	0.21829
611	moore	28-12-06	Ghana	3	Temp_12.2	Temp_2	28 C	75 % RH	Z. m. y	female	18	6	0.5184	0.0446289	Right	Forewing	uns	wet	154.11	0.58765	2.0171	0.0510043	NA	NA	NA	NA	156	0.225841
859	moore	28-12-08	Ghana	3	Temp_12.2	Temp_2	28 C	75 % RH	Z. m. y	female	19	6	0.404	0.0389081	Left	Forewing	ups	wet	117.493	0.4837	1.8091	0.0881037	NA	NA	NA	NA	156	0.296823
55	moore	28-13-01	Ghana	3	Temp_13.2	Temp_2	28 C	75 % RH	Z. m. y	male	15	6	0.4871	0.0524543	Right	Forewing	uns	wet	109.312	0.20865	0.41435	0.0536104	NA	NA	NA	NA	156	0.231539
56	moore	28-13-02	Ghana	3	Temp_13.2	Temp_2	28 C	75 % RH	Z. m. y	male	15	6	0.426	0.0501624	Left	Forewing	ups	wet	95.2897	0.144755	0.3676	0.05015	NA	NA	NA	NA	156	0.223942
878	moore	28-13-06	Ghana	3	Temp_13.2	Temp_2	28 C	75 % RH	Z. m. y	male	17	6	0.3841	0.0427595	Left	Forewing	ups	wet	82.4993	0.23075	0.6905	0.0546217	NA	NA	NA	NA	156	0.233713
999	moore	28-14-01	Ghana	3	Temp_14.2	Temp_2	28 C	75 % RH	Z. m. y	male	16	5	0.4665	0.0484727	Right	Forewing	uns	wet	109.893	0.2138	0.28525	0.0388479	NA	NA	NA	NA	158	0.197099
94	moore	28-14-03	Ghana	3	Temp_14.2	Temp_2	28 C	75 % RH	Z. m. y	male	17	6	0.3902	0.0429847	Left	Forewing	ups	wet	95.9041	0.12915	0.29645	0.0513035	NA	NA	NA	NA	158	0.226503
50	moore	28-14-04	Ghana	3	Temp_14.2	Temp_2	28 C	75 % RH	Z. m. y	male	17	7	0.3954	0.0431748	Right	Forewing	uns	wet	97.7875	0.29175	0.84505	0.0469949	NA	NA	NA	NA	158	0.216783
92	moore	28-14-05	Ghana	3	Temp_14.2	Temp_2	28 C	75 % RH	Z. m. y	male	18	6	0.3943	0.0407383	Left	Forewing	ups	wet	99.2536	0.2979	0.8194	0.0478065	NA	NA	NA	NA	158	0.218647
46	moore	28-14-07	Ghana	3	Temp_14.2	Temp_2	28 C	75 % RH	Z. m. y	male	19	6	0.4184	0.039365	Left	Forewing	ups	wet	106.48	0.31465	0.65155	0.0383207	NA	NA	NA	NA	158	0.195757
730	moore	28-14-08	Ghana	3	Temp_14.2	Temp_2	28 C	75 % RH	Z. m. y	male	19	6	0.3715	0.0378355	Right	Forewing	uns	wet	100.148	0.3762	1.0939	0.0381207	NA	NA	NA	NA	158	0.195245
519	moore	28-14-10	Ghana	3	Temp_14.2	Temp_2	28 C	75 % RH	Z. m. y	female	21	7	0.4826	0.0373517	Right	Forewing	uns	wet	149.017	0.5975	1.7623	0.0286676	NA	NA	NA	NA	158	0.169315
827	moore	28-14-12	Ghana	3	Temp_14.2	Temp_2	28 C	75 % RH	Z. m. y	female	24	6	0.2522	0.0263251	Left	Forewing	ups	wet	86.0774	0.4464	1.6828	0.0215998	NA	NA	NA	NA	158	0.146969
880	moore	28-14-13	Ghana	3	Temp_14.2	Temp_2	28 C	75 % RH	Z. m. y	female	27	6	0.6031	0.031292	Right	Forewing	uns	wet	147.353	0.6136	2.4517	0.0480677	NA	NA	NA	NA	158	0.219243
51	moore	28-15-03	Ghana	3	Temp_15.2	Temp_2	28 C	75 % RH	Z. m. y	male	17	6	0.4159	0.0439084	Right	Forewing	uns	wet	107.763	0.2698	0.90775	0.0381347	NA	NA	NA	NA	160	0.195281
48	moore	28-15-05	Ghana	3	Temp_15.2	Temp_2	28 C	75 % RH	Z. m. y	male	18	6	0.3408	0.0388056	Right	Forewing	uns	wet	102.171	0.25755	0.75905	0.038464	NA	NA	NA	NA	160	0.196122
47	moore	28-15-06	Ghana	3	Temp_15.2	Temp_2	28 C	75 % RH	Z. m. y	female	18	6	0.447	0.0424779	Right	Forewing	uns	wet	134.602	0.61175	2.1324	0.0503529	NA	NA	NA	NA	160	0.224394
91	moore	28-15-08	Ghana	3	Temp_15.2	Temp_2	28 C	75 % RH	Z. m. y	male	19	5	0.3576	0.0373576	Left	Forewing	ups	wet	101.413	0.3025	0.7052	0.0499618	NA	NA	NA	NA	160	0.223521
669	moore	28-16-01	Ghana	3	Temp_16.2	Temp_2	28 C	75 % RH	Z. m. y	male	15	6	0.4739	0.0519762	Left	Forewing	ups	wet	119.723	0.26465	0.8118	0.0314788	NA	NA	NA	NA	161	0.177423
289	moore	28-16-01a	Ghana	2	Temp_16.1	Temp_1	28 C	75 % RH	Z. m. y	male	14	6	0.3112	0.0484044	Right	Forewing	uns	wet	87.2538	0.074855	0.12191	0.0476569	NA	NA	NA	NA	105	0.218305
493	moore	28-16-02	Ghana	2	Temp_16.1	Temp_1	28 C	75 % RH	Z. m. y	male	15	5	0.4074	0.0494215	Left	Forewing	ups	wet	92.01	0.049115	0.19905	0.0341967	NA	NA	NA	NA	105	0.184923
52	moore	28-16-03	Ghana	3	Temp_16.2	Temp_2	28 C	75 % RH	Z. m. y	male	16	6	0.4119	0.0465026	Right	Forewing	uns	wet	103.706	0.28875	0.6907	0.0531601	NA	NA	NA	NA	161	0.230565
155	moore	28-16-03a	Ghana	2	Temp_16.1	Temp_1	28 C	75 % RH	Z. m. y	male	16	5	0.4397	0.0475261	Left	Forewing	ups	wet	110.791	0.150375	0.308485	0.0524235	NA	NA	NA	NA	105	0.228962
273	moore	28-16-04	Ghana	2	Temp_16.1	Temp_1	28 C	75 % RH	Z. m. y	male	16	6	0.3337	0.043351	Right	Forewing	uns	wet	76.1719	0.1739	0.2828	0.0636862	NA	NA	NA	NA	105	0.252361
117	moore	28-16-07	Ghana	2	Temp_16.1	Temp_1	28 C	75 % RH	Z. m. y	female	17	6	0.4308	0.0444266	Left	Forewing	ups	wet	126.901	0.48765	1.27755	0.0676256	NA	NA	NA	NA	105	0.260049
312	moore	28-16-08	Ghana	2	Temp_16.1	Temp_1	28 C	75 % RH	Z. m. y	male	17	6	0.3532	0.0415807	Left	Forewing	ups	wet	85.0413	0.19845	0.6829	0.0486949	NA	NA	NA	NA	105	0.220669
574	moore	28-16-11	Ghana	3	Temp_16.2	Temp_2	28 C	75 % RH	Z. m. y	female	23	7	0.3731	0.0313002	Right	Forewing	uns	wet	128.493	0.542	2.00415	0.0342674	NA	NA	NA	NA	160	0.185115
517	moore	28-17-01	Ghana	2	Temp_17.1	Temp_1	28 C	75 % RH	Z. m. y	male	16	NA	0.4187	0.0467571	Right	Forewing	uns	wet	88.6792	0.08486	0.09562	0.0341251	NA	NA	NA	NA	104	0.18473
310	moore	28-17-04	Ghana	2	Temp_17.1	Temp_1	28 C	75 % RH	Z. m. y	female	17	6	0.3168	0.0401002	Left	Forewing	ups	wet	94.7566	0.2554	0.8953	0.0415677	NA	NA	NA	NA	104	0.203881
298	moore	28-17-05	Ghana	2	Temp_17.1	Temp_1	28 C	75 % RH	Z. m. y	male	17	NA	0.3403	0.0410681	Left	Forewing	ups	wet	81.6161	0.10745	0.5788	0.0482331	NA	NA	NA	NA	104	0.21962
571	moore	28-17-07	Ghana	2	Temp_17.1	Temp_1	28 C	75 % RH	Z. m. y	male	18	6	0.3907	0.040614	Left	Forewing	ups	wet	90.4163	0.07843	0.2684	0.0248093	NA	NA	NA	NA	104	0.15751
295	moore	28-17-09	Ghana	2	Temp_17.1	Temp_1	28 C	75 % RH	Z. m. y	female	20	NA	0.4184	0.0373968	Right	Forewing	uns	wet	117.293	0.5235	1.9308	0.0333042	NA	NA	NA	NA	104	0.182494
179	moore	28-20-01	Ghana	2	Temp_20.1	Temp_1	28 C	75 % RH	Z. m. y	male	16	6	0.4543	0.0480464	Right	Forewing	uns	wet	114.566	0.2745	0.5969	0.0499756	NA	NA	NA	NA	106	0.223552
202	moore	28-20-02	Ghana	2	Temp_20.1	Temp_1	28 C	75 % RH	Z. m. y	male	16	6	0.3728	0.044982	Right	Forewing	uns	wet	89.5757	0.17895	0.42675	0.0518961	NA	NA	NA	NA	106	0.227807
243	moore	28-20-06	Ghana	2	Temp_20.1	Temp_1	28 C	75 % RH	Z. m. y	female	19	8	0.4665	0.0408191	Left	Forewing	ups	wet	125.632	0.4447	1.5465	0.0378025	NA	NA	NA	NA	106	0.194429
184	moore	28-23-01	Ghana	2	Temp_23.1	Temp_1	28 C	75 % RH	Z. m. y	male	16	6	0.3915	0.0457219	Left	Forewing	ups	wet	99.4885	0.23055	0.61305	0.0529404	NA	NA	NA	NA	105	0.230088
337	moore	28-23-02	Ghana	2	Temp_23.1	Temp_1	28 C	75 % RH	Z. m. y	male	16	5	0.4178	0.0467236	Right	Forewing	uns	wet	106.701	0.25705	0.5667	0.0370621	NA	NA	NA	NA	105	0.192515
180	moore	28-23-03	Ghana	2	Temp_23.1	Temp_1	28 C	75 % RH	Z. m. y	male	16	6	0.4189	0.0467646	Right	Forewing	uns	wet	116.306	0.25485	0.5759	0.0448508	NA	NA	NA	NA	105	0.21178
417	moore	28-23-04	Ghana	2	Temp_23.1	Temp_1	28 C	75 % RH	Z. m. y	male	16	6	0.3818	0.0453411	Left	Forewing	ups	wet	102.75	0.2406	0.7147	0.0317048	NA	NA	NA	NA	105	0.178058
382	moore	28-23-05	Ghana	2	Temp_23.1	Temp_1	28 C	75 % RH	Z. m. y	male	16	6	0.3645	0.0446457	Left	Forewing	ups	wet	95.026	0.1158	0.1676	0.0369984	NA	NA	NA	NA	105	0.19235
239	moore	28-23-06	Ghana	2	Temp_23.1	Temp_1	28 C	75 % RH	Z. m. y	male	16	6	0.4118	0.0464988	Right	Forewing	uns	wet	95.7656	0.24175	0.66595	0.0476469	NA	NA	NA	NA	105	0.218282
447	moore	28-23-07	Ghana	2	Temp_23.1	Temp_1	28 C	75 % RH	Z. m. y	male	16	6	0.403	0.0461652	Left	Forewing	ups	wet	105.129	0.41665	0.95825	0.0322662	NA	NA	NA	NA	105	0.179628
346	moore	28-23-08	Ghana	2	Temp_23.1	Temp_1	28 C	75 % RH	Z. m. y	male	16	7	0.386	0.0455067	Right	Forewing	uns	wet	95.0379	0.17235	0.2324	0.0443694	NA	NA	NA	NA	105	0.21064
195	moore	28-23-09	Ghana	2	Temp_23.1	Temp_1	28 C	75 % RH	Z. m. y	female	17	6	0.5092	0.0469729	Left	Forewing	ups	wet	138.419	0.6511	2.2355	0.0370017	NA	NA	NA	NA	105	0.192358
321	moore	28-23-12	Ghana	2	Temp_23.1	Temp_1	28 C	75 % RH	Z. m. y	female	17	10	0.4174	0.0439611	Left	Forewing	ups	wet	119.391	0.51285	1.32015	0.0370637	NA	NA	NA	NA	105	0.192519
240	moore	28-23-14	Ghana	2	Temp_23.1	Temp_1	28 C	75 % RH	Z. m. y	female	17	10	0.406	0.0435572	Right	Forewing	uns	wet	123.197	0.43795	1.4803	0.0363044	NA	NA	NA	NA	105	0.190537
395	moore	28-23-15	Ghana	2	Temp_23.1	Temp_1	28 C	75 % RH	Z. m. y	male	17	10	0.4835	0.0461689	Left	Forewing	ups	wet	111.55	0.3282	0.93495	0.0348096	NA	NA	NA	NA	105	0.186573
385	moore	28-23-16	Ghana	2	Temp_23.1	Temp_1	28 C	75 % RH	Z. m. y	male	18	9	0.5276	0.0448913	Left	Forewing	ups	wet	117.276	0.4351	0.80835	0.0278118	NA	NA	NA	NA	105	0.166769
584	moore	28-23-18	Ghana	2	Temp_23.1	Temp_1	28 C	75 % RH	Z. m. y	male	18	9	0.4372	0.0421652	Left	Forewing	ups	wet	106.153	0.3011	0.6298	0.0218071	NA	NA	NA	NA	105	0.147672
491	moore	28-23-19	Ghana	2	Temp_23.1	Temp_1	28 C	75 % RH	Z. m. y	NA	18	11	0.2982	0.0371162	Left	Forewing	ups	wet	80.2683	0.18535	0.53635	0.0391967	NA	NA	NA	NA	105	0.197982
414	moore	28-23-20	Ghana	2	Temp_23.1	Temp_1	28 C	75 % RH	Z. m. y	male	18	9	0.3494	0.0391293	Left	Forewing	ups	wet	87.8171	0.2328	0.5112	0.0365134	NA	NA	NA	NA	105	0.191085
262	moore	28-23-22	Ghana	2	Temp_23.1	Temp_1	28 C	75 % RH	Z. m. y	female	19	8	0.3311	0.036411	Right	Forewing	uns	wet	99.1242	0.42255	1.2803	0.0436631	NA	NA	NA	NA	105	0.208957
424	moore	28-29-01	Ghana	2	Temp_29.1	Temp_1	28 C	75 % RH	Z. m. y	male	14	6	0.3967	0.0524839	Right	Forewing	uns	wet	96.1869	0.1753	0.5585	0.0374594	NA	NA	NA	NA	107	0.193544
260	moore	28-29-02	Ghana	2	Temp_29.1	Temp_1	28 C	75 % RH	Z. m. y	male	14	6	0.42	0.0534919	Right	Forewing	uns	wet	104.084	0.24795	0.31825	0.045206	NA	NA	NA	NA	107	0.212617
168	moore	28-29-03	Ghana	2	Temp_29.1	Temp_1	28 C	75 % RH	Z. m. y	male	14	6	0.3912	0.0522402	Right	Forewing	uns	wet	90.9514	0.1923	0.39705	0.064191	NA	NA	NA	NA	107	0.253359
249	moore	28-29-04	Ghana	2	Temp_29.1	Temp_1	28 C	75 % RH	Z. m. y	male	14	6	0.4463	0.054586	Right	Forewing	uns	wet	107.199	0.11795	0.01891	0.0387594	NA	NA	NA	NA	107	0.196874
555	moore	28-29-05	Ghana	2	Temp_29.1	Temp_1	28 C	75 % RH	Z. m. y	male	14	6	0.4737	0.0556809	Right	Forewing	uns	wet	113.335	0.2815	0.6687	0.0211463	NA	NA	NA	NA	107	0.145418
453	moore	28-29-06	Ghana	2	Temp_29.1	Temp_1	28 C	75 % RH	Z. m. y	male	14	6	0.4889	0.0562702	Left	Forewing	ups	wet	109.733	0.26685	0.4113	0.0293608	NA	NA	NA	NA	107	0.17135
140	moore	28-29-10	Ghana	2	Temp_29.1	Temp_1	28 C	75 % RH	Z. m. y	female	15	NA	0.4821	0.0522742	Left	Forewing	ups	wet	123.647	0.50135	1.6535	0.0514827	NA	NA	NA	NA	107	0.226898
163	moore	28-29-11	Ghana	2	Temp_29.1	Temp_1	28 C	75 % RH	Z. m. y	female	15	NA	0.4674	0.0517374	Right	Forewing	uns	wet	135.779	0.58275	1.78715	0.0438864	NA	NA	NA	NA	107	0.209491
280	moore	28-29-13	Ghana	2	Temp_29.1	Temp_1	28 C	75 % RH	Z. m. y	male	15	NA	0.4488	0.0510418	Left	Forewing	ups	wet	103.828	0.2459	0.59485	0.0392019	NA	NA	NA	NA	107	0.197995
419	moore	28-29-14	Ghana	2	Temp_29.1	Temp_1	28 C	75 % RH	Z. m. y	NA	16	9	0.4864	0.0491524	Left	Forewing	ups	wet	138.938	0.5794	1.973	0.0242831	NA	NA	NA	NA	107	0.15583
169	moore	28-29-16	Ghana	2	Temp_29.1	Temp_1	28 C	75 % RH	Z. m. y	female	16	9	0.5357	0.0507599	Left	Forewing	ups	wet	119.95	0.5351	1.60605	0.045028	NA	NA	NA	NA	107	0.212198
327	moore	28-29-17	Ghana	2	Temp_29.1	Temp_1	28 C	75 % RH	Z. m. y	female	16	9	0.4311	0.0472142	Left	Forewing	ups	wet	122.54	0.5474	1.98715	0.0333792	NA	NA	NA	NA	107	0.1827
316	moore	28-29-19	Ghana	2	Temp_29.1	Temp_1	28 C	75 % RH	Z. m. y	female	18	7	0.3941	0.0407314	Left	Forewing	ups	wet	127.196	0.58085	2.0381	0.0240005	NA	NA	NA	NA	107	0.154921
315	moore	28-29-20	Ghana	2	Temp_29.1	Temp_1	28 C	75 % RH	Z. m. y	female	18	7	0.3599	0.0395174	Left	Forewing	ups	wet	111.046	0.3582	1.5779	0.0205428	NA	NA	NA	NA	107	0.143328
461	moore	28-38-01	Ghana	2	moore_38.1	Temp_1	28 C	75 % RH	Z. m. y	male	14	11	0.4282	0.0538378	Left	Forewing	ups	wet	102.494	0.1749	0.31095	0.0276621	NA	NA	NA	NA	108	0.166319
464	moore	28-38-02	Ghana	2	moore_38.1	Temp_1	28 C	75 % RH	Z. m. y	male	14	11	0.4366	0.0541876	Left	Forewing	ups	wet	96.0593	0.2657	0.6084	0.0338104	NA	NA	NA	NA	108	0.183876
478	moore	28-38-04	Ghana	2	moore_38.1	Temp_1	28 C	75 % RH	Z. m. y	male	15	10	0.3748	0.0480664	Left	Forewing	ups	wet	87.7844	0.12025	0.3787	0.0344209	NA	NA	NA	NA	108	0.185529
188	moore	28-38-06	Ghana	2	moore_38.1	Temp_1	28 C	75 % RH	Z. m. y	male	16	8	0.3878	0.0455774	Left	Forewing	ups	wet	103.29	0.2978	0.5718	0.0545066	NA	NA	NA	NA	108	0.233467
205	moore	28-38-07	Ghana	2	moore_38.1	Temp_1	28 C	75 % RH	Z. m. y	male	16	9	0.5156	0.0501169	Right	Forewing	uns	wet	115.208	0.22545	0.63535	0.041688	NA	NA	NA	NA	108	0.204176
272	moore	28-38-11	Ghana	2	moore_38.1	Temp_1	28 C	75 % RH	Z. m. y	female	16	8	0.4761	0.0488029	Right	Forewing	uns	wet	133.397	0.70885	2.10115	0.0363088	NA	NA	NA	NA	108	0.190549
290	moore	28-38-12	Ghana	2	moore_38.1	Temp_1	28 C	75 % RH	Z. m. y	female	17	8	0.4411	0.0447779	Left	Forewing	ups	wet	122.83	0.43685	1.319	0.0333614	NA	NA	NA	NA	108	0.182651
182	moore	28-38-15	Ghana	2	moore_38.1	Temp_1	28 C	75 % RH	Z. m. y	female	17	8	0.4672	0.0456442	Right	Forewing	uns	wet	136.4	0.48935	1.7417	0.0387975	NA	NA	NA	NA	108	0.196971
452	moore	28-38-16	Ghana	2	moore_38.1	Temp_1	28 C	75 % RH	Z. m. y	NA	17	8	0.4576	0.0453294	Left	Forewing	ups	wet	115.188	0.3287	0.9227	0.0331941	NA	NA	NA	NA	108	0.182193
149	moore	28-42-01	Ghana	2	moore_42.1	Temp_1	28 C	75 % RH	Z. m. y	male	15	7	0.4413	0.0507559	Right	Forewing	uns	wet	109.783	0.2602	0.4862	0.0561607	NA	NA	NA	NA	111	0.236982
431	moore	28-42-02	Ghana	2	moore_42.1	Temp_1	28 C	75 % RH	Z. m. y	male	15	NA	0.4994	0.0528922	Right	Forewing	uns	wet	116.222	0.2503	0.5117	0.0296361	NA	NA	NA	NA	111	0.172151
524	moore	28-42-03	Ghana	2	moore_42.1	Temp_1	28 C	75 % RH	Z. m. y	male	16	6	0.3954	0.0458732	Left	Forewing	ups	wet	99.8722	0.2394	0.5209	0.0288112	NA	NA	NA	NA	111	0.169739
288	moore	28-42-04	Ghana	2	moore_42.1	Temp_1	28 C	75 % RH	Z. m. y	male	16	6	0.3481	0.0439658	Right	Forewing	uns	wet	109.658	0.3681	0.87845	0.0394953	NA	NA	NA	NA	111	0.198734
323	moore	28-42-05	Ghana	2	moore_42.1	Temp_1	28 C	75 % RH	Z. m. y	male	16	6	0.5032	0.0497119	Left	Forewing	ups	wet	117.959	0.335	0.65905	0.036613	NA	NA	NA	NA	111	0.191345
281	moore	28-42-06	Ghana	2	moore_42.1	Temp_1	28 C	75 % RH	Z. m. y	male	16	7	0.419	0.0467683	Right	Forewing	uns	wet	96.7057	0.3558	0.7781	0.0474605	NA	NA	NA	NA	111	0.217854
278	moore	28-42-07(2)	Ghana	2	moore_42.1	Temp_1	28 C	75 % RH	Z. m. y	female	NA	NA	NA	NA	Right	Forewing	uns	wet	97.8852	0.3848	1.3929	0.0494099	NA	NA	NA	NA	111	0.222283
309	moore	28-42-08	Ghana	2	moore_42.1	Temp_1	28 C	75 % RH	Z. m. y	female	17	7	0.3452	0.0412643	Right	Forewing	uns	wet	113.832	0.651	1.9784	0.0382782	NA	NA	NA	NA	111	0.195648
476	moore	28-42-10	Ghana	2	moore_42.1	Temp_1	28 C	75 % RH	Z. m. y	male	19	5	NA	NA	Left	Forewing	ups	wet	115.824	0.22775	0.30615	0.0250765	NA	NA	NA	NA	111	0.158355
213	moore	31-25-02	Ghana	2	Temp_25.1	Temp_1	31 C	75 % RH	Z. m. y	male	15	10	0.3841	0.0484608	Left	Forewing	ups	wet	106.796	0.2578	0.64965	0.0440892	NA	NA	NA	NA	107	0.209974
135	moore	31-25-04	Ghana	2	Temp_25.1	Temp_1	31 C	75 % RH	Z. m. y	female	15	6	0.4055	0.0493445	Right	Forewing	uns	wet	111.569	0.3803	1.34155	0.0581932	NA	NA	NA	NA	107	0.241233
430	moore	31-25-06	Ghana	2	Temp_25.1	Temp_1	31 C	75 % RH	Z. m. y	female	15	6	0.3707	0.0478905	Left	Forewing	ups	wet	98.889	0.1043	0.136855	0.0312874	NA	NA	NA	NA	107	0.176882
559	moore	31-25-08	Ghana	2	Temp_25.1	Temp_1	31 C	75 % RH	Z. m. y	male	15	6	0.3186	0.0455328	Left	Forewing	ups	wet	102.554	0.2375	0.7586	0.0179543	NA	NA	NA	NA	107	0.133993
542	moore	31-25-10	Ghana	2	Temp_25.1	Temp_1	31 C	75 % RH	Z. m. y	female	15	6	0.2996	0.044609	Right	Forewing	uns	wet	100.688	0.29305	1.03485	0.0242043	NA	NA	NA	NA	107	0.155577
533	moore	31-25-12	Ghana	2	Temp_25.1	Temp_1	31 C	75 % RH	Z. m. y	female	16	9	0.3336	0.0433466	Right	Forewing	uns	wet	98.6356	0.38115	1.6064	0.0237707	NA	NA	NA	NA	107	0.154178
543	moore	31-25-13	Ghana	2	Temp_25.1	Temp_1	31 C	75 % RH	Z. m. y	female	16	9	0.4016	0.0461117	Right	Forewing	uns	wet	109.262	0.3309	1.20675	0.0242125	NA	NA	NA	NA	107	0.155604
359	moore	31-25-14(2)	Ghana	2	Temp_25.1	Temp_1	31 C	75 % RH	Z. m. y	female	18	NA	0.42	0.0416048	Left	Forewing	ups	wet	124.013	0.47195	1.4384	0.0297339	NA	NA	NA	NA	107	0.172435
324	moore	31-25-15	Ghana	2	Temp_25.1	Temp_1	31 C	75 % RH	Z. m. y	male	NA	NA	0.3688	NA	Left	Forewing	ups	wet	98.9246	0.065405	0.086815	0.0429566	NA	NA	NA	NA	107	0.20726
256	moore	31-30-03	Ghana	2	moore_30.1	Temp_1	31 C	75 % RH	Z. m. y	NA	15	9	0.4544	0.0512533	Left	Forewing	ups	wet	112.84	0.42555	0.8591	0.0417203	NA	NA	NA	NA	108	0.204256
563	moore	31-30-04	Ghana	2	moore_30.1	Temp_1	31 C	75 % RH	Z. m. y	female	15	9	0.4039	0.0492795	Right	Forewing	uns	wet	115.347	0.4693	1.2565	0.0181938	NA	NA	NA	NA	108	0.134884
509	moore	31-30-08	Ghana	2	moore_30.1	Temp_1	31 C	75 % RH	Z. m. y	female	16	8	0.3701	0.0448731	Right	Forewing	uns	wet	112.64	0.39955	1.4726	0.0201208	NA	NA	NA	NA	108	0.141848
229	moore	31-30-10	Ghana	2	moore_30.1	Temp_1	31 C	75 % RH	Z. m. y	female	16	8	0.4117	0.0464951	Right	Forewing	uns	wet	119.387	0.3787	1.2868	0.0356569	NA	NA	NA	NA	108	0.18883
191	moore	31-30-11	Ghana	2	moore_30.1	Temp_1	31 C	75 % RH	Z. m. y	male	16	8	0.3674	0.0447637	Left	Forewing	ups	wet	97.1587	0.1673	0.34515	0.0531998	NA	NA	NA	NA	108	0.230651
591	moore	31-30-13	Ghana	2	moore_30.1	Temp_1	31 C	75 % RH	Z. m. y	female	16	8	0.4136	0.0465665	Right	Forewing	uns	wet	100.428	0.3298	1.1705	0.0184121	NA	NA	NA	NA	108	0.135691
439	moore	31-30-17	Ghana	2	moore_30.1	Temp_1	31 C	75 % RH	Z. m. y	male	17	7	0.3636	0.0419848	Left	Forewing	ups	wet	103.813	0.2688	0.6431	0.0277675	NA	NA	NA	NA	108	0.166636
361	moore	31-30-19	Ghana	2	moore_30.1	Temp_1	31 C	75 % RH	Z. m. y	NA	20	6	0.4083	0.0370934	Right	Forewing	uns	wet	129.584	0.34935	1.19085	0.0306638	NA	NA	NA	NA	108	0.175111
314	moore	31-31-01	Ghana	2	moore_31.1	Temp_1	31 C	75 % RH	Z. m. y	male	14	10	0.4019	0.0527122	Left	Forewing	ups	wet	105.14	0.2641	0.68905	0.0396593	NA	NA	NA	NA	108	0.199146
520	moore	31-31-03	Ghana	2	moore_31.1	Temp_1	31 C	75 % RH	Z. m. y	male	14	6	0.3553	0.0505907	Right	Forewing	uns	wet	90.0015	0.1529	0.4024	0.0257667	NA	NA	NA	NA	108	0.16052
444	moore	31-31-04	Ghana	2	moore_31.1	Temp_1	31 C	75 % RH	Z. m. y	male	14	6	0.3794	0.0517096	Left	Forewing	ups	wet	97.2192	0.122505	0.45205	0.0328481	NA	NA	NA	NA	108	0.18124
398	moore	31-31-05	Ghana	2	moore_31.1	Temp_1	31 C	75 % RH	Z. m. y	male	14	6	0.3895	0.0521644	Left	Forewing	ups	wet	99.5487	0.12215	0.3118	0.0329837	NA	NA	NA	NA	108	0.181614
387	moore	31-31-07	Ghana	2	moore_31.1	Temp_1	31 C	75 % RH	Z. m. y	female	15	9	0.4317	0.0503852	Left	Forewing	ups	wet	125.981	0.40775	1.37465	0.0266725	NA	NA	NA	NA	108	0.163317
320	moore	31-31-08	Ghana	2	moore_31.1	Temp_1	31 C	75 % RH	Z. m. y	male	15	9	0.3764	0.0481347	Right	Forewing	uns	wet	97.8101	0.17745	0.42635	0.0399433	NA	NA	NA	NA	108	0.199858
209	moore	31-31-09	Ghana	2	moore_31.1	Temp_1	31 C	75 % RH	Z. m. y	female	15	9	0.4555	0.0512946	Right	Forewing	uns	wet	124.844	0.3951	1.31135	0.0396485	NA	NA	NA	NA	108	0.199119
296	moore	31-31-10	Ghana	2	moore_31.1	Temp_1	31 C	75 % RH	Z. m. y	male	16	8	0.4843	0.0490815	Left	Forewing	ups	wet	115.355	0.1867	0.47875	0.0323677	NA	NA	NA	NA	108	0.17991
176	moore	31-31-13	Ghana	2	moore_31.1	Temp_1	31 C	75 % RH	Z. m. y	male	16	8	0.3766	0.0451343	Right	Forewing	uns	wet	102.581	0.26625	0.5914	0.0475635	NA	NA	NA	NA	108	0.218091
345	moore	31-31-14	Ghana	2	moore_31.1	Temp_1	31 C	75 % RH	Z. m. y	male	16	8	0.4207	0.0468314	Left	Forewing	ups	wet	99.1174	0.1389	0.39005	0.0318028	NA	NA	NA	NA	108	0.178333
436	moore	31-31-16	Ghana	2	moore_31.1	Temp_1	31 C	75 % RH	Z. m. y	male	17	7	0.3802	0.0426143	Right	Forewing	uns	wet	100.192	0.2241	0.6366	0.0341691	NA	NA	NA	NA	108	0.184849
351	moore	31-31-18	Ghana	2	moore_31.1	Temp_1	31 C	75 % RH	Z. m. y	male	NA	NA	NA	NA	Left	Forewing	ups	wet	101.659	0.137925	0.53005	0.0386057	NA	NA	NA	NA	108	0.196483
2	moore	31-31-19	Ghana	2	moore_31.1	Temp_1	31 C	75 % RH	Z. m. y	female	NA	NA	NA	NA	Right	Forewing	uns	wet	101.012	0.3558	1.3665	0.0367071	NA	NA	NA	NA	108	0.191591
277	moore	31-32-01	Ghana	2	moore_32.1	Temp_1	31 C	75 % RH	Z. m. y	male	14	9	0.372	0.0513712	Right	Forewing	uns	wet	91.1934	0.1957	0.43795	0.0471378	NA	NA	NA	NA	109	0.217112
379	moore	31-32-02	Ghana	2	moore_32.1	Temp_1	31 C	75 % RH	Z. m. y	male	14	9	0.4256	0.0537286	Right	Forewing	uns	wet	107.06	0.1132	0.1824	0.0325061	NA	NA	NA	NA	109	0.180294
525	moore	31-32-03	Ghana	2	moore_32.1	Temp_1	31 C	75 % RH	Z. m. y	male	14	9	0.4084	0.0529949	Left	Forewing	ups	wet	95.8458	0.065375	0.6585	0.0280449	NA	NA	NA	NA	109	0.167466
495	moore	31-32-04	Ghana	2	moore_32.1	Temp_1	31 C	75 % RH	Z. m. y	male	14	9	0.402	0.0527166	Right	Forewing	uns	wet	93.3174	0.1419	0.12889	0.0315946	NA	NA	NA	NA	109	0.177749
363	moore	31-32-07	Ghana	2	moore_32.1	Temp_1	31 C	75 % RH	Z. m. y	male	15	8	0.4728	0.0519359	Left	Forewing	ups	wet	111.099	0.2421	0.6203	0.0270902	NA	NA	NA	NA	109	0.164591
276	moore	31-32-08	Ghana	2	moore_32.1	Temp_1	31 C	75 % RH	Z. m. y	male	15	8	0.4164	0.0497828	Left	Forewing	ups	wet	96.9049	0.16325	0.1751	0.046337	NA	NA	NA	NA	109	0.21526
418	moore	31-32-09	Ghana	2	moore_32.1	Temp_1	31 C	75 % RH	Z. m. y	female	15	9	0.3616	0.0474954	Left	Forewing	ups	wet	110.933	0.3735	1.1768	0.0278041	NA	NA	NA	NA	109	0.166746
329	moore	31-32-10	Ghana	2	moore_32.1	Temp_1	31 C	75 % RH	Z. m. y	male	15	8	0.4371	0.0505944	Right	Forewing	uns	wet	103.449	0.3029	0.7754	0.0393661	NA	NA	NA	NA	109	0.198409
238	moore	31-32-15	Ghana	2	moore_32.1	Temp_1	31 C	75 % RH	Z. m. y	female	16	7	0.4576	0.0481625	Right	Forewing	uns	wet	127.516	0.4923	1.5724	0.0400789	NA	NA	NA	NA	109	0.200197
152	moore	31-32-20	Ghana	2	moore_32.1	Temp_1	31 C	75 % RH	Z. m. y	female	18	5	0.4405	0.042271	Left	Forewing	ups	wet	124.659	0.47565	1.5084	0.051187	NA	NA	NA	NA	109	0.226245
367	moore	31-32-21	Ghana	2	moore_32.1	Temp_1	31 C	75 % RH	Z. m. y	female	18	5	0.4102	0.0412787	Left	Forewing	ups	wet	114.488	0.51025	1.5325	0.0310856	NA	NA	NA	NA	109	0.176311
508	moore	31-32-22	Ghana	2	moore_32.1	Temp_1	31 C	75 % RH	Z. m. y	male	NA	NA	NA	NA	Left	Forewing	ups	wet	105.814	0.2495	0.91795	0.0276835	NA	NA	NA	NA	109	0.166384
484	moore	31-33-02	Ghana	2	moore_33.1	Temp_1	31 C	75 % RH	Z. m. y	male	13	6	0.3644	0.0549435	Right	Forewing	uns	wet	88.401	0.1656	0.2994	0.0353038	NA	NA	NA	NA	109	0.187893
534	moore	31-33-03	Ghana	2	moore_33.1	Temp_1	31 C	75 % RH	Z. m. y	male	13	NA	0.3761	0.0555253	Left	Forewing	ups	wet	94.0781	0.2764	0.3513	0.0311061	NA	NA	NA	NA	109	0.176369
252	moore	31-33-06	Ghana	2	moore_33.1	Temp_1	31 C	75 % RH	Z. m. y	female	14	9	0.4636	0.0552823	Left	Forewing	ups	wet	123.234	0.33985	1.114	0.0364465	NA	NA	NA	NA	109	0.19091
468	moore	31-33-07	Ghana	2	moore_33.1	Temp_1	31 C	75 % RH	Z. m. y	male	14	9	0.3737	0.0514493	Right	Forewing	uns	wet	86.8958	0.16395	0.4722	0.0403708	NA	NA	NA	NA	109	0.200925
448	moore	31-33-08	Ghana	2	moore_33.1	Temp_1	31 C	75 % RH	Z. m. y	male	14	9	0.4068	0.0529256	Left	Forewing	ups	wet	110.492	0.2072	0.5147	0.0267385	NA	NA	NA	NA	109	0.163519
347	moore	31-33-11	Ghana	2	moore_33.1	Temp_1	31 C	75 % RH	Z. m. y	female	15	NA	0.4283	0.0502525	Right	Forewing	uns	wet	116.392	0.4658	1.60185	0.0338508	NA	NA	NA	NA	109	0.183986
538	moore	31-33-18	Ghana	2	moore_33.1	Temp_1	31 C	75 % RH	Z. m. y	male	16	7	0.4437	0.0476698	Right	Forewing	uns	wet	116.838	0.22795	0.43335	0.0280302	NA	NA	NA	NA	109	0.167422
343	moore	31-33-19	Ghana	2	moore_33.1	Temp_1	31 C	75 % RH	Z. m. y	female	16	7	0.4665	0.0484727	Right	Forewing	uns	wet	125.104	0.45905	1.71365	0.0330048	NA	NA	NA	NA	109	0.181672
511	moore	31-34-01	Ghana	2	moore_34.1	Temp_1	31 C	75 % RH	Z. m. y	male	14	9	0.4573	0.0550308	Left	Forewing	ups	wet	109.914	0.24305	0.5286	0.0237834	NA	NA	NA	NA	109	0.154219
473	moore	31-34-05	Ghana	2	moore_34.1	Temp_1	31 C	75 % RH	Z. m. y	female	16	7	0.351	0.0440875	Right	Forewing	uns	wet	101.282	0.36025	1.21965	0.0277244	NA	NA	NA	NA	109	0.166506
340	moore	31-34-07	Ghana	2	moore_34.1	Temp_1	31 C	75 % RH	Z. m. y	male	NA	NA	NA	NA	Right	Forewing	uns	wet	98.8782	0.2351	0.22145	0.0434661	NA	NA	NA	NA	109	0.208485
596	moore	31-34-08	Ghana	2	moore_34.1	Temp_1	31 C	75 % RH	Z. m. y	female	NA	NA	NA	NA	Left	Forewing	ups	wet	91.2144	0.3386	1.28695	0.0186776	NA	NA	NA	NA	109	0.136666
499	moore	31-39-01	Ghana	2	moore_39.1	Temp_1	31 C	75 % RH	Z. m. y	male	13	9	0.445	0.0587277	Left	Forewing	ups	wet	102.63	0.20625	0.4737	0.0278619	NA	NA	NA	NA	110	0.166919
233	moore	31-39-04	Ghana	2	moore_39.1	Temp_1	31 C	75 % RH	Z. m. y	male	15	7	0.4375	0.0506098	Right	Forewing	uns	wet	111.389	0.1755	0.39645	0.0397245	NA	NA	NA	NA	110	0.19931
223	moore	31-39-05	Ghana	2	moore_39.1	Temp_1	31 C	75 % RH	Z. m. y	female	16	6	0.4484	0.0478375	Left	Forewing	ups	wet	127.108	0.48305	1.3016	0.0367279	NA	NA	NA	NA	110	0.191645
420	moore	31-39-06	Ghana	2	moore_39.1	Temp_1	31 C	75 % RH	Z. m. y	male	16	6	0.3826	0.0453727	Right	Forewing	uns	wet	98.5462	0.2433	0.5945	0.0365276	NA	NA	NA	NA	110	0.191122
194	moore	31-39-09	Ghana	2	moore_39.1	Temp_1	31 C	75 % RH	Z. m. y	female	16	6	0.3612	0.0445105	Left	Forewing	ups	wet	113.318	0.2815	0.97575	0.0459463	NA	NA	NA	NA	110	0.214351
217	moore	31-39-10	Ghana	2	moore_39.1	Temp_1	31 C	75 % RH	Z. m. y	male	15	7	0.474	0.0519798	Right	Forewing	uns	wet	119.204	0.31645	0.94565	0.0380956	NA	NA	NA	NA	110	0.195181
190	moore	31-40-03	Ghana	2	moore_40.1	Temp_1	31 C	75 % RH	Z. m. y	male	14	8	0.4122	0.0531587	Left	Forewing	ups	wet	110.747	0.10988	0.2213	0.0406417	NA	NA	NA	NA	110	0.201598
393	moore	31-40-04	Ghana	2	moore_40.1	Temp_1	31 C	75 % RH	Z. m. y	female	16	6	0.3893	0.0456361	Left	Forewing	ups	wet	110.614	0.3359	1.08845	0.0291571	NA	NA	NA	NA	110	0.170754
465	moore	31-40-06	Ghana	2	moore_40.1	Temp_1	31 C	75 % RH	Z. m. y	female	17	5	0.5229	0.0473904	Right	Forewing	uns	wet	125.108	0.415	1.5688	0.0275354	NA	NA	NA	NA	110	0.165938
285	moore	31-40-14	Ghana	2	moore_40.1	Temp_1	31 C	75 % RH	Z. m. y	female	17	6	0.3542	0.0416199	Right	Forewing	uns	wet	117.588	0.3909	1.323	0.0380086	NA	NA	NA	NA	110	0.194958
2909	hallow	1_33_55	India	1	hallow_5	Temp_HR	33 C	55 % RH	Z. m. y	female	14	5	0.3554	0.0505954	Right	Forewing	uns	wet	107.475	NA	0.7243	0.043132	NA	NA	NA	NA	NA	0.207682
2919	hallow	10_33_55	India	1	hallow_5	Temp_HR	33 C	55 % RH	Z. m. y	female	15	6	0.3388	0.0464754	Right	Forewing	uns	wet	112.299	NA	2.1348	0.0219254	NA	NA	NA	NA	NA	0.148072
2929	hallow	11_33_55	India	1	hallow_5	Temp_HR	33 C	55 % RH	Z. m. y	male	15	8	0.3022	0.0447377	Right	Forewing	uns	wet	111.089	NA	0.7253	0.0319688	NA	NA	NA	NA	NA	0.178798
2939	hallow	12_33_55	India	1	hallow_5	Temp_HR	33 C	55 % RH	Z. m. y	male	15	8	0.2919	0.0442235	Right	Forewing	uns	wet	NA	NA	NA	NA	NA	NA	NA	NA	NA	NA
2949	hallow	13_33_55	India	1	hallow_5	Temp_HR	33 C	55 % RH	Z. m. y	female	15	7	0.2829	0.0437643	Right	Forewing	uns	wet	114.765	NA	1.6928	0.0207371	NA	NA	NA	NA	NA	0.144004
2959	hallow	14_33_55	India	1	hallow_7	Temp_HR	33 C	55 % RH	Z. m. y	male	15	7	0.268	0.042982	Right	Forewing	uns	wet	NA	NA	NA	NA	NA	NA	NA	NA	NA	NA
2969	hallow	15_33_55	India	1	hallow_7	Temp_HR	33 C	55 % RH	Z. m. y	male	15	6	0.2742	0.043311	Right	Forewing	uns	wet	NA	NA	NA	NA	NA	NA	NA	NA	NA	NA
2977	hallow	16_33_55	India	1	hallow_7	Temp_HR	33 C	55 % RH	Z. m. y	female	15	NA	0.3057	0.0449097	Right	Forewing	uns	NA	NA	NA	NA	NA	NA	NA	NA	NA	NA	NA
2987	hallow	17_33_55	India	1	hallow_7	Temp_HR	33 C	55 % RH	Z. m. y	male	15	7	0.3088	0.045061	Right	Forewing	uns	wet	104.752	NA	1.1347	0.0484727	NA	NA	NA	NA	NA	0.220165
2997	hallow	18_33_55	India	1	hallow_7	Temp_HR	33 C	55 % RH	Z. m. y	male	15	NA	0.2944	0.0443494	Right	Forewing	uns	NA	NA	NA	NA	NA	NA	NA	NA	NA	NA	NA
3007	hallow	19_33_55	India	1	hallow_7	Temp_HR	33 C	55 % RH	Z. m. y	male	18	NA	0.3611	0.0395612	Right	Forewing	uns	NA	NA	NA	NA	NA	NA	NA	NA	NA	NA	NA
3017	hallow	2_33_55	India	1	hallow_5	Temp_HR	33 C	55 % RH	Z. m. y	male	14	5	0.292	0.0473878	Right	Forewing	NA	wet	93.8515	NA	0.6225	0.0337075	NA	NA	NA	NA	NA	0.183596
3027	hallow	20_33_55	India	1	hallow_5	Temp_HR	33 C	55 % RH	Z. m. y	female	19	NA	0.3015	0.0352919	Right	Forewing	NA	NA	NA	NA	NA	NA	NA	NA	NA	NA	NA	NA
3037	hallow	21_33_55	India	1	hallow_7	Temp_HR	33 C	55 % RH	Z. m. y	female	20	NA	0.317	0.0340923	Right	Forewing	NA	NA	NA	NA	NA	NA	NA	NA	NA	NA	NA	NA
3047	hallow	22_33_55	India	1	hallow_13	Temp_HR	33 C	55 % RH	Z. m. y	male	14	NA	0.3053	0.0480966	Right	Forewing	NA	NA	NA	NA	NA	NA	NA	NA	NA	NA	NA	NA
3057	hallow	23_33_55	India	1	hallow_13	Temp_HR	33 C	55 % RH	Z. m. y	male	14	NA	0.2044	0.0420758	Right	Forewing	NA	NA	NA	NA	NA	NA	NA	NA	NA	NA	NA	NA
3065	hallow	24_33_55	India	1	hallow_13	Temp_HR	33 C	55 % RH	Z. m. y	male	14	8	0.2612	0.0456593	Right	Forewing	NA	wet	122.781	NA	1.7048	0.0356015	NA	NA	NA	NA	NA	0.188684
3073	hallow	25_33_55	India	1	hallow_16	Temp_HR	33 C	55 % RH	Z. m. y	male	15	5	0.2811	0.0436713	Right	Forewing	NA	wet	NA	NA	NA	NA	NA	NA	NA	NA	NA	NA
3081	hallow	26_33_55	India	1	hallow_16	Temp_HR	33 C	55 % RH	Z. m. y	female	15	5	0.3071	0.0449782	Right	Forewing	NA	wet	103.22	NA	1.3311	0.0648217	NA	NA	NA	NA	NA	0.254601
3089	hallow	27_33_55	India	1	hallow_13	Temp_HR	33 C	55 % RH	Z. m. y	male	16	7	0.2123	0.0372846	Right	Forewing	NA	wet	NA	NA	NA	NA	NA	NA	NA	NA	NA	NA
3097	hallow	28_33_55	India	1	hallow_13	Temp_HR	33 C	55 % RH	Z. m. y	male	16	7	0.2863	0.0411927	Right	Forewing	NA	wet	99.5662	NA	1.4654	0.058542	NA	NA	NA	NA	NA	0.241954
3103	hallow	29_33_55	India	1	hallow_13	Temp_HR	33 C	55 % RH	Z. m. y	male	16	NA	0.2911	0.0414217	Right	Forewing	NA	NA	NA	NA	NA	NA	NA	NA	NA	NA	NA	NA
3111	hallow	3_33_55	India	1	hallow_5	Temp_HR	33 C	55 % RH	Z. m. y	female	14	7	0.2721	0.0462858	Right	Forewing	NA	wet	90.5405	NA	0.5215	0.0340389	NA	NA	NA	NA	NA	0.184496
3119	hallow	30_33_55	India	1	hallow_13	Temp_HR	33 C	55 % RH	Z. m. y	male	16	8	0.3063	0.0421304	Right	Forewing	NA	wet	86.4973	NA	0.7405	0.0427008	NA	NA	NA	NA	NA	0.206642
3125	hallow	31_33_55	India	1	hallow_13	Temp_HR	33 C	55 % RH	Z. m. y	female	16	8	0.308	0.0422082	Right	Forewing	NA	wet	NA	NA	NA	NA	NA	NA	NA	NA	NA	NA
3131	hallow	32_33_55	India	1	hallow_13	Temp_HR	33 C	55 % RH	Z. m. y	male	16	NA	0.2977	0.0417324	Right	Forewing	NA	NA	NA	NA	NA	NA	NA	NA	NA	NA	NA	NA
3137	hallow	33_33_55	India	1	hallow_13	Temp_HR	33 C	55 % RH	Z. m. y	female	16	NA	0.2417	0.0389319	Right	Forewing	NA	NA	NA	NA	NA	NA	NA	NA	NA	NA	NA	NA
3143	hallow	34_33_55	India	1	hallow_13	Temp_HR	33 C	55 % RH	Z. m. y	female	18	NA	0.2092	0.0329798	Right	Forewing	NA	NA	NA	NA	NA	NA	NA	NA	NA	NA	NA	NA
3149	hallow	35_33_55	India	1	hallow_13	Temp_HR	33 C	55 % RH	Z. m. y	male	18	NA	0.2649	0.0356797	Right	Forewing	NA	NA	NA	NA	NA	NA	NA	NA	NA	NA	NA	NA
3153	hallow	36_33_55	India	1	hallow_16	Temp_HR	33 C	55 % RH	Z. m. y	female	16	NA	0.299	0.041793	Right	Forewing	NA	NA	NA	NA	NA	NA	NA	NA	NA	NA	NA	NA
3157	hallow	37_33_55	India	1	hallow_16	Temp_HR	33 C	55 % RH	Z. m. y	male	16	NA	0.2998	0.0418303	Right	Forewing	NA	NA	NA	NA	NA	NA	NA	NA	NA	NA	NA	NA
3161	hallow	38_33_55	India	1	hallow_16	Temp_HR	33 C	55 % RH	Z. m. y	male	16	NA	0.2549	0.0396281	Right	Forewing	NA	NA	NA	NA	NA	NA	NA	NA	NA	NA	NA	NA
3165	hallow	39_33_55	India	1	hallow_16	Temp_HR	33 C	55 % RH	Z. m. y	female	19	NA	0.2546	0.0333579	Right	Forewing	NA	NA	NA	NA	NA	NA	NA	NA	NA	NA	NA	NA
3173	hallow	4_33_55	India	1	hallow_5	Temp_HR	33 C	55 % RH	Z. m. y	male	15	9	0.2842	0.0438312	Right	Forewing	NA	wet	NA	NA	NA	NA	NA	NA	NA	NA	NA	NA
3177	hallow	40_33_55	India	1	hallow_16	Temp_HR	33 C	55 % RH	Z. m. y	NA	19	NA	0.2429	0.0328389	Right	Forewing	NA	NA	NA	NA	NA	NA	NA	NA	NA	NA	NA	NA
3179	hallow	41_33_55	India	1	hallow_13	Temp_HR	33 C	55 % RH	Z. m. y	male	21	NA	0.2389	0.0295474	Right	Forewing	NA	NA	NA	NA	NA	NA	NA	NA	NA	NA	NA	NA
3181	hallow	42_33_55	India	1	hallow_19	Temp_HR	33 C	55 % RH	Z. m. y	male	18	NA	0.2628	0.0355852	Right	Forewing	NA	NA	NA	NA	NA	NA	NA	NA	NA	NA	NA	NA
3183	hallow	43_33_55	India	1	hallow_19	Temp_HR	33 C	55 % RH	Z. m. y	male	18	NA	0.3413	0.0388245	Right	Forewing	NA	NA	NA	NA	NA	NA	NA	NA	NA	NA	NA	NA
3185	hallow	44_33_55	India	1	hallow_16	Temp_HR	33 C	55 % RH	Z. m. y	female	18	NA	0.2298	0.0340286	Right	Forewing	NA	NA	NA	NA	NA	NA	NA	NA	NA	NA	NA	NA
3187	hallow	45_33_55	India	1	hallow_16	Temp_HR	33 C	55 % RH	Z. m. y	female	18	NA	0.1982	0.0323913	Right	Forewing	NA	NA	NA	NA	NA	NA	NA	NA	NA	NA	NA	NA
3189	hallow	46_33_55	India	1	hallow_16	Temp_HR	33 C	55 % RH	Z. m. y	male	18	NA	0.2256	0.03382	Right	Forewing	NA	NA	NA	NA	NA	NA	NA	NA	NA	NA	NA	NA
3191	hallow	47_33_55	India	1	hallow_16	Temp_HR	33 C	55 % RH	Z. m. y	male	18	7	0.295	0.0369829	Right	Forewing	NA	wet	NA	NA	NA	NA	NA	NA	NA	NA	NA	NA
3193	hallow	48_33_55	India	1	hallow_16	Temp_HR	33 C	55 % RH	Z. m. y	female	18	NA	0.2152	0.0332921	Right	Forewing	NA	NA	NA	NA	NA	NA	NA	NA	NA	NA	NA	NA
3195	hallow	49_33_55	India	1	hallow_16	Temp_HR	33 C	55 % RH	Z. m. y	male	18	NA	0.2726	0.0360221	Right	Forewing	NA	NA	NA	NA	NA	NA	NA	NA	NA	NA	NA	NA
3201	hallow	5_33_55	India	1	hallow_5	Temp_HR	33 C	55 % RH	Z. m. y	female	15	7	0.2709	0.0431365	Right	Forewing	NA	wet	101.916	NA	1.2774	0.0473755	NA	NA	NA	NA	NA	0.217659
3205	hallow	50_33_55	India	1	hallow_19	Temp_HR	33 C	55 % RH	Z. m. y	male	17	NA	0.2772	0.0383544	Right	Forewing	NA	NA	NA	NA	NA	NA	NA	NA	NA	NA	NA	NA
3207	hallow	51_33_55	India	1	hallow_19	Temp_HR	33 C	55 % RH	Z. m. y	male	17	NA	0.267	0.0378781	Right	Forewing	NA	NA	NA	NA	NA	NA	NA	NA	NA	NA	NA	NA
3209	hallow	52_33_55	India	1	hallow_13	Temp_HR	33 C	55 % RH	Z. m. y	male	20	NA	0.2611	0.0319575	Right	Forewing	NA	NA	NA	NA	NA	NA	NA	NA	NA	NA	NA	NA
3211	hallow	53_33_55	India	1	hallow_13	Temp_HR	33 C	55 % RH	Z. m. y	male	20	NA	0.2726	0.0324199	Right	Forewing	NA	NA	NA	NA	NA	NA	NA	NA	NA	NA	NA	NA
3213	hallow	54_33_55	India	1	hallow_16	Temp_HR	33 C	55 % RH	Z. m. y	female	18	NA	0.2305	0.0340631	Right	Forewing	NA	NA	NA	NA	NA	NA	NA	NA	NA	NA	NA	NA
3215	hallow	55_33_55	India	1	hallow_13	Temp_HR	33 C	55 % RH	Z. m. y	male	22	7	0.3406	0.0317438	Right	Forewing	NA	wet	NA	NA	NA	NA	NA	NA	NA	NA	NA	NA
3217	hallow	56_33_55	India	1	hallow_13	Temp_HR	33 C	55 % RH	Z. m. y	male	22	7	0.199	0.0265376	Right	Forewing	NA	wet	NA	NA	NA	NA	NA	NA	NA	NA	NA	NA
3219	hallow	57_33_55	India	1	hallow_19	Temp_HR	33 C	55 % RH	Z. m. y	female	19	7	0.2616	0.0336609	Right	Forewing	NA	wet	NA	NA	NA	NA	NA	NA	NA	NA	NA	NA
3221	hallow	58_33_55	India	1	hallow_19	Temp_HR	33 C	55 % RH	Z. m. y	male	19	NA	0.234	0.0324328	Right	Forewing	NA	NA	NA	NA	NA	NA	NA	NA	NA	NA	NA	NA
3223	hallow	59_33_55	India	1	hallow_19	Temp_HR	33 C	55 % RH	Z. m. y	male	19	7	0.2694	0.0339922	Right	Forewing	NA	wet	NA	NA	NA	NA	NA	NA	NA	NA	NA	NA
3231	hallow	6_33_55	India	1	hallow_5	Temp_HR	33 C	55 % RH	Z. m. y	male	15	7	0.2982	0.0445394	Right	Forewing	NA	wet	102.223	NA	1.4688	0.0230066	NA	NA	NA	NA	NA	0.151679
3235	hallow	60_33_55	India	1	hallow_19	Temp_HR	33 C	55 % RH	Z. m. y	NA	19	7	0.2652	0.0338146	Right	Forewing	NA	wet	NA	NA	NA	NA	NA	NA	NA	NA	NA	NA
3237	hallow	61_33_55	India	1	hallow_19	Temp_HR	33 C	55 % RH	Z. m. y	male	19	NA	0.2321	0.0323448	Right	Forewing	NA	NA	NA	NA	NA	NA	NA	NA	NA	NA	NA	NA
3239	hallow	62_33_55	India	1	hallow_19	Temp_HR	33 C	55 % RH	Z. m. y	male	19	7	0.3044	0.0354047	Right	Forewing	NA	wet	93.1081	NA	0.3905	0.037217	NA	NA	NA	NA	NA	0.192917
3247	hallow	7_33_55	India	1	hallow_5	Temp_HR	33 C	55 % RH	Z. m. y	female	15	6	0.3177	0.0454898	Right	Forewing	NA	wet	109.285	NA	1.6144	0.0217385	NA	NA	NA	NA	NA	0.14744
3255	hallow	8_33_55	India	1	hallow_5	Temp_HR	33 C	55 % RH	Z. m. y	male	15	7	0.3376	0.0464205	Right	Forewing	NA	wet	NA	NA	NA	NA	NA	NA	NA	NA	NA	NA
3265	hallow	9_33_55	India	1	hallow_5	Temp_HR	33 C	55 % RH	Z. m. y	male	15	7	0.2633	0.0427293	Right	Forewing	NA	wet	101.402	NA	0.9339	0.0245962	NA	NA	NA	NA	NA	0.156832
2911	hallow	1_33_85	India	1	hallow_6	Temp_HR	33 C	85 % RH	Z. m. y	female	15	6	0.3665	0.047709	Right	Forewing	uns	wet	119.095	NA	1.2232	0.0329637	NA	NA	NA	NA	NA	0.181559
2921	hallow	10_33_85	India	1	hallow_8	Temp_HR	33 C	85 % RH	Z. m. y	female	14	6	0.3367	0.049692	Right	Forewing	uns	wet	NA	NA	NA	NA	NA	NA	NA	NA	NA	NA
2931	hallow	11_33_85	India	1	hallow_8	Temp_HR	33 C	85 % RH	Z. m. y	female	14	6	0.3349	0.0496033	Right	Forewing	uns	wet	NA	NA	NA	NA	NA	NA	NA	NA	NA	NA
2941	hallow	12_33_85	India	1	hallow_8	Temp_HR	33 C	85 % RH	Z. m. y	male	14	7	0.3541	0.0505336	Right	Forewing	uns	wet	NA	NA	NA	NA	NA	NA	NA	NA	NA	NA
2951	hallow	13_33_85	India	1	hallow_6	Temp_HR	33 C	85 % RH	Z. m. y	male	19	7	0.3905	0.0384698	Right	Forewing	uns	wet	NA	NA	NA	NA	NA	NA	NA	NA	NA	NA
2961	hallow	14_33_85	India	1	hallow_6	Temp_HR	33 C	85 % RH	Z. m. y	male	16	8	0.2693	0.0403607	Right	Forewing	uns	wet	NA	NA	NA	NA	NA	NA	NA	NA	NA	NA
2971	hallow	15_33_85	India	1	hallow_6	Temp_HR	33 C	85 % RH	Z. m. y	female	16	7	0.4637	0.0483755	Right	Forewing	uns	wet	NA	NA	NA	NA	NA	NA	NA	NA	NA	NA
2979	hallow	16_33_85	India	1	hallow_8	Temp_HR	33 C	85 % RH	Z. m. y	female	16	NA	0.3621	0.0445475	Right	Forewing	uns	NA	NA	NA	NA	NA	NA	NA	NA	NA	NA	NA
2989	hallow	17_33_85	India	1	hallow_15	Temp_HR	33 C	85 % RH	Z. m. y	NA	10	7	NA	NA	Right	Forewing	uns	wet	NA	NA	NA	NA	NA	NA	NA	NA	NA	NA
2999	hallow	18_33_85	India	1	hallow_8	Temp_HR	33 C	85 % RH	Z. m. y	female	21	7	0.3463	0.0334399	Right	Forewing	uns	wet	NA	NA	NA	NA	NA	NA	NA	NA	NA	NA
3009	hallow	19_33_85	India	1	hallow_8	Temp_HR	33 C	85 % RH	Z. m. y	female	21	NA	0.2078	0.0282052	Right	Forewing	uns	NA	NA	NA	NA	NA	NA	NA	NA	NA	NA	NA
3019	hallow	2_33_85	India	1	hallow_6	Temp_HR	33 C	85 % RH	Z. m. y	NA	15	8	0.3461	0.0468068	Right	Forewing	NA	wet	102.138	NA	1.2201	0.0370059	NA	NA	NA	NA	NA	0.192369
3029	hallow	20_33_85	India	1	hallow_8	Temp_HR	33 C	85 % RH	Z. m. y	NA	21	8	NA	NA	Right	Forewing	NA	wet	NA	NA	NA	NA	NA	NA	NA	NA	NA	NA
3039	hallow	21_33_85	India	1	hallow_9	Temp_HR	33 C	85 % RH	Z. m. y	NA	22	NA	0.1562	0.0244796	Right	Forewing	NA	NA	NA	NA	NA	NA	NA	NA	NA	NA	NA	NA
3049	hallow	22_33_85	India	1	hallow_15	Temp_HR	33 C	85 % RH	Z. m. y	male	15	NA	0.2498	0.0419862	Right	Forewing	NA	NA	NA	NA	NA	NA	NA	NA	NA	NA	NA	NA
3059	hallow	23_33_85	India	1	hallow_15	Temp_HR	33 C	85 % RH	Z. m. y	male	15	NA	0.266	0.0428749	Right	Forewing	NA	NA	NA	NA	NA	NA	NA	NA	NA	NA	NA	NA
3067	hallow	24_33_85	India	1	hallow_9	Temp_HR	33 C	85 % RH	Z. m. y	female	26	7	0.3823	0.0279144	Right	Forewing	NA	wet	NA	NA	NA	NA	NA	NA	NA	NA	NA	NA
3075	hallow	25_33_85	India	1	hallow_15	Temp_HR	33 C	85 % RH	Z. m. y	NA	19	NA	0.2955	0.0350563	Right	Forewing	NA	NA	NA	NA	NA	NA	NA	NA	NA	NA	NA	NA
3083	hallow	26_33_85	India	1	hallow_15	Temp_HR	33 C	85 % RH	Z. m. y	NA	19	7	0.2843	0.0346076	Right	Forewing	NA	wet	NA	NA	NA	NA	NA	NA	NA	NA	NA	NA
3091	hallow	27_33_85	India	1	hallow_15	Temp_HR	33 C	85 % RH	Z. m. y	NA	19	NA	0.2557	0.0334059	Right	Forewing	NA	NA	NA	NA	NA	NA	NA	NA	NA	NA	NA	NA
3113	hallow	3_33_85	India	1	hallow_6	Temp_HR	33 C	85 % RH	Z. m. y	female	16	7	0.3212	0.0428028	Right	Forewing	NA	wet	109.418	NA	1.5253	0.0268321	NA	NA	NA	NA	NA	0.163805
3175	hallow	4_33_85	India	1	hallow_6	Temp_HR	33 C	85 % RH	Z. m. y	male	16	8	0.4099	0.0464272	Right	Forewing	NA	wet	109.625	NA	0.6598	0.0561279	NA	NA	NA	NA	NA	0.236913
3203	hallow	5_33_85	India	1	hallow_6	Temp_HR	33 C	85 % RH	Z. m. y	male	16	7	0.3949	0.0458538	Right	Forewing	NA	wet	124.599	NA	0.9883	0.0398197	NA	NA	NA	NA	NA	0.199549
3233	hallow	6_33_85	India	1	hallow_6	Temp_HR	33 C	85 % RH	Z. m. y	female	16	8	0.4114	0.0464838	Right	Forewing	NA	dry	NA	NA	NA	NA	NA	NA	NA	NA	NA	NA
3249	hallow	7_33_85	India	1	hallow_8	Temp_HR	33 C	85 % RH	Z. m. y	male	14	7	0.2931	0.0474472	Right	Forewing	NA	wet	82.8111	NA	0.9191	0.0351777	NA	NA	NA	NA	NA	0.187557
3257	hallow	8_33_85	India	1	hallow_8	Temp_HR	33 C	85 % RH	Z. m. y	female	14	7	0.3377	0.0497411	Right	Forewing	NA	wet	NA	NA	NA	NA	NA	NA	NA	NA	NA	NA
3267	hallow	9_33_85	India	1	hallow_8	Temp_HR	33 C	85 % RH	Z. m. y	female	14	7	0.3025	0.0479491	Right	Forewing	NA	wet	NA	NA	NA	NA	NA	NA	NA	NA	NA	NA

## Sheet: ReadMe
Column name	meaning
dat_id	unique data ID number
Author	person who collected the observation (Elizbeth Moore, Sridhar Halali, or Freerk Molleman)
Ind	Name of the individual butterfly
pop	Population of origin
gen	Generation in captivity
sleeve	name of the sleeve
expt	name of the experiment
Temp	Rearing temperature
Humidity	Rearing Relative Humidity
plant	Host plant species on which the individual was reared
sex	whether it was a male or a female
larv_time	time between egg-hatching and pupation
pup_time	time between pupation and adult eclosion
pup_mss	mass of the pupa (grams)
grwth_rate	growth rate calculated as (pupal mass)1/3 / (larval development time)
quirality	left or right wing
wingtype	front- or hind-wing
Side	upper (dorsal) or under (ventral) side of the wing
phenotype	Categorized as dry or wet season phenotype
WA	wing area proxie
TAsm	small wing tip area (not used in analyses)
TAlg	large wing tip area (used in analyses)
ES	Eyespot area
cat_eyesp	categorized eyespot size (for those without images)
mn_cat_eyesp	mean categorized eyespot
cat_wingshape	categorized wing shape
cat_irror	categorized wing background coloration (wet season forms are strongly irrorated, dry more evenly colored)
hatched_date	date of egg hatching
sqrtES	square root of relative eyespot size
