# Supplementary material for: Larval growth rate is not a major determinant of adult wing shape and eyespot size in the seasonally polyphenic butterfly Melanitis leda
Source: PeerJ journal article supplement (doi:10.7717/peerj.18295), 2024-10-16
Supplement: MledaCleanR.xlsx [file MledaCleanR.xlsx]

## Sheet: MledaCleanR
	dat_id	Author	Ind	pop	gen	sleeve	expt	Temp	Humidity	plant	sex	larv_time	pup_time	pup_mss	grwth_rate	quirality	wingtype	Side	phenotype	WA	TAsm	TAlg	ES	cat_eyesp	mn_cat_eyesp	cat_wingshape	cat_irror	hatched_date	sqrtES	ESsizeC	Form	relTAlg	sqrtRelTAlg
1	2903	hallow	1_18_85	India	1	hallow_1	Temp_HR	18 C	85 % RH	Z. m. y	male	31	24	0.4124	0.0240111	Right	Forewing	uns	dry	NA	NA	NA	NA	NA	NA	NA	NA	NA	NA	NA	dry	NA	NA
2	2913	hallow	10_18_85	India	1	hallow_2	Temp_HR	18 C	85 % RH	Z. m. y	male	42	NA	0.4698	0.0185092	Right	Forewing	uns	dry	NA	NA	NA	NA	NA	NA	NA	NA	NA	NA	NA	dry	NA	NA
3	2923	hallow	11_18_85	India	1	hallow_2	Temp_HR	18 C	85 % RH	Z. m. y	male	42	28	0.3613	0.016958	Right	Forewing	uns	dry	137.044	NA	6.344	0.00336899	NA	NA	NA	NA	NA	0.058043	small	dry	0.0425884	0.206369
4	2933	hallow	12_18_85	India	1	hallow_14	Temp_HR	18 C	85 % RH	Z. m. y	male	40	17	0.4228	0.0187637	Right	Forewing	uns	dry	144.573	NA	5.1868	0.00842549	NA	NA	NA	NA	NA	0.0917905	small	dry	0.0320378	0.178991
5	2943	hallow	13_18_85	India	1	hallow_14	Temp_HR	18 C	85 % RH	Z. m. y	female	40	17	0.4482	0.0191322	Right	Forewing	uns	dry	136.977	NA	5.7215	0.004949	NA	NA	NA	NA	NA	0.0703491	small	dry	0.0350227	0.187144
6	2953	hallow	14_18_85	India	1	hallow_14	Temp_HR	18 C	85 % RH	Z. m. y	male	41	16	0.4708	0.0189741	Right	Forewing	uns	dry	147.143	NA	4.2014	0.00745536	NA	NA	NA	NA	NA	0.0863444	small	dry	0.0234011	0.152974
7	2963	hallow	15_18_85	India	1	hallow_14	Temp_HR	18 C	85 % RH	Z. m. y	female	43	17	0.3669	0.0166487	Right	Forewing	uns	dry	NA	NA	NA	NA	NA	NA	NA	NA	NA	NA	NA	dry	NA	NA
8	2973	hallow	16_18_85	India	1	hallow_14	Temp_HR	18 C	85 % RH	Z. m. y	male	44	13	0.4309	0.0171661	Right	Forewing	uns	int	134.075	NA	2.4098	0.0142204	NA	NA	NA	NA	NA	0.119249	small	dry	0.0181034	0.134549
9	2981	hallow	17_18_85	India	1	hallow_14	Temp_HR	18 C	85 % RH	Z. m. y	female	44	17	0.4513	0.0174329	Right	Forewing	uns	dry	148.948	NA	6.0112	0.00284462	NA	NA	NA	NA	NA	0.053335	small	dry	0.0387326	0.196806
10	2991	hallow	18_18_85	India	1	hallow_19	Temp_HR	18 C	85 % RH	Z. m. y	male	41	16	0.4661	0.0189108	Right	Forewing	uns	dry	154.144	NA	4.8073	0.00253399	NA	NA	NA	NA	NA	0.0503388	small	dry	0.0286055	0.169132
11	3001	hallow	19_18_85	India	1	hallow_19	Temp_HR	18 C	85 % RH	Z. m. y	male	42	15	0.4078	0.0176563	Right	Forewing	uns	dry	127.823	NA	5.554	0.00397738	NA	NA	NA	NA	NA	0.0630665	small	dry	0.0426378	0.206489
12	3011	hallow	2_18_85	India	1	hallow_1	Temp_HR	18 C	85 % RH	Z. m. y	male	31	20	0.3929	0.0236265	Right	Forewing	NA	wet	130.731	NA	3.7655	0.00799201	NA	NA	NA	NA	NA	0.089398	small	dry	0.026005	0.161261
13	3021	hallow	20_18_85	India	1	hallow_19	Temp_HR	18 C	85 % RH	Z. m. y	female	44	NA	0.4713	0.0176867	Right	Forewing	NA	dry	138.594	NA	5.4924	0.00227354	NA	NA	NA	NA	NA	0.0476817	small	dry	0.0381445	0.195306
14	3031	hallow	21_18_85	India	1	hallow_19	Temp_HR	18 C	85 % RH	Z. m. y	female	44	14	0.4725	0.0177017	Right	Forewing	NA	dry	133.771	NA	6.1254	0.00612765	NA	NA	NA	NA	NA	0.0782793	small	dry	0.040132	0.20033
15	3041	hallow	22_18_85	India	1	hallow_19	Temp_HR	18 C	85 % RH	Z. m. y	female	44	NA	0.4274	0.0171195	Right	Forewing	NA	NA	NA	NA	NA	NA	NA	NA	NA	NA	NA	NA	NA	NA	NA	NA
16	3051	hallow	23_18_85	India	1	hallow_14	Temp_HR	18 C	85 % RH	Z. m. y	female	49	12	0.4185	0.0152652	Right	Forewing	NA	dry	NA	NA	NA	NA	NA	NA	NA	NA	NA	NA	NA	dry	NA	NA
17	3105	hallow	3_18_85	India	1	hallow_1	Temp_HR	18 C	85 % RH	Z. m. y	female	37	18	0.4504	0.0207172	Right	Forewing	NA	dry	149.574	NA	6.1207	0.00280932	NA	NA	NA	NA	NA	0.053003	small	dry	0.0433565	0.208222
18	3167	hallow	4_18_85	India	1	hallow_1	Temp_HR	18 C	85 % RH	Z. m. y	female	37	19	0.4962	0.0213969	Right	Forewing	NA	dry	163.252	NA	6.1367	0	NA	NA	NA	NA	NA	0	small	dry	0.0464056	0.21542
19	3225	hallow	6_18_85	India	1	hallow_2	Temp_HR	18 C	85 % RH	Z. m. y	female	37	18	0.4692	0.0210015	Right	Forewing	NA	dry	159.659	NA	7.3316	0.00479897	NA	NA	NA	NA	NA	0.0692746	small	dry	0.0509798	0.225787
20	3241	hallow	7_18_85	India	1	hallow_2	Temp_HR	18 C	85 % RH	Z. m. y	female	37	19	0.4595	0.0208558	Right	Forewing	NA	dry	152.361	NA	5.2039	0.00714157	NA	NA	NA	NA	NA	0.0845078	small	dry	0.0325738	0.180482
21	3251	hallow	8_18_85	India	1	hallow_2	Temp_HR	18 C	85 % RH	Z. m. y	male	42	17	0.407	0.0176448	Right	Forewing	NA	dry	163.171	NA	5.5081	0.00385178	NA	NA	NA	NA	NA	0.0620627	small	dry	0.0405148	0.201283
22	3259	hallow	9_18_85	India	1	hallow_2	Temp_HR	18 C	85 % RH	Z. m. y	female	42	18	0.4778	0.0186137	Right	Forewing	NA	dry	NA	NA	NA	NA	NA	NA	NA	NA	NA	NA	NA	dry	NA	NA
23	637	moore	19-01-01	Ghana	2	Temp_1.1	Temp_1	19 C	75 % RH	Z. m. y	male	38	18	0.5653	0.0217592	Right	Forewing	uns	dry	146.318	0.9654	4.16505	0.00452201	NA	NA	NA	NA	100	0.0672459	small	dry	0.0279504	0.167184
24	630	moore	19-01-02	Ghana	2	Temp_1.1	Temp_1	19 C	75 % RH	Z. m. y	female	39	17	0.5075	0.0204525	Right	Forewing	uns	dry	148.961	1.35145	5.6408	0.00571408	NA	NA	NA	NA	100	0.0755915	small	dry	0.0364644	0.190957
25	812	moore	19-01-03	Ghana	2	Temp_1.1	Temp_1	19 C	75 % RH	Z. m. y	male	43	17	0.672	0.0203699	Right	Forewing	uns	dry	163.365	1.04645	3.90835	0.00319141	NA	NA	NA	NA	100	0.0564926	small	dry	0.0293823	0.171413
26	872	moore	19-02-02	Ghana	2	Temp_2.1	Temp_1	19 C	75 % RH	Z. m. y	male	37	16	0.4507	0.0207218	Left	Forewing	ups	dry	128.258	0.78985	3.1803	0.00394668	NA	NA	NA	NA	99	0.0628226	small	dry	0.0233571	0.15283
27	671	moore	19-02-03	Ghana	2	Temp_2.1	Temp_1	19 C	75 % RH	Z. m. y	female	37	17	0.5577	0.0222467	Right	Forewing	uns	dry	155.197	1.6251	6.0863	0.00453663	NA	NA	NA	NA	99	0.0673545	small	dry	0.0413264	0.203289
28	936	moore	19-02-04	Ghana	2	Temp_2.1	Temp_1	19 C	75 % RH	Z. m. y	female	38	17	0.5142	0.0210827	Left	Forewing	ups	dry	130.26	1.0156	4.35975	0.00315556	NA	NA	NA	NA	99	0.0561743	small	dry	0.028669	0.169319
29	806	moore	19-02-05	Ghana	2	Temp_2.1	Temp_1	19 C	75 % RH	Z. m. y	male	40	17	0.5069	0.0199334	Right	Forewing	uns	dry	143.989	1.18135	4.2212	0.00221459	NA	NA	NA	NA	99	0.0470594	small	dry	0.0300177	0.173256
30	869	moore	19-02-07	Ghana	2	Temp_2.1	Temp_1	19 C	75 % RH	Z. m. y	male	39	17	0.4584	0.0197705	Right	Forewing	uns	dry	123.132	0.99535	3.78335	0.00319517	NA	NA	NA	NA	99	0.0565258	small	dry	0.0271247	0.164696
31	861	moore	19-02-08	Ghana	2	Temp_2.1	Temp_1	19 C	75 % RH	Z. m. y	female	40	16	0.4383	0.0189902	Right	Forewing	uns	dry	141.172	1.31595	4.8829	0.00313697	NA	NA	NA	NA	99	0.0560087	small	dry	0.0323867	0.179963
32	933	moore	19-02-09	Ghana	2	Temp_2.1	Temp_1	19 C	75 % RH	Z. m. y	male	40	17	0.5105	0.0199805	Left	Forewing	ups	dry	143.814	1.0978	4.23565	0.00327268	NA	NA	NA	NA	99	0.0572073	small	dry	0.0272592	0.165104
33	885	moore	19-02-10	Ghana	2	Temp_2.1	Temp_1	19 C	75 % RH	Z. m. y	male	40	17	0.5046	0.0199032	Right	Forewing	uns	dry	135.953	0.9965	3.70585	0.00319501	NA	NA	NA	NA	99	0.0565245	small	dry	0.0251449	0.158571
34	893	moore	19-02-11	Ghana	2	Temp_2.1	Temp_1	19 C	75 % RH	Z. m. y	female	41	16	0.5287	0.0197221	Right	Forewing	uns	dry	149.016	1.22015	5.2644	0.00261068	NA	NA	NA	NA	99	0.0510948	small	dry	0.0345486	0.185873
35	930	moore	19-02-12	Ghana	2	Temp_2.1	Temp_1	19 C	75 % RH	Z. m. y	female	41	16	0.423	0.0183089	Right	Forewing	uns	dry	133.017	1.1676	4.66565	0.00260778	NA	NA	NA	NA	99	0.0510664	small	dry	0.0420347	0.205024
36	815	moore	19-02-14	Ghana	2	Temp_2.1	Temp_1	19 C	75 % RH	Z. m. y	male	41	18	0.5054	0.019428	Right	Forewing	uns	dry	147.274	0.9609	3.76015	0.00351722	NA	NA	NA	NA	99	0.0593061	small	dry	0.0292378	0.170991
37	975	moore	19-02-15	Ghana	2	Temp_2.1	Temp_1	19 C	75 % RH	Z. m. y	female	41	16	0.43	0.0184094	Right	Forewing	uns	dry	140.624	1.1715	4.8001	0.00187157	NA	NA	NA	NA	99	0.0432617	small	dry	0.0334517	0.182898
38	883	moore	19-02-16	Ghana	2	Temp_2.1	Temp_1	19 C	75 % RH	Z. m. y	male	42	17	0.5101	0.019024	Left	Forewing	ups	dry	150.769	1.37365	5.06965	0.00282406	NA	NA	NA	NA	99	0.0531418	small	dry	0.0352947	0.187869
39	836	moore	19-02-17	Ghana	2	Temp_2.1	Temp_1	19 C	75 % RH	Z. m. y	female	42	17	0.4575	0.0183463	Right	Forewing	uns	dry	147.38	1.3991	5.42245	0.00311446	NA	NA	NA	NA	99	0.0558074	small	dry	0.0413603	0.203372
40	942	moore	19-02-18	Ghana	2	Temp_2.1	Temp_1	19 C	75 % RH	Z. m. y	female	42	17	0.3897	0.0173911	Left	Forewing	ups	dry	110.995	1.17005	4.40905	0.00261728	NA	NA	NA	NA	99	0.0511594	small	dry	0.0322303	0.179528
41	629	moore	19-02-19	Ghana	2	Temp_2.1	Temp_1	19 C	75 % RH	Z. m. y	female	43	16	0.4463	0.0177722	Right	Forewing	uns	dry	143.494	1.76255	6.5033	0.00549523	NA	NA	NA	NA	99	0.0741298	small	dry	0.0475904	0.218152
42	747	moore	19-02-21	Ghana	2	Temp_2.1	Temp_1	19 C	75 % RH	Z. m. y	female	46	16	0.4355	0.016478	Right	Forewing	uns	dry	131.103	1.1693	4.8191	0.00426789	NA	NA	NA	NA	99	0.0653291	small	dry	0.032397	0.179992
43	977	moore	19-02-23	Ghana	2	Temp_2.1	Temp_1	19 C	75 % RH	Z. m. y	female	48	18	0.4483	0.0159447	Left	Forewing	ups	dry	136.652	1.48235	5.8295	0.00217616	NA	NA	NA	NA	99	0.0466493	small	dry	0.0368728	0.192023
44	898	moore	19-08-01	Ghana	2	moore_8.1	Temp_1	19 C	75 % RH	Z. m. y	male	39	16	0.5891	0.0214947	Left	Forewing	ups	dry	158.097	1.23895	4.495	0.00314688	NA	NA	NA	NA	103	0.0560971	small	dry	0.0263539	0.162339
45	677	moore	19-08-02	Ghana	2	moore_8.1	Temp_1	19 C	75 % RH	Z. m. y	female	40	15	0.5062	0.0199242	Left	Forewing	ups	dry	154.281	1.1433	4.497	0.004968	NA	NA	NA	NA	103	0.070484	small	dry	0.0291482	0.170728
46	724	moore	19-08-03	Ghana	2	moore_8.1	Temp_1	19 C	75 % RH	Z. m. y	male	42	16	0.531	0.0192804	Left	Forewing	ups	dry	148.919	1.3275	4.8595	0.00415026	NA	NA	NA	NA	103	0.0644225	small	dry	0.0304831	0.174594
47	906	moore	19-08-04	Ghana	2	moore_8.1	Temp_1	19 C	75 % RH	Z. m. y	male	43	15	0.5441	0.0189856	Right	Forewing	uns	dry	141.387	1.0815	4.1322	0.00266901	NA	NA	NA	NA	103	0.0516625	small	dry	0.027748	0.166577
48	944	moore	19-08-05	Ghana	2	moore_8.1	Temp_1	19 C	75 % RH	Z. m. y	male	43	16	0.5578	0.0191436	Left	Forewing	ups	dry	164.44	1.29285	4.963	0.00289019	NA	NA	NA	NA	103	0.0537605	small	dry	0.0302381	0.173891
49	632	moore	19-08-06	Ghana	2	moore_8.1	Temp_1	19 C	75 % RH	Z. m. y	female	43	16	0.5151	0.0186421	Right	Forewing	uns	dry	144.604	1.4224	6.5346	0.00653339	NA	NA	NA	NA	103	0.0808294	small	dry	0.0462177	0.214983
50	789	moore	19-08-07	Ghana	2	moore_8.1	Temp_1	19 C	75 % RH	Z. m. y	male	44	17	0.6173	0.0193514	Left	Forewing	ups	dry	170.79	1.3452	5.2034	0.00313227	NA	NA	NA	NA	103	0.0559667	small	dry	0.0348959	0.186804
51	817	moore	19-08-08	Ghana	2	moore_8.1	Temp_1	19 C	75 % RH	Z. m. y	male	46	17	0.5177	0.0174556	Right	Forewing	uns	dry	137.628	1.18255	4.5952	0.00436058	NA	NA	NA	NA	103	0.0660347	small	dry	0.0279445	0.167166
52	743	moore	19-08-09	Ghana	2	moore_8.1	Temp_1	19 C	75 % RH	Z. m. y	male	46	17	0.5716	0.0180415	Right	Forewing	uns	dry	150.47	1.1521	4.24785	0.00213939	NA	NA	NA	NA	103	0.0462536	small	dry	0.0251514	0.158592
53	697	moore	19-08-11	Ghana	2	moore_8.1	Temp_1	19 C	75 % RH	Z. m. y	female	49	17	0.389	0.0148977	Right	Forewing	uns	dry	123.596	1.1844	5.00395	0.0060466	NA	NA	NA	NA	103	0.0777599	small	dry	0.0346046	0.186023
54	888	moore	19-08-12	Ghana	2	moore_8.1	Temp_1	19 C	75 % RH	Z. m. y	female	49	17	0.5517	0.0167381	Right	Forewing	uns	dry	177.474	1.7443	7.0844	0.00237523	NA	NA	NA	NA	103	0.0487363	small	dry	0.0450234	0.212187
55	847	moore	19-09-01	Ghana	2	moore_9.1	Temp_1	19 C	75 % RH	Z. m. y	female	38	17	0.5979	0.0221697	Left	Forewing	ups	dry	158.811	1.0126	4.5046	0.0033065	NA	NA	NA	NA	103	0.0575022	small	dry	0.026375	0.162404
56	921	moore	19-09-02	Ghana	2	moore_9.1	Temp_1	19 C	75 % RH	Z. m. y	male	38	17	0.517	0.0211209	Right	Forewing	uns	dry	145.599	0.9542	3.1077	0.00269133	NA	NA	NA	NA	103	0.0518781	small	dry	0.017818	0.133484
57	979	moore	19-09-03	Ghana	2	moore_9.1	Temp_1	19 C	75 % RH	Z. m. y	male	39	16	0.4954	0.0202887	Left	Forewing	ups	dry	137.669	1.16545	4.34085	0.00141863	NA	NA	NA	NA	103	0.0376647	small	dry	0.0315406	0.177597
58	811	moore	19-09-04	Ghana	2	moore_9.1	Temp_1	19 C	75 % RH	Z. m. y	male	39	16	0.6084	0.0217269	Right	Forewing	uns	dry	150.988	1.26625	4.4731	0.00259637	NA	NA	NA	NA	103	0.0509546	small	dry	0.0283403	0.168346
59	890	moore	19-09-05	Ghana	2	moore_9.1	Temp_1	19 C	75 % RH	Z. m. y	male	38	17	0.4932	0.0207917	Left	Forewing	ups	dry	137.499	1.0377	3.68725	0.00199903	NA	NA	NA	NA	103	0.0447105	small	dry	0.0245049	0.15654
60	877	moore	19-09-06	Ghana	2	moore_9.1	Temp_1	19 C	75 % RH	Z. m. y	male	40	18	0.6127	0.0212336	Right	Forewing	uns	dry	163.001	1.0816	3.59845	0.00223764	NA	NA	NA	NA	103	0.0473037	small	dry	0.0210291	0.145014
61	963	moore	19-09-07	Ghana	2	moore_9.1	Temp_1	19 C	75 % RH	Z. m. y	female	42	16	0.5101	0.019024	Left	Forewing	ups	dry	148.811	1.3735	5.6564	0.0022122	NA	NA	NA	NA	103	0.047034	small	dry	0.0457653	0.213928
62	705	moore	19-09-08	Ghana	2	moore_9.1	Temp_1	19 C	75 % RH	Z. m. y	female	43	16	0.4094	0.0172682	Right	Forewing	uns	dry	97.9472	0.8113	3.4239	0.00470487	NA	NA	NA	NA	103	0.0685921	small	dry	0.0268739	0.163933
63	866	moore	19-19-01	Ghana	2	Temp_19.1	Temp_1	19 C	75 % RH	Z. m. y	male	41	17	0.5406	0.0198689	Left	Forewing	ups	dry	146.492	1.14745	4.2304	0.00366906	NA	NA	NA	NA	106	0.0605728	small	dry	0.0238367	0.154391
64	826	moore	19-19-02	Ghana	2	Temp_19.1	Temp_1	19 C	75 % RH	Z. m. y	male	41	17	0.5286	0.0197208	Left	Forewing	ups	dry	152.665	0.99255	3.90395	0.00372331	NA	NA	NA	NA	106	0.0610189	small	dry	0.0212607	0.14581
65	799	moore	19-19-03	Ghana	2	Temp_19.1	Temp_1	19 C	75 % RH	Z. m. y	female	42	16	0.4428	0.0181476	Left	Forewing	ups	dry	157.08	1.419	5.5174	0.00386112	NA	NA	NA	NA	106	0.062138	small	dry	0.034742	0.186392
66	900	moore	19-19-04	Ghana	2	Temp_19.1	Temp_1	19 C	75 % RH	Z. m. y	female	42	16	0.6346	0.0204606	Right	Forewing	uns	dry	164.862	1.8738	7.5778	0.00287509	NA	NA	NA	NA	106	0.0536199	small	dry	0.0426275	0.206464
67	1024	moore	19-19-05	Ghana	2	Temp_19.1	Temp_1	19 C	75 % RH	Z. m. y	female	44	17	0.5507	0.0186288	Left	Forewing	ups	dry	180.756	1.51925	6.52445	0.000701841	NA	NA	NA	NA	106	0.0264923	small	dry	0.044811	0.211686
68	1006	moore	19-19-07	Ghana	2	Temp_19.1	Temp_1	19 C	75 % RH	Z. m. y	male	50	18	0.5106	0.0159854	Right	Forewing	uns	dry	145.208	1.4375	5.4698	0.00166142	NA	NA	NA	NA	106	0.0407606	small	dry	0.0339564	0.184273
69	968	moore	19-21-02	Ghana	2	Temp_21.1	Temp_1	19 C	75 % RH	Z. m. y	male	45	18	0.4956	0.0175859	Left	Forewing	ups	dry	144.768	1.24225	5.04345	0.0019958	NA	NA	NA	NA	106	0.0446744	small	dry	0.0366346	0.191402
70	850	moore	19-21-03	Ghana	2	Temp_21.1	Temp_1	19 C	75 % RH	Z. m. y	female	44	17	0.5211	0.0182889	Right	Forewing	uns	dry	154.581	1.49885	6.07995	0.00255496	NA	NA	NA	NA	106	0.0505466	small	dry	0.039421	0.198547
71	986	moore	19-21-04	Ghana	2	Temp_21.1	Temp_1	19 C	75 % RH	Z. m. y	male	46	17	0.3573	0.015426	Left	Forewing	ups	dry	119.056	1.03385	4.05875	0.00209393	NA	NA	NA	NA	106	0.0457595	small	dry	0.0268814	0.163955
72	994	moore	19-21-07	Ghana	2	Temp_21.1	Temp_1	19 C	75 % RH	Z. m. y	male	46	17	0.4353	0.0164755	Right	Forewing	uns	dry	145.07	1.0239	4.1276	0.00117215	NA	NA	NA	NA	106	0.0342367	small	dry	0.0233916	0.152943
73	991	moore	19-21-08	Ghana	2	Temp_21.1	Temp_1	19 C	75 % RH	Z. m. y	male	45	18	0.5173	0.0178389	Right	Forewing	uns	dry	143.231	1.34205	5.0708	0.00156291	NA	NA	NA	NA	106	0.0395337	small	dry	0.0368789	0.192039
74	992	moore	19-21-09	Ghana	2	Temp_21.1	Temp_1	19 C	75 % RH	Z. m. y	male	46	17	0.489	0.0171269	Left	Forewing	ups	dry	151.203	1.38035	5.3002	0.00150395	NA	NA	NA	NA	106	0.0387808	small	dry	0.0336385	0.183408
75	916	moore	19-21-10	Ghana	2	Temp_21.1	Temp_1	19 C	75 % RH	Z. m. y	female	47	16	0.4375	0.0161521	Right	Forewing	uns	dry	147.2	1.3235	5.5299	0.0028052	NA	NA	NA	NA	106	0.0529641	small	dry	0.0339255	0.184189
76	873	moore	19-21-11	Ghana	2	Temp_21.1	Temp_1	19 C	75 % RH	Z. m. y	male	47	16	0.3784	0.0153893	Left	Forewing	ups	dry	121.445	0.86705	3.64205	0.00312154	NA	NA	NA	NA	106	0.0558707	small	dry	0.0212806	0.145879
77	932	moore	19-21-12	Ghana	2	Temp_21.1	Temp_1	19 C	75 % RH	Z. m. y	female	48	15	0.3984	0.0153296	Left	Forewing	ups	dry	142.1	1.6613	6.2749	0.00212149	NA	NA	NA	NA	106	0.0460596	small	dry	0.0421669	0.205346
78	987	moore	19-21-13	Ghana	2	Temp_21.1	Temp_1	19 C	75 % RH	Z. m. y	female	49	16	NA	NA	Left	Forewing	ups	dry	122.93	0.9847	3.6707	0.00222871	NA	NA	NA	NA	106	0.0472092	small	dry	0.0374763	0.193588
79	777	moore	19-21-14	Ghana	2	Temp_21.1	Temp_1	19 C	75 % RH	Z. m. y	female	54	NA	NA	NA	Right	Forewing	uns	dry	140.162	1.36295	6.0204	0.00496925	NA	NA	NA	NA	106	0.0704929	small	dry	0.0585949	0.242064
80	775	moore	19-26-01	Ghana	2	Temp_26.1	Temp_1	19 C	75 % RH	Z. m. y	female	38	16	0.516	0.0211073	Right	Forewing	uns	dry	148.059	1.2766	5.5056	0.00343409	NA	NA	NA	NA	107	0.0586011	small	dry	0.0375829	0.193863
81	904	moore	19-26-02	Ghana	2	Temp_26.1	Temp_1	19 C	75 % RH	Z. m. y	male	37	17	0.4798	0.0211585	Right	Forewing	uns	dry	140.366	1.0572	4.16775	0.00322518	NA	NA	NA	NA	107	0.0567907	small	dry	0.0265295	0.162879
82	788	moore	19-26-03	Ghana	2	Temp_26.1	Temp_1	19 C	75 % RH	Z. m. y	female	38	16	0.4665	0.0204096	Left	Forewing	ups	dry	155.406	1.5599	6.1133	0.00380253	NA	NA	NA	NA	107	0.0616647	small	dry	0.040044	0.20011
83	823	moore	19-26-04	Ghana	2	Temp_26.1	Temp_1	19 C	75 % RH	Z. m. y	male	40	15	0.6115	0.0212197	Right	Forewing	uns	dry	165.39	1.2375	4.96155	0.0029046	NA	NA	NA	NA	107	0.0538944	small	dry	0.0317235	0.178111
84	844	moore	19-26-05	Ghana	2	Temp_26.1	Temp_1	19 C	75 % RH	Z. m. y	male	41	18	0.5263	0.0196922	Right	Forewing	uns	dry	150.806	1.16505	4.83635	0.00310285	NA	NA	NA	NA	107	0.0557032	small	dry	0.0307891	0.175468
85	701	moore	19-26-06	Ghana	2	Temp_26.1	Temp_1	19 C	75 % RH	Z. m. y	male	41	17	0.5925	0.0204855	Left	Forewing	ups	dry	167.506	1.4254	4.9752	0.00485892	NA	NA	NA	NA	107	0.0697059	small	dry	0.0307498	0.175356
86	895	moore	19-26-07	Ghana	2	Temp_26.1	Temp_1	19 C	75 % RH	Z. m. y	female	41	16	0.5152	0.0195528	Left	Forewing	ups	dry	159.227	1.78905	7.30925	0.00313608	NA	NA	NA	NA	107	0.0560007	small	dry	0.0443357	0.21056
87	856	moore	19-26-08	Ghana	2	Temp_26.1	Temp_1	19 C	75 % RH	Z. m. y	male	41	16	0.5332	0.0197779	Left	Forewing	ups	dry	149.791	1.17915	4.66515	0.00384497	NA	NA	NA	NA	107	0.0620078	small	dry	0.0236905	0.153917
88	908	moore	19-35-01	Ghana	2	moore_35.1	Temp_1	19 C	75 % RH	Z. m. y	male	38	17	0.4748	0.0205299	Left	Forewing	ups	dry	144.656	1.27355	5.25225	0.00299146	NA	NA	NA	NA	109	0.0546943	small	dry	0.0290572	0.170462
89	679	moore	19-35-02	Ghana	2	moore_35.1	Temp_1	19 C	75 % RH	Z. m. y	female	39	17	0.6547	0.0222647	Left	Forewing	ups	dry	187.584	1.4728	6.05105	0.00279638	NA	NA	NA	NA	109	0.0528808	small	dry	0.0326786	0.180772
90	810	moore	19-35-03	Ghana	2	moore_35.1	Temp_1	19 C	75 % RH	Z. m. y	male	40	18	0.5747	0.0207852	Left	Forewing	ups	dry	170.671	1.2305	4.1514	0.00318973	NA	NA	NA	NA	109	0.0564777	small	dry	0.0268583	0.163885
91	935	moore	19-35-05	Ghana	2	moore_35.1	Temp_1	19 C	75 % RH	Z. m. y	male	41	NA	0.5573	0.0200715	Left	Forewing	ups	dry	144.643	1.20785	4.236	0.00261434	NA	NA	NA	NA	109	0.0511307	small	dry	0.0291719	0.170798
92	1012	moore	19-35-07	Ghana	2	moore_35.1	Temp_1	19 C	75 % RH	Z. m. y	female	47	16	0.4917	0.0167933	Right	Forewing	uns	dry	148.048	1.53205	6.2506	0.000846607	NA	NA	NA	NA	109	0.0290965	small	dry	0.0395942	0.198983
93	981	moore	19-35-08	Ghana	2	moore_35.1	Temp_1	19 C	75 % RH	Z. m. y	female	46	16	0.3731	0.0156501	Left	Forewing	ups	dry	136.184	1.3676	5.4553	0.00215298	NA	NA	NA	NA	109	0.0464002	small	dry	0.037683	0.194121
94	787	moore	19-43-01	Ghana	2	moore_43.1	Temp_1	19 C	75 % RH	Z. m. y	male	40	18	0.6683	0.0218573	Right	Forewing	uns	dry	185.985	1.644	5.9263	0.00246097	NA	NA	NA	NA	111	0.0496082	small	dry	0.0402693	0.200672
95	782	moore	19-43-02	Ghana	2	moore_43.1	Temp_1	19 C	75 % RH	Z. m. y	male	42	16	0.5217	0.0191672	Left	Forewing	ups	dry	150.455	1.00575	3.95805	0.00404469	NA	NA	NA	NA	111	0.0635979	small	dry	0.0256051	0.160016
96	939	moore	19-43-03	Ghana	2	moore_43.1	Temp_1	19 C	75 % RH	Z. m. y	female	42	16	0.5384	0.0193695	Right	Forewing	uns	dry	163.474	1.1929	5.2971	0.00216783	NA	NA	NA	NA	111	0.0465599	small	dry	0.0306712	0.175132
97	937	moore	19-43-04	Ghana	2	moore_43.1	Temp_1	19 C	75 % RH	Z. m. y	female	43	15	0.588	0.0194831	Left	Forewing	ups	dry	174.885	1.5499	6.4423	0.00223245	NA	NA	NA	NA	111	0.0472488	small	dry	0.0541114	0.232619
98	756	moore	19-43-05	Ghana	2	moore_43.1	Temp_1	19 C	75 % RH	Z. m. y	female	43	17	0.4889	0.0183205	Left	Forewing	ups	dry	144.998	1.23325	5.15935	0.00444378	NA	NA	NA	NA	111	0.0666617	small	dry	0.0399668	0.199917
99	767	moore	19-43-07	Ghana	2	moore_43.1	Temp_1	19 C	75 % RH	Z. m. y	male	43	17	0.63	0.0199363	Left	Forewing	ups	dry	168.866	1.14845	4.4624	0.0032676	NA	NA	NA	NA	111	0.0571629	small	dry	0.0307604	0.175386
100	619	moore	19-43-08	Ghana	2	moore_43.1	Temp_1	19 C	75 % RH	Z. m. y	female	43	17	0.5292	0.0188107	Right	Forewing	uns	dry	146.909	1.39125	5.6526	0.00369508	NA	NA	NA	NA	111	0.0607872	small	dry	0.0380514	0.195068
101	797	moore	19-43-10	Ghana	2	moore_43.1	Temp_1	19 C	75 % RH	Z. m. y	male	43	17	0.6416	0.0200579	Right	Forewing	uns	dry	172.308	1.4543	5.7604	0.00377201	NA	NA	NA	NA	111	0.0614167	small	dry	0.0402175	0.200543
102	903	moore	19-43-11	Ghana	2	moore_43.1	Temp_1	19 C	75 % RH	Z. m. y	male	44	16	0.4781	0.0177713	Right	Forewing	uns	dry	155.287	1.3674	4.5737	0.00245711	NA	NA	NA	NA	111	0.0495692	small	dry	0.0311099	0.17638
103	696	moore	19-43-12	Ghana	2	moore_43.1	Temp_1	19 C	75 % RH	Z. m. y	male	44	16	0.5483	0.0186017	Left	Forewing	ups	dry	160.293	1.41345	5.04475	0.00371898	NA	NA	NA	NA	111	0.0609834	small	dry	0.0333641	0.182658
104	706	moore	19-43-13	Ghana	2	moore_43.1	Temp_1	19 C	75 % RH	Z. m. y	female	45	16	0.5354	0.0180446	Right	Forewing	uns	dry	164.249	1.47705	6.08845	0.00471939	NA	NA	NA	NA	111	0.0686978	small	dry	0.0388112	0.197006
105	704	moore	19-43-15	Ghana	2	moore_43.1	Temp_1	19 C	75 % RH	Z. m. y	female	45	17	0.6271	0.019021	Left	Forewing	ups	dry	182.167	1.40585	5.53105	0.00285722	NA	NA	NA	NA	111	0.053453	small	dry	0.037575	0.193843
106	997	moore	19-43-16	Ghana	2	moore_43.1	Temp_1	19 C	75 % RH	Z. m. y	female	48	NA	0.393	0.0152601	Right	Forewing	uns	dry	127.22	1.00975	4.08645	0.00157378	NA	NA	NA	NA	111	0.0396709	small	dry	0.0290894	0.170556
107	729	moore	19-43-18	Ghana	2	moore_43.1	Temp_1	19 C	75 % RH	Z. m. y	female	50	NA	0.4709	0.0155599	Left	Forewing	ups	dry	151.351	1.0969	4.9802	0.00397309	NA	NA	NA	NA	111	0.0630325	small	dry	0.0410077	0.202504
108	2905	hallow	1_21_55	India	1	hallow_3	Temp_HR	21 C	55 % RH	Z. m. y	female	26	13	0.4368	0.0291824	Right	Forewing	uns	dry	142.463	NA	4.8256	0.0164274	NA	NA	NA	NA	NA	0.12817	small	dry	0.0391352	0.197826
109	2915	hallow	10_21_55	India	1	hallow_4	Temp_HR	21 C	55 % RH	Z. m. y	female	26	12	0.5022	0.0305717	Right	Forewing	uns	dry	153.228	NA	6.2254	0.0180098	NA	NA	NA	NA	NA	0.134201	small	dry	0.0438101	0.209309
110	2925	hallow	11_21_55	India	1	hallow_4	Temp_HR	21 C	55 % RH	Z. m. y	male	26	13	0.4668	0.0298357	Right	Forewing	uns	dry	126.098	NA	3.9958	0.0149788	NA	NA	NA	NA	NA	0.122388	small	dry	0.0277699	0.166643
111	2935	hallow	12_21_55	India	1	hallow_4	Temp_HR	21 C	55 % RH	Z. m. y	male	30	10	0.5055	0.0265533	Right	Forewing	uns	dry	155.917	NA	5.2431	0.00596919	NA	NA	NA	NA	NA	0.0772605	small	dry	0.0426512	0.206522
112	2945	hallow	13_21_55	India	1	hallow_4	Temp_HR	21 C	55 % RH	Z. m. y	male	35	13	0.4613	0.0220763	Right	Forewing	uns	dry	134.137	NA	5.2651	0.00412414	NA	NA	NA	NA	NA	0.0642194	small	dry	0.0449916	0.212112
113	2955	hallow	14_21_55	India	1	hallow_4	Temp_HR	21 C	55 % RH	Z. m. y	female	33	9	0.4389	0.023029	Right	Forewing	uns	dry	142.904	NA	5.1055	0.00432177	NA	NA	NA	NA	NA	0.0657402	small	dry	0.0364258	0.190855
114	2965	hallow	15_21_55	India	1	hallow_4	Temp_HR	21 C	55 % RH	Z. m. y	male	33	12	0.4569	0.0233396	Right	Forewing	uns	dry	143.795	NA	6.1845	0.0052123	NA	NA	NA	NA	NA	0.0721962	small	dry	0.0388831	0.197188
115	2983	hallow	17_21_55	India	1	hallow_3	Temp_HR	21 C	55 % RH	Z. m. y	female	35	13	0.3745	0.0205944	Right	Forewing	uns	dry	139.156	NA	5.2846	0.0030685	NA	NA	NA	NA	NA	0.0553941	small	dry	0.0356925	0.188925
116	2993	hallow	18_21_55	India	1	hallow_11	Temp_HR	21 C	55 % RH	Z. m. y	female	25	NA	0.4107	0.0297327	Right	Forewing	uns	dry	NA	NA	NA	NA	NA	NA	NA	NA	NA	NA	NA	dry	NA	NA
117	3003	hallow	19_21_55	India	1	hallow_11	Temp_HR	21 C	55 % RH	Z. m. y	female	25	11	0.3875	0.029162	Right	Forewing	uns	wet	141.099	NA	5.0126	0.0143211	NA	NA	NA	NA	NA	0.119671	small	dry	0.035711	0.188973
118	3013	hallow	2_21_55	India	1	hallow_3	Temp_HR	21 C	55 % RH	Z. m. y	male	26	13	0.4267	0.0289557	Right	Forewing	NA	dry	136.701	NA	4.6402	0.00776149	NA	NA	NA	NA	NA	0.0880993	small	dry	0.0303371	0.174176
119	3023	hallow	20_21_55	India	1	hallow_11	Temp_HR	21 C	55 % RH	Z. m. y	male	25	10	0.3705	0.0287291	Right	Forewing	NA	wet	109.001	NA	3.3137	0.0319226	NA	NA	NA	NA	NA	0.178669	large	wet	0.0213228	0.146023
120	3033	hallow	21_21_55	India	1	hallow_3	Temp_HR	21 C	55 % RH	Z. m. y	male	37	13	0.3905	0.0197548	Right	Forewing	NA	dry	136.302	NA	7.9064	0.00547975	NA	NA	NA	NA	NA	0.0740253	small	dry	0.0493043	0.222046
121	3043	hallow	22_21_55	India	1	hallow_11	Temp_HR	21 C	55 % RH	Z. m. y	male	37	NA	0.4502	0.0207141	Right	Forewing	NA	NA	NA	NA	NA	NA	NA	NA	NA	NA	NA	NA	NA	NA	NA	NA
122	3053	hallow	23_21_55	India	1	hallow_11	Temp_HR	21 C	55 % RH	Z. m. y	male	27	NA	0.2928	0.0245939	Right	Forewing	NA	NA	NA	NA	NA	NA	NA	NA	NA	NA	NA	NA	NA	NA	NA	NA
123	3061	hallow	24_21_55	India	1	hallow_11	Temp_HR	21 C	55 % RH	Z. m. y	female	27	12	0.4251	0.0278484	Right	Forewing	NA	NA	NA	NA	NA	NA	NA	NA	NA	NA	NA	NA	NA	NA	NA	NA
124	3069	hallow	25_21_55	India	1	hallow_11	Temp_HR	21 C	55 % RH	Z. m. y	female	27	10	0.403	0.0273572	Right	Forewing	NA	dry	NA	NA	NA	NA	NA	NA	NA	NA	NA	NA	NA	dry	NA	NA
125	3077	hallow	26_21_55	India	1	hallow_11	Temp_HR	21 C	55 % RH	Z. m. y	male	27	12	0.412	0.0275593	Right	Forewing	NA	dry	130.405	NA	3.393	0.0043572	NA	NA	NA	NA	NA	0.0660091	small	dry	0.020256	0.142324
126	3085	hallow	27_21_55	India	1	hallow_11	Temp_HR	21 C	55 % RH	Z. m. y	female	27	10	0.3277	0.0255346	Right	Forewing	NA	wet	NA	NA	NA	NA	NA	NA	NA	NA	NA	NA	NA	wet	NA	NA
127	3093	hallow	28_21_55	India	1	hallow_18	Temp_HR	21 C	55 % RH	Z. m. y	male	24	NA	0.2625	0.0266787	Right	Forewing	NA	NA	NA	NA	NA	NA	NA	NA	NA	NA	NA	NA	NA	NA	NA	NA
128	3099	hallow	29_21_55	India	1	hallow_18	Temp_HR	21 C	55 % RH	Z. m. y	male	24	NA	0.3813	0.0302142	Right	Forewing	NA	NA	NA	NA	NA	NA	NA	NA	NA	NA	NA	NA	NA	NA	NA	NA
129	3107	hallow	3_21_55	India	1	hallow_3	Temp_HR	21 C	55 % RH	Z. m. y	male	26	13	0.3918	0.0281437	Right	Forewing	NA	dry	125.111	NA	3.2881	0.00973614	NA	NA	NA	NA	NA	0.0986719	small	dry	0.0219513	0.14816
130	3115	hallow	30_21_55	India	1	hallow_18	Temp_HR	21 C	55 % RH	Z. m. y	male	24	NA	0.3452	0.0292289	Right	Forewing	NA	NA	NA	NA	NA	NA	NA	NA	NA	NA	NA	NA	NA	NA	NA	NA
131	3121	hallow	31_21_55	India	1	hallow_11	Temp_HR	21 C	55 % RH	Z. m. y	female	27	NA	0.3609	0.0263693	Right	Forewing	NA	NA	NA	NA	NA	NA	NA	NA	NA	NA	NA	NA	NA	NA	NA	NA
132	3127	hallow	32_21_55	India	1	hallow_18	Temp_HR	21 C	55 % RH	Z. m. y	male	24	14	0.3646	0.0297665	Right	Forewing	NA	wet	107.436	NA	1.6374	0.0221509	NA	NA	NA	NA	NA	0.148832	small	dry	0.0105054	0.102496
133	3133	hallow	33_21_55	India	1	hallow_18	Temp_HR	21 C	55 % RH	Z. m. y	male	24	14	0.3547	0.0294946	Right	Forewing	NA	wet	101.982	NA	1.2911	0.026232	NA	NA	NA	NA	NA	0.161963	large	wet	0.0068828	0.0829626
134	3139	hallow	34_21_55	India	1	hallow_18	Temp_HR	21 C	55 % RH	Z. m. y	female	24	14	0.3963	0.0306053	Right	Forewing	NA	wet	133.98	NA	2.5731	0.018973	NA	NA	NA	NA	NA	0.137742	small	dry	0.0131077	0.114489
135	3145	hallow	35_21_55	India	1	hallow_11	Temp_HR	21 C	55 % RH	Z. m. y	male	27	14	0.3231	0.0254145	Right	Forewing	NA	dry	117.273	NA	2.3322	0.0117504	NA	NA	NA	NA	NA	0.108399	small	dry	0.0136649	0.116897
136	3151	hallow	36_21_55	India	1	hallow_18	Temp_HR	21 C	55 % RH	Z. m. y	female	30	9	0.3418	0.0233061	Right	Forewing	NA	wet	NA	NA	NA	NA	NA	NA	NA	NA	NA	NA	NA	wet	NA	NA
137	3155	hallow	37_21_55	India	1	hallow_18	Temp_HR	21 C	55 % RH	Z. m. y	male	30	10	0.3167	0.022721	Right	Forewing	NA	NA	111.105	NA	2.849	0.0164791	NA	NA	NA	NA	NA	0.128371	small	dry	0.0238016	0.154278
138	3159	hallow	38_21_55	India	1	hallow_18	Temp_HR	21 C	55 % RH	Z. m. y	male	30	10	0.3525	0.0235468	Right	Forewing	NA	NA	NA	NA	NA	NA	NA	NA	NA	NA	NA	NA	NA	NA	NA	NA
139	3163	hallow	39_21_55	India	1	hallow_18	Temp_HR	21 C	55 % RH	Z. m. y	male	30	10	0.3525	0.0235468	Right	Forewing	NA	NA	NA	NA	NA	NA	NA	NA	NA	NA	NA	NA	NA	NA	NA	NA
140	3169	hallow	4_21_55	India	1	hallow_3	Temp_HR	21 C	55 % RH	Z. m. y	female	26	12	0.3585	0.0273227	Right	Forewing	NA	dry	120.709	NA	2.8911	0.0164213	NA	NA	NA	NA	NA	0.128146	small	dry	0.0195282	0.139743
141	3197	hallow	5_21_55	India	1	hallow_4	Temp_HR	21 C	55 % RH	Z. m. y	female	24	15	0.4432	0.0317679	Right	Forewing	NA	dry	150.986	NA	4.8561	0.00702779	NA	NA	NA	NA	NA	0.0838319	small	dry	0.0311412	0.176469
142	3227	hallow	6_21_55	India	1	hallow_3	Temp_HR	21 C	55 % RH	Z. m. y	female	27	13	0.466	0.0287143	Right	Forewing	NA	dry	154.363	NA	6.6109	0.00813149	NA	NA	NA	NA	NA	0.0901748	small	dry	0.048544	0.220327
143	3243	hallow	7_21_55	India	1	hallow_3	Temp_HR	21 C	55 % RH	Z. m. y	male	27	11	0.4004	0.0272982	Right	Forewing	NA	dry	126.89	NA	4.1019	0.00627156	NA	NA	NA	NA	NA	0.0791932	small	dry	0.0288836	0.169952
144	3261	hallow	9_21_55	India	1	hallow_4	Temp_HR	21 C	55 % RH	Z. m. y	female	26	11	0.4952	0.0304289	Right	Forewing	NA	wet	145.723	NA	3.7327	0.0183842	NA	NA	NA	NA	NA	0.135588	small	dry	0.0200699	0.141668
145	39	moore	22-01-02	Ghana	3	Temp_1.2	Temp_2	22 C	75 % RH	Z. m. y	female	22	9	0.5705	0.0376989	Left	Forewing	ups	wet	155.934	0.59955	1.9596	0.0524658	NA	NA	NA	NA	153	0.229054	large	wet	0.00940724	0.0969909
146	88	moore	22-01-03	Ghana	3	Temp_1.2	Temp_2	22 C	75 % RH	Z. m. y	female	22	11	0.5468	0.0371695	Left	Forewing	ups	wet	153.543	0.614	2.13185	0.0428969	NA	NA	NA	NA	153	0.207116	large	wet	0.0141694	0.119035
147	40	moore	22-01-04	Ghana	3	Temp_1.2	Temp_2	22 C	75 % RH	Z. m. y	female	22	9	0.501	0.0361013	Left	Forewing	ups	wet	155.039	0.6842	2.44945	0.0321012	NA	NA	NA	NA	153	0.179168	large	wet	0.015244	0.123467
148	41	moore	22-01-05	Ghana	3	Temp_1.2	Temp_2	22 C	75 % RH	Z. m. y	female	22	11	0.4782	0.0355452	Left	Forewing	ups	wet	139.498	0.6704	2.855	0.0577508	NA	NA	NA	NA	153	0.240314	large	wet	0.0174646	0.132154
149	783	moore	22-01-06	Ghana	3	Temp_1.2	Temp_2	22 C	75 % RH	Z. m. y	female	23	10	0.5084	0.0347009	Left	Forewing	ups	wet	150.195	0.71065	2.24785	0.0283224	NA	NA	NA	NA	153	0.168293	large	wet	0.0129362	0.113737
150	28	moore	22-01-07	Ghana	3	Temp_1.2	Temp_2	22 C	75 % RH	Z. m. y	female	24	10	0.5418	0.0339679	Left	Forewing	ups	wet	145.922	0.6663	2.818	0.0319513	NA	NA	NA	NA	153	0.178749	large	wet	0.0161135	0.126939
151	636	moore	22-01-08	Ghana	3	Temp_1.2	Temp_2	22 C	75 % RH	Z. m. y	female	24	10	0.5182	0.0334673	Right	Forewing	uns	wet	154.073	0.73515	2.54245	0.0508481	NA	NA	NA	NA	153	0.225495	large	wet	0.0134241	0.115863
152	633	moore	22-01-11	Ghana	3	Temp_1.2	Temp_2	22 C	75 % RH	Z. m. y	female	25	10	0.5052	0.0318577	Right	Forewing	uns	wet	152.01	1.097	3.6062	0.049914	NA	NA	NA	NA	153	0.223414	large	wet	0.0248707	0.157705
153	17	moore	22-01-14	Ghana	3	Temp_1.2	Temp_2	22 C	75 % RH	Z. m. y	female	26	10	0.5214	0.0309564	Left	Forewing	ups	wet	163.553	0.88195	3.5609	0.0209567	NA	NA	NA	NA	153	0.144764	small	dry	0.0225038	0.150013
154	11	moore	22-01-15	Ghana	3	Temp_1.2	Temp_2	22 C	75 % RH	Z. m. y	female	27	10	0.5446	0.0302456	Right	Forewing	uns	wet	165.171	0.85265	3.27	0.0307659	NA	NA	NA	NA	153	0.175402	large	wet	0.0193645	0.139156
155	9	moore	22-01-16	Ghana	3	Temp_1.2	Temp_2	22 C	75 % RH	Z. m. y	female	28	9	0.4154	0.026648	Right	Forewing	uns	wet	128.288	0.70025	2.50735	0.0546385	NA	NA	NA	NA	153	0.233749	large	wet	0.0136787	0.116956
156	42	moore	22-02-02	Ghana	3	Temp_2.2	Temp_2	22 C	75 % RH	Z. m. y	male	21	9	0.4618	0.0368071	Right	Forewing	uns	wet	114.446	0.3069	0.86965	0.0509737	NA	NA	NA	NA	153	0.225773	large	wet	0.00591964	0.0769392
157	43	moore	22-02-04	Ghana	3	Temp_2.2	Temp_2	22 C	75 % RH	Z. m. y	male	22	11	0.5006	0.0360917	Right	Forewing	uns	wet	129.756	0.2349	0.5694	0.0548512	NA	NA	NA	NA	153	0.234203	large	wet	0.0033593	0.0579594
158	7	moore	22-02-05	Ghana	3	Temp_2.2	Temp_2	22 C	75 % RH	Z. m. y	male	23	10	0.4047	0.03216	Right	Forewing	uns	wet	98.4854	0.2343	0.59985	0.0442162	NA	NA	NA	NA	153	0.210276	large	wet	0.00348126	0.0590022
159	86	moore	22-02-06	Ghana	3	Temp_2.2	Temp_2	22 C	75 % RH	Z. m. y	male	23	11	0.4236	0.0326531	Left	Forewing	ups	wet	114.533	0.32555	0.96975	0.0467386	NA	NA	NA	NA	153	0.216191	large	wet	0.00535005	0.073144
160	35	moore	22-02-07	Ghana	3	Temp_2.2	Temp_2	22 C	75 % RH	Z. m. y	female	23	10	0.4041	0.0321441	Left	Forewing	ups	wet	126.552	0.6383	2.2912	0.0588261	NA	NA	NA	NA	153	0.242541	large	wet	0.0147546	0.121469
161	36	moore	22-02-08	Ghana	3	Temp_2.2	Temp_2	22 C	75 % RH	Z. m. y	female	24	10	0.3824	0.0302432	Left	Forewing	ups	wet	128.822	0.6561	2.6293	0.036374	NA	NA	NA	NA	153	0.19072	large	wet	0.01642	0.12814
162	710	moore	22-02-10	Ghana	3	Temp_2.2	Temp_2	22 C	75 % RH	Z. m. y	male	25	11	0.3494	0.0281731	Left	Forewing	ups	wet	108.284	0.4193	1.2386	0.0332288	NA	NA	NA	NA	153	0.182288	large	wet	0.00772712	0.087904
163	5	moore	22-02-11	Ghana	3	Temp_2.2	Temp_2	22 C	75 % RH	Z. m. y	female	25	11	0.4793	0.0313037	Right	Forewing	uns	wet	154.819	0.772	2.7108	0.0280625	NA	NA	NA	NA	153	0.167519	large	wet	0.0172131	0.131199
164	18	moore	22-02-12	Ghana	3	Temp_2.2	Temp_2	22 C	75 % RH	Z. m. y	female	26	11	0.4272	0.028967	Left	Forewing	ups	int	132.542	0.9116	3.69345	0.0214499	NA	NA	NA	NA	153	0.146458	small	dry	0.0224869	0.149956
165	602	moore	22-02-13	Ghana	3	Temp_2.2	Temp_2	22 C	75 % RH	Z. m. y	female	26	10	0.4285	0.0289964	Left	Forewing	ups	wet	138.393	0.59935	1.9348	0.0595034	NA	NA	NA	NA	153	0.243933	large	wet	0.0122158	0.110525
166	12	moore	22-02-14	Ghana	3	Temp_2.2	Temp_2	22 C	75 % RH	Z. m. y	male	27	10	0.3246	0.0254538	Left	Forewing	ups	wet	104.785	0.5036	1.28995	0.0278644	NA	NA	NA	NA	153	0.166926	large	wet	0.00708115	0.0841496
167	4	moore	22-02-15	Ghana	3	Temp_2.2	Temp_2	22 C	75 % RH	Z. m. y	female	27	11	0.5324	0.030018	Right	Forewing	uns	wet	148.108	1.1184	4.08915	0.030152	NA	NA	NA	NA	153	0.173643	large	wet	0.0211035	0.145271
168	665	moore	22-02-16	Ghana	3	Temp_2.2	Temp_2	22 C	75 % RH	Z. m. y	female	28	10	0.352	0.0252168	Right	Forewing	uns	wet	112.125	0.52635	2.0874	0.0485673	NA	NA	NA	NA	153	0.22038	large	wet	0.0164078	0.128093
169	8	moore	22-02-17	Ghana	3	Temp_2.2	Temp_2	22 C	75 % RH	Z. m. y	female	29	11	0.4711	0.0268312	Left	Forewing	ups	wet	146.953	0.9459	3.29555	0.0303708	NA	NA	NA	NA	153	0.174272	large	wet	0.0253815	0.159316
170	428	moore	22-03-01	Ghana	2	moore_3.1	Temp_1	22 C	75 % RH	Z. m. y	male	NA	NA	NA	NA	Right	Forewing	uns	wet	91.8036	0.09614	0.29175	0.0339175	NA	NA	NA	NA	99	0.184167	large	wet	0.00192764	0.0439049
171	70	moore	22-03-02	Ghana	3	moore_3.2	Temp_2	22 C	75 % RH	Z. m. y	male	21	10	0.3916	0.0348387	Left	Forewing	ups	wet	105.915	0.42475	1.08755	0.0321477	NA	NA	NA	NA	153	0.179298	large	wet	0.00687906	0.0829401
172	483	moore	22-03-02a	Ghana	2	moore_3.1	Temp_1	22 C	75 % RH	Z. m. y	male	21	8	0.3233	0.0326825	Left	Forewing	ups	wet	81.1461	0.2697	0.5416	0.0420616	NA	NA	NA	NA	99	0.205089	large	wet	0.00589955	0.0768085
173	216	moore	22-03-04	Ghana	2	moore_3.1	Temp_1	22 C	75 % RH	Z. m. y	female	23	11	0.3525	0.0307132	Left	Forewing	ups	wet	93.3684	0.21525	0.64715	0.0531313	NA	NA	NA	NA	99	0.230502	large	wet	0.00689787	0.0830534
174	547	moore	22-03-05	Ghana	2	moore_3.1	Temp_1	22 C	75 % RH	Z. m. y	female	23	11	0.4635	0.0336477	Right	Forewing	uns	wet	137.635	0.6516	2.3933	0.0188745	NA	NA	NA	NA	99	0.137385	small	dry	0.0294937	0.171737
175	894	moore	22-03-06	Ghana	3	moore_3.2	Temp_2	22 C	75 % RH	Z. m. y	male	23	10	0.3898	0.0317604	Left	Forewing	ups	wet	105.978	0.2619	0.852	0.0533433	NA	NA	NA	NA	153	0.230962	large	wet	0.0114964	0.107221
176	400	moore	22-03-06a	Ghana	2	moore_3.1	Temp_1	22 C	75 % RH	Z. m. y	male	23	11	0.3355	0.0302113	Left	Forewing	ups	wet	93.9039	0.22345	0.70905	0.0381208	NA	NA	NA	NA	99	0.195246	large	wet	0.00759412	0.0871442
177	59	moore	22-03-07	Ghana	3	moore_3.2	Temp_2	22 C	75 % RH	Z. m. y	female	24	9	0.4761	0.0325353	Left	Forewing	ups	wet	144.144	0.68755	2.36085	0.0427479	NA	NA	NA	NA	153	0.206756	large	wet	0.0262735	0.162091
178	138	moore	22-03-07a	Ghana	2	moore_3.1	Temp_1	22 C	75 % RH	Z. m. y	female	22	NA	0.3862	0.0331015	Left	Forewing	ups	wet	119.601	0.501	1.8295	0.050992	NA	NA	NA	NA	99	0.225814	large	wet	0.0132924	0.115293
179	410	moore	22-03-08a	Ghana	2	moore_3.1	Temp_1	22 C	75 % RH	Z. m. y	female	23	11	0.4502	0.0333227	Left	Forewing	ups	wet	106.237	0.56075	2.1214	0.0311719	NA	NA	NA	NA	99	0.176556	large	wet	0.0147531	0.121462
180	103	moore	22-03-08b	Ghana	3	moore_3.2	Temp_2	22 C	75 % RH	Z. m. y	male	24	11	0.4894	0.0328355	Right	Forewing	uns	wet	111.623	0.31975	0.72745	0.0577697	NA	NA	NA	NA	153	0.240353	large	wet	0.00774675	0.0880156
181	317	moore	22-03-09	Ghana	2	moore_3.1	Temp_1	22 C	75 % RH	Z. m. y	female	24	10	0.4605	0.032176	Left	Forewing	ups	wet	123.758	0.575	1.7917	0.0315045	NA	NA	NA	NA	99	0.177495	large	wet	0.0192821	0.13886
182	768	moore	22-03-10	Ghana	3	moore_3.2	Temp_2	22 C	75 % RH	Z. m. y	female	25	10	0.5159	0.032081	Left	Forewing	ups	wet	152.636	0.8077	2.6666	0.0437605	NA	NA	NA	NA	153	0.20919	large	wet	0.0222958	0.149318
183	161	moore	22-03-10a	Ghana	2	moore_3.1	Temp_1	22 C	75 % RH	Z. m. y	female	24	10	0.4744	0.0324965	Right	Forewing	uns	wet	143.125	0.69975	2.4217	0.0359847	NA	NA	NA	NA	99	0.189696	large	wet	0.0209817	0.144851
184	58	moore	22-03-11	Ghana	3	moore_3.2	Temp_2	22 C	75 % RH	Z. m. y	female	25	10	0.5262	0.0322931	Left	Forewing	ups	wet	154.279	0.85005	3.3971	0.0590052	NA	NA	NA	NA	153	0.24291	large	wet	0.0319766	0.17882
185	490	moore	22-03-11a	Ghana	2	moore_3.1	Temp_1	22 C	75 % RH	Z. m. y	male	24	10	0.323	0.0285884	Right	Forewing	uns	wet	96.1453	0.33205	1.0194	0.031589	NA	NA	NA	NA	99	0.177733	large	wet	0.00823706	0.0907583
186	19	moore	22-03-12	Ghana	3	moore_3.2	Temp_2	22 C	75 % RH	Z. m. y	female	26	11	0.5475	0.0314645	Left	Forewing	ups	wet	169.519	1.04925	4.0527	0.0160733	NA	NA	NA	NA	153	0.12678	small	dry	0.0319297	0.178689
187	264	moore	22-03-12a	Ghana	2	moore_3.1	Temp_1	22 C	75 % RH	Z. m. y	female	24	10	0.4285	0.0314127	Right	Forewing	uns	wet	120.707	0.56225	2.01785	0.0369446	NA	NA	NA	NA	99	0.19221	large	wet	0.0140985	0.118737
188	545	moore	22-03-15	Ghana	2	moore_3.1	Temp_1	22 C	75 % RH	Z. m. y	male	25	10	0.4367	0.0303474	Right	Forewing	uns	wet	115.689	0.4072	1.4699	0.0244431	NA	NA	NA	NA	99	0.156343	large	wet	0.0106388	0.103145
189	378	moore	22-04-01	Ghana	2	moore_4.1	Temp_1	22 C	75 % RH	Z. m. y	male	21	12	NA	NA	Left	Forewing	ups	wet	127.083	0.3498	0.7038	0.0284533	NA	NA	NA	NA	100	0.168681	large	wet	0.00732017	0.085558
190	74	moore	22-04-01a	Ghana	3	moore_4.2	Temp_2	22 C	75 % RH	Z. m. y	male	19	11	0.4944	0.0416172	Right	Forewing	uns	wet	117.618	0.2551	0.9202	0.0494687	NA	NA	NA	NA	153	0.222416	large	wet	0.00994015	0.0997003
191	440	moore	22-04-02	Ghana	2	moore_4.1	Temp_1	22 C	75 % RH	Z. m. y	male	21	12	NA	NA	Right	Forewing	uns	wet	106.98	0.358	0.8437	0.0292144	NA	NA	NA	NA	100	0.170922	large	wet	0.00698962	0.083604
192	72	moore	22-04-02a	Ghana	3	moore_4.2	Temp_2	22 C	75 % RH	Z. m. y	male	21	10	0.3968	0.0349922	Left	Forewing	ups	wet	98.5987	0.2691	0.6014	0.0294991	NA	NA	NA	NA	153	0.171753	large	wet	0.00499286	0.0706601
193	164	moore	22-04-03	Ghana	2	moore_4.1	Temp_1	22 C	75 % RH	Z. m. y	female	23	10	0.625	0.0371734	Right	Forewing	uns	wet	159.376	0.7706	2.8008	0.0356045	NA	NA	NA	NA	100	0.188691	large	wet	0.0242097	0.155595
194	63	moore	22-04-04a	Ghana	3	moore_4.2	Temp_2	22 C	75 % RH	Z. m. y	male	22	11	0.4509	0.0348555	Right	Forewing	uns	wet	120.635	0.3657	1.07235	0.0371205	NA	NA	NA	NA	153	0.192667	large	wet	0.00907881	0.0952828
195	437	moore	22-04-05	Ghana	2	moore_4.1	Temp_1	22 C	75 % RH	Z. m. y	male	23	10	0.4265	0.0327274	Left	Forewing	ups	wet	108.112	0.48765	1.56095	0.0315685	NA	NA	NA	NA	100	0.177675	large	wet	0.0122829	0.110828
196	579	moore	22-04-06	Ghana	2	moore_4.1	Temp_1	22 C	75 % RH	Z. m. y	female	24	9	0.5275	0.0336664	Right	Forewing	uns	wet	145.326	0.8019	2.5264	0.0145916	NA	NA	NA	NA	100	0.120796	small	dry	0.0182214	0.134987
197	299	moore	22-04-07	Ghana	2	moore_4.1	Temp_1	22 C	75 % RH	Z. m. y	male	22	11	0.5178	0.0365004	Left	Forewing	ups	wet	125.35	0.42575	0.7671	0.0305188	NA	NA	NA	NA	100	0.174696	large	wet	0.00717048	0.0846787
198	254	moore	22-04-08	Ghana	2	moore_4.1	Temp_1	22 C	75 % RH	Z. m. y	female	24	10	0.6476	0.0360488	Right	Forewing	uns	wet	165.557	0.9385	3.6195	0.0273183	NA	NA	NA	NA	100	0.165283	large	wet	0.0341585	0.18482
199	211	moore	22-04-09	Ghana	2	moore_4.1	Temp_1	22 C	75 % RH	Z. m. y	female	24	10	0.4891	0.0328288	Right	Forewing	uns	wet	137.794	0.6774	2.5316	0.0314505	NA	NA	NA	NA	100	0.177343	large	wet	0.0158844	0.126033
200	121	moore	22-04-10	Ghana	2	moore_4.1	Temp_1	22 C	75 % RH	Z. m. y	female	26	9	0.5459	0.0314339	Left	Forewing	ups	wet	118.105	0.8868	3.41955	0.0576732	NA	NA	NA	NA	100	0.240152	large	wet	0.0216159	0.147023
201	259	moore	22-04-11	Ghana	2	moore_4.1	Temp_1	22 C	75 % RH	Z. m. y	female	26	8	0.547	0.031455	Left	Forewing	ups	wet	155.537	0.78205	2.93025	0.0301291	NA	NA	NA	NA	100	0.173577	large	wet	0.0206322	0.143639
202	166	moore	22-04-12	Ghana	2	moore_4.1	Temp_1	22 C	75 % RH	Z. m. y	female	26	9	0.5192	0.0309128	Right	Forewing	uns	wet	152.461	0.88055	3.2742	0.0369401	NA	NA	NA	NA	100	0.192198	large	wet	0.0302851	0.174026
203	737	moore	22-05-02	Ghana	3	moore_5.2	Temp_2	22 C	75 % RH	Z. m. y	female	21	9	0.4648	0.0368867	Right	Forewing	uns	wet	133.278	0.45085	1.8258	0.0638413	NA	NA	NA	NA	154	0.252668	large	wet	0.0161031	0.126898
204	969	moore	22-05-03	Ghana	3	moore_5.2	Temp_2	22 C	75 % RH	Z. m. y	female	22	10	0.4767	0.035508	Left	Forewing	ups	wet	125.32	0.5585	2.3166	0.0664645	NA	NA	NA	NA	154	0.257807	large	wet	0.0159407	0.126257
205	64	moore	22-05-04	Ghana	3	moore_5.2	Temp_2	22 C	75 % RH	Z. m. y	female	22	10	0.5208	0.0365708	Right	Forewing	uns	wet	145.259	0.76785	2.7766	0.0348997	NA	NA	NA	NA	154	0.186814	large	wet	0.0180199	0.134238
206	644	moore	22-05-05	Ghana	3	moore_5.2	Temp_2	22 C	75 % RH	Z. m. y	female	22	10	0.5	0.0360773	Left	Forewing	ups	wet	137.946	0.8842	3.0697	0.055768	NA	NA	NA	NA	154	0.236153	large	wet	0.0244891	0.15649
207	108	moore	22-05-07	Ghana	3	moore_5.2	Temp_2	22 C	75 % RH	Z. m. y	male	23	11	0.4415	0.0331067	Right	Forewing	uns	wet	126.106	0.6035	1.93955	0.0578037	NA	NA	NA	NA	154	0.240424	large	wet	0.0155746	0.124798
208	595	moore	22-05-09	Ghana	3	moore_5.2	Temp_2	22 C	75 % RH	Z. m. y	female	25	11	0.4895	0.0315242	Right	Forewing	uns	wet	155.079	1.2396	4.7478	0.0324643	NA	NA	NA	NA	154	0.180178	large	wet	0.0286777	0.169345
209	588	moore	22-05-13	Ghana	3	moore_5.2	Temp_2	22 C	75 % RH	Z. m. y	male	27	12	0.4849	0.0290974	Right	Forewing	uns	wet	125.251	0.6306	2.49265	0.0378105	NA	NA	NA	NA	154	0.194449	large	wet	0.0141366	0.118898
210	128	moore	22-07-02	Ghana	2	moore_7.1	Temp_1	22 C	75 % RH	Z. m. y	female	21	9	0.5736	0.0395655	Left	Forewing	ups	wet	153.531	0.62765	2.36365	0.0429748	NA	NA	NA	NA	103	0.207304	large	wet	0.0171535	0.130971
211	116	moore	22-07-03	Ghana	2	moore_7.1	Temp_1	22 C	75 % RH	Z. m. y	female	23	9	0.555	0.0357303	Left	Forewing	ups	wet	147.799	0.67795	2.26125	0.0650268	NA	NA	NA	NA	103	0.255004	large	wet	0.0161137	0.12694
212	553	moore	22-07-05	Ghana	2	moore_7.1	Temp_1	22 C	75 % RH	Z. m. y	male	33	11	0.2512	0.0191202	Left	Forewing	ups	wet	68.4375	0.40245	1.4187	0.0304973	NA	NA	NA	NA	103	0.174635	large	wet	0.0120122	0.1096
213	371	moore	22-12-01	Ghana	2	Temp_12.1	Temp_1	22 C	75 % RH	Z. m. y	male	23	9	0.5288	0.035159	Right	Forewing	uns	wet	122.78	0.37045	0.9899	0.0305041	NA	NA	NA	NA	104	0.174654	large	wet	0.00687785	0.0829328
214	261	moore	22-12-02	Ghana	2	Temp_12.1	Temp_1	22 C	75 % RH	Z. m. y	male	23	10	0.5103	0.0347441	Left	Forewing	ups	wet	120.537	0.36015	0.99365	0.0361662	NA	NA	NA	NA	104	0.190174	large	wet	0.00638852	0.0799282
215	120	moore	22-12-03	Ghana	2	Temp_12.1	Temp_1	22 C	75 % RH	Z. m. y	female	24	9	0.5505	0.0341487	Right	Forewing	uns	wet	144.205	0.59115	1.88755	0.0559043	NA	NA	NA	NA	104	0.236441	large	wet	0.0116606	0.107984
216	181	moore	22-12-04	Ghana	2	Temp_12.1	Temp_1	22 C	75 % RH	Z. m. y	female	24	9	0.5889	0.034925	Left	Forewing	ups	wet	129.915	0.6098	2.07815	0.0360025	NA	NA	NA	NA	104	0.189743	large	wet	0.0136307	0.11675
217	212	moore	22-12-05	Ghana	2	Temp_12.1	Temp_1	22 C	75 % RH	Z. m. y	female	24	9	0.4875	0.0327929	Right	Forewing	uns	wet	130.249	0.79785	2.45265	0.0405332	NA	NA	NA	NA	104	0.201329	large	wet	0.0158822	0.126025
218	432	moore	22-12-06	Ghana	2	Temp_12.1	Temp_1	22 C	75 % RH	Z. m. y	male	24	9	0.5109	0.0333094	Left	Forewing	ups	wet	120.567	0.36975	1.03215	0.0229731	NA	NA	NA	NA	104	0.151569	large	wet	0.0094087	0.0969984
219	221	moore	22-12-07	Ghana	2	Temp_12.1	Temp_1	22 C	75 % RH	Z. m. y	female	25	10	0.5712	0.0331886	Left	Forewing	ups	wet	145.21	0.91675	3.16445	0.0342007	NA	NA	NA	NA	104	0.184934	large	wet	0.0206112	0.143566
220	287	moore	22-12-08	Ghana	2	Temp_12.1	Temp_1	22 C	75 % RH	Z. m. y	female	25	10	0.4988	0.0317226	Right	Forewing	uns	wet	128.926	0.6015	2.3783	0.0336383	NA	NA	NA	NA	104	0.183408	large	wet	0.0152572	0.12352
221	131	moore	22-12-09	Ghana	2	Temp_12.1	Temp_1	22 C	75 % RH	Z. m. y	female	26	9	0.5399	0.0313183	Right	Forewing	uns	wet	142.988	0.5716	2.10415	0.0497542	NA	NA	NA	NA	104	0.223056	large	wet	0.0142366	0.119317
222	407	moore	22-12-10	Ghana	2	Temp_12.1	Temp_1	22 C	75 % RH	Z. m. y	male	26	8	0.5585	0.0316739	Left	Forewing	ups	wet	135.381	0.5035	1.2347	0.0253848	NA	NA	NA	NA	104	0.159326	large	wet	0.00813414	0.0901894
223	230	moore	22-12-11	Ghana	2	Temp_12.1	Temp_1	22 C	75 % RH	Z. m. y	male	26	10	0.5551	0.0316095	Left	Forewing	ups	wet	125.141	0.42515	1.54455	0.0378396	NA	NA	NA	NA	104	0.194524	large	wet	0.0225688	0.150229
224	364	moore	22-12-12	Ghana	2	Temp_12.1	Temp_1	22 C	75 % RH	Z. m. y	female	NA	NA	NA	NA	Left	Forewing	ups	wet	165.529	1.18815	4.07115	0.023602	NA	NA	NA	NA	104	0.153629	large	wet	0.0570668	0.238887
225	546	moore	22-18-01	Ghana	2	Temp_18.1	Temp_1	22 C	75 % RH	Z. m. y	male	25	11	0.349	0.0281623	Right	Forewing	uns	wet	92.1475	0.4502	1.4074	0.0288655	NA	NA	NA	NA	104	0.169898	large	wet	0.0114628	0.107064
226	335	moore	22-18-02	Ghana	2	Temp_18.1	Temp_1	22 C	75 % RH	Z. m. y	female	26	10	NA	NA	Right	Forewing	uns	wet	163.286	0.79225	2.69505	0.0238315	NA	NA	NA	NA	104	0.154375	large	wet	0.0210739	0.145168
227	199	moore	22-18-04	Ghana	2	Temp_18.1	Temp_1	22 C	75 % RH	Z. m. y	male	26	9	0.3659	0.0275094	Left	Forewing	ups	wet	104.057	0.3557	1.3087	0.0483645	NA	NA	NA	NA	104	0.219919	large	wet	0.0108572	0.104198
228	487	moore	22-18-06	Ghana	2	Temp_18.1	Temp_1	22 C	75 % RH	Z. m. y	female	26	9	0.4869	0.030258	Left	Forewing	ups	wet	143.561	0.88765	2.9234	0.0199567	NA	NA	NA	NA	104	0.141268	small	dry	0.0229501	0.151493
229	331	moore	22-18-07	Ghana	2	Temp_18.1	Temp_1	22 C	75 % RH	Z. m. y	female	26	10	0.5113	0.0307552	Right	Forewing	uns	wet	155.46	0.9512	3.27085	0.0271541	NA	NA	NA	NA	104	0.164785	large	wet	0.022682	0.150605
230	227	moore	22-22-01	Ghana	2	Temp_22.1	Temp_1	22 C	75 % RH	Z. m. y	male	19	10	0.4707	0.0409413	Left	Forewing	ups	wet	117.072	0.24585	0.5628	0.0400562	NA	NA	NA	NA	105	0.20014	large	wet	0.0037539	0.0612691
231	513	moore	22-22-02	Ghana	2	Temp_22.1	Temp_1	22 C	75 % RH	Z. m. y	male	20	9	0.3658	0.0357589	Right	Forewing	uns	wet	87.4111	0.25575	0.48685	0.0311748	NA	NA	NA	NA	105	0.176564	large	wet	0.00374744	0.0612163
232	150	moore	22-22-03	Ghana	2	Temp_22.1	Temp_1	22 C	75 % RH	Z. m. y	female	21	8	0.4296	0.035931	Right	Forewing	uns	wet	128.608	0.4003	1.34445	0.0464076	NA	NA	NA	NA	105	0.215424	large	wet	0.00973829	0.0986828
233	130	moore	22-22-04	Ghana	2	Temp_22.1	Temp_1	22 C	75 % RH	Z. m. y	male	23	9	0.485	0.0341601	Left	Forewing	ups	wet	113.628	0.2631	0.7216	0.0596915	NA	NA	NA	NA	105	0.244318	large	wet	0.00554015	0.0744322
234	157	moore	22-22-04(2)	Ghana	2	Temp_22.1	Temp_1	22 C	75 % RH	Z. m. y	male	NA	NA	0.453	NA	Left	Forewing	ups	wet	101.652	0.28255	0.6937	0.0525695	NA	NA	NA	NA	105	0.22928	large	wet	0.005321	0.0729452
235	172	moore	22-22-05	Ghana	2	Temp_22.1	Temp_1	22 C	75 % RH	Z. m. y	male	23	8	0.4197	0.0325526	Right	Forewing	uns	wet	97.7398	0.28895	0.66435	0.0526038	NA	NA	NA	NA	105	0.229355	large	wet	0.00551021	0.0742308
236	423	moore	22-22-05(2)	Ghana	2	Temp_22.1	Temp_1	22 C	75 % RH	Z. m. y	female	NA	NA	0.4586	NA	Left	Forewing	ups	wet	133.638	0.548	2.2243	0.0260413	NA	NA	NA	NA	105	0.161373	large	wet	0.017169	0.13103
237	178	moore	22-22-06	Ghana	2	Temp_22.1	Temp_1	22 C	75 % RH	Z. m. y	female	24	10	0.5244	0.0336003	Left	Forewing	ups	wet	140.923	0.87	2.90425	0.0365478	NA	NA	NA	NA	105	0.191175	large	wet	0.0200004	0.141423
238	139	moore	22-22-07	Ghana	2	Temp_22.1	Temp_1	22 C	75 % RH	Z. m. y	female	24	10	0.3654	0.0297882	Left	Forewing	ups	wet	96.9877	0.43585	1.38185	0.0636453	NA	NA	NA	NA	105	0.25228	large	wet	0.0087776	0.0936889
239	421	moore	22-22-08	Ghana	2	Temp_22.1	Temp_1	22 C	75 % RH	Z. m. y	female	24	10	0.4088	0.0309238	Right	Forewing	uns	wet	126.963	0.59485	2.22985	0.025972	NA	NA	NA	NA	105	0.161158	large	wet	0.0172956	0.131513
240	177	moore	22-22-09	Ghana	2	Temp_22.1	Temp_1	22 C	75 % RH	Z. m. y	female	24	9	0.5138	0.0333724	Left	Forewing	ups	wet	145.423	0.77545	2.71345	0.0368958	NA	NA	NA	NA	105	0.192083	large	wet	0.0211671	0.145489
241	373	moore	22-22-11	Ghana	2	Temp_22.1	Temp_1	22 C	75 % RH	Z. m. y	female	26	10	0.361	0.027386	Right	Forewing	uns	wet	118.531	0.9225	2.95475	0.0297445	NA	NA	NA	NA	105	0.172466	large	wet	0.0206644	0.143751
242	1	moore	22-22-14	Ghana	2	Temp_22.1	Temp_1	22 C	75 % RH	Z. m. y	female	NA	NA	NA	NA	Right	Forewing	uns	wet	142.694	0.88855	3.2664	0.0358911	NA	NA	NA	NA	105	0.189449	large	wet	0.0215419	0.146771
243	208	moore	22-22-15	Ghana	2	Temp_22.1	Temp_1	22 C	75 % RH	Z. m. y	male	NA	NA	NA	NA	Left	Forewing	ups	wet	116.483	0.4022	1.12585	0.0422077	NA	NA	NA	NA	105	0.205445	large	wet	0.00831616	0.091193
244	369	moore	22-27-01	Ghana	2	Temp_27.1	Temp_1	22 C	75 % RH	Z. m. y	male	22	10	0.4173	0.0339672	Right	Forewing	uns	wet	105.43	0.2797	0.8277	0.0377823	NA	NA	NA	NA	107	0.194377	large	wet	0.00571784	0.0756164
245	480	moore	22-27-02	Ghana	2	Temp_27.1	Temp_1	22 C	75 % RH	Z. m. y	male	24	10	NA	NA	Left	Forewing	ups	wet	96.3564	0.314	0.96395	0.0251876	NA	NA	NA	NA	107	0.158706	large	wet	0.0077029	0.0877662
246	124	moore	22-27-03	Ghana	2	Temp_27.1	Temp_1	22 C	75 % RH	Z. m. y	female	24	10	0.3758	0.0300682	Right	Forewing	uns	wet	118.119	0.47465	1.7862	0.0677096	NA	NA	NA	NA	107	0.260211	large	wet	0.0143879	0.119949
247	203	moore	22-27-04	Ghana	2	Temp_27.1	Temp_1	22 C	75 % RH	Z. m. y	female	24	9	0.4355	0.0315829	Left	Forewing	ups	wet	135.009	0.538	1.89095	0.0343041	NA	NA	NA	NA	107	0.185214	large	wet	0.0114236	0.106881
248	450	moore	22-27-08	Ghana	2	Temp_27.1	Temp_1	22 C	75 % RH	Z. m. y	male	23	9	0.448	0.0332684	Right	Forewing	uns	wet	108.752	0.31775	0.8711	0.0302949	NA	NA	NA	NA	107	0.174054	large	wet	0.00514277	0.0717131
249	467	moore	22-27-09	Ghana	2	Temp_27.1	Temp_1	22 C	75 % RH	Z. m. y	male	23	10	0.429	0.0327912	Right	Forewing	uns	wet	120.192	0.4129	0.98445	0.0246919	NA	NA	NA	NA	107	0.157137	large	wet	0.0106834	0.103361
250	268	moore	22-27-10	Ghana	2	Temp_27.1	Temp_1	22 C	75 % RH	Z. m. y	female	NA	NA	NA	NA	Left	Forewing	ups	wet	143.428	0.7385	2.4169	0.0295572	NA	NA	NA	NA	107	0.171922	large	wet	0.0264629	0.162674
251	549	moore	22-27-10(2)	Ghana	2	Temp_27.1	Temp_1	22 C	75 % RH	Z. m. y	female	NA	NA	NA	NA	Right	Forewing	uns	wet	137.175	0.7376	2.63585	0.0154647	NA	NA	NA	NA	107	0.124357	small	dry	0.0161425	0.127053
252	425	moore	22-27-12	Ghana	2	Temp_27.1	Temp_1	22 C	75 % RH	Z. m. y	female	26	9	0.4988	0.0305025	Right	Forewing	uns	wet	150.602	0.8917	3.03765	0.0221791	NA	NA	NA	NA	107	0.148926	small	dry	0.0185687	0.136267
253	673	moore	22-27-15	Ghana	2	Temp_27.1	Temp_1	22 C	75 % RH	Z. m. y	female	38	9	0.2814	0.0172448	Left	Forewing	ups	int	95.4767	0.6367	2.70395	0.0117317	NA	NA	NA	NA	107	0.108313	small	dry	0.0259853	0.1612
254	396	moore	22-27-16a	Ghana	2	Temp_27.1	Temp_1	22 C	75 % RH	Z. m. y	female	43	NA	NA	NA	Left	Forewing	ups	wet	115.866	0.76535	2.93072	0.0236115	NA	NA	NA	NA	107	0.15366	large	wet	0.0275321	0.165928
255	248	moore	22-36-01	Ghana	2	moore_36.1	Temp_1	22 C	75 % RH	Z. m. y	female	22	10	0.5229	0.0366199	Left	Forewing	ups	wet	123.713	0.62185	1.865	0.0381202	NA	NA	NA	NA	108	0.195244	large	wet	0.012991	0.113978
256	245	moore	22-36-02	Ghana	2	moore_36.1	Temp_1	22 C	75 % RH	Z. m. y	male	23	9	0.416	0.0324566	Right	Forewing	uns	wet	91.1651	0.12425	0.4139	0.0528946	NA	NA	NA	NA	108	0.229988	large	wet	0.00283352	0.0532308
257	119	moore	22-36-03	Ghana	2	moore_36.1	Temp_1	22 C	75 % RH	Z. m. y	female	23	9	0.5238	0.0350478	Left	Forewing	ups	wet	138.484	0.66945	2.16505	0.0605672	NA	NA	NA	NA	108	0.246104	large	wet	0.0139267	0.118012
258	126	moore	22-36-04	Ghana	2	moore_36.1	Temp_1	22 C	75 % RH	Z. m. y	female	23	10	0.4617	0.0336041	Right	Forewing	uns	wet	131.869	0.7178	2.5312	0.0579217	NA	NA	NA	NA	108	0.240669	large	wet	0.0166672	0.129102
259	133	moore	22-36-05	Ghana	2	moore_36.1	Temp_1	22 C	75 % RH	Z. m. y	female	22	8	0.5326	0.0368449	Right	Forewing	uns	wet	147.844	0.8132	2.6189	0.0453667	NA	NA	NA	NA	108	0.212995	large	wet	0.02237	0.149566
260	570	moore	22-36-06	Ghana	2	moore_36.1	Temp_1	22 C	75 % RH	Z. m. y	male	23	10	0.4702	0.0338091	Right	Forewing	uns	wet	110.471	0.28755	0.8878	0.0190952	NA	NA	NA	NA	108	0.138185	small	dry	0.00760097	0.0871836
261	381	moore	22-36-08	Ghana	2	moore_36.1	Temp_1	22 C	75 % RH	Z. m. y	male	23	10	0.417	0.0324826	Left	Forewing	ups	wet	98.7896	0.3313	1.0029	0.0382968	NA	NA	NA	NA	108	0.195696	large	wet	0.0114734	0.107114
262	241	moore	22-36-09	Ghana	2	moore_36.1	Temp_1	22 C	75 % RH	Z. m. y	female	25	9	0.3524	0.0282535	Right	Forewing	uns	wet	110.813	0.5266	2.09555	0.0387046	NA	NA	NA	NA	108	0.196735	large	wet	0.0243491	0.156042
263	257	moore	22-36-10	Ghana	2	moore_36.1	Temp_1	22 C	75 % RH	Z. m. y	male	26	9	0.4242	0.028899	Right	Forewing	uns	wet	109.069	0.27505	0.6696	0.0417989	NA	NA	NA	NA	108	0.204448	large	wet	0.00520654	0.0721563
264	386	moore	22-36-11	Ghana	2	moore_36.1	Temp_1	22 C	75 % RH	Z. m. y	female	26	9	0.3796	0.0278485	Left	Forewing	ups	wet	104.678	0.5931	2.19075	0.0314072	NA	NA	NA	NA	108	0.177221	large	wet	0.0166027	0.128851
265	330	moore	22-36-12	Ghana	2	moore_36.1	Temp_1	22 C	75 % RH	Z. m. y	female	26	9	0.452	0.029517	Left	Forewing	ups	wet	129.164	0.6683	2.4389	0.0320885	NA	NA	NA	NA	108	0.179133	large	wet	0.0214639	0.146506
266	541	moore	22-36-14	Ghana	2	moore_36.1	Temp_1	22 C	75 % RH	Z. m. y	male	NA	NA	NA	NA	Left	Forewing	ups	wet	79.1883	0.1636	0.6186	0.0435026	NA	NA	NA	NA	108	0.208573	large	wet	0.00515346	0.0717876
267	171	moore	22-36-15	Ghana	2	moore_36.1	Temp_1	22 C	75 % RH	Z. m. y	female	NA	NA	NA	NA	Right	Forewing	uns	wet	108.164	0.49955	2.00345	0.0451505	NA	NA	NA	NA	108	0.212487	large	wet	0.019709	0.140389
268	226	moore	22-36-16	Ghana	2	moore_36.1	Temp_1	22 C	75 % RH	Z. m. y	female	NA	NA	NA	NA	Right	Forewing	uns	wet	122.562	0.6934	2.51215	0.0391696	NA	NA	NA	NA	108	0.197913	large	wet	0.026805	0.163722
269	481	moore	22-36-17	Ghana	2	moore_36.1	Temp_1	22 C	75 % RH	Z. m. y	female	28	10	0.3612	0.0254346	Left	Forewing	ups	wet	112.638	0.48175	1.79095	0.0245231	NA	NA	NA	NA	108	0.156599	large	wet	0.0183237	0.135365
270	251	moore	22-36-20	Ghana	2	moore_36.1	Temp_1	22 C	75 % RH	Z. m. y	male	28	10	0.5098	0.0285304	Left	Forewing	ups	wet	111.859	0.3683	1.2935	0.0396379	NA	NA	NA	NA	108	0.199093	large	wet	0.0121481	0.110218
271	434	moore	22-44-01	Ghana	2	moore_44.1	Temp_1	22 C	75 % RH	Z. m. y	male	NA	NA	NA	NA	Left	Forewing	ups	wet	104.187	0.28425	0.5554	0.0270985	NA	NA	NA	NA	108	0.164616	large	wet	0.00415601	0.0644671
272	204	moore	22-44-02	Ghana	2	moore_44.1	Temp_1	22 C	75 % RH	Z. m. y	female	25	9	0.5244	0.0322563	Left	Forewing	ups	wet	144.572	0.5932	1.98335	0.034195	NA	NA	NA	NA	108	0.184919	large	wet	0.0143755	0.119898
273	253	moore	22-44-03	Ghana	2	moore_44.1	Temp_1	22 C	75 % RH	Z. m. y	male	25	10	0.4389	0.0303982	Left	Forewing	ups	wet	107.541	0.34095	0.91485	0.0432453	NA	NA	NA	NA	108	0.207955	large	wet	0.00649187	0.0805721
274	348	moore	22-44-04	Ghana	2	moore_44.1	Temp_1	22 C	75 % RH	Z. m. y	male	25	9	0.4938	0.0316162	Right	Forewing	uns	wet	117.042	0.34005	1.22155	0.0352608	NA	NA	NA	NA	108	0.187779	large	wet	0.00812308	0.0901281
275	438	moore	22-44-05	Ghana	2	moore_44.1	Temp_1	22 C	75 % RH	Z. m. y	female	25	9	0.4224	0.0300124	Left	Forewing	ups	wet	128.191	0.57865	1.9332	0.0236976	NA	NA	NA	NA	108	0.15394	large	wet	0.0199324	0.141182
276	341	moore	22-44-06	Ghana	2	moore_44.1	Temp_1	22 C	75 % RH	Z. m. y	female	25	9	0.4858	0.0314446	Left	Forewing	ups	wet	142.798	0.53065	1.72995	0.0278342	NA	NA	NA	NA	108	0.166836	large	wet	0.0170865	0.130715
277	349	moore	22-44-07	Ghana	2	moore_44.1	Temp_1	22 C	75 % RH	Z. m. y	male	25	10	0.4994	0.0317353	Left	Forewing	ups	wet	117.454	0.4291	1.1611	0.033915	NA	NA	NA	NA	108	0.18416	large	wet	0.00914522	0.0956306
278	136	moore	22-44-09	Ghana	2	moore_44.1	Temp_1	22 C	75 % RH	Z. m. y	male	25	10	0.4564	0.030797	Left	Forewing	ups	wet	106.087	0.17835	0.153755	0.0608725	NA	NA	NA	NA	108	0.246724	large	wet	0.00117343	0.0342553
279	162	moore	22-44-10	Ghana	2	moore_44.1	Temp_1	22 C	75 % RH	Z. m. y	female	25	10	0.4749	0.0312076	Left	Forewing	ups	wet	132.922	0.6291	2.2836	0.0429093	NA	NA	NA	NA	108	0.207146	large	wet	0.0157031	0.125312
280	353	moore	22-44-11	Ghana	2	moore_44.1	Temp_1	22 C	75 % RH	Z. m. y	male	25	10	0.4553	0.0307722	Right	Forewing	uns	wet	110.506	0.2904	0.90805	0.0360388	NA	NA	NA	NA	108	0.189839	large	wet	0.00629701	0.0793537
281	275	moore	22-44-13	Ghana	2	moore_44.1	Temp_1	22 C	75 % RH	Z. m. y	female	27	9	0.4429	0.0282318	Right	Forewing	uns	wet	119.636	0.47245	1.58445	0.0326915	NA	NA	NA	NA	108	0.180808	large	wet	0.0133674	0.115617
282	235	moore	22-44-14	Ghana	2	moore_44.1	Temp_1	22 C	75 % RH	Z. m. y	female	27	10	0.3766	0.0267463	Right	Forewing	uns	wet	117.342	0.5621	2.025	0.0410688	NA	NA	NA	NA	108	0.202654	large	wet	0.0167994	0.129613
283	564	moore	22-44-15	Ghana	2	moore_44.1	Temp_1	22 C	75 % RH	Z. m. y	female	27	10	0.4809	0.0290171	Left	Forewing	ups	wet	142.195	0.68855	2.7434	0.0150986	NA	NA	NA	NA	108	0.122877	small	dry	0.0219142	0.148034
284	655	moore	22-44-16	Ghana	2	moore_44.1	Temp_1	22 C	75 % RH	Z. m. y	male	27	10	0.4012	0.0273164	Right	Forewing	uns	wet	106.172	0.29015	0.81005	0.00962071	NA	NA	NA	NA	108	0.0980852	small	dry	0.00567683	0.0753448
285	496	moore	22-44-17	Ghana	2	moore_44.1	Temp_1	22 C	75 % RH	Z. m. y	female	28	10	0.3459	0.0250703	Right	Forewing	uns	wet	115.281	0.57565	2.07585	0.0271875	NA	NA	NA	NA	108	0.164886	large	wet	0.0147408	0.121412
286	333	moore	22-44-18	Ghana	2	moore_44.1	Temp_1	22 C	75 % RH	Z. m. y	female	27	10	0.3391	0.0258273	Left	Forewing	ups	wet	95.7464	0.55315	1.89355	0.0428062	NA	NA	NA	NA	108	0.206897	large	wet	0.016256	0.127499
287	282	moore	22-44-19	Ghana	2	moore_44.1	Temp_1	22 C	75 % RH	Z. m. y	female	33	9	0.3985	0.0222995	Left	Forewing	ups	wet	117.649	0.6682	2.43485	0.0361354	NA	NA	NA	NA	108	0.190093	large	wet	0.0194343	0.139407
288	2089	moll	1	India	2	moll_3	Plant_2	24 C	69 % RH	A. c.	male	29	12	0.5419	0.0281131	Left	Forewing	uns	dry	NA	NA	NA	NA	1	0.02026	d	1	2016-09-19	NA	NA	dry	NA	NA
289	2117	moll	2	India	2	moll_3	Plant_2	24 C	69 % RH	A. c.	female	29	10	0.4608	0.0266342	Left	Forewing	uns	dry	NA	NA	NA	NA	1	0.02026	d	1	2016-09-19	NA	NA	dry	NA	NA
290	2159	moll	4	India	2	moll_4	Plant_2	24 C	69 % RH	Z. m. y	female	28	9	0.3659	0.0255444	Left	Forewing	uns	dry	NA	NA	NA	NA	2	0.04792	i	1	2016-09-20	NA	NA	dry	NA	NA
291	2301	moll	6	India	2	moll_4	Plant_2	24 C	69 % RH	Z. m. y	female	28	8	0.3883	0.0260554	Left	Forewing	uns	int	NA	NA	NA	NA	2	0.04792	d	2	2016-09-20	NA	NA	wet	NA	NA
292	2503	moll	7	India	2	moll_4	Plant_2	24 C	69 % RH	Z. m. y	female	28	8	0.3977	0.026264	Left	Forewing	uns	dry	NA	NA	NA	NA	1	0.02026	d	1	2016-09-20	NA	NA	dry	NA	NA
293	2681	moll	8	India	2	moll_4	Plant_2	24 C	69 % RH	Z. m. y	male	28	9	0.4357	0.0270752	Left	Forewing	uns	dry	NA	NA	NA	NA	1	0.02026	d	0	2016-09-20	NA	NA	dry	NA	NA
294	2883	moll	9	India	2	moll_4	Plant_2	24 C	69 % RH	Z. m. y	male	28	8	0.3999	0.0263123	Left	Forewing	uns	dry	NA	NA	NA	NA	1	0.02026	d	1	2016-09-20	NA	NA	dry	NA	NA
295	2091	moll	10	India	2	moll_1	Plant_2	24 C	69 % RH	B. mu.	male	36	13	0.38604	0.0202259	Left	Forewing	uns	dry	NA	NA	NA	NA	1	0.02026	d	0	2016-09-19	NA	NA	dry	NA	NA
296	2095	moll	11.1	India	2	moll_9	Plant_2	24 C	69 % RH	B. mi.	male	26	9	0.3881	0.0280548	Left	Forewing	uns	int	NA	NA	NA	NA	3	0.07433	w	2	2016-10-09	NA	NA	wet	NA	NA
297	2115	moll	19	India	2	moll_1	Plant_2	24 C	69 % RH	B. mu.	female	39	10	NA	NA	Left	Forewing	uns	dry	NA	NA	NA	NA	1	0.02026	d	1	2016-09-19	NA	NA	dry	NA	NA
298	2119	moll	20	India	2	moll_13	Plant_2	24 C	69 % RH	A. c.	female	27	10	0.4601	0.0285926	Left	Forewing	uns	wet	NA	NA	NA	NA	4	0.09885	w	4	2016-10-10	NA	NA	wet	NA	NA
299	2121	moll	21	India	2	moll_13	Plant_2	24 C	69 % RH	A. c.	female	27	9	0.4362	0.0280887	Left	Forewing	uns	dry	NA	NA	NA	NA	1	0.02026	d	2	2016-10-10	NA	NA	dry	NA	NA
300	2123	moll	22	India	2	moll_14	Plant_2	24 C	69 % RH	B. mi.	male	26	10	0.3729	0.0276837	Left	Forewing	uns	int	NA	NA	NA	NA	3	0.07433	w	2	2016-10-11	NA	NA	wet	NA	NA
301	2125	moll	23	India	2	moll_14	Plant_2	24 C	69 % RH	B. mi.	male	26	9	0.3907	0.0281174	Left	Forewing	uns	int	NA	NA	NA	NA	2	0.04792	w	2	2016-10-11	NA	NA	wet	NA	NA
302	2127	moll	24	India	2	moll_14	Plant_2	24 C	69 % RH	B. mi.	male	26	8	0.3375	0.0267784	Left	Forewing	uns	dry	NA	NA	NA	NA	1	0.02026	d	2	2016-10-11	NA	NA	dry	NA	NA
303	2129	moll	25	India	2	moll_28	Plant_2	24 C	69 % RH	Z. m. y	female	24	8	0.3987	0.030667	Left	Forewing	uns	wet	NA	NA	NA	NA	4	0.09885	w	4	2016-10-13	NA	NA	wet	NA	NA
304	2131	moll	26.1	India	2	moll_19	Plant_2	24 C	69 % RH	B. mu.	male	26	9	0.4427	0.0293132	Left	Forewing	uns	int	NA	NA	NA	NA	3	0.07433	w	3	2016-10-11	NA	NA	wet	NA	NA
305	2133	moll	26.2	India	2	moll_39.5	Plant_2	24 C	69 % RH	B. mu.	female	21	9	NA	NA	Left	Forewing	uns	wet	NA	NA	NA	NA	3	0.07433	w	3	2016-10-16	NA	NA	wet	NA	NA
306	2135	moll	27	India	2	moll_39	Plant_2	24 C	69 % RH	C. f.	male	22	8	0.4872	0.0357668	Left	Forewing	uns	wet	NA	NA	NA	NA	3	0.07433	w	4	2016-10-15	NA	NA	wet	NA	NA
307	2137	moll	28	India	2	moll_9	Plant_2	24 C	69 % RH	B. mi.	male	28	8	0.3889	0.0260688	Left	Forewing	uns	int	NA	NA	NA	NA	2	0.04792	i	2	2016-10-09	NA	NA	wet	NA	NA
308	2139	moll	29	India	2	moll_9	Plant_2	24 C	69 % RH	B. mi.	female	29	8	0.3802	0.0249808	Left	Forewing	uns	wet	NA	NA	NA	NA	3	0.07433	w	4	2016-10-09	NA	NA	wet	NA	NA
309	2141	moll	30	India	2	moll_9	Plant_2	24 C	69 % RH	B. mi.	female	29	8	0.3763	0.0248951	Left	Forewing	uns	wet	NA	NA	NA	NA	3	0.07433	w	3	2016-10-09	NA	NA	wet	NA	NA
310	2143	moll	31	India	2	moll_9	Plant_2	24 C	69 % RH	B. mi.	female	29	8	0.3824	0.0250289	Left	Forewing	uns	wet	NA	NA	NA	NA	4	0.09885	w	4	2016-10-09	NA	NA	wet	NA	NA
311	2145	moll	32	India	2	moll_9	Plant_2	24 C	69 % RH	B. mi.	female	29	9	0.4596	0.0266111	Left	Forewing	uns	int	NA	NA	NA	NA	2	0.04792	i	2	2016-10-09	NA	NA	wet	NA	NA
312	2147	moll	33	India	2	moll_22	Plant_2	24 C	69 % RH	A. c.	female	26	8	0.3757	0.0277528	Left	Forewing	uns	wet	NA	NA	NA	NA	3	0.07433	w	3	2016-10-12	NA	NA	wet	NA	NA
313	2149	moll	34	India	2	moll_22	Plant_2	24 C	69 % RH	A. c.	female	26	8	0.4109	0.0285938	Left	Forewing	uns	wet	NA	NA	NA	NA	3	0.07433	w	3	2016-10-12	NA	NA	wet	NA	NA
314	2151	moll	36	India	2	moll_22	Plant_2	24 C	69 % RH	A. c.	female	26	9	0.4354	0.0291512	Left	Forewing	uns	int	NA	NA	NA	NA	2	0.04792	d	2	2016-10-12	NA	NA	wet	NA	NA
315	2153	moll	37	India	2	moll_19	Plant_2	24 C	69 % RH	B. mu.	male	27	8	0.36	0.0263474	Left	Forewing	uns	wet	NA	NA	NA	NA	3	0.07433	w	3	2016-10-11	NA	NA	wet	NA	NA
316	2155	moll	38	India	2	moll_16	Plant_2	24 C	69 % RH	Z. m. o	male	27	NA	0.325	0.0254642	Left	Forewing	uns	wet	NA	NA	NA	NA	NA	NA	NA	NA	2016-10-11	NA	NA	wet	NA	NA
317	2157	moll	39	India	2	moll_18	Plant_2	24 C	69 % RH	S. b.	female	27	8	0.4816	0.0290312	Left	Forewing	uns	int	NA	NA	NA	NA	2	0.04792	w	3	2016-10-11	NA	NA	wet	NA	NA
318	2299	moll	59	India	2	moll_15	Plant_2	24 C	69 % RH	S. b.	female	29	9	0.3014	0.0231197	Left	Forewing	uns	int	NA	NA	NA	NA	2	0.04792	i	2	2016-10-11	NA	NA	wet	NA	NA
319	2303	moll	60	India	2	moll_15	Plant_2	24 C	69 % RH	S. b.	male	29	9	0.4075	0.0255649	Left	Forewing	uns	int	NA	NA	NA	NA	3	0.07433	d	3	2016-10-11	NA	NA	wet	NA	NA
320	2323	moll	61	India	2	moll_13	Plant_2	24 C	69 % RH	A. c.	female	29	9	0.4567	0.026555	Left	Forewing	uns	wet	NA	NA	NA	NA	4	0.09885	w	4	2016-10-10	NA	NA	wet	NA	NA
321	2341	moll	62	India	2	moll_11	Plant_2	24 C	69 % RH	C. d.	male	30	9	0.2701	0.021547	Left	Forewing	uns	int	NA	NA	NA	NA	3	0.07433	w	2	2016-10-10	NA	NA	wet	NA	NA
322	2357	moll	63	India	2	moll_16	Plant_2	24 C	69 % RH	Z. m. o	female	28	9	0.4561	0.0274913	Left	Forewing	uns	wet	NA	NA	NA	NA	4	0.09885	w	4	2016-10-11	NA	NA	wet	NA	NA
323	2379	moll	64	India	2	moll_30	Plant_2	24 C	69 % RH	A. c.	female	27	9	0.4374	0.0281144	Left	Forewing	uns	wet	NA	NA	NA	NA	3	0.07433	w	4	2016-10-13	NA	NA	wet	NA	NA
324	2401	moll	65	India	2	moll_13	Plant_2	24 C	69 % RH	A. c.	male	30	9	0.4508	0.0255588	Left	Forewing	uns	wet	NA	NA	NA	NA	4	0.09885	w	3	2016-10-10	NA	NA	wet	NA	NA
325	2659	moll	79	India	2	moll_16	Plant_2	24 C	69 % RH	Z. m. o	female	30	8	0.3669	0.0238632	Left	Forewing	uns	wet	NA	NA	NA	NA	NA	NA	NA	NA	2016-10-11	NA	NA	wet	NA	NA
326	2683	moll	80	India	2	moll_40	Plant_2	24 C	69 % RH	Z. m. y	female	25	6	0.3918	0.0292695	Left	Forewing	uns	wet	NA	NA	NA	NA	4	0.09885	w	4	2016-10-16	NA	NA	wet	NA	NA
327	2703	moll	81	India	2	moll_16	Plant_2	24 C	69 % RH	Z. m. o	female	30	9	0.4392	0.0253376	Left	Forewing	uns	int	NA	NA	NA	NA	3	0.07433	i	2	2016-10-11	NA	NA	wet	NA	NA
328	2725	moll	82	India	2	moll_19	Plant_2	24 C	69 % RH	B. mu.	female	30	7	0.4267	0.0250949	Left	Forewing	uns	wet	NA	NA	NA	NA	4	0.09885	d	4	2016-10-11	NA	NA	wet	NA	NA
329	2747	moll	83	India	2	moll_9	Plant_2	24 C	69 % RH	B. mi.	female	32	8	0.3782	0.0225991	Left	Forewing	uns	wet	NA	NA	NA	NA	3	0.07433	d	4	2016-10-09	NA	NA	wet	NA	NA
330	2779	moll	85	India	2	moll_39.5	Plant_2	24 C	69 % RH	B. mu.	female	26	8	0.5151	0.0308312	Left	Forewing	uns	wet	NA	NA	NA	NA	3	0.07433	w	4	2016-10-16	NA	NA	wet	NA	NA
331	2797	moll	86	India	2	moll_31	Plant_2	24 C	69 % RH	S. b.	male	29	8	0.3704	0.0247643	Left	Forewing	uns	dry	NA	NA	NA	NA	1	0.02026	d	2	2016-10-13	NA	NA	dry	NA	NA
332	2817	moll	87	India	2	moll_11	Plant_2	24 C	69 % RH	C. d.	male	32	8	0.3571	0.0221707	Left	Forewing	uns	int	NA	NA	NA	NA	2	0.04792	d	2	2016-10-10	NA	NA	wet	NA	NA
333	2839	moll	88	India	2	moll_27	Plant_2	24 C	69 % RH	C. d.	male	30	8	0.3022	0.0223688	Left	Forewing	uns	int	NA	NA	NA	NA	3	0.07433	d	2	2016-10-12	NA	NA	wet	NA	NA
334	2861	moll	89	India	2	moll_30	Plant_2	24 C	69 % RH	A. c.	female	29	8	0.49	0.0271853	Left	Forewing	uns	wet	NA	NA	NA	NA	4	0.09885	w	4	2016-10-13	NA	NA	wet	NA	NA
335	2887	moll	91	India	2	moll_11	Plant_2	24 C	69 % RH	C. d.	male	31	NA	0.3284	0.0222556	Left	Forewing	uns	int	NA	NA	NA	NA	2	0.04792	d	2	2016-10-12	NA	NA	wet	NA	NA
336	2889	moll	92	India	2	moll_40	Plant_2	24 C	69 % RH	Z. m. y	male	27	9	0.2957	0.0246748	Left	Forewing	uns	int	NA	NA	NA	NA	2	0.04792	w	2	2016-10-16	NA	NA	wet	NA	NA
337	2891	moll	93	India	2	moll_37	Plant_2	24 C	69 % RH	Z. m. o	female	29	NA	0.338	0.0240201	Left	Forewing	uns	dry	NA	NA	NA	NA	NA	NA	NA	NA	2016-10-14	NA	NA	dry	NA	NA
338	2893	moll	94	India	2	moll_35	Plant_2	24 C	69 % RH	Z. m. y	female	29	9	0.3876	0.0251418	Left	Forewing	uns	wet	NA	NA	NA	NA	4	0.09885	w	4	2016-10-14	NA	NA	wet	NA	NA
339	2895	moll	95	India	2	moll_31	Plant_2	24 C	69 % RH	S. b.	male	29	8	0.236	0.0213095	Left	Forewing	uns	int	NA	NA	NA	NA	2	0.04792	w	3	2016-10-13	NA	NA	wet	NA	NA
340	2897	moll	96	India	2	moll_16	Plant_2	24 C	69 % RH	Z. m. o	female	32	NA	0.2888	0.0206561	Left	Forewing	uns	int	NA	NA	NA	NA	2	0.04792	d	2	2016-10-11	NA	NA	wet	NA	NA
341	2899	moll	97	India	2	moll_14	Plant_2	24 C	69 % RH	B. mi.	female	32	7	0.4289	0.0235669	Left	Forewing	uns	wet	NA	NA	NA	NA	3	0.07433	w	3	2016-10-11	NA	NA	wet	NA	NA
342	2901	moll	98	India	2	moll_18	Plant_2	24 C	69 % RH	S. b.	female	32	7	0.4216	0.0234324	Left	Forewing	uns	wet	NA	NA	NA	NA	4	0.09885	w	4	2016-10-11	NA	NA	wet	NA	NA
343	2093	moll	109	India	2	moll_39	Plant_2	24 C	69 % RH	C. f.	female	31	10	0.4656	0.0250021	Left	Forewing	uns	dry	NA	NA	NA	NA	1	0.02026	d	2	2016-10-15	NA	NA	dry	NA	NA
344	2097	moll	110	India	2	moll_27	Plant_2	24 C	69 % RH	C. d.	female	35	8	0.291	0.0189334	Left	Forewing	uns	int	NA	NA	NA	NA	2	0.04792	d	3	2016-10-12	NA	NA	wet	NA	NA
345	2099	moll	111	India	2	moll_11	Plant_2	24 C	69 % RH	C. d.	male	37	7	0.3288	0.0186542	Left	Forewing	uns	int	NA	NA	NA	NA	3	0.07433	d	2	2016-10-10	NA	NA	wet	NA	NA
346	2101	moll	112	India	2	moll_20	Plant_2	24 C	69 % RH	B. mi.	female	35	9	0.3761	0.0206237	Left	Forewing	uns	int	NA	NA	NA	NA	3	0.07433	d	2	2016-10-12	NA	NA	wet	NA	NA
347	2103	moll	113	India	2	moll_31	Plant_2	24 C	69 % RH	S. b.	male	34	8	0.2649	0.0188893	Left	Forewing	uns	int	NA	NA	NA	NA	NA	NA	NA	NA	2016-10-13	NA	NA	wet	NA	NA
348	2105	moll	114	India	2	moll_17	Plant_2	24 C	69 % RH	O. c.	male	35	8	0.3161	0.0194629	Left	Forewing	uns	int	NA	NA	NA	NA	3	0.07433	d	3	2016-10-11	NA	NA	wet	NA	NA
349	2107	moll	121	India	2	moll_15	Plant_2	24 C	69 % RH	S. b.	male	37	8	0.2232	0.0163944	Left	Forewing	uns	dry	NA	NA	NA	NA	1	0.02026	w	1	2016-10-11	NA	NA	dry	NA	NA
350	2109	moll	122	India	2	moll_20	Plant_2	24 C	69 % RH	B. mi.	male	36	8	0.4236	0.0208617	Left	Forewing	uns	dry	NA	NA	NA	NA	1	0.02026	d	1	2016-10-12	NA	NA	dry	NA	NA
351	2111	moll	162	India	2	moll_20	Plant_2	24 C	69 % RH	B. mi.	male	39	10	0.4132	0.019098	Left	Forewing	uns	dry	NA	NA	NA	NA	1	0.02026	d	1	2016-10-12	NA	NA	dry	NA	NA
352	2113	moll	163	India	2	moll_17	Plant_2	24 C	69 % RH	O. c.	female	38	7	0.3156	0.0179169	Left	Forewing	uns	int	NA	NA	NA	NA	3	0.07433	d	2	2016-10-11	NA	NA	wet	NA	NA
353	2161	moll	441	India	2	moll_55	Plant_3	24 C	69 % RH	S. b.	male	22	8	0.3628	0.032419	Left	Forewing	uns	dry	NA	NA	NA	0.0126006	1	0.02026	d	0	2016-12-14	0.112252	small	dry	NA	NA
354	2163	moll	442	India	2	moll_55	Plant_3	24 C	69 % RH	S. b.	male	22	8	0.3776	0.032854	Left	Forewing	uns	dry	NA	NA	NA	NA	1	0.02026	d	2	2016-12-14	NA	NA	dry	NA	NA
355	2165	moll	443	India	2	moll_55	Plant_3	24 C	69 % RH	S. b.	male	22	7	0.3767	0.0328279	Left	Forewing	uns	wet	NA	NA	NA	NA	3	0.07433	w	3	2016-12-14	NA	NA	wet	NA	NA
356	2167	moll	444	India	2	moll_64	Plant_3	24 C	69 % RH	E. i.	female	21	7	0.4437	0.0363198	Left	Forewing	uns	wet	NA	NA	NA	NA	4	0.09885	d	4	2016-12-15	NA	NA	wet	NA	NA
357	2169	moll	446	India	2	moll_62	Plant_3	24 C	69 % RH	E. i.	male	21	8	0.4824	0.0373465	Left	Forewing	uns	int	NA	NA	NA	NA	2	0.04792	w	4	2016-12-14	NA	NA	wet	NA	NA
358	2171	moll	449	India	2	moll_93	Plant_3	24 C	69 % RH	S. b.	male	20	8	0.3845	0.0363582	Left	Forewing	uns	wet	NA	NA	NA	0.0813857	4	0.09885	w	4	2016-12-18	0.285282	large	wet	NA	NA
359	2173	moll	450	India	2	moll_64	Plant_3	24 C	69 % RH	E. i.	male	23	9	0.4332	0.0328979	Left	Forewing	uns	dry	NA	NA	NA	NA	1	0.02026	d	1	2016-12-15	NA	NA	dry	NA	NA
360	2175	moll	451	India	2	moll_64	Plant_3	24 C	69 % RH	E. i.	male	23	8	0.4483	0.0332758	Left	Forewing	uns	wet	NA	NA	NA	0.0641777	3	0.07433	w	4	2016-12-15	0.253333	large	wet	NA	NA
361	2177	moll	452	India	2	moll_58	Plant_3	24 C	69 % RH	R. c.	male	24	10	0.4918	0.0328891	Left	Forewing	uns	dry	NA	NA	NA	NA	1	0.02026	d	0	2016-12-14	NA	NA	dry	NA	NA
362	2179	moll	453	India	2	moll_60	Plant_3	24 C	69 % RH	C. d.	male	24	10	0.3971	0.0306259	Left	Forewing	uns	dry	102.456	NA	NA	0.0124649	1	0.02026	d	0	2016-12-14	0.111646	small	dry	NA	NA
363	2181	moll	454	India	2	moll_55	Plant_3	24 C	69 % RH	S. b.	male	25	9	0.4125	0.0297761	Left	Forewing	uns	int	NA	NA	NA	NA	2	0.04792	d	3	2016-12-14	NA	NA	wet	NA	NA
364	2183	moll	456	India	2	moll_104	Plant_3	24 C	69 % RH	E. i.	male	20	6	0.4094	0.0371267	Left	Forewing	uns	wet	NA	NA	NA	NA	4	0.09885	w	4	2016-12-19	NA	NA	wet	NA	NA
365	2185	moll	458	India	2	moll_62	Plant_3	24 C	69 % RH	E. i.	female	25	9	0.3611	0.0284841	Left	Forewing	uns	wet	NA	NA	NA	NA	3	0.07433	d	4	2016-12-14	NA	NA	wet	NA	NA
366	2187	moll	459	India	2	moll_74	Plant_3	24 C	69 % RH	S. b.	female	25	9	0.4567	0.0308038	Left	Forewing	uns	wet	NA	NA	NA	0.0788207	4	0.09885	w	4	2016-12-15	0.28075	large	wet	NA	NA
367	2189	moll	461	India	2	moll_74	Plant_3	24 C	69 % RH	S. b.	female	24	10	0.3907	0.0304605	Left	Forewing	uns	int	NA	NA	NA	NA	2	0.04792	d	3	2016-12-15	NA	NA	wet	NA	NA
368	2191	moll	462	India	2	moll_82	Plant_3	24 C	69 % RH	S. b.	female	22	8	0.3807	0.0329436	Left	Forewing	uns	wet	NA	NA	NA	NA	4	0.09885	w	4	2016-12-18	NA	NA	wet	NA	NA
369	2193	moll	463	India	2	moll_82	Plant_3	24 C	69 % RH	S. b.	male	22	9	0.3764	0.0328191	Left	Forewing	uns	int	NA	NA	NA	NA	2	0.04792	w	2	2016-12-18	NA	NA	wet	NA	NA
370	2195	moll	464	India	2	moll_64	Plant_3	24 C	69 % RH	E. i.	female	25	10	0.4699	0.0310977	Left	Forewing	uns	dry	NA	NA	NA	NA	1	0.02026	d	0	2016-12-15	NA	NA	dry	NA	NA
371	2197	moll	465	India	2	moll_55	Plant_3	24 C	69 % RH	S. b.	male	27	8	0.3063	0.0249662	Left	Forewing	uns	int	NA	NA	NA	NA	1	0.02026	w	3	2016-12-14	NA	NA	wet	NA	NA
372	2199	moll	466	India	2	moll_82	Plant_3	24 C	69 % RH	S. b.	female	22	9	0.4243	0.0341561	Left	Forewing	uns	dry	NA	NA	NA	NA	1	0.02026	d	2	2016-12-18	NA	NA	dry	NA	NA
373	2201	moll	467	India	2	moll_100	Plant_3	24 C	69 % RH	E. i.	male	23	8	0.3169	0.0296424	Left	Forewing	uns	wet	NA	NA	NA	NA	3	0.07433	w	4	2016-12-18	NA	NA	wet	NA	NA
374	2203	moll	468	India	2	moll_64	Plant_3	24 C	69 % RH	E. i.	female	25	8	0.4613	0.0309068	Left	Forewing	uns	wet	NA	NA	NA	NA	3	0.07433	w	4	2016-12-15	NA	NA	wet	NA	NA
375	2205	moll	469	India	2	moll_58	Plant_3	24 C	69 % RH	R. c.	female	27	10	0.4546	0.0284782	Left	Forewing	uns	dry	NA	NA	NA	0.0545748	1	0.02026	d	1	2016-12-14	0.233612	large	wet	NA	NA
376	2207	moll	471	India	2	moll_81	Plant_3	24 C	69 % RH	R. c.	male	23	9	0.4654	0.0336936	Left	Forewing	uns	dry	94.1829	NA	NA	0.0335008	1	0.02026	d	2	2016-12-17	0.183032	large	wet	NA	NA
377	2209	moll	472	India	2	moll_68	Plant_3	24 C	69 % RH	A. c.	male	27	9	0.3849	0.0269413	Left	Forewing	uns	dry	NA	NA	NA	NA	1	0.02026	d	2	2016-12-15	NA	NA	dry	NA	NA
378	2211	moll	473	India	2	moll_91	Plant_3	24 C	69 % RH	Z. m. y	female	24	7	0.3168	0.0284043	Left	Forewing	uns	wet	NA	NA	NA	NA	4	0.09885	w	4	2016-12-18	NA	NA	wet	NA	NA
379	2213	moll	474	India	2	moll_81	Plant_3	24 C	69 % RH	R. c.	male	23	9	0.3869	0.0316815	Left	Forewing	uns	dry	NA	NA	NA	NA	1	0.02026	d	2	2016-12-17	NA	NA	dry	NA	NA
380	2215	moll	475	India	2	moll_60	Plant_3	24 C	69 % RH	C. d.	female	27	10	0.3373	0.0257815	Left	Forewing	uns	dry	NA	NA	NA	0.0127962	1	0.02026	d	1	2016-12-14	0.11312	small	dry	NA	NA
381	2217	moll	476	India	2	moll_60	Plant_3	24 C	69 % RH	C. d.	male	26	10	0.4118	0.0286147	Left	Forewing	uns	dry	100.32	NA	NA	0.0184188	1	0.02026	d	2	2016-12-14	0.135716	small	dry	NA	NA
382	2219	moll	477	India	2	moll_84	Plant_3	24 C	69 % RH	A. c.	female	24	9	0.449	0.0319059	Left	Forewing	uns	int	NA	NA	NA	0.0496396	2	0.04792	d	2	2016-12-18	0.222799	large	wet	NA	NA
383	2221	moll	480	India	2	moll_84	Plant_3	24 C	69 % RH	A. c.	female	24	9	0.4305	0.0314615	Left	Forewing	uns	wet	NA	NA	NA	NA	3	0.07433	d	3	2016-12-18	NA	NA	wet	NA	NA
384	2223	moll	481	India	2	moll_56	Plant_3	24 C	69 % RH	P. s.	female	28	9	0.3867	0.0260196	Left	Forewing	uns	int	NA	NA	NA	NA	2	0.04792	d	3	2016-12-14	NA	NA	wet	NA	NA
385	2225	moll	482	India	2	moll_65	Plant_3	24 C	69 % RH	B. mi.	female	27	9	0.3703	0.0265963	Left	Forewing	uns	wet	NA	NA	NA	0.074243	3	0.07433	w	3	2016-12-15	0.272476	large	wet	NA	NA
386	2227	moll	483	India	2	moll_55	Plant_3	24 C	69 % RH	S. b.	female	29	8	0.2835	0.0226527	Left	Forewing	uns	int	NA	NA	NA	NA	2	0.04792	d	3	2016-12-14	NA	NA	wet	NA	NA
387	2229	moll	486	India	2	moll_81	Plant_3	24 C	69 % RH	R. c.	male	26	10	0.5779	0.0320364	Left	Forewing	uns	dry	NA	NA	NA	NA	1	0.02026	w	1	2016-12-17	NA	NA	dry	NA	NA
388	2231	moll	488	India	2	moll_60	Plant_3	24 C	69 % RH	C. d.	female	28	10	0.3736	0.0257224	Left	Forewing	uns	dry	NA	NA	NA	0.0126522	1	0.02026	d	2	2016-12-14	0.112482	small	dry	NA	NA
389	2233	moll	489	India	2	moll_82	Plant_3	24 C	69 % RH	S. b.	male	25	8	0.2965	0.0266728	Left	Forewing	uns	dry	NA	NA	NA	0.0212941	1	0.02026	d	1	2016-12-18	0.145925	small	dry	NA	NA
390	2235	moll	490	India	2	moll_89	Plant_3	24 C	69 % RH	A. c.	male	25	9	0.4692	0.0310823	Left	Forewing	uns	dry	NA	NA	NA	NA	1	0.02026	d	1	2016-12-18	NA	NA	dry	NA	NA
391	2237	moll	491	India	2	moll_91	Plant_3	24 C	69 % RH	Z. m. y	female	25	8	0.3526	0.0282588	Left	Forewing	uns	wet	NA	NA	NA	NA	3	0.07433	w	4	2016-12-18	NA	NA	wet	NA	NA
392	2239	moll	492	India	2	moll_88	Plant_3	24 C	69 % RH	C. d.	female	25	8	0.3351	0.0277834	Left	Forewing	uns	int	NA	NA	NA	NA	2	0.04792	d	3	2016-12-18	NA	NA	wet	NA	NA
393	2241	moll	505	India	2	moll_104	Plant_3	24 C	69 % RH	E. i.	female	25	10	0.4524	0.0307068	Left	Forewing	uns	dry	NA	NA	NA	NA	1	0.02026	d	0	2016-12-19	NA	NA	dry	NA	NA
394	2243	moll	507	India	2	moll_66	Plant_3	24 C	69 % RH	P. p.	female	29	10	0.5165	0.0276668	Left	Forewing	uns	dry	NA	NA	NA	NA	1	0.02026	d	0	2016-12-15	NA	NA	dry	NA	NA
395	2245	moll	508	India	2	moll_60	Plant_3	24 C	69 % RH	C. d.	male	30	9	0.3729	0.0239925	Left	Forewing	uns	dry	99.1578	NA	NA	0.00574701	1	0.02026	d	0	2016-12-14	0.0758091	small	dry	NA	NA
396	2247	moll	509	India	2	moll_53	Plant_3	24 C	69 % RH	O. c.	female	31	7	0.3791	0.0233466	Left	Forewing	uns	wet	NA	NA	NA	NA	4	0.09885	w	4	2016-12-14	NA	NA	wet	NA	NA
397	2249	moll	511	India	2	moll_91	Plant_3	24 C	69 % RH	Z. m. y	female	26	8	0.4524	0.0295257	Left	Forewing	uns	wet	NA	NA	NA	NA	4	0.09885	w	4	2016-12-18	NA	NA	wet	NA	NA
398	2251	moll	512	India	2	moll_88	Plant_3	24 C	69 % RH	C. d.	male	26	11	0.474	0.0299884	Left	Forewing	uns	dry	NA	NA	NA	0	1	0.02026	d	0	2016-12-18	0	small	dry	NA	NA
399	2253	moll	513	India	2	moll_66	Plant_3	24 C	69 % RH	P. p.	male	30	10	0.5249	0.0268888	Left	Forewing	uns	dry	NA	NA	NA	NA	1	0.02026	d	3	2016-12-15	NA	NA	dry	NA	NA
400	2255	moll	514	India	2	moll_91	Plant_3	24 C	69 % RH	Z. m. y	male	28	8	0.232	0.0219451	Left	Forewing	uns	wet	NA	NA	NA	NA	NA	NA	NA	NA	2016-12-18	NA	NA	wet	NA	NA
401	2257	moll	516	India	2	moll_53	Plant_3	24 C	69 % RH	O. c.	male	32	9	0.3706	0.0224467	Left	Forewing	uns	int	NA	NA	NA	NA	2	0.04792	w	2	2016-12-14	NA	NA	wet	NA	NA
402	2259	moll	518	India	2	moll_53	Plant_3	24 C	69 % RH	O. c.	male	32	9	0.3453	0.0219238	Left	Forewing	uns	dry	NA	NA	NA	NA	1	0.02026	d	1	2016-12-14	NA	NA	dry	NA	NA
403	2261	moll	519	India	2	moll_110	Plant_3	24 C	69 % RH	M. r.	female	27	9	0.2901	0.024518	Left	Forewing	uns	dry	NA	NA	NA	NA	1	0.02026	d	2	2016-12-19	NA	NA	dry	NA	NA
404	2263	moll	520	India	2	moll_56	Plant_3	24 C	69 % RH	P. s.	male	32	8	0.3741	0.0225171	Left	Forewing	uns	int	NA	NA	NA	NA	2	0.04792	d	2	2016-12-14	NA	NA	wet	NA	NA
405	2265	moll	521	India	2	moll_107	Plant_3	24 C	69 % RH	C. h..	female	28	8	0.4217	0.026782	Left	Forewing	uns	int	NA	NA	NA	NA	2	0.04792	d	3	2016-12-19	NA	NA	wet	NA	NA
406	2267	moll	522	India	2	moll_71	Plant_3	24 C	69 % RH	P. p.	male	32	11	0.3704	0.0224426	Left	Forewing	uns	dry	NA	NA	NA	NA	1	0.02026	d	0	2016-12-15	NA	NA	dry	NA	NA
407	2269	moll	523	India	2	moll_71	Plant_3	24 C	69 % RH	P. p.	female	33	10	0.3983	0.0222958	Left	Forewing	uns	dry	104.488	NA	NA	0.0577544	1	0.02026	d	1	2016-12-15	0.240322	large	wet	NA	NA
408	2271	moll	524	India	2	moll_75	Plant_3	24 C	69 % RH	O. c.	male	33	9	0.3169	0.0206598	Left	Forewing	uns	int	NA	NA	NA	NA	2	0.04792	w	3	2016-12-15	NA	NA	wet	NA	NA
409	2273	moll	525	India	2	moll_94	Plant_3	24 C	69 % RH	C. f.	female	30	9	0.3533	0.0235646	Left	Forewing	uns	dry	NA	NA	NA	NA	1	0.02026	d	3	2016-12-18	NA	NA	dry	NA	NA
410	2275	moll	526	India	2	moll_107	Plant_3	24 C	69 % RH	C. h..	female	29	8	0.3352	0.0239536	Left	Forewing	uns	int	NA	NA	NA	NA	2	0.04792	d	3	2016-12-19	NA	NA	wet	NA	NA
411	2277	moll	528	India	2	moll_56	Plant_3	24 C	69 % RH	P. s.	male	35	9	0.4088	0.0212049	Left	Forewing	uns	dry	NA	NA	NA	NA	1	0.02026	d	0	2016-12-14	NA	NA	dry	NA	NA
412	2279	moll	530	India	2	moll_63	Plant_3	24 C	69 % RH	M. r.	female	34	10	0.448	0.0225051	Left	Forewing	uns	dry	NA	NA	NA	NA	1	0.02026	d	0	2016-12-15	NA	NA	dry	NA	NA
413	2281	moll	533	India	2	moll_66	Plant_3	24 C	69 % RH	P. p.	female	36	10	0.5608	0.0229069	Left	Forewing	uns	dry	NA	NA	NA	0.00759861	1	0.02026	d	0	2016-12-15	0.08717	small	dry	NA	NA
414	2283	moll	534	India	2	moll_71	Plant_3	24 C	69 % RH	P. p.	male	36	9	0.3919	0.0203277	Left	Forewing	uns	dry	NA	NA	NA	NA	1	0.02026	d	0	2016-12-15	NA	NA	dry	NA	NA
415	2285	moll	536	India	2	moll_99	Plant_3	24 C	69 % RH	M. r.	female	NA	8	0.2683	NA	Left	Forewing	uns	int	NA	NA	NA	NA	2	0.04792	w	3	2017-12-18	NA	NA	wet	NA	NA
416	2287	moll	546	India	2	moll_105	Plant_3	24 C	69 % RH	C. h..	male	37	10	0.2556	0.0171522	Left	Forewing	uns	int	NA	NA	NA	NA	2	0.04792	d	1	2016-12-19	NA	NA	wet	NA	NA
417	2289	moll	547	India	2	moll_83	Plant_3	24 C	69 % RH	C. f.	male	38	9	0.2556	0.0167008	Left	Forewing	uns	dry	NA	NA	NA	0.00578344	1	0.02026	d	0	2016-12-18	0.0760489	small	dry	NA	NA
418	2291	moll	548	India	2	moll_71	Plant_3	24 C	69 % RH	P. p.	female	41	9	0.43	0.0184094	Left	Forewing	uns	dry	NA	NA	NA	NA	1	0.02026	d	1	2016-12-15	NA	NA	dry	NA	NA
419	2293	moll	549	India	2	moll_105	Plant_3	24 C	69 % RH	C. h..	male	39	8	0.4296	0.0193474	Left	Forewing	uns	dry	NA	NA	NA	NA	1	0.02026	d	0	2016-12-19	NA	NA	dry	NA	NA
420	2295	moll	550	India	2	moll_83	Plant_3	24 C	69 % RH	C. f.	male	40	8	0.317	0.0170462	Left	Forewing	uns	dry	83.3674	NA	NA	0.0070008	1	0.02026	d	0	2016-12-18	0.0836708	small	dry	NA	NA
421	2297	moll	566	India	2	moll_121	Plant_4	24 C	69 % RH	Z. m. y	female	23	8	0.297	0.0290084	Left	Forewing	uns	wet	NA	NA	1.0015	0.113872	4	0.09885	w	4	2017-04-21	0.33745	large	wet	0.00648495	0.0805292
422	2305	moll	600	India	2	moll_122	Plant_4	24 C	69 % RH	C. h..	female	39	8	0.3995	0.0188846	Left	Forewing	uns	wet	NA	NA	NA	0.0624734	3	0.07433	w	4	2017-04-21	0.249947	large	wet	NA	NA
423	2307	moll	601	India	2	moll_129	Plant_4	24 C	69 % RH	S. b.	male	20	NA	0.4288	0.0377041	Left	Forewing	uns	wet	116.438	NA	1.7104	0.0699471	3	0.07433	w	4	2017-05-12	0.264475	large	wet	0.0115601	0.107518
424	2309	moll	603	India	2	moll_130	Plant_4	24 C	69 % RH	Z. m. y	female	17	NA	0.4907	0.046397	Left	Forewing	uns	wet	134.739	NA	3.2307	0.102013	4	0.09885	w	4	2017-05-18	0.319394	large	wet	0.0201408	0.141918
425	2311	moll	604	India	2	moll_131	Plant_4	24 C	69 % RH	Z. m. y	female	19	NA	0.3445	0.0368957	Left	Forewing	uns	wet	98.2853	NA	1.1548	0.0893536	3	0.07433	w	4	2017-05-18	0.298921	large	wet	0.00885738	0.0941137
426	2313	moll	605	India	2	moll_131	Plant_4	24 C	69 % RH	Z. m. y	male	20	7	0.2905	0.0331145	Left	Forewing	uns	wet	89.8268	NA	0.5465	0.0701423	3	0.07433	w	4	2017-05-18	0.264844	large	wet	0.00394037	0.0627724
427	2315	moll	606	India	2	moll_130	Plant_4	24 C	69 % RH	Z. m. y	female	20	NA	0.3721	0.0359631	Left	Forewing	uns	wet	111.387	NA	2.0097	0.0945633	4	0.09885	w	4	2017-05-18	0.307512	large	wet	0.0145237	0.120514
428	2317	moll	607	India	2	moll_130	Plant_4	24 C	69 % RH	Z. m. y	female	20	NA	0.467	0.038792	Left	Forewing	uns	wet	115.677	NA	1.9777	0.0768109	3	0.07433	w	4	2017-05-18	0.277148	large	wet	0.0134674	0.116049
429	2319	moll	608	India	2	moll_122	Plant_4	24 C	69 % RH	C. h..	male	21	9	0.4215	0.0147015	Left	Forewing	uns	int	122.058	NA	3.0261	0.0408778	2	0.04792	d	3	2017-04-21	0.202182	large	wet	0.0201998	0.142126
430	2321	moll	609	India	2	moll_124	Plant_4	24 C	69 % RH	D. s.	female	44	9	0.3714	0.0163366	Left	Forewing	uns	int	115.345	NA	3.4691	0.0468665	2	0.04792	d	3	2017-04-26	0.216487	large	wet	0.0203996	0.142827
431	2325	moll	611	India	2	moll_134	Plant_4	24 C	69 % RH	M. r.	male	17	9	0.3622	0.0419309	Left	Forewing	uns	wet	102.662	NA	1.1643	0.0805149	3	0.07433	w	4	2017-05-26	0.283752	large	wet	0.00734612	0.0857095
432	2327	moll	612	India	2	moll_134	Plant_4	24 C	69 % RH	M. r.	male	18	10	0.4247	0.0417595	Left	Forewing	uns	wet	113.808	NA	1.574	0.0583208	3	0.07433	w	4	2017-05-26	0.241497	large	wet	0.00928003	0.0963329
433	2329	moll	614	India	2	moll_134	Plant_4	24 C	69 % RH	M. r.	female	21	9	0.3704	0.0341983	Left	Forewing	uns	wet	108.818	NA	2.6671	0.0553915	3	0.07433	w	3	2017-05-26	0.235354	large	wet	0.0174563	0.132122
434	2331	moll	615	India	2	moll_134	Plant_4	24 C	69 % RH	E. i.	male	23	8	0.3598	0.0309238	Left	Forewing	uns	wet	93.6347	NA	2.0703	0.0632944	3	0.07433	d	4	2017-05-26	0.251584	large	wet	0.0128851	0.113512
435	2333	moll	616	India	2	moll_132	Plant_4	24 C	69 % RH	R. c.	male	23	8	0.4825	0.0341013	Left	Forewing	uns	wet	117.757	NA	1.3224	0.0752047	3	0.07433	w	4	2017-05-25	0.274235	large	wet	0.00949234	0.0974287
436	2335	moll	617	India	2	moll_139	Plant_4	24 C	69 % RH	R. c.	male	23	9	0.5694	0.0360367	Left	Forewing	uns	wet	138.081	NA	2.3021	0.0478467	3	0.07433	w	4	2017-05-28	0.218739	large	wet	0.0151168	0.12295
437	2337	moll	618	India	2	moll_143	Plant_4	24 C	69 % RH	S. b.	male	20	NA	0.2928	0.0332017	Left	Forewing	uns	wet	82.7467	NA	1.0947	0.0730072	3	0.07433	w	4	2017-05-30	0.270198	large	wet	0.0093986	0.0969464
438	2339	moll	619	India	2	moll_132	Plant_4	24 C	69 % RH	R. c.	male	25	NA	0.485	0.0314273	Left	Forewing	uns	wet	123.822	NA	3.2594	0.062513	3	0.07433	w	4	2017-05-25	0.250026	large	wet	0.0251685	0.158646
439	2343	moll	620	India	2	moll_139	Plant_4	24 C	69 % RH	R. c.	male	23	9	0.4886	0.0342444	Left	Forewing	uns	int	115.81	NA	2.1338	0.0504003	2	0.04792	w	3	2017-05-28	0.2245	large	wet	0.0166022	0.12885
440	2345	moll	621	India	2	moll_133	Plant_4	24 C	69 % RH	P. s.	male	26	9	0.5074	0.0306768	Left	Forewing	uns	int	122.844	NA	2.4055	0.0443631	2	0.04792	w	4	2017-05-25	0.210625	large	wet	0.0169995	0.130382
441	2347	moll	622	India	2	moll_140	Plant_4	24 C	69 % RH	E. i.	female	23	8	0.5163	0.0348797	Left	Forewing	uns	wet	135.066	NA	2.6004	0.0843798	3	0.07433	w	4	2017-05-29	0.290482	large	wet	0.0179067	0.133816
442	2349	moll	624	India	2	moll_133	Plant_4	24 C	69 % RH	P. s.	female	26	9	0.4435	0.0293308	Left	Forewing	uns	wet	126.582	NA	2.8471	0.059418	3	0.07433	w	4	2017-05-25	0.243758	large	wet	0.0178756	0.1337
443	2351	moll	625	India	2	moll_136	Plant_4	24 C	69 % RH	P. s.	male	23	9	0.4725	0.0338641	Left	Forewing	uns	wet	132.254	NA	2.8372	0.0865297	3	0.07433	w	4	2017-05-28	0.294159	large	wet	0.0204604	0.14304
444	2353	moll	626	India	2	moll_133	Plant_4	24 C	69 % RH	P. s.	female	27	NA	0.5645	0.0306096	Left	Forewing	uns	int	137.79	NA	3.7261	0.0499991	2	0.04792	d	3	2017-05-25	0.223605	large	wet	0.0241672	0.155458
445	2355	moll	627	India	2	moll_139	Plant_4	24 C	69 % RH	R. c.	female	23	9	0.4544	0.033426	Left	Forewing	uns	wet	129.666	NA	2.3155	0.084576	3	0.07433	w	4	2017-05-28	0.29082	large	wet	0.0184318	0.135764
446	2359	moll	630	India	2	moll_132	Plant_4	24 C	69 % RH	R. c.	female	27	NA	0.5448	0.0302493	Left	Forewing	uns	wet	145.937	NA	3.1939	0.103123	4	0.09885	w	3	2017-05-25	0.321128	large	wet	0.024369	0.156106
447	2361	moll	631	India	2	moll_169	Plant_4	24 C	69 % RH	P. p.	female	16	10	0.4922	0.049347	Left	Forewing	uns	wet	129.685	NA	3.2085	0.0747389	3	0.07433	w	4	2017-06-07	0.273384	large	wet	0.0291462	0.170723
448	2363	moll	632	India	2	moll_143	Plant_4	24 C	69 % RH	S. b.	male	24	8	0.4052	0.0308327	Left	Forewing	uns	wet	113.662	NA	1.7735	0.0764749	3	0.07433	w	3	2017-05-30	0.276541	large	wet	0.0147654	0.121513
449	2365	moll	633	India	2	moll_132	Plant_4	24 C	69 % RH	R. c.	male	30	9	0.362	0.0237565	Left	Forewing	uns	wet	107.637	NA	1.4309	0.0677251	3	0.07433	w	3	2017-05-25	0.260241	large	wet	0.0127507	0.112919
450	2367	moll	634	India	2	moll_135	Plant_4	24 C	69 % RH	P. p.	male	27	NA	0.4716	0.0288289	Left	Forewing	uns	wet	126.39	NA	2.8945	0.0477086	3	0.07433	w	3	2017-05-26	0.218423	large	wet	0.0234178	0.153029
451	2369	moll	635	India	2	moll_135	Plant_4	24 C	69 % RH	P. p.	male	29	9	0.3734	0.024831	Left	Forewing	uns	int	84.3856	NA	2.306	0.0283782	2	0.04792	d	3	2017-05-26	0.168458	large	wet	0.0196636	0.140227
452	2371	moll	636	India	2	moll_135	Plant_4	24 C	69 % RH	P. p.	male	29	9	0.3157	0.0234798	Left	Forewing	uns	wet	94.6449	NA	1.0284	0.0711526	3	0.07433	w	4	2017-05-26	0.266745	large	wet	0.0128902	0.113535
453	2373	moll	637	India	2	moll_178	Plant_4	24 C	69 % RH	E. i.	female	14	8	0.4227	0.0536063	Left	Forewing	uns	wet	121.065	NA	1.2575	0.0968785	4	0.09885	w	4	2017-06-09	0.311253	large	wet	0.00987792	0.0993877
454	2375	moll	638	India	2	moll_156	Plant_4	24 C	69 % RH	P. p.	male	21	NA	0.4191	0.0356358	Left	Forewing	uns	wet	NA	NA	NA	NA	3	0.07433	w	4	2017-06-04	NA	NA	wet	NA	NA
455	2377	moll	639	India	2	moll_176	Plant_4	24 C	69 % RH	S. b.	male	16	NA	0.386	0.0455067	Left	Forewing	uns	wet	101.754	NA	0.9424	0.113544	4	0.09885	w	4	2017-06-09	0.336963	large	wet	0.00646159	0.080384
456	2381	moll	640	India	2	moll_181	Plant_4	24 C	69 % RH	S. b.	male	15	NA	0.414	0.0496869	Left	Forewing	uns	wet	107.404	NA	1.0229	0.0693299	3	0.07433	w	4	2017-06-10	0.263306	large	wet	0.00641047	0.0800654
457	2383	moll	641	India	2	moll_146	Plant_4	24 C	69 % RH	S. b.	female	24	9	0.3863	0.0303457	Left	Forewing	uns	wet	120.008	NA	1.8206	0.0780937	3	0.07433	w	4	2017-06-01	0.279453	large	wet	0.0162835	0.127607
458	2385	moll	642	India	2	moll_178	Plant_4	24 C	69 % RH	E. i.	male	16	9	0.4339	0.0473162	Left	Forewing	uns	wet	106.541	NA	1.1506	0.0735222	3	0.07433	w	4	2017-06-09	0.27115	large	wet	0.00979653	0.0989774
459	2387	moll	643	India	2	moll_146	Plant_4	24 C	69 % RH	S. b.	male	24	8	0.3614	0.0296792	Left	Forewing	uns	wet	96.0111	NA	1.0593	0.0761797	3	0.07433	w	3	2017-06-01	0.276007	large	wet	0.00698891	0.0835997
460	2389	moll	644	India	2	moll_170	Plant_4	24 C	69 % RH	S. b.	female	18	8	0.4915	0.0438432	Left	Forewing	uns	wet	144.953	NA	3.5218	0.0639877	3	0.07433	w	4	2017-06-07	0.252958	large	wet	0.0228459	0.151149
461	2391	moll	645	India	2	moll_170	Plant_4	24 C	69 % RH	S. b.	male	18	NA	0.3321	0.0384725	Left	Forewing	uns	wet	91.3279	NA	0.7596	0.0535984	3	0.07433	w	4	2017-06-07	0.231513	large	wet	0.00626143	0.0791292
462	2393	moll	646	India	2	moll_171	Plant_4	24 C	69 % RH	O. c.	male	18	9	0.4013	0.040978	Left	Forewing	uns	wet	109.885	NA	0.9198	0.0866683	3	0.07433	w	4	2017-06-07	0.294395	large	wet	0.00750237	0.0866162
463	2395	moll	647	India	2	moll_139	Plant_4	24 C	69 % RH	R. c.	female	29	9	0.4946	0.0272701	Left	Forewing	uns	wet	139.956	NA	3.5487	0.0694585	3	0.07433	w	3	2017-05-28	0.26355	large	wet	0.0270104	0.164348
464	2397	moll	648	India	2	moll_171	Plant_4	24 C	69 % RH	O. c.	female	19	8	0.4249	0.0395678	Left	Forewing	uns	wet	121.923	NA	2.3129	0.0674327	3	0.07433	w	4	2017-06-07	0.259678	large	wet	0.0174001	0.131909
465	2399	moll	649	India	2	moll_176	Plant_4	24 C	69 % RH	S. b.	male	17	9	0.3488	0.0414073	Left	Forewing	uns	wet	95.9716	NA	0.9228	0.0624827	3	0.07433	w	4	2017-06-09	0.249965	large	wet	0.00568668	0.0754101
466	2403	moll	650	India	2	moll_171	Plant_4	24 C	69 % RH	O. c.	male	19	8	0.3886	0.0384073	Left	Forewing	uns	wet	112.622	NA	0.9153	0.0480898	3	0.07433	w	4	2017-06-07	0.219294	large	wet	0.00529625	0.0727753
467	2405	moll	651	India	2	moll_154	Plant_4	24 C	69 % RH	O. c.	male	22	8	0.3824	0.0329926	Left	Forewing	uns	wet	91.9075	NA	1.0024	0.0784895	3	0.07433	w	4	2017-06-04	0.28016	large	wet	0.00780497	0.0883457
468	2407	moll	652	India	2	moll_161	Plant_4	24 C	69 % RH	C. d.	male	21	NA	0.3781	0.0344336	Left	Forewing	uns	wet	105.413	NA	1.2593	0.0538788	3	0.07433	w	4	2017-06-05	0.232118	large	wet	0.00969419	0.0984591
469	2409	moll	653	India	2	moll_189	Plant_4	24 C	69 % RH	E. i.	male	15	8	0.4427	0.0508095	Left	Forewing	uns	wet	109.378	NA	1.4002	0.0874498	3	0.07433	w	4	2017-06-13	0.295719	large	wet	0.00985185	0.0992565
470	2411	moll	654	India	2	moll_177	Plant_4	24 C	69 % RH	P. p.	male	19	NA	0.3535	0.0372143	Left	Forewing	uns	wet	104.193	NA	1.4013	0.0775452	3	0.07433	w	4	2017-06-09	0.278469	large	wet	0.00906708	0.0952212
471	2413	moll	655	India	2	moll_184	Plant_4	24 C	69 % RH	E. i.	male	17	8	0.3669	0.0421115	Left	Forewing	uns	wet	92.5871	NA	0.5902	0.0882898	3	0.07433	w	4	2017-06-11	0.297136	large	wet	0.00431782	0.0657101
472	2415	moll	656	India	2	moll_171	Plant_4	24 C	69 % RH	O. c.	male	20	8	0.3971	0.0367511	Left	Forewing	uns	wet	111.099	NA	1.2859	0.0792499	3	0.07433	w	4	2017-06-07	0.281514	large	wet	0.00844258	0.0918835
473	2417	moll	657	India	2	moll_177	Plant_4	24 C	69 % RH	P. p.	male	19	NA	0.3321	0.0364476	Left	Forewing	uns	wet	100.941	NA	1.21	0.0537404	3	0.07433	w	4	2017-06-09	0.23182	large	wet	0.00770267	0.0877649
474	2419	moll	658	India	2	moll_181	Plant_4	24 C	69 % RH	S. b.	male	18	7	0.379	0.0402044	Left	Forewing	uns	wet	106.074	NA	0.7132	0.0726649	3	0.07433	w	4	2017-06-10	0.269564	large	wet	0.00431873	0.0657171
475	2421	moll	659	India	2	moll_173	Plant_4	24 C	69 % RH	Z. m. y	female	19	8	0.2906	0.0348614	Left	Forewing	uns	wet	86.8726	NA	1.5528	0.0630918	3	0.07433	w	4	2017-06-09	0.251181	large	wet	0.00965051	0.098237
476	2423	moll	660	India	2	moll_156	Plant_4	24 C	69 % RH	P. p.	male	22	10	0.4505	0.0348451	Left	Forewing	uns	wet	115.859	NA	1.9392	0.0569046	3	0.07433	w	3	2017-06-04	0.238547	large	wet	0.0114158	0.106845
477	2425	moll	661	India	2	moll_171	Plant_4	24 C	69 % RH	O. c.	male	20	9	0.3703	0.035905	Left	Forewing	uns	wet	102.873	NA	1.826	0.0612784	3	0.07433	w	3	2017-06-07	0.247545	large	wet	0.0111927	0.105796
478	2427	moll	662	India	2	moll_144	Plant_4	24 C	69 % RH	P. p.	male	28	8	0.393	0.0261601	Left	Forewing	uns	int	108.524	NA	1.5341	0.0517448	2	0.04792	w	3	2017-05-31	0.227475	large	wet	0.00939178	0.0969112
479	2429	moll	663	India	2	moll_172	Plant_4	24 C	69 % RH	R. c.	male	18	8	0.486	0.043679	Left	Forewing	uns	wet	123.311	NA	1.0482	0.0689561	3	0.07433	w	4	2017-06-09	0.262595	large	wet	0.00700941	0.0837222
480	2431	moll	664	India	2	moll_178	Plant_4	24 C	69 % RH	E. i.	female	18	8	0.4573	0.0428017	Left	Forewing	uns	wet	133.505	NA	2.1126	0.0947939	4	0.09885	w	4	2017-06-09	0.307886	large	wet	0.0127135	0.112754
481	2433	moll	665	India	2	moll_176	Plant_4	24 C	69 % RH	S. b.	female	18	8	0.4015	0.0409848	Left	Forewing	uns	wet	126.431	NA	2.5262	0.0919664	4	0.09885	w	4	2017-06-09	0.30326	large	wet	0.0188238	0.1372
482	2435	moll	666	India	2	moll_170	Plant_4	24 C	69 % RH	S. b.	male	21	6	0.3701	0.0341891	Left	Forewing	uns	wet	106.675	NA	1.6571	0.0695162	3	0.07433	w	4	2017-06-07	0.263659	large	wet	0.0115471	0.107458
483	2437	moll	667	India	2	moll_178	Plant_4	24 C	69 % RH	E. i.	female	18	7	0.4488	0.0425349	Left	Forewing	uns	wet	123.557	NA	1.876	0.100486	3	0.07433	w	4	2017-06-09	0.316995	large	wet	0.0118535	0.108874
484	2439	moll	668	India	2	moll_156	Plant_4	24 C	69 % RH	P. p.	female	23	8	0.4312	0.0328472	Left	Forewing	uns	wet	124.567	NA	2.478	0.0752305	3	0.07433	w	4	2017-06-04	0.274282	large	wet	0.0149153	0.122128
485	2441	moll	669	India	2	moll_178	Plant_4	24 C	69 % RH	E. i.	female	18	NA	0.471	0.0432249	Left	Forewing	uns	wet	127.315	NA	2.5767	0.0934998	3	0.07433	w	4	2017-06-09	0.305777	large	wet	0.0190929	0.138177
486	2443	moll	670	India	2	moll_176	Plant_4	24 C	69 % RH	S. b.	male	18	8	0.3645	0.039685	Left	Forewing	uns	wet	103.66	NA	0.9663	0.0810589	3	0.07433	w	4	2017-06-09	0.284708	large	wet	0.00674039	0.0820999
487	2445	moll	671	India	2	moll_177	Plant_4	24 C	69 % RH	P. p.	male	20	7	0.311	0.0338758	Left	Forewing	uns	wet	88.5521	NA	0.8727	0.0607367	3	0.07433	w	4	2017-06-09	0.246448	large	wet	0.00730184	0.0854508
488	2447	moll	672	India	2	moll_184	Plant_4	24 C	69 % RH	E. i.	male	18	8	0.4698	0.0431882	Left	Forewing	uns	wet	108.413	NA	0.8501	0.0766116	3	0.07433	w	4	2017-06-11	0.276788	large	wet	0.0080784	0.0898799
489	2449	moll	673	India	2	moll_183	Plant_4	24 C	69 % RH	S. b.	female	18	7	0.3586	0.0394697	Left	Forewing	uns	wet	113.77	NA	1.489	0.0941151	4	0.09885	w	4	2017-06-11	0.306782	large	wet	0.0119206	0.109181
490	2451	moll	674	India	2	moll_177	Plant_4	24 C	69 % RH	P. p.	female	20	7	0.4127	0.0372262	Left	Forewing	uns	wet	131.604	NA	3.1441	0.0731579	3	0.07433	w	4	2017-06-09	0.270477	large	wet	0.0240541	0.155094
491	2453	moll	675	India	2	moll_176	Plant_4	24 C	69 % RH	S. b.	female	20	7	0.3787	0.0361744	Left	Forewing	uns	wet	124.992	NA	2.4197	0.0959216	4	0.09885	w	4	2017-06-09	0.309712	large	wet	0.0158692	0.125973
492	2455	moll	676	India	2	moll_184	Plant_4	24 C	69 % RH	E. i.	male	18	7	0.424	0.0417365	Left	Forewing	uns	wet	102.287	NA	0.4244	0.0614906	3	0.07433	w	4	2017-06-11	0.247973	large	wet	0.0026229	0.0512142
493	2457	moll	677	India	2	moll_176	Plant_4	24 C	69 % RH	S. b.	female	20	7	0.3571	0.0354732	Left	Forewing	uns	wet	112.507	NA	NA	0.0919303	3	0.07433	w	4	2017-06-09	0.3032	large	wet	NA	NA
494	2459	moll	678	India	2	moll_154	Plant_4	24 C	69 % RH	O. c.	female	25	7	0.3671	0.028641	Left	Forewing	uns	wet	121.985	NA	2.0111	0.109892	4	0.09885	w	4	2017-06-04	0.3315	large	wet	0.0173232	0.131618
495	2461	moll	679	India	2	moll_156	Plant_4	24 C	69 % RH	P. p.	female	25	8	0.3922	0.0292794	Left	Forewing	uns	wet	116.981	NA	2.4837	0.0757269	3	0.07433	w	4	2017-06-04	0.275185	large	wet	0.0224836	0.149945
496	2463	moll	680	India	2	moll_170	Plant_4	24 C	69 % RH	S. b.	female	22	8	0.3891	0.0331842	Left	Forewing	uns	wet	111.215	NA	2.0713	0.0633787	2	0.04792	w	4	2017-06-07	0.251751	large	wet	0.0161903	0.127241
497	2465	moll	681	India	2	moll_181	Plant_4	24 C	69 % RH	S. b.	male	19	7	0.386	0.0383215	Left	Forewing	uns	wet	112.613	NA	1.6275	0.0520465	2	0.04792	w	4	2017-06-10	0.228137	large	wet	0.0123744	0.11124
498	2467	moll	682	India	2	moll_181	Plant_4	24 C	69 % RH	S. b.	female	19	8	0.4026	0.0388631	Left	Forewing	uns	wet	120.279	NA	2.9227	0.0633492	3	0.07433	w	4	2017-06-10	0.251693	large	wet	0.0218319	0.147756
499	2469	moll	683	India	2	moll_185	Plant_4	24 C	69 % RH	P. s.	female	19	9	0.4423	0.0401007	Left	Forewing	uns	wet	123.584	NA	3.8417	0.0838963	3	0.07433	w	4	2017-06-11	0.289649	large	wet	0.0269186	0.164069
500	2471	moll	684	India	2	moll_184	Plant_4	24 C	69 % RH	E. i.	male	19	8	0.4562	0.0405165	Left	Forewing	uns	wet	112.582	NA	0.7098	0.0700773	3	0.07433	w	4	2017-06-11	0.264721	large	wet	0.00493008	0.0702145
501	2473	moll	685	India	2	moll_189	Plant_4	24 C	69 % RH	E. i.	male	18	8	0.4803	0.0435076	Left	Forewing	uns	wet	121.445	NA	1.5286	0.0783763	3	0.07433	w	4	2017-06-13	0.279958	large	wet	0.0113425	0.106501
502	2475	moll	686	India	2	moll_177	Plant_4	24 C	69 % RH	P. p.	male	21	8	0.3351	0.0330754	Left	Forewing	uns	wet	90.6829	NA	1.2113	0.055338	3	0.07433	w	3	2017-06-09	0.23524	large	wet	0.00874703	0.0935256
503	2477	moll	687	India	2	moll_189	Plant_4	24 C	69 % RH	E. i.	male	17	9	0.4259	0.0442575	Left	Forewing	uns	wet	117.002	NA	1.9975	0.0725592	3	0.07433	w	4	2017-06-13	0.269368	large	wet	0.0168457	0.129791
504	2479	moll	688	India	2	moll_189	Plant_4	24 C	69 % RH	E. i.	male	18	8	0.4149	0.0414358	Left	Forewing	uns	wet	107.436	NA	1.2104	0.104539	3	0.07433	w	4	2017-06-13	0.323325	large	wet	0.00993954	0.0996972
505	2481	moll	689	India	2	moll_162	Plant_4	24 C	69 % RH	O. c.	male	26	9	0.3038	0.0258557	Left	Forewing	uns	wet	NA	NA	NA	NA	3	0.07433	w	4	2017-06-05	NA	NA	wet	NA	NA
506	2483	moll	690	India	2	moll_189	Plant_4	24 C	69 % RH	E. i.	male	18	9	0.3988	0.0408927	Left	Forewing	uns	wet	103.548	NA	1.2059	0.0896983	3	0.07433	w	4	2017-06-13	0.299497	large	wet	0.0100572	0.100286
507	2485	moll	691	India	2	moll_183	Plant_4	24 C	69 % RH	S. b.	female	20	NA	0.4297	0.0377304	Left	Forewing	uns	wet	122.692	NA	2.8912	0.0941941	3	0.07433	w	4	2017-06-11	0.306911	large	wet	0.0237455	0.154096
508	2487	moll	692	India	2	moll_179	Plant_4	24 C	69 % RH	P. s.	female	21	8	0.416	0.0355477	Left	Forewing	uns	wet	123.597	NA	3.1347	0.0805099	3	0.07433	w	4	2017-06-09	0.283743	large	wet	0.0252359	0.158858
509	2489	moll	693	India	2	moll_183	Plant_4	24 C	69 % RH	S. b.	male	19	8	0.3822	0.0381953	Left	Forewing	uns	wet	102.554	NA	1.3007	0.070256	3	0.07433	w	4	2017-06-11	0.265058	large	wet	0.011514	0.107303
510	2491	moll	694	India	2	moll_153	Plant_4	24 C	69 % RH	P. p.	male	27	9	0.4338	0.0280371	Left	Forewing	uns	wet	115.851	NA	3.2543	0.0533279	3	0.07433	w	3	2017-06-04	0.230928	large	wet	0.028756	0.169576
511	2493	moll	695	India	2	moll_187	Plant_4	24 C	69 % RH	E. i.	male	20	8	0.4335	0.0378413	Left	Forewing	uns	wet	108.249	NA	0.8778	0.0600905	3	0.07433	w	4	2017-06-13	0.245134	large	wet	0.00820631	0.0905887
512	2495	moll	696	India	2	moll_177	Plant_4	24 C	69 % RH	P. p.	male	24	8	0.3924	0.0305046	Left	Forewing	uns	wet	111.865	NA	1.7517	0.0644132	3	0.07433	w	4	2017-06-09	0.253798	large	wet	0.0154411	0.124262
513	2497	moll	697	India	2	moll_177	Plant_4	24 C	69 % RH	P. p.	male	24	7	0.3614	0.0296792	Left	Forewing	uns	int	99.726	NA	1.6582	0.0522852	2	0.04792	w	3	2017-06-09	0.22866	large	wet	0.0108977	0.104392
514	2499	moll	698	India	2	moll_154	Plant_4	24 C	69 % RH	O. c.	male	30	NA	0.2862	0.0219669	Left	Forewing	uns	wet	88.8735	NA	1.5055	0.0645309	3	0.07433	w	4	2017-06-04	0.254029	large	wet	0.00972736	0.0986274
515	2501	moll	699	India	2	moll_193	Plant_4	24 C	69 % RH	E. i.	male	19	NA	0.3755	0.0379708	Left	Forewing	uns	wet	97.2878	NA	0.794	0.10159	3	0.07433	w	4	2017-06-15	0.318732	large	wet	0.00521102	0.0721874
516	2505	moll	701	India	2	moll_182	Plant_4	24 C	69 % RH	P. s.	female	21	3	NA	NA	Left	Forewing	uns	wet	128.941	NA	2.4497	0.10449	4	0.09885	w	4	2017-06-11	0.323249	large	wet	0.014239	0.119327
517	2507	moll	703	India	2	moll_194	Plant_4	24 C	69 % RH	S. b.	female	17	8	0.4344	0.04455	Left	Forewing	uns	wet	107.566	NA	1.6219	0.0785064	3	0.07433	w	4	2017-06-15	0.28019	large	wet	0.00945919	0.0972583
518	2509	moll	704	India	2	moll_169	Plant_4	24 C	69 % RH	P. p.	male	26	8	0.4597	0.0296837	Left	Forewing	uns	wet	115.749	NA	1.8539	0.0483239	3	0.07433	w	4	2017-06-07	0.219827	large	wet	0.0104985	0.102462
519	2511	moll	705	India	2	moll_193	Plant_4	24 C	69 % RH	E. i.	male	18	NA	0.3941	0.0407314	Left	Forewing	uns	wet	102.257	NA	1.3651	0.0880323	3	0.07433	w	4	2017-06-15	0.296702	large	wet	0.0103112	0.101544
520	2513	moll	706	India	2	moll_194	Plant_4	24 C	69 % RH	S. b.	female	20	5	0.4344	0.0378675	Left	Forewing	uns	wet	130.338	NA	2.347	0.0912391	3	0.07433	w	4	2017-06-15	0.302058	large	wet	0.0168857	0.129945
521	2515	moll	707	India	2	moll_193	Plant_4	24 C	69 % RH	E. i.	female	20	9	0.4516	0.0383608	Left	Forewing	uns	wet	116.802	NA	2.0267	0.108356	4	0.09885	w	4	2017-06-15	0.329175	large	wet	0.0164922	0.128422
522	2517	moll	708	India	2	moll_169	Plant_4	24 C	69 % RH	P. p.	female	28	9	0.3559	0.0253096	Left	Forewing	uns	wet	116.813	NA	3.2374	0.0735385	3	0.07433	w	3	2017-06-07	0.27118	large	wet	0.0249102	0.15783
523	2519	moll	709	India	2	moll_185	Plant_4	24 C	69 % RH	P. s.	female	25	NA	0.4581	0.0308352	Left	Forewing	uns	wet	140.39	NA	3.5738	0.0766156	3	0.07433	w	4	2017-06-11	0.276795	large	wet	0.0240427	0.155057
524	2521	moll	710	India	2	moll_195	Plant_4	24 C	69 % RH	S. b.	male	21	8	0.4101	0.0353789	Left	Forewing	uns	wet	107.595	NA	1.9708	0.0561966	3	0.07433	w	4	2017-06-15	0.237058	large	wet	0.0126701	0.112562
525	2523	moll	712	India	2	moll_195	Plant_4	24 C	69 % RH	S. b.	female	21	8	0.381	0.0345215	Left	Forewing	uns	wet	120.543	NA	3.267	0.094894	3	0.07433	w	4	2017-06-15	0.308049	large	wet	0.0242793	0.155818
526	2525	moll	713	India	2	moll_190	Plant_4	24 C	69 % RH	M. r.	female	26	8	0.3947	0.028213	Left	Forewing	uns	wet	124.634	NA	2.8395	0.0730441	3	0.07433	w	4	2017-06-14	0.270267	large	wet	0.0207248	0.143961
527	2527	moll	715	India	2	moll_188	Plant_4	24 C	69 % RH	O. c.	male	28	8	0.2739	0.0231938	Left	Forewing	uns	wet	82.571	NA	1.9494	0.0944853	3	0.07433	w	4	2017-06-13	0.307385	large	wet	0.0135652	0.11647
528	2529	moll	716	India	2	moll_198	Plant_4	24 C	69 % RH	O. c.	female	17	7	0.2971	0.0392511	Left	Forewing	uns	wet	96.2454	NA	1.7872	0.0842767	3	0.07433	w	4	2017-06-23	0.290305	large	wet	0.0113818	0.106686
529	2531	moll	717	India	2	moll_167	Plant_4	24 C	69 % RH	C. f.	male	34	7	0.3656	0.0210308	Left	Forewing	uns	int	102.725	NA	3.2329	0.037979	2	0.04792	d	3	2017-06-06	0.194882	large	wet	0.0260824	0.1615
530	2533	moll	718	India	2	moll_177	Plant_4	24 C	69 % RH	P. p.	male	31	9	0.3118	0.0218741	Left	Forewing	uns	wet	87.5688	NA	1.4807	0.0725486	3	0.07433	w	4	2017-06-09	0.269348	large	wet	0.0122175	0.110533
531	2535	moll	720	India	2	moll_195	Plant_4	24 C	69 % RH	S. b.	female	26	8	0.414	0.0286655	Left	Forewing	uns	wet	130.692	NA	3.1866	0.0736045	3	0.07433	d	4	2017-06-15	0.271301	large	wet	0.0195081	0.139671
532	2537	moll	721	India	2	moll_182	Plant_4	24 C	69 % RH	P. s.	male	26	7	0.3662	0.0275169	Left	Forewing	uns	wet	108.783	NA	2.2284	0.052021	3	0.07433	w	4	2017-06-11	0.228081	large	wet	0.0132197	0.114977
533	2539	moll	722	India	2	moll_196	Plant_4	24 C	69 % RH	P. p.	female	26	8	0.3539	0.0272053	Left	Forewing	uns	wet	116.255	NA	3.1106	0.0893292	3	0.07433	w	4	2017-06-15	0.29888	large	wet	0.0248102	0.157512
534	2541	moll	724	India	2	moll_186	Plant_4	24 C	69 % RH	O. c.	male	24	NA	0.2778	0.0271873	Left	Forewing	uns	wet	94.6463	NA	1.8262	0.0681328	3	0.07433	w	3	2017-06-13	0.261023	large	wet	0.0141374	0.118901
535	2543	moll	725	India	2	moll_187	Plant_4	24 C	69 % RH	E. i.	female	24	NA	0.4067	0.0308707	Left	Forewing	uns	wet	125.2	NA	2.6703	0.0886776	3	0.07433	w	4	2017-06-13	0.297788	large	wet	0.0184316	0.135763
536	2545	moll	726	India	2	moll_196	Plant_4	24 C	69 % RH	P. p.	female	23	8	0.3448	0.0304879	Left	Forewing	uns	wet	114.859	NA	2.767	0.0770536	3	0.07433	w	4	2017-06-15	0.277585	large	wet	0.0179806	0.134092
537	2547	moll	727	India	2	moll_194	Plant_4	24 C	69 % RH	S. b.	male	24	8	0.3649	0.0297747	Left	Forewing	uns	int	103.088	NA	2.1583	0.0547731	2	0.04792	w	3	2017-06-15	0.234037	large	wet	0.0147311	0.121372
538	2549	moll	728	India	2	moll_195	Plant_4	24 C	69 % RH	S. b.	female	22	NA	0.3899	0.0332069	Left	Forewing	uns	wet	129.755	NA	3.158	0.0852938	3	0.07433	w	4	2017-06-15	0.292051	large	wet	0.0211265	0.14535
539	2551	moll	729	India	2	moll_186	Plant_4	24 C	69 % RH	O. c.	male	24	NA	0.2324	0.0256173	Left	Forewing	uns	dry	82.2695	NA	2.4884	0.0252925	1	0.02026	d	3	2017-06-13	0.159036	large	wet	0.0180714	0.13443
540	2553	moll	730	India	2	moll_167	Plant_4	24 C	69 % RH	C. f.	female	37	7	0.4896	0.0213016	Left	Forewing	uns	int	127.9	NA	3.1383	0.0374701	2	0.04792	d	3	2017-06-06	0.193572	large	wet	0.0232966	0.152632
541	2555	moll	732	India	2	moll_?	Plant_4	24 C	69 % RH	S. b.	male	NA	8	0.356	NA	Left	Forewing	uns	wet	90.5263	NA	0.6955	0.0621195	3	0.07433	w	4	NA	0.249238	large	wet	0.00527907	0.0726572
542	2557	moll	733	India	2	moll_198	Plant_4	24 C	69 % RH	O. c.	male	19	7	0.2907	0.0348654	Left	Forewing	uns	wet	87.9652	NA	1.0909	0.0822505	3	0.07433	w	4	2017-06-23	0.286793	large	wet	0.00900353	0.0948869
543	2559	moll	735	India	2	moll_203	Plant_4	24 C	69 % RH	E. i.	female	19	8	0.4755	0.0410799	Left	Forewing	uns	wet	119.871	NA	2.4208	0.0851983	3	0.07433	w	4	2017-06-24	0.291887	large	wet	0.0172843	0.13147
544	2561	moll	736	India	2	moll_202	Plant_4	24 C	69 % RH	R. c.	female	19	8	0.5389	0.0428301	Left	Forewing	uns	wet	128.802	NA	2.184	0.0780664	3	0.07433	w	3	2017-06-24	0.279404	large	wet	0.0142066	0.119192
545	2563	moll	737	India	2	moll_202	Plant_4	24 C	69 % RH	R. c.	male	18	6	0.4402	0.0422614	Left	Forewing	uns	wet	101.257	NA	0.2967	0.0921738	3	0.07433	w	4	2017-06-24	0.303601	large	wet	0.00211186	0.0459549
546	2565	moll	738	India	2	moll_175	Plant_4	24 C	69 % RH	D. s.	female	33	7	0.3902	0.0221436	Left	Forewing	uns	int	120.365	NA	3.3145	0.0491936	2	0.04792	d	3	2017-06-09	0.221796	large	wet	0.022559	0.150197
547	2567	moll	739	India	2	moll_198	Plant_4	24 C	69 % RH	O. c.	female	19	7	0.3611	0.0374791	Left	Forewing	uns	wet	111.943	NA	2.0603	0.0951981	4	0.09885	w	4	2017-06-23	0.308542	large	wet	0.0130598	0.11428
548	2569	moll	740	India	2	moll_175	Plant_4	24 C	69 % RH	D. s.	male	34	7	0.2871	0.0194028	Left	Forewing	uns	wet	95.6946	NA	2.1956	0.0652003	3	0.07433	w	4	2017-06-09	0.255344	large	wet	0.0133168	0.115399
549	2571	moll	741	India	2	moll_206	Plant_4	24 C	69 % RH	P. p.	female	19	7	0.4154	0.0392707	Left	Forewing	uns	wet	112.305	NA	2.4764	0.0849826	3	0.07433	w	4	2017-06-25	0.291518	large	wet	0.0190774	0.138121
550	2573	moll	742	India	2	moll_206	Plant_4	24 C	69 % RH	P. p.	male	19	6	0.4129	0.0391918	Left	Forewing	uns	wet	101.966	NA	1.62	0.0639102	3	0.07433	w	3	2017-06-25	0.252805	large	wet	0.011703	0.10818
551	2575	moll	743	India	2	moll_201	Plant_4	24 C	69 % RH	O. c.	male	22	6	0.3327	0.0314964	Left	Forewing	uns	int	94.3619	NA	2.0521	0.0457648	2	0.04792	w	3	2017-06-23	0.213927	large	wet	0.0166717	0.129119
552	2577	moll	744	India	2	moll_197	Plant_4	24 C	69 % RH	O. c.	female	22	8	0.421	0.0340673	Left	Forewing	uns	wet	129.825	NA	2.4946	0.0756771	3	0.07433	w	4	2017-06-23	0.275095	large	wet	0.0190778	0.138122
553	2579	moll	745	India	2	moll_197	Plant_4	24 C	69 % RH	O. c.	female	21	5	0.3391	0.0332065	Left	Forewing	uns	wet	114.656	NA	3.4238	0.0796052	3	0.07433	d	3	2017-06-23	0.282144	large	wet	0.0241508	0.155405
554	2581	moll	746	India	2	moll_201	Plant_4	24 C	69 % RH	O. c.	female	21	7	0.3933	0.034889	Left	Forewing	uns	int	112.647	NA	3.1941	0.0460861	2	0.04792	d	3	2017-06-23	0.214677	large	wet	0.0216224	0.147046
555	2583	moll	747	India	2	moll_202	Plant_4	24 C	69 % RH	R. c.	female	20	6	0.4966	0.0395949	Left	Forewing	uns	wet	134.382	NA	2.1672	0.106595	3	0.07433	w	4	2017-06-24	0.326489	large	wet	0.0149225	0.122158
556	2585	moll	748	India	2	moll_209	Plant_4	24 C	69 % RH	P. s.	male	19	6	0.3998	0.0387728	Left	Forewing	uns	wet	99.9654	NA	0.4028	0.0798379	3	0.07433	w	4	2017-06-25	0.282556	large	wet	0.00259175	0.0509093
557	2587	moll	749	India	2	moll_?	Plant_4	24 C	69 % RH	S. b.	female	NA	7	0.4341	NA	Left	Forewing	uns	wet	119.31	NA	2.8805	0.0832479	3	0.07433	w	4	NA	0.288527	large	wet	0.0205519	0.143359
558	2589	moll	750	India	2	moll_190	Plant_4	24 C	69 % RH	M. r.	female	30	NA	0.4267	0.0250949	Left	Forewing	uns	wet	136.529	NA	2.6541	0.076094	3	0.07433	w	3	2017-06-14	0.275851	large	wet	0.0175633	0.132526
559	2591	moll	751	India	2	moll_175	Plant_4	24 C	69 % RH	D. s.	female	35	7	0.2706	0.0184803	Left	Forewing	uns	int	88.8162	NA	2.6009	0.073685	3	0.07433	d	3	2017-06-09	0.27145	large	wet	0.0217428	0.147454
560	2593	moll	752	India	2	moll_175	Plant_4	24 C	69 % RH	D. s.	female	36	6	0.3131	0.0188622	Left	Forewing	uns	wet	103.317	NA	2.777	0.0720773	3	0.07433	w	3	2017-06-09	0.268472	large	wet	0.0221377	0.148788
561	2595	moll	753	India	2	moll_214	Plant_4	24 C	69 % RH	E. i.	female	20	8	0.4407	0.0380497	Left	Forewing	uns	wet	129.194	NA	2.8731	0.074949	3	0.07433	w	4	2017-06-28	0.273768	large	wet	0.0210525	0.145095
562	2597	moll	754	India	2	moll_216	Plant_4	24 C	69 % RH	S. b.	male	20	7	0.3724	0.0359727	Left	Forewing	uns	wet	102.15	NA	0.9651	0.0648479	3	0.07433	w	3	2017-06-28	0.254653	large	wet	0.00652031	0.0807484
563	2599	moll	755	India	2	moll_208	Plant_4	24 C	69 % RH	Z. m. y	female	23	8	0.3697	0.0312048	Left	Forewing	uns	wet	117.646	NA	2.0166	0.100843	4	0.09885	w	4	2017-06-25	0.317558	large	wet	0.0190699	0.138094
564	2601	moll	756	India	2	moll_217	Plant_4	24 C	69 % RH	E. i.	female	20	8	0.4403	0.0380382	Left	Forewing	uns	wet	129.297	NA	2.5956	0.0778112	3	0.07433	w	4	2017-06-28	0.278947	large	wet	0.0231775	0.152241
565	2603	moll	757	India	2	moll_214	Plant_4	24 C	69 % RH	E. i.	male	20	7	0.389	0.0364995	Left	Forewing	uns	wet	111.951	NA	1.5585	0.0682385	3	0.07433	w	4	2017-06-28	0.261225	large	wet	0.0117201	0.10826
566	2605	moll	758	India	2	moll_212	Plant_4	24 C	69 % RH	A. c.	female	21	8	0.4209	0.0356868	Left	Forewing	uns	wet	130.542	NA	2.0525	0.0729285	3	0.07433	w	3	2017-06-28	0.270053	large	wet	0.013679	0.116957
567	2607	moll	759	India	2	moll_218	Plant_4	24 C	69 % RH	E. i.	female	20	7	0.453	0.0384004	Left	Forewing	uns	wet	117.668	NA	1.375	0.0938119	3	0.07433	w	4	2017-06-28	0.306287	large	wet	0.00948365	0.097384
568	2609	moll	761	India	2	moll_208	Plant_4	24 C	69 % RH	Z. m. y	female	21	8	0.4202	0.035667	Left	Forewing	uns	wet	134.321	NA	1.6216	0.0841121	3	0.07433	w	3	2017-06-25	0.290021	large	wet	0.00988934	0.0994451
569	2611	moll	763	India	2	moll_208	Plant_4	24 C	69 % RH	Z. m. y	female	21	9	0.3986	0.035045	Left	Forewing	uns	wet	NA	NA	2.7112	NA	3	0.07433	w	4	2017-06-25	NA	NA	wet	0.0176396	0.132814
570	2613	moll	764	India	2	moll_192	Plant_4	24 C	69 % RH	O. unid.	female	35	8	0.3366	0.0198748	Left	Forewing	uns	wet	114.213	NA	3.5988	0.0438242	3	0.07433	w	4	2017-06-14	0.209342	large	wet	0.0223627	0.149542
571	2615	moll	766	India	2	moll_175	Plant_4	24 C	69 % RH	D. s.	female	38	8	0.3614	0.0187447	Left	Forewing	uns	int	110	NA	3.0439	0.051313	2	0.04792	d	3	2017-06-09	0.226524	large	wet	0.0214042	0.146302
572	2617	moll	767	India	2	moll_201	Plant_4	24 C	69 % RH	O. c.	female	24	8	0.3538	0.0294696	Left	Forewing	uns	wet	104.606	NA	2.1022	0.0702657	3	0.07433	w	3	2017-06-23	0.265077	large	wet	0.0138336	0.117616
573	2619	moll	768	India	2	moll_205	Plant_4	24 C	69 % RH	M. r.	female	21	7	0.3693	0.0341644	Left	Forewing	uns	wet	113.793	NA	1.7757	0.081494	3	0.07433	w	4	2017-06-25	0.285471	large	wet	0.0136222	0.116714
574	2621	moll	769	India	2	moll_199	Plant_4	24 C	69 % RH	P. p.	female	23	7	0.4027	0.032107	Left	Forewing	uns	wet	123.478	NA	1.7984	0.075709	3	0.07433	w	4	2017-06-23	0.275153	large	wet	0.0129166	0.113651
575	2623	moll	770	India	2	moll_201	Plant_4	24 C	69 % RH	O. c.	female	23	8	0.3367	0.0302473	Left	Forewing	uns	wet	105.085	NA	1.9261	0.0865644	3	0.07433	w	4	2017-06-23	0.294218	large	wet	0.013419	0.11584
576	2625	moll	772	India	2	moll_216	Plant_4	24 C	69 % RH	S. b.	female	21	7	0.3676	0.0341119	Left	Forewing	uns	wet	118.25	NA	2.4153	0.0739961	3	0.07433	w	4	2017-06-28	0.272022	large	wet	0.0161309	0.127007
577	2627	moll	773	India	2	moll_216	Plant_4	24 C	69 % RH	S. b.	female	22	7	0.4079	0.0337102	Left	Forewing	uns	wet	124.725	NA	3.0012	0.0722865	3	0.07433	w	4	2017-06-28	0.268862	large	wet	0.0280961	0.167619
578	2629	moll	774	India	2	moll_214	Plant_4	24 C	69 % RH	E. i.	female	21	8	0.4291	0.035917	Left	Forewing	uns	wet	139.311	NA	2.57	0.0653561	3	0.07433	w	4	2017-06-28	0.255648	large	wet	0.0241025	0.15525
579	2631	moll	775	India	2	moll_209	Plant_4	24 C	69 % RH	P. s.	female	24	8	0.4705	0.0324072	Left	Forewing	uns	int	116.571	NA	2.4165	0.0432688	2	0.04792	w	3	2017-06-25	0.208012	large	wet	0.0176878	0.132995
580	2633	moll	776	India	2	moll_216	Plant_4	24 C	69 % RH	S. b.	female	21	8	0.4231	0.0357488	Left	Forewing	uns	wet	131.781	NA	2.9435	0.0556475	3	0.07433	w	4	2017-06-28	0.235897	large	wet	0.0205312	0.143287
581	2635	moll	777	India	2	moll_214	Plant_4	24 C	69 % RH	E. i.	female	21	8	0.4646	0.0368814	Left	Forewing	uns	wet	143.528	NA	3.3606	0.0791603	3	0.07433	w	4	2017-06-28	0.281354	large	wet	0.0259354	0.161045
582	2637	moll	778	India	2	moll_217	Plant_4	24 C	69 % RH	E. i.	female	22	NA	0.4645	0.0352024	Left	Forewing	uns	wet	125.004	NA	2.2586	0.0888949	3	0.07433	w	4	2017-06-28	0.298152	large	wet	0.0178004	0.133418
583	2639	moll	779	India	2	moll_175	Plant_4	24 C	69 % RH	D. s.	female	40	8	0.3576	0.0177449	Left	Forewing	uns	wet	111.057	NA	2.4114	0.0596061	3	0.07433	w	3	2017-06-09	0.244144	large	wet	0.0215364	0.146753
584	2641	moll	780	India	2	moll_214	Plant_4	24 C	69 % RH	E. i.	female	21	7	0.4254	0.0358135	Left	Forewing	uns	wet	123.423	NA	1.9253	0.0845314	3	0.07433	w	4	2017-06-28	0.290743	large	wet	0.0171779	0.131065
585	2643	moll	781	India	2	moll_204	Plant_4	24 C	69 % RH	O. t.	male	26	NA	0.3175	0.0262386	Left	Forewing	uns	dry	99.812	NA	2.8907	0.0338077	1	0.02026	d	2	2017-06-24	0.183869	large	wet	0.0228966	0.151316
586	2645	moll	782	India	2	moll_214	Plant_4	24 C	69 % RH	E. i.	female	21	8	0.43	0.0359421	Left	Forewing	uns	wet	135.176	NA	3.1403	0.0586354	3	0.07433	w	4	2017-06-28	0.242147	large	wet	0.02406	0.155113
587	2647	moll	783	India	2	moll_223	Plant_4	24 C	69 % RH	R. c.	male	18	8	0.4293	0.0419097	Left	Forewing	uns	wet	115.659	NA	0.5411	0.119	4	0.09885	w	4	2017-07-01	0.344964	large	wet	0.00392864	0.0626789
588	2649	moll	785	India	2	moll_224	Plant_4	24 C	69 % RH	M. r.	male	19	NA	0.31678	0.0358783	Left	Forewing	uns	wet	92.0112	NA	1.3354	0.0732693	3	0.07433	w	3	2017-07-01	0.270683	large	wet	0.0103933	0.101948
589	2651	moll	786	India	2	moll_225	Plant_4	24 C	69 % RH	S. b.	male	19	NA	0.3785	0.0380716	Left	Forewing	uns	int	98.7579	NA	1.8941	0.0421507	2	0.04792	w	3	2017-07-01	0.205306	large	wet	0.0208362	0.144347
590	2653	moll	787	India	2	moll_200	Plant_4	24 C	69 % RH	P. s.	male	27	NA	0.3786	0.0267935	Left	Forewing	uns	wet	102.336	NA	1.6074	0.0600151	3	0.07433	w	3	2017-06-23	0.24498	large	wet	0.0210704	0.145156
591	2655	moll	788	India	2	moll_223	Plant_4	24 C	69 % RH	R. c.	male	20	NA	0.4046	0.036981	Left	Forewing	uns	wet	106.014	NA	1.0267	0.0841852	3	0.07433	w	4	2017-07-01	0.290147	large	wet	0.00732607	0.0855925
592	2657	moll	789	India	2	moll_225	Plant_4	24 C	69 % RH	S. b.	male	20	NA	0.3352	0.0347327	Left	Forewing	uns	wet	91.556	NA	1.3048	0.0583481	3	0.07433	w	4	2017-07-01	0.241554	large	wet	0.00896683	0.0946934
593	2661	moll	790	India	2	moll_214	Plant_4	24 C	69 % RH	E. i.	female	24	8	0.4638	0.0322527	Left	Forewing	uns	wet	139.523	NA	3.0863	0.0661616	3	0.07433	w	3	2017-06-28	0.257219	large	wet	0.0232971	0.152634
594	2663	moll	791	India	2	moll_219	Plant_4	24 C	69 % RH	O. c.	female	24	NA	0.3787	0.0301454	Left	Forewing	uns	wet	122.077	NA	2.7211	0.092396	4	0.09885	w	4	2017-06-28	0.303967	large	wet	0.0224245	0.149748
595	2665	moll	792	India	2	moll_217	Plant_4	24 C	69 % RH	E. i.	male	23	NA	0.4433	0.0331516	Left	Forewing	uns	wet	112.273	NA	NA	0.0748447	4	0.09885	w	3	2017-06-28	0.273578	large	wet	NA	NA
596	2667	moll	793	India	2	moll_200	Plant_4	24 C	69 % RH	P. s.	male	28	NA	0.4234	0.026818	Left	Forewing	uns	wet	104.222	NA	1.2108	0.0599292	3	0.07433	w	3	2017-06-23	0.244804	large	wet	0.0128162	0.113209
597	2669	moll	794	India	2	moll_205	Plant_4	24 C	69 % RH	M. r.	male	26	NA	0.3626	0.0274264	Left	Forewing	uns	wet	95.6828	NA	1.1435	0.0661998	3	0.07433	w	4	2017-06-25	0.257293	large	wet	0.0117337	0.108322
598	2671	moll	795	India	2	moll_212	Plant_4	24 C	69 % RH	A. c.	female	23	NA	0.3837	0.0315939	Left	Forewing	uns	wet	116.972	NA	1.9636	0.0931996	4	0.09885	w	4	2017-06-28	0.305286	large	wet	0.0165614	0.128691
599	2673	moll	796	India	2	moll_225	Plant_4	24 C	69 % RH	S. b.	female	20	NA	0.3652	0.0357394	Left	Forewing	uns	wet	109.686	NA	1.9145	0.0678731	3	0.07433	w	4	2017-07-01	0.260525	large	wet	0.0151238	0.122979
600	2675	moll	797	India	2	moll_230	Plant_4	24 C	69 % RH	R. c.	female	18	NA	0.384	0.0403805	Left	Forewing	uns	wet	110.793	NA	1.1307	0.0512147	3	0.07433	w	4	2017-07-03	0.226307	large	wet	0.00971423	0.0985608
601	2677	moll	798	India	2	moll_216	Plant_4	24 C	69 % RH	S. b.	female	23	NA	0.4109	0.0323234	Left	Forewing	uns	wet	126.859	NA	2.3645	0.0768045	3	0.07433	w	4	2017-06-28	0.277136	large	wet	0.0206519	0.143708
602	2679	moll	799	India	2	moll_230	Plant_4	24 C	69 % RH	R. c.	male	18	NA	0.4852	0.043655	Left	Forewing	uns	wet	116.36	NA	1.2168	0.0678434	3	0.07433	w	4	2017-07-03	0.260468	large	wet	0.00945444	0.0972339
603	2685	moll	800	India	2	moll_217	Plant_4	24 C	69 % RH	E. i.	female	23	NA	0.46	0.0335628	Left	Forewing	uns	wet	123.467	NA	1.9903	0.0912813	4	0.09885	w	4	2017-06-28	0.302128	large	wet	0.0228105	0.151031
604	2687	moll	801	India	2	moll_217	Plant_4	24 C	69 % RH	E. i.	female	23	NA	0.4717	0.033845	Left	Forewing	uns	wet	120.346	NA	2.0684	0.0868757	3	0.07433	w	4	2017-06-28	0.294747	large	wet	0.0255051	0.159703
605	2689	moll	802	India	2	moll_213	Plant_4	24 C	69 % RH	P. p.	female	24	8	0.3186	0.028458	Left	Forewing	uns	wet	106.4	NA	1.6921	0.0629289	3	0.07433	w	4	2017-06-28	0.250856	large	wet	0.0183904	0.135611
606	2691	moll	803	India	2	moll_213	Plant_4	24 C	69 % RH	P. p.	female	24	9	0.3791	0.030156	Left	Forewing	uns	wet	118.101	NA	2.5846	0.045332	3	0.07433	w	4	2017-06-28	0.212913	large	wet	0.033561	0.183197
607	2693	moll	804	India	2	moll_215	Plant_4	24 C	69 % RH	P. p.	female	25	9	0.5045	0.031843	Left	Forewing	uns	wet	136.286	NA	3.1572	0.0744076	3	0.07433	d	4	2017-06-28	0.272778	large	wet	0.0284969	0.16881
608	2695	moll	805	India	2	moll_216	Plant_4	24 C	69 % RH	S. b.	male	24	NA	0.4323	0.0315053	Left	Forewing	uns	wet	119.103	NA	1.8954	0.0659068	3	0.07433	w	4	2017-06-28	0.256723	large	wet	0.0181468	0.13471
609	2697	moll	807	India	2	moll_215	Plant_4	24 C	69 % RH	P. p.	male	25	NA	0.4471	0.0305864	Left	Forewing	uns	wet	121.199	NA	2.4511	0.0630406	3	0.07433	w	3	2017-06-28	0.251079	large	wet	0.0321785	0.179384
610	2699	moll	808	India	2	moll_217	Plant_4	24 C	69 % RH	E. i.	male	24	8	0.4451	0.0318132	Left	Forewing	uns	int	108.218	NA	1.179	0.0425384	2	0.04792	w	3	2017-06-28	0.206248	large	wet	0.0158747	0.125995
611	2701	moll	809	India	2	moll_231	Plant_4	24 C	69 % RH	R. c.	male	16	8	0.4226	0.0469018	Left	Forewing	uns	wet	102.76	NA	0.888	0.1252	4	0.09885	w	4	2017-07-06	0.353837	large	wet	0.0069976	0.0836517
612	2705	moll	810	India	2	moll_207	Plant_4	24 C	69 % RH	O. c.	male	28	8	0.3443	0.0250315	Left	Forewing	uns	int	105.916	NA	2.1603	0.041751	2	0.04792	w	3	2017-06-25	0.204331	large	wet	0.0183458	0.135447
613	2707	moll	811	India	2	moll_230	Plant_4	24 C	69 % RH	R. c.	female	20	NA	0.4323	0.0378064	Left	Forewing	uns	wet	126.66	NA	2.5791	0.083002	3	0.07433	w	4	2017-07-03	0.288101	large	wet	0.0303276	0.174148
614	2709	moll	812	India	2	moll_233	Plant_4	24 C	69 % RH	E. i.	male	18	8	0.4944	0.0439292	Left	Forewing	uns	wet	81.8991	NA	NA	0.0831584	3	0.07433	w	4	2017-07-06	0.288372	large	wet	NA	NA
615	2711	moll	813	India	2	moll_215	Plant_4	24 C	69 % RH	P. p.	female	26	8	0.5014	0.0305554	Left	Forewing	uns	int	139.053	NA	3.4445	0.052996	2	0.04792	d	3	2017-06-28	0.230209	large	wet	0.0388422	0.197084
616	2713	moll	814	India	2	moll_229	Plant_4	24 C	69 % RH	A. c.	male	22	8	0.3064	0.0306436	Left	Forewing	uns	wet	93.1888	NA	1.2165	0.069944	3	0.07433	w	4	2017-07-03	0.264469	large	wet	0.0131394	0.114627
617	2715	moll	815	India	2	moll_222	Plant_4	24 C	69 % RH	O. c.	male	26	NA	0.2145	0.0230234	Left	Forewing	uns	int	NA	NA	NA	NA	2	0.04792	3	3	2017-06-29	NA	NA	wet	NA	NA
618	2717	moll	816	India	2	moll_233	Plant_4	24 C	69 % RH	E. i.	female	19	6	0.423	0.0395087	Left	Forewing	uns	wet	121.599	NA	1.5338	0.0847292	3	0.07433	w	4	2017-07-06	0.291083	large	wet	0.0161867	0.127227
619	2719	moll	817	India	2	moll_233	Plant_4	24 C	69 % RH	E. i.	male	19	8	0.3808	0.0381486	Left	Forewing	uns	wet	98.8763	NA	0.7962	0.114603	4	0.09885	w	4	2017-07-06	0.338531	large	wet	0.00873882	0.0934816
620	2721	moll	818	India	2	moll_231	Plant_4	24 C	69 % RH	R. c.	male	18	7	0.4182	0.0415453	Left	Forewing	uns	wet	109.548	NA	0.9033	0.107472	4	0.09885	w	4	2017-07-06	0.32783	large	wet	0.0110677	0.105203
621	2723	moll	819	India	2	moll_207	Plant_4	24 C	69 % RH	O. c.	female	30	8	0.4041	0.0246438	Left	Forewing	uns	wet	113.241	NA	2.7489	0.0640847	3	0.07433	w	4	2017-06-25	0.25315	large	wet	0.034187	0.184897
622	2727	moll	820	India	2	moll_231	Plant_4	24 C	69 % RH	R. c.	male	18	7	0.4511	0.0426074	Left	Forewing	uns	wet	105.881	NA	0.5056	0.076335	3	0.07433	w	4	2017-07-06	0.276288	large	wet	0.00559192	0.0747791
623	2729	moll	821	India	2	moll_212	Plant_4	24 C	69 % RH	A. c.	female	26	8	0.4285	0.0289964	Left	Forewing	uns	wet	120.297	NA	2.6644	0.0630321	3	0.07433	w	4	2017-06-28	0.251062	large	wet	0.028526	0.168896
624	2731	moll	822	India	2	moll_222	Plant_4	24 C	69 % RH	O. c.	female	26	8	0.4312	0.0290571	Left	Forewing	uns	wet	128.963	NA	2.2709	0.0931101	4	0.09885	w	4	2017-06-29	0.305139	large	wet	0.0193609	0.139144
625	2733	moll	823	India	2	moll_215	Plant_4	24 C	69 % RH	P. p.	male	28	8	0.419	0.0267247	Left	Forewing	uns	wet	118.425	NA	2.3321	0.0501249	3	0.07433	w	3	2017-06-28	0.223886	large	wet	0.0191769	0.138481
626	2735	moll	824	India	2	moll_204	Plant_4	24 C	69 % RH	O. t.	female	32	5	0.3327	0.0216538	Left	Forewing	uns	wet	105.945	NA	2.4224	0.0589659	3	0.07433	w	3	2017-06-24	0.242829	large	wet	0.0211441	0.14541
627	2737	moll	825	India	2	moll_229	Plant_4	24 C	69 % RH	A. c.	male	23	8	0.3488	0.0306054	Left	Forewing	uns	int	104.79	NA	1.8721	0.0444514	2	0.04792	w	3	2017-07-03	0.210835	large	wet	0.0170884	0.130722
628	2739	moll	826	India	2	moll_228	Plant_4	24 C	69 % RH	R. c.	male	23	7	0.2688	0.0280596	Left	Forewing	uns	wet	85.8423	NA	1.8151	0.0668122	3	0.07433	w	3	2017-07-03	0.25848	large	wet	0.0202633	0.142349
629	2741	moll	827	India	2	moll_233	Plant_4	24 C	69 % RH	E. i.	male	20	7	0.3663	0.0357752	Left	Forewing	uns	wet	98.571	NA	1.1594	0.0773622	3	0.07433	w	4	2017-07-06	0.278141	large	wet	0.0139987	0.118316
630	2743	moll	828	India	2	moll_222	Plant_4	24 C	69 % RH	O. c.	male	28	8	0.4342	0.0270441	Left	Forewing	uns	wet	115.442	NA	1.4757	0.0784552	3	0.07433	w	4	2017-06-29	0.280099	large	wet	0.0117462	0.10838
631	2745	moll	829	India	2	moll_211	Plant_4	24 C	69 % RH	P. p.	female	30	8	0.4314	0.0251868	Left	Forewing	uns	wet	125.815	NA	2.8047	0.0988441	4	0.09885	w	4	2017-06-26	0.314395	large	wet	0.0217264	0.147399
632	2749	moll	830	India	2	moll_204	Plant_4	24 C	69 % RH	O. t.	female	35	7	0.4115	0.0212515	Left	Forewing	uns	wet	100.249	NA	3.5435	0.086018	3	0.07433	d	4	2017-06-24	0.293288	large	wet	0.0356172	0.188725
633	2751	moll	831	India	2	moll_232	Plant_4	24 C	69 % RH	R. c.	female	23	7	0.4249	0.0326864	Left	Forewing	uns	wet	120.589	NA	1.4422	0.0968825	3	0.07433	w	4	2017-07-06	0.31126	large	wet	0.0142679	0.119449
634	2753	moll	832	India	2	moll_232	Plant_4	24 C	69 % RH	R. c.	male	23	8	0.4177	0.0325008	Left	Forewing	uns	wet	115.59	NA	1.3781	0.0853642	3	0.07433	w	4	2017-07-06	0.292172	large	wet	0.0129155	0.113646
635	2755	moll	834	India	2	moll_240	Plant_4	24 C	69 % RH	E. unid	female	24	10	0.2952	0.0277435	Left	Forewing	uns	wet	104.35	NA	2.9359	0.0735671	3	0.07433	w	4	2017-07-19	0.271233	large	wet	0.0281986	0.167925
636	2757	moll	837	India	2	moll_244	Plant_4	24 C	69 % RH	M. r.	male	22	8	0.379	0.0328945	Left	Forewing	uns	wet	101.292	NA	0.6362	0.0757523	3	0.07433	w	4	2017-07-21	0.275231	large	wet	0.00547004	0.0739597
637	2759	moll	838	India	2	moll_243	Plant_4	24 C	69 % RH	M. r.	male	22	8	0.4067	0.0336772	Left	Forewing	uns	wet	115.096	NA	0.6318	0.081416	3	0.07433	w	4	2017-07-21	0.285335	large	wet	0.00553601	0.0744043
638	2761	moll	839	India	2	moll_238	Plant_4	24 C	69 % RH	S. b.	male	24	9	0.378	0.0301268	Left	Forewing	uns	wet	NA	NA	NA	0.0693917	3	0.07433	w	4	2017-07-19	0.263423	large	wet	NA	NA
639	2763	moll	840	India	2	moll_239	Plant_4	24 C	69 % RH	P. p.	male	21	8	0.4237	0.0357657	Left	Forewing	uns	wet	110.654	NA	0.5539	0.0878545	4	0.09885	w	4	2017-07-19	0.296403	large	wet	0.00554284	0.0744502
640	2765	moll	841	India	2	moll_243	Plant_4	24 C	69 % RH	M. r.	male	22	7	0.3821	0.032984	Left	Forewing	uns	wet	107.929	NA	0.4048	0.0927686	4	0.09885	w	4	2017-07-21	0.304579	large	wet	0.00425989	0.0652678
641	2767	moll	844	India	2	moll_244	Plant_4	24 C	69 % RH	M. r.	male	22	8	0.365	0.0324844	Left	Forewing	uns	wet	103.931	NA	0.8075	0.0736323	3	0.07433	w	4	2017-07-21	0.271353	large	wet	0.00883695	0.0940051
642	2769	moll	845	India	2	moll_242	Plant_4	24 C	69 % RH	B. mu.	female	27	7	0.3312	0.0256251	Left	Forewing	uns	wet	105.474	NA	3.2952	0.0950458	3	0.07433	d	4	2017-07-19	0.308295	large	wet	0.034409	0.185497
643	2771	moll	846	India	2	moll_241	Plant_4	24 C	69 % RH	B. mu.	female	26	8	0.3663	0.0275194	Left	Forewing	uns	wet	122.895	NA	4.5004	0.0672636	3	0.07433	d	3	2017-07-19	0.259352	large	wet	0.046842	0.21643
644	2773	moll	847	India	2	moll_235	Plant_4	24 C	69 % RH	E. unid	male	27	9	0.3618	0.0263912	Left	Forewing	uns	wet	106.321	NA	0.7558	0.0763812	3	0.07433	w	4	2017-07-19	0.276371	large	wet	0.00718929	0.0847897
645	2775	moll	848	India	2	moll_242	Plant_4	24 C	69 % RH	B. mu.	male	26	9	0.2442	0.0240404	Left	Forewing	uns	wet	78.5717	NA	1.4852	0.0672448	3	0.07433	w	3	2017-07-19	0.259316	large	wet	0.0147025	0.121254
646	2777	moll	849	India	2	moll_239	Plant_4	24 C	69 % RH	P. p.	female	26	8	0.3714	0.0276465	Left	Forewing	uns	wet	112.269	NA	3.7295	0.0758989	3	0.07433	w	4	2017-07-19	0.275498	large	wet	0.0392423	0.198097
647	2781	moll	850	India	2	moll_239	Plant_4	24 C	69 % RH	P. p.	female	26	6	0.4172	0.0287392	Left	Forewing	uns	wet	119.365	NA	3.4318	0.0606301	3	0.07433	d	3	2017-07-19	0.246232	large	wet	0.0363084	0.190548
648	2783	moll	851	India	2	moll_239	Plant_4	24 C	69 % RH	P. p.	female	26	8	0.3896	0.0280909	Left	Forewing	uns	wet	103.316	NA	NA	0.0735397	3	0.07433	w	3	2017-07-19	0.271182	large	wet	NA	NA
649	2785	moll	852	India	2	moll_239	Plant_4	24 C	69 % RH	P. p.	female	27	9	0.3355	0.0257356	Left	Forewing	uns	int	114.148	NA	3.5669	0.0503985	2	0.04792	d	3	2017-07-19	0.224496	large	wet	0.0256606	0.160189
650	2787	moll	853	India	2	moll_234	Plant_4	24 C	69 % RH	E. unid	male	26	8	0.3454	0.0269857	Left	Forewing	uns	wet	104.275	NA	0.8991	0.0972063	3	0.07433	w	3	2017-07-19	0.311779	large	wet	0.00633896	0.0796176
651	2789	moll	854	India	2	moll_234	Plant_4	24 C	69 % RH	E. unid	female	28	8	0.3942	0.0261867	Left	Forewing	uns	wet	123.443	NA	1.98	0.0988975	4	0.09885	w	4	2017-07-19	0.31448	large	wet	0.0165841	0.128779
652	2791	moll	855	India	2	moll_244	Plant_4	24 C	69 % RH	M. r.	male	27	8	0.3956	0.0271887	Left	Forewing	uns	wet	111.199	NA	1.3967	0.0550806	3	0.07433	w	4	2017-07-21	0.234693	large	wet	0.0116358	0.10787
653	2793	moll	857	India	2	moll_237	Plant_4	24 C	69 % RH	E. unid	female	28	9	0.2838	0.02347	Left	Forewing	uns	wet	95.1648	NA	2.1528	0.108372	3	0.07433	w	4	2017-07-19	0.329199	large	wet	0.0174745	0.132191
654	2795	moll	858	India	2	moll_240	Plant_4	24 C	69 % RH	E. unid	male	28	8	0.2867	0.0235497	Left	Forewing	uns	dry	93.4332	NA	2.648	0.0306952	1	0.02026	d	2	2017-07-19	0.175201	large	wet	0.0218244	0.147731
655	2799	moll	860	India	2	moll_237	Plant_4	24 C	69 % RH	E. unid	female	29	NA	0.3127	0.0234051	Left	Forewing	uns	wet	NA	NA	2.9189	NA	3	0.07433	w	4	2017-07-19	NA	NA	wet	0.0261668	0.161762
656	2801	moll	861	India	2	moll_237	Plant_4	24 C	69 % RH	E. unid	male	31	9	0.3899	0.0235662	Left	Forewing	uns	int	114.041	NA	2.9706	0.0420043	2	0.04792	w	3	2017-07-19	0.204949	large	wet	0.0277722	0.16665
657	2803	moll	862	India	2	moll_237	Plant_4	24 C	69 % RH	E. unid	female	30	9	0.3357	0.0231666	Left	Forewing	uns	wet	102.974	NA	2.6189	0.0884234	3	0.07433	d	3	2017-07-19	0.297361	large	wet	0.022331	0.149436
658	2805	moll	863	India	2	moll_236	Plant_4	24 C	69 % RH	E. unid	female	30	NA	0.3317	0.0230742	Left	Forewing	uns	wet	106.019	NA	2.8606	0.080851	3	0.07433	w	4	2017-07-19	0.284343	large	wet	0.0243441	0.156026
659	2807	moll	864	India	2	moll_234	Plant_4	24 C	69 % RH	E. unid	male	31	9	0.3779	0.0233219	Left	Forewing	uns	wet	105.989	NA	1.1335	0.081025	3	0.07433	w	4	2017-07-19	0.284649	large	wet	0.0106779	0.103334
660	2809	moll	865	India	2	moll_235	Plant_4	24 C	69 % RH	E. unid	female	31	8	0.2569	0.0205066	Left	Forewing	uns	wet	89.8196	NA	2.0192	0.0846713	3	0.07433	w	4	2017-07-19	0.290983	large	wet	0.0184733	0.135917
661	2811	moll	866	India	2	moll_237	Plant_4	24 C	69 % RH	E. unid	female	31	9	0.3556	0.0228538	Left	Forewing	uns	dry	NA	NA	2.2688	NA	1	0.02026	d	2	2017-07-19	NA	NA	dry	0.0258355	0.160734
662	2813	moll	867	India	2	moll_235	Plant_4	24 C	69 % RH	E. unid	female	30	9	0.3328	0.0230997	Left	Forewing	uns	wet	113.25	NA	2.5746	0.0951437	4	0.09885	w	4	2017-07-19	0.308454	large	wet	0.0301867	0.173743
663	2815	moll	869	India	2	moll_247	Plant_4	24 C	69 % RH	C. f.	female	25	8	0.2475	0.0251141	Left	Forewing	uns	int	87.279	NA	2.5942	0.0627072	2	0.04792	d	3	2017-07-29	0.250414	large	wet	0.0261712	0.161775
664	2819	moll	870	India	2	moll_243.1	Plant_4	24 C	69 % RH	C. h..	male	24	9	0.2737	0.0270529	Left	Forewing	uns	wet	83.8169	NA	1.6865	0.066713	3	0.07433	w	4	2017-07-29	0.258289	large	wet	0.0174673	0.132164
665	2821	moll	871	India	2	moll_247	Plant_4	24 C	69 % RH	C. f.	female	26	8	0.358	0.02731	Left	Forewing	uns	int	114.43	NA	3.6218	0.0642256	2	0.04792	d	3	2017-07-29	0.253428	large	wet	0.0376538	0.194046
666	2823	moll	872	India	2	moll_247	Plant_4	24 C	69 % RH	C. f.	male	26	8	0.3063	0.0259264	Left	Forewing	uns	int	101.187	NA	3.3998	0.0355219	2	0.04792	d	3	2017-07-29	0.188473	large	wet	0.036857	0.191982
667	2825	moll	873	India	2	moll_247	Plant_4	24 C	69 % RH	C. f.	male	26	8	0.2469	0.0241287	Left	Forewing	uns	int	82.306	NA	1.9529	0.0449387	2	0.04792	d	3	2017-07-29	0.211987	large	wet	0.0187627	0.136977
668	2827	moll	874	India	2	moll_247	Plant_4	24 C	69 % RH	C. f.	male	25	9	0.2649	0.0256894	Left	Forewing	uns	int	89.9871	NA	1.7165	0.0581058	2	0.04792	d	3	2017-07-29	0.241051	large	wet	0.0164194	0.128138
669	2829	moll	875	India	2	moll_247	Plant_4	24 C	69 % RH	C. f.	male	29	9	0.3043	0.0231937	Left	Forewing	uns	int	96.9866	NA	2.2572	NA	2	0.04792	d	3	2017-07-29	NA	NA	wet	0.0248176	0.157536
670	2831	moll	876	India	2	moll_247	Plant_4	24 C	69 % RH	C. f.	male	29	7	0.3265	0.0237445	Left	Forewing	uns	int	111.232	NA	3.7844	0.0624313	3	0.07433	d	2	2017-07-29	0.249863	large	wet	0.0460036	0.214484
671	2833	moll	877	India	2	moll_247	Plant_4	24 C	69 % RH	C. f.	male	29	8	0.346	0.0242081	Left	Forewing	uns	wet	113.186	NA	2.611	0.0765955	3	0.07433	d	2	2017-07-29	0.276759	large	wet	0.0243566	0.156066
672	2835	moll	878	India	2	moll_243.1	Plant_4	24 C	69 % RH	C. h..	female	32	7	0.3513	0.02205	Left	Forewing	uns	int	110.124	NA	3.5712	0.0482515	2	0.04792	w	4	2017-07-29	0.219662	large	wet	0.0355259	0.188483
673	2837	moll	879	India	2	moll_247	Plant_4	24 C	69 % RH	C. f.	male	31	8	0.3088	0.0218037	Left	Forewing	uns	int	102.085	NA	2.9866	0.0532791	2	0.04792	d	3	2017-07-29	0.230823	large	wet	0.0263521	0.162333
674	2841	moll	880	India	2	moll_243.1	Plant_4	24 C	69 % RH	C. h..	male	31	8	0.3231	0.0221352	Left	Forewing	uns	int	103.079	NA	3.1908	0.0340265	2	0.04792	d	2	2017-07-29	0.184463	large	wet	0.0281285	0.167716
675	2843	moll	881	India	2	moll_247	Plant_4	24 C	69 % RH	C. f.	male	34	8	0.3921	0.0215272	Left	Forewing	uns	int	108.224	NA	2.7369	0.0502224	2	0.04792	d	3	2017-07-29	0.224104	large	wet	0.0249413	0.157928
676	2845	moll	882	India	2	moll_247	Plant_4	24 C	69 % RH	C. f.	female	37	NA	0.3766	0.0195175	Left	Forewing	uns	wet	NA	NA	NA	0.061258	3	0.07433	w	3	2017-07-29	0.247504	large	wet	NA	NA
677	2847	moll	883	India	2	moll_245	Plant_4	24 C	69 % RH	C. h..	female	37	NA	0.1721	0.0150334	Left	Forewing	uns	wet	117.391	NA	2.1879	0.0682407	3	0.07433	w	4	2017-07-29	0.261229	large	wet	0.0176947	0.133021
678	2849	moll	884	India	2	moll_251	Plant_4	24 C	69 % RH	M. r.	female	21	7	0.4144	0.0355021	Left	Forewing	uns	wet	125.614	NA	1.6379	0.110931	3	0.07433	w	3	2017-09-02	0.333064	large	wet	0.0131858	0.11483
679	2851	moll	885	India	2	moll_251	Plant_4	24 C	69 % RH	M. r.	male	21	7	0.4239	0.0357713	Left	Forewing	uns	wet	107.363	NA	0.8403	0.0927301	3	0.07433	w	4	2017-09-02	0.304516	large	wet	0.00618874	0.0786685
680	2853	moll	886	India	2	moll_251	Plant_4	24 C	69 % RH	M. r.	female	20	7	0.3757	0.0360787	Left	Forewing	uns	wet	110.477	NA	1.7822	0.0964083	3	0.07433	w	4	2017-09-02	0.310497	large	wet	0.0131687	0.114755
681	2855	moll	887	India	2	moll_251	Plant_4	24 C	69 % RH	M. r.	male	21	7	0.4064	0.0352722	Left	Forewing	uns	wet	102.289	NA	0.8878	0.0777463	3	0.07433	w	4	2017-09-02	0.27883	large	wet	0.00855067	0.0924698
682	2857	moll	888	India	2	moll_251	Plant_4	24 C	69 % RH	M. r.	female	20	8	0.3738	0.0360177	Left	Forewing	uns	wet	NA	NA	NA	0.111014	3	0.07433	w	4	2017-09-02	0.333188	large	wet	NA	NA
683	2859	moll	889	India	2	moll_251	Plant_4	24 C	69 % RH	M. r.	male	21	7	0.3582	0.0338186	Left	Forewing	uns	wet	99.1842	NA	0.9773	0.0859554	3	0.07433	w	4	2017-09-02	0.293181	large	wet	0.00814758	0.090264
684	2863	moll	890	India	2	moll_251	Plant_4	24 C	69 % RH	M. r.	male	21	7	0.4046	0.03522	Left	Forewing	uns	wet	96.3649	NA	0.9147	0.0827514	3	0.07433	w	4	2017-09-02	0.287665	large	wet	0.00767792	0.0876238
685	2865	moll	891	India	2	moll_252	Plant_4	24 C	69 % RH	E. unid	male	24	8	0.222	0.0252294	Left	Forewing	uns	int	75.0781	NA	1.029	0.0677043	2	0.04792	w	4	2017-09-02	0.260201	large	wet	0.00839725	0.0916365
686	2867	moll	892	India	2	moll_252	Plant_4	24 C	69 % RH	E. unid	female	23	7	0.2626	0.0278422	Left	Forewing	uns	wet	91.0477	NA	1.4945	0.0785216	3	0.07433	w	4	2017-09-02	0.280217	large	wet	0.0124462	0.111563
687	2869	moll	893	India	2	moll_251	Plant_4	24 C	69 % RH	M. r.	male	24	9	0.4039	0.0307997	Left	Forewing	uns	wet	120.926	NA	2.1779	0.0746177	3	0.07433	w	4	2017-09-02	0.273162	large	wet	0.0285777	0.169049
688	2871	moll	894	India	2	moll_251	Plant_4	24 C	69 % RH	M. r.	female	23	7	0.3655	0.0310862	Left	Forewing	uns	wet	121.195	NA	2.4679	0.0772514	3	0.07433	w	3	2017-09-02	0.277941	large	wet	0.0194023	0.139292
689	2873	moll	895	India	2	moll_252	Plant_4	24 C	69 % RH	E. unid	male	25	8	0.3026	0.0268545	Left	Forewing	uns	wet	92.9214	NA	1.8724	0.0674635	3	0.07433	w	4	2017-09-02	0.259737	large	wet	0.0158163	0.125763
690	2875	moll	896	India	2	moll_251	Plant_4	24 C	69 % RH	M. r.	female	25	8	0.4539	0.0307407	Left	Forewing	uns	wet	122.681	NA	1.8629	0.0909515	3	0.07433	w	4	2017-09-02	0.301582	large	wet	0.0167759	0.129522
691	2877	moll	897	India	2	moll_252	Plant_4	24 C	69 % RH	E. unid	male	25	8	0.2163	0.0240111	Left	Forewing	uns	int	72.6118	NA	1.5914	0.048057	2	0.04792	w	3	2017-09-02	0.219219	large	wet	0.0146514	0.121043
692	2879	moll	898	India	2	moll_252	Plant_4	24 C	69 % RH	E. unid	male	25	8	0.2469	0.0250938	Left	Forewing	uns	int	80.5961	NA	1.7507	0.0418455	2	0.04792	w	3	2017-09-02	0.204562	large	wet	0.017081	0.130694
693	2881	moll	899	India	2	moll_251	Plant_4	24 C	69 % RH	M. r.	female	25	8	0.3898	0.0292196	Left	Forewing	uns	wet	116.002	NA	2.355	0.0805997	3	0.07433	w	4	2017-09-02	0.283901	large	wet	0.0234247	0.153051
694	2885	moll	900	India	2	moll_251	Plant_4	24 C	69 % RH	M. r.	male	28	8	0.4531	0.0274309	Left	Forewing	uns	wet	107.331	NA	1.0397	0.071203	3	0.07433	w	4	2017-09-02	0.266839	large	wet	0.0108235	0.104036
695	609	moore	25-05-01	Ghana	2	moore_5.1	Temp_1	25 C	75 % RH	Z. m. y	male	22	12	0.4153	0.0339129	Left	Forewing	ups	wet	94.9823	0.3672	1.037	0.0183308	NA	NA	NA	NA	100	0.135391	small	dry	0.0110322	0.105034
696	454	moore	25-05-02	Ghana	2	moore_5.1	Temp_1	25 C	75 % RH	Z. m. y	female	22	11	0.4671	0.035268	Right	Forewing	uns	wet	135.194	0.8142	2.957	0.0249378	NA	NA	NA	NA	100	0.157917	large	wet	0.0336848	0.183534
697	597	moore	25-05-03	Ghana	2	moore_5.1	Temp_1	25 C	75 % RH	Z. m. y	female	22	11	0.4375	0.0345067	Left	Forewing	ups	wet	128.269	0.75145	2.6196	0.0145523	NA	NA	NA	NA	100	0.120633	small	dry	0.0297488	0.172479
698	675	moore	25-05-05	Ghana	2	moore_5.1	Temp_1	25 C	75 % RH	Z. m. y	female	23	10	0.5538	0.0357045	Left	Forewing	ups	dry	157.03	1.2791	4.40175	0.00644926	NA	NA	NA	NA	100	0.0803073	small	dry	0.0426154	0.206435
699	960	moore	25-05-06	Ghana	2	moore_5.1	Temp_1	25 C	75 % RH	Z. m. y	male	23	10	0.5225	0.0350188	Right	Forewing	uns	dry	138.412	0.73055	2.3511	0.00225961	NA	NA	NA	NA	100	0.0475353	small	dry	0.0234743	0.153213
700	692	moore	25-05-07	Ghana	2	moore_5.1	Temp_1	25 C	75 % RH	Z. m. y	female	24	10	0.5397	0.0339239	Left	Forewing	ups	dry	155.209	1.2465	4.50925	0.0060591	NA	NA	NA	NA	100	0.0778402	small	dry	0.0391401	0.197839
701	3	moore	25-05-08	Ghana	2	moore_5.1	Temp_1	25 C	75 % RH	Z. m. y	male	24	10	0.5594	0.0343318	Right	Forewing	uns	dry	150.109	0.8139	2.7206	0.00135153	NA	NA	NA	NA	100	0.0367631	small	dry	0.0230628	0.151864
702	957	moore	25-05-10	Ghana	2	moore_5.1	Temp_1	25 C	75 % RH	Z. m. y	male	24	10	0.5753	0.034654	Right	Forewing	uns	dry	148.053	0.9843	3.30235	0.00225976	NA	NA	NA	NA	100	0.047537	small	dry	0.0247559	0.15734
703	625	moore	25-05-11	Ghana	2	moore_5.1	Temp_1	25 C	75 % RH	Z. m. y	female	NA	NA	NA	NA	Left	Forewing	ups	dry	143.562	1.01595	3.75245	0.00821399	NA	NA	NA	NA	100	0.0906311	small	dry	0.02763	0.166223
704	832	moore	25-05-12	Ghana	2	moore_5.1	Temp_1	25 C	75 % RH	Z. m. y	male	26	9	0.4998	0.0305229	Left	Forewing	ups	dry	136.753	0.7368	2.40175	0.00458202	NA	NA	NA	NA	100	0.0676906	small	dry	0.0195534	0.139834
705	784	moore	25-05-13	Ghana	2	moore_5.1	Temp_1	25 C	75 % RH	Z. m. y	female	27	10	0.4691	0.0287778	Left	Forewing	ups	dry	146.901	1.1786	4.5678	0.00483629	NA	NA	NA	NA	100	0.0695434	small	dry	0.0365346	0.19114
706	627	moore	25-05-14	Ghana	2	moore_5.1	Temp_1	25 C	75 % RH	Z. m. y	female	28	9	0.4079	0.0264866	Right	Forewing	uns	int	129.371	0.9504	3.1396	0.00964771	NA	NA	NA	NA	100	0.0982228	small	dry	0.0230176	0.151716
707	978	moore	25-06-01	Ghana	3	moore_6.2	Temp_2	25 C	75 % RH	Z. m. y	female	21	9	0.5634	0.0393296	Left	Forewing	ups	dry	161.737	1.3292	4.985	0.00334376	NA	NA	NA	NA	154	0.0578253	small	dry	0.0381645	0.195357
708	708	moore	25-06-01a	Ghana	2	moore_6.1	Temp_1	25 C	75 % RH	Z. m. y	female	22	10	0.5523	0.0372937	Left	Forewing	ups	dry	160.591	1.29375	4.5936	0.00494159	NA	NA	NA	NA	101	0.0702964	small	dry	0.0418425	0.204554
709	66	moore	25-06-02	Ghana	3	moore_6.2	Temp_2	25 C	75 % RH	Z. m. y	male	22	10	0.5257	0.0366851	Right	Forewing	uns	dry	145.439	0.77085	2.4884	0.00464722	NA	NA	NA	NA	154	0.0681706	small	dry	0.0232234	0.152392
710	691	moore	25-06-02a	Ghana	2	moore_6.1	Temp_1	25 C	75 % RH	Z. m. y	male	23	10	0.5065	0.0346576	Left	Forewing	ups	dry	125.671	0.7101	2.66025	0.00639643	NA	NA	NA	NA	101	0.0799777	small	dry	0.0228894	0.151293
711	779	moore	25-06-03	Ghana	2	moore_6.1	Temp_1	25 C	75 % RH	Z. m. y	male	23	9	0.4429	0.0331416	Right	Forewing	uns	dry	111.903	0.7149	2.4935	0.00633634	NA	NA	NA	NA	101	0.0796011	small	dry	0.0201005	0.141776
712	67	moore	25-06-03a	Ghana	3	moore_6.2	Temp_2	25 C	75 % RH	Z. m. y	female	22	8	0.5588	0.0374394	Right	Forewing	uns	dry	170.09	1.5027	5.4363	0.00391558	NA	NA	NA	NA	154	0.0625746	small	dry	0.0544326	0.233308
713	115	moore	25-06-04	Ghana	3	moore_6.2	Temp_2	25 C	75 % RH	Z. m. y	female	22	8	0.5398	0.0370102	Left	Forewing	ups	dry	157.635	1.21475	5.32365	0.00441484	NA	NA	NA	NA	154	0.0664442	small	dry	0.0532191	0.230693
714	1014	moore	25-06-05	Ghana	3	moore_6.2	Temp_2	25 C	75 % RH	Z. m. y	male	22	8	0.5099	0.0363139	Right	Forewing	uns	dry	132.89	0.67275	2.89415	0.0079832	NA	NA	NA	NA	154	0.0893488	small	dry	0.0263926	0.162458
715	688	moore	25-06-05a	Ghana	2	moore_6.1	Temp_1	25 C	75 % RH	Z. m. y	male	24	10	0.5331	0.0337851	Left	Forewing	ups	dry	145.565	0.93035	3.23095	0.00650868	NA	NA	NA	NA	101	0.0806764	small	dry	0.0303762	0.174288
716	60	moore	25-06-06	Ghana	3	moore_6.2	Temp_2	25 C	75 % RH	Z. m. y	male	24	9	0.5272	0.03366	Right	Forewing	uns	dry	140.216	1.06915	4.0966	0.0086966	NA	NA	NA	NA	154	0.0932555	small	dry	0.034729	0.186357
717	207	moore	25-06-06a	Ghana	2	moore_6.1	Temp_1	25 C	75 % RH	Z. m. y	female	26	7	0.546	0.0314358	Right	Forewing	uns	wet	135.281	0.7337	2.7092	0.0367602	NA	NA	NA	NA	101	0.19173	large	wet	0.022903	0.151337
718	1040	moore	25-06-07	Ghana	3	moore_6.2	Temp_2	25 C	75 % RH	Z. m. y	male	24	10	0.5586	0.0343154	Left	Forewing	ups	dry	163.33	1.2393	4.784	0.00460697	NA	NA	NA	NA	154	0.0678746	small	dry	0.0494697	0.222418
719	753	moore	25-06-07a	Ghana	2	moore_6.1	Temp_1	25 C	75 % RH	Z. m. y	male	NA	NA	NA	NA	Left	Forewing	ups	dry	150.198	1.0349	3.33975	0.00553073	NA	NA	NA	NA	101	0.0743689	small	dry	0.0358853	0.189434
720	105	moore	25-06-08	Ghana	3	moore_6.2	Temp_2	25 C	75 % RH	Z. m. y	male	24	10	0.5954	0.035053	Left	Forewing	ups	dry	160.171	0.89225	3.4034	0.00528534	NA	NA	NA	NA	154	0.0727004	small	dry	0.0347693	0.186465
721	808	moore	25-06-08a	Ghana	2	moore_6.1	Temp_1	25 C	75 % RH	Z. m. y	male	25	9	0.4625	0.0309336	Right	Forewing	uns	dry	134.208	0.67775	1.91005	0.0046622	NA	NA	NA	NA	101	0.0682803	small	dry	0.0218719	0.147891
722	6	moore	25-06-09	Ghana	3	moore_6.2	Temp_2	25 C	75 % RH	Z. m. y	male	25	10	0.612	0.0339607	Left	Forewing	ups	dry	159.833	1.2045	4.6551	NA	NA	NA	NA	NA	154	NA	NA	dry	0.0408944	0.202224
723	741	moore	25-06-09a	Ghana	2	moore_6.1	Temp_1	25 C	75 % RH	Z. m. y	female	26	9	0.4181	0.0287599	Right	Forewing	uns	dry	128.052	0.9972	3.34035	0.00622867	NA	NA	NA	NA	101	0.0789219	small	dry	0.0302071	0.173802
724	698	moore	25-06-10	Ghana	2	moore_6.1	Temp_1	25 C	75 % RH	Z. m. y	female	26	9	0.535	0.0312232	Right	Forewing	uns	dry	164.998	1.3816	4.5124	0.00567336	NA	NA	NA	NA	101	0.0753217	small	dry	0.038959	0.19738
725	22	moore	25-06-11	Ghana	3	moore_6.2	Temp_2	25 C	75 % RH	Z. m. y	male	25	10	0.5252	0.0322727	Left	Forewing	ups	dry	153.107	1.188	4.74195	0.00289777	NA	NA	NA	NA	154	0.053831	small	dry	0.0402325	0.20058
726	620	moore	25-06-11a	Ghana	2	moore_6.1	Temp_1	25 C	75 % RH	Z. m. y	female	NA	NA	0.4781	NA	Left	Forewing	ups	int	138.014	1.0338	3.6719	0.00925151	NA	NA	NA	NA	101	0.0961848	small	dry	0.0343824	0.185425
727	101	moore	25-06-12	Ghana	3	moore_6.2	Temp_2	25 C	75 % RH	Z. m. y	female	25	9	0.2959	0.0266548	Right	Forewing	uns	dry	92.5958	0.61685	2.4095	0.0115691	NA	NA	NA	NA	154	0.10756	small	dry	0.0242014	0.155568
728	75	moore	25-06-13	Ghana	3	moore_6.2	Temp_2	25 C	75 % RH	Z. m. y	male	29	10	0.6174	0.0293624	Left	Forewing	ups	dry	166.648	1.1056	4.1557	0.00479314	NA	NA	NA	NA	154	0.0692325	small	dry	0.0372479	0.192997
729	220	moore	25-06-13a	Ghana	2	moore_6.1	Temp_1	25 C	75 % RH	Z. m. y	male	NA	NA	NA	NA	Left	Forewing	ups	wet	97.1008	0.62145	2.3535	0.0498595	NA	NA	NA	NA	101	0.223292	large	wet	0.0235976	0.153615
730	1035	moore	25-07-01	Ghana	3	moore_7.2	Temp_2	25 C	75 % RH	Z. m. y	male	22	10	0.5161	0.0364604	Right	Forewing	uns	dry	157.056	1.0416	4.01285	0.00574116	NA	NA	NA	NA	154	0.0757705	small	dry	0.0405793	0.201443
731	990	moore	25-07-02	Ghana	3	moore_7.2	Temp_2	25 C	75 % RH	Z. m. y	male	22	10	0.46	0.0350884	Left	Forewing	ups	dry	137.191	1.14045	3.8976	0.0110257	NA	NA	NA	NA	154	0.105004	small	dry	0.0418257	0.204513
732	109	moore	25-07-03	Ghana	3	moore_7.2	Temp_2	25 C	75 % RH	Z. m. y	male	23	10	0.5334	0.0352606	Right	Forewing	uns	dry	144.452	0.72885	2.71165	0.0100042	NA	NA	NA	NA	154	0.100021	small	dry	0.0264412	0.162608
733	111	moore	25-07-04	Ghana	3	moore_7.2	Temp_2	25 C	75 % RH	Z. m. y	female	23	10	0.5623	0.0358863	Left	Forewing	ups	dry	166.4	1.2497	5.1474	0.00868149	NA	NA	NA	NA	154	0.0931745	small	dry	0.0548751	0.234254
734	1001	moore	25-07-05	Ghana	3	moore_7.2	Temp_2	25 C	75 % RH	Z. m. y	female	24	10	0.5615	0.0343747	Left	Forewing	ups	dry	171.608	1.2156	5.1061	0.0070164	NA	NA	NA	NA	154	0.0837639	small	dry	0.0507124	0.225194
735	1005	moore	25-07-06	Ghana	3	moore_7.2	Temp_2	25 C	75 % RH	Z. m. y	female	24	9	0.4786	0.0325921	Right	Forewing	uns	dry	144.55	0.97435	3.53995	0.00906392	NA	NA	NA	NA	154	0.0952046	small	dry	0.0392197	0.19804
736	1015	moore	25-07-07	Ghana	3	moore_7.2	Temp_2	25 C	75 % RH	Z. m. y	female	25	9	0.5358	0.0324883	Right	Forewing	uns	dry	166.69	1.29205	5.3315	0.00825945	NA	NA	NA	NA	154	0.0908815	small	dry	0.0540525	0.232492
737	23	moore	25-07-08	Ghana	3	moore_7.2	Temp_2	25 C	75 % RH	Z. m. y	male	25	10	0.5882	0.0335147	Left	Forewing	ups	dry	167.397	0.93315	3.7784	0.00634029	NA	NA	NA	NA	154	0.0796259	small	dry	0.0389638	0.197393
738	79	moore	25-07-09	Ghana	3	moore_7.2	Temp_2	25 C	75 % RH	Z. m. y	male	26	10	0.4181	0.0287599	Left	Forewing	ups	dry	127.85	0.8395	3.21485	0.00600056	NA	NA	NA	NA	154	0.0774633	small	dry	0.0294232	0.171532
739	69	moore	25-08-01	Ghana	3	moore_8.2	Temp_2	25 C	75 % RH	Z. m. y	female	22	8	0.6322	0.0390118	Right	Forewing	uns	dry	186.144	1.25625	4.9831	0.00497172	NA	NA	NA	NA	154	0.0705104	small	dry	0.048939	0.221222
740	61	moore	25-08-02	Ghana	3	moore_8.2	Temp_2	25 C	75 % RH	Z. m. y	female	23	9	0.4977	0.0344557	Right	Forewing	uns	dry	154.109	1.0109	4.57045	0.00879098	NA	NA	NA	NA	154	0.0937602	small	dry	0.0368546	0.191976
741	62	moore	25-08-03	Ghana	3	moore_8.2	Temp_2	25 C	75 % RH	Z. m. y	female	23	10	0.5952	0.0365729	Left	Forewing	ups	dry	173.281	1.515	5.96165	0.00609638	NA	NA	NA	NA	154	0.0780793	small	dry	0.0497314	0.223005
742	107	moore	25-08-04	Ghana	3	moore_8.2	Temp_2	25 C	75 % RH	Z. m. y	female	24	9	0.5017	0.0331083	Right	Forewing	uns	dry	162.357	1.1636	5.2477	0.00625708	NA	NA	NA	NA	154	0.0791017	small	dry	0.0530475	0.23032
743	29	moore	25-08-05	Ghana	3	moore_8.2	Temp_2	25 C	75 % RH	Z. m. y	female	24	10	0.5582	0.0343072	Left	Forewing	ups	dry	168.965	1.481	5.66855	0.00584432	NA	NA	NA	NA	154	0.0764481	small	dry	0.0611207	0.247226
744	24	moore	25-08-07	Ghana	3	moore_8.2	Temp_2	25 C	75 % RH	Z. m. y	female	25	10	0.6238	0.0341776	Right	Forewing	uns	dry	182.928	1.3297	5.9707	0.0055871	NA	NA	NA	NA	154	0.0747469	small	dry	0.051763	0.227515
745	25	moore	25-08-08	Ghana	3	moore_8.2	Temp_2	25 C	75 % RH	Z. m. y	female	25	9	0.5574	0.0329192	Right	Forewing	uns	dry	156.461	1.5451	5.8633	0.0069445	NA	NA	NA	NA	154	0.0833336	small	dry	0.0571446	0.239049
746	26	moore	25-08-09	Ghana	3	moore_8.2	Temp_2	25 C	75 % RH	Z. m. y	male	25	10	0.6078	0.0338829	Left	Forewing	ups	dry	174.667	1.41395	5.78295	0.00447853	NA	NA	NA	NA	154	0.0669219	small	dry	0.0513402	0.226584
747	15	moore	25-08-10	Ghana	3	moore_8.2	Temp_2	25 C	75 % RH	Z. m. y	female	27	10	0.509	0.0295716	Right	Forewing	uns	dry	145.959	1.45375	5.5833	0.00478426	NA	NA	NA	NA	154	0.0691683	small	dry	0.0502473	0.224159
748	1008	moore	25-09-01	Ghana	3	moore_9.2	Temp_2	25 C	75 % RH	Z. m. y	female	22	10	0.5106	0.0363305	Left	Forewing	ups	dry	162.142	1.47195	5.8762	0.00760777	NA	NA	NA	NA	154	0.0872225	small	dry	0.0492199	0.221856
749	1022	moore	25-09-02	Ghana	3	moore_9.2	Temp_2	25 C	75 % RH	Z. m. y	female	22	10	0.5973	0.0382803	Left	Forewing	ups	dry	159.573	1.4555	5.64185	0.00862112	NA	NA	NA	NA	154	0.09285	small	dry	0.0464337	0.215485
750	37	moore	25-09-03	Ghana	3	moore_9.2	Temp_2	25 C	75 % RH	Z. m. y	male	23	10	0.5756	0.036167	Right	Forewing	uns	dry	158.985	0.98275	3.28805	0.00591692	NA	NA	NA	NA	154	0.0769215	small	dry	0.033842	0.183962
751	31	moore	25-09-04	Ghana	3	moore_9.2	Temp_2	25 C	75 % RH	Z. m. y	male	24	10	0.4446	0.0318013	Left	Forewing	ups	dry	136.476	0.6121	2.3573	0.0074746	NA	NA	NA	NA	154	0.0864558	small	dry	0.0248382	0.157601
752	32	moore	25-09-05	Ghana	3	moore_9.2	Temp_2	25 C	75 % RH	Z. m. y	male	24	10	0.4482	0.0318869	Left	Forewing	ups	dry	139.538	0.83485	3.0409	0.00981691	NA	NA	NA	NA	154	0.0990803	small	dry	0.0302794	0.17401
753	27	moore	25-09-07	Ghana	3	moore_9.2	Temp_2	25 C	75 % RH	Z. m. y	male	25	9	0.4862	0.0314532	Right	Forewing	uns	dry	137.141	0.88015	3.15165	0.00784432	NA	NA	NA	NA	154	0.0885681	small	dry	0.0296396	0.172161
754	983	moore	25-09-08	Ghana	3	moore_9.2	Temp_2	25 C	75 % RH	Z. m. y	female	25	10	0.4984	0.0317141	Right	Forewing	uns	dry	156.482	0.8666	3.81625	0.00523067	NA	NA	NA	NA	154	0.0723234	small	dry	0.0367608	0.191731
755	1018	moore	25-10-01	Ghana	3	Temp_10.2	Temp_2	25 C	75 % RH	Z. m. y	female	23	10	0.5638	0.0359181	Right	Forewing	uns	dry	174.867	1.30025	5.0889	0.00703345	NA	NA	NA	NA	155	0.0838656	small	dry	0.0485664	0.220378
756	34	moore	25-10-02	Ghana	3	Temp_10.2	Temp_2	25 C	75 % RH	Z. m. y	male	24	10	0.5368	0.0338631	Left	Forewing	ups	dry	156.888	0.7529	3.06575	0.00443467	NA	NA	NA	NA	155	0.0665933	small	dry	0.0291587	0.170759
757	562	moore	25-13-01	Ghana	2	Temp_13.1	Temp_1	25 C	75 % RH	Z. m. y	female	22	9	0.5792	0.0378896	Right	Forewing	uns	int	154.434	0.95265	3.65215	0.0155587	NA	NA	NA	NA	104	0.124734	small	dry	0.0372972	0.193125
758	884	moore	25-13-02	Ghana	2	Temp_13.1	Temp_1	25 C	75 % RH	Z. m. y	male	22	9	0.5793	0.0378918	Right	Forewing	uns	dry	147.957	0.9118	3.0687	0.00275269	NA	NA	NA	NA	104	0.0524661	small	dry	0.0340961	0.184651
759	661	moore	25-13-03	Ghana	2	Temp_13.1	Temp_1	25 C	75 % RH	Z. m. y	male	23	10	0.5109	0.0347577	Left	Forewing	ups	dry	130.377	0.93995	3.4237	0.00879642	NA	NA	NA	NA	104	0.0937892	small	dry	0.038613	0.196502
760	617	moore	25-13-04	Ghana	2	Temp_13.1	Temp_1	25 C	75 % RH	Z. m. y	female	23	8	0.5656	0.0359563	Right	Forewing	uns	int	138.374	0.9016	3.24455	0.00905097	NA	NA	NA	NA	104	0.0951366	small	dry	0.0333736	0.182684
761	720	moore	25-13-05	Ghana	2	Temp_13.1	Temp_1	25 C	75 % RH	Z. m. y	female	23	9	0.5657	0.0359584	Right	Forewing	uns	dry	149.808	1.49735	5.5589	0.00734903	NA	NA	NA	NA	104	0.0857265	small	dry	0.0598197	0.244581
762	734	moore	25-13-07	Ghana	2	Temp_13.1	Temp_1	25 C	75 % RH	Z. m. y	male	NA	NA	0.5931	NA	Left	Forewing	ups	dry	158.492	0.7715	2.42985	0.00460766	NA	NA	NA	NA	104	0.0678798	small	dry	0.0244086	0.156233
763	613	moore	25-13-08	Ghana	2	Temp_13.1	Temp_1	25 C	75 % RH	Z. m. y	female	NA	NA	0.5745	NA	Left	Forewing	ups	int	152.787	1.20155	3.9684	0.00951451	NA	NA	NA	NA	104	0.0975423	small	dry	0.0407002	0.201743
764	819	moore	25-13-09	Ghana	2	Temp_13.1	Temp_1	25 C	75 % RH	Z. m. y	male	NA	NA	0.5236	NA	Right	Forewing	uns	dry	139.312	1.10145	3.78195	0.0044851	NA	NA	NA	NA	104	0.0669709	small	dry	0.03002	0.173263
765	700	moore	25-13-11	Ghana	2	Temp_13.1	Temp_1	25 C	75 % RH	Z. m. y	male	NA	NA	0.4936	NA	Left	Forewing	ups	dry	116.475	0.77105	2.77755	0.00730739	NA	NA	NA	NA	104	0.0854833	small	dry	0.0237252	0.15403
766	746	moore	25-13-11(2)	Ghana	2	Temp_13.1	Temp_1	25 C	75 % RH	Z. m. y	male	NA	NA	NA	NA	Right	Forewing	uns	dry	128.525	0.7535	2.74815	0.00491909	NA	NA	NA	NA	104	0.0701363	small	dry	0.0280968	0.167621
767	915	moore	25-14-02	Ghana	2	Temp_14.1	Temp_1	25 C	75 % RH	Z. m. y	male	25	10	0.5085	0.0319269	Left	Forewing	ups	dry	145.219	0.8678	2.76945	0.00318767	NA	NA	NA	NA	103	0.0564595	small	dry	0.0279428	0.167161
768	714	moore	25-14-03	Ghana	2	Temp_14.1	Temp_1	25 C	75 % RH	Z. m. y	male	25	10	0.5184	0.0321328	Left	Forewing	ups	dry	138.668	0.9122	3.47565	0.00659981	NA	NA	NA	NA	103	0.0812392	small	dry	0.02784	0.166853
769	652	moore	25-14-04	Ghana	2	Temp_14.1	Temp_1	25 C	75 % RH	Z. m. y	male	26	10	0.4829	0.0301749	Right	Forewing	uns	dry	125.625	1.0512	3.50005	0.00798476	NA	NA	NA	NA	103	0.0893575	small	dry	0.0297653	0.172526
770	682	moore	25-14-05	Ghana	2	Temp_14.1	Temp_1	25 C	75 % RH	Z. m. y	male	26	10	0.3953	0.0282273	Left	Forewing	ups	dry	110.083	0.94175	3.14725	0.00890711	NA	NA	NA	NA	103	0.0943775	small	dry	0.0272832	0.165176
771	909	moore	25-14-08	Ghana	2	Temp_14.1	Temp_1	25 C	75 % RH	Z. m. y	male	28	10	0.4061	0.0264476	Left	Forewing	ups	dry	112.222	1.10935	3.96215	0.0040588	NA	NA	NA	NA	103	0.0637087	small	dry	0.0391785	0.197936
772	731	moore	25-14-09	Ghana	2	Temp_14.1	Temp_1	25 C	75 % RH	Z. m. y	male	NA	NA	NA	NA	Left	Forewing	ups	dry	117.273	0.82195	2.82175	0.00662936	NA	NA	NA	NA	103	0.0814209	small	dry	0.0275075	0.165854
773	726	moore	25-14-10	Ghana	2	Temp_14.1	Temp_1	25 C	75 % RH	Z. m. y	female	NA	NA	NA	NA	Right	Forewing	uns	dry	127.304	0.86225	3.39765	0.00535942	NA	NA	NA	NA	103	0.0732081	small	dry	0.0342791	0.185146
774	831	moore	25-14-13	Ghana	2	Temp_14.1	Temp_1	25 C	75 % RH	Z. m. y	female	31	10	0.4867	0.0253742	Left	Forewing	ups	dry	145.846	1.18625	4.5786	0.00359279	NA	NA	NA	NA	103	0.0599399	small	dry	0.0456984	0.213772
775	601	moore	25-14-14	Ghana	2	Temp_14.1	Temp_1	25 C	75 % RH	Z. m. y	male	37	9	0.417	0.0201919	Left	Forewing	ups	int	111.806	0.73075	2.7749	0.0142741	NA	NA	NA	NA	103	0.119474	small	dry	0.0283142	0.168268
776	642	moore	25-15-01	Ghana	2	Temp_15.1	Temp_1	25 C	75 % RH	Z. m. y	female	21	9	0.5678	0.0394317	Right	Forewing	uns	int	151.569	1.088	4.2405	0.00473604	NA	NA	NA	NA	103	0.0688189	small	dry	0.041713	0.204238
777	145	moore	25-15-02	Ghana	2	Temp_15.1	Temp_1	25 C	75 % RH	Z. m. y	female	22	8	0.4466	0.0347443	Right	Forewing	uns	wet	121.314	0.56765	2.0464	0.0481239	NA	NA	NA	NA	103	0.219372	large	wet	0.0208339	0.144339
778	572	moore	25-15-03	Ghana	2	Temp_15.1	Temp_1	25 C	75 % RH	Z. m. y	female	22	9	0.4831	0.0356662	Right	Forewing	uns	int	131.383	0.8126	2.86885	0.0162041	NA	NA	NA	NA	103	0.127295	small	dry	0.0284011	0.168526
779	875	moore	25-15-04	Ghana	2	Temp_15.1	Temp_1	25 C	75 % RH	Z. m. y	female	24	9	0.5662	0.0344703	Left	Forewing	ups	dry	162.274	1.20565	4.58455	0.00390242	NA	NA	NA	NA	103	0.0624694	small	dry	0.0501869	0.224024
780	456	moore	25-15-05	Ghana	2	Temp_15.1	Temp_1	25 C	75 % RH	Z. m. y	male	24	7	0.4814	0.0326556	Right	Forewing	uns	wet	128.431	0.53595	1.6207	0.0253139	NA	NA	NA	NA	103	0.159103	large	wet	0.0177721	0.133312
781	723	moore	25-15-06	Ghana	2	Temp_15.1	Temp_1	25 C	75 % RH	Z. m. y	male	23	9	0.5262	0.0351012	Right	Forewing	uns	dry	142.126	1.04435	3.5005	0.00564955	NA	NA	NA	NA	103	0.0751635	small	dry	0.0404591	0.201144
782	785	moore	25-15-07	Ghana	2	Temp_15.1	Temp_1	25 C	75 % RH	Z. m. y	male	24	9	0.5104	0.0332986	Left	Forewing	ups	dry	136.689	0.9457	2.95915	0.00503664	NA	NA	NA	NA	103	0.0709693	small	dry	0.0276401	0.166253
783	733	moore	25-15-08.5	Ghana	2	Temp_15.1	Temp_1	25 C	75 % RH	Z. m. y	female	23	9	0.5105	0.0347486	Left	Forewing	ups	dry	157.088	1.39475	5.55315	0.0046839	NA	NA	NA	NA	103	0.068439	small	dry	0.0506389	0.225031
784	769	moore	25-15-09	Ghana	2	Temp_15.1	Temp_1	25 C	75 % RH	Z. m. y	female	NA	NA	NA	NA	Right	Forewing	uns	dry	160.903	1.31995	4.70415	0.00420174	NA	NA	NA	NA	103	0.0648208	small	dry	0.0490804	0.221541
785	744	moore	25-15-10	Ghana	2	Temp_15.1	Temp_1	25 C	75 % RH	Z. m. y	female	24	10	0.5812	0.0347721	Right	Forewing	uns	dry	163.142	1.26235	4.731	0.00431493	NA	NA	NA	NA	103	0.0656881	small	dry	0.0573487	0.239476
786	820	moore	25-15-11	Ghana	2	Temp_15.1	Temp_1	25 C	75 % RH	Z. m. y	male	24	10	0.6443	0.0359875	Right	Forewing	uns	dry	149.542	1.15005	3.87275	0.00440862	NA	NA	NA	NA	103	0.0663974	small	dry	0.0415008	0.203718
787	925	moore	25-15-12	Ghana	2	Temp_15.1	Temp_1	25 C	75 % RH	Z. m. y	male	24	10	0.5224	0.0335575	Left	Forewing	ups	dry	134.202	0.8164	2.8536	0.00360305	NA	NA	NA	NA	103	0.0600254	small	dry	0.0308849	0.175741
788	690	moore	25-15-13	Ghana	2	Temp_15.1	Temp_1	25 C	75 % RH	Z. m. y	female	NA	NA	0.5426	NA	Left	Forewing	ups	dry	158.266	1.38835	4.9869	0.00602971	NA	NA	NA	NA	103	0.0776512	small	dry	0.044887	0.211865
789	659	moore	25-15-14	Ghana	2	Temp_15.1	Temp_1	25 C	75 % RH	Z. m. y	male	27	8	0.5038	0.0294706	Right	Forewing	uns	dry	134.956	0.9053	3.44025	0.00692977	NA	NA	NA	NA	103	0.0832452	small	dry	0.0307318	0.175305
790	151	moore	25-24-01	Ghana	2	Temp_24.1	Temp_1	25 C	75 % RH	Z. m. y	female	22	8	0.3701	0.032635	Left	Forewing	ups	wet	119.518	0.097486	0.9669	0.0460769	NA	NA	NA	NA	105	0.214655	large	wet	0.00997782	0.099889
791	639	moore	25-24-02	Ghana	2	Temp_24.1	Temp_1	25 C	75 % RH	Z. m. y	male	NA	NA	0.4455	NA	Left	Forewing	ups	dry	124.91	0.5712	2.0226	0.00883696	NA	NA	NA	NA	105	0.0940051	small	dry	0.0218429	0.147794
792	663	moore	25-24-03	Ghana	2	Temp_24.1	Temp_1	25 C	75 % RH	Z. m. y	male	24	10	0.5554	0.0342497	Left	Forewing	ups	dry	152.478	0.687	2.2009	0.00664252	NA	NA	NA	NA	105	0.0815017	small	dry	0.0198399	0.140854
793	686	moore	25-24-05	Ghana	2	Temp_24.1	Temp_1	25 C	75 % RH	Z. m. y	male	24	10	0.3894	0.0304266	Left	Forewing	ups	dry	113.601	0.90365	2.8777	0.00667079	NA	NA	NA	NA	105	0.0816749	small	dry	0.0278177	0.166786
794	717	moore	25-24-06	Ghana	2	Temp_24.1	Temp_1	25 C	75 % RH	Z. m. y	male	24	10	0.4404	0.0317009	Left	Forewing	ups	dry	110.467	0.7739	3.0122	0.00726082	NA	NA	NA	NA	105	0.0852104	small	dry	0.029412	0.171499
795	727	moore	25-24-07	Ghana	2	Temp_24.1	Temp_1	25 C	75 % RH	Z. m. y	female	NA	NA	NA	NA	Right	Forewing	uns	dry	131.521	1.098	3.8864	0.00680477	NA	NA	NA	NA	105	0.082491	small	dry	0.0304778	0.174579
796	796	moore	25-24-08	Ghana	2	Temp_24.1	Temp_1	25 C	75 % RH	Z. m. y	male	NA	NA	NA	NA	Left	Forewing	ups	dry	142.715	0.8782	3.2454	0.00427456	NA	NA	NA	NA	105	0.0653801	small	dry	0.0258907	0.160906
797	635	moore	25-24-09	Ghana	2	Temp_24.1	Temp_1	25 C	75 % RH	Z. m. y	female	28	9	0.4122	0.0265794	Right	Forewing	uns	int	134.767	0.7621	2.92405	0.00793611	NA	NA	NA	NA	105	0.0890849	small	dry	0.0346141	0.186049
798	863	moore	25-24-10	Ghana	2	Temp_24.1	Temp_1	25 C	75 % RH	Z. m. y	male	28	10	0.3986	0.0262838	Left	Forewing	ups	dry	118.576	1.0178	3.4948	0.00366735	NA	NA	NA	NA	105	0.0605586	small	dry	0.0280349	0.167436
799	707	moore	25-24-11	Ghana	2	Temp_24.1	Temp_1	25 C	75 % RH	Z. m. y	male	28	10	0.3623	0.0254604	Left	Forewing	ups	dry	112.379	0.76195	2.85615	0.00792608	NA	NA	NA	NA	105	0.0890285	small	dry	0.0232456	0.152465
800	764	moore	25-24-13	Ghana	2	Temp_24.1	Temp_1	25 C	75 % RH	Z. m. y	female	30	10	0.3798	0.0241396	Right	Forewing	uns	int	121.758	0.89405	3.35775	0.0053914	NA	NA	NA	NA	105	0.0734261	small	dry	0.0293283	0.171255
801	580	moore	25-24-14	Ghana	2	Temp_24.1	Temp_1	25 C	75 % RH	Z. m. y	female	30	10	0.357	0.0236466	Left	Forewing	ups	int	112.966	1.00025	4.0575	0.0139516	NA	NA	NA	NA	105	0.118117	small	dry	0.0389356	0.197321
802	912	moore	25-24-15	Ghana	2	Temp_24.1	Temp_1	25 C	75 % RH	Z. m. y	female	32	10	0.348	0.0219808	Left	Forewing	ups	dry	106.966	0.95945	3.7667	0.00475592	NA	NA	NA	NA	105	0.0689631	small	dry	0.0355973	0.188673
803	515	moore	25-24-16	Ghana	2	Temp_24.1	Temp_1	25 C	75 % RH	Z. m. y	female	33	9	0.4676	0.0235204	Left	Forewing	ups	wet	152.161	1.06365	3.80815	0.0174073	NA	NA	NA	NA	105	0.131937	small	dry	0.0405078	0.201265
804	736	moore	25-24-17	Ghana	2	Temp_24.1	Temp_1	25 C	75 % RH	Z. m. y	male	34	9	0.5758	0.0244687	Left	Forewing	ups	dry	152.369	1.19635	4.986	0.00593778	NA	NA	NA	NA	105	0.077057	small	dry	0.056402	0.237491
805	657	moore	25-28-01	Ghana	2	Temp_28.1	Temp_1	25 C	75 % RH	Z. m. y	female	NA	NA	NA	NA	Left	Forewing	ups	dry	171.463	1.38875	5.16515	0.00612368	NA	NA	NA	NA	107	0.078254	small	dry	0.0582463	0.241343
806	745	moore	25-28-04	Ghana	2	Temp_28.1	Temp_1	25 C	75 % RH	Z. m. y	female	21	10	0.4054	0.0352432	Left	Forewing	ups	dry	132.39	0.91425	3.0136	0.00566572	NA	NA	NA	NA	107	0.075271	small	dry	0.032033	0.178978
807	772	moore	25-28-05	Ghana	2	Temp_28.1	Temp_1	25 C	75 % RH	Z. m. y	male	NA	NA	NA	NA	Right	Forewing	uns	dry	122.888	0.93365	3.10615	0.00502421	NA	NA	NA	NA	107	0.0708817	small	dry	0.0252054	0.158762
808	683	moore	25-28-06	Ghana	2	Temp_28.1	Temp_1	25 C	75 % RH	Z. m. y	male	NA	NA	NA	NA	Left	Forewing	ups	dry	148.644	0.9036	3.48725	0.00506993	NA	NA	NA	NA	107	0.0712034	small	dry	0.0289903	0.170265
809	685	moore	25-28-07	Ghana	2	Temp_28.1	Temp_1	25 C	75 % RH	Z. m. y	male	NA	NA	NA	NA	Right	Forewing	uns	dry	134.559	0.76275	2.7052	0.0059592	NA	NA	NA	NA	107	0.0771959	small	dry	0.0311315	0.176441
810	824	moore	25-28-08	Ghana	2	Temp_28.1	Temp_1	25 C	75 % RH	Z. m. y	male	NA	NA	NA	NA	Left	Forewing	ups	dry	143.706	0.9622	3.5164	0.00382359	NA	NA	NA	NA	107	0.0618352	small	dry	0.0318248	0.178395
811	623	moore	25-28-09	Ghana	2	Temp_28.1	Temp_1	25 C	75 % RH	Z. m. y	male	NA	NA	NA	NA	Right	Forewing	uns	dry	123.95	0.9608	3.65945	0.0110779	NA	NA	NA	NA	107	0.105251	small	dry	0.033065	0.181838
812	622	moore	25-28-10	Ghana	2	Temp_28.1	Temp_1	25 C	75 % RH	Z. m. y	female	NA	NA	NA	NA	Right	Forewing	uns	int	163.348	1.19005	4.669	0.00822714	NA	NA	NA	NA	107	0.0907036	small	dry	0.0401145	0.200286
813	187	moore	25-28-11	Ghana	2	Temp_28.1	Temp_1	25 C	75 % RH	Z. m. y	female	26	8	0.3985	0.0283032	Right	Forewing	uns	wet	125.376	0.6393	2.2752	0.0390585	NA	NA	NA	NA	107	0.197632	large	wet	0.0199728	0.141325
814	838	moore	25-28-12	Ghana	2	Temp_28.1	Temp_1	25 C	75 % RH	Z. m. y	male	26	10	0.5605	0.0317116	Left	Forewing	ups	dry	144.876	0.90405	2.79035	0.00334527	NA	NA	NA	NA	107	0.0578383	small	dry	0.0238823	0.154539
815	739	moore	25-28-14	Ghana	2	Temp_28.1	Temp_1	25 C	75 % RH	Z. m. y	female	34	10	0.5003	0.0233488	Left	Forewing	ups	dry	146.513	1.49895	5.4287	0.00548888	NA	NA	NA	NA	107	0.074087	small	dry	0.0484392	0.220089
816	738	moore	25-28-15	Ghana	2	Temp_28.1	Temp_1	25 C	75 % RH	Z. m. y	female	34	10	0.4396	0.0223635	Right	Forewing	uns	dry	137.698	1.15565	4.76095	0.0057479	NA	NA	NA	NA	107	0.0758149	small	dry	0.038056	0.195079
817	621	moore	25-37-01	Ghana	2	moore_37.1	Temp_1	25 C	75 % RH	Z. m. y	male	24	10	0.4609	0.0321853	Left	Forewing	ups	dry	131.747	0.6172	1.8659	0.00891474	NA	NA	NA	NA	109	0.0944179	small	dry	0.0152144	0.123347
818	829	moore	25-37-03	Ghana	2	moore_37.1	Temp_1	25 C	75 % RH	Z. m. y	male	25	10	0.5214	0.0321946	Right	Forewing	uns	dry	140.058	0.7525	2.4263	0.0036386	NA	NA	NA	NA	109	0.0603208	small	dry	0.0220745	0.148575
819	626	moore	25-37-04	Ghana	2	moore_37.1	Temp_1	25 C	75 % RH	Z. m. y	female	25	9	0.4858	0.0314446	Left	Forewing	ups	dry	140.493	0.93215	3.47485	0.00771297	NA	NA	NA	NA	109	0.0878235	small	dry	0.0336773	0.183514
820	879	moore	25-37-06	Ghana	2	moore_37.1	Temp_1	25 C	75 % RH	Z. m. y	female	27	9	0.5007	0.02941	Right	Forewing	uns	dry	157.758	1.1496	4.48295	0.00333603	NA	NA	NA	NA	109	0.0577584	small	dry	0.0442619	0.210385
821	715	moore	25-37-07	Ghana	2	moore_37.1	Temp_1	25 C	75 % RH	Z. m. y	male	27	10	0.4782	0.0289627	Left	Forewing	ups	dry	129.808	0.73485	2.533	0.00534268	NA	NA	NA	NA	109	0.0730936	small	dry	0.028566	0.169015
822	646	moore	25-37-08	Ghana	2	moore_37.1	Temp_1	25 C	75 % RH	Z. m. y	male	27	10	0.4821	0.0290412	Right	Forewing	uns	dry	123.089	0.8121	2.8271	0.00859544	NA	NA	NA	NA	109	0.0927116	small	dry	0.0285917	0.169091
823	528	moore	25-37-09	Ghana	2	moore_37.1	Temp_1	25 C	75 % RH	Z. m. y	female	28	9	0.526	0.0288295	Right	Forewing	uns	int	141.768	0.94065	3.3888	0.0205216	NA	NA	NA	NA	109	0.143254	small	dry	0.0358592	0.189365
824	816	moore	25-37-11	Ghana	2	moore_37.1	Temp_1	25 C	75 % RH	Z. m. y	male	29	10	0.5143	0.0276275	Left	Forewing	ups	dry	145.231	0.83735	2.8896	0.00473243	NA	NA	NA	NA	109	0.0687927	small	dry	0.0316792	0.177987
825	649	moore	25-37-12	Ghana	2	moore_37.1	Temp_1	25 C	75 % RH	Z. m. y	male	29	10	0.5348	0.0279898	Left	Forewing	ups	dry	140.157	0.8152	3.0362	0.00607574	NA	NA	NA	NA	109	0.0779471	small	dry	0.0330666	0.181842
826	867	moore	25-37-13	Ghana	2	moore_37.1	Temp_1	25 C	75 % RH	Z. m. y	male	31	9	0.3863	0.0234934	Right	Forewing	uns	dry	119.621	0.9477	3.2634	0.00419835	NA	NA	NA	NA	109	0.0647946	small	dry	0.0317978	0.178319
827	855	moore	25-37-14	Ghana	2	moore_37.1	Temp_1	25 C	75 % RH	Z. m. y	male	31	10	0.4607	0.0249141	Left	Forewing	ups	dry	136.473	0.9741	3.1802	0.00437732	NA	NA	NA	NA	109	0.0661613	small	dry	0.0307962	0.175488
828	650	moore	25-37-15	Ghana	2	moore_37.1	Temp_1	25 C	75 % RH	Z. m. y	female	36	9	0.3227	0.019053	Right	Forewing	uns	int	105.748	0.84825	3.34125	0.0120116	NA	NA	NA	NA	109	0.109598	small	dry	0.0299962	0.173194
829	839	moore	25-41-03	Ghana	2	moore_41.1	Temp_1	25 C	75 % RH	Z. m. y	male	NA	NA	NA	NA	Right	Forewing	uns	dry	132.976	0.8824	3.11325	0.00323405	NA	NA	NA	NA	111	0.0568687	small	dry	0.0244929	0.156502
830	813	moore	25-41-04	Ghana	2	moore_41.1	Temp_1	25 C	75 % RH	Z. m. y	male	26	10	0.5847	0.0321616	Right	Forewing	uns	dry	144.986	1.05485	3.59795	0.00497754	NA	NA	NA	NA	111	0.0705517	small	dry	0.0290393	0.170409
831	662	moore	25-41-06	Ghana	2	moore_41.1	Temp_1	25 C	75 % RH	Z. m. y	female	27	10	0.5501	0.0303471	Right	Forewing	uns	int	153.7	1.17255	4.8433	0.006796	NA	NA	NA	NA	111	0.0824378	small	dry	0.0491475	0.221692
832	763	moore	25-41-07	Ghana	2	moore_41.1	Temp_1	25 C	75 % RH	Z. m. y	male	27	10	0.5242	0.0298631	Left	Forewing	ups	dry	142.21	0.7127	2.40685	0.00508573	NA	NA	NA	NA	111	0.0713143	small	dry	0.025486	0.159643
833	651	moore	25-41-08	Ghana	2	moore_41.1	Temp_1	25 C	75 % RH	Z. m. y	female	28	9	0.4109	0.0265514	Right	Forewing	uns	int	130.353	1.0578	3.55005	0.00751239	NA	NA	NA	NA	111	0.0866741	small	dry	0.0313282	0.176998
834	678	moore	25-41-09	Ghana	2	moore_41.1	Temp_1	25 C	75 % RH	Z. m. y	female	29	10	0.4561	0.0265433	Right	Forewing	uns	int	143.536	1.20635	4.5397	0.00745704	NA	NA	NA	NA	111	0.0863542	small	dry	0.0424055	0.205926
835	2917	hallow	10_27_55	India	1	hallow_12	Temp_HR	27 C	55 % RH	Z. m. y	female	24	7	0.3342	0.0289151	Right	Forewing	uns	wet	104.34	NA	1.4263	0.0704351	NA	NA	NA	NA	NA	0.265396	large	wet	0.0119652	0.109386
836	2927	hallow	11_27_55	India	1	hallow_12	Temp_HR	27 C	55 % RH	Z. m. y	male	24	7	0.3492	0.0293414	Right	Forewing	uns	wet	105.873	NA	1.5228	0.0292094	NA	NA	NA	NA	NA	0.170908	large	wet	0.0129617	0.11385
837	2937	hallow	12_27_55	India	1	hallow_12	Temp_HR	27 C	55 % RH	Z. m. y	female	24	7	0.4839	0.032712	Right	Forewing	uns	NA	NA	NA	NA	NA	NA	NA	NA	NA	NA	NA	NA	NA	NA	NA
838	2947	hallow	13_27_55	India	1	hallow_21	Temp_HR	27 C	55 % RH	Z. m. y	female	21	7	0.3912	0.0348268	Right	Forewing	uns	wet	104.237	NA	1.6355	0.0575562	NA	NA	NA	NA	NA	0.239909	large	wet	0.015109	0.122919
839	2957	hallow	14_27_55	India	1	hallow_21	Temp_HR	27 C	55 % RH	Z. m. y	female	21	7	0.3343	0.0330491	Right	Forewing	uns	wet	115.839	NA	1.9511	0.0650283	NA	NA	NA	NA	NA	0.255006	large	wet	0.0176388	0.132811
840	2967	hallow	15_27_55	India	1	hallow_21	Temp_HR	27 C	55 % RH	Z. m. y	female	22	8	0.3745	0.0327638	Right	Forewing	uns	dry	137.098	NA	3.0493	0.0104604	NA	NA	NA	NA	NA	0.102276	small	dry	0.0293313	0.171264
841	2975	hallow	16_27_55	India	1	hallow_10	Temp_HR	27 C	55 % RH	Z. m. y	male	25	11	0.3633	0.0285418	Right	Forewing	uns	dry	120.071	NA	4.1195	0.0074198	NA	NA	NA	NA	NA	0.0861383	small	dry	0.0329275	0.181459
842	2985	hallow	17_27_55	India	1	hallow_10	Temp_HR	27 C	55 % RH	Z. m. y	female	25	7	0.3565	0.0283626	Right	Forewing	uns	dry	117.496	NA	2.677	0.0496339	NA	NA	NA	NA	NA	0.222787	large	wet	0.0227659	0.150884
843	2995	hallow	18_27_55	India	1	hallow_20	Temp_HR	27 C	55 % RH	Z. m. y	male	22	10	0.4143	0.0338856	Right	Forewing	uns	dry	130.365	NA	2.9981	0.0123867	NA	NA	NA	NA	NA	0.111296	small	dry	0.0251717	0.158656
844	3005	hallow	19_27_55	India	1	hallow_20	Temp_HR	27 C	55 % RH	Z. m. y	female	22	10	0.4366	0.034483	Right	Forewing	uns	wet	141.279	NA	2.1435	0.0400229	NA	NA	NA	NA	NA	0.200057	large	wet	0.0146496	0.121036
845	3015	hallow	2_27_55	India	1	hallow_12	Temp_HR	27 C	55 % RH	Z. m. y	male	17	8	0.2674	0.037897	Right	Forewing	NA	NA	NA	NA	NA	NA	NA	NA	NA	NA	NA	NA	NA	NA	NA	NA
846	3025	hallow	20_27_55	India	1	hallow_20	Temp_HR	27 C	55 % RH	Z. m. y	male	22	10	0.3464	0.031923	Right	Forewing	NA	dry	108.648	NA	1.4592	0.0133743	NA	NA	NA	NA	NA	0.115648	small	dry	0.00979586	0.098974
847	3035	hallow	21_27_55	India	1	hallow_20	Temp_HR	27 C	55 % RH	Z. m. y	female	22	NA	0.3316	0.0314617	Right	Forewing	NA	NA	NA	NA	NA	NA	NA	NA	NA	NA	NA	NA	NA	NA	NA	NA
848	3045	hallow	22_27_55	India	1	hallow_20	Temp_HR	27 C	55 % RH	Z. m. y	female	22	9	0.4049	0.0336274	Right	Forewing	NA	dry	132.524	NA	3.5706	0.00754202	NA	NA	NA	NA	NA	0.0868448	small	dry	0.0218565	0.14784
849	3055	hallow	23_27_55	India	1	hallow_20	Temp_HR	27 C	55 % RH	Z. m. y	female	22	9	0.3793	0.0329032	Right	Forewing	NA	wet	112.518	NA	1.6728	0.0365737	NA	NA	NA	NA	NA	0.191243	large	wet	0.00931721	0.0965257
850	3063	hallow	24_27_55	India	1	hallow_21	Temp_HR	27 C	55 % RH	Z. m. y	female	25	5	0.3433	0.0280082	Right	Forewing	NA	wet	131.049	NA	2.369	0.0717167	NA	NA	NA	NA	NA	0.2678	large	wet	0.0184705	0.135906
851	3071	hallow	25_27_55	India	1	hallow_21	Temp_HR	27 C	55 % RH	Z. m. y	female	25	10	0.4094	0.0297013	Right	Forewing	NA	dry	144.201	NA	2.5152	0.0226531	NA	NA	NA	NA	NA	0.150509	large	wet	0.0188952	0.13746
852	3079	hallow	26_27_55	India	1	hallow_21	Temp_HR	27 C	55 % RH	Z. m. y	male	25	12	0.4196	0.029946	Right	Forewing	NA	wet	111.349	NA	1.359	0.0495297	NA	NA	NA	NA	NA	0.222553	large	wet	0.0087566	0.0935767
853	3087	hallow	27_27_55	India	1	hallow_21	Temp_HR	27 C	55 % RH	Z. m. y	male	27	NA	0.3106	0.0250825	Right	Forewing	NA	dry	NA	NA	NA	NA	NA	NA	NA	NA	NA	NA	NA	dry	NA	NA
854	3095	hallow	28_27_55	India	1	hallow_21	Temp_HR	27 C	55 % RH	Z. m. y	female	27	7	0.4681	0.0287574	Right	Forewing	NA	wet	150.682	NA	4.0058	0.025084	NA	NA	NA	NA	NA	0.158379	large	wet	0.0307524	0.175363
855	3101	hallow	29_27_55	India	1	hallow_20	Temp_HR	27 C	55 % RH	Z. m. y	male	24	7	0.3675	0.0298452	Right	Forewing	NA	dry	125.446	NA	2.3652	0.00621143	NA	NA	NA	NA	NA	0.0788126	small	dry	0.0163344	0.127806
856	3109	hallow	3_27_55	India	1	hallow_12	Temp_HR	27 C	55 % RH	Z. m. y	female	17	8	0.3959	0.043193	Right	Forewing	NA	wet	NA	NA	NA	NA	NA	NA	NA	NA	NA	NA	NA	wet	NA	NA
857	3117	hallow	30_27_55	India	1	hallow_20	Temp_HR	27 C	55 % RH	Z. m. y	female	24	10	0.419	0.0311789	Right	Forewing	NA	dry	147.739	NA	3.4361	0.00940643	NA	NA	NA	NA	NA	0.0969868	small	dry	0.0225124	0.150041
858	3123	hallow	31_27_55	India	1	hallow_20	Temp_HR	27 C	55 % RH	Z. m. y	male	24	7	0.3164	0.0283923	Right	Forewing	NA	wet	NA	NA	NA	NA	NA	NA	NA	NA	NA	NA	NA	wet	NA	NA
859	3129	hallow	32_27_55	India	1	hallow_20	Temp_HR	27 C	55 % RH	Z. m. y	male	24	NA	0.3834	0.0302696	Right	Forewing	NA	NA	NA	NA	NA	NA	NA	NA	NA	NA	NA	NA	NA	NA	NA	NA
860	3135	hallow	33_27_55	India	1	hallow_20	Temp_HR	27 C	55 % RH	Z. m. y	female	24	NA	0.3122	0.0282661	Right	Forewing	NA	NA	NA	NA	NA	NA	NA	NA	NA	NA	NA	NA	NA	NA	NA	NA
861	3141	hallow	34_27_55	India	1	hallow_20	Temp_HR	27 C	55 % RH	Z. m. y	female	24	NA	0.3069	0.0281053	Right	Forewing	NA	NA	NA	NA	NA	NA	NA	NA	NA	NA	NA	NA	NA	NA	NA	NA
862	3147	hallow	35_27_55	India	1	hallow_20	Temp_HR	27 C	55 % RH	Z. m. y	male	24	10	0.3721	0.0299692	Right	Forewing	NA	dry	134.893	NA	1.9316	0.0134365	NA	NA	NA	NA	NA	0.115916	small	dry	0.0134313	0.115893
863	3171	hallow	4_27_55	India	1	hallow_10	Temp_HR	27 C	55 % RH	Z. m. y	male	18	NA	0.5013	0.0441327	Right	Forewing	NA	NA	NA	NA	NA	NA	NA	NA	NA	NA	NA	NA	NA	NA	NA	NA
864	3199	hallow	5_27_55	India	1	hallow_12	Temp_HR	27 C	55 % RH	Z. m. y	male	23	NA	0.322	0.0298005	Right	Forewing	NA	NA	NA	NA	NA	NA	NA	NA	NA	NA	NA	NA	NA	NA	NA	NA
865	3229	hallow	6_27_55	India	1	hallow_16	Temp_HR	27 C	55 % RH	Z. m. y	female	23	8	0.3961	0.0319306	Right	Forewing	NA	wet	113.426	NA	2.8023	0.043007	NA	NA	NA	NA	NA	0.207381	large	wet	0.0193061	0.138946
866	3245	hallow	7_27_55	India	1	hallow_16	Temp_HR	27 C	55 % RH	Z. m. y	female	23	13	0.4649	0.0336815	Right	Forewing	NA	wet	NA	NA	NA	NA	NA	NA	NA	NA	NA	NA	NA	wet	NA	NA
867	3253	hallow	8_27_55	India	1	hallow_10	Temp_HR	27 C	55 % RH	Z. m. y	male	25	7	0.3275	0.0275717	Right	Forewing	NA	dry	104.687	NA	1.9337	0.054299	NA	NA	NA	NA	NA	0.233021	large	wet	0.0125002	0.111804
868	3263	hallow	9_27_55	India	1	hallow_10	Temp_HR	27 C	55 % RH	Z. m. y	female	25	9	0.4132	0.0297929	Right	Forewing	NA	dry	122.368	NA	3.1136	0.00523828	NA	NA	NA	NA	NA	0.0723759	small	dry	0.0234075	0.152995
869	325	moore	28-10-03	Ghana	2	Temp_10.1	Temp_1	28 C	75 % RH	Z. m. y	male	NA	NA	NA	NA	Left	Forewing	ups	wet	106.819	0.20205	0.2033	0.0351234	NA	NA	NA	NA	102	0.187412	large	wet	0.0014931	0.0386406
870	129	moore	28-10-04	Ghana	2	Temp_10.1	Temp_1	28 C	75 % RH	Z. m. y	female	NA	NA	NA	NA	Right	Forewing	uns	wet	136.62	0.494	1.53975	0.0511543	NA	NA	NA	NA	102	0.226173	large	wet	0.010455	0.10225
871	144	moore	28-10-05	Ghana	2	Temp_10.1	Temp_1	28 C	75 % RH	Z. m. y	female	NA	NA	NA	NA	Left	Forewing	ups	wet	129.576	0.391	1.2959	0.0488196	NA	NA	NA	NA	102	0.220952	large	wet	0.00852161	0.0923126
872	507	moore	28-10-06	Ghana	2	Temp_10.1	Temp_1	28 C	75 % RH	Z. m. y	male	NA	NA	NA	NA	Left	Forewing	ups	wet	111.968	0.18865	0.148665	0.0220729	NA	NA	NA	NA	102	0.14857	small	dry	0.00105718	0.0325143
873	266	moore	28-10-07	Ghana	2	Temp_10.1	Temp_1	28 C	75 % RH	Z. m. y	female	NA	NA	NA	NA	Left	Forewing	ups	wet	126.25	0.20305	0.718	0.0363507	NA	NA	NA	NA	102	0.190659	large	wet	0.00514769	0.0717474
874	242	moore	28-10-10	Ghana	2	Temp_10.1	Temp_1	28 C	75 % RH	Z. m. y	female	NA	NA	NA	NA	Right	Forewing	uns	wet	137.732	0.6611	2.45465	0.0294102	NA	NA	NA	NA	102	0.171494	large	wet	0.0162809	0.127597
875	404	moore	28-10-13	Ghana	2	Temp_10.1	Temp_1	28 C	75 % RH	Z. m. y	female	22	NA	0.3563	0.0322242	Right	Forewing	uns	wet	90.9044	0.56475	1.8509	0.028461	NA	NA	NA	NA	102	0.168704	large	wet	0.0119117	0.109141
876	590	moore	28-11-02	Ghana	3	Temp_11.2	Temp_2	28 C	75 % RH	Z. m. y	female	17	5	0.506	0.0468743	Left	Forewing	ups	wet	136.422	0.5977	1.88985	0.0403717	NA	NA	NA	NA	156	0.200927	large	wet	0.012823	0.113239
877	200	moore	28-11-03	Ghana	2	Temp_11.1	Temp_1	28 C	75 % RH	Z. m. y	female	NA	NA	NA	NA	Left	Forewing	ups	wet	140.143	0.54895	1.64815	0.0343132	NA	NA	NA	NA	102	0.185238	large	wet	0.0108163	0.104001
878	408	moore	28-11-04	Ghana	2	Temp_11.1	Temp_1	28 C	75 % RH	Z. m. y	female	NA	NA	NA	NA	Left	Forewing	ups	wet	132.476	0.6824	2.2362	0.028489	NA	NA	NA	NA	102	0.168787	large	wet	0.0201468	0.14194
879	263	moore	28-11-08	Ghana	2	Temp_11.1	Temp_1	28 C	75 % RH	Z. m. y	female	16	5	0.4442	0.0476877	Right	Forewing	uns	wet	121.345	0.3459	1.42595	0.0307763	NA	NA	NA	NA	102	0.175432	large	wet	0.0110878	0.105298
880	460	moore	28-11-09	Ghana	2	Temp_11.1	Temp_1	28 C	75 % RH	Z. m. y	male	16	6	0.4329	0.0472798	Left	Forewing	ups	wet	94.4741	0.18085	0.40475	0.0285988	NA	NA	NA	NA	102	0.169112	large	wet	0.00282068	0.0531101
881	462	moore	28-11-10	Ghana	2	Temp_11.1	Temp_1	28 C	75 % RH	Z. m. y	female	16	6	0.4723	0.0486728	Left	Forewing	ups	wet	118.565	0.53015	1.4713	0.0268821	NA	NA	NA	NA	102	0.163958	large	wet	0.0102431	0.101208
882	174	moore	28-11-11	Ghana	2	Temp_11.1	Temp_1	28 C	75 % RH	Z. m. y	female	16	6	0.4105	0.0464499	Left	Forewing	ups	wet	116.396	0.37605	1.0452	0.0450643	NA	NA	NA	NA	102	0.212284	large	wet	0.00797237	0.0892881
883	156	moore	28-11-12	Ghana	2	Temp_11.1	Temp_1	28 C	75 % RH	Z. m. y	female	17	8	0.4642	0.0455463	Right	Forewing	uns	wet	128.702	0.5273	1.7846	0.045179	NA	NA	NA	NA	102	0.212553	large	wet	0.0130455	0.114217
884	53	moore	28-12-01	Ghana	3	Temp_12.2	Temp_2	28 C	75 % RH	Z. m. y	male	15	6	0.4341	0.0504784	Right	Forewing	uns	wet	112.334	0.298	0.67565	0.0400744	NA	NA	NA	NA	156	0.200186	large	wet	0.00494433	0.0703159
885	608	moore	28-12-03	Ghana	3	Temp_12.2	Temp_2	28 C	75 % RH	Z. m. y	female	16	6	0.3994	0.0460274	Left	Forewing	ups	wet	118.89	0.44495	1.3406	0.0586244	NA	NA	NA	NA	156	0.242125	large	wet	0.00901236	0.0949335
886	578	moore	28-12-05	Ghana	3	Temp_12.2	Temp_2	28 C	75 % RH	Z. m. y	female	17	6	0.4623	0.045484	Left	Forewing	ups	wet	133.641	0.53805	1.8765	0.0476506	NA	NA	NA	NA	156	0.21829	large	wet	0.0118693	0.108946
887	611	moore	28-12-06	Ghana	3	Temp_12.2	Temp_2	28 C	75 % RH	Z. m. y	female	18	6	0.5184	0.0446289	Right	Forewing	uns	wet	154.11	0.58765	2.0171	0.0510043	NA	NA	NA	NA	156	0.225841	large	wet	0.0118261	0.108748
888	859	moore	28-12-08	Ghana	3	Temp_12.2	Temp_2	28 C	75 % RH	Z. m. y	female	19	6	0.404	0.0389081	Left	Forewing	ups	wet	117.493	0.4837	1.8091	0.0881037	NA	NA	NA	NA	156	0.296823	large	wet	0.011726	0.108287
889	55	moore	28-13-01	Ghana	3	Temp_13.2	Temp_2	28 C	75 % RH	Z. m. y	male	15	6	0.4871	0.0524543	Right	Forewing	uns	wet	109.312	0.20865	0.41435	0.0536104	NA	NA	NA	NA	156	0.231539	large	wet	0.00259918	0.0509821
890	56	moore	28-13-02	Ghana	3	Temp_13.2	Temp_2	28 C	75 % RH	Z. m. y	male	15	6	0.426	0.0501624	Left	Forewing	ups	wet	95.2897	0.144755	0.3676	0.05015	NA	NA	NA	NA	156	0.223942	large	wet	0.00246845	0.0496835
891	878	moore	28-13-06	Ghana	3	Temp_13.2	Temp_2	28 C	75 % RH	Z. m. y	male	17	6	0.3841	0.0427595	Left	Forewing	ups	wet	82.4993	0.23075	0.6905	0.0546217	NA	NA	NA	NA	156	0.233713	large	wet	0.00420701	0.0648615
892	999	moore	28-14-01	Ghana	3	Temp_14.2	Temp_2	28 C	75 % RH	Z. m. y	male	16	5	0.4665	0.0484727	Right	Forewing	uns	wet	109.893	0.2138	0.28525	0.0388479	NA	NA	NA	NA	158	0.197099	large	wet	0.00201751	0.0449166
893	94	moore	28-14-03	Ghana	3	Temp_14.2	Temp_2	28 C	75 % RH	Z. m. y	male	17	6	0.3902	0.0429847	Left	Forewing	ups	wet	95.9041	0.12915	0.29645	0.0513035	NA	NA	NA	NA	158	0.226503	large	wet	0.0019881	0.0445881
894	50	moore	28-14-04	Ghana	3	Temp_14.2	Temp_2	28 C	75 % RH	Z. m. y	male	17	7	0.3954	0.0431748	Right	Forewing	uns	wet	97.7875	0.29175	0.84505	0.0469949	NA	NA	NA	NA	158	0.216783	large	wet	0.00513895	0.0716865
895	92	moore	28-14-05	Ghana	3	Temp_14.2	Temp_2	28 C	75 % RH	Z. m. y	male	18	6	0.3943	0.0407383	Left	Forewing	ups	wet	99.2536	0.2979	0.8194	0.0478065	NA	NA	NA	NA	158	0.218647	large	wet	0.00485165	0.0696538
896	46	moore	28-14-07	Ghana	3	Temp_14.2	Temp_2	28 C	75 % RH	Z. m. y	male	19	6	0.4184	0.039365	Left	Forewing	ups	wet	106.48	0.31465	0.65155	0.0383207	NA	NA	NA	NA	158	0.195757	large	wet	0.00450576	0.067125
897	730	moore	28-14-08	Ghana	3	Temp_14.2	Temp_2	28 C	75 % RH	Z. m. y	male	19	6	0.3715	0.0378355	Right	Forewing	uns	wet	100.148	0.3762	1.0939	0.0381207	NA	NA	NA	NA	158	0.195245	large	wet	0.00695204	0.0833789
898	519	moore	28-14-10	Ghana	3	Temp_14.2	Temp_2	28 C	75 % RH	Z. m. y	female	21	7	0.4826	0.0373517	Right	Forewing	uns	wet	149.017	0.5975	1.7623	0.0286676	NA	NA	NA	NA	158	0.169315	large	wet	0.0103185	0.10158
899	827	moore	28-14-12	Ghana	3	Temp_14.2	Temp_2	28 C	75 % RH	Z. m. y	female	24	6	0.2522	0.0263251	Left	Forewing	ups	wet	86.0774	0.4464	1.6828	0.0215998	NA	NA	NA	NA	158	0.146969	small	dry	0.00964833	0.0982259
900	880	moore	28-14-13	Ghana	3	Temp_14.2	Temp_2	28 C	75 % RH	Z. m. y	female	27	6	0.6031	0.031292	Right	Forewing	uns	wet	147.353	0.6136	2.4517	0.0480677	NA	NA	NA	NA	158	0.219243	large	wet	0.017814	0.133469
901	51	moore	28-15-03	Ghana	3	Temp_15.2	Temp_2	28 C	75 % RH	Z. m. y	male	17	6	0.4159	0.0439084	Right	Forewing	uns	wet	107.763	0.2698	0.90775	0.0381347	NA	NA	NA	NA	160	0.195281	large	wet	0.00575125	0.075837
902	48	moore	28-15-05	Ghana	3	Temp_15.2	Temp_2	28 C	75 % RH	Z. m. y	male	18	6	0.3408	0.0388056	Right	Forewing	uns	wet	102.171	0.25755	0.75905	0.038464	NA	NA	NA	NA	160	0.196122	large	wet	0.00504453	0.0710249
903	47	moore	28-15-06	Ghana	3	Temp_15.2	Temp_2	28 C	75 % RH	Z. m. y	female	18	6	0.447	0.0424779	Right	Forewing	uns	wet	134.602	0.61175	2.1324	0.0503529	NA	NA	NA	NA	160	0.224394	large	wet	0.0124616	0.111632
904	91	moore	28-15-08	Ghana	3	Temp_15.2	Temp_2	28 C	75 % RH	Z. m. y	male	19	5	0.3576	0.0373576	Left	Forewing	ups	wet	101.413	0.3025	0.7052	0.0499618	NA	NA	NA	NA	160	0.223521	large	wet	0.0057057	0.0755361
905	669	moore	28-16-01	Ghana	3	Temp_16.2	Temp_2	28 C	75 % RH	Z. m. y	male	15	6	0.4739	0.0519762	Left	Forewing	ups	wet	119.723	0.26465	0.8118	0.0314788	NA	NA	NA	NA	161	0.177423	large	wet	0.00637175	0.0798233
906	289	moore	28-16-01a	Ghana	2	Temp_16.1	Temp_1	28 C	75 % RH	Z. m. y	male	14	6	0.3112	0.0484044	Right	Forewing	uns	wet	87.2538	0.074855	0.12191	0.0476569	NA	NA	NA	NA	105	0.218305	large	wet	0.000686917	0.0262091
907	493	moore	28-16-02	Ghana	2	Temp_16.1	Temp_1	28 C	75 % RH	Z. m. y	male	15	5	0.4074	0.0494215	Left	Forewing	ups	wet	92.01	0.049115	0.19905	0.0341967	NA	NA	NA	NA	105	0.184923	large	wet	0.00108401	0.0329244
908	52	moore	28-16-03	Ghana	3	Temp_16.2	Temp_2	28 C	75 % RH	Z. m. y	male	16	6	0.4119	0.0465026	Right	Forewing	uns	wet	103.706	0.28875	0.6907	0.0531601	NA	NA	NA	NA	161	0.230565	large	wet	0.0043492	0.0659485
909	155	moore	28-16-03a	Ghana	2	Temp_16.1	Temp_1	28 C	75 % RH	Z. m. y	male	16	5	0.4397	0.0475261	Left	Forewing	ups	wet	110.791	0.150375	0.308485	0.0524235	NA	NA	NA	NA	105	0.228962	large	wet	0.00173532	0.0416572
910	273	moore	28-16-04	Ghana	2	Temp_16.1	Temp_1	28 C	75 % RH	Z. m. y	male	16	6	0.3337	0.043351	Right	Forewing	uns	wet	76.1719	0.1739	0.2828	0.0636862	NA	NA	NA	NA	105	0.252361	large	wet	0.00194232	0.0440717
911	117	moore	28-16-07	Ghana	2	Temp_16.1	Temp_1	28 C	75 % RH	Z. m. y	female	17	6	0.4308	0.0444266	Left	Forewing	ups	wet	126.901	0.48765	1.27755	0.0676256	NA	NA	NA	NA	105	0.260049	large	wet	0.00793099	0.0890561
912	312	moore	28-16-08	Ghana	2	Temp_16.1	Temp_1	28 C	75 % RH	Z. m. y	male	17	6	0.3532	0.0415807	Left	Forewing	ups	wet	85.0413	0.19845	0.6829	0.0486949	NA	NA	NA	NA	105	0.220669	large	wet	0.00496044	0.0704304
913	574	moore	28-16-11	Ghana	3	Temp_16.2	Temp_2	28 C	75 % RH	Z. m. y	female	23	7	0.3731	0.0313002	Right	Forewing	uns	wet	128.493	0.542	2.00415	0.0342674	NA	NA	NA	NA	160	0.185115	large	wet	0.0129945	0.113993
914	517	moore	28-17-01	Ghana	2	Temp_17.1	Temp_1	28 C	75 % RH	Z. m. y	male	16	NA	0.4187	0.0467571	Right	Forewing	uns	wet	88.6792	0.08486	0.09562	0.0341251	NA	NA	NA	NA	104	0.18473	large	wet	0.000633297	0.0251654
915	310	moore	28-17-04	Ghana	2	Temp_17.1	Temp_1	28 C	75 % RH	Z. m. y	female	17	6	0.3168	0.0401002	Left	Forewing	ups	wet	94.7566	0.2554	0.8953	0.0415677	NA	NA	NA	NA	104	0.203881	large	wet	0.00507377	0.0712304
916	298	moore	28-17-05	Ghana	2	Temp_17.1	Temp_1	28 C	75 % RH	Z. m. y	male	17	NA	0.3403	0.0410681	Left	Forewing	ups	wet	81.6161	0.10745	0.5788	0.0482331	NA	NA	NA	NA	104	0.21962	large	wet	0.00420949	0.0648806
917	571	moore	28-17-07	Ghana	2	Temp_17.1	Temp_1	28 C	75 % RH	Z. m. y	male	18	6	0.3907	0.040614	Left	Forewing	ups	wet	90.4163	0.07843	0.2684	0.0248093	NA	NA	NA	NA	104	0.15751	large	wet	0.00170344	0.0412728
918	295	moore	28-17-09	Ghana	2	Temp_17.1	Temp_1	28 C	75 % RH	Z. m. y	female	20	NA	0.4184	0.0373968	Right	Forewing	uns	wet	117.293	0.5235	1.9308	0.0333042	NA	NA	NA	NA	104	0.182494	large	wet	0.0118453	0.108836
919	179	moore	28-20-01	Ghana	2	Temp_20.1	Temp_1	28 C	75 % RH	Z. m. y	male	16	6	0.4543	0.0480464	Right	Forewing	uns	wet	114.566	0.2745	0.5969	0.0499756	NA	NA	NA	NA	106	0.223552	large	wet	0.0034877	0.0590568
920	202	moore	28-20-02	Ghana	2	Temp_20.1	Temp_1	28 C	75 % RH	Z. m. y	male	16	6	0.3728	0.044982	Right	Forewing	uns	wet	89.5757	0.17895	0.42675	0.0518961	NA	NA	NA	NA	106	0.227807	large	wet	0.00286773	0.0535512
921	243	moore	28-20-06	Ghana	2	Temp_20.1	Temp_1	28 C	75 % RH	Z. m. y	female	19	8	0.4665	0.0408191	Left	Forewing	ups	wet	125.632	0.4447	1.5465	0.0378025	NA	NA	NA	NA	106	0.194429	large	wet	0.0157891	0.125655
922	184	moore	28-23-01	Ghana	2	Temp_23.1	Temp_1	28 C	75 % RH	Z. m. y	male	16	6	0.3915	0.0457219	Left	Forewing	ups	wet	99.4885	0.23055	0.61305	0.0529404	NA	NA	NA	NA	105	0.230088	large	wet	0.00596665	0.0772441
923	337	moore	28-23-02	Ghana	2	Temp_23.1	Temp_1	28 C	75 % RH	Z. m. y	male	16	5	0.4178	0.0467236	Right	Forewing	uns	wet	106.701	0.25705	0.5667	0.0370621	NA	NA	NA	NA	105	0.192515	large	wet	0.00386847	0.062197
924	180	moore	28-23-03	Ghana	2	Temp_23.1	Temp_1	28 C	75 % RH	Z. m. y	male	16	6	0.4189	0.0467646	Right	Forewing	uns	wet	116.306	0.25485	0.5759	0.0448508	NA	NA	NA	NA	105	0.21178	large	wet	0.00366585	0.0605463
925	417	moore	28-23-04	Ghana	2	Temp_23.1	Temp_1	28 C	75 % RH	Z. m. y	male	16	6	0.3818	0.0453411	Left	Forewing	ups	wet	102.75	0.2406	0.7147	0.0317048	NA	NA	NA	NA	105	0.178058	large	wet	0.0046815	0.0684215
926	382	moore	28-23-05	Ghana	2	Temp_23.1	Temp_1	28 C	75 % RH	Z. m. y	male	16	6	0.3645	0.0446457	Left	Forewing	ups	wet	95.026	0.1158	0.1676	0.0369984	NA	NA	NA	NA	105	0.19235	large	wet	0.00107161	0.0327355
927	239	moore	28-23-06	Ghana	2	Temp_23.1	Temp_1	28 C	75 % RH	Z. m. y	male	16	6	0.4118	0.0464988	Right	Forewing	uns	wet	95.7656	0.24175	0.66595	0.0476469	NA	NA	NA	NA	105	0.218282	large	wet	0.00423957	0.065112
928	447	moore	28-23-07	Ghana	2	Temp_23.1	Temp_1	28 C	75 % RH	Z. m. y	male	16	6	0.403	0.0461652	Left	Forewing	ups	wet	105.129	0.41665	0.95825	0.0322662	NA	NA	NA	NA	105	0.179628	large	wet	0.00592257	0.0769582
929	346	moore	28-23-08	Ghana	2	Temp_23.1	Temp_1	28 C	75 % RH	Z. m. y	male	16	7	0.386	0.0455067	Right	Forewing	uns	wet	95.0379	0.17235	0.2324	0.0443694	NA	NA	NA	NA	105	0.21064	large	wet	0.00140967	0.0375455
930	195	moore	28-23-09	Ghana	2	Temp_23.1	Temp_1	28 C	75 % RH	Z. m. y	female	17	6	0.5092	0.0469729	Left	Forewing	ups	wet	138.419	0.6511	2.2355	0.0370017	NA	NA	NA	NA	105	0.192358	large	wet	0.0113523	0.106547
931	321	moore	28-23-12	Ghana	2	Temp_23.1	Temp_1	28 C	75 % RH	Z. m. y	female	17	10	0.4174	0.0439611	Left	Forewing	ups	wet	119.391	0.51285	1.32015	0.0370637	NA	NA	NA	NA	105	0.192519	large	wet	0.00730351	0.0854606
932	240	moore	28-23-14	Ghana	2	Temp_23.1	Temp_1	28 C	75 % RH	Z. m. y	female	17	10	0.406	0.0435572	Right	Forewing	uns	wet	123.197	0.43795	1.4803	0.0363044	NA	NA	NA	NA	105	0.190537	large	wet	0.00799434	0.0894111
933	395	moore	28-23-15	Ghana	2	Temp_23.1	Temp_1	28 C	75 % RH	Z. m. y	male	17	10	0.4835	0.0461689	Left	Forewing	ups	wet	111.55	0.3282	0.93495	0.0348096	NA	NA	NA	NA	105	0.186573	large	wet	0.00604884	0.0777743
934	385	moore	28-23-16	Ghana	2	Temp_23.1	Temp_1	28 C	75 % RH	Z. m. y	male	18	9	0.5276	0.0448913	Left	Forewing	ups	wet	117.276	0.4351	0.80835	0.0278118	NA	NA	NA	NA	105	0.166769	large	wet	0.00556684	0.0746113
935	584	moore	28-23-18	Ghana	2	Temp_23.1	Temp_1	28 C	75 % RH	Z. m. y	male	18	9	0.4372	0.0421652	Left	Forewing	ups	wet	106.153	0.3011	0.6298	0.0218071	NA	NA	NA	NA	105	0.147672	small	dry	0.00398945	0.0631621
936	414	moore	28-23-20	Ghana	2	Temp_23.1	Temp_1	28 C	75 % RH	Z. m. y	male	18	9	0.3494	0.0391293	Left	Forewing	ups	wet	87.8171	0.2328	0.5112	0.0365134	NA	NA	NA	NA	105	0.191085	large	wet	0.00353116	0.0594236
937	262	moore	28-23-22	Ghana	2	Temp_23.1	Temp_1	28 C	75 % RH	Z. m. y	female	19	8	0.3311	0.036411	Right	Forewing	uns	wet	99.1242	0.42255	1.2803	0.0436631	NA	NA	NA	NA	105	0.208957	large	wet	0.00869966	0.093272
938	424	moore	28-29-01	Ghana	2	Temp_29.1	Temp_1	28 C	75 % RH	Z. m. y	male	14	6	0.3967	0.0524839	Right	Forewing	uns	wet	96.1869	0.1753	0.5585	0.0374594	NA	NA	NA	NA	107	0.193544	large	wet	0.003613	0.0601082
939	260	moore	28-29-02	Ghana	2	Temp_29.1	Temp_1	28 C	75 % RH	Z. m. y	male	14	6	0.42	0.0534919	Right	Forewing	uns	wet	104.084	0.24795	0.31825	0.045206	NA	NA	NA	NA	107	0.212617	large	wet	0.00184273	0.042927
940	168	moore	28-29-03	Ghana	2	Temp_29.1	Temp_1	28 C	75 % RH	Z. m. y	male	14	6	0.3912	0.0522402	Right	Forewing	uns	wet	90.9514	0.1923	0.39705	0.064191	NA	NA	NA	NA	107	0.253359	large	wet	0.00333498	0.0577493
941	249	moore	28-29-04	Ghana	2	Temp_29.1	Temp_1	28 C	75 % RH	Z. m. y	male	14	6	0.4463	0.054586	Right	Forewing	uns	wet	107.199	0.11795	0.01891	0.0387594	NA	NA	NA	NA	107	0.196874	large	wet	0.000146486	0.0121031
942	555	moore	28-29-05	Ghana	2	Temp_29.1	Temp_1	28 C	75 % RH	Z. m. y	male	14	6	0.4737	0.0556809	Right	Forewing	uns	wet	113.335	0.2815	0.6687	0.0211463	NA	NA	NA	NA	107	0.145418	small	dry	0.00460951	0.0678933
943	453	moore	28-29-06	Ghana	2	Temp_29.1	Temp_1	28 C	75 % RH	Z. m. y	male	14	6	0.4889	0.0562702	Left	Forewing	ups	wet	109.733	0.26685	0.4113	0.0293608	NA	NA	NA	NA	107	0.17135	large	wet	0.00276873	0.0526187
944	140	moore	28-29-10	Ghana	2	Temp_29.1	Temp_1	28 C	75 % RH	Z. m. y	female	15	NA	0.4821	0.0522742	Left	Forewing	ups	wet	123.647	0.50135	1.6535	0.0514827	NA	NA	NA	NA	107	0.226898	large	wet	0.0115443	0.107444
945	163	moore	28-29-11	Ghana	2	Temp_29.1	Temp_1	28 C	75 % RH	Z. m. y	female	15	NA	0.4674	0.0517374	Right	Forewing	uns	wet	135.779	0.58275	1.78715	0.0438864	NA	NA	NA	NA	107	0.209491	large	wet	0.012156	0.110254
946	280	moore	28-29-13	Ghana	2	Temp_29.1	Temp_1	28 C	75 % RH	Z. m. y	male	15	NA	0.4488	0.0510418	Left	Forewing	ups	wet	103.828	0.2459	0.59485	0.0392019	NA	NA	NA	NA	107	0.197995	large	wet	0.00393412	0.0627225
947	169	moore	28-29-16	Ghana	2	Temp_29.1	Temp_1	28 C	75 % RH	Z. m. y	female	16	9	0.5357	0.0507599	Left	Forewing	ups	wet	119.95	0.5351	1.60605	0.045028	NA	NA	NA	NA	107	0.212198	large	wet	0.0102379	0.101182
948	327	moore	28-29-17	Ghana	2	Temp_29.1	Temp_1	28 C	75 % RH	Z. m. y	female	16	9	0.4311	0.0472142	Left	Forewing	ups	wet	122.54	0.5474	1.98715	0.0333792	NA	NA	NA	NA	107	0.1827	large	wet	0.0134996	0.116188
949	316	moore	28-29-19	Ghana	2	Temp_29.1	Temp_1	28 C	75 % RH	Z. m. y	female	18	7	0.3941	0.0407314	Left	Forewing	ups	wet	127.196	0.58085	2.0381	0.0240005	NA	NA	NA	NA	107	0.154921	large	wet	0.0145082	0.12045
950	315	moore	28-29-20	Ghana	2	Temp_29.1	Temp_1	28 C	75 % RH	Z. m. y	female	18	7	0.3599	0.0395174	Left	Forewing	ups	wet	111.046	0.3582	1.5779	0.0205428	NA	NA	NA	NA	107	0.143328	small	dry	0.0129927	0.113985
951	461	moore	28-38-01	Ghana	2	moore_38.1	Temp_1	28 C	75 % RH	Z. m. y	male	14	11	0.4282	0.0538378	Left	Forewing	ups	wet	102.494	0.1749	0.31095	0.0276621	NA	NA	NA	NA	108	0.166319	large	wet	0.00252178	0.0502173
952	464	moore	28-38-02	Ghana	2	moore_38.1	Temp_1	28 C	75 % RH	Z. m. y	male	14	11	0.4366	0.0541876	Left	Forewing	ups	wet	96.0593	0.2657	0.6084	0.0338104	NA	NA	NA	NA	108	0.183876	large	wet	0.0042815	0.0654332
953	478	moore	28-38-04	Ghana	2	moore_38.1	Temp_1	28 C	75 % RH	Z. m. y	male	15	10	0.3748	0.0480664	Left	Forewing	ups	wet	87.7844	0.12025	0.3787	0.0344209	NA	NA	NA	NA	108	0.185529	large	wet	0.00263188	0.0513018
954	188	moore	28-38-06	Ghana	2	moore_38.1	Temp_1	28 C	75 % RH	Z. m. y	male	16	8	0.3878	0.0455774	Left	Forewing	ups	wet	103.29	0.2978	0.5718	0.0545066	NA	NA	NA	NA	108	0.233467	large	wet	0.00465144	0.0682015
955	205	moore	28-38-07	Ghana	2	moore_38.1	Temp_1	28 C	75 % RH	Z. m. y	male	16	9	0.5156	0.0501169	Right	Forewing	uns	wet	115.208	0.22545	0.63535	0.041688	NA	NA	NA	NA	108	0.204176	large	wet	0.00542922	0.0736832
956	272	moore	28-38-11	Ghana	2	moore_38.1	Temp_1	28 C	75 % RH	Z. m. y	female	16	8	0.4761	0.0488029	Right	Forewing	uns	wet	133.397	0.70885	2.10115	0.0363088	NA	NA	NA	NA	108	0.190549	large	wet	0.0149909	0.122437
957	290	moore	28-38-12	Ghana	2	moore_38.1	Temp_1	28 C	75 % RH	Z. m. y	female	17	8	0.4411	0.0447779	Left	Forewing	ups	wet	122.83	0.43685	1.319	0.0333614	NA	NA	NA	NA	108	0.182651	large	wet	0.00829281	0.0910649
958	182	moore	28-38-15	Ghana	2	moore_38.1	Temp_1	28 C	75 % RH	Z. m. y	female	17	8	0.4672	0.0456442	Right	Forewing	uns	wet	136.4	0.48935	1.7417	0.0387975	NA	NA	NA	NA	108	0.196971	large	wet	0.0117635	0.10846
959	149	moore	28-42-01	Ghana	2	moore_42.1	Temp_1	28 C	75 % RH	Z. m. y	male	15	7	0.4413	0.0507559	Right	Forewing	uns	wet	109.783	0.2602	0.4862	0.0561607	NA	NA	NA	NA	111	0.236982	large	wet	0.00316618	0.0562688
960	431	moore	28-42-02	Ghana	2	moore_42.1	Temp_1	28 C	75 % RH	Z. m. y	male	15	NA	0.4994	0.0528922	Right	Forewing	uns	wet	116.222	0.2503	0.5117	0.0296361	NA	NA	NA	NA	111	0.172151	large	wet	0.00364547	0.0603778
961	524	moore	28-42-03	Ghana	2	moore_42.1	Temp_1	28 C	75 % RH	Z. m. y	male	16	6	0.3954	0.0458732	Left	Forewing	ups	wet	99.8722	0.2394	0.5209	0.0288112	NA	NA	NA	NA	111	0.169739	large	wet	0.00340559	0.0583574
962	288	moore	28-42-04	Ghana	2	moore_42.1	Temp_1	28 C	75 % RH	Z. m. y	male	16	6	0.3481	0.0439658	Right	Forewing	uns	wet	109.658	0.3681	0.87845	0.0394953	NA	NA	NA	NA	111	0.198734	large	wet	0.0056526	0.0751838
963	323	moore	28-42-05	Ghana	2	moore_42.1	Temp_1	28 C	75 % RH	Z. m. y	male	16	6	0.5032	0.0497119	Left	Forewing	ups	wet	117.959	0.335	0.65905	0.036613	NA	NA	NA	NA	111	0.191345	large	wet	0.00410984	0.064108
964	281	moore	28-42-06	Ghana	2	moore_42.1	Temp_1	28 C	75 % RH	Z. m. y	male	16	7	0.419	0.0467683	Right	Forewing	uns	wet	96.7057	0.3558	0.7781	0.0474605	NA	NA	NA	NA	111	0.217854	large	wet	0.00470465	0.0685904
965	278	moore	28-42-07(2)	Ghana	2	moore_42.1	Temp_1	28 C	75 % RH	Z. m. y	female	NA	NA	NA	NA	Right	Forewing	uns	wet	97.8852	0.3848	1.3929	0.0494099	NA	NA	NA	NA	111	0.222283	large	wet	0.00820064	0.0905574
966	309	moore	28-42-08	Ghana	2	moore_42.1	Temp_1	28 C	75 % RH	Z. m. y	female	17	7	0.3452	0.0412643	Right	Forewing	uns	wet	113.832	0.651	1.9784	0.0382782	NA	NA	NA	NA	111	0.195648	large	wet	0.0131189	0.114538
967	476	moore	28-42-10	Ghana	2	moore_42.1	Temp_1	28 C	75 % RH	Z. m. y	male	19	5	NA	NA	Left	Forewing	ups	wet	115.824	0.22775	0.30615	0.0250765	NA	NA	NA	NA	111	0.158355	large	wet	0.00184075	0.0429039
968	213	moore	31-25-02	Ghana	2	Temp_25.1	Temp_1	31 C	75 % RH	Z. m. y	male	15	10	0.3841	0.0484608	Left	Forewing	ups	wet	106.796	0.2578	0.64965	0.0440892	NA	NA	NA	NA	107	0.209974	large	wet	0.00387837	0.0622766
969	135	moore	31-25-04	Ghana	2	Temp_25.1	Temp_1	31 C	75 % RH	Z. m. y	female	15	6	0.4055	0.0493445	Right	Forewing	uns	wet	111.569	0.3803	1.34155	0.0581932	NA	NA	NA	NA	107	0.241233	large	wet	0.00761249	0.0872496
970	430	moore	31-25-06	Ghana	2	Temp_25.1	Temp_1	31 C	75 % RH	Z. m. y	female	15	6	0.3707	0.0478905	Left	Forewing	ups	wet	98.889	0.1043	0.136855	0.0312874	NA	NA	NA	NA	107	0.176882	large	wet	0.000859494	0.0293171
971	559	moore	31-25-08	Ghana	2	Temp_25.1	Temp_1	31 C	75 % RH	Z. m. y	male	15	6	0.3186	0.0455328	Left	Forewing	ups	wet	102.554	0.2375	0.7586	0.0179543	NA	NA	NA	NA	107	0.133993	small	dry	0.00450467	0.0671169
972	542	moore	31-25-10	Ghana	2	Temp_25.1	Temp_1	31 C	75 % RH	Z. m. y	female	15	6	0.2996	0.044609	Right	Forewing	uns	wet	100.688	0.29305	1.03485	0.0242043	NA	NA	NA	NA	107	0.155577	large	wet	0.00690864	0.0831183
973	533	moore	31-25-12	Ghana	2	Temp_25.1	Temp_1	31 C	75 % RH	Z. m. y	female	16	9	0.3336	0.0433466	Right	Forewing	uns	wet	98.6356	0.38115	1.6064	0.0237707	NA	NA	NA	NA	107	0.154178	large	wet	0.0103361	0.101666
974	543	moore	31-25-13	Ghana	2	Temp_25.1	Temp_1	31 C	75 % RH	Z. m. y	female	16	9	0.4016	0.0461117	Right	Forewing	uns	wet	109.262	0.3309	1.20675	0.0242125	NA	NA	NA	NA	107	0.155604	large	wet	0.00834218	0.0913356
975	359	moore	31-25-14(2)	Ghana	2	Temp_25.1	Temp_1	31 C	75 % RH	Z. m. y	female	18	NA	0.42	0.0416048	Left	Forewing	ups	wet	124.013	0.47195	1.4384	0.0297339	NA	NA	NA	NA	107	0.172435	large	wet	0.00922864	0.0960658
976	324	moore	31-25-15	Ghana	2	Temp_25.1	Temp_1	31 C	75 % RH	Z. m. y	male	NA	NA	0.3688	NA	Left	Forewing	ups	wet	98.9246	0.065405	0.086815	0.0429566	NA	NA	NA	NA	107	0.20726	large	wet	0.000462807	0.0215129
977	563	moore	31-30-04	Ghana	2	moore_30.1	Temp_1	31 C	75 % RH	Z. m. y	female	15	9	0.4039	0.0492795	Right	Forewing	uns	wet	115.347	0.4693	1.2565	0.0181938	NA	NA	NA	NA	108	0.134884	small	dry	0.00640077	0.0800048
978	509	moore	31-30-08	Ghana	2	moore_30.1	Temp_1	31 C	75 % RH	Z. m. y	female	16	8	0.3701	0.0448731	Right	Forewing	uns	wet	112.64	0.39955	1.4726	0.0201208	NA	NA	NA	NA	108	0.141848	small	dry	0.00862829	0.0928886
979	229	moore	31-30-10	Ghana	2	moore_30.1	Temp_1	31 C	75 % RH	Z. m. y	female	16	8	0.4117	0.0464951	Right	Forewing	uns	wet	119.387	0.3787	1.2868	0.0356569	NA	NA	NA	NA	108	0.18883	large	wet	0.00739241	0.0859791
980	191	moore	31-30-11	Ghana	2	moore_30.1	Temp_1	31 C	75 % RH	Z. m. y	male	16	8	0.3674	0.0447637	Left	Forewing	ups	wet	97.1587	0.1673	0.34515	0.0531998	NA	NA	NA	NA	108	0.230651	large	wet	0.00288351	0.0536983
981	591	moore	31-30-13	Ghana	2	moore_30.1	Temp_1	31 C	75 % RH	Z. m. y	female	16	8	0.4136	0.0465665	Right	Forewing	uns	wet	100.428	0.3298	1.1705	0.0184121	NA	NA	NA	NA	108	0.135691	small	dry	0.00809235	0.0899575
982	439	moore	31-30-17	Ghana	2	moore_30.1	Temp_1	31 C	75 % RH	Z. m. y	male	17	7	0.3636	0.0419848	Left	Forewing	ups	wet	103.813	0.2688	0.6431	0.0277675	NA	NA	NA	NA	108	0.166636	large	wet	0.00404409	0.0635932
983	314	moore	31-31-01	Ghana	2	moore_31.1	Temp_1	31 C	75 % RH	Z. m. y	male	14	10	0.4019	0.0527122	Left	Forewing	ups	wet	105.14	0.2641	0.68905	0.0396593	NA	NA	NA	NA	108	0.199146	large	wet	0.00465424	0.068222
984	520	moore	31-31-03	Ghana	2	moore_31.1	Temp_1	31 C	75 % RH	Z. m. y	male	14	6	0.3553	0.0505907	Right	Forewing	uns	wet	90.0015	0.1529	0.4024	0.0257667	NA	NA	NA	NA	108	0.16052	large	wet	0.00258051	0.0507987
985	444	moore	31-31-04	Ghana	2	moore_31.1	Temp_1	31 C	75 % RH	Z. m. y	male	14	6	0.3794	0.0517096	Left	Forewing	ups	wet	97.2192	0.122505	0.45205	0.0328481	NA	NA	NA	NA	108	0.18124	large	wet	0.00331942	0.0576144
986	398	moore	31-31-05	Ghana	2	moore_31.1	Temp_1	31 C	75 % RH	Z. m. y	male	14	6	0.3895	0.0521644	Left	Forewing	ups	wet	99.5487	0.12215	0.3118	0.0329837	NA	NA	NA	NA	108	0.181614	large	wet	0.00219554	0.0468566
987	387	moore	31-31-07	Ghana	2	moore_31.1	Temp_1	31 C	75 % RH	Z. m. y	female	15	9	0.4317	0.0503852	Left	Forewing	ups	wet	125.981	0.40775	1.37465	0.0266725	NA	NA	NA	NA	108	0.163317	large	wet	0.0073912	0.0859721
988	320	moore	31-31-08	Ghana	2	moore_31.1	Temp_1	31 C	75 % RH	Z. m. y	male	15	9	0.3764	0.0481347	Right	Forewing	uns	wet	97.8101	0.17745	0.42635	0.0399433	NA	NA	NA	NA	108	0.199858	large	wet	0.00204673	0.0452408
989	209	moore	31-31-09	Ghana	2	moore_31.1	Temp_1	31 C	75 % RH	Z. m. y	female	15	9	0.4555	0.0512946	Right	Forewing	uns	wet	124.844	0.3951	1.31135	0.0396485	NA	NA	NA	NA	108	0.199119	large	wet	0.0087159	0.093359
990	296	moore	31-31-10	Ghana	2	moore_31.1	Temp_1	31 C	75 % RH	Z. m. y	male	16	8	0.4843	0.0490815	Left	Forewing	ups	wet	115.355	0.1867	0.47875	0.0323677	NA	NA	NA	NA	108	0.17991	large	wet	0.00297947	0.0545845
991	176	moore	31-31-13	Ghana	2	moore_31.1	Temp_1	31 C	75 % RH	Z. m. y	male	16	8	0.3766	0.0451343	Right	Forewing	uns	wet	102.581	0.26625	0.5914	0.0475635	NA	NA	NA	NA	108	0.218091	large	wet	0.00361771	0.0601474
992	345	moore	31-31-14	Ghana	2	moore_31.1	Temp_1	31 C	75 % RH	Z. m. y	male	16	8	0.4207	0.0468314	Left	Forewing	ups	wet	99.1174	0.1389	0.39005	0.0318028	NA	NA	NA	NA	108	0.178333	large	wet	0.00224471	0.0473783
993	436	moore	31-31-16	Ghana	2	moore_31.1	Temp_1	31 C	75 % RH	Z. m. y	male	17	7	0.3802	0.0426143	Right	Forewing	uns	wet	100.192	0.2241	0.6366	0.0341691	NA	NA	NA	NA	108	0.184849	large	wet	0.00364011	0.0603334
994	351	moore	31-31-18	Ghana	2	moore_31.1	Temp_1	31 C	75 % RH	Z. m. y	male	NA	NA	NA	NA	Left	Forewing	ups	wet	101.659	0.137925	0.53005	0.0386057	NA	NA	NA	NA	108	0.196483	large	wet	0.00279867	0.0529024
995	2	moore	31-31-19	Ghana	2	moore_31.1	Temp_1	31 C	75 % RH	Z. m. y	female	NA	NA	NA	NA	Right	Forewing	uns	wet	101.012	0.3558	1.3665	0.0367071	NA	NA	NA	NA	108	0.191591	large	wet	0.00942428	0.0970787
996	277	moore	31-32-01	Ghana	2	moore_32.1	Temp_1	31 C	75 % RH	Z. m. y	male	14	9	0.372	0.0513712	Right	Forewing	uns	wet	91.1934	0.1957	0.43795	0.0471378	NA	NA	NA	NA	109	0.217112	large	wet	0.00276771	0.052609
997	379	moore	31-32-02	Ghana	2	moore_32.1	Temp_1	31 C	75 % RH	Z. m. y	male	14	9	0.4256	0.0537286	Right	Forewing	uns	wet	107.06	0.1132	0.1824	0.0325061	NA	NA	NA	NA	109	0.180294	large	wet	0.00108015	0.0328656
998	525	moore	31-32-03	Ghana	2	moore_32.1	Temp_1	31 C	75 % RH	Z. m. y	male	14	9	0.4084	0.0529949	Left	Forewing	ups	wet	95.8458	0.065375	0.6585	0.0280449	NA	NA	NA	NA	109	0.167466	large	wet	0.00359242	0.0599368
999	495	moore	31-32-04	Ghana	2	moore_32.1	Temp_1	31 C	75 % RH	Z. m. y	male	14	9	0.402	0.0527166	Right	Forewing	uns	wet	93.3174	0.1419	0.12889	0.0315946	NA	NA	NA	NA	109	0.177749	large	wet	0.000877345	0.02962
1000	363	moore	31-32-07	Ghana	2	moore_32.1	Temp_1	31 C	75 % RH	Z. m. y	male	15	8	0.4728	0.0519359	Left	Forewing	ups	wet	111.099	0.2421	0.6203	0.0270902	NA	NA	NA	NA	109	0.164591	large	wet	0.00365959	0.0604946
1001	276	moore	31-32-08	Ghana	2	moore_32.1	Temp_1	31 C	75 % RH	Z. m. y	male	15	8	0.4164	0.0497828	Left	Forewing	ups	wet	96.9049	0.16325	0.1751	0.046337	NA	NA	NA	NA	109	0.21526	large	wet	0.0010162	0.0318779
1002	418	moore	31-32-09	Ghana	2	moore_32.1	Temp_1	31 C	75 % RH	Z. m. y	female	15	9	0.3616	0.0474954	Left	Forewing	ups	wet	110.933	0.3735	1.1768	0.0278041	NA	NA	NA	NA	109	0.166746	large	wet	0.00649233	0.080575
1003	329	moore	31-32-10	Ghana	2	moore_32.1	Temp_1	31 C	75 % RH	Z. m. y	male	15	8	0.4371	0.0505944	Right	Forewing	uns	wet	103.449	0.3029	0.7754	0.0393661	NA	NA	NA	NA	109	0.198409	large	wet	0.00499334	0.0706635
1004	238	moore	31-32-15	Ghana	2	moore_32.1	Temp_1	31 C	75 % RH	Z. m. y	female	16	7	0.4576	0.0481625	Right	Forewing	uns	wet	127.516	0.4923	1.5724	0.0400789	NA	NA	NA	NA	109	0.200197	large	wet	0.00981964	0.0990941
1005	152	moore	31-32-20	Ghana	2	moore_32.1	Temp_1	31 C	75 % RH	Z. m. y	female	18	5	0.4405	0.042271	Left	Forewing	ups	wet	124.659	0.47565	1.5084	0.051187	NA	NA	NA	NA	109	0.226245	large	wet	0.00941029	0.0970067
1006	367	moore	31-32-21	Ghana	2	moore_32.1	Temp_1	31 C	75 % RH	Z. m. y	female	18	5	0.4102	0.0412787	Left	Forewing	ups	wet	114.488	0.51025	1.5325	0.0310856	NA	NA	NA	NA	109	0.176311	large	wet	0.00973111	0.0986464
1007	508	moore	31-32-22	Ghana	2	moore_32.1	Temp_1	31 C	75 % RH	Z. m. y	male	NA	NA	NA	NA	Left	Forewing	ups	wet	105.814	0.2495	0.91795	0.0276835	NA	NA	NA	NA	109	0.166384	large	wet	0.00558877	0.0747581
1008	484	moore	31-33-02	Ghana	2	moore_33.1	Temp_1	31 C	75 % RH	Z. m. y	male	13	6	0.3644	0.0549435	Right	Forewing	uns	wet	88.401	0.1656	0.2994	0.0353038	NA	NA	NA	NA	109	0.187893	large	wet	0.00189033	0.0434779
1009	534	moore	31-33-03	Ghana	2	moore_33.1	Temp_1	31 C	75 % RH	Z. m. y	male	13	NA	0.3761	0.0555253	Left	Forewing	ups	wet	94.0781	0.2764	0.3513	0.0311061	NA	NA	NA	NA	109	0.176369	large	wet	0.00192845	0.0439142
1010	252	moore	31-33-06	Ghana	2	moore_33.1	Temp_1	31 C	75 % RH	Z. m. y	female	14	9	0.4636	0.0552823	Left	Forewing	ups	wet	123.234	0.33985	1.114	0.0364465	NA	NA	NA	NA	109	0.19091	large	wet	0.0057492	0.0758235
1011	468	moore	31-33-07	Ghana	2	moore_33.1	Temp_1	31 C	75 % RH	Z. m. y	male	14	9	0.3737	0.0514493	Right	Forewing	uns	wet	86.8958	0.16395	0.4722	0.0403708	NA	NA	NA	NA	109	0.200925	large	wet	0.00371168	0.0609236
1012	448	moore	31-33-08	Ghana	2	moore_33.1	Temp_1	31 C	75 % RH	Z. m. y	male	14	9	0.4068	0.0529256	Left	Forewing	ups	wet	110.492	0.2072	0.5147	0.0267385	NA	NA	NA	NA	109	0.163519	large	wet	0.0039641	0.0629611
1013	347	moore	31-33-11	Ghana	2	moore_33.1	Temp_1	31 C	75 % RH	Z. m. y	female	15	NA	0.4283	0.0502525	Right	Forewing	uns	wet	116.392	0.4658	1.60185	0.0338508	NA	NA	NA	NA	109	0.183986	large	wet	0.0105837	0.102877
1014	538	moore	31-33-18	Ghana	2	moore_33.1	Temp_1	31 C	75 % RH	Z. m. y	male	16	7	0.4437	0.0476698	Right	Forewing	uns	wet	116.838	0.22795	0.43335	0.0280302	NA	NA	NA	NA	109	0.167422	large	wet	0.00274106	0.0523552
1015	343	moore	31-33-19	Ghana	2	moore_33.1	Temp_1	31 C	75 % RH	Z. m. y	female	16	7	0.4665	0.0484727	Right	Forewing	uns	wet	125.104	0.45905	1.71365	0.0330048	NA	NA	NA	NA	109	0.181672	large	wet	0.0186665	0.136625
1016	511	moore	31-34-01	Ghana	2	moore_34.1	Temp_1	31 C	75 % RH	Z. m. y	male	14	9	0.4573	0.0550308	Left	Forewing	ups	wet	109.914	0.24305	0.5286	0.0237834	NA	NA	NA	NA	109	0.154219	large	wet	0.00563426	0.0750617
1017	473	moore	31-34-05	Ghana	2	moore_34.1	Temp_1	31 C	75 % RH	Z. m. y	female	16	7	0.351	0.0440875	Right	Forewing	uns	wet	101.282	0.36025	1.21965	0.0277244	NA	NA	NA	NA	109	0.166506	large	wet	0.0150303	0.122598
1018	340	moore	31-34-07	Ghana	2	moore_34.1	Temp_1	31 C	75 % RH	Z. m. y	male	NA	NA	NA	NA	Right	Forewing	uns	wet	98.8782	0.2351	0.22145	0.0434661	NA	NA	NA	NA	109	0.208485	large	wet	0.00298811	0.0546636
1019	596	moore	31-34-08	Ghana	2	moore_34.1	Temp_1	31 C	75 % RH	Z. m. y	female	NA	NA	NA	NA	Left	Forewing	ups	wet	91.2144	0.3386	1.28695	0.0186776	NA	NA	NA	NA	109	0.136666	small	dry	0.0137836	0.117403
1020	499	moore	31-39-01	Ghana	2	moore_39.1	Temp_1	31 C	75 % RH	Z. m. y	male	13	9	0.445	0.0587277	Left	Forewing	ups	wet	102.63	0.20625	0.4737	0.0278619	NA	NA	NA	NA	110	0.166919	large	wet	0.00527174	0.0726067
1021	233	moore	31-39-04	Ghana	2	moore_39.1	Temp_1	31 C	75 % RH	Z. m. y	male	15	7	0.4375	0.0506098	Right	Forewing	uns	wet	111.389	0.1755	0.39645	0.0397245	NA	NA	NA	NA	110	0.19931	large	wet	0.00288045	0.0536699
1022	223	moore	31-39-05	Ghana	2	moore_39.1	Temp_1	31 C	75 % RH	Z. m. y	female	16	6	0.4484	0.0478375	Left	Forewing	ups	wet	127.108	0.48305	1.3016	0.0367279	NA	NA	NA	NA	110	0.191645	large	wet	0.00905186	0.0951412
1023	420	moore	31-39-06	Ghana	2	moore_39.1	Temp_1	31 C	75 % RH	Z. m. y	male	16	6	0.3826	0.0453727	Right	Forewing	uns	wet	98.5462	0.2433	0.5945	0.0365276	NA	NA	NA	NA	110	0.191122	large	wet	0.00633094	0.0795672
1024	194	moore	31-39-09	Ghana	2	moore_39.1	Temp_1	31 C	75 % RH	Z. m. y	female	16	6	0.3612	0.0445105	Left	Forewing	ups	wet	113.318	0.2815	0.97575	0.0459463	NA	NA	NA	NA	110	0.214351	large	wet	0.0105009	0.102474
1025	217	moore	31-39-10	Ghana	2	moore_39.1	Temp_1	31 C	75 % RH	Z. m. y	male	15	7	0.474	0.0519798	Right	Forewing	uns	wet	119.204	0.31645	0.94565	0.0380956	NA	NA	NA	NA	110	0.195181	large	wet	0.0079067	0.0889196
1026	190	moore	31-40-03	Ghana	2	moore_40.1	Temp_1	31 C	75 % RH	Z. m. y	male	14	8	0.4122	0.0531587	Left	Forewing	ups	wet	110.747	0.10988	0.2213	0.0406417	NA	NA	NA	NA	110	0.201598	large	wet	0.00191735	0.0437876
1027	393	moore	31-40-04	Ghana	2	moore_40.1	Temp_1	31 C	75 % RH	Z. m. y	female	16	6	0.3893	0.0456361	Left	Forewing	ups	wet	110.614	0.3359	1.08845	0.0291571	NA	NA	NA	NA	110	0.170754	large	wet	0.0102455	0.10122
1028	465	moore	31-40-06	Ghana	2	moore_40.1	Temp_1	31 C	75 % RH	Z. m. y	female	17	5	0.5229	0.0473904	Right	Forewing	uns	wet	125.108	0.415	1.5688	0.0275354	NA	NA	NA	NA	110	0.165938	large	wet	0.0126764	0.112589
1029	285	moore	31-40-14	Ghana	2	moore_40.1	Temp_1	31 C	75 % RH	Z. m. y	female	17	6	0.3542	0.0416199	Right	Forewing	uns	wet	117.588	0.3909	1.323	0.0380086	NA	NA	NA	NA	110	0.194958	large	wet	0.0104234	0.102095
1030	2909	hallow	1_33_55	India	1	hallow_5	Temp_HR	33 C	55 % RH	Z. m. y	female	14	5	0.3554	0.0505954	Right	Forewing	uns	wet	107.475	NA	0.7243	0.043132	NA	NA	NA	NA	NA	0.207682	large	wet	0.00506062	0.071138
1031	2919	hallow	10_33_55	India	1	hallow_5	Temp_HR	33 C	55 % RH	Z. m. y	female	15	6	0.3388	0.0464754	Right	Forewing	uns	wet	112.299	NA	2.1348	0.0219254	NA	NA	NA	NA	NA	0.148072	small	dry	0.0154512	0.124303
1032	2929	hallow	11_33_55	India	1	hallow_5	Temp_HR	33 C	55 % RH	Z. m. y	male	15	8	0.3022	0.0447377	Right	Forewing	uns	wet	111.089	NA	0.7253	0.0319688	NA	NA	NA	NA	NA	0.178798	large	wet	0.00754379	0.086855
1033	2939	hallow	12_33_55	India	1	hallow_5	Temp_HR	33 C	55 % RH	Z. m. y	male	15	8	0.2919	0.0442235	Right	Forewing	uns	wet	NA	NA	NA	NA	NA	NA	NA	NA	NA	NA	NA	wet	NA	NA
1034	2949	hallow	13_33_55	India	1	hallow_5	Temp_HR	33 C	55 % RH	Z. m. y	female	15	7	0.2829	0.0437643	Right	Forewing	uns	wet	114.765	NA	1.6928	0.0207371	NA	NA	NA	NA	NA	0.144004	small	dry	0.014024	0.118423
1035	2959	hallow	14_33_55	India	1	hallow_7	Temp_HR	33 C	55 % RH	Z. m. y	male	15	7	0.268	0.042982	Right	Forewing	uns	wet	NA	NA	NA	NA	NA	NA	NA	NA	NA	NA	NA	wet	NA	NA
1036	2969	hallow	15_33_55	India	1	hallow_7	Temp_HR	33 C	55 % RH	Z. m. y	male	15	6	0.2742	0.043311	Right	Forewing	uns	wet	NA	NA	NA	NA	NA	NA	NA	NA	NA	NA	NA	wet	NA	NA
1037	2977	hallow	16_33_55	India	1	hallow_7	Temp_HR	33 C	55 % RH	Z. m. y	female	15	NA	0.3057	0.0449097	Right	Forewing	uns	NA	NA	NA	NA	NA	NA	NA	NA	NA	NA	NA	NA	NA	NA	NA
1038	2987	hallow	17_33_55	India	1	hallow_7	Temp_HR	33 C	55 % RH	Z. m. y	male	15	7	0.3088	0.045061	Right	Forewing	uns	wet	104.752	NA	1.1347	0.0484727	NA	NA	NA	NA	NA	0.220165	large	wet	0.00892882	0.0944924
1039	2997	hallow	18_33_55	India	1	hallow_7	Temp_HR	33 C	55 % RH	Z. m. y	male	15	NA	0.2944	0.0443494	Right	Forewing	uns	NA	NA	NA	NA	NA	NA	NA	NA	NA	NA	NA	NA	NA	NA	NA
1040	3007	hallow	19_33_55	India	1	hallow_7	Temp_HR	33 C	55 % RH	Z. m. y	male	18	NA	0.3611	0.0395612	Right	Forewing	uns	NA	NA	NA	NA	NA	NA	NA	NA	NA	NA	NA	NA	NA	NA	NA
1041	3017	hallow	2_33_55	India	1	hallow_5	Temp_HR	33 C	55 % RH	Z. m. y	male	14	5	0.292	0.0473878	Right	Forewing	NA	wet	93.8515	NA	0.6225	0.0337075	NA	NA	NA	NA	NA	0.183596	large	wet	0.00587476	0.076647
1042	3027	hallow	20_33_55	India	1	hallow_5	Temp_HR	33 C	55 % RH	Z. m. y	female	19	NA	0.3015	0.0352919	Right	Forewing	NA	NA	NA	NA	NA	NA	NA	NA	NA	NA	NA	NA	NA	NA	NA	NA
1043	3037	hallow	21_33_55	India	1	hallow_7	Temp_HR	33 C	55 % RH	Z. m. y	female	20	NA	0.317	0.0340923	Right	Forewing	NA	NA	NA	NA	NA	NA	NA	NA	NA	NA	NA	NA	NA	NA	NA	NA
1044	3047	hallow	22_33_55	India	1	hallow_13	Temp_HR	33 C	55 % RH	Z. m. y	male	14	NA	0.3053	0.0480966	Right	Forewing	NA	NA	NA	NA	NA	NA	NA	NA	NA	NA	NA	NA	NA	NA	NA	NA
1045	3057	hallow	23_33_55	India	1	hallow_13	Temp_HR	33 C	55 % RH	Z. m. y	male	14	NA	0.2044	0.0420758	Right	Forewing	NA	NA	NA	NA	NA	NA	NA	NA	NA	NA	NA	NA	NA	NA	NA	NA
1046	3065	hallow	24_33_55	India	1	hallow_13	Temp_HR	33 C	55 % RH	Z. m. y	male	14	8	0.2612	0.0456593	Right	Forewing	NA	wet	122.781	NA	1.7048	0.0356015	NA	NA	NA	NA	NA	0.188684	large	wet	0.0150359	0.122621
1047	3073	hallow	25_33_55	India	1	hallow_16	Temp_HR	33 C	55 % RH	Z. m. y	male	15	5	0.2811	0.0436713	Right	Forewing	NA	wet	NA	NA	NA	NA	NA	NA	NA	NA	NA	NA	NA	wet	NA	NA
1048	3081	hallow	26_33_55	India	1	hallow_16	Temp_HR	33 C	55 % RH	Z. m. y	female	15	5	0.3071	0.0449782	Right	Forewing	NA	wet	103.22	NA	1.3311	0.0648217	NA	NA	NA	NA	NA	0.254601	large	wet	0.00863873	0.0929448
1049	3089	hallow	27_33_55	India	1	hallow_13	Temp_HR	33 C	55 % RH	Z. m. y	male	16	7	0.2123	0.0372846	Right	Forewing	NA	wet	NA	NA	NA	NA	NA	NA	NA	NA	NA	NA	NA	wet	NA	NA
1050	3097	hallow	28_33_55	India	1	hallow_13	Temp_HR	33 C	55 % RH	Z. m. y	male	16	7	0.2863	0.0411927	Right	Forewing	NA	wet	99.5662	NA	1.4654	0.058542	NA	NA	NA	NA	NA	0.241954	large	wet	0.0117672	0.108477
1051	3103	hallow	29_33_55	India	1	hallow_13	Temp_HR	33 C	55 % RH	Z. m. y	male	16	NA	0.2911	0.0414217	Right	Forewing	NA	NA	NA	NA	NA	NA	NA	NA	NA	NA	NA	NA	NA	NA	NA	NA
1052	3111	hallow	3_33_55	India	1	hallow_5	Temp_HR	33 C	55 % RH	Z. m. y	female	14	7	0.2721	0.0462858	Right	Forewing	NA	wet	90.5405	NA	0.5215	0.0340389	NA	NA	NA	NA	NA	0.184496	large	wet	0.00295759	0.0543838
1053	3119	hallow	30_33_55	India	1	hallow_13	Temp_HR	33 C	55 % RH	Z. m. y	male	16	8	0.3063	0.0421304	Right	Forewing	NA	wet	86.4973	NA	0.7405	0.0427008	NA	NA	NA	NA	NA	0.206642	large	wet	0.00537396	0.0733073
1054	3125	hallow	31_33_55	India	1	hallow_13	Temp_HR	33 C	55 % RH	Z. m. y	female	16	8	0.308	0.0422082	Right	Forewing	NA	wet	NA	NA	NA	NA	NA	NA	NA	NA	NA	NA	NA	wet	NA	NA
1055	3131	hallow	32_33_55	India	1	hallow_13	Temp_HR	33 C	55 % RH	Z. m. y	male	16	NA	0.2977	0.0417324	Right	Forewing	NA	NA	NA	NA	NA	NA	NA	NA	NA	NA	NA	NA	NA	NA	NA	NA
1056	3137	hallow	33_33_55	India	1	hallow_13	Temp_HR	33 C	55 % RH	Z. m. y	female	16	NA	0.2417	0.0389319	Right	Forewing	NA	NA	NA	NA	NA	NA	NA	NA	NA	NA	NA	NA	NA	NA	NA	NA
1057	3143	hallow	34_33_55	India	1	hallow_13	Temp_HR	33 C	55 % RH	Z. m. y	female	18	NA	0.2092	0.0329798	Right	Forewing	NA	NA	NA	NA	NA	NA	NA	NA	NA	NA	NA	NA	NA	NA	NA	NA
1058	3149	hallow	35_33_55	India	1	hallow_13	Temp_HR	33 C	55 % RH	Z. m. y	male	18	NA	0.2649	0.0356797	Right	Forewing	NA	NA	NA	NA	NA	NA	NA	NA	NA	NA	NA	NA	NA	NA	NA	NA
1059	3153	hallow	36_33_55	India	1	hallow_16	Temp_HR	33 C	55 % RH	Z. m. y	female	16	NA	0.299	0.041793	Right	Forewing	NA	NA	NA	NA	NA	NA	NA	NA	NA	NA	NA	NA	NA	NA	NA	NA
1060	3157	hallow	37_33_55	India	1	hallow_16	Temp_HR	33 C	55 % RH	Z. m. y	male	16	NA	0.2998	0.0418303	Right	Forewing	NA	NA	NA	NA	NA	NA	NA	NA	NA	NA	NA	NA	NA	NA	NA	NA
1061	3161	hallow	38_33_55	India	1	hallow_16	Temp_HR	33 C	55 % RH	Z. m. y	male	16	NA	0.2549	0.0396281	Right	Forewing	NA	NA	NA	NA	NA	NA	NA	NA	NA	NA	NA	NA	NA	NA	NA	NA
1062	3165	hallow	39_33_55	India	1	hallow_16	Temp_HR	33 C	55 % RH	Z. m. y	female	19	NA	0.2546	0.0333579	Right	Forewing	NA	NA	NA	NA	NA	NA	NA	NA	NA	NA	NA	NA	NA	NA	NA	NA
1063	3173	hallow	4_33_55	India	1	hallow_5	Temp_HR	33 C	55 % RH	Z. m. y	male	15	9	0.2842	0.0438312	Right	Forewing	NA	wet	NA	NA	NA	NA	NA	NA	NA	NA	NA	NA	NA	wet	NA	NA
1064	3179	hallow	41_33_55	India	1	hallow_13	Temp_HR	33 C	55 % RH	Z. m. y	male	21	NA	0.2389	0.0295474	Right	Forewing	NA	NA	NA	NA	NA	NA	NA	NA	NA	NA	NA	NA	NA	NA	NA	NA
1065	3181	hallow	42_33_55	India	1	hallow_19	Temp_HR	33 C	55 % RH	Z. m. y	male	18	NA	0.2628	0.0355852	Right	Forewing	NA	NA	NA	NA	NA	NA	NA	NA	NA	NA	NA	NA	NA	NA	NA	NA
1066	3183	hallow	43_33_55	India	1	hallow_19	Temp_HR	33 C	55 % RH	Z. m. y	male	18	NA	0.3413	0.0388245	Right	Forewing	NA	NA	NA	NA	NA	NA	NA	NA	NA	NA	NA	NA	NA	NA	NA	NA
1067	3185	hallow	44_33_55	India	1	hallow_16	Temp_HR	33 C	55 % RH	Z. m. y	female	18	NA	0.2298	0.0340286	Right	Forewing	NA	NA	NA	NA	NA	NA	NA	NA	NA	NA	NA	NA	NA	NA	NA	NA
1068	3187	hallow	45_33_55	India	1	hallow_16	Temp_HR	33 C	55 % RH	Z. m. y	female	18	NA	0.1982	0.0323913	Right	Forewing	NA	NA	NA	NA	NA	NA	NA	NA	NA	NA	NA	NA	NA	NA	NA	NA
1069	3189	hallow	46_33_55	India	1	hallow_16	Temp_HR	33 C	55 % RH	Z. m. y	male	18	NA	0.2256	0.03382	Right	Forewing	NA	NA	NA	NA	NA	NA	NA	NA	NA	NA	NA	NA	NA	NA	NA	NA
1070	3191	hallow	47_33_55	India	1	hallow_16	Temp_HR	33 C	55 % RH	Z. m. y	male	18	7	0.295	0.0369829	Right	Forewing	NA	wet	NA	NA	NA	NA	NA	NA	NA	NA	NA	NA	NA	wet	NA	NA
1071	3193	hallow	48_33_55	India	1	hallow_16	Temp_HR	33 C	55 % RH	Z. m. y	female	18	NA	0.2152	0.0332921	Right	Forewing	NA	NA	NA	NA	NA	NA	NA	NA	NA	NA	NA	NA	NA	NA	NA	NA
1072	3195	hallow	49_33_55	India	1	hallow_16	Temp_HR	33 C	55 % RH	Z. m. y	male	18	NA	0.2726	0.0360221	Right	Forewing	NA	NA	NA	NA	NA	NA	NA	NA	NA	NA	NA	NA	NA	NA	NA	NA
1073	3201	hallow	5_33_55	India	1	hallow_5	Temp_HR	33 C	55 % RH	Z. m. y	female	15	7	0.2709	0.0431365	Right	Forewing	NA	wet	101.916	NA	1.2774	0.0473755	NA	NA	NA	NA	NA	0.217659	large	wet	0.00852031	0.0923055
1074	3205	hallow	50_33_55	India	1	hallow_19	Temp_HR	33 C	55 % RH	Z. m. y	male	17	NA	0.2772	0.0383544	Right	Forewing	NA	NA	NA	NA	NA	NA	NA	NA	NA	NA	NA	NA	NA	NA	NA	NA
1075	3207	hallow	51_33_55	India	1	hallow_19	Temp_HR	33 C	55 % RH	Z. m. y	male	17	NA	0.267	0.0378781	Right	Forewing	NA	NA	NA	NA	NA	NA	NA	NA	NA	NA	NA	NA	NA	NA	NA	NA
1076	3209	hallow	52_33_55	India	1	hallow_13	Temp_HR	33 C	55 % RH	Z. m. y	male	20	NA	0.2611	0.0319575	Right	Forewing	NA	NA	NA	NA	NA	NA	NA	NA	NA	NA	NA	NA	NA	NA	NA	NA
1077	3211	hallow	53_33_55	India	1	hallow_13	Temp_HR	33 C	55 % RH	Z. m. y	male	20	NA	0.2726	0.0324199	Right	Forewing	NA	NA	NA	NA	NA	NA	NA	NA	NA	NA	NA	NA	NA	NA	NA	NA
1078	3213	hallow	54_33_55	India	1	hallow_16	Temp_HR	33 C	55 % RH	Z. m. y	female	18	NA	0.2305	0.0340631	Right	Forewing	NA	NA	NA	NA	NA	NA	NA	NA	NA	NA	NA	NA	NA	NA	NA	NA
1079	3215	hallow	55_33_55	India	1	hallow_13	Temp_HR	33 C	55 % RH	Z. m. y	male	22	7	0.3406	0.0317438	Right	Forewing	NA	wet	NA	NA	NA	NA	NA	NA	NA	NA	NA	NA	NA	wet	NA	NA
1080	3217	hallow	56_33_55	India	1	hallow_13	Temp_HR	33 C	55 % RH	Z. m. y	male	22	7	0.199	0.0265376	Right	Forewing	NA	wet	NA	NA	NA	NA	NA	NA	NA	NA	NA	NA	NA	wet	NA	NA
1081	3219	hallow	57_33_55	India	1	hallow_19	Temp_HR	33 C	55 % RH	Z. m. y	female	19	7	0.2616	0.0336609	Right	Forewing	NA	wet	NA	NA	NA	NA	NA	NA	NA	NA	NA	NA	NA	wet	NA	NA
1082	3221	hallow	58_33_55	India	1	hallow_19	Temp_HR	33 C	55 % RH	Z. m. y	male	19	NA	0.234	0.0324328	Right	Forewing	NA	NA	NA	NA	NA	NA	NA	NA	NA	NA	NA	NA	NA	NA	NA	NA
1083	3223	hallow	59_33_55	India	1	hallow_19	Temp_HR	33 C	55 % RH	Z. m. y	male	19	7	0.2694	0.0339922	Right	Forewing	NA	wet	NA	NA	NA	NA	NA	NA	NA	NA	NA	NA	NA	wet	NA	NA
1084	3231	hallow	6_33_55	India	1	hallow_5	Temp_HR	33 C	55 % RH	Z. m. y	male	15	7	0.2982	0.0445394	Right	Forewing	NA	wet	102.223	NA	1.4688	0.0230066	NA	NA	NA	NA	NA	0.151679	large	wet	0.0102722	0.101352
1085	3237	hallow	61_33_55	India	1	hallow_19	Temp_HR	33 C	55 % RH	Z. m. y	male	19	NA	0.2321	0.0323448	Right	Forewing	NA	NA	NA	NA	NA	NA	NA	NA	NA	NA	NA	NA	NA	NA	NA	NA
1086	3239	hallow	62_33_55	India	1	hallow_19	Temp_HR	33 C	55 % RH	Z. m. y	male	19	7	0.3044	0.0354047	Right	Forewing	NA	wet	93.1081	NA	0.3905	0.037217	NA	NA	NA	NA	NA	0.192917	large	wet	0.00288445	0.0537071
1087	3247	hallow	7_33_55	India	1	hallow_5	Temp_HR	33 C	55 % RH	Z. m. y	female	15	6	0.3177	0.0454898	Right	Forewing	NA	wet	109.285	NA	1.6144	0.0217385	NA	NA	NA	NA	NA	0.14744	small	dry	0.0111524	0.105605
1088	3255	hallow	8_33_55	India	1	hallow_5	Temp_HR	33 C	55 % RH	Z. m. y	male	15	7	0.3376	0.0464205	Right	Forewing	NA	wet	NA	NA	NA	NA	NA	NA	NA	NA	NA	NA	NA	wet	NA	NA
1089	3265	hallow	9_33_55	India	1	hallow_5	Temp_HR	33 C	55 % RH	Z. m. y	male	15	7	0.2633	0.0427293	Right	Forewing	NA	wet	101.402	NA	0.9339	0.0245962	NA	NA	NA	NA	NA	0.156832	large	wet	0.00752257	0.0867328
1090	2911	hallow	1_33_85	India	1	hallow_6	Temp_HR	33 C	85 % RH	Z. m. y	female	15	6	0.3665	0.047709	Right	Forewing	uns	wet	119.095	NA	1.2232	0.0329637	NA	NA	NA	NA	NA	0.181559	large	wet	0.00738962	0.0859629
1091	2921	hallow	10_33_85	India	1	hallow_8	Temp_HR	33 C	85 % RH	Z. m. y	female	14	6	0.3367	0.049692	Right	Forewing	uns	wet	NA	NA	NA	NA	NA	NA	NA	NA	NA	NA	NA	wet	NA	NA
1092	2931	hallow	11_33_85	India	1	hallow_8	Temp_HR	33 C	85 % RH	Z. m. y	female	14	6	0.3349	0.0496033	Right	Forewing	uns	wet	NA	NA	NA	NA	NA	NA	NA	NA	NA	NA	NA	wet	NA	NA
1093	2941	hallow	12_33_85	India	1	hallow_8	Temp_HR	33 C	85 % RH	Z. m. y	male	14	7	0.3541	0.0505336	Right	Forewing	uns	wet	NA	NA	NA	NA	NA	NA	NA	NA	NA	NA	NA	wet	NA	NA
1094	2951	hallow	13_33_85	India	1	hallow_6	Temp_HR	33 C	85 % RH	Z. m. y	male	19	7	0.3905	0.0384698	Right	Forewing	uns	wet	NA	NA	NA	NA	NA	NA	NA	NA	NA	NA	NA	wet	NA	NA
1095	2961	hallow	14_33_85	India	1	hallow_6	Temp_HR	33 C	85 % RH	Z. m. y	male	16	8	0.2693	0.0403607	Right	Forewing	uns	wet	NA	NA	NA	NA	NA	NA	NA	NA	NA	NA	NA	wet	NA	NA
1096	2971	hallow	15_33_85	India	1	hallow_6	Temp_HR	33 C	85 % RH	Z. m. y	female	16	7	0.4637	0.0483755	Right	Forewing	uns	wet	NA	NA	NA	NA	NA	NA	NA	NA	NA	NA	NA	wet	NA	NA
1097	2979	hallow	16_33_85	India	1	hallow_8	Temp_HR	33 C	85 % RH	Z. m. y	female	16	NA	0.3621	0.0445475	Right	Forewing	uns	NA	NA	NA	NA	NA	NA	NA	NA	NA	NA	NA	NA	NA	NA	NA
1098	2999	hallow	18_33_85	India	1	hallow_8	Temp_HR	33 C	85 % RH	Z. m. y	female	21	7	0.3463	0.0334399	Right	Forewing	uns	wet	NA	NA	NA	NA	NA	NA	NA	NA	NA	NA	NA	wet	NA	NA
1099	3009	hallow	19_33_85	India	1	hallow_8	Temp_HR	33 C	85 % RH	Z. m. y	female	21	NA	0.2078	0.0282052	Right	Forewing	uns	NA	NA	NA	NA	NA	NA	NA	NA	NA	NA	NA	NA	NA	NA	NA
1100	3049	hallow	22_33_85	India	1	hallow_15	Temp_HR	33 C	85 % RH	Z. m. y	male	15	NA	0.2498	0.0419862	Right	Forewing	NA	NA	NA	NA	NA	NA	NA	NA	NA	NA	NA	NA	NA	NA	NA	NA
1101	3059	hallow	23_33_85	India	1	hallow_15	Temp_HR	33 C	85 % RH	Z. m. y	male	15	NA	0.266	0.0428749	Right	Forewing	NA	NA	NA	NA	NA	NA	NA	NA	NA	NA	NA	NA	NA	NA	NA	NA
1102	3067	hallow	24_33_85	India	1	hallow_9	Temp_HR	33 C	85 % RH	Z. m. y	female	26	7	0.3823	0.0279144	Right	Forewing	NA	wet	NA	NA	NA	NA	NA	NA	NA	NA	NA	NA	NA	wet	NA	NA
1103	3113	hallow	3_33_85	India	1	hallow_6	Temp_HR	33 C	85 % RH	Z. m. y	female	16	7	0.3212	0.0428028	Right	Forewing	NA	wet	109.418	NA	1.5253	0.0268321	NA	NA	NA	NA	NA	0.163805	large	wet	0.013059	0.114276
1104	3175	hallow	4_33_85	India	1	hallow_6	Temp_HR	33 C	85 % RH	Z. m. y	male	16	8	0.4099	0.0464272	Right	Forewing	NA	wet	109.625	NA	0.6598	0.0561279	NA	NA	NA	NA	NA	0.236913	large	wet	0.00754824	0.0868806
1105	3203	hallow	5_33_85	India	1	hallow_6	Temp_HR	33 C	85 % RH	Z. m. y	male	16	7	0.3949	0.0458538	Right	Forewing	NA	wet	124.599	NA	0.9883	0.0398197	NA	NA	NA	NA	NA	0.199549	large	wet	0.0114835	0.107161
1106	3233	hallow	6_33_85	India	1	hallow_6	Temp_HR	33 C	85 % RH	Z. m. y	female	16	8	0.4114	0.0464838	Right	Forewing	NA	dry	NA	NA	NA	NA	NA	NA	NA	NA	NA	NA	NA	dry	NA	NA
1107	3249	hallow	7_33_85	India	1	hallow_8	Temp_HR	33 C	85 % RH	Z. m. y	male	14	7	0.2931	0.0474472	Right	Forewing	NA	wet	82.8111	NA	0.9191	0.0351777	NA	NA	NA	NA	NA	0.187557	large	wet	0.00696542	0.0834591
1108	3257	hallow	8_33_85	India	1	hallow_8	Temp_HR	33 C	85 % RH	Z. m. y	female	14	7	0.3377	0.0497411	Right	Forewing	NA	wet	NA	NA	NA	NA	NA	NA	NA	NA	NA	NA	NA	wet	NA	NA
1109	3267	hallow	9_33_85	India	1	hallow_8	Temp_HR	33 C	85 % RH	Z. m. y	female	14	7	0.3025	0.0479491	Right	Forewing	NA	wet	NA	NA	NA	NA	NA	NA	NA	NA	NA	NA	NA	wet	NA	NA

## Sheet: ReadMe
This file includes data for cases where sex is known. Sex was unknown for pilot data in the Temperature and Humidity experiment
Column name	meaning
dat_id	unique data ID number
Author	person who collected the observation (Elizbeth Moore, Sridhar Halali, or Freerk Molleman)
Ind	Name of the individual butterfly
pop	Population of origin
gen	Generation in captivity
sleeve	name of the sleeve
expt	name of the experiment
Temp	Rearing temperature
Humidity	Rearing Relative Humidity
plant	Host plant species on which the individual was reared
sex	whether it was a male or a female
larv_time	time between egg-hatching and pupation in days
pup_time	time between pupation and adult eclosion in days
pup_mss	mass of the pupa (grams)
grwth_rate	growth rate calculated as (pupal mass)1/3 / (larval development time)
quirality	left or right wing
wingtype	front- or hind-wing
Side	upper (dorsal) or under (ventral) side of the wing
phenotype	Categorized as dry or wet season phenotype
WA	wing area proxie in mm2
TAsm	small wing tip area (not used in analyses) in mm2
TAlg	large wing tip area in mm2 (used in analyses)
ES	Relative eyespot size (area of the eyespot/WA)
cat_eyesp	categorized eyespot size (for those without images)
mn_cat_eyesp	mean categorized eyespot
cat_wingshape	categorized wing shape
cat_irror	categorized wing background coloration (wet season forms are strongly irrorated, dry more evenly colored)
hatched_date	date of egg hatching
sqrtES	square root of relative eyespot size
relTAlg	relative size of the large wing tip area (TAlg/WA)
sqrtRelTAlg	square root of the relative size of the large wing tip area (TAlg/WA)
